# Supplementary material for: Analysis of the Compositional Features and Codon Usage Pattern of Genes Involved in Human Autophagy
Source: Cells. 2022 Oct 12;11(20):3203. doi: 10.3390/cells11203203 (PMC9601114; doi:10.3390/cells11203203)
Supplement: Supplementary file 1 [file cells-11-03203-s001.zip › Supplementary Table S1 .xlsx]

## Sheet: Sheet1
ATGs	Gene	NCBI Gene	Chromosome	Reference	NCBI	HGNC ID	Role In
	Acronym	Accession no.	Location		RefSeq ID		Autophagy
autophagy and beclin 1 regulator 1	AMBRA1	NC_000011.10	11p11.2	HGNC	NM_017749.3	HGNC:25990	Acts as a key regulator of autophagy by modulating the BECN1-PIK3C3 complex
apolipoprotein L1	APOL1	NC_000022.11	22q12.3		NM_145343.3	HGNC:618	ApoL1 induces autophagy ; directly or indirectly, activates the translocation of LC3-II to the autophagosomes
aryl hydrocarbon receptor nuclear translocator	ARNT	NC_000001.11	1q21.3		NM_001197325.2	HGNC:700	The encoded protein by this gene has been identified as the beta subunit of a heterodimeric transcription factor, hypoxia-inducible factor 1 (HIF1). A t(1;12)(q21;p13) translocation, which results in a TEL-ARNT fusion protein, is associated with acute myeloblastic leukemia.
arylsulfatase A	ARSA	NC_000022.11	22q13.33		NM_000487.6	HGNC:713	Arylsulfatase may control melanoma progression ; ARSA, the arylsulfatase A gene, appears to mediate BAG1, PEX3, and WIPI1 interaction with melanoma
arylsulfatase B	ARSB	NC_000005.10	5q14.1		NM_000046.5	HGNC:714	Arylsulfatase B is targetted to the lysozyme. Mucopolysaccharidosis type VI is an autosomal recessive lysosomal storage disorder resulting from a deficiency of arylsulfatase B.
activating transcription factor 4	ATF4	NC_000022.11	22q13.1		NM_001675.4	HGNC:786	ATF4 facilitates autophagy through direct binding to a cyclic AMP response element binding site in the LC3B promoter, resulting in LC3B upregulation
activating transcription factor 6	ATF6	NC_000001.11	1q23.3		NM_007348.4	HGNC:791	ATF6 works in concert with PERK in transactivating the CHOP gene and thus contributes to induction of those autophagy genes whose expression depends on CHOP. Therefore, activation of ATF6 during ER stress is also of importance for autophagy induction, vesicle nucleation, and elongation of the phagophore.
autophagy related 10	ATG10	NC_000005.10	5q14.1-q14.2		NM_001131028.2	HGNC:20315	E-2 like enzyme in ATG12 association with ATG5.
autophagy related 101	ATG101/c12orf44	NC_000012.12	12q13.13		NM_021934.5	HGNC:25679	Accountable for autophagy initiation and regulation; forms ULK-ATG13-ATG101-FIP200 complex by interacting with ATG13.
autophagy related 12	ATG12	NC_000005.10	5q22.3		NM_004707.4	HGNC:588	Ubiquitin like protein coupled to ATG5.
autophagy related 13	ATG13/KIAA0652	NC_000011.10	11p11.2		NM_014741.5	HGNC:29091	Participate in autophagy initiation and acts as a linker joining ULK1/2 and RB1CC1.
autophagy related 14	ATG14/KIAA0831	NC_000014.9	14q22.3		NM_014924.5	HGNC:19962	Associates with BECN1 and promote membrane targeting, curvature sensing and fusion.
autophagy related 16 like 1	ATG16L1	NC_000002.12	2q37.1		NM_017974.4	HGNC:21498	Part of E-3 like enzyme complex by linking to ATG5-ATG12.
autophagy related 16 like 2	ATG16L2	NC_000011.10	11q13.4		NM_033388.2	HGNC:25464	Part of E-3 like enzyme complex by linking to ATG5-ATG12.
autophagy related 2A	ATG2A	NC_000011.10	11q13.1		NM_015104.3	HGNC:29028	Expansion of autophagosome by recruiting ATG9.
autophagy related 2B	ATG2B	NC_000014.9	14q32.2		NM_018036.7	HGNC:20187	Expansion of autophagosome by recruiting ATG9.
autophagy related 3	ATG3	NC_000003.12	3q13.2		NM_022488.5	HGNC:20962	E-2 like enzyme essential for the lipidation of LC3.
autophagy related 4A cysteine peptidase	ATG4A	NC_000023.11	Xq22.3		NM_052936.5	HGNC:16489	Processing of LC3 and GABARAP at a lower rate.
autophagy related 4B cysteine peptidase	ATG4B	NC_000002.12	2q37.3		NM_013325.5	HGNC:20790	Chief enzyme required for processing all LC3 and GABARAP proteins and stabilizes the unlipidated GABARAPs.
autophagy related 4C cysteine peptidase	ATG4C	NC_000001.11	1p31.3		NM_032852.4	HGNC:16040	Processing of LC3 and GABARAP at a lower rate.
autophagy related 4D cysteine peptidase	ATG4D	NC_000019.10	19p13.2		NM_032885.6	HGNC:20789	Processing of LC3 and GABARAP at a lower rate.
autophagy related 5	ATG5	NC_000006.12	6q21		NM_004849.4	HGNC:589	Component of ATG12-ATG5 complex and associated in the formation of autophagosome; behaves as E-3 like enzyme required for LC3 lipidation.
autophagy related 7	ATG7	NC_000003.12	3p25.3		NM_006395.3	HGNC:16935	E-1 like enzyme which interacts with E-2 enzyme (ATG10/3); binds with ATG8 via thioester bond.
autophagy related 9A	ATG9A	NC_000002.12	2q35		NM_024085.5	HGNC:22408	Transmembrane protein essential for the formation of autophagosome.
autophagy related 9B	ATG9B	NC_000007.14	7q36.1		NR_133652.1	HGNC:21899	Transmembrane protein essential for the formation of autophagosome.
5-aminoimidazole-4-carboxamide ribonucleotide formyltransferase/IMP cyclohydrolase	ATIC	NC_000002.12	2q35		NM_004044.7	HGNC:794	ATIC, a 64-kDa bifunctional enzyme that catalyzes the last two steps of purine biosynthesis, can modulate the AMPK-mTOR-S6 K1-S6 pathway in HCC cell lines.
BCL2 associated athanogene	BAG1	NC_000009.12	9p13.3		NM_004323.6	HGNC:937	Co-chaperone for HSP70 and HSC70 chaperone proteins ; the protein encoded by this gene binds to BCL2, enhances its anti-apoptotic effects and represents a link between growth factor receptors and anti-apoptotic mechanisms. Bag-1 as a potential regulator of autophagic cell survival through Beclin 1 interaction. Our data suggested that Bag-1 indirectly forms a complex with Beclin 1 through at least…
BAG cochaperone 3	BAG3	NC_000010.11	10q26.11		NM_004281.4	HGNC:939	BAG proteins compete with Hip for binding to the Hsc70/Hsp70 ATPase domain and promote substrate release. By functionally interacting with HSP70 and LC3, BAG3 also delivers polyubiquitinated proteins to the autophagy pathway. BAG3 exerts a number of key physiological functions, including an involvement in cellular stress responses, proteostasis, cell death regulation, development, and cytoskeleta…
BCL2 antagonist/killer 1	BAK1	NC_000006.12	6p21.31		NM_001188.4	HGNC:949	BAK1 triggers both autophagy and apoptosis. BCL2 and its related family members bind directly to BECN1 to inhibit autophagy, and was supported by claims that BH3 mimetics induce autophagy in the absence of BAX and BAK1
BCL2 associated X	BAX	NC_000019.10	19q13.33		NM_138763.4	HGNC:959	BCL2 and its related family members bind directly to BECN1 to inhibit autophagy, and was supported by claims that BH3 mimetics induce autophagy in the absence of BAX and BAK1. A model suggests that autophagy is induced when the BCL2 family members are inhibited and release BAX and BAK1.
B-cell CLL/lymphoma 2	BCL2	NC_000018.10	18q21.33		NM_000633.3	HGNC:990	This gene encodes an integral outer mitochondrial membrane protein that blocks the apoptotic death of some cells such as lymphocytes. Under normal conditions, Bcl-2 inhibits BECN1, whereas under stress conditions, they dissociate. This allows BECN1 to interact with VPS34 and modulate autophagy. Bcl-2 can inhibit both autophagy- and apop-tosis-associated cell death. Bcl-2 binds to Bak/Bax, therefo…
BCL2 like 1	BCL2L1	NC_000020.11	20q11.21		NM_138578.3	HGNC:992	BCL2L1 can directly bind to a BH3-like domain of BECN1/Beclin 1 to inhibit autophagy.
beclin 1	BECN1	NC_000017.11	17q21.31		NM_003766.5	HGNC:1034	ATG14 recruitment; involved in membrane deformation and lipid binding.
beclin 2	BECN2	NC_000001.11	1q43		NM_001290693.1	HGNC:38606	Predicted to be part of phosphatidylinositol 3-kinase complex, class III, type I and phosphatidylinositol 3-kinase complex, class III, type II and active in phagophore assembly site.
BH3 interacting domain death agonist	BID	NC_000022.11	22q11.21		NM_197966.3	HGNC:1050	BID serves as a molecular switch between apoptosis and autophagy. BID knockdown resulted in strong suppression of CPT-induced apoptosis and a shift of cell death towards autophagy, manifesting with an increase of Beclin 1 and MAP1LC3 cellular contents.
baculoviral IAP repeat containing 5	BIRC5	NC_000017.11	17q25.3		NM_001168.3	HGNC:593	BIRC5 is a novel ATG12–ATG5 conjugate interactor that negatively regulates autophagy and suppresses autophagy-induced DNA damage in human cancer cells.
baculoviral IAP repeat containing 6	BIRC6	NC_000002.12	2p22.3		NM_016252.4	HGNC:13516	BIRC6 regulates autophagosome-lysosome fusion. BIRC6 is localized at lysosomal/autolysosomal membranes in cells. BIRC6 interacts with GABARAP (GAB) and GABARAPL1 (GL1) among LC3 family members, as well as STX17, which specifically localizes on mature autophagosomes
BCL2 interacting protein 1	BNIP1	NC_000005.10	5q35.1		NM_013979.3	HGNC:1082	BNIP1 regulates autophagy and lysosomal degradation.
BCL2 interacting protein 3	BNIP3	NC_000010.11	10q26.3		NM_004052.4	HGNC:1084	BNIP3 and NIX are proteins related to the BH3-only family, which induce both cell death and autophagy. Exposure of cells to H2O2 can upregulate the transcriptional expression of BNIP3, BNI3L through activation of HIF1, P53, FOXO3, NFKB, and NF2L2.
BCL2 interacting protein 3 like	BNIP3L	NC_000008.11	8p21.2		NM_004331.3	HGNC:1085	Exposure of cells to H2O2 can upregulate the transcriptional expression of BNI3L through activation of HIF1, P53, FOXO3, NFKB, and NF2L2.
calcium binding and coiled-coil domain 2	CALCOCO2	NC_000017.11	17q21.32		NM_005831.5	HGNC:29912	This gene encodes a coiled-coil domain-containing protein. The encoded protein functions as a receptor for ubiquitin-coated bacteria and plays an important role in innate immunity by mediating macroautophagy. CALCOCO2 plays a dual function during xenophagy first by targeting bacteria to nascent autophagosomes and then by promoting autophagosome maturation in order to destroy bacteria
calcium/calmodulin dependent protein kinase kinase 2	CAMKK2	NC_000012.12	12q24.31		NM_172226.3	HGNC:1470	CAMKK2 triggers AMPK phosphorylation and activation, and in turn phosphorylates ULK1 at serine 555, which ultimately stimulates autophagy independent of mTOR regulation.
calnexin	CANX	NC_000005.10	5q35.3		NM_001024649.2	HGNC:1473	This gene encodes a member of the calnexin family of molecular chaperones. The encoded protein is a calcium-binding, endoplasmic reticulum (ER)-associated protein that interacts transiently with newly synthesized N-linked glycoproteins, facilitating protein folding and assembly. It may also play a central role in the quality control of protein folding by retaining incorrectly folded protein subun…
calpain 1	CAPN1	NC_000011.10	11q13.1		NM_001198868.2	HGNC:1476	Inhibition of CAPN1 increased autophagosome formation by decreasing the cleavage of the autophagy regulators BECN1 (Beclin1) and ATG (autophagy-related gene) 5.
calpain 10	CAPN10	NC_000002.12	2q37.3		NM_023083.4	HGNC:1477	Calpains represent a ubiquitous, well-conserved family of calcium-dependent cysteine proteases. This gene encodes a large subunit. It is an atypical calpain in that it lacks the calmodulin-like calcium-binding domain and instead has a divergent C-terminal domain. It is similar in organization to calpains 5 and 6.
calpain 2	CAPN2	NC_000001.11	1q41		NM_001748.5	HGNC:1479	The calpains, calcium-activated neutral proteases, are nonlysosomal, intracellular cysteine proteases. The mammalian calpains include ubiquitous, stomach-specific, and muscle-specific proteins. The ubiquitous enzymes consist of heterodimers with distinct large, catalytic subunits associated with a common small, regulatory subunit. This gene encodes the large subunit of the ubiquitous enzyme, calp…
calpain small subunit 1	CAPNS1	NC_000019.10	19q13.12		NM_001003962.3	HGNC:1481	This encoded protein is essential for the stability and function of both calpain heterodimers, whose proteolytic activities influence various cellular functions including apoptosis, proliferation, migration, adhesion, and autophagy.
caspase 1	CASP1	NC_000011.10	11q22.3		NM_033292.4	HGNC:1499	CASP1 causes autophagy possibly due to upregulation of LC3, and Beclin-1 by unidentified mechanism 67.
caspase 3	CASP3	NC_000004.12	4q35.1		NM_004346.4	HGNC:1504	CASP3 downregulates autophagy by cleaving ATG5 and Beclin-1. May return C-terminal Beclin-1 fragment with pro-apoptotic properties.
caspase 4	CASP4	NC_000011.10	11q22.3		NM_001225.4	HGNC:1505	CASP4 causes autophagy possibly due to upregulation of LC3, and Beclin-1 by unidentified mechanism 67.
caspase 8	CASP8	NC_000002.12	2q33.1		NM_001228.4	HGNC:1509	Caspase-8 has been shown to prevent autophagy from over activation. Downregulates autophagy by cleaving ATG3, ATG5, and Beclin-1 during autophagosome assembly. May return C-terminal Beclin-1 fragment with pro-apoptotic properties.
C-C motif chemokine ligand 2	CCL2	NC_000017.11	17q12		NM_002982.4	HGNC:10618	CCL2 suppresses proapoptotic autophagy to promote chemoresistance. Drug resistant cancer cells secreted CCL2 to maintain or transduce drug resistance by activating PI3K-Akt-mTOR signaling pathway to suppress proapoptotic autophagy. CCL2 suppresses proapoptotic autophagy to promote chemoresistance. Drug resistant cancer cells secreted CCL2 to maintain or transduce drug resistance by activating PI3…
C-C motif chemokine receptor 2	CCR2	NC_000003.12	3p21.31		NM_001123041.3	HGNC:1603	Its binding with CCL2 on monocytes and macrophages mediates chemotaxis and migration induction through the activation of the PI3K cascade, the small G protein Rac and lamellipodium protrusion (Probable). Also acts as a receptor for the beta-defensin DEFB106A/DEFB106B
CD46 molecule	CD46	NC_000001.11	1q32.2		NM_172361.3	HGNC:6953	Two CD46-binding pathogens, induce autophagy through a CD46-Cyt-1/GOPC pathway.
cyclin dependent kinase inhibitor 1A	CDKN1A	NC_000006.12	6p21.2		NM_078467.3	HGNC:1784	This gene encodes a potent cyclin-dependent kinase inhibitor. The encoded protein binds to and inhibits the activity of cyclin-cyclin-dependent kinase2 or -cyclin-dependent kinase4 complexes, and thus functions as a regulator of cell cycle progression at G1. The expression of this gene is tightly controlled by the tumor suppressor protein p53, through which this protein mediates the p53-dependent…
cyclin dependent kinase inhibitor 1B	CDKN1B	NC_000012.12	12p13.1		NM_004064.5	HGNC:1785	CDKN1 may be regulated at the level of both expression and degradation in activated T cells. Taken together, the proliferation defect in autophagy-deficient T cells may be due to a degradation defect of CDKN1B and CDKN1, resulting in the incapacity of autophagy-deficient T cells to enter into S-phase.
cyclin dependent kinase inhibitor 2A	CDKN2A	NC_000009.12	9p21.3		NM_000077.5	HGNC:1787	Regulates DNA damage response in a dose-dependent manner through a number of signaling pathways involved in cell proliferation, apoptosis and senescence.
CASP8 and FADD like apoptosis regulator	CFLAR	NC_000002.12	2q33.1		NM_003879.7	HGNC:1876	Apoptosis regulator protein which may function as a crucial link between cell survival and cell death pathways in mammalian cells.
charged multivesicular body protein 2B	CHMP2B	NC_000003.12	3p11.2		NM_014043.4	HGNC:24537	Charged multivesicular body protein 2B (CHMP2B) – a component of the endosomal complex required for transport-III (ESCRT-III) – is responsible for the vital membrane deformation functions in autophagy and endolysosomal trafficking.
charged multivesicular body protein 4B	CHMP4B	NC_000020.11	20q11.22		NM_176812.5	HGNC:16171	CHMP4B is associated with both chromosome bridges and micronuclei and that autophagosomes and lysosomes accumulate around CHMP4B-positive micronuclei. This suggests that CHMP4B could mediate autophagolysosomal degradation of extranuclear chromatin
CLN3 lysosomal/endosomal transmembrane protein, battenin	CLN3	NC_000016.10	16p12.1		NM_000086.2	HGNC:2074	The loss of CLN3 function has been shown to cause early-stage abnormalities in autophagy, including an accumulation of autophagosomes and autolysosomes, even preceding detectable accumulation of lysosomal storage material
cathepsin B	CTSB	NC_000008.11	8p23.1		NM_147780.4	HGNC:2527	CTSB provides an apical signal controlling the expression of lysosomal and autophagy-related proteins as a way of maintaining the population and size of lysosomes and autophagosomes within a cell.
cathepsin D	CTSD	NC_000011.10	11p15.5		NM_001909.5	HGNC:2529	Autophagy triggers the maturation of CTSD to promote apoptosis.
cathepsin L	CTSL/CTSL1	NC_000009.12	9q21.33		NM_001912.5	HGNC:2537	The protein encoded by this gene is a lysosomal cysteine proteinase that plays a major role in intracellular protein catabolism. Its substrates include collagen and elastin, as well as alpha-1 protease inhibitor, a major controlling element of neutrophil elastase activity.
C-X3-C motif chemokine ligand 1	CX3CL1	NC_000016.10	16q21		NM_002996.6	HGNC:10647	Chemokine that acts as a ligand for both CX3CR1 and integrins ITGAV:ITGB3 and ITGA4:ITGB1
C-X-C motif chemokine receptor 4	CXCR4	NC_000002.12	2q22.1		NM_001008540.2	HGNC:2561	CXCR4 signaling in AML cells increases autophagic activity and decreases cytarabine-induced apoptosis.
death associated protein kinase 1	DAPK1	NC_000009.12	9q21.33		NM_004938.4	HGNC:2674	Death-associated protein kinase 1 is a positive mediator of gamma-interferon induced programmed cell death. DAPK1 encodes a structurally unique 160-kD calmodulin dependent serine-threonine kinase that carries 8 ankyrin repeats and 2 putative P-loop consensus sites.
death associated protein kinase 2	DAPK2	NC_000015.10	15q22.31		NM_014326.5	HGNC:2675	This gene encodes a protein that belongs to the serine/threonine protein kinase family. This protein contains a N-terminal protein kinase domain followed by a conserved calmodulin-binding domain with significant similarity to that of death-associated protein kinase 1 (DAPK1), a positive regulator of programmed cell death. Overexpression of this gene was shown to induce cell apoptosis.
DNA damage inducible transcript 3	DDIT3	NC_000012.12	12q13.3		NM_004083.6	HGNC:2726	The protein is activated by endoplasmic reticulum stress, and promotes autophagy and apoptosis.
DIRAS family GTPase 3	DIRAS3	NC_000001.11	1p31.3		NM_004675.5	HGNC:687	This gene is a member of the ras superfamily, and is expressed in normal ovarian and breast epithelial cells. It is a maternally imprinted gene and its expression is associated with growth suppression.
DLC1 Rho GTPase activating protein	DLC1	NC_000008.11	8p22		NM_182643.3	HGNC:2897	It is suggested that this gene is a candidate tumor suppressor gene for human liver cancer, as well as for prostate, lung, colorectal, and breast cancers.
DnaJ heat shock protein family (Hsp40) member B1	DNAJB1	NC_000019.10	19p13.12		NM_006145.3	HGNC:5270	This gene encodes a member of the DnaJ or Hsp40 (heat shock protein 40 kD) family of proteins. The encoded protein is a molecular chaperone that stimulates the ATPase activity of Hsp70 heat-shock proteins in order to promote protein folding and prevent misfolded protein aggregation.
DnaJ heat shock protein family (Hsp40) member B9	DNAJB9	NC_000007.14	7q31.1		NM_012328.3	HGNC:6968	This gene is a member of the type 2 subgroup of DnaJ proteins. The encoded protein is localized to the endoplasmic reticulum. This protein is induced by endoplasmic reticulum stress and plays a role in protecting stressed cells from apoptosis.
DNA damage regulated autophagy modulator 1	DRAM1	NC_000012.12	12q23.2		NM_018370.3	HGNC:25645	The gene encodes a lysosomal membrane protein that is required for the induction of autophagy by the pathway.
ER degradation enhancing alpha-mannosidase like protein 1	EDEM1	NC_000003.12	3p26.1		NM_014674.3	HGNC:18967	Enables mannosyl-oligosaccharide 1,2-alpha-mannosidase activity and misfolded protein binding activity. Involved in mannose trimming involved in glycoprotein ERAD pathway; positive regulation of retrograde protein transport, ER to cytosol; and protein targeting to ER.
eukaryotic translation elongation factor 2	EEF2	NC_000019.10	19p13.3		NM_001961.4	HGNC:3214	This gene encodes a member of the GTP-binding translation elongation factor family. It promotes the GTP-dependent translocation of the nascent protein chain from the A-site to the P-site of the ribosome.
eukaryotic elongation factor 2 kinase	EEF2K	NC_000016.10	16p12.2		NM_013302.5	HGNC:24615	It phosphorylates eukaryotic elongation factor 2 (EEF2) and thus inhibits the EEF2 function.
epidermal growth factor receptor	EGFR	NC_000007.14	7p11.2		NM_005228.5	HGNC:3236	EGFR is a cell surface protein that binds to epidermal growth factor. Binding of the protein to a ligand induces receptor dimerization and tyrosine autophosphorylation and leads to cell proliferation.
eukaryotic translation initiation factor 2 alpha kinase 2	EIF2AK2	NC_000002.12	2p22.2		NM_002759.4	HGNC:9437	The activated form of the encoded protein can phosphorylate translation initiation factor EIF2S1, which in turn inhibits protein synthesis.The encoded protein plays an important role in the innate immune response against multiple DNA and RNA viruses.
eukaryotic translation initiation factor 2 alpha kinase 3	EIF2AK3	NC_000002.12	2p11.2		NM_004836.7	HGNC:3255	This protein is thought to modulate mitochondrial function. It is a type I membrane protein located in the endoplasmic reticulum (ER), where it is induced by ER stress caused by malfolded proteins.
eukaryotic translation initiation factor 2 subunit alpha	EIF2S1	NC_000014.9	14q23.3		NM_004094.5	HGNC:3265	The translation initiation factor eIF2 catalyzes the first regulated step of protein synthesis initiation, promoting the binding of the initiator tRNA to 40S ribosomal subunits.
eukaryotic translation initiation factor 4E binding protein 1	EIF4EBP1	NC_000008.11	8p11.23		NM_004095.4	HGNC:3288	The protein directly interacts with eukaryotic translation initiation factor 4E (eIF4E), which is a limiting component of the multisubunit complex that recruits 40S ribosomal subunits to the 5' end of mRNAs. Interaction of this protein with eIF4E inhibits complex assembly and represses translation.
eukaryotic translation initiation factor 4 gamma 1	EIF4G1	NC_000003.12	3q27.1		NM_182917.4	HGNC:3296	The protein encoded by this gene is a component of the protein complex EIF4F, which is involved in the recognition of the mRNA cap, ATP-dependent unwinding of 5'-terminal secondary structure, and recruitment of mRNA to the ribosome.
erb-b2 receptor tyrosine kinase 2	ERBB2	NC_000017.11	17q12		NM_004448.4	HGNC:3430	This gene encodes a member of the epidermal growth factor (EGF) receptor family of receptor tyrosine kinases. This protein has no ligand binding domain of its own and therefore cannot bind growth factors. However, it does bind tightly to other ligand-bound EGF receptor family members to form a heterodimer, stabilizing ligand binding and enhancing kinase-mediated activation of downstream signallin…
endoplasmic reticulum to nucleus signaling 1	ERN1	NC_000017.11	17q23.3		NM_001433.5	HGNC:3449	The protein encoded by this gene is the ER to nucleus signalling 1 protein, a human homologue of the yeast Ire1 gene product. This protein possesses intrinsic kinase activity and an endoribonuclease activity and it is important in altering gene expression as a response to endoplasmic reticulum-based stress signals.
endoplasmic reticulum oxidoreductase 1 alpha	ERO1A/ERO1L	NC_000014.9	14q22.1		NM_014584.3	HGNC:13280	Enables oxidoreductase activity. Involved in chaperone cofactor-dependent protein refolding. Located in endoplasmic reticulum.
Fas associated via death domain	FADD	NC_000011.10	11q13.3		NM_003824.4	HGNC:3573	FADD has been used as a potential autophagy-related prognostic marker in lung squamous cell carcinoma and head and neck squamous cell carcinoma. The protein encoded by this gene is an adaptor molecule that interacts with various cell surface receptors and mediates cell apoptotic signals. Interaction of this protein with the receptors unmasks the N-terminal effector domain of this protein, which a…
family with sequence similarity 215 member A	FAM215A/c17orf88	NC_000017.11	17q21.31		NR_026770.1	HGNC:17505	FAM215A interacts with LAMP2 to protect it from ubiquitination.
Fas cell surface death receptor	FAS	NC_000010.11	10q23.31		NM_000043.6	HGNC:11920	The protein encoded by this gene is a member of the TNF-receptor superfamily. This receptor contains a death domain. The interaction of this receptor with its ligand allows the formation of a death-inducing signaling complex that includes Fas-associated death domain protein (FADD), caspase 8, and caspase 10.
FKBP prolyl isomerase 1A	FKBP1A	NC_000020.11	20p13		NM_000801.5	HGNC:3711	The protein encoded by this gene is a member of the immunophilin protein family, which play a role in immunoregulation and basic cellular processes involving protein folding and trafficking.
FKBP prolyl isomerase 1B	FKBP1B	NC_000002.12	2p23.3		NM_004116.5	HGNC:3712	The protein encoded by this gene is a member of the immunophilin protein family, which play a role in immunoregulation and basic cellular processes involving protein folding and trafficking.
Fos proto-oncogene, AP-1 transcription factor subunit	FOS	NC_000014.9	14q24.3		NM_005252.4	HGNC:3796	The Fos gene family consists of 4 members: FOS, FOSB, FOSL1, and FOSL2. These genes encode leucine zipper proteins that can dimerize with proteins of the JUN family. In some cases, expression of the FOS gene has also been associated with apoptotic cell death.
forkhead box O1	FOXO1	NC_000013.11	13q14.11		NM_002015.4	HGNC:3819	This gene belongs to the forkhead family of transcription factors which are characterized by a distinct forkhead domain. The specific function of this gene has not yet been determined; however, it may play a role in myogenic growth and differentiation.
forkhead box O3	FOXO3	NC_000006.12	6q21		NM_001455.4	HGNC:3821	FOXO3 is a transcription factor known to control the expression levels of multiple autophagy-related genes, including MLP3B and BNIP3, and binding of FOXO3 to the protein kinase ATM triggers autophosphorylation and activation of the latter protein ;activation of ATM triggers the initiation of a phosphorylation cascade that regulates the activity of various downstream targets, including AAPK and P…
alpha glucosidase	GAA	NC_000017.11	17q25.3		NM_000152.5	HGNC:4065	This gene encodes acid alpha-glucosidase, which is essential for the degradation of glycogen to glucose in lysosomes.
GABA type A receptor-associated protein	GABARAP	NC_000017.11	17p13.1		NM_007278.2	HGNC:4067	Ubiquitin-like module coupled to PE and used as a marker of autophagosome; recognition of adaptors specific to cargo.
GABA type A receptor associated protein like 1	GABARAPL1	NC_000012.12	12p13.2		NM_001363598.2	HGNC:4068	Ubiquitin-like module coupled to PE and used as a marker of autophagosome; recognition of adaptors specific to cargo.
GABA type A receptor associated protein like 2	GABARAPL2	NC_000016.10	16q23.1		NM_007285.7	HGNC:13291	Ubiquitin-like module coupled to PE and used as a marker of autophagosome; recognition of adaptors specific to cargo.
GABA type A receptor associated protein like 3 pseudogene	GABARAPL3	NC_000015.10	15q26.1		NR_028287.1	HGNC:4069	Ubiquitin-like modifier involved in autophagosome formation. Whereas LC3s are involved in elongation of the phagophore membrane, the GABARAP/GATE-16 subfamily is essential for a later stage in autophagosome maturation
glyceraldehyde-3-phosphate dehydrogenase	GAPDH	NC_000012.12	12p13.31		NM_002046.7	HGNC:4141	The product of this gene catalyzes an important energy-yielding step in carbohydrate metabolism, the reversible oxidative phosphorylation of glyceraldehyde-3-phosphate in the presence of inorganic phosphate and nicotinamide adenine dinucleotide (NAD).
G protein subunit alpha i3	GNAI3	NC_000001.11	1p13.3		NM_006496.4	HGNC:4387	Guanine nucleotide-binding proteins (G proteins) are involved as modulators or transducers in various transmembrane signaling pathways.
golgi associated PDZ and coiled-coil motif containing	GOPC	NC_000006.12	6q22.1		NM_020399.4	HGNC:17643	This gene encodes a Golgi protein with a PDZ domain. The PDZ domain is globular and proteins which contain them bind other proteins through short motifs near the C-termini.
glutamate ionotropic receptor delta type subunit 1	GRID1	NC_000010.11	10q23.1-q23.2		NM_017551.3	HGNC:4575	This gene encodes a subunit of glutamate receptor channels. These channels mediate most of the fast excitatory synaptic transmission in the central nervous system and play key roles in synaptic plasticity.
glutamate ionotropic receptor delta type subunit 2	GRID2	NC_000004.12	4q22.1-q22.2		NM_001286838.1	HGNC:4576	The protein encoded by this gene is a member of the family of ionotropic glutamate receptors which are the predominant excitatory neurotransmitter receptors in the mammalian brain
histone deacetylase 1	HDAC1	NC_000001.11	1p35.2-p35.1		NM_004964.3	HGNC:4852	The protein encoded by this gene belongs to the histone deacetylase/acuc/apha family and is a component of the histone deacetylase complex. It also interacts with retinoblastoma tumor-suppressor protein and this complex is a key element in the control of cell proliferation and differentiation. Together with metastasis-associated protein-2, it deacetylates p53 and modulates its effect on cell grow…
histone deacetylase 6	HDAC6	NC_000023.11	Xp11.23		NM_006044.4	HGNC:14064	The protein encoded by this gene belongs to class II of the histone deacetylase/acuc/apha family. This protein possesses histone deacetylase activity and represses transcription.
hepatocyte growth factor-regulated tyrosine kinase substrate	HGS	NC_000017.11	17q25.3		NM_004712.5	HGNC:4897	The protein encoded by this gene regulates endosomal sorting and plays a critical role in the recycling and degradation of membrane receptors. The encoded protein sorts monoubiquitinated membrane proteins into the multivesicular body, targeting these proteins for lysosome-dependent degradation.
hypoxia inducible factor 1 subunit alpha	HIF1A	NC_000014.9	14q23.2		NM_001530.4	HGNC:4910	Hypoxia-inducible factor-1 (HIF1) is a transcription factor found in mammalian cells cultured under reduced oxygen tension that plays an essential role in cellular and systemic homeostatic responses to hypoxia. Hypoxia can induce autophagy through activation of multiple oxygen-sensitive signaling pathways. One such pathway involves hypoxia-inducible factors (HIFs).
heat shock protein 90 alpha family class B member 1	HSP90AB1	NC_000006.12	6p21.1		NM_007355.4	HGNC:5258	Hsp90ab1 stabilized LRP5 to promote EMT via activating the AKT and Wnt/β-catenin signaling pathways.
heat shock protein family A (Hsp70) member 5	HSPA5	NC_000009.12	9q33.3		NM_005347.5	HGNC:5238	HSPA5 plays a crucial role in the clearance of aggregated proteins decorated with polyubiquitin through their interaction with SQSTM1/p62 (sequestosome 1) of stressed cells.
heat shock protein family A (Hsp70) member 8	HSPA8	NC_000011.10	11q24.1		NM_006597.6	HGNC:5241	HSPA8 is a crucial molecular regulator of chaperone-mediated autophagy, as a detector of substrates that will be processed by this specialized autophagy pathway.
heat shock protein family B (small) member 8	HSPB8	NC_000012.12	12q24.23		NM_014365.3	HGNC:30171	This protein functions as a chaperone in association with Bag3, a stimulator of macroautophagy.
interferon gamma	IFNG	NC_000012.12	12q15		NM_000619.3	HGNC:5438	IFN-γ induced autophagosome formation and conversion/turnover of microtubule associated protein 1 light chain 3 (LC3) protein.
inhibitor of nuclear factor kappa B kinase subunit beta	IKBKB	NC_000008.11	8p11.21		NM_001190720.3	HGNC:5960	IKKB has been implicated in the activation of mTOR and inhibition of autophagy
inhibitor of nuclear factor kappa B kinase subunit epsilon	IKBKE	NC_000001.11	1q32.1		NM_001193321.2	HGNC:14552	IKBKE is required for induction of autophagy by transforming PI3K-AKT-MTOR pathway commonly activated in breast cancer
interleukin 24	IL24	NC_000001.11	1q32.1		NM_006850.3	HGNC:11346	IL-24 induces a toxic form of autophagy in glioblastoma cells through PERK activation
immunity related GTPase M	IRGM	NC_000005.10	5q33.1		NM_001145805.2	HGNC:29597	The physical association of IRGM with mitochondria and different autophagy-regulating proteins, ATG5, ATG10, SH3GLB1, and LC3, contribute to explain how IRGM could regulate autophagy.
integrin subunit alpha 3	ITGA3	NC_000017.11	17q21.33		NM_005501.2	HGNC:6139	Integrin alpha 3 (ITGA3) belongs to the family of integrins, which are heterodimeric integral membrane proteins that function as cell surface adhesion molecules. This gene has been reported in several autophagy-related prognostic models for various tumors, indicating its important role in the progression of tumors
integrin subunit alpha 6	ITGA6	NC_000002.12	2q31.1		NM_000210.4	HGNC:6142	ITGA6 is a member of the integrins family. Many integrins contribute to tumor progression, and ITGA6 has been implicated in breast cancer progression
integrin subunit beta 1	ITGB1	NC_000010.11	10p11.22		NM_002211.4	HGNC:6153	The induction of autophagy, resulted from decreased ITGA3-ITGB1 function, functions as a key mediator of anoikis resistance in mammary epithelial cells during extracellular matrix detachment
integrin subunit beta 4	ITGB4	NC_000017.11	17q25.1		NM_000213.5	HGNC:6158	The induction of autophagy, resulted from decreased ITGA3-ITGB1 function, functions as a key mediator of anoikis resistance in mammary epithelial cells during extracellular matrix detachment
inositol 1,4,5-trisphosphate receptor type 1	ITPR1	NC_000003.12	3p26.1		NM_002222.7	HGNC:6180	ITPR1 induced the release of Ca2+ and promoted ATP synthesis in the non-starvation state, thereby inhibiting AMPK activity and inhibiting autophagy.
kinesin family member 5B	KIF5B	NC_000010.11	10p11.22		NM_004521.3	HGNC:6324	KIF5B may act as a cancer relevant lysosomal motor protein with additional functions in autophagosome formation.
kelch like family member 24	KLHL24	NC_000003.12	3q27.1		NM_017644.3	HGNC:25947	Klhl24 mRNA can be used to monitor autophagy in patients undergoing breast cancer therapy. Very recently Klhl24 has been identified as part of an autophagy related signature in acute myeloid leukemia
lysosomal associated membrane protein 1	LAMP1	NC_000013.11	13q34		NM_005561.4	HGNC:6499	LAMP1 is an autophagy factor that not only promotes invasive cell metastasis but also assists with other factors to reduce the susceptibility of some factors to induce lysosomal cell death and increase the development of drug resistance
lysosomal associated membrane protein 2	LAMP2	NC_000023.11	Xq24		NM_001122606.1	HGNC:6501	The LAMP2 gene provides instructions for making a protein called lysosomal associated membrane protein-2 (LAMP-2), which, as its name suggests, is found in the membrane of cellular structures called lysosomes. The LAMP-2 protein may be involved in the fusion between autophagic vacuoles and lysosomes.
microtubule associated protein 1 light chain 3 alpha	MAP1LC3A	NC_000020.11	20q11.22		NM_181509.3	HGNC:6838	Ubiquitin-like module coupled to PE and used as a marker of autophagosome; recognition of adaptors specific to cargo.
microtubule associated protein 1 light chain 3 beta	MAP1LC3B	NC_000016.10	16q24.2		NM_022818.5	HGNC:13352	Ubiquitin-like module coupled to PE and used as a marker of autophagosome; recognition of adaptors specific to cargo.
microtubule associated protein 1 light chain 3 gamma	MAP1LC3C	NC_000001.11	1q43		NM_001004343.3	HGNC:13353	Ubiquitin-like module coupled to PE and used as a marker of autophagosome; recognition of adaptors specific to cargo.
mitogen-activated protein kinase kinase 7	MAP2K7	NC_000019.10	19p13.2		NM_001297555.2	HGNC:6847	The protein encoded by this gene is a dual specificity protein kinase that belongs to the MAP kinase kinase family. This kinase is involved in the signal transduction mediating the cell responses to proinflammatory cytokines, and environmental stresses.
mitogen-activated protein kinase 1	MAPK1	NC_000022.11	22q11.22		NM_002745.5	HGNC:6871	The protein encoded by this gene is a member of the MAP kinase family. Upon activation, this kinase translocates to the nucleus of the stimulated cells, where it phosphorylates nuclear targets.
mitogen-activated protein kinase 3	MAPK3	NC_000016.10	16p11.2		NM_001040056.3	HGNC:6877	The protein encoded by this gene is a member of the MAP kinase family. Upon activation, this kinase translocates to the nucleus of the stimulated cells, where it phosphorylates nuclear targets.
mitogen-activated protein kinase 8	MAPK8	NC_000010.11	10q11.22		NM_001278547.2	HGNC:6881	The protein encoded by this gene is a member of the MAP kinase family. Upon activation, this kinase translocates to the nucleus of the stimulated cells, where it phosphorylates nuclear targets.
mitogen-activated protein kinase 8 interacting protein 1	MAPK8IP1	NC_000011.10	11p11.2		NM_005456.4	HGNC:6882	This protein has been shown to prevent MAPK8 mediated activation of transcription factors, and decrease IL-1 beta and MAP kinase kinase 1 (MEKK1) induced apoptosis in pancreatic beta cells.
mitogen-activated protein kinase 9	MAPK9	NC_000005.10	5q35.3		NM_001135044.2	HGNC:6886	It is most closely related to MAPK8, both of which are involved in UV radiation induced apoptosis, thought to be related to the cytochrome c-mediated cell death pathway. This gene and MAPK8 are also known as c-Jun N-terminal kinases. This kinase blocks the ubiquitination of tumor suppressor p53, and thus it increases the stability of p53 in nonstressed cells.
membrane bound transcription factor peptidase, site 2	MBTPS2	NC_000023.11	Xp22.12		NM_015884.4	HGNC:15455	This gene encodes a intramembrane zinc metalloprotease, which is essential in development. This protease functions in the signal protein activation involved in sterol control of transcription and the ER stress response.
MTOR associated protein, LST8 homolog	MLST8	NC_000016.10	16p13.3		NM_022372.6	HGNC:24825	Enables protein serine/threonine kinase activator activity. Involved in TORC1 signaling; positive regulation of TOR signaling; and regulation of actin cytoskeleton organization. Part of TORC1 complex and TORC2 complex.
myotubularin related protein 14	MTMR14	NC_000003.12	3p25.3		NM_022485.5	HGNC:26190	Myotubularin-related protein 14 (MTMR14), a member of the myotubularin (MTM)-related protein family, is a novel phosphoinositide phosphatase. MTMR14 is involved in the regulation of the aging process, normal muscle performance, and autophagy
mechanistic target of rapamycin kinase	MTOR	NC_000001.11	1p36.22		NM_004958.4	HGNC:3942	The protein encoded by this gene belongs to a family of phosphatidylinositol kinase-related kinases. These kinases mediate cellular responses to stresses such as DNA damage and nutrient deprivation. This protein acts as the target for the cell-cycle arrest and immunosuppressive effects of the FKBP12-rapamycin complex. exposure of cells to H2O2 can uppress mTORC1 activity through activation of ATM…
MYC proto-oncogene, bHLH transcription factor	MYC	NC_000008.11	8q24.21		NM_001354870.1	HGNC:7553	MYC suppresses the autophagy-lysosomal system by transcriptionally repressing genes that encode regulators and components of this pathway
nuclear assembly factor 1 ribonucleoprotein	NAF1	NC_000004.12	4q32.2		NM_138386.3	HGNC:25126	The protein, which is localized in both ER and in mitochondria, has been functionally implicated in cell autophagy, possibly as a mediator of Bcl-2 antagonism of Beclin-1 dependent autophagy on the surface of the ER
nicotinamide phosphoribosyltransferase	NAMPT	NC_000007.14	7q22.3		NM_182790.1	HGNC:30092	Nampt critically regulates NAD+ content, thereby playing an essential role in mediating cell survival by inhibiting apoptosis and stimulating autophagic flux
NBR1 autophagy cargo receptor	NBR1	NC_000017.11	17q21.31		NM_005899.5	HGNC:6746	NBR1 is an ATG8-interacting protein that binds ubiquitinated cargo and is degraded by autophagy. exogenous expression of NBR1, but not SQSTM, promotes peroxisome clustering and lysosome targeting
NCK associated protein 1	NCKAP1	NC_000002.12	2q32.1		NM_205842.3	HGNC:7666	Contributes to small GTPase binding activity. Involved in Rac protein signal transduction; positive regulation of Arp2/3 complex-mediated actin nucleation; and positive regulation of lamellipodium assembly.
NFE2 like bZIP transcription factor 2	NFE2L2	NC_000002.12	2q31.2		NM_006164.5	HGNC:7782	NFE2L2 plays a pivotal role in the regulation of the antioxidant response . Activation of the NFE2L2 pathway in astrocytes decreased the increase of ROS in neurons induced by autophagy impairment of astrocytes during oxidative stress.
nuclear factor kappa B subunit 1	NFKB1	NC_000004.12	4q24		NM_003998.4	HGNC:7794	It has been demonstrated that NF-Κβ (NFKB1) could trigger autophagy by directly inducing the expression of genes or proteins involved in the autophagosome machine, such as Beclin 1, BAG3-HspB8 complex, ATG5, and LC3
NK2 homeobox 3	NKX2-3	NC_000010.11	10q24.2		NM_145285.3	HGNC:7836	Nkx2-3 promoted autophagy in vascular smooth muscle cells by activating the AMP-activated protein kinase/mammalian target of rapamycin (AMPK/mTOR) signaling pathway.
NLR family CARD domain containing 4	NLRC4	NC_000002.12	2p22.3		NM_021209.4	HGNC:16412	NLRC4 associates with autophagic protein beclin 1/Atg6. Upon infection, PAMPs binding to NLRC4 release beclin 1 to induce autophagy.
NPC intracellular cholesterol transporter 1	NPC1	NC_000018.10	18q11.2		NM_000271.5	HGNC:7897	NPC1 in human fibroblasts causes increased spontaneous activation of the autophagic pathway. Progression of autophagy has been argued to be normal in NPC1.
nuclear receptor binding factor 2	NRBF2	NC_000010.11	10q21.3		NM_030759.5	HGNC:19692	A key role for NRBF2 in the assembly of the specific Atg14L-Beclin 1-Vps34-Vps15 complex for autophagy induction. Thus, NRBF2 modulates autophagy via regulation of PI3K-III and prevents ER stress-mediated cytotoxicity.
neuregulin 1	NRG1	NC_000008.11	8p12		NM_001159995.3	HGNC:7997	Neuregulin 1 (NRG1) was originally identified as a 44-kD glycoprotein that interacts with the NEU/ERBB2 receptor tyrosine kinase to increase its phosphorylation on tyrosine residues.Under conditions of stress, including viral infection, cytotoxic agents, and oxidative stress, activation of NRG-1/ErbB signaling can protect myocardial cells against apoptosis
neuregulin 2	NRG2	NC_000005.10	5q31.2		NM_013982.3	HGNC:7998	Neuregulin 2 (NRG2) is a novel member of the neuregulin family of growth and differentiation factors. Through interaction with the Erbb family of receptors, NRG2 induces the growth and differentiation of epithelial, neuronal, glial, and other types of cells. The gene consists of 12 exons and the genomic structure is similar to that of neuregulin 1 (NRG1), another member of the neuregulin family o…
neuregulin 3	NRG3	NC_000010.11	10q23.1		NM_001010848.4	HGNC:7999	NRG3 has been shown to activate the tyrosine phosphorylation of its cognate receptor, ERBB4, and is thought to influence neuroblast proliferation, migration and differentiation by signalling through ERBB4.The NRG3, in the larger neuregulin gene family, induces proliferation, migration, differentiation, and survival or apoptosis of cancer cells.
prolyl 4-hydroxylase subunit beta	P4HB	NC_000017.11	17q25.3		NM_000918.4	HGNC:8548	P4HB (Prolyl 4-hydroxylase, beta polypeptide) can act as a molecular chaperone to refine misfolded proteins in response to endoplasmic reticulum (ER) stress .P4HB may interact with ER stress related proteins such as HSP90B1, HSPA5 and PDIA6 to regulate autophagy in Kidney Renal Clear Cell Carcinoma (KIRC).
poly(ADP-ribose) polymerase 1	PARP1	NC_000001.11	1q42.12		NM_001618.4	HGNC:270	PARP1 could be activated by oxidative stress or other stresses and PARP1-mediated poly(ADP-ribosyl)ation is concerned with the progression of autophagy. PARP1-mediated poly(ADP-ribosyl)ation dissociated histone H1, promotes FoxO3a transactivation, leading to increased autophagy related-gene expression. PARP1 is a predominantly nuclear enzyme that converts NAD+ into poly(ADP-ribose), and hyperacti…
proliferation and apoptosis adaptor protein 15	PEA15	NC_000001.11	1q23.2		NM_003768.5	HGNC:8822	PEA15 is a death effector domain (DED)-containing protein predominantly expressed in the central nervous system, particularly in astrocytes. PEA-15 expression inhibits cell proliferation and induces autophagy.
proline, glutamate and leucine rich protein 1	PELP1	NC_000017.11	17p13.2		NM_014389.3	HGNC:30134	Proline-, glutamic acid–, and leucine-rich protein 1 (PELP1) is a novel estrogen receptor (ER) coregulatory protein that positively modulates ER transcriptional functions. PELP1 is also accumulated in the autophagosomes.
peroxisomal biogenesis factor 14	PEX14	NC_000001.11	1p36.22		NM_004565.3	HGNC:8856	PEX14 is a peroxisomal membrane protein that normally functions as a docking factor for cargo-loaded PEX5. Under conditions of starvation, where PEX5 is mostly cargo-unloaded, PEX14 can interact with LC3-II, thereby promoting peroxisome degradation. Starvation-induced pexophagy can be further enhanced by a PEX14-dependent recruitment of TNKS1/2 onto the peroxisomal membrane
peroxisomal biogenesis factor 3	PEX3	NC_000006.12	6q24.2		NM_003630.3	HGNC:8858	The crystal structure of human PEX3 has been determined with a peptide of PEX19 , elucidating the PEX3-PEX19 interaction region, which is likely similar in yeast based on a high degree of conservation of Pex3. Induction of pexophagy has been reported in mammalian cells by fusing ubiquitin moieties to PEX3 and PMP34
phosphatidylinositol 3-kinase catalytic subunit type 3	PIK3C3/VPS34	NC_000018.10	18q12.3		NM_002647.4	HGNC:8974	PIK3C3 can phosphorylate phosphatidylinositol (PtdIns) to generate phosphatidylinositol 3-phosphate (PI3P), a phospholipid central to autophagy. Inhibition of PIK3C3 successfully inhibits autophagy. The class III PtdIns3K catalytic subunit PIK3C3/Vps34 forms a protein complex with BECN1 and PIK3R4 and produces phosphatidylinositol 3-phosphate (PtdIns3P), which is required for the initiation and p…
phosphoinositide-3-kinase regulatory subunit 4	PIK3R4	NC_000003.12	3q22.1		NM_014602.3	HGNC:8982	Class III PtdIns3K forms large multi-subunit complexes with PIK3R4 as the regulatory subunit. The class III PtdIns3K catalytic subunit PIK3C3/Vps34 forms a protein complex with BECN1 and PIK3R4 and produces phosphatidylinositol 3-phosphate (PtdIns3P), which is required for the initiation and progression of autophagy.
PTEN induced kinase 1	PINK1	NC_000001.11	1p36.12		NM_032409.3	HGNC:14581	The role of PINK1 in the autophagic process has mainly focused on mitophagy, in which selective degradation of mitochondria occurs through the regulation of Parkin, an E3 ubiquitin ligase linked to PD. Upon dissipation of Δψm, PINK1 is localized to damaged mitochondria,15-18 driven by calcium-dependent gene expression.
protein phosphatase 1 regulatory subunit 15A	PPP1R15A	NC_000019.10	19q13.2		NM_014330.5	HGNC:14375	Plays an essential role in autophagy by tuning translation during starvation, thus enabling lysosomal biogenesis and a sustained autophagic flux
protein kinase AMP-activated non-catalytic subunit beta 1	PRKAB1	NC_000012.12	12q24.23		NM_006253.5	HGNC:9378	The protein encoded by this gene is a regulatory subunit of the AMP-activated protein kinase (AMPK). AMPK is a heterotrimer consisting of an alpha catalytic subunit, and non-catalytic beta and gamma subunits. AMPK is an important energy-sensing enzyme that monitors cellular energy status. Results suggest that AMPK association with ULK1 plays an important role in autophagy induction
protein kinase cAMP-dependent type I regulatory subunit alpha	PRKAR1A	NC_000017.11	17q24.2		NM_001276289.2	HGNC:9388	PRKAR1A is shown to regulate autophagy via association with mTOR kinase and colocalization with the autophagy marker proteins LC3B, Rab7 and Rab9
protein kinase C delta	PRKCD	NC_000003.12	3p21.1		NM_001316327.2	HGNC:9399	PKCD activates autophagy by promoting JNK1-mediated Bcl-2 phosphorylation and dissociation of the Bcl-2/Beclin 1 complex.
protein kinase C theta	PRKCQ	NC_000010.11	10p15.1		NM_006257.5	HGNC:9410	Protein kinase C (PKC) is a family of serine- and threonine-specific protein kinases that can be activated by calcium and the second messenger diacylglycerol. This kinase is important for T-cell activation. It is required for the activation of the transcription factors NF-kappaB and AP-1, and may link the T cell receptor (TCR) signaling complex to the activation of the transcription factors.
parkin RBR E3 ubiquitin protein ligase	PRKN/PARK2	NC_000006.12	6q26		NM_004562.3	HGNC:8607	The E3 ubiquitin ligase PARK2 and the mitochondrial protein kinase PINK1 are required for the initiation of mitochondrial damage-induced mitophagy. Together, PARK2 and PINK1 generate a phospho-ubiquitin signal on outer mitochondrial membrane proteins that triggers recruitment of the autophagy machinery.
phosphatase and tensin homolog	PTEN	NC_000010.11	10q23.31		NM_000314.8	HGNC:9588	PTEN, which is frequently mutated in glioblastomas, is a tumor suppressor gene that encodes a dual specificity phosphatase that antagonizes the phosphatidylinositol 3-kinase class I/AKT/mTOR pathway, which is a key regulator of autophagy.
protein tyrosine kinase 6	PTK6	NC_000020.11	20q13.33		NM_001256358.2	HGNC:9617	The protein encoded by this gene is a cytoplasmic nonreceptor protein kinase which may function as an intracellular signal transducer in epithelial tissues. The encoded protein has been shown to undergo autophosphorylation.
RAB11A, member RAS oncogene family	RAB11A	NC_000015.10	15q22.31		NM_001206836.2	HGNC:9760	Rab11 facilitates the fusion of endosomes and autophagosomes by removing Hook from mature late endosomes and inhibiting its homodimerization. Thus induction of autophagy appears to promote autophagic flux by increased convergence with the endosomal pathway.
RAB1A, member RAS oncogene family	RAB1A	NC_000002.12	2p14		NM_004161.5	HGNC:9758	Rab1A participate in autophagosome formation.
RAB24, member RAS oncogene family	RAB24	NC_000005.10	5q35.3		NM_130781.4	HGNC:9765	RAB24 is an atypical RAB protein that is required for the clearance of late autophagic vacuoles under basal conditions.
RAB33B, member RAS oncogene family	RAB33B	NC_000004.12	4q31.1		NM_031296.3	HGNC:16075	Autophagosome formation is regulated by Rab33B through the Atg12 conjugation system
RAB5A, member RAS oncogene family	RAB5A	NC_000003.12	3p24.3		NM_004162.5	HGNC:9783	RAB5 was found to be a regulator of the early steps of autophagosome formation. Similarly to its endosomal functions, RAB5 may have a role in the recruitment of the autophagic BECN1-PIK3C3 complex and subsequent PtdIns3P production on the phagophore membrane.
RAB7A, member RAS oncogene family	RAB7A	NC_000003.12	3q21.3		NM_004637.6	HGNC:9788	Rab7 regulates late endosome transport. The small GTPase, Rab7a, and the regulators of its GDP/GTP-binding status were shown to have roles in both endocytic membrane traffic and autophagy. Rab7a and its regulators are critical for the correct targeting of Atg9a-bearing vesicles to effect autophagosome formation around damaged mitochondria.
Rac family small GTPase 1	RAC1	NC_000007.14	7p22.1		NM_018890.4	HGNC:9801	Rac1 reduces autophagy flux by repressing the expressing of autophagy genes. Further investigation revealed that under nutrient-rich conditions, mammalian target of rapamycin (mTOR) phosphorylates TFEB to facilitate the interaction between Rac1 and TFEB
receptor for activated C kinase 1	RACK1/GNB2L1	NC_000005.10	5q35.3		NM_006098.5	HGNC:4399	RACK1 participates in the formation of autophagosome biogenesis complex upon its phosphorylation by AMPK at Thr50. Thr50 phosphorylation of RACK1 enhances its direct binding to Vps15, Atg14L, and Beclin 1, thereby promoting the assembly of the autophagy-initiation complex.
Raf-1 proto-oncogene, serine/threonine kinase	RAF1	NC_000003.12	3p25.2		NM_002880.4	HGNC:9829	Raf1 promotes resistance to apoptosis and autophagy in cancer cells, and enhances replicative immortality by regulating telomere maintenance. Raf1 has also been implicated in organ regeneration, therefore may induce angiogenesis, which is essential for tumor growth.
RB transcriptional corepressor 1	RB1	NC_000013.11	13q14.2		NM_000321.3	HGNC:9884	RB1 gene mutation reduces the level of autophagy by changing the expression of RB tumor repression proteins, thus inducing cell gene damage or cell death
RB1 inducible coiled-coil 1	RB1CC1/FIP200	NC_000008.11	8q11.23		NM_014781.5	HGNC:15574	RB1CC1 is a newly identified essential autophagy gene for maintaining protein homeostasis, attenuating autophagosome formation. Atg17-like region of human FIP200 bind to ATG13 and form a dimer with the N-termini protruding outwards, although the overall shape of the resulting dimers differs
RELA proto-oncogene, NF-kB subunit	RELA	NC_000011.10	11q13.1		NM_021975.4	HGNC:9955	RELA, or RELB (MIM 604758) to form the NFKB complex. The p50 (NFKB1)/p65 (RELA) heterodimer is the most abundant form of NFKB. The NFKB complex is inhibited by I-kappa-B proteins (NFKBIA, MIM 164008 or NFKBIB, MIM 604495), which inactivate NFKB by trapping it in the cytoplasm. Phosphorylation of serine residues on the I-kappa-B proteins by kinases (IKBKA, MIM 600664, or IKBKB, MIM 603258) marks t…
regulator of G protein signaling 19	RGS19	NC_000020.11	20q13.33		NM_005873.3	HGNC:13735	RGS19 and GNAI3 are engaged in controlling autophagy in human
Ras homolog, mTORC1 binding	RHEB	NC_000007.14	7q36.1		NM_005614.4	HGNC:10011	Rheb is inhibited in response to GD and prolonged ischemia, and inhibition of Rheb in turn inhibits mTORC1. Forced activation of Rheb in such conditions stimulates ATP depletion and ER stress by suppression of autophagy, thereby inducing cell death
ribosomal protein S6 kinase B1	RPS6KB1	NC_000017.11	17q23.1		NM_003161.4	HGNC:10436	RPS6KB1 is a serine/threonine kinase regulated by phosphoinositide 3-kinase (PI3K)/mammalian target of rapamycin (mTOR) pathway
regulatory associated protein of MTOR complex 1	RPTOR	NC_000017.11	17q25.3		NM_020761.3	HGNC:30287	This gene encodes a component of a signaling pathway that regulates cell growth in response to nutrient and insulin levels. The encoded protein forms a stoichiometric complex with the mTOR kinase
rubicon autophagy regulator	RUBCN/KIAA0226	NC_000003.12	3q29		NM_001145642.5	HGNC:28991	The protein encoded by this gene is a negative regulator of autophagy and endocytic trafficking and controls endosome maturation.
secretion associated Ras related GTPase 1A	SAR1A	NC_000010.11	10q22.1		NM_001142648.2	HGNC:10534	Predicted to enable GTPase activity. Involved in COPII-coated vesicle cargo loading. Part of COPII vesicle coat.
serpin family A member 1	SERPINA1	NC_000014.9	14q32.13		NM_001002235.3	HGNC:8941	SERPINA1 protein favored tumor cell growth and inhibit autophagy.
sestrin 2	SESN2	NC_000001.11	1p35.3		NM_031459.5	HGNC:20746	SESN2 is reported to be associated with oxidative stress-induced autophagy. TP53/p53 is defined as a major transcriptional regulator of SESN2 under DNA damage and oxidative stress.
SH3 domain containing GRB2 like, endophilin B1	SH3GLB1	NC_000001.11	1p22.3		NM_016009.5	HGNC:10833	SH3GLB1 can promote cell death by inducing apoptosis through Bax, or by redirecting to necrosis through autophagy and GSK3β inhibition
sirtuin 1	SIRT1	NC_000010.11	10q21.3		NM_012238.5	HGNC:14929	SIRT1, an NAD-dependent deacetylase, plays a role in regulation of autophagy. SIRT1 increases mitochondrial function and reduces oxidative stress, and has been linked to age-related reactive oxygen species (ROS) generation, which is highly dependent on mitochondrial metabolism.
sirtuin 2	SIRT2	NC_000019.10	19q13.2		NM_001193286.2	HGNC:10886	SIRT2 is a mechanical sensitive protein, and it regulates ASS induced cell apoptosis by modulating the release of exosomes and autophagy components.
sphingosine kinase 1	SPHK1	NC_000017.11	17q25.1		NM_182965.3	HGNC:11240	SphK1 facilitates endocytic trafficking. Inhibition of SphK1 with a lipid-based inhibitor or in the presence of sphingosine accumulates enlarged, dysfunctional late endosomes that impair autophagy. The autophagic machinery coordinates with lysosomal biogenesis to restore endocytic trafficking, thus highlighting crosstalk between autophagy, sphingolipids and endocytosis.
sphingolipid transporter 1 (putative)	SPNS1	NC_000016.10	16p11.2		NM_032038.3	HGNC:30621	The Spin/Spns1 defect induces aberrant autolysosome formation that leads to developmental senescence in the embryonic stage and premature aging symptoms in adulthood.
sequestosome 1	SQSTM1	NC_000005.10	5q35.3		NM_001142298.2	HGNC:11280	SQSTM increases the efficiency of NBR1-mediated pexophagy
ST13 Hsp70 interacting protein	ST13	NC_000022.11	22q13.2		NM_003932.5	HGNC:11343	The protein encoded by this gene is an adaptor protein that mediates the association of the heat shock proteins HSP70 and HSP90.
serine/threonine kinase 11	STK11	NC_000019.10	19p13.3		NM_000455.5	HGNC:11389	This gene, which encodes a member of the serine/threonine kinase family, regulates cell polarity and functions as a tumor suppressor. STK11 is important for initiating autophagy as STK11 silencing abrogates LC3B-II puncta, autophagosome/lysosome fusion and lysosomal activity.
SPT20 homolog, SAGA complex component	SUPT20H/FAM48A	NC_000013.11	13q13.3		NM_017569.4	HGNC:20596	Required for starvation-induced ATG9A trafficking during autophagy
TANK binding kinase 1	TBK1	NC_000012.12	12q14.2		NM_013254.4	HGNC:11584	TBK1 in mediating inflammation through macroautophagy/autophagy. While its function in inducing interferon production in response to viral infection has been extensively studied, its role in antiviral autophagy is only beginning to be appreciated
transmembrane 9 superfamily member 1	TM9SF1	NC_000014.9	14q12		NM_006405.7	HGNC:11864	TM9SF1 plays a key role in the regulation of cell autophagy. TM9SF1 overexpression induced high levels of autophagosome formation.
transmembrane protein 41B	TMEM41B	NC_000011.10	11p15.4		NM_001165030.3	HGNC:28948	TMEM41B is an integral endoplasmic reticulum (ER) membrane protein distantly related to the established autophagy factor vacuole membrane protein 1 (VMP1), and these two factors play related, albeit not fully overlapping, roles in autophagosome biogenesis.
transmembrane protein 74	TMEM74	NC_000008.11	8q23.1		NM_153015.3	HGNC:26409	TMEM74 promotes tumor cell survival by inducing autophagy via interactions with ATG16L1 and ATG9A.
TNF superfamily member 10	TNFSF10	NC_000003.12	3q26		NM_001190942.2	HGNC:11925	The protein encoded by this gene is a cytokine that belongs to the tumor necrosis factor (TNF) ligand family. This protein preferentially induces apoptosis in transformed and tumor cells, but does not appear to kill normal cells although it is expressed at a significant level in most normal tissues. This protein binds to several members of TNF receptor superfamily
tumor protein p53	TP53	NC_000017.11	17p13.1		NM_000546.6	HGNC:11998	Autophagy suppresses p53 and also p53 activates autophagy. The suppression of p53 by autophagy is important for tumor promotion and likely also for preventing tissue degeneration. Alternatively, the activation of autophagy by p53 suggests that autophagy is part of the protective function of p53.
tumor protein p53 inducible nuclear protein 2	TP53INP2	NC_000020.11	20q11.22		NM_021202.3	HGNC:16104	By acting as a nutrient status sensor, TP53INP2 switches its role between transcription and autophagy by changing its subcellular localization and helps the cell to cope with environmental changes.
tumor protein p63	TP63	NC_000003.12	3q28		NM_003722.5	HGNC:15979	TP63 acts as one of the autophagy-related genes (ARGs) in breast cancer.
tumor protein p73	TP73	NC_000001.11	1p36.32		NM_005427.4	HGNC:12003	TP73/p73 deficiency, promotes autophagy in CSLCs by activating the autophagy machinery involving AMPK-TSC-MTOR signaling. Mechanistically, TP73/p73 deficiency-induced autophagy occurs as a result of reduced ATP levels resulting from the metabolic perturbations within the proline regulatory axis.
TSC complex subunit 1	TSC1	NC_000009.12	9q34		NM_000368.5	HGNC:12362	Tuberous sclerosis complex (TSC) is an autosomal dominant genetic disorder caused by germline mutations in TSC1 or TSC2 genes, which leads to the hyperactivation of the mTORC1 pathway, an important negative regulator of autophagy.
TSC complex subunit 2	TSC2	NC_000016.10	16p13.3		NM_000548.5	HGNC:12363	Tuberous sclerosis complex (TSC) is an autosomal dominant genetic disorder caused by germline mutations in TSC1 or TSC2 genes, which leads to the hyperactivation of the mTORC1 pathway, an important negative regulator of autophagy.
tumor suppressor candidate 1	TUSC1	NC_000009.12	9p21.2		NM_001004125.3	HGNC:31010	TUSC1 tumor suppressor candidate 1 (TUSC1) is a putative tumor suppressor gene. This gene is located within the region of chromosome 9p that harbors tumor suppressor genes critical in carcinogenesis.
unc-51 like autophagy activating kinase 1	ULK1	NC_000012.12	12q24.33		NM_003565.4	HGNC:12558	Initiation and regulation of autophagy.
unc-51 like autophagy activating kinase 2	ULK2	NC_000017.11	17p11.2		NM_014683.4	HGNC:13480	Initiation and regulation of autophagy.
unc-51 like kinase 3	ULK3	NC_000015.10	15q24.1		NM_015518.1	HGNC:19703	Serine/threonine protein kinase that acts as a regulator of Sonic hedgehog (SHH) signaling and autophagy.
ubiquitin specific peptidase 10	USP10	NC_000016.10	16q24.1		NM_001272075.2	HGNC:12608	USP10 has also been shown to enhance autophagy by deubiquitinating beclin-1, a component of class-III PI3K complexes that catalyze the formation of phosphatidylinositol 3-phosphate at both autophagy initiation and autophagosome maturation steps
UV radiation resistance associated	UVRAG	NC_000011.10	11q13.5		NM_003369.4	HGNC:12640	This gene complements the ultraviolet sensitivity of xeroderma pigmentosum group C cells and encodes a protein with a C2 domain. The protein activates the Beclin1-PI(3)KC3 complex, promoting autophagy and suppressing the proliferation and tumorigenicity of human colon cancer cells.
vesicle associated membrane protein 3	VAMP3	NC_000001.11	1p36.23		NM_004781.4	HGNC:12644	VAMP3 regulates amphisome formation by controlling the fusion between multivesicular bodies and autophagosomes and participates in autophagy by the fusion of ATG9-containing vesicles.
vesicle associated membrane protein 7	VAMP7	NC_000023.11/NC_000024.10	Xq28 and Yq12		NM_005638.6	HGNC:11486	VAMP7 is required for autophagosome biogenesis and lysosome fusion events.
vascular endothelial growth factor A	VEGFA	NC_000006.12	6p21.1		NM_001025366.3	HGNC:12680	VEGF/AMPK pathway regulates autophagy in endothelial cells and stimulates autophagy, contributes to the pro-angiogenic function of this pathway. VEGF leads to transient induction of autophagy in endothelial cells via sequential activation of AMPK and mTOR pathways leading to consecutive phosphorylation of ULK1 at activating (S556) and inhibiting (S758) sites.
vacuole membrane protein 1	VMP1/TMEM49	NC_000017.11	17q23.1		NM_030938.5	HGNC:29559	Required for autophagosome formation: participates in early stages of autophagosome biogenesis at the endoplasmic reticulum (ER) membrane by reequilibrating the leaflets of the ER as lipids are extracted by ATG2 (ATG2A or ATG2B) to mediate autophagosome assembly
WD repeat and FYVE domain containing 3	WDFY3	NC_000004.12	4q21.23		NM_014991.6	HGNC:20751	Required for selective macroautophagy . Acts as an adapter protein by linking specific proteins destined for degradation to the core autophagic machinery members, such as the ATG5-ATG12-ATG16L E3-like ligase, SQSTM1 and LC3.
WD repeat domain 45	WDR45	NC_000023.11	Xp11.23		NM_007075.4	HGNC:28912	Along with p62/SQSTM1, involved in the formation and autophagic degradation of cytoplasmic ubiquitin-containing inclusions (p62 bodies, ALIS/aggresome-like induced structures). Along with SQSTM1, required to recruit ubiquitinated proteins to PML bodies in the nucleus
WD repeat domain 45B	WDR45B/WDR45L	NC_000017.11	17q25.3		NM_019613.4	HGNC:25072	Component of the autophagy machinery that controls the major intracellular degradation process by which cytoplasmic materials are packaged into autophagosomes and delivered to lysosomes for degradation. Binds phosphatidylinositol 3-phosphate (PtdIns3P), and other phosphoinositides including PtdIns(3,5)P2, forming on membranes of the endoplasmic reticulum upon activation of the upstream ULK1 and P…
WD repeat domain, phosphoinositide interacting 1	WIPI1	NC_000017.11	17q24.2		NM_017983.7	HGNC:25471	Component of the autophagy machinery that controls the major intracellular degradation process by which cytoplasmic materials are packaged into autophagosomes and delivered to lysosomes for degradation. Binds phosphatidylinositol 3-phosphate (PtdIns3P), and maybe other phosphoinositides including PtdIns3,5P2 and PtdIns5P, and is recruited to phagophore assembly sites at the endoplasmic reticulum …
WD repeat domain, phosphoinositide interacting 2	WIPI2	NC_000007.14	7p22.1		NM_015610.4	HGNC:32225	Component of the autophagy machinery that controls the major intracellular degradation process by which cytoplasmic materials are packaged into autophagosomes and delivered to lysosomes for degradation. Once activated, WIPI2 recruits at phagophore assembly sites the ATG12-ATG5-ATG16L1 complex that directly controls the elongation of the nascent autophagosomal membrane.
zinc finger FYVE-type containing 1	ZFYVE1	NC_000014.9	14q24.2		NM_021260.4	HGNC:13180	Binds to phosphatidylinositol 3-phosphate (PtdIns3P) through FYVE-type zinc finger

## Sheet: Sheet2
Supplementary Table S1. List of genes involved in human autophagy and their respective roles.
Sl No	ATGs	Gene Acronym	NCBI Gene Accession no.	NCBI RefSeq ID	HGNC ID	Chromosome Location	Role In Autophagy
1	autophagy and beclin 1 regulator 1	AMBRA1	NC_000011.10	NM_017749.3	HGNC:25990	11p11.2	Acts as a key regulator of autophagy by modulating the BECN1-PIK3C3 complex
2	apolipoprotein L1	APOL1	NC_000022.11	NM_145343.3	HGNC:618	22q12.3	ApoL1 induces autophagy ; directly or indirectly, activates the translocation of LC3-II to the autophagosomes
3	aryl hydrocarbon receptor nuclear translocator	ARNT	NC_000001.11	NM_001197325.2	HGNC:700	1q21.3	The encoded protein by this gene has been identified as the beta subunit of a heterodimeric transcription factor, hypoxia-inducible factor 1 (HIF1). A t(1;12)(q21;p13) translocation, which results in a TEL-ARNT fusion protein, is associated with acute myeloblastic leukemia.
4	arylsulfatase A	ARSA	NC_000022.11	NM_000487.6	HGNC:713	22q13.33	Arylsulfatase may control melanoma progression ; ARSA, the arylsulfatase A gene, appears to mediate BAG1, PEX3, and WIPI1 interaction with melanoma
5	arylsulfatase B	ARSB	NC_000005.10	NM_000046.5	HGNC:714	5q14.1	Arylsulfatase B is targetted to the lysozyme. Mucopolysaccharidosis type VI is an autosomal recessive lysosomal storage disorder resulting from a deficiency of arylsulfatase B.
6	activating transcription factor 4	ATF4	NC_000022.11	NM_001675.4	HGNC:786	22q13.1	ATF4 facilitates autophagy through direct binding to a cyclic AMP response element binding site in the LC3B promoter, resulting in LC3B upregulation
7	activating transcription factor 6	ATF6	NC_000001.11	NM_007348.4	HGNC:791	1q23.3	ATF6 works in concert with PERK in transactivating the CHOP gene and thus contributes to induction of those autophagy genes whose expression depends on CHOP. Therefore, activation of ATF6 during ER stress is also of importance for autophagy induction, vesicle nucleation, and elongation of the phagophore.
8	autophagy related 10	ATG10	NC_000005.10	NM_001131028.2	HGNC:20315	5q14.1-q14.2	E-2 like enzyme in ATG12 association with ATG5.
9	autophagy related 101	ATG101/c12orf44	NC_000012.12	NM_021934.5	HGNC:25679	12q13.13	Accountable for autophagy initiation and regulation; forms ULK-ATG13-ATG101-FIP200 complex by interacting with ATG13.
10	autophagy related 12	ATG12	NC_000005.10	NM_004707.4	HGNC:588	5q22.3	Ubiquitin like protein coupled to ATG5.
11	autophagy related 13	ATG13/KIAA0652	NC_000011.10	NM_014741.5	HGNC:29091	11p11.2	Participate in autophagy initiation and acts as a linker joining ULK1/2 and RB1CC1.
12	autophagy related 14	ATG14/KIAA0831	NC_000014.9	NM_014924.5	HGNC:19962	14q22.3	Associates with BECN1 and promote membrane targeting, curvature sensing and fusion.
13	autophagy related 16 like 1	ATG16L1	NC_000002.12	NM_017974.4	HGNC:21498	2q37.1	Part of E-3 like enzyme complex by linking to ATG5-ATG12.
14	autophagy related 16 like 2	ATG16L2	NC_000011.10	NM_033388.2	HGNC:25464	11q13.4	Part of E-3 like enzyme complex by linking to ATG5-ATG12.
15	autophagy related 2A	ATG2A	NC_000011.10	NM_015104.3	HGNC:29028	11q13.1	Expansion of autophagosome by recruiting ATG9.
16	autophagy related 2B	ATG2B	NC_000014.9	NM_018036.7	HGNC:20187	14q32.2	Expansion of autophagosome by recruiting ATG9.
17	autophagy related 3	ATG3	NC_000003.12	NM_022488.5	HGNC:20962	3q13.2	E-2 like enzyme essential for the lipidation of LC3.
18	autophagy related 4A cysteine peptidase	ATG4A	NC_000023.11	NM_052936.5	HGNC:16489	Xq22.3	Processing of LC3 and GABARAP at a lower rate.
19	autophagy related 4B cysteine peptidase	ATG4B	NC_000002.12	NM_013325.5	HGNC:20790	2q37.3	Chief enzyme required for processing all LC3 and GABARAP proteins and stabilizes the unlipidated GABARAPs.
20	autophagy related 4C cysteine peptidase	ATG4C	NC_000001.11	NM_032852.4	HGNC:16040	1p31.3	Processing of LC3 and GABARAP at a lower rate.
21	autophagy related 4D cysteine peptidase	ATG4D	NC_000019.10	NM_032885.6	HGNC:20789	19p13.2	Processing of LC3 and GABARAP at a lower rate.
22	autophagy related 5	ATG5	NC_000006.12	NM_004849.4	HGNC:589	6q21	Component of ATG12-ATG5 complex and associated in the formation of autophagosome; behaves as E-3 like enzyme required for LC3 lipidation.
23	autophagy related 7	ATG7	NC_000003.12	NM_006395.3	HGNC:16935	3p25.3	E-1 like enzyme which interacts with E-2 enzyme (ATG10/3); binds with ATG8 via thioester bond.
24	autophagy related 9A	ATG9A	NC_000002.12	NM_024085.5	HGNC:22408	2q35	Transmembrane protein essential for the formation of autophagosome.
25	autophagy related 9B	ATG9B	NC_000007.14	NR_133652.1	HGNC:21899	7q36.1	Transmembrane protein essential for the formation of autophagosome.
26	5-aminoimidazole-4-carboxamide ribonucleotide formyltransferase/IMP cyclohydrolase	ATIC	NC_000002.12	NM_004044.7	HGNC:794	2q35	ATIC, a 64-kDa bifunctional enzyme that catalyzes the last two steps of purine biosynthesis, can modulate the AMPK-mTOR-S6 K1-S6 pathway in HCC cell lines.
27	BCL2 associated athanogene	BAG1	NC_000009.12	NM_004323.6	HGNC:937	9p13.3	Co-chaperone for HSP70 and HSC70 chaperone proteins ; the protein encoded by this gene binds to BCL2, enhances its anti-apoptotic effects and represents a link between growth factor receptors and anti-apoptotic mechanisms. Bag-1 as a potential regulator of autophagic cell survival through Beclin 1 interaction. Our data suggested that Bag-1 indirectly forms a complex with Beclin 1 through at least…
28	BAG cochaperone 3	BAG3	NC_000010.11	NM_004281.4	HGNC:939	10q26.11	BAG proteins compete with Hip for binding to the Hsc70/Hsp70 ATPase domain and promote substrate release. By functionally interacting with HSP70 and LC3, BAG3 also delivers polyubiquitinated proteins to the autophagy pathway. BAG3 exerts a number of key physiological functions, including an involvement in cellular stress responses, proteostasis, cell death regulation, development, and cytoskeleta…
29	BCL2 antagonist/killer 1	BAK1	NC_000006.12	NM_001188.4	HGNC:949	6p21.31	BAK1 triggers both autophagy and apoptosis. BCL2 and its related family members bind directly to BECN1 to inhibit autophagy, and was supported by claims that BH3 mimetics induce autophagy in the absence of BAX and BAK1
30	BCL2 associated X	BAX	NC_000019.10	NM_138763.4	HGNC:959	19q13.33	BCL2 and its related family members bind directly to BECN1 to inhibit autophagy, and was supported by claims that BH3 mimetics induce autophagy in the absence of BAX and BAK1. A model suggests that autophagy is induced when the BCL2 family members are inhibited and release BAX and BAK1.
31	B-cell CLL/lymphoma 2	BCL2	NC_000018.10	NM_000633.3	HGNC:990	18q21.33	This gene encodes an integral outer mitochondrial membrane protein that blocks the apoptotic death of some cells such as lymphocytes. Under normal conditions, Bcl-2 inhibits BECN1, whereas under stress conditions, they dissociate. This allows BECN1 to interact with VPS34 and modulate autophagy. Bcl-2 can inhibit both autophagy- and apop-tosis-associated cell death. Bcl-2 binds to Bak/Bax, therefo…
32	BCL2 like 1	BCL2L1	NC_000020.11	NM_138578.3	HGNC:992	20q11.21	BCL2L1 can directly bind to a BH3-like domain of BECN1/Beclin 1 to inhibit autophagy.
33	beclin 1	BECN1	NC_000017.11	NM_003766.5	HGNC:1034	17q21.31	ATG14 recruitment; involved in membrane deformation and lipid binding.
34	beclin 2	BECN2	NC_000001.11	NM_001290693.1	HGNC:38606	1q43	Predicted to be part of phosphatidylinositol 3-kinase complex, class III, type I and phosphatidylinositol 3-kinase complex, class III, type II and active in phagophore assembly site.
35	BH3 interacting domain death agonist	BID	NC_000022.11	NM_197966.3	HGNC:1050	22q11.21	BID serves as a molecular switch between apoptosis and autophagy. BID knockdown resulted in strong suppression of CPT-induced apoptosis and a shift of cell death towards autophagy, manifesting with an increase of Beclin 1 and MAP1LC3 cellular contents.
36	baculoviral IAP repeat containing 5	BIRC5	NC_000017.11	NM_001168.3	HGNC:593	17q25.3	BIRC5 is a novel ATG12–ATG5 conjugate interactor that negatively regulates autophagy and suppresses autophagy-induced DNA damage in human cancer cells.
37	baculoviral IAP repeat containing 6	BIRC6	NC_000002.12	NM_016252.4	HGNC:13516	2p22.3	BIRC6 regulates autophagosome-lysosome fusion. BIRC6 is localized at lysosomal/autolysosomal membranes in cells. BIRC6 interacts with GABARAP (GAB) and GABARAPL1 (GL1) among LC3 family members, as well as STX17, which specifically localizes on mature autophagosomes
38	BCL2 interacting protein 1	BNIP1	NC_000005.10	NM_013979.3	HGNC:1082	5q35.1	BNIP1 regulates autophagy and lysosomal degradation.
39	BCL2 interacting protein 3	BNIP3	NC_000010.11	NM_004052.4	HGNC:1084	10q26.3	BNIP3 and NIX are proteins related to the BH3-only family, which induce both cell death and autophagy. Exposure of cells to H2O2 can upregulate the transcriptional expression of BNIP3, BNI3L through activation of HIF1, P53, FOXO3, NFKB, and NF2L2.
40	BCL2 interacting protein 3 like	BNIP3L	NC_000008.11	NM_004331.3	HGNC:1085	8p21.2	Exposure of cells to H2O2 can upregulate the transcriptional expression of BNI3L through activation of HIF1, P53, FOXO3, NFKB, and NF2L2.
41	calcium binding and coiled-coil domain 2	CALCOCO2	NC_000017.11	NM_005831.5	HGNC:29912	17q21.32	This gene encodes a coiled-coil domain-containing protein. The encoded protein functions as a receptor for ubiquitin-coated bacteria and plays an important role in innate immunity by mediating macroautophagy. CALCOCO2 plays a dual function during xenophagy first by targeting bacteria to nascent autophagosomes and then by promoting autophagosome maturation in order to destroy bacteria
42	calcium/calmodulin dependent protein kinase kinase 2	CAMKK2	NC_000012.12	NM_172226.3	HGNC:1470	12q24.31	CAMKK2 triggers AMPK phosphorylation and activation, and in turn phosphorylates ULK1 at serine 555, which ultimately stimulates autophagy independent of mTOR regulation.
43	calnexin	CANX	NC_000005.10	NM_001024649.2	HGNC:1473	5q35.3	This gene encodes a member of the calnexin family of molecular chaperones. The encoded protein is a calcium-binding, endoplasmic reticulum (ER)-associated protein that interacts transiently with newly synthesized N-linked glycoproteins, facilitating protein folding and assembly. It may also play a central role in the quality control of protein folding by retaining incorrectly folded protein subun…
44	calpain 1	CAPN1	NC_000011.10	NM_001198868.2	HGNC:1476	11q13.1	Inhibition of CAPN1 increased autophagosome formation by decreasing the cleavage of the autophagy regulators BECN1 (Beclin1) and ATG (autophagy-related gene) 5.
45	calpain 10	CAPN10	NC_000002.12	NM_023083.4	HGNC:1477	2q37.3	Calpains represent a ubiquitous, well-conserved family of calcium-dependent cysteine proteases. This gene encodes a large subunit. It is an atypical calpain in that it lacks the calmodulin-like calcium-binding domain and instead has a divergent C-terminal domain. It is similar in organization to calpains 5 and 6.
46	calpain 2	CAPN2	NC_000001.11	NM_001748.5	HGNC:1479	1q41	The calpains, calcium-activated neutral proteases, are nonlysosomal, intracellular cysteine proteases. The mammalian calpains include ubiquitous, stomach-specific, and muscle-specific proteins. The ubiquitous enzymes consist of heterodimers with distinct large, catalytic subunits associated with a common small, regulatory subunit. This gene encodes the large subunit of the ubiquitous enzyme, calp…
47	calpain small subunit 1	CAPNS1	NC_000019.10	NM_001003962.3	HGNC:1481	19q13.12	This encoded protein is essential for the stability and function of both calpain heterodimers, whose proteolytic activities influence various cellular functions including apoptosis, proliferation, migration, adhesion, and autophagy.
48	caspase 1	CASP1	NC_000011.10	NM_033292.4	HGNC:1499	11q22.3	CASP1 causes autophagy possibly due to upregulation of LC3, and Beclin-1 by unidentified mechanism 67.
49	caspase 3	CASP3	NC_000004.12	NM_004346.4	HGNC:1504	4q35.1	CASP3 downregulates autophagy by cleaving ATG5 and Beclin-1. May return C-terminal Beclin-1 fragment with pro-apoptotic properties.
50	caspase 4	CASP4	NC_000011.10	NM_001225.4	HGNC:1505	11q22.3	CASP4 causes autophagy possibly due to upregulation of LC3, and Beclin-1 by unidentified mechanism 67.
51	caspase 8	CASP8	NC_000002.12	NM_001228.4	HGNC:1509	2q33.1	Caspase-8 has been shown to prevent autophagy from over activation. Downregulates autophagy by cleaving ATG3, ATG5, and Beclin-1 during autophagosome assembly. May return C-terminal Beclin-1 fragment with pro-apoptotic properties.
52	C-C motif chemokine ligand 2	CCL2	NC_000017.11	NM_002982.4	HGNC:10618	17q12	CCL2 suppresses proapoptotic autophagy to promote chemoresistance. Drug resistant cancer cells secreted CCL2 to maintain or transduce drug resistance by activating PI3K-Akt-mTOR signaling pathway to suppress proapoptotic autophagy. CCL2 suppresses proapoptotic autophagy to promote chemoresistance. Drug resistant cancer cells secreted CCL2 to maintain or transduce drug resistance by activating PI3…
53	C-C motif chemokine receptor 2	CCR2	NC_000003.12	NM_001123041.3	HGNC:1603	3p21.31	Its binding with CCL2 on monocytes and macrophages mediates chemotaxis and migration induction through the activation of the PI3K cascade, the small G protein Rac and lamellipodium protrusion (Probable). Also acts as a receptor for the beta-defensin DEFB106A/DEFB106B
54	CD46 molecule	CD46	NC_000001.11	NM_172361.3	HGNC:6953	1q32.2	Two CD46-binding pathogens, induce autophagy through a CD46-Cyt-1/GOPC pathway.
55	cyclin dependent kinase inhibitor 1A	CDKN1A	NC_000006.12	NM_078467.3	HGNC:1784	6p21.2	This gene encodes a potent cyclin-dependent kinase inhibitor. The encoded protein binds to and inhibits the activity of cyclin-cyclin-dependent kinase2 or -cyclin-dependent kinase4 complexes, and thus functions as a regulator of cell cycle progression at G1. The expression of this gene is tightly controlled by the tumor suppressor protein p53, through which this protein mediates the p53-dependent…
56	cyclin dependent kinase inhibitor 1B	CDKN1B	NC_000012.12	NM_004064.5	HGNC:1785	12p13.1	CDKN1 may be regulated at the level of both expression and degradation in activated T cells. Taken together, the proliferation defect in autophagy-deficient T cells may be due to a degradation defect of CDKN1B and CDKN1, resulting in the incapacity of autophagy-deficient T cells to enter into S-phase.
57	cyclin dependent kinase inhibitor 2A	CDKN2A	NC_000009.12	NM_000077.5	HGNC:1787	9p21.3	Regulates DNA damage response in a dose-dependent manner through a number of signaling pathways involved in cell proliferation, apoptosis and senescence.
58	CASP8 and FADD like apoptosis regulator	CFLAR	NC_000002.12	NM_003879.7	HGNC:1876	2q33.1	Apoptosis regulator protein which may function as a crucial link between cell survival and cell death pathways in mammalian cells.
59	charged multivesicular body protein 2B	CHMP2B	NC_000003.12	NM_014043.4	HGNC:24537	3p11.2	Charged multivesicular body protein 2B (CHMP2B) – a component of the endosomal complex required for transport-III (ESCRT-III) – is responsible for the vital membrane deformation functions in autophagy and endolysosomal trafficking.
60	charged multivesicular body protein 4B	CHMP4B	NC_000020.11	NM_176812.5	HGNC:16171	20q11.22	CHMP4B is associated with both chromosome bridges and micronuclei and that autophagosomes and lysosomes accumulate around CHMP4B-positive micronuclei. This suggests that CHMP4B could mediate autophagolysosomal degradation of extranuclear chromatin
61	CLN3 lysosomal/endosomal transmembrane protein, battenin	CLN3	NC_000016.10	NM_000086.2	HGNC:2074	16p12.1	The loss of CLN3 function has been shown to cause early-stage abnormalities in autophagy, including an accumulation of autophagosomes and autolysosomes, even preceding detectable accumulation of lysosomal storage material
62	cathepsin B	CTSB	NC_000008.11	NM_147780.4	HGNC:2527	8p23.1	CTSB provides an apical signal controlling the expression of lysosomal and autophagy-related proteins as a way of maintaining the population and size of lysosomes and autophagosomes within a cell.
63	cathepsin D	CTSD	NC_000011.10	NM_001909.5	HGNC:2529	11p15.5	Autophagy triggers the maturation of CTSD to promote apoptosis.
64	cathepsin L	CTSL/CTSL1	NC_000009.12	NM_001912.5	HGNC:2537	9q21.33	The protein encoded by this gene is a lysosomal cysteine proteinase that plays a major role in intracellular protein catabolism. Its substrates include collagen and elastin, as well as alpha-1 protease inhibitor, a major controlling element of neutrophil elastase activity.
65	C-X3-C motif chemokine ligand 1	CX3CL1	NC_000016.10	NM_002996.6	HGNC:10647	16q21	Chemokine that acts as a ligand for both CX3CR1 and integrins ITGAV:ITGB3 and ITGA4:ITGB1
66	C-X-C motif chemokine receptor 4	CXCR4	NC_000002.12	NM_001008540.2	HGNC:2561	2q22.1	CXCR4 signaling in AML cells increases autophagic activity and decreases cytarabine-induced apoptosis.
67	death associated protein kinase 1	DAPK1	NC_000009.12	NM_004938.4	HGNC:2674	9q21.33	Death-associated protein kinase 1 is a positive mediator of gamma-interferon induced programmed cell death. DAPK1 encodes a structurally unique 160-kD calmodulin dependent serine-threonine kinase that carries 8 ankyrin repeats and 2 putative P-loop consensus sites.
68	death associated protein kinase 2	DAPK2	NC_000015.10	NM_014326.5	HGNC:2675	15q22.31	This gene encodes a protein that belongs to the serine/threonine protein kinase family. This protein contains a N-terminal protein kinase domain followed by a conserved calmodulin-binding domain with significant similarity to that of death-associated protein kinase 1 (DAPK1), a positive regulator of programmed cell death. Overexpression of this gene was shown to induce cell apoptosis.
69	DNA damage inducible transcript 3	DDIT3	NC_000012.12	NM_004083.6	HGNC:2726	12q13.3	The protein is activated by endoplasmic reticulum stress, and promotes autophagy and apoptosis.
70	DIRAS family GTPase 3	DIRAS3	NC_000001.11	NM_004675.5	HGNC:687	1p31.3	This gene is a member of the ras superfamily, and is expressed in normal ovarian and breast epithelial cells. It is a maternally imprinted gene and its expression is associated with growth suppression.
71	DLC1 Rho GTPase activating protein	DLC1	NC_000008.11	NM_182643.3	HGNC:2897	8p22	It is suggested that this gene is a candidate tumor suppressor gene for human liver cancer, as well as for prostate, lung, colorectal, and breast cancers.
72	DnaJ heat shock protein family (Hsp40) member B1	DNAJB1	NC_000019.10	NM_006145.3	HGNC:5270	19p13.12	This gene encodes a member of the DnaJ or Hsp40 (heat shock protein 40 kD) family of proteins. The encoded protein is a molecular chaperone that stimulates the ATPase activity of Hsp70 heat-shock proteins in order to promote protein folding and prevent misfolded protein aggregation.
73	DnaJ heat shock protein family (Hsp40) member B9	DNAJB9	NC_000007.14	NM_012328.3	HGNC:6968	7q31.1	This gene is a member of the type 2 subgroup of DnaJ proteins. The encoded protein is localized to the endoplasmic reticulum. This protein is induced by endoplasmic reticulum stress and plays a role in protecting stressed cells from apoptosis.
74	DNA damage regulated autophagy modulator 1	DRAM1	NC_000012.12	NM_018370.3	HGNC:25645	12q23.2	The gene encodes a lysosomal membrane protein that is required for the induction of autophagy by the pathway.
75	ER degradation enhancing alpha-mannosidase like protein 1	EDEM1	NC_000003.12	NM_014674.3	HGNC:18967	3p26.1	Enables mannosyl-oligosaccharide 1,2-alpha-mannosidase activity and misfolded protein binding activity. Involved in mannose trimming involved in glycoprotein ERAD pathway; positive regulation of retrograde protein transport, ER to cytosol; and protein targeting to ER.
76	eukaryotic translation elongation factor 2	EEF2	NC_000019.10	NM_001961.4	HGNC:3214	19p13.3	This gene encodes a member of the GTP-binding translation elongation factor family. It promotes the GTP-dependent translocation of the nascent protein chain from the A-site to the P-site of the ribosome.
77	eukaryotic elongation factor 2 kinase	EEF2K	NC_000016.10	NM_013302.5	HGNC:24615	16p12.2	It phosphorylates eukaryotic elongation factor 2 (EEF2) and thus inhibits the EEF2 function.
78	epidermal growth factor receptor	EGFR	NC_000007.14	NM_005228.5	HGNC:3236	7p11.2	EGFR is a cell surface protein that binds to epidermal growth factor. Binding of the protein to a ligand induces receptor dimerization and tyrosine autophosphorylation and leads to cell proliferation.
79	eukaryotic translation initiation factor 2 alpha kinase 2	EIF2AK2	NC_000002.12	NM_002759.4	HGNC:9437	2p22.2	The activated form of the encoded protein can phosphorylate translation initiation factor EIF2S1, which in turn inhibits protein synthesis.The encoded protein plays an important role in the innate immune response against multiple DNA and RNA viruses.
80	eukaryotic translation initiation factor 2 alpha kinase 3	EIF2AK3	NC_000002.12	NM_004836.7	HGNC:3255	2p11.2	This protein is thought to modulate mitochondrial function. It is a type I membrane protein located in the endoplasmic reticulum (ER), where it is induced by ER stress caused by malfolded proteins.
81	eukaryotic translation initiation factor 2 subunit alpha	EIF2S1	NC_000014.9	NM_004094.5	HGNC:3265	14q23.3	The translation initiation factor eIF2 catalyzes the first regulated step of protein synthesis initiation, promoting the binding of the initiator tRNA to 40S ribosomal subunits.
82	eukaryotic translation initiation factor 4E binding protein 1	EIF4EBP1	NC_000008.11	NM_004095.4	HGNC:3288	8p11.23	The protein directly interacts with eukaryotic translation initiation factor 4E (eIF4E), which is a limiting component of the multisubunit complex that recruits 40S ribosomal subunits to the 5' end of mRNAs. Interaction of this protein with eIF4E inhibits complex assembly and represses translation.
83	eukaryotic translation initiation factor 4 gamma 1	EIF4G1	NC_000003.12	NM_182917.4	HGNC:3296	3q27.1	The protein encoded by this gene is a component of the protein complex EIF4F, which is involved in the recognition of the mRNA cap, ATP-dependent unwinding of 5'-terminal secondary structure, and recruitment of mRNA to the ribosome.
84	erb-b2 receptor tyrosine kinase 2	ERBB2	NC_000017.11	NM_004448.4	HGNC:3430	17q12	This gene encodes a member of the epidermal growth factor (EGF) receptor family of receptor tyrosine kinases. This protein has no ligand binding domain of its own and therefore cannot bind growth factors. However, it does bind tightly to other ligand-bound EGF receptor family members to form a heterodimer, stabilizing ligand binding and enhancing kinase-mediated activation of downstream signallin…
85	endoplasmic reticulum to nucleus signaling 1	ERN1	NC_000017.11	NM_001433.5	HGNC:3449	17q23.3	The protein encoded by this gene is the ER to nucleus signalling 1 protein, a human homologue of the yeast Ire1 gene product. This protein possesses intrinsic kinase activity and an endoribonuclease activity and it is important in altering gene expression as a response to endoplasmic reticulum-based stress signals.
86	endoplasmic reticulum oxidoreductase 1 alpha	ERO1A/ERO1L	NC_000014.9	NM_014584.3	HGNC:13280	14q22.1	Enables oxidoreductase activity. Involved in chaperone cofactor-dependent protein refolding. Located in endoplasmic reticulum.
87	Fas associated via death domain	FADD	NC_000011.10	NM_003824.4	HGNC:3573	11q13.3	FADD has been used as a potential autophagy-related prognostic marker in lung squamous cell carcinoma and head and neck squamous cell carcinoma. The protein encoded by this gene is an adaptor molecule that interacts with various cell surface receptors and mediates cell apoptotic signals. Interaction of this protein with the receptors unmasks the N-terminal effector domain of this protein, which a…
*88	family with sequence similarity 215 member A	FAM215A/c17orf88	NC_000017.11	NR_026770.1	HGNC:17505	17q21.31	FAM215A interacts with LAMP2 to protect it from ubiquitination.
89	Fas cell surface death receptor	FAS	NC_000010.11	NM_000043.6	HGNC:11920	10q23.31	The protein encoded by this gene is a member of the TNF-receptor superfamily. This receptor contains a death domain. The interaction of this receptor with its ligand allows the formation of a death-inducing signaling complex that includes Fas-associated death domain protein (FADD), caspase 8, and caspase 10.
90	FKBP prolyl isomerase 1A	FKBP1A	NC_000020.11	NM_000801.5	HGNC:3711	20p13	The protein encoded by this gene is a member of the immunophilin protein family, which play a role in immunoregulation and basic cellular processes involving protein folding and trafficking.
91	FKBP prolyl isomerase 1B	FKBP1B	NC_000002.12	NM_004116.5	HGNC:3712	2p23.3	The protein encoded by this gene is a member of the immunophilin protein family, which play a role in immunoregulation and basic cellular processes involving protein folding and trafficking.
92	Fos proto-oncogene, AP-1 transcription factor subunit	FOS	NC_000014.9	NM_005252.4	HGNC:3796	14q24.3	The Fos gene family consists of 4 members: FOS, FOSB, FOSL1, and FOSL2. These genes encode leucine zipper proteins that can dimerize with proteins of the JUN family. In some cases, expression of the FOS gene has also been associated with apoptotic cell death.
93	forkhead box O1	FOXO1	NC_000013.11	NM_002015.4	HGNC:3819	13q14.11	This gene belongs to the forkhead family of transcription factors which are characterized by a distinct forkhead domain. The specific function of this gene has not yet been determined; however, it may play a role in myogenic growth and differentiation.
94	forkhead box O3	FOXO3	NC_000006.12	NM_001455.4	HGNC:3821	6q21	FOXO3 is a transcription factor known to control the expression levels of multiple autophagy-related genes, including MLP3B and BNIP3, and binding of FOXO3 to the protein kinase ATM triggers autophosphorylation and activation of the latter protein ;activation of ATM triggers the initiation of a phosphorylation cascade that regulates the activity of various downstream targets, including AAPK and P…
95	alpha glucosidase	GAA	NC_000017.11	NM_000152.5	HGNC:4065	17q25.3	This gene encodes acid alpha-glucosidase, which is essential for the degradation of glycogen to glucose in lysosomes.
96	GABA type A receptor-associated protein	GABARAP	NC_000017.11	NM_007278.2	HGNC:4067	17p13.1	Ubiquitin-like module coupled to PE and used as a marker of autophagosome; recognition of adaptors specific to cargo.
97	GABA type A receptor associated protein like 1	GABARAPL1	NC_000012.12	NM_001363598.2	HGNC:4068	12p13.2	Ubiquitin-like module coupled to PE and used as a marker of autophagosome; recognition of adaptors specific to cargo.
98	GABA type A receptor associated protein like 2	GABARAPL2	NC_000016.10	NM_007285.7	HGNC:13291	16q23.1	Ubiquitin-like module coupled to PE and used as a marker of autophagosome; recognition of adaptors specific to cargo.
*99	GABA type A receptor associated protein like 3 pseudogene	GABARAPL3	NC_000015.10	NR_028287.1	HGNC:4069	15q26.1	Ubiquitin-like modifier involved in autophagosome formation. Whereas LC3s are involved in elongation of the phagophore membrane, the GABARAP/GATE-16 subfamily is essential for a later stage in autophagosome maturation
100	glyceraldehyde-3-phosphate dehydrogenase	GAPDH	NC_000012.12	NM_002046.7	HGNC:4141	12p13.31	The product of this gene catalyzes an important energy-yielding step in carbohydrate metabolism, the reversible oxidative phosphorylation of glyceraldehyde-3-phosphate in the presence of inorganic phosphate and nicotinamide adenine dinucleotide (NAD).
101	G protein subunit alpha i3	GNAI3	NC_000001.11	NM_006496.4	HGNC:4387	1p13.3	Guanine nucleotide-binding proteins (G proteins) are involved as modulators or transducers in various transmembrane signaling pathways.
102	golgi associated PDZ and coiled-coil motif containing	GOPC	NC_000006.12	NM_020399.4	HGNC:17643	6q22.1	This gene encodes a Golgi protein with a PDZ domain. The PDZ domain is globular and proteins which contain them bind other proteins through short motifs near the C-termini.
103	glutamate ionotropic receptor delta type subunit 1	GRID1	NC_000010.11	NM_017551.3	HGNC:4575	10q23.1-q23.2	This gene encodes a subunit of glutamate receptor channels. These channels mediate most of the fast excitatory synaptic transmission in the central nervous system and play key roles in synaptic plasticity.
104	glutamate ionotropic receptor delta type subunit 2	GRID2	NC_000004.12	NM_001286838.1	HGNC:4576	4q22.1-q22.2	The protein encoded by this gene is a member of the family of ionotropic glutamate receptors which are the predominant excitatory neurotransmitter receptors in the mammalian brain
105	histone deacetylase 1	HDAC1	NC_000001.11	NM_004964.3	HGNC:4852	1p35.2-p35.1	The protein encoded by this gene belongs to the histone deacetylase/acuc/apha family and is a component of the histone deacetylase complex. It also interacts with retinoblastoma tumor-suppressor protein and this complex is a key element in the control of cell proliferation and differentiation. Together with metastasis-associated protein-2, it deacetylates p53 and modulates its effect on cell grow…
106	histone deacetylase 6	HDAC6	NC_000023.11	NM_006044.4	HGNC:14064	Xp11.23	The protein encoded by this gene belongs to class II of the histone deacetylase/acuc/apha family. This protein possesses histone deacetylase activity and represses transcription.
107	hepatocyte growth factor-regulated tyrosine kinase substrate	HGS	NC_000017.11	NM_004712.5	HGNC:4897	17q25.3	The protein encoded by this gene regulates endosomal sorting and plays a critical role in the recycling and degradation of membrane receptors. The encoded protein sorts monoubiquitinated membrane proteins into the multivesicular body, targeting these proteins for lysosome-dependent degradation.
108	hypoxia inducible factor 1 subunit alpha	HIF1A	NC_000014.9	NM_001530.4	HGNC:4910	14q23.2	Hypoxia-inducible factor-1 (HIF1) is a transcription factor found in mammalian cells cultured under reduced oxygen tension that plays an essential role in cellular and systemic homeostatic responses to hypoxia. Hypoxia can induce autophagy through activation of multiple oxygen-sensitive signaling pathways. One such pathway involves hypoxia-inducible factors (HIFs).
109	heat shock protein 90 alpha family class B member 1	HSP90AB1	NC_000006.12	NM_007355.4	HGNC:5258	6p21.1	Hsp90ab1 stabilized LRP5 to promote EMT via activating the AKT and Wnt/β-catenin signaling pathways.
110	heat shock protein family A (Hsp70) member 5	HSPA5	NC_000009.12	NM_005347.5	HGNC:5238	9q33.3	HSPA5 plays a crucial role in the clearance of aggregated proteins decorated with polyubiquitin through their interaction with SQSTM1/p62 (sequestosome 1) of stressed cells.
111	heat shock protein family A (Hsp70) member 8	HSPA8	NC_000011.10	NM_006597.6	HGNC:5241	11q24.1	HSPA8 is a crucial molecular regulator of chaperone-mediated autophagy, as a detector of substrates that will be processed by this specialized autophagy pathway.
112	heat shock protein family B (small) member 8	HSPB8	NC_000012.12	NM_014365.3	HGNC:30171	12q24.23	This protein functions as a chaperone in association with Bag3, a stimulator of macroautophagy.
113	interferon gamma	IFNG	NC_000012.12	NM_000619.3	HGNC:5438	12q15	IFN-γ induced autophagosome formation and conversion/turnover of microtubule associated protein 1 light chain 3 (LC3) protein.
114	inhibitor of nuclear factor kappa B kinase subunit beta	IKBKB	NC_000008.11	NM_001190720.3	HGNC:5960	8p11.21	IKKB has been implicated in the activation of mTOR and inhibition of autophagy
115	inhibitor of nuclear factor kappa B kinase subunit epsilon	IKBKE	NC_000001.11	NM_001193321.2	HGNC:14552	1q32.1	IKBKE is required for induction of autophagy by transforming PI3K-AKT-MTOR pathway commonly activated in breast cancer
116	interleukin 24	IL24	NC_000001.11	NM_006850.3	HGNC:11346	1q32.1	IL-24 induces a toxic form of autophagy in glioblastoma cells through PERK activation
117	immunity related GTPase M	IRGM	NC_000005.10	NM_001145805.2	HGNC:29597	5q33.1	The physical association of IRGM with mitochondria and different autophagy-regulating proteins, ATG5, ATG10, SH3GLB1, and LC3, contribute to explain how IRGM could regulate autophagy.
118	integrin subunit alpha 3	ITGA3	NC_000017.11	NM_005501.2	HGNC:6139	17q21.33	Integrin alpha 3 (ITGA3) belongs to the family of integrins, which are heterodimeric integral membrane proteins that function as cell surface adhesion molecules. This gene has been reported in several autophagy-related prognostic models for various tumors, indicating its important role in the progression of tumors
119	integrin subunit alpha 6	ITGA6	NC_000002.12	NM_000210.4	HGNC:6142	2q31.1	ITGA6 is a member of the integrins family. Many integrins contribute to tumor progression, and ITGA6 has been implicated in breast cancer progression
120	integrin subunit beta 1	ITGB1	NC_000010.11	NM_002211.4	HGNC:6153	10p11.22	The induction of autophagy, resulted from decreased ITGA3-ITGB1 function, functions as a key mediator of anoikis resistance in mammary epithelial cells during extracellular matrix detachment
121	integrin subunit beta 4	ITGB4	NC_000017.11	NM_000213.5	HGNC:6158	17q25.1	The induction of autophagy, resulted from decreased ITGA3-ITGB1 function, functions as a key mediator of anoikis resistance in mammary epithelial cells during extracellular matrix detachment
122	inositol 1,4,5-trisphosphate receptor type 1	ITPR1	NC_000003.12	NM_002222.7	HGNC:6180	3p26.1	ITPR1 induced the release of Ca2+ and promoted ATP synthesis in the non-starvation state, thereby inhibiting AMPK activity and inhibiting autophagy.
123	kinesin family member 5B	KIF5B	NC_000010.11	NM_004521.3	HGNC:6324	10p11.22	KIF5B may act as a cancer relevant lysosomal motor protein with additional functions in autophagosome formation.
124	kelch like family member 24	KLHL24	NC_000003.12	NM_017644.3	HGNC:25947	3q27.1	Klhl24 mRNA can be used to monitor autophagy in patients undergoing breast cancer therapy. Very recently Klhl24 has been identified as part of an autophagy related signature in acute myeloid leukemia
125	lysosomal associated membrane protein 1	LAMP1	NC_000013.11	NM_005561.4	HGNC:6499	13q34	LAMP1 is an autophagy factor that not only promotes invasive cell metastasis but also assists with other factors to reduce the susceptibility of some factors to induce lysosomal cell death and increase the development of drug resistance
126	lysosomal associated membrane protein 2	LAMP2	NC_000023.11	NM_001122606.1	HGNC:6501	Xq24	The LAMP2 gene provides instructions for making a protein called lysosomal associated membrane protein-2 (LAMP-2), which, as its name suggests, is found in the membrane of cellular structures called lysosomes. The LAMP-2 protein may be involved in the fusion between autophagic vacuoles and lysosomes.
127	microtubule associated protein 1 light chain 3 alpha	MAP1LC3A	NC_000020.11	NM_181509.3	HGNC:6838	20q11.22	Ubiquitin-like module coupled to PE and used as a marker of autophagosome; recognition of adaptors specific to cargo.
128	microtubule associated protein 1 light chain 3 beta	MAP1LC3B	NC_000016.10	NM_022818.5	HGNC:13352	16q24.2	Ubiquitin-like module coupled to PE and used as a marker of autophagosome; recognition of adaptors specific to cargo.
129	microtubule associated protein 1 light chain 3 gamma	MAP1LC3C	NC_000001.11	NM_001004343.3	HGNC:13353	1q43	Ubiquitin-like module coupled to PE and used as a marker of autophagosome; recognition of adaptors specific to cargo.
130	mitogen-activated protein kinase kinase 7	MAP2K7	NC_000019.10	NM_001297555.2	HGNC:6847	19p13.2	The protein encoded by this gene is a dual specificity protein kinase that belongs to the MAP kinase kinase family. This kinase is involved in the signal transduction mediating the cell responses to proinflammatory cytokines, and environmental stresses.
131	mitogen-activated protein kinase 1	MAPK1	NC_000022.11	NM_002745.5	HGNC:6871	22q11.22	The protein encoded by this gene is a member of the MAP kinase family. Upon activation, this kinase translocates to the nucleus of the stimulated cells, where it phosphorylates nuclear targets.
132	mitogen-activated protein kinase 3	MAPK3	NC_000016.10	NM_001040056.3	HGNC:6877	16p11.2	The protein encoded by this gene is a member of the MAP kinase family. Upon activation, this kinase translocates to the nucleus of the stimulated cells, where it phosphorylates nuclear targets.
133	mitogen-activated protein kinase 8	MAPK8	NC_000010.11	NM_001278547.2	HGNC:6881	10q11.22	The protein encoded by this gene is a member of the MAP kinase family. Upon activation, this kinase translocates to the nucleus of the stimulated cells, where it phosphorylates nuclear targets.
134	mitogen-activated protein kinase 8 interacting protein 1	MAPK8IP1	NC_000011.10	NM_005456.4	HGNC:6882	11p11.2	This protein has been shown to prevent MAPK8 mediated activation of transcription factors, and decrease IL-1 beta and MAP kinase kinase 1 (MEKK1) induced apoptosis in pancreatic beta cells.
135	mitogen-activated protein kinase 9	MAPK9	NC_000005.10	NM_001135044.2	HGNC:6886	5q35.3	It is most closely related to MAPK8, both of which are involved in UV radiation induced apoptosis, thought to be related to the cytochrome c-mediated cell death pathway. This gene and MAPK8 are also known as c-Jun N-terminal kinases. This kinase blocks the ubiquitination of tumor suppressor p53, and thus it increases the stability of p53 in nonstressed cells.
136	membrane bound transcription factor peptidase, site 2	MBTPS2	NC_000023.11	NM_015884.4	HGNC:15455	Xp22.12	This gene encodes a intramembrane zinc metalloprotease, which is essential in development. This protease functions in the signal protein activation involved in sterol control of transcription and the ER stress response.
137	MTOR associated protein, LST8 homolog	MLST8	NC_000016.10	NM_022372.6	HGNC:24825	16p13.3	Enables protein serine/threonine kinase activator activity. Involved in TORC1 signaling; positive regulation of TOR signaling; and regulation of actin cytoskeleton organization. Part of TORC1 complex and TORC2 complex.
138	myotubularin related protein 14	MTMR14	NC_000003.12	NM_022485.5	HGNC:26190	3p25.3	Myotubularin-related protein 14 (MTMR14), a member of the myotubularin (MTM)-related protein family, is a novel phosphoinositide phosphatase. MTMR14 is involved in the regulation of the aging process, normal muscle performance, and autophagy
139	mechanistic target of rapamycin kinase	MTOR	NC_000001.11	NM_004958.4	HGNC:3942	1p36.22	The protein encoded by this gene belongs to a family of phosphatidylinositol kinase-related kinases. These kinases mediate cellular responses to stresses such as DNA damage and nutrient deprivation. This protein acts as the target for the cell-cycle arrest and immunosuppressive effects of the FKBP12-rapamycin complex. exposure of cells to H2O2 can uppress mTORC1 activity through activation of ATM…
140	MYC proto-oncogene, bHLH transcription factor	MYC	NC_000008.11	NM_001354870.1	HGNC:7553	8q24.21	MYC suppresses the autophagy-lysosomal system by transcriptionally repressing genes that encode regulators and components of this pathway
141	nuclear assembly factor 1 ribonucleoprotein	NAF1	NC_000004.12	NM_138386.3	HGNC:25126	4q32.2	The protein, which is localized in both ER and in mitochondria, has been functionally implicated in cell autophagy, possibly as a mediator of Bcl-2 antagonism of Beclin-1 dependent autophagy on the surface of the ER
142	nicotinamide phosphoribosyltransferase	NAMPT	NC_000007.14	NM_182790.1	HGNC:30092	7q22.3	Nampt critically regulates NAD+ content, thereby playing an essential role in mediating cell survival by inhibiting apoptosis and stimulating autophagic flux
143	NBR1 autophagy cargo receptor	NBR1	NC_000017.11	NM_005899.5	HGNC:6746	17q21.31	NBR1 is an ATG8-interacting protein that binds ubiquitinated cargo and is degraded by autophagy. exogenous expression of NBR1, but not SQSTM, promotes peroxisome clustering and lysosome targeting
144	NCK associated protein 1	NCKAP1	NC_000002.12	NM_205842.3	HGNC:7666	2q32.1	Contributes to small GTPase binding activity. Involved in Rac protein signal transduction; positive regulation of Arp2/3 complex-mediated actin nucleation; and positive regulation of lamellipodium assembly.
145	NFE2 like bZIP transcription factor 2	NFE2L2	NC_000002.12	NM_006164.5	HGNC:7782	2q31.2	NFE2L2 plays a pivotal role in the regulation of the antioxidant response . Activation of the NFE2L2 pathway in astrocytes decreased the increase of ROS in neurons induced by autophagy impairment of astrocytes during oxidative stress.
146	nuclear factor kappa B subunit 1	NFKB1	NC_000004.12	NM_003998.4	HGNC:7794	4q24	It has been demonstrated that NF-Κβ (NFKB1) could trigger autophagy by directly inducing the expression of genes or proteins involved in the autophagosome machine, such as Beclin 1, BAG3-HspB8 complex, ATG5, and LC3
147	NK2 homeobox 3	NKX2-3	NC_000010.11	NM_145285.3	HGNC:7836	10q24.2	Nkx2-3 promoted autophagy in vascular smooth muscle cells by activating the AMP-activated protein kinase/mammalian target of rapamycin (AMPK/mTOR) signaling pathway.
148	NLR family CARD domain containing 4	NLRC4	NC_000002.12	NM_021209.4	HGNC:16412	2p22.3	NLRC4 associates with autophagic protein beclin 1/Atg6. Upon infection, PAMPs binding to NLRC4 release beclin 1 to induce autophagy.
149	NPC intracellular cholesterol transporter 1	NPC1	NC_000018.10	NM_000271.5	HGNC:7897	18q11.2	NPC1 in human fibroblasts causes increased spontaneous activation of the autophagic pathway. Progression of autophagy has been argued to be normal in NPC1.
150	nuclear receptor binding factor 2	NRBF2	NC_000010.11	NM_030759.5	HGNC:19692	10q21.3	A key role for NRBF2 in the assembly of the specific Atg14L-Beclin 1-Vps34-Vps15 complex for autophagy induction. Thus, NRBF2 modulates autophagy via regulation of PI3K-III and prevents ER stress-mediated cytotoxicity.
151	neuregulin 1	NRG1	NC_000008.11	NM_001159995.3	HGNC:7997	8p12	Neuregulin 1 (NRG1) was originally identified as a 44-kD glycoprotein that interacts with the NEU/ERBB2 receptor tyrosine kinase to increase its phosphorylation on tyrosine residues.Under conditions of stress, including viral infection, cytotoxic agents, and oxidative stress, activation of NRG-1/ErbB signaling can protect myocardial cells against apoptosis
152	neuregulin 2	NRG2	NC_000005.10	NM_013982.3	HGNC:7998	5q31.2	Neuregulin 2 (NRG2) is a novel member of the neuregulin family of growth and differentiation factors. Through interaction with the Erbb family of receptors, NRG2 induces the growth and differentiation of epithelial, neuronal, glial, and other types of cells. The gene consists of 12 exons and the genomic structure is similar to that of neuregulin 1 (NRG1), another member of the neuregulin family o…
153	neuregulin 3	NRG3	NC_000010.11	NM_001010848.4	HGNC:7999	10q23.1	NRG3 has been shown to activate the tyrosine phosphorylation of its cognate receptor, ERBB4, and is thought to influence neuroblast proliferation, migration and differentiation by signalling through ERBB4.The NRG3, in the larger neuregulin gene family, induces proliferation, migration, differentiation, and survival or apoptosis of cancer cells.
154	prolyl 4-hydroxylase subunit beta	P4HB	NC_000017.11	NM_000918.4	HGNC:8548	17q25.3	P4HB (Prolyl 4-hydroxylase, beta polypeptide) can act as a molecular chaperone to refine misfolded proteins in response to endoplasmic reticulum (ER) stress .P4HB may interact with ER stress related proteins such as HSP90B1, HSPA5 and PDIA6 to regulate autophagy in Kidney Renal Clear Cell Carcinoma (KIRC).
155	poly(ADP-ribose) polymerase 1	PARP1	NC_000001.11	NM_001618.4	HGNC:270	1q42.12	PARP1 could be activated by oxidative stress or other stresses and PARP1-mediated poly(ADP-ribosyl)ation is concerned with the progression of autophagy. PARP1-mediated poly(ADP-ribosyl)ation dissociated histone H1, promotes FoxO3a transactivation, leading to increased autophagy related-gene expression. PARP1 is a predominantly nuclear enzyme that converts NAD+ into poly(ADP-ribose), and hyperacti…
156	proliferation and apoptosis adaptor protein 15	PEA15	NC_000001.11	NM_003768.5	HGNC:8822	1q23.2	PEA15 is a death effector domain (DED)-containing protein predominantly expressed in the central nervous system, particularly in astrocytes. PEA-15 expression inhibits cell proliferation and induces autophagy.
157	proline, glutamate and leucine rich protein 1	PELP1	NC_000017.11	NM_014389.3	HGNC:30134	17p13.2	Proline-, glutamic acid–, and leucine-rich protein 1 (PELP1) is a novel estrogen receptor (ER) coregulatory protein that positively modulates ER transcriptional functions. PELP1 is also accumulated in the autophagosomes.
158	peroxisomal biogenesis factor 14	PEX14	NC_000001.11	NM_004565.3	HGNC:8856	1p36.22	PEX14 is a peroxisomal membrane protein that normally functions as a docking factor for cargo-loaded PEX5. Under conditions of starvation, where PEX5 is mostly cargo-unloaded, PEX14 can interact with LC3-II, thereby promoting peroxisome degradation. Starvation-induced pexophagy can be further enhanced by a PEX14-dependent recruitment of TNKS1/2 onto the peroxisomal membrane
159	peroxisomal biogenesis factor 3	PEX3	NC_000006.12	NM_003630.3	HGNC:8858	6q24.2	The crystal structure of human PEX3 has been determined with a peptide of PEX19 , elucidating the PEX3-PEX19 interaction region, which is likely similar in yeast based on a high degree of conservation of Pex3. Induction of pexophagy has been reported in mammalian cells by fusing ubiquitin moieties to PEX3 and PMP34
160	phosphatidylinositol 3-kinase catalytic subunit type 3	PIK3C3/VPS34	NC_000018.10	NM_002647.4	HGNC:8974	18q12.3	PIK3C3 can phosphorylate phosphatidylinositol (PtdIns) to generate phosphatidylinositol 3-phosphate (PI3P), a phospholipid central to autophagy. Inhibition of PIK3C3 successfully inhibits autophagy. The class III PtdIns3K catalytic subunit PIK3C3/Vps34 forms a protein complex with BECN1 and PIK3R4 and produces phosphatidylinositol 3-phosphate (PtdIns3P), which is required for the initiation and p…
161	phosphoinositide-3-kinase regulatory subunit 4	PIK3R4	NC_000003.12	NM_014602.3	HGNC:8982	3q22.1	Class III PtdIns3K forms large multi-subunit complexes with PIK3R4 as the regulatory subunit. The class III PtdIns3K catalytic subunit PIK3C3/Vps34 forms a protein complex with BECN1 and PIK3R4 and produces phosphatidylinositol 3-phosphate (PtdIns3P), which is required for the initiation and progression of autophagy.
162	PTEN induced kinase 1	PINK1	NC_000001.11	NM_032409.3	HGNC:14581	1p36.12	The role of PINK1 in the autophagic process has mainly focused on mitophagy, in which selective degradation of mitochondria occurs through the regulation of Parkin, an E3 ubiquitin ligase linked to PD. Upon dissipation of Δψm, PINK1 is localized to damaged mitochondria,15-18 driven by calcium-dependent gene expression.
163	protein phosphatase 1 regulatory subunit 15A	PPP1R15A	NC_000019.10	NM_014330.5	HGNC:14375	19q13.2	Plays an essential role in autophagy by tuning translation during starvation, thus enabling lysosomal biogenesis and a sustained autophagic flux
164	protein kinase AMP-activated non-catalytic subunit beta 1	PRKAB1	NC_000012.12	NM_006253.5	HGNC:9378	12q24.23	The protein encoded by this gene is a regulatory subunit of the AMP-activated protein kinase (AMPK). AMPK is a heterotrimer consisting of an alpha catalytic subunit, and non-catalytic beta and gamma subunits. AMPK is an important energy-sensing enzyme that monitors cellular energy status. Results suggest that AMPK association with ULK1 plays an important role in autophagy induction
165	protein kinase cAMP-dependent type I regulatory subunit alpha	PRKAR1A	NC_000017.11	NM_001276289.2	HGNC:9388	17q24.2	PRKAR1A is shown to regulate autophagy via association with mTOR kinase and colocalization with the autophagy marker proteins LC3B, Rab7 and Rab9
166	protein kinase C delta	PRKCD	NC_000003.12	NM_001316327.2	HGNC:9399	3p21.1	PKCD activates autophagy by promoting JNK1-mediated Bcl-2 phosphorylation and dissociation of the Bcl-2/Beclin 1 complex.
167	protein kinase C theta	PRKCQ	NC_000010.11	NM_006257.5	HGNC:9410	10p15.1	Protein kinase C (PKC) is a family of serine- and threonine-specific protein kinases that can be activated by calcium and the second messenger diacylglycerol. This kinase is important for T-cell activation. It is required for the activation of the transcription factors NF-kappaB and AP-1, and may link the T cell receptor (TCR) signaling complex to the activation of the transcription factors.
168	parkin RBR E3 ubiquitin protein ligase	PRKN/PARK2	NC_000006.12	NM_004562.3	HGNC:8607	6q26	The E3 ubiquitin ligase PARK2 and the mitochondrial protein kinase PINK1 are required for the initiation of mitochondrial damage-induced mitophagy. Together, PARK2 and PINK1 generate a phospho-ubiquitin signal on outer mitochondrial membrane proteins that triggers recruitment of the autophagy machinery.
169	phosphatase and tensin homolog	PTEN	NC_000010.11	NM_000314.8	HGNC:9588	10q23.31	PTEN, which is frequently mutated in glioblastomas, is a tumor suppressor gene that encodes a dual specificity phosphatase that antagonizes the phosphatidylinositol 3-kinase class I/AKT/mTOR pathway, which is a key regulator of autophagy.
170	protein tyrosine kinase 6	PTK6	NC_000020.11	NM_001256358.2	HGNC:9617	20q13.33	The protein encoded by this gene is a cytoplasmic nonreceptor protein kinase which may function as an intracellular signal transducer in epithelial tissues. The encoded protein has been shown to undergo autophosphorylation.
171	RAB11A, member RAS oncogene family	RAB11A	NC_000015.10	NM_001206836.2	HGNC:9760	15q22.31	Rab11 facilitates the fusion of endosomes and autophagosomes by removing Hook from mature late endosomes and inhibiting its homodimerization. Thus induction of autophagy appears to promote autophagic flux by increased convergence with the endosomal pathway.
172	RAB1A, member RAS oncogene family	RAB1A	NC_000002.12	NM_004161.5	HGNC:9758	2p14	Rab1A participate in autophagosome formation.
173	RAB24, member RAS oncogene family	RAB24	NC_000005.10	NM_130781.4	HGNC:9765	5q35.3	RAB24 is an atypical RAB protein that is required for the clearance of late autophagic vacuoles under basal conditions.
174	RAB33B, member RAS oncogene family	RAB33B	NC_000004.12	NM_031296.3	HGNC:16075	4q31.1	Autophagosome formation is regulated by Rab33B through the Atg12 conjugation system
175	RAB5A, member RAS oncogene family	RAB5A	NC_000003.12	NM_004162.5	HGNC:9783	3p24.3	RAB5 was found to be a regulator of the early steps of autophagosome formation. Similarly to its endosomal functions, RAB5 may have a role in the recruitment of the autophagic BECN1-PIK3C3 complex and subsequent PtdIns3P production on the phagophore membrane.
176	RAB7A, member RAS oncogene family	RAB7A	NC_000003.12	NM_004637.6	HGNC:9788	3q21.3	Rab7 regulates late endosome transport. The small GTPase, Rab7a, and the regulators of its GDP/GTP-binding status were shown to have roles in both endocytic membrane traffic and autophagy. Rab7a and its regulators are critical for the correct targeting of Atg9a-bearing vesicles to effect autophagosome formation around damaged mitochondria.
177	Rac family small GTPase 1	RAC1	NC_000007.14	NM_018890.4	HGNC:9801	7p22.1	Rac1 reduces autophagy flux by repressing the expressing of autophagy genes. Further investigation revealed that under nutrient-rich conditions, mammalian target of rapamycin (mTOR) phosphorylates TFEB to facilitate the interaction between Rac1 and TFEB
178	receptor for activated C kinase 1	RACK1/GNB2L1	NC_000005.10	NM_006098.5	HGNC:4399	5q35.3	RACK1 participates in the formation of autophagosome biogenesis complex upon its phosphorylation by AMPK at Thr50. Thr50 phosphorylation of RACK1 enhances its direct binding to Vps15, Atg14L, and Beclin 1, thereby promoting the assembly of the autophagy-initiation complex.
179	Raf-1 proto-oncogene, serine/threonine kinase	RAF1	NC_000003.12	NM_002880.4	HGNC:9829	3p25.2	Raf1 promotes resistance to apoptosis and autophagy in cancer cells, and enhances replicative immortality by regulating telomere maintenance. Raf1 has also been implicated in organ regeneration, therefore may induce angiogenesis, which is essential for tumor growth.
180	RB transcriptional corepressor 1	RB1	NC_000013.11	NM_000321.3	HGNC:9884	13q14.2	RB1 gene mutation reduces the level of autophagy by changing the expression of RB tumor repression proteins, thus inducing cell gene damage or cell death
181	RB1 inducible coiled-coil 1	RB1CC1/FIP200	NC_000008.11	NM_014781.5	HGNC:15574	8q11.23	RB1CC1 is a newly identified essential autophagy gene for maintaining protein homeostasis, attenuating autophagosome formation. Atg17-like region of human FIP200 bind to ATG13 and form a dimer with the N-termini protruding outwards, although the overall shape of the resulting dimers differs
182	RELA proto-oncogene, NF-kB subunit	RELA	NC_000011.10	NM_021975.4	HGNC:9955	11q13.1	RELA, or RELB (MIM 604758) to form the NFKB complex. The p50 (NFKB1)/p65 (RELA) heterodimer is the most abundant form of NFKB. The NFKB complex is inhibited by I-kappa-B proteins (NFKBIA, MIM 164008 or NFKBIB, MIM 604495), which inactivate NFKB by trapping it in the cytoplasm. Phosphorylation of serine residues on the I-kappa-B proteins by kinases (IKBKA, MIM 600664, or IKBKB, MIM 603258) marks t…
183	regulator of G protein signaling 19	RGS19	NC_000020.11	NM_005873.3	HGNC:13735	20q13.33	RGS19 and GNAI3 are engaged in controlling autophagy in human
184	Ras homolog, mTORC1 binding	RHEB	NC_000007.14	NM_005614.4	HGNC:10011	7q36.1	Rheb is inhibited in response to GD and prolonged ischemia, and inhibition of Rheb in turn inhibits mTORC1. Forced activation of Rheb in such conditions stimulates ATP depletion and ER stress by suppression of autophagy, thereby inducing cell death
185	ribosomal protein S6 kinase B1	RPS6KB1	NC_000017.11	NM_003161.4	HGNC:10436	17q23.1	RPS6KB1 is a serine/threonine kinase regulated by phosphoinositide 3-kinase (PI3K)/mammalian target of rapamycin (mTOR) pathway
186	regulatory associated protein of MTOR complex 1	RPTOR	NC_000017.11	NM_020761.3	HGNC:30287	17q25.3	This gene encodes a component of a signaling pathway that regulates cell growth in response to nutrient and insulin levels. The encoded protein forms a stoichiometric complex with the mTOR kinase
187	rubicon autophagy regulator	RUBCN/KIAA0226	NC_000003.12	NM_001145642.5	HGNC:28991	3q29	The protein encoded by this gene is a negative regulator of autophagy and endocytic trafficking and controls endosome maturation.
188	secretion associated Ras related GTPase 1A	SAR1A	NC_000010.11	NM_001142648.2	HGNC:10534	10q22.1	Predicted to enable GTPase activity. Involved in COPII-coated vesicle cargo loading. Part of COPII vesicle coat.
189	serpin family A member 1	SERPINA1	NC_000014.9	NM_001002235.3	HGNC:8941	14q32.13	SERPINA1 protein favored tumor cell growth and inhibit autophagy.
190	sestrin 2	SESN2	NC_000001.11	NM_031459.5	HGNC:20746	1p35.3	SESN2 is reported to be associated with oxidative stress-induced autophagy. TP53/p53 is defined as a major transcriptional regulator of SESN2 under DNA damage and oxidative stress.
191	SH3 domain containing GRB2 like, endophilin B1	SH3GLB1	NC_000001.11	NM_016009.5	HGNC:10833	1p22.3	SH3GLB1 can promote cell death by inducing apoptosis through Bax, or by redirecting to necrosis through autophagy and GSK3β inhibition
192	sirtuin 1	SIRT1	NC_000010.11	NM_012238.5	HGNC:14929	10q21.3	SIRT1, an NAD-dependent deacetylase, plays a role in regulation of autophagy. SIRT1 increases mitochondrial function and reduces oxidative stress, and has been linked to age-related reactive oxygen species (ROS) generation, which is highly dependent on mitochondrial metabolism.
193	sirtuin 2	SIRT2	NC_000019.10	NM_001193286.2	HGNC:10886	19q13.2	SIRT2 is a mechanical sensitive protein, and it regulates ASS induced cell apoptosis by modulating the release of exosomes and autophagy components.
194	sphingosine kinase 1	SPHK1	NC_000017.11	NM_182965.3	HGNC:11240	17q25.1	SphK1 facilitates endocytic trafficking. Inhibition of SphK1 with a lipid-based inhibitor or in the presence of sphingosine accumulates enlarged, dysfunctional late endosomes that impair autophagy. The autophagic machinery coordinates with lysosomal biogenesis to restore endocytic trafficking, thus highlighting crosstalk between autophagy, sphingolipids and endocytosis.
195	sphingolipid transporter 1 (putative)	SPNS1	NC_000016.10	NM_032038.3	HGNC:30621	16p11.2	The Spin/Spns1 defect induces aberrant autolysosome formation that leads to developmental senescence in the embryonic stage and premature aging symptoms in adulthood.
196	sequestosome 1	SQSTM1	NC_000005.10	NM_001142298.2	HGNC:11280	5q35.3	SQSTM increases the efficiency of NBR1-mediated pexophagy
197	ST13 Hsp70 interacting protein	ST13	NC_000022.11	NM_003932.5	HGNC:11343	22q13.2	The protein encoded by this gene is an adaptor protein that mediates the association of the heat shock proteins HSP70 and HSP90.
198	serine/threonine kinase 11	STK11	NC_000019.10	NM_000455.5	HGNC:11389	19p13.3	This gene, which encodes a member of the serine/threonine kinase family, regulates cell polarity and functions as a tumor suppressor. STK11 is important for initiating autophagy as STK11 silencing abrogates LC3B-II puncta, autophagosome/lysosome fusion and lysosomal activity.
199	SPT20 homolog, SAGA complex component	SUPT20H/FAM48A	NC_000013.11	NM_017569.4	HGNC:20596	13q13.3	Required for starvation-induced ATG9A trafficking during autophagy
200	TANK binding kinase 1	TBK1	NC_000012.12	NM_013254.4	HGNC:11584	12q14.2	TBK1 in mediating inflammation through macroautophagy/autophagy. While its function in inducing interferon production in response to viral infection has been extensively studied, its role in antiviral autophagy is only beginning to be appreciated
201	transmembrane 9 superfamily member 1	TM9SF1	NC_000014.9	NM_006405.7	HGNC:11864	14q12	TM9SF1 plays a key role in the regulation of cell autophagy. TM9SF1 overexpression induced high levels of autophagosome formation.
202	transmembrane protein 41B	TMEM41B	NC_000011.10	NM_001165030.3	HGNC:28948	11p15.4	TMEM41B is an integral endoplasmic reticulum (ER) membrane protein distantly related to the established autophagy factor vacuole membrane protein 1 (VMP1), and these two factors play related, albeit not fully overlapping, roles in autophagosome biogenesis.
203	transmembrane protein 74	TMEM74	NC_000008.11	NM_153015.3	HGNC:26409	8q23.1	TMEM74 promotes tumor cell survival by inducing autophagy via interactions with ATG16L1 and ATG9A.
204	TNF superfamily member 10	TNFSF10	NC_000003.12	NM_001190942.2	HGNC:11925	3q26	The protein encoded by this gene is a cytokine that belongs to the tumor necrosis factor (TNF) ligand family. This protein preferentially induces apoptosis in transformed and tumor cells, but does not appear to kill normal cells although it is expressed at a significant level in most normal tissues. This protein binds to several members of TNF receptor superfamily
205	tumor protein p53	TP53	NC_000017.11	NM_000546.6	HGNC:11998	17p13.1	Autophagy suppresses p53 and also p53 activates autophagy. The suppression of p53 by autophagy is important for tumor promotion and likely also for preventing tissue degeneration. Alternatively, the activation of autophagy by p53 suggests that autophagy is part of the protective function of p53.
206	tumor protein p53 inducible nuclear protein 2	TP53INP2	NC_000020.11	NM_021202.3	HGNC:16104	20q11.22	By acting as a nutrient status sensor, TP53INP2 switches its role between transcription and autophagy by changing its subcellular localization and helps the cell to cope with environmental changes.
207	tumor protein p63	TP63	NC_000003.12	NM_003722.5	HGNC:15979	3q28	TP63 acts as one of the autophagy-related genes (ARGs) in breast cancer.
208	tumor protein p73	TP73	NC_000001.11	NM_005427.4	HGNC:12003	1p36.32	TP73/p73 deficiency, promotes autophagy in CSLCs by activating the autophagy machinery involving AMPK-TSC-MTOR signaling. Mechanistically, TP73/p73 deficiency-induced autophagy occurs as a result of reduced ATP levels resulting from the metabolic perturbations within the proline regulatory axis.
209	TSC complex subunit 1	TSC1	NC_000009.12	NM_000368.5	HGNC:12362	9q34	Tuberous sclerosis complex (TSC) is an autosomal dominant genetic disorder caused by germline mutations in TSC1 or TSC2 genes, which leads to the hyperactivation of the mTORC1 pathway, an important negative regulator of autophagy.
210	TSC complex subunit 2	TSC2	NC_000016.10	NM_000548.5	HGNC:12363	16p13.3	Tuberous sclerosis complex (TSC) is an autosomal dominant genetic disorder caused by germline mutations in TSC1 or TSC2 genes, which leads to the hyperactivation of the mTORC1 pathway, an important negative regulator of autophagy.
211	tumor suppressor candidate 1	TUSC1	NC_000009.12	NM_001004125.3	HGNC:31010	9p21.2	TUSC1 tumor suppressor candidate 1 (TUSC1) is a putative tumor suppressor gene. This gene is located within the region of chromosome 9p that harbors tumor suppressor genes critical in carcinogenesis.
212	unc-51 like autophagy activating kinase 1	ULK1	NC_000012.12	NM_003565.4	HGNC:12558	12q24.33	Initiation and regulation of autophagy.
213	unc-51 like autophagy activating kinase 2	ULK2	NC_000017.11	NM_014683.4	HGNC:13480	17p11.2	Initiation and regulation of autophagy.
214	unc-51 like kinase 3	ULK3	NC_000015.10	NM_015518.1	HGNC:19703	15q24.1	Serine/threonine protein kinase that acts as a regulator of Sonic hedgehog (SHH) signaling and autophagy.
215	ubiquitin specific peptidase 10	USP10	NC_000016.10	NM_001272075.2	HGNC:12608	16q24.1	USP10 has also been shown to enhance autophagy by deubiquitinating beclin-1, a component of class-III PI3K complexes that catalyze the formation of phosphatidylinositol 3-phosphate at both autophagy initiation and autophagosome maturation steps
216	UV radiation resistance associated	UVRAG	NC_000011.10	NM_003369.4	HGNC:12640	11q13.5	This gene complements the ultraviolet sensitivity of xeroderma pigmentosum group C cells and encodes a protein with a C2 domain. The protein activates the Beclin1-PI(3)KC3 complex, promoting autophagy and suppressing the proliferation and tumorigenicity of human colon cancer cells.
217	vesicle associated membrane protein 3	VAMP3	NC_000001.11	NM_004781.4	HGNC:12644	1p36.23	VAMP3 regulates amphisome formation by controlling the fusion between multivesicular bodies and autophagosomes and participates in autophagy by the fusion of ATG9-containing vesicles.
218	vesicle associated membrane protein 7	VAMP7	NC_000023.11/NC_000024.10	NM_005638.6	HGNC:11486	Xq28 and Yq12	VAMP7 is required for autophagosome biogenesis and lysosome fusion events.
219	vascular endothelial growth factor A	VEGFA	NC_000006.12	NM_001025366.3	HGNC:12680	6p21.1	VEGF/AMPK pathway regulates autophagy in endothelial cells and stimulates autophagy, contributes to the pro-angiogenic function of this pathway. VEGF leads to transient induction of autophagy in endothelial cells via sequential activation of AMPK and mTOR pathways leading to consecutive phosphorylation of ULK1 at activating (S556) and inhibiting (S758) sites.
220	vacuole membrane protein 1	VMP1/TMEM49	NC_000017.11	NM_030938.5	HGNC:29559	17q23.1	Required for autophagosome formation: participates in early stages of autophagosome biogenesis at the endoplasmic reticulum (ER) membrane by reequilibrating the leaflets of the ER as lipids are extracted by ATG2 (ATG2A or ATG2B) to mediate autophagosome assembly
221	WD repeat and FYVE domain containing 3	WDFY3	NC_000004.12	NM_014991.6	HGNC:20751	4q21.23	Required for selective macroautophagy . Acts as an adapter protein by linking specific proteins destined for degradation to the core autophagic machinery members, such as the ATG5-ATG12-ATG16L E3-like ligase, SQSTM1 and LC3.
222	WD repeat domain 45	WDR45	NC_000023.11	NM_007075.4	HGNC:28912	Xp11.23	Along with p62/SQSTM1, involved in the formation and autophagic degradation of cytoplasmic ubiquitin-containing inclusions (p62 bodies, ALIS/aggresome-like induced structures). Along with SQSTM1, required to recruit ubiquitinated proteins to PML bodies in the nucleus
223	WD repeat domain 45B	WDR45B/WDR45L	NC_000017.11	NM_019613.4	HGNC:25072	17q25.3	Component of the autophagy machinery that controls the major intracellular degradation process by which cytoplasmic materials are packaged into autophagosomes and delivered to lysosomes for degradation. Binds phosphatidylinositol 3-phosphate (PtdIns3P), and other phosphoinositides including PtdIns(3,5)P2, forming on membranes of the endoplasmic reticulum upon activation of the upstream ULK1 and P…
224	WD repeat domain, phosphoinositide interacting 1	WIPI1	NC_000017.11	NM_017983.7	HGNC:25471	17q24.2	Component of the autophagy machinery that controls the major intracellular degradation process by which cytoplasmic materials are packaged into autophagosomes and delivered to lysosomes for degradation. Binds phosphatidylinositol 3-phosphate (PtdIns3P), and maybe other phosphoinositides including PtdIns3,5P2 and PtdIns5P, and is recruited to phagophore assembly sites at the endoplasmic reticulum …
225	WD repeat domain, phosphoinositide interacting 2	WIPI2	NC_000007.14	NM_015610.4	HGNC:32225	7p22.1	Component of the autophagy machinery that controls the major intracellular degradation process by which cytoplasmic materials are packaged into autophagosomes and delivered to lysosomes for degradation. Once activated, WIPI2 recruits at phagophore assembly sites the ATG12-ATG5-ATG16L1 complex that directly controls the elongation of the nascent autophagosomal membrane.
226	zinc finger FYVE-type containing 1	ZFYVE1	NC_000014.9	NM_021260.4	HGNC:13180	14q24.2	Binds to phosphatidylinositol 3-phosphate (PtdIns3P) through FYVE-type zinc finger
*Coding sequences of the highlighted genes were not found
