# Supplementary material for: Analysis of the Compositional Features and Codon Usage Pattern of Genes Involved in Human Autophagy
Source: Cells. 2022 Oct 12;11(20):3203. doi: 10.3390/cells11203203 (PMC9601114; doi:10.3390/cells11203203)
Supplement: Supplementary file 1 [file cells-11-03203-s001.zip › Supplementary Table S2.pdf]

**Supplementary Table S2.** Coding sequences (CDS) of all the included 224 human autophagy genes.

>|cl|NM\_017749.3\_cds\_NP\_060219.2\_1 [gene=AMBRA1] [db\_xref=CCDS:CCDS31475.1]  
[protein=activating molecule in BECN1-regulated autophagy protein 1 isoform 2]  
[protein\_id=NP\_060219.2] [location=361..3987] [gbkey=CDS]

ATGAAGGTTGTCCCAGAAAAGAATGCTGTCCGGATACTCTGGGGGCGAGAACGGGGTGCTCGGGCCATGG  
GAGCTCAGCGGCTTCTGCAGGAGCTGGTAGAAGATAAAACCCGGTGGATGAAATGGGAGGGCAAGAGAGT  
AGAACTGCCGGATAGTCCACGCTCTACCTTCTATTGGCCTTCAGCCCAGACAGGACTCTCTTAGCCTCC  
ACCCATGTGAACCATAATATCTATATTACGGAGGTGAAGACTGGCAAGTGTGTTCAATCCCTGATTGGAC  
ACCGCCGTACTCCATGGTGTGTCACTTTTCATCCCACCATCTCAGGCCTTATTGCTTCTGGCTGCCTAGA  
TGGGGAGGTTAGGATTTGGGATTTACACGGTGGCAGTGAAAGCTGGTTCACAGATAGCAACAATGCCATT  
GCCTCCCTGGCTTTCCACCCTACGGCTCAGCTCCTGCTGATTGCCACTGCCAATGAGATCCACTTCTGGG  
ACTGGAGTCGACGGGAACCCTTTGCTGTGGTGAAGACAGCTAGTGAGATGGAACGGGTCCGTCTGGTGAG  
ATTTGATCCACTTGGACTIONACTTACTCACAGCAATTGTTAACCCCTCTAATCAACAGGGTGATGACGAA  
CCAGAGATCCCCATAGATGGAACAGAATTATCCCACTACCGTCAGCGTGCCCTCCTGCAATCACAGCCAG  
TTCGCCGGACGCCTCTCCTCCACAATTTCTGCACATGCTGTCCTCCCGCTCTTCTGGCATCCAGACCGA  
GCCCTTCATCCCCCGGAGCAGGCCTCGTCAACGCAGCAGGACCAGGGCCTCCTGAACCGGCCGTCTGCC  
TTCAGTACAGTCCAGAGCAGCACTGCCGGCAACACGCTCCGCAACCTCAGTCTGGGTCTACCCGCCGCT  
CTTTGGGAGGGCCTCTGTCTAGCCACCCTTCTAGGTATCACCGAGAAATAGCTCCTGGGTTGACAGGATC  
TGAGTGGACCCGGACAGTACTCAGTCTGAACTCCCGCTCTGAGGCGGAATCCATGCCCCGCCGAGAAC  
AGTGCCTCTTCGGTGAGTTTGCTGTCTGTGCTGAGACAGCAGGAAGGTGGCTCTCAGGCATCTGTGTACA  
CTTCAGCCACAGAAGGGAGGGGTTTTCCGGCATCAGGGTTGGCAACTGAGTCAGATGGAGGGAATGGCTC  
CAGCCAAAACAACCTCGGGCAGCATTGCCATGAGCTTCAGTGTGACCTGAGACGCTTCTTTCTGGAGTAT  
GACCGGCTTCAGGAGCTGGATCAGAGCCTGAGTGGGGAAGCTCCCCAGACCCAACAGGCCCCAGGAAATGC  
TCAACAATAACATTGAATCTGAGAGGCCAGGCCCTTCCACCAGCCCACCCACACAGCAGTGAGAACAA  
CTCCAACCTGTCCCGTGGCCACCTGAATCGCTGTCGTGCTTGCCACAATCTCCTGACCTTCAACAACGAT

ACCCTGCGCTGGGAAAGAACCACACCTAACTACTCCTCTGGCGAGGCTAGTTCCTCTTGGCAGGTCCCCA  
GCTCCTTTGAGAGTGTGCCATCAAGTGGCAGCCAGTTGCCACCTCTCGAGCGGACTGAGGGCCAAACGCC  
CAGCTCCAGCAGGCTGGAGTTGAGCAGCTCTGCTAGTCCGCAGGAGGAGAGGACTGTGGGGGTGGCCTTT  
AACCAGGAGACAGGCCACTGGGAAAGAATTTACACCCAGTCCAGCAGATCTGGAACTGTGTCACAGGAGG  
CCTTACATCAGGATATGCCTGAGGAGAGCTCTGAGGAGGATTCAGGAGGAGGCTGCTGGAATCTTC  
CCTCATTTTATTATCCCGTTATGATGGAGCAGGATCCAGAGAGCACCCAATTTACCCAGACCCAGCGAGA  
TTATCTCCTGCTGCATACTACGCCAGAGGATGATCCAGTATCTCTACGGAGAGACAGTATTCGCCAGC  
GCTCCATGCGCTACCAACAGAACCGTCTCCGTTCTTCCACCTCCTCCTTCTCCTCAGACAACCAGGGTCC  
ATCAGTAGAGGGAACCGACTTGGAATTTGAGGACTTTGAGGACAATGGTGACAGATCCAGGCACCGAGCT  
CCACGCAATGCCCCGGATGTCTGCACCTTCGCTTGACGCTTTGTCCCAAGGCGTTTCTTGCTGCCTGAGT  
ACTTGCCTTATGCTGGGATTTTTATGAACGTGGACAGCCTGGCTTGGCTACTCACTCTTCTGTAAACAG  
GGTCCTGGCAGGGGCAGTGATCGGTGATGGACAGTCTGCTGTGGCCAGTAACATTGCCAATACTACCTAC  
CGGCTCCAGTGGTGGGACTTCACTAAGTTTGACCTCCCTGAAATCAGTAATGCTTCCGTGAATGTGCTGG  
TGCAGAACTGCAAGATCTACAATGATGCCAGCTGTGACATTTCTGCAGATGGCCAGCTCCTGGCAGCTTT  
CATCCCCAGCAGCCAGAGGGGCTTTCTGATGAAGGCATCCTGGCAGTGTAATCCCTGGCCCCCATAAC  
CTGGGCGAAATGCTCTACACCAAGCGATTTGGTCCCAATGCCATTTGGTGAGCCTGTCCCCAATGGGCA  
GATATGTAATGGTGGGCTTGGCCTCACGAAGGATCCTGCTGCACCCCTCCACAGAGCACATGGTGGCCCA  
GGTCTTCAGGCTGCAACAGGCCCATGGTGGAGAGACCTCCATGAGGAGAGTTTTCAACGTCCTTTATCCC  
ATGCCTGCCGACCAGCGGAGACATGTCAGTATCAACTCTGCCCGTTGGCTGCCTGAGCCAGGGCTTGGCT  
TGGCCTATGGTACTAACAAAGGAGACCTGGTGATCTGCCGACCAGAGGCCTTAAACTCTGGTGTTGAGTA  
CTACTGGGACCAGCTGAACGAGACGGTCTTCACTGTCCATTCCAACAGCAGGAGCAGCGAGCGGCCTGGA  
ACCAGCAGAGCCACATGGAGGACAGACAGAGACATGGGGCTGATGAATGCCATTGGGCTTCAGCCCCGGA  
ACCCTGCCACCTCAGTGACATCTCAGGGCACCCAGACTCTGGCCCTTCAGCTGCAGAATGCCGAAACACA  
GACTGAGAGGGAGGTGCCGGAGCCAGGGACAGCCGCCTCAGGTCCTGGTGAAGGTGAGGGTTCAGAGTAT  
GGTGCCAGTGGAAGATGCGCTCAGCAGGATCCAGAGGCTGATGGCGGAGGGCGGCATGACAGCCGTGG

TGCAGCGGGAGCAGAGCACCACCATGGCCTCCATGGGCGGCTTCGGCAACAACATCATCGTCAGCCACCG  
CATTCACCGCAGCTCTCAGACGGGCACTGAACCTGGTGCCGCCACACCTCCTCACCCCAGCCCTCCACC  
TCTCGGGGACTGCTCCCAGAGGCCGGGCAACTGGCAGAGCGAGGCCTAAGCCCCGGACAGCTTCCTGGG  
ACCAGCCTGGTACCCCTGGGCGGGAGCCAACCCAGCCAACCCTGCCCTCTTCTCCCCTGTCCCCATTCC  
TGTTTCCCTTCCCAGCGCTGAGGGACCAACCCTCCACTGCGAGTTGACCAATAACAACCACCTTCTGGAT  
GGTGGCAGCAGCAGGGGGGACGCTGCAGGCCCTAGGGGAGAACCACGGAACAGGTAG

>|cl|NM\_145343.3\_cds\_NP\_663318.1\_1 [gene=APOL1] [db\_xref=CCDS:CCDS13925.1]  
[protein=apolipoprotein L1 isoform b precursor] [protein\_id=NP\_663318.1] [location=213..1457]  
[gbkey=CDS]

ATGAGATTCAAAGCCACACTGTGGAATTGAGGAGGCCCTGCAGCGACATGGAGGGAGCTGCTTTGCTGA  
GAGTCTCTGTCCTCTGCATCTGGATGAGTGCACTTTTCCTTGGTGTGGGAGTGAGGGCAGAGGAAGCTGG  
AGCGAGGGTGCAACAAAACGTTCCAAGTGGGACAGATACTGGAGATCCTCAAAGTAAGCCCCTCGGTGAC  
TGGGCTGCTGGCACCATGGACCCAGAGAGCAGTATCTTTATTGAGGATGCCATTAAGTATTTCAAGGAAA  
AAGTGAGCACACAGAATCTGCTACTCCTGCTGACTGATAATGAGGCCTGGAACGGATTCTGTGGCTGCTGC  
TGAAGTGGCCAGGAATGAGGCAGATGAGCTCCGTAAAGCTCTGGACAACCTTGCAAGACAAATGATCATG  
AAAGACAAAAACTGGCACGATAAAGGCCAGCAGTACAGAACTGGTTTCTGAAAGAGTTTCCTCGGTTGA  
AAAGTGAGCTTGAGGATAACATAAGAAGGCTCCGTGCCCTTGAGATGGGGTTCAGAAGGTCCACAAAGG  
CACCACCATCGCCAATGTGGTGTCTGGCTCTCTCAGCATTTCTCTGGCATCCTGACCCTCGTCGGCATG  
GGTCTGGCACCTTCACAGAGGGAGGCAGCCTTGACTCTTGGAACCTGGGATGGAGTTGGGAATCACAG  
CCGCTTTGACCGGGATTACCAGCAGTACCATGGACTACGGAAAGAAGTGGTGGACACAAGCCCAAGCCCA  
CGACCTGGTCATCAAAGCCTTGACAAATTGAAGGAGGTGAGGGAGTTTTTGGGTGAGAACATATCCAAC

TTTCTTTCTTAGCTGGCAATACTTACCAACTCACACGAGGCATTGGGAAGGACATCCGTGCCCTCAGAC  
GAGCCAGAGCCAATCTTCAGTCAGTACCGCATGCCTCAGCCTCACGCCCCGGGTCACTGAGCCAATCTC  
AGCTGAAAGCGGTGAACAGGTGGAGAGGGTTAATGAACCCAGCATCCTGGAAATGAGCAGAGGAGTCAAG  
CTCACGGATGTGGCCCCTGTAAGCTTCTTTCTTGTGCTGGATGTAGTCTACCTCGTGACGAATCAAAGC  
ACTTACATGAGGGGGCAAAGTCAGAGACAGCTGAGGAGCTGAAGAAGGTGGCTCAGGAGCTGGAGGAGAA  
GCTAAACATTCTCAACAATAATTATAAGATTCTGCAGGCGGACCAAGAAGTGTGA

>|cl|NM\_001197325.2\_cds\_NP\_001184254.1\_1 [gene=ARNT]  
[db\_xref=GeneID:405,HGNC:HGNC:700,MIM:126110] [protein=aryl hydrocarbon receptor nuclear  
translocator isoform 4] [protein\_id=NP\_001184254.1] [location=33..2354] [gbkey=CDS]  
ATGGCGGCGACTACTGCCAACCCCGAAATGACATCAGATGTACCATCACTGGGTCCAGCCATTGCCTCTG  
GAAACTCTGGACCTGGAATTCAAGGTGGAGGAGCCATTGTCCAGAGGGCTATTAAGCGGCGACCAGGGCT  
GGATTTTGATGATGATGGAGAAGGGAACAGTAAATTTTGAGGTGTGATGATGATCAGATGTCTAACGAT  
AAGGAGCGGTTTGCCAGGGAAAATCACAGTGAAATTGAACGGCGGCGACGGAACAAGATGACAGCCTACA  
TCACAGAACTGTCAGATATGGTACCCACCTGTAGTGCCCTGGCTCGAAAACCAGACAAGCTAACCATCTT  
ACGCATGGCAGTTTCTCACATGAAGTCCTTGCGGGGAAGTGGCAACACATCCACTGATGGCTCCTATAAG  
CCGTCTTTCCTCACTGATCAGGAACTGAAACATTTGATCTTGGAGGCAGCAGATGGCTTTCTGTTTATTG  
TCTCATGTGAGACAGGCAGGGTGGTGTATGTGTCTGACTCCGTGACTCCTGTTTTGAACCAGCCACAGTC  
TGAATGGTTTGGCAGCACACTCTATGATCAGGTGCACCCAGATGATGTGGATAAACTTCGTGAGCAGCTT  
TCCAATTGAGAAAATGCCCTGACAGGGCGTATCCTGGATCTAAAGACTGGAACAGTGAAAAAGGAAGGTC  
AGCAGTCTTCATGAGAATGTGTATGGGCTCAAGGAGATCGTTTATTTGCCGAATGAGGTGTGGCAGTAG  
CTCTGTGGACCCAGTTTCTGTGAATAGGCTGAGCTTTGTGAGGAACAGATGCAGGAATGGACTTGGCTCT

GTAAAGGATGGGGAACCTCACTTCGTGGTGGTCCACTGCACAGGCTACATCAAGGCCTGGCCCCCAGCAG  
GTGTTTCCCTCCCAGATGATGACCCAGAGGCTGGCCAGGGAAGCAAGTTTTGCCTAGTGGCCATTGGCAG  
ATTGCAGGTAAGTAGTTCTCCCAACTGTACAGACATGAGTAATGTTTGTCAACCAACAGAGTTCATCTCC  
CGACACAACATTGAGGGTATCTTCACTTTTGTGGATCACCGCTGTGTGGCTACTGTTGGCTACCAGCCAC  
AGGAACTCTTAGGAAAGAATATTGTAGAATTCTGTCATCCTGAAGACCAGCAGCTTCTAAGAGACAGCTT  
CCAACAGGTAAGTAAATTAAGGCAAGTGCTGTCTGTCATGTTCCGGTTCCGGTCTAAGAACCAAGAA  
TGGCTCTGGATGAGAACCAGCTCCTTTACTTTCCAGAACCCTTACTCAGATGAAATTGAGTACATCATCT  
GTACCAACACCAATGTGAAGAACTCTAGCCAAGAACCACGGCCTACACTCTCCAACACAATCCAGAGGCC  
ACAAGTAGGTCCCACAGCTAATTTACCCCTGGAGATGGGCTCAGGACAGCTGGCACCCAGGCAGCAGCAA  
CAGCAAACAGAATTGGACATGGTACCAGGAAGAGATGGACTGGCCAGCTACAATCATTCCCAGGTGGTTC  
AGCCTGTGACAACCACAGGACCAGAACACAGCAAGCCCCTTGAGAAGTCAGATGGTTTATTGCCCAGGA  
TAGAGATCCAAGATTTTCAGAAATCTATCACAACATCAATGCGGATCAGAGTAAAGGCATCTCCTCCAGC  
ACTGTCCCTGCCACCCAACAGCTATTCTCCAGGGCAACACATTCCCTCCTACCCCCGGCCGGCAGAGA  
ATTCAGGAATAGTGGCCTAGCCCCTCCTGTAACCATTGTCCAGCCATCAGCTTCTGCAGGACAGATGTT  
GGCCCAGATTTCCCGCCACTCCAACCCCAAGGAGCAACCCCAACTTGGACCCCTACTACCCGCTCA  
GGCTTTTCTGCCCAGGTGGCTACCCAGGCTACTGCTAAGACTCGTACTTCCCAGTTTGGTGTGGGCAGCT  
TTCAGACTCCATCCTCCTTCAGCTCCATGTCCCTCCCTGGTGCCCCAACTGCATCGCCTGGTGCTGCTGC  
CTACCCTAGTCTCACCAATCGTGGATCTAACTTTGCTCCTGAGACTGGACAGACTGCAGGACAATTCCAG  
ACACGGACAGCAGAGGGTGTGGGTGTCTGGCCACAGTGGCAGGGCCAGCAGCCTCATCATCGTTCAAGTT  
CTAGTGAGCAACATGTTCAACAACCGCCAGCACAGCAACCTGGCCAGCCTGAGGTCTTCCAGGAGATGCT  
GTCCATGCTGGGAGATCAGAGCAACAGCTACAACAATGAAGAATCCCTGATCTAACTATGTTTCCCCC  
TTTCAGAATAG

>|cl|NM\_000487.6\_cds\_NP\_000478.3\_1 [gene=ARSA] [db\_xref=CCDS:CCDS14100.2]  
[protein=arylsulfatase A isoform a precursor] [protein\_id=NP\_000478.3] [location=374..1903]  
[gbkey=CDS]

ATGTCCATGGGGGCACCGCGGTCCCTCCTCCTGGCCCTGGCTGCTGGCCTGGCCGTTGCCCGTCCGCCCA  
ACATCGTGCTGATCTTTGCCGACGACCTCGGCTATGGGGACCTGGGCTGCTATGGGCACCCCAGCTCTAC  
CACTCCCAACCTGGACCAGCTGGCGGCGGGAGGGCTGCGGTTACAGACTTCTACGTGCCTGTGTCTCTG  
TGCACACCCTCTAGGGCCGCCCTCCTGACCGGCCGGCTCCCGGTTCCGATGGGCATGTACCCTGGCGTCC  
TGGTGCCAGCTCCCGGGGGGGCCTGCCCTGGAGGAGGTGACCGTGGCCGAAGTCTGGCTGCCCGAGG  
CTACCTCACAGGAATGGCCGGCAAGTGGCACCTTGGGGTGGGGCCTGAGGGGGCCTTCCTGCCCCCCCAT  
CAGGGCTTCCATCGATTTCTAGGCATCCCGTACTCCACGACCAGGGCCCCCTGCCAGAACCTGACCTGCT  
TCCCGCCGGCCACTCCTTGCGACGGTGGCTGTGACCAGGGCCTGGTCCCCATCCCACTGTTGGCCAACT  
GTCCGTGGAGGCGCAGCCCCCTGGCTGCCCGGACTAGAGGCCCGCTACATGGCTTTCGCCCATGACCTC  
ATGGCCGACGCCAGCGCCAGGATCGCCCCCTTCTCCTGTACTATGCCTCTCACCACACCCACTACCCTC  
AGTTCAGTGGGCAGAGCTTTGCAGAGCGTTCAGGCCGCGGGCCATTTGGGGACTCCCTGATGGAGCTGGA  
TGCAGCTGTGGGGACCCTGATGACAGCCATAGGGGACCTGGGGCTGCTTGAAGAGACGCTGGTCATCTTC  
ACTGCAGACAATGGACCTGAGACCATGCGTATGTCCCGAGGCGGCTGCTCCGGTCTCTTGCGGTGTGGAA  
AGGGAACGACCTACGAGGGCGGTGTCCGAGAGCCTGCCTTGGCCTTCTGGCCAGGTCATATCGCTCCCGG  
CGTGACCCACGAGCTGGCCAGCTCCCTGGACCTGCTGCCTACCCTGGCAGCCCTGGCTGGGGCCCCACTG  
CCCAATGTCACCTTGATGGCTTTGACCTCAGCCCCCTGCTGCTGGGCACAGGCAAGAGCCCTCGGCAGT  
CTCTCTTCTTACCCGTCCTACCCAGACGAGGTCCGTGGGGTTTTTGTGTGCGGACTGGAAAGTACAA  
GGCTCACTTCTTACCCAGGGCTCTGCCACAGTGATACTGCAGACCCTGCCTGCCACGCCTCCAGC  
TCTCTGACTGCTCATGAGCCCCGCTGCTCTATGACCTGTCCAAGGACCCTGGTGAGAACTACAACCTGC  
TGGGGGGTGTGGCCGGGGCCACCCAGAGGTGCTGCAAGCCCTGAAACAGCTTCAGCTGCTCAAGGCCCA  
GTTAGACGCAGCTGTGACCTTCGGCCCCAGCCAGGTGGCCCGGGGCGAGGACCCCGCCCTGCAGATCTGC

TGTCATCCTGGCTGCACCCCCGCCAGCTTGCTGCCATTGCCAGATCCCCATGCCTGA

>|cl|NM\_000046.5\_cds\_NP\_000037.2\_1 [gene=ARSB] [db\_xref=CCDS:CCDS4043.1]  
[protein=arylsulfatase B isoform 1 precursor] [protein\_id=NP\_000037.2] [location=63..1664]  
[gbkey=CDS]

ATGGGTCCGCGCGGCGGCGGCGAGCTTGCCCCGAGGCCCGGACCTCGGCGGCTGCTCCTCCCCGTCTGCC  
TCCCGCTGCTGCTGCTGCTGTTGTTGGCGCCGCCGGGCTCGGGCGCCGGGGCCAGCCGGCCGCCACCT  
GGTCTTCTTGCTGGCAGACGACCTAGGCTGGAACGACGTCGGCTTCCACGGCTCCCGCATCCGCACGCCG  
CACCTGGACGCGCTGGCGGCCGGCGGGGTGCTCCTGGACAATACTACACGCAGCCGCTGTGCACGCCGT  
CGCGGAGCCAGCTGCTCACTGGCCGCTACCAGATCCGTACAGGTTTACAGCACCAAATAATCTGGCCCTG  
TCAGCCCAGCTGTGTTCTCTGGATGAAAACTCCTGCCCCAGCTCCTAAAAGAAGCAGGTTATACTACC  
CATATGGTCGGAAAATGGCACCTGGGAATGTACCGGAAAGAATGCCTTCCAACCCGCCGAGGATTTGATA  
CCTACTTTGGATATCTCCTGGGTAGTGAAGATTATTATCCCATGAACGCTGTACATTAATTGACGCTCT  
GAATGTCACACGATGTGCTCTTGATTTTCGAGATGGCGAAGAAGTTGCAACAGGATATAAAAAATATGTAT  
TCAACAAACATATTCACCAAAAGGGCTATAGCCCTCATAACTAACCATCCACCAGAGAAGCCTCTGTTTC  
TCTACCTTGCTCTCCAGTCTGTGCATGAGCCCCTTCAGGTCCCTGAGGAATACTTGAAGCCATATGACTT  
TATCCAAGACAAGAACAGGCATCACTATGCAGGAATGGTGTCCCTTATGGATGAAGCAGTAGGAAATGTC  
ACTGCAGCTTTAAAAAGCAGTGGGCTCTGGAACAACACGGTGTTTCATCTTTTCTACAGATAACGGAGGGC  
AGACTTTGGCAGGGGGTAATAACTGGCCCCCTTCGAGGAAGAAAATGGAGCCTGTGGGAAGGAGGCGTCCG  
AGGGGTGGGCTTTGTGGCAAGCCCCTTGCTGAAGCAGAAGGGCGTGAAGAACCGGGAGCTCATCCACATC  
TCTGACTGGCTGCCAACACTCGTGAAGCTGGCCAGGGGACACACCAATGGCACAAAGCCTCTGGATGGCT  
TCGACGTGTGGAACCATCAGTGAAGGAAGCCATCCCCAGAATTGAGCTGCTGCATAATATTGACCC

GAACTTCGTGGACTCTTCACCGTGTCCCAGGAACAGCATGGCTCCAGCAAAGGATGACTCTTCTCTTCCA  
GAATATTCAGCCTTTAACACATCTGTCCATGCTGCAATTAGACATGGAAATTGGAACTCCTCACGGGCT  
ACCCAGGCTGTGGTTACTGGTTCCTCCACCGTCTCAATACAATGTTTCTGAGATACCCTCATCAGACCC  
ACCAACCAAGACCCTCTGGCTCTTTGATATTGATCGGGACCCTGAAGAAAGACATGACCTGTCCAGAGAA  
TATCCTCACATCGTCACAAAGCTCCTGTCCCGCCTACAGTTCTACCATAAACTCAGTCCCCGTGTACT  
TCCCTGCACAGGACCCCGCTGTGATCCCAAGGCCACTGGGGTGTGGGGCCCTTGGATGTAG

>|cl|NM\_001675.4\_cds\_NP\_001666.2\_1 [gene=ATF4] [db\_xref=CCDS:CCDS13996.1] [protein=cyclic  
AMP-dependent transcription factor ATF-4] [protein\_id=NP\_001666.2] [location=888..1943]  
[gbkey=CDS]

ATGACCGAAATGAGCTTCTGAGCAGCGAGGTGTTGGTGGGGGACTTGATGTCCCCCTTCGACCAGTCGG  
GTTTGGGGGCTGAAGAAAGCCTAGGTCTCTTAGATGATTACCTGGAGGTGGCCAAGCACTTCAAACCTCA  
TGGGTTCTCCAGCGACAAGGCTAAGGCGGGCTCTCCGAATGGCTGGCTGTGGATGGGTTGGTCAGTCCC  
TCCAACAACAGCAAGGAGGATGCCTTCTCCGGGACAGATTGGATGTTGGAGAAAATGGATTGAAGGAGT  
TCGACTTGGATGCCCTGTTGGGTATAGATGACCTGGAAACCATGCCAGATGACCTTCTGACCACGTTGGA  
TGACACTTGTGATCTCTTTGCCCCCTAGTCCAGGAGACTAATAAGCAGCCCCCAGACGGTGAACCCA  
ATTGGCCATCTCCCAGAAAGTTTAACAAAACCCGACCAGGTTGCCCCCTTCACCTTCTTACAACCTCTTC  
CCCTTCCCCAGGGGTCCTGTCTCCACTCCAGATCATTCTTTAGTTTAGAGCTGGGCAGTGAAGTGGA  
TATCACTGAAGGAGATAGGAAGCCAGACTACACTGCTTACGTTGCCATGATCCCTCAGTGCATAAAGGAG  
GAAGACACCCCTTCAGATAATGATAGTGGCATCTGTATGAGCCCAGAGTCCTATCTGGGGTCTCCTCAGC  
ACAGCCCCTCTACCAGGGGCTCTCCAAATAGGAGCCTCCCATCTCCAGGTGTTCTCTGTGGGTCTGCCCCG  
TCCCAAACCTTACGATCCTCTGGAGAGAAGATGGTAGCAGCAAAAGTAAAGGGTGAGAACTGGATAAG

AAGCTGAAAAAATGGAGCAAAACAAGACAGCAGCCACTAGGTACCGCCAGAAGAAGAGGGCGGAGCAGG  
AGGCTCTTACTGGTGAGTGCAAAGAGCTGGAAAAGAAGAACGAGGCTCTAAAAGAGAGGGCGGATTCCCT  
GGCCAAGGAGATCCAGTACCTGAAAGATTGATAGAAGAGGTCCGCAAGGCAAGGGGGAAGAAAAGGGTC  
CCCTAG

>|cl|NM\_007348.4\_cds\_NP\_031374.2\_1 [gene=ATF6] [db\_xref=CCDS:CCDS1235.1] [protein=cyclic AMP-  
dependent transcription factor ATF-6 alpha] [protein\_id=NP\_031374.2] [location=42..2054] [gbkey=CDS]

ATGGGGGAGCCGGCTGGGGTTGCCGGCACCATGGAGTCACCTTTAGCCCGGGACTCTTTCACAGGCTGG  
ATGAAGATTGGGATTCTGCTCTCTTTGCTGAACTCGGTTATTTACAGACACTGATGAGCTGCAATTGGA  
AGCAGCAAATGAGACGTATGAAAACAATTTTGATAATCTTGATTTTGATTTGGATTTGATGCCTTGGGAG  
TCAGACATTTGGGACATCAACAACCAATCTGTACAGTTAAAGATATTAAGGCAGAACCTCAGCCACTTT  
CTCCAGCCTCCTCAAGTTATTCAGTCTCGTCTCCTCGGTCAGTGGACTCTTATTCTTCAACTCAGCATGT  
TCCTGAGGAGTTGGATTTGTCTTCTAGTTCTCAGATGTCTCCCCTTTCCTTATATGGTGAAAACCTCTAAT  
AGTCTCTCTTCAGCGGAGCCACTGAAGGAAGATAAGCCTGTCACTGGTCCTAGGAACAAGACTGAAAATG  
GACTGACTCCAAAGAAAAAATTCAAGGTGAATTCAAACCTTCAATTCAGCCCAAGCCTTTATTGCTTCC  
AGCAGCACCCAAGACTCAAACAACTCCAGTGTTCCAGCAAAAACCATCATTATTCAGACAGTACCAACG  
CTTATGCCATTGGCAAAGCAGCAACCAATTATCAGTTTACAACCTGCACCCACTAAAGGCCAGACGGTTT  
TGCTGTCTCAGCCTACTGTGGTACAACCTCAAGCACCTGGAGTTCTGCCCTCTGCTCAGCCAGTCCTTGC  
TGTTGCTGGGGGAGTCACACAGCTCCCTAATCACGTGGTGAATGTGGTACCAGCCCCTTCAGCGAATAGC  
CCAGTGAATGGAAAACCTTCCGTGACTAAACCTGTCCTACAAAGTACCATGAGAAATGTCGGTTCAGATA  
TTGCTGTGCTAAGGAGACAGCAACGTATGATAAAAAATCGAGAATCCGCTTGTCAGTCTCGCAAGAAGAA  
GAAAGAATATATGCTAGGGTTAGAGGCGAGATTAAAGGCTGCCCTCTCAGAAAACGAGCAACTGAAGAAA

GAAAATGGAACACTGAAGCGGCAGCTGGATGAAGTTGTGTCAGAGAACCAGAGGCTTAAAGTCCCTAGTC  
CAAAGCGAAGAGTTGTCTGTGTGATGATAGTATTGGCATTATAATACTGAACTATGGACCTATGAGCAT  
GTTGGAACAGGATTCCAGGAGAATGAACCCTAGTGTGAGCCCTGCAAATCAAAGGAGGCACCTTCTAGGA  
TTTTCTGCTAAAGAGGCACAGGACACATCAGATGGTATTATCCAGAAAAACAGCTACAGATATGATCATT  
CTGTTTCAAATGACAAAGCCCTGATGGTGCTAACTGAAGAACCATTGCTTTACATTCTCCACCTCCTTG  
TCAGCCCCTAATTAACACAACAGAGTCTCTCAGGTAAATCATGAACTTCGAGGATGGGTTTCATAGACAT  
GAAGTAGAAAGGACCAAGTCAAGAAGAATGACAAATAATCAACAGAAAACCCGTATTCTTCAGGGTGCTC  
TGGAACAGGGCTCAAATTCTCAGCTGATGGCTGTTCAATACACAGAAACCACTAGTAGTATCAGCAGGAA  
CTCAGGGAGTGAGCTACAAGTGTATTATGCTTCACCCAGAAGTTATCAAGACTTTTTTGAAGCCATCCGC  
AGAAGGGGAGACACATTTTATGTTGTGTCATTTGAAGGGATCACCTGCTGTTACCAGCTACCACCCATA  
ACAAGACCACAAGACCAAAAATGTCAATTGTGTTACCAGCAATAAACATAAATGAGAATGTGATCAATGG  
GCAGGACTACGAAGTGATGATGCAGATTGACTGTCAGGTGATGGACACCAGGATCCTCCATATCAAAAGT  
TCGTCAGTTCCTCCTTACCTCCGAGATCAGCAGAGGAATCAAACCAACACCTTCTTTGGCTCCCCTCCCG  
CAGCCACAGAGGCAACCCACGTTGTCAGCACCATCCCTGAGTCATTACAATAG

>|cl|NM\_001131028.2\_cds\_NP\_001124500.1\_1 [gene=ATG10] [db\_xref=CCDS:CCDS4057.1]  
[protein=ubiquitin-like-conjugating enzyme ATG10] [protein\_id=NP\_001124500.1] [location=432..1094]  
[gbkey=CDS]

ATGGAAGAAGATGAGTTCATTGGAGAAAAACATTCCAACGTTATTGTGCAGAATTCATTAAACATTAC  
AACAGATAGGTGATAGTTGGGAATGGAGACCATCAAAGGACTGTTCTGATGGCTACATGTGCAAAATACA  
CTTTCAAATTAAGAATGGGTCTGTGATGTCACATCTAGGAGCATCTACCCATGGACAGACATGTCTTCCC  
ATGGAGGAGGCTTCGAGCTACCTTGGATGATTGTGAAGTGATTGAACTGCAGCAGCGTCCGAAGTGA

TTAAATATGAGTATCATGTCTTATATTCCTGTAGCTACCAAGTGCCTGTACTTTACTTTAGGGCAAGCTT  
TTTAGATGGGAGACCTTTAACTCTGAAGGACATATGGGAAGGAGTTCATGAGTGCTATAAGATGCGACTG  
CTACAGGGACCATGGGACACTATTACGCAACAGGAACATCCAATACTTGGGCAACCCTTTTTTGTACTTC  
ATCCCTGCAAGACGAATGAATTCATGACTCCTGTATTAAAGAATTCTCAGAAAATCAATAAGAATGTCAA  
CTATATCACATCATGGCTGAGCATTGTAGGGCCAGTTGTTGGGCTGAATCTACCTCTGAGTTATGCCAAA  
GCAACGTCTCAGGATGAACGAAATGTCCCTTAA

>|cl|NM\_021934.5\_cds\_NP\_068753.2\_1 [gene=ATG101] [db\_xref=CCDS:CCDS8820.1]  
[protein=autophagy-related protein 101] [protein\_id=NP\_068753.2] [location=472..1128] [gbkey=CDS]

ATGAACTGTCGCTCGGAGGTGCTGGAGGTGTCGGTGGAGGGGCGGCAGGTGGAGGAGGCCATGCTGGCTG  
TGCTGCACACGGTGCTTCTGCACCGCAGCACAGGCAAGTTCCACTACAAGAAGGAGGGCACCTACTCCAT  
TGGCACCGTGGGCACCCAGGATGTTGACTGTGACTTCATCGACTTCACTTATGTGCGTGTCTCTTCTGAG  
GAACTGGATCGTGCCCTGCGCAAGGTTGTTGGGGAGTTCAAGGATGCACTGCGCAACTCTGGTGGCGATG  
GGCTGGGGCAGATGTCCTTGAGTTCTACCAGAAGAAGAAGTCTCGCTGGCCATTCTCAGACGAGTGCAT  
CCCATGGGAAGTGTGGACGGTCAAGGTGCATGTGGTAGCCCTGGCCACGGAGCAGGAGCGGCAGATCTGC  
CGGGAGAAGGTGGGTGAGAACTCTGCGAGAAGATCATCAACATCGTGGAGGTGATGAATCGGCATGAGT  
ACTTGCCCAAGATGCCCACACAGTCGGAGGTGGATAACGTGTTTGACACAGGCTTGCGGGACGTGCAGCC  
CTACCTGTACAAGATCTCCTTCCAGATCACTGATGCCCTGGGCACCTCAGTCACCACCACCATGCGCAGG  
CTCATCAAAGACACCCTTGCCCTCTGA

>|cl|NM\_004707.4\_cds\_NP\_004698.3\_1 [gene=ATG12] [db\_xref=CCDS:CCDS4122.2] [protein=ubiquitin-like protein ATG12 isoform 1] [protein\_id=NP\_004698.3] [location=14..436] [gbkey=CDS]

ATGGCGGAGGAGCCGCAGTCTGTGTTGCAGCTTCCTACTTCAATTGCTGCTGGAGGGGAAGGACTTACGG  
ATGTCTCCCCAGAAACAACCACCCCGGAGCCCCGTCTCCGCTGCAGTTTCCCCGGGAACAGAGGAACC  
TGCTGGCGACACCAAGAAAAAATTGACATTTTGCTAAAGGCTGTGGGAGACACTCCTATTATGAAAACA  
AAGAAGTGGGCAGTAGAGCGAACACGAACCATCCAAGGACTCATTGACTTCATCAAAAAGTTTCTTAAAC  
TTGTGGCCTCAGAACAGTTGTTTATTTATGTGAATCAGTCCTTTGCTCCTTCCCAGACCAAGAAGTTGG  
AACTCTCTATGAGTGTTTTGGCAGTGATGGTAAACTGGTTTTACATTACTGCAAGTCTCAGGCGTGGGGA  
TGA

>|cl|NM\_014741.5\_cds\_NP\_055556.2\_1 [gene=ATG13] [db\_xref=CCDS:CCDS7921.1]  
[protein=autophagy-related protein 13 isoform f] [protein\_id=NP\_055556.2] [location=408..1850]  
[gbkey=CDS]

ATGGAAACTGATCTCAATTCCCAGGACAGAAAGGACCTGGACAAGTTTATTAAATTTTTGCCCTCAAGA  
CTGTCCAAGTGATTGTCCAGGCTCGGCTTGGTGAAAAGATTTGCACTCGTTCATCATCTTCTCCAACGGG  
TTCAGATTGGTTCAACTTAGCAATCAAAGACATCCCAGAGGTTACACATGAAGCAAAGAAGGCACTGGCA  
GGACAGCTGCCTGCAGTCGGGAGGTCCATGTGTGTGGAGATTTCACTTAAGACTTCTGAGGGAGATTCCA  
TGGAGCTGGAAATATGGTGTCTTGAAATGAATGAAAAGTGTGATAAAGAAATCAAAGTTTCCTACACGGT  
GTACAACAGACTGTCATTGCTGCTGAAGTCCCTTCTTGCTATACTAGGGTGACACCAGCCTATAGGCTC  
TCCAGGAAACAAGGGCATGAATATGTCATATTATACAGGATATATTTTGGAGAAGTTCAGCTGAGTGGCT  
TAGGAGAAGGCTTCCAGACAGTTCGTGTTGGGACAGTGGGCACCCCTGTGGGCACCATCACTCTTCTTG

TGCTTACAGAATTAACCTGGCATTTCATGTCTACCAGGCAATTTGAGAGGACCCACCTATCATGGGGATT  
ATTATTGATCACTTTGTGGACCGTCCCTATCCCAGCTCCTCTCCCATGCACCCCTGCAATTACAGAACTG  
CTGGTGAGGACACTGGAGTAATATACCCGTCTGTAGAAGACTCTCAAGAAGTGTGTACCACCTCTTTTTC  
CACCTCCCCACCATCCCAGCTGATGGTTCCTGGGAAGGAAGGTGGGGTACCCCTTGCTCCCAACCAGCCT  
GTCCATGGTACCCAGGCTGACCAGGAGAGACTGGCAACCTGCACCCCTTCTGACAGAACCCACTGTGCTG  
CCACACCCTCCAGTAGTGAGGATACTGAAACCGTATCAAACAGCAGTGAGGGACGGGCCTCCCCTCACGA  
TGTCTTGGAGACCATCTTTGTCCGAAAAGTGGGGGCTTTTGTCAACAAACCCATTAACCAGGTGACCCTG  
ACGAGTTTGGATATACCCTTTGCCATGTTTGTCTCCAAGAATTTGGAGCTGGAGGATACCGATCCAATGG  
TGAATCCTCCAGATTCCCCAGAGACTGAATCTCCTCTCCAGGGCAGCCTGCACTCAGATGGCTCCAGCGG  
GGGCAGCAGTGGCAATACCCATGATGACTTTGTTATGATAGACTTTAAACCAGCTTTTTCTAAAGATGAC  
ATTCTCCGATGGACCTGGGGACCTTCTATCGGGAGTTTCAGAACCCACCTCAGCTGAGCAGCCTCTCCA  
TAGATATTGGAGCACAGTCCATGGCTGAAGACTTGGACTCATTACCAGAGAAGCTGGCTGTGCATGAGAA  
GAATGTCCGCGAGTTTGATGCCTTTGTGGAAACCCTGCAGTAA

>|cl|NM\_014924.5\_cds\_NP\_055739.2\_1 [gene=ATG14] [db\_xref=CCDS:CCDS32087.1] [protein=beclin 1-  
associated autophagy-related key regulator] [protein\_id=NP\_055739.2] [location=9..1487] [gbkey=CDS]

ATGGCGTCTCCAGTGGAAGGGAGCCCGGGCGCTGGAGGCTCCTGGCTGCGGGCCCCGGCCGCTCGCCC  
GGGACCTGGTGGACTCCGTGGACGATGCGGAGGGGCTGTACGTGGCTGTGGAGCGCTGCCCGCTGTGCAA  
CACTACCCGCCGGCGGCTGACCTGCGCCAAATGCGTTCAGAGCGGCGATTTCTGTCTACTTCGACGGCCGC  
GACCGGGAGAGGTTTATCGACAAGAAGGAAAGGTTAAGCCGACTTAAGAGCAAGCAAGAAGAATTTCAGA  
AAGAAGTGTTAAAGCTATGGAAGGAAAATGGATAACAGATCAGTTGAGATGGAAAATAATGTCCTGCAA  
GATGAGGATTGAACAGTTAAACAAACAATATGTAAAGGAAATGAAGAAATGGAGAAAAATTCTGAAGGC

CTTCTCAAAACCAAGGAAAAGAATCAGAAGCTTTACAGTCGAGCACAAACGGCACCAAGAGAAAAAGGAGA  
AGATTGAGAGGCATAATCGCAAACCTTGGTGACCTGGTAGAAAAAAGACCATTGACTTAAGAAGTCATTA  
TGAGCGTCTGGCAAATCTTCGACGATCCCATATATTAGAGCTCACCTCTGTCATTTTTCCAATCGAGGAA  
GTAAAGACGGGTGTGAGAGACCCCGCAGATGTGTCTTCAGAGAGTGACAGTGCCATGACCTCCAGCACTG  
TGAGCAAGCTTGCTGAAGCCCGGAGGACAACCTTACCTCTCAGGACGATGGGTCTGTGACGATCACAACGG  
AGACACCAGCATTAGCATTACAGGGCCTTGGATTAGCCTCCCTAACAAATGGGGACTACTCTGCCTACTAC  
AGCTGGGTGGAGGAGAAGAAAACAACCCAGGGGCCTGACATGGAGCAGAGTAACCCTGCCTACACCATCA  
GTGCTGCGCTGTGCTATGCAACTCAGCTGGTCAACATTCTGTCTCATATACTTGATGTAAATCTTCCCAA  
AAAGCTCTGCAACAGTGAATTTTGTGGCGAAAATCTAAGCAAGCAGAAATTTACTCGAGCAGTGAAGAAA  
CTGAATGCAAATATTCTTTACCTTTGTTTTCTCAGCATGTAAATTTAGATCAATTACAACCACTGCATA  
CCCTCAGGAATCTAATGTACCTGGTCAGTCCAAGCTCTGAACACCTAGGCAGGTCAGGGCCCTTTGAAGT  
ACGAGCAGACCTTGAGGAGTCCATGGAATTTGTGGATCCCGGAGTTGCTGGAGAATCAGATGAGAGCGGA  
GATGAGCGCGTCAGCGATGAAGAAACCGACCTGGGCACAGACTGGGAGAACTTGCCTAGTCCCCGGTTTT  
GTGATATCCCTTCCCAGTCTGTGGAAGTCTCCCAGAGTCAGAGCACCCAGGCGTCCCCACCCATCGCGAG  
CAGCAGTGCAGGTGGGATGATCTCCTCTGCAGCAGCCTCGGTGACCTCCTGGTTTAAAGCTTACACTGGA  
CACCGTTAA

>|cl|NM\_017974.4\_cds\_NP\_060444.3\_1 [gene=ATG16L1] [db\_xref=CCDS:CCDS2502.2]  
[protein=autophagy-related protein 16-1 isoform 2] [protein\_id=NP\_060444.3] [location=156..1922]  
[gbkey=CDS]

ATGTCGTCGGGCCTCCGCGCCGCTGACTTCCCCGCTGGAAGCGCCACATCTCGGAGCAACTGAGGCGCC  
GGGACCGGCTGCAGAGACAGGCGTTCGAGGAGATCATCCTGCAGTATAACAAATTGCTGGAAAAGTCAGA

TCTTCATTCAAGTGTGGCCAGAACTACAGGCTGAAAAGCATGACGTACCAAACAGGCACGAGATAAGT  
CCCGGACATGATGGCACATGGAATGACAATCAGCTACAAGAAATGGCCCACTGAGGATTAAGCACCAAG  
AGGAACTGACTGAATTACACAAGAAACGTGGGGAGTTAGCTCAACTGGTGATTGACCTGAATAACCAAAT  
GCAGCGGAAGGACAGGGAGATGCAGATGAATGAAGCAAAAATTGCAGAATGTTTGCAGACTATCTCTGAC  
CTGGAGACGGAGTGCCTAGACCTGCGCACTAAGCTTTGTGACCTTGAAAGAGCCAACCAGACCCTGAAGG  
ATGAATATGATGCCCTGCAGATCACTTTTACTGCCTTGGAGGGAAAAGTGGAGAAAAGTACGGAAGAGAA  
CCAGGAGCTGGTCACCAGATGGATGGCTGAGAAAGCCAGGAAGCCAATCGGCTTAATGCAGAGAATGAA  
AAAGACTCCAGGAGGCGGCAAGCCCGGCTGCAGAAAGAGCTTGAGAAGCAGCAAAGGAACCTCTACCAG  
TCGAACAGGATGATGACATTGAGGTCATTGTGGATGAACTTCTGATCACACAGAAGAGACCTCTCCTGT  
GCGAGCCATCAGCAGAGCAGCCACGAGACGCTCTGTCTTCTTCCCAGTCCCCAGGACAATGTGGAT  
ACTCATCCTGGTTCTGGTAAAGAAAGTGAAGGTACCAGCTACTGCCTTGTGTGTCTTCGATGCACATGATG  
GGGAAGTCAACGCTGTGCAGTTCAGTCCAGGTTCCCGGTTACTGGCCACTGGAGGCATGGACCGCAGGGT  
TAAGCTTTGGGAAGTATTTGGAGAAAAATGTGAGTTCAAGGGTTCCTATCTGGCAGTAATGCAGGAATT  
ACAAGCATTGAATTTGATAGTGCTGGATCTTACCTCTTAGCAGCTTCAAATGATTTTGCAAGCCGAATCT  
GGACTGTGGATGATTATCGATTACGGCACACACTCACGGGACACAGTGGGAAAGTGCTGTCTGCTAAGTT  
CCTGCTGGACAATGCGCGGATTGTCTCAGGAAGTCACGACCGGACTCTCAAAGTCTGGGATCTACGCAGC  
AAAGTCTGCATAAAGACAGTGTTCGAGGATCCAGTTGCAATGATATTGTCTGCACAGAGCAATGTGTAA  
TGAGTGGACATTTTGACAAGAAAATTCGTTTCTGGGACATTCGATCAGAGAGCATAGTTTCGAGAGATGGA  
GCTGTTGGGAAAGATTACTGCCCTGGACTTAAACCCAGAAAGGACTGAGCTCCTGAGCTGCTCCCGTGAT  
GACTTGCTAAAAGTTATTGATCTCCGAACAAATGCTATCAAGCAGACATTCAGTGCACCTGGGTTCAAGT  
GCGGCTCTGACTGGACCAGAGTTGTCTTCAGCCCTGATGGCAGTTACGTGGCGGCAGGCTCTGCTGAGGG  
CTCTCTGTATATCTGGAGTGTGCTCACAGGGAAAGTGGAAAAGGTTCTTTCAAAGCAGCACAGCTCATCC  
ATCAATGCGGTGGCGTGGTCGCCCTCTGGCTCGCACGTTGTGAGTGTGGACAAAGGATGCAAAGCTGTGC  
TGTGGGCACAGTACTGA

>|cl|NM\_033388.2\_cds\_NP\_203746.1\_1 [gene=ATG16L2] [db\_xref=CCDS:CCDS31634.1]  
[protein=protein Atg16l2 isoform 1] [protein\_id=NP\_203746.1] [location=36..1895] [gbkey=CDS]

ATGGCGGGGCCGGGCGTCCCCGGTGCCCCGCAGCGCGCTGGAAACGCCACATCGTGCGGCAGCTGCGGC  
TTCGGGACCGTACGCAAAAGGCGCTTTTCCTGGAGCTGGTGCCGGCCTATAACCATCTCTTAGAGAAGGC  
TGAGCTGCTGGACAAGTTCTCAAAGAAGCTGCAGCCGGAGCCAAACAGTGTCACCTCCCACCACCCACCAG  
GGCCCCTGGGAGGAGTCAGAGCTTGA CT CAGACCAAGTCCCATCACTGGTCGCACTGAGGGTGAAGTGGC  
AGGAGGAGGAGGAGGGGCTCCGGCTGGTCTGTGGTGAGATGGCCTACCAGGTGGTGGAGAAGGGCGCGGC  
CCTGGGCACGCTGGAGTCGGAGCTGCAGCAGAGGCAAAGCAGGCTGGCAGCCCTGGAGGCCCGCGTGGCG  
CAGCTGCGAGAGGCGCGGGCGCAGCAGGCCAGCAGGTGGAGGAGTGGCGGGCGCAGAATGCGGTGCAGC  
GGGCAGCCTACGAGGCGCTGCGCGCGCACGTGGGGCTCCGGGAGGCGGCACTGCGCAGGCTCCAGGAAGA  
GGCGCGCGACCTGCTGGAGAGGCTCGTGCAGCGCAAGGCGCGCGCCGCGGCCGAGCGCAACCTGCGCAAC  
GAGCGCCGGGAGCGGGCCAAGCAGGCGCGGGTGTCCAGGAGCTGAAGAAGGCTGCCAAGCGGACCGTGA  
GCATCAGCGAGGGCCCGGACACCCTAGGCGATGGGATGAGGGAGAGAAGGGAGACTCTGGCTCTGGCCCC  
TGAGCCAGAGCCCCTGGAGAAGGAAGCTTGTGAGAAGTGGAAGAGGCCCTTCAGGTCTGCCTCAGCCACC  
TCCCTGACGCTGTCCCACTGTGTGGATGTGGTGAAGGGGCTTCTGGATTTTAAGAAGAGGAGAGGTCACT  
CAATTGGGGGAGCCCCTGAGCAGCGATACCAGATCATCCCTGTGTGTGTGGCTGCCCGACTTCCTACCCG  
GGCTCAGGATGTGCTGGATGCCACCTCTCTGAGGTCAATGCTGTTCGTTTTGGCCCCAACAGCAGCCTC  
CTGGCCACTGGAGGGGCTGACCGCCTGATCCACCTCTGGAATGTTGTGGGAAGTCGCCTGGAGGCCAACC  
AGACCCTGGAGGGAGCTGGTGGCAGCATCACCAGTGTGGACTTTGACCCCTCGGGCTACCAGGTTTTAGC  
AGCAACTTACAACCAGGCTGCCAGCTCTGGAAGGTGGGGGAGGCACAGTCCAAGGAGACACTGTCTGGA  
CACAAGGATAAGGTGACAGCTGCCAAATTCAAGCTAACGAGGCACCAGGCAGTGACTGGGAGCCGCGACC  
GGACAGTGAAGGAGTGGGACCTCGGCCGTGCCTATTGCTCCAGGACCATCAATGTCCTTTCCTACTGTAA  
TGACGTGGTGTGTGGGGACCATATCATCATTAGTGGCCACAATGACCAGAAGATCCGGTTCTGGGACAGC

AGGGGGCCCCACTGCACCCAGGTCATCCCTGTGCAGGGCCGGGTACCTCCCTGAGCCTCAGCCACGACC  
AACTGCACCTGCTCAGCTGTTCCCGAGACAACACACTCAAGGTCATCGACCTGCGTGTGAGCAACATCCG  
CCAGGTGTTCAAGGGCCGATGGCTTCAAGTGTGGTTCTGACTGGACCAAAGCTGTGTTCAAGCCGGACAGA  
AGCTATGCACTGGCAGGCTCCTGTGATGGGGCCCTTTACATCTGGGATGTGGACACCGGGAACTGGAGA  
GCAGACTACAGGGACCCCATTCGCTGCCGTCAACGCCGTGGCCTGGTGCTACTCCGGGAGCCACATGGT  
GAGCGTGGACCAGGGCAGGAAGGTTGTGCTCTGGCAGTAG

>|cl|NM\_015104.3\_cds\_NP\_055919.2\_1 [gene=ATG2A] [db\_xref=CCDS:CCDS31602.1]  
[protein=autophagy-related protein 2 homolog A isoform 1] [protein\_id=NP\_055919.2]  
[location=75..5891] [gbkey=CDS]

ATGTCACGATGGCTGTGGCCATGGTCAAACCTGTGTGAAAGAGCGGGTCTGCCGCTACTTGCTGCACCACT  
ACTTAGGTCACCTCTTCCAAGAGCACCTCAGCCTGGACCAGCTCAGCCTCGATCTGTACAAGGGCAGCGT  
TGCCCTGCGAGACATCCACCTGGAAATCTGGTCTGTGAACGAGGTGCTGGAGTCAATGGAGTCACCGCTG  
GAGCTGGTGAAGGCTTCGTGGGCTCCATCGAGGTGGCCGTGCCCTGGGCTGCTCTGCTACCGACCACT  
GCACAGTGC GCGTGTCCGGCCTCCAGCTCACCTTGAGCCCCGCCGGGGTCCAGCGCCAGGGGGCTGCCGA  
CTCACAGAGCTGGGCTCATGCATGACCACAAGCCTGCAGCTGGCCCAGGAGTGTCTGCGGGATGGGCTA  
CCGGAGCCCTCTGAGCCACCACAGCCCCTGGAGGGGCTGGAGATGTTTGCCAGACCATTGAGACTGTGC  
TTCGGAGGATCAAAGTGACCTTCCTGGACACTGTCGTGAGGGTGGAGCACTCTCCGGGTGATGGGGAACG  
TGGTGTGGCCGTCGAGGTCCGTGTGCAGAGACTGGAGTACTGTGATGAGGCAGTGCGGGACCCAAGCCAG  
GCGCCGCCGGTGGACGTGCATCAGCCGCCTGCCTTCCTGCACAAGCTGCTGCAGCTGGCAGGGGTCCGCC  
TGCACTACGAGGAGCTCCCGGCACAGGAAGAGCCTCCAGAGCCCCCTTGAGATCGGCAGCTGCTCAGG  
GTACATGGAGCTGATGGTGAAGTTGAAGCAAAATGAGGCCTTCCCTGGCCCCAAGTTGGAGGTGGCGGGA  
CAGCTGGGCTCCCTGCACCTGCTCCTGACCCCGAGGCAGCTCCAGCAACTTCAGGAACTGCTCAGCGCCG

TGAGCCTTACAGACCACGAGGGCCTGGCTGACAAGCTGAACAAGAGCCGCCGCTAGGTGCCGAAGACCT  
GTGGCTGATTGAGCAGGACCTGAACCAGCAGCTGCAGGCAGGGGCAGTGGCTGAGCCCCTCAGCCCAGAC  
CCCCTTACCAACCCCCTTCTCAACCTGGATAAACTGACCTCTTCTTCTCCATGGCTGGCCTCACAAGCA  
GTGTGGCCTCAGCCCTCTCTGAGCTCTCCCTCTCCGATGTAGACCTGGCCTCCTCTGTGCGCAGCGACAT  
GGCCTCCCGCCGGCTCTCTGCCCAGGCCACCCAGCTGGCAAGATGGCCCCCAACCCCCTCTGGACACC  
ATGCGCCCTGACTCGCTGCTGAAGATGACCTTGGGGGGTGTGACCCTGACCTTGCTTCAGACGTCTGCCC  
CATCTTCCGGACCACCTGACCTCGCCACGCACTTTTACCGAGTTTGATGCCACCAAGGATGGGCCCTT  
CGGTTCCCGAGACTTCCATCACCTTCGACCACGCTTCAGAGGGCCTGTCCCTGTAGCCATGTTCCGGCTA  
ACGGGCACAGCCGTGCAGCTGTCCTGGGAGCTGCGGACGGGCAGTCGGGGCCGGCGGACAACCAGCATGG  
AAGTGCACTTCGGGCAGCTGGAGGTGCTGGAGTGTCTGTGGCCCCGGGGCACCTCTGAGCCTGAGTACAC  
GGAGATCCTGACCTTTCCTGGTACGCTGGGCTCCCAGGCCTCAGCTCGGCCCTGCGCCCATCTGCGCCAC  
ACACAGATCCTGCGCCGTGTGCCTAAGAGCCGACCCCGGCGCTCAGTTGCCTGCCATTGCCACTCAGAAC  
TGGCCCTGGACCTGGCCAACTTCCAGGCGGACGTGGAGCTGGGGGCCCTGGACCGGCTGGCCGCCCTACT  
GCGCCTGGCCACCGTACCTGCTGAGCCTCCAGCCGGCCTGCTGACAGAGCCCCTGCCGGCGATGGAGCAG  
CAGACGGTATTTGCGCTCTCTGCACCCCGGGCCACGCTGCGGCTGCGCTTCCCCATTGCCGACCTGCGGC  
CTGAGCCGGACCCCTGGGCGGGCCAGGCCGTGCGGGCTGAGCAGCTTCGGCTGGAGCTGAGTGAGCCCCA  
GTTCCGGTCAGAGCTTAGCAGTGGGCCTGGTCCCCCAGTCCCCACCCACCTGGAACCTCACCTGCTCCGAC  
CTACATGGTATCTATGAAGATGGAGGGAAGCCACCTGTCCCTTGCTGCGTGTCTCAAAGCCCTGGACC  
CCAAGAGCACTGGGCGCAAGTACTTCTGCCCCAGGTAGTGGTGAAGTGTGAACCCCCAGTCCAGCAGCAC  
ACAGTGGGAGGTGGCCCCGGAGAAGGGAGAGGAACTGGAGCTGTCAGTGGAGAGTCCCTGTGAGCTGCGG  
GAACCTGAGCCCTCGCCCTTCTCCTCTAAGAGGACCATGTATGAGACAGAGGAGATGGTGATCCCTGGAG  
ACCCTGAGGAGATGAGGACGTTCCAGAGCCGGACCCTGGCACTGTCCCGCTGCAGCCTGGAAGTGATCCT  
GCCCAGTGTCCACATCTTTCTGCCCAGCAAGGAGGTCTACGAGAGCATCTACAACAGGATCAACAACGAC  
CTGCTCATGTGGGAGCCTGCAGATCTGCTTCCCACCCCCGACCCCGCCGCCAGCCCTCGGGCTTCCCCG  
GCCCCTCAGGCTTCTGGCACGACAGCTTTAAGATGTGCAAGTCAGCCTTCAAGCTGGCCAACTGCTTTGA

TCTCACCCCAGACTCGGACTCGGATGACGAGGATGCCACTTCTTCTCAGTGGGGGCATCAGGTGGCCCA  
CAGGCCGCTGCCCCTGAGGCCCAAGTCTTCACTTGCAGAGCACCTTCTCTACACTGGTGACAGTGCTGA  
AGGGGCGGATCACAGCCCTCTGTGAGACCAAGGATGAGGGTGGGAAGCGGCTGGAGGCTGTGCACGGGGA  
GCTGGTGCTGGACATGGAGCACGGTACCCTCTTCAGCGTCTCCAGTACTGTGGCCAGCCAGGACTTGGC  
TACTTCTGTCTGGAAGCTGAAAAGGCAACACTCTACCACCGAGCGGCCGTGGATGACTACCCGCTGCCCA  
GTCACCTGGACCTTCCCAGTTTCGCTCCCCCGGCTCAGCTGGCCCCAACCATCTACCCATCGGAGGAAGG  
GGTGACCGAGCGGGGAGCCTCGGGCCGCAAGGGCCAGGGCCGGGGACCCACATGTTGTCCACTGCTGTG  
CGCATCCACCTGGACCCCCACAAGAATGTGAAGGAGTTCCTGGTGACACTGCGGTTGCACAAAGCCACCT  
TGCGCCACTACATGGCCCTGCCCAGCAGAGCTGGCATTCCCAGTTGTTGGAGTTCCTAGACGTGCTGGA  
TGACCCTGTGCTGGGCTACCTGCCCCGACGGTCATCACCATCCTGCACACACACCTGTTCTCCTGCTCT  
GTGGACTATAGGCCACTCTACCTCCCAGTGCGTGTCTCATCACCGCGGAGACCTTCACTCTCTCCAGCA  
ACATCATCATGGACACCTCCACCTTCTGCTCAGGTTTCATCCTCGATGACTCCGCCTTGTACCTGTCCGA  
CAAGTGTGAGGTGGAGACCCTGGACCTGCGGCGAGATTATGTCTGTGTTTTGGATGTTGACCTCTTGAA  
CTTGTGATTAAACCTGGAAAGGGAGCACCGAGGGCAAAGTGAAGCCAGCCACTATTCGAGCTGCGCTGCT  
CCAACAATGTGGTACACGTGCACAGCTGTGCCGACTCCTGTGCCCTGCTGGTCAACCTGCTCCAGTACGT  
AATGAGCACAGGCGATCTGCACCCCCACCCCGGCCCCCAGCCCCACGGAGATCGCCGGCCAGAAGCTC  
TCGGAGAGTCTGCCTCTCTGCCCTCGTGCCCCCAGTGGAGACGGCCCTCATCAACCAGCGTGACCTGG  
CCGACGCCCTCCTGGACACCGAGCGCAGCCTACGGGAGCTGGCCCAGCCTTCAGGTGGCCACCTCCCTCA  
GGCGTCGCCCATCTCCGTCTACCTATTCCAGGTGAACGGAGTGGGGCCCCACCCCTTACCCACCTGTC  
GGGGGCCCTGCTGGCAGCTTAGGGTCATGCTCAGAGGAGAAGGAAGATGAAAGGGAAGAGGAGGGCGATG  
GAGACACCCTGGACAGTGATGAGTTCTGCATCCTTGATGCTCCCGGCTGGGCATCCCGCCCCGAGATGG  
GGAGCCTGTGGTGACACAGCTGCATCCCGGCCCATCGTTGTGAGGGACGGTTACTTCTCACGGCCGATC  
GGCAGCACGGACTTGCTGCGGGCACCTGCCCATTTCCAGTGCCCAGCACTCGGGTGGTGCTACGTGAGG  
TCTCCCTCGTCTGGCACCTCTATGGGGGCCGAGACTTTGGCCCCACCCCGGCCACAGGGCAAGAAGTGG  
CCTCTCAGGTCCCAGGAGCTCCCCTTCCCGCTGCTCTGGCCCCAACCGGCCCCAGAACTCATGGCGCACG

CAGGGGGGCAGCGGGCGGCAGCACCATGTCTCATGGAGATCCAGCTGAGCAAGGTAAGCTTCCAGCACG  
AGGTGTACCCAGCGGAGCCAGCCACAGGCCCTGCGGCCCCCAGCCAGGAGCTGGAGGAGCGACCGCTGTC  
CCGTCAGGTGTTTCATCGTGCAGGAGCTGGAGGTCCGAGACCGGCTCGCCTCCTCCCAGATCAACAAGTTC  
CTGTACCTACACACGAGTGAGCGGATGCCGCGACGTGCCCACTCTAACATGCTCACCATCAAAGCGCTGC  
ATGTGGCCCCCACTACCAACCTGGGTGGGCCTGAGTGCTGTCTCCGCGTCTCGCTGATGCCCTGCGGT  
CAATGTGGACCAGGATGCCCTCTTCTTCTCAAGGACTTCTTCACTAGTCTGGTGGCCGGCATCAACCCC  
GTGGTCCCAGGGGAGACCTCCGCTGAGGCTCGCCCCGAGACTCGAGCCCAGCCCAGCAGCCCCCTGGAAG  
GGCAGGCCGAAGGCGTAGAGACCACTGGTTGCGAGGAGGCCCCAGGAGGTGGACACAGCCCCCTCCCTCC  
TGACCAGCAGCCCATCTACTTCAGAGAGTTCGCTTCACGTCTGAGGTCCCCATCTGGCTGGATTACCAT  
GGCAAGCACGTACGATGGACCAGGTGGGCACTTTTGCTGGCCTCCTCATCGGCCTGGCCCAACTCAACT  
GCTCCGAGCTGAAGCTAAAGCGGCTCTGTTGCAGGCACGGGCTCCTGGGTGTGGACAAGGTGCTGGGCTA  
TGCCCTCAACGAGTGGCTGCAGGACATCCGCAAGAACCAGCTGCCCCGGCCTGCTGGGAGGCGTGGGCCCC  
ATGCACTCGGTTGTCCAGCTCTTCCAAGGGTTCCGGGACCTGCTGTGGCTGCCATTGAGCAGTACAGGA  
AGGATGGCCGCTCATGCGGGGGCTGCAGCGAGGGGCTGCCTCCTTTGGCTCATCCACAGCCTCTGCCGC  
CCTGGAACTCAGCAACCGTTGGTACAGGCTATCCAGGCCACAGCTGAGACCGTGTATGACATCCTGTCC  
CCGGCAGCCCCCGTCTCCCGCTCCCTGCAGGATAAGCGCTCTGCGCGGAGGCTGCGCAGGGGGCCAGCAGC  
CTGCCGACCTGCGGGAGGGTGTGGCCAAGGCCTACGACACAGTGCGAGAGGGCATCTTGGATACAGCTCA  
GACCATCTGTGACGTGGCATCGCGGGGCCATGAGCAGAAGGGGCTGACGGGCGCCGTGGGGGGCGTGATC  
CGCCAGCTGCCCCCGACTGTGGTGAAGCCGCTCATCCTGGCCACGGAGGCCACGTCCAGCCTGCTCGGGG  
GCATGCGCAACCAGATTGTCCCCGACGCCACAAGGACCACGCCCTCAAGTGGCGCTCGGACAGTGCCCA  
AGACTGA

>|cl|NM\_018036.7\_cds\_NP\_060506.6\_1 [gene=ATG2B] [db\_xref=CCDS:CCDS9944.2]  
[protein=autophagy-related protein 2 homolog B] [protein\_id=NP\_060506.6] [location=366..6602]  
[gbkey=CDS]

ATGCCTTGGCCGTTTTCGGAGTCCATCAAGAAGAGGGCCTGCCGGTACCTCCTGCAGAGGTACCTGGGCC  
ACTTTCTGCAGGAGAAGCTGAGCCTGGAGCAGCTCAGCCTGGACCTGTACCAAGGCACCGGGTCCCTCGC  
CCAGGTCCCCTTGGACAAATGGTGTCTCAATGAGATCTTGGAGTCAGCAGATGCACCTTAGAAGTCACT  
GAAGGATTCATTCAGTCAATTTCCCTGTCAGTTCATGGGGCTCTTTACTGCAGGATAATTGTGCACTGG  
AAGTGAGAGGATTAGAAATGGTCTTCCGGCCTAGACCTCGCCCAGCAACTGGTTCTGAGCCTATGTATTG  
GTCAAGTTTTATGACCAGCAGTATGCAATTGGCAAAGAATGTCTTAGCCAGAACTAACAGATGAACAA  
GGAGAAGGATCCCAGCCTTTGAAGGACTTGAAAAGTTTGCTGAAACCATTGAAACAGTACTAAGAAGAG  
TAAAAGTCACTTTTATAGATACTGTTTTGAGAATTGAACATGTGCCAGAAAATTCCAAAAGTGGAACTGC  
ACTTGAAATTCGAATAGAAAGAACTGTGTACTGTGATGAACTGCTGACGAATCCTCAGGAATTAATGTG  
CATCAACCCACTGCTTTTGCTCACAAGTTACTTCAGCTCTCTGGAGTGTCTCTTCTGGGATGAGTTTT  
CTGCATCAGCCAAATCTTCCCAGTGTGTTCAACTGCACCAGTGGAACTGAGCCAAAGCTCTCACCTAG  
CTGGAACCCCAAATTATTTATGAGCCACACCCACAGCTAACTAGAAATTTACCAGAGATAGCACCTTCT  
GACCCAGTGCAGATTGGACGGTTAATTGGTAGGTTGGAGTTGAGTCTCACGTTGAAACAGAATGAAGTGC  
TTCCTGGAGCTAAGTTGGATGTTGATGGACAGATAGACTCTATTCATCTACTCCTGTACCAAGACAGGT  
GCACTTGCTTTTGGATATGTTGGCAGCTATTGCTGGACCAGAAAATTCTAGCAAAATAGGGTTAGCTAAT  
AAAGATAGGAAAAATCGACCCATGCAGCAGGAAGACGAGTATCGAATTCAGATGGAATTAACCGGTATT  
ATTTGAGAAAAGATTCCCTCTCTGTGGGTGTATCTTCAGAGCAAAGCTTTTATGAGACAGAAACAGCTCG  
TACACCTTCTAGCCGTGAAGAAGAAGTATTCTTCTCCATGGCTGATATGGACATGTCTCATAGTCTCTCT  
TCTCTTCCACCCCTTGGGGACCCCCAAACATGGACCTTGAGTTATCATTAACTAGTACATATACAAATA  
CCCCAGCAGGATCTCCATTAAGTGCTACTGTGCTTCAGCCCACTTGGGGAGAGTTCCTTGATCATCATAA  
AGAACAGCCAGTAAGAGGGTCAACATTTCCATCCAACCTAGTTCACCCAACACCTTTACAGAAGACATCT  
CTCCCATCTAGATCTGTTTCAGTGGATGAATCAAGGCCTGAACTATTTTTAGACTAGCTGTGGGAACTT

TTTCAATCTCTGTGCTTCACATTGATCCTTTATCTCCACCTGAAACGTCACAGAACCTTAATCCATTGAC  
ACCTATGGCAGTAGCTTTCTTTACTTGTATAGAAAAGATTGATCCAGCAAGATTTTCAACAGAAGATTTT  
AAGTCTTTCCGAGCAGTGTTGCAGAAGCTTGCTCACACGATCACCTTAGATTTATAGGTACTGGCATT  
AAGTATCCTATGAACAAAGACAAAGATCAGCTTCCCGATATTTTAGTACTGATATGTCCATTGGGCAAAT  
GGAATTTTTGGAGTGCCTATTTCCAAGTATTTTCTGTTCTCCTCACTATACAGAGCTTTTAACG  
TTCCATTCCAAAGAAGAACTGGTTCCCATTTCCCTGTGTGTCTTCAGCTTCATTATAAGCATTCTGAGA  
ATAGAGGGCCCCAGGGTAATCAAGCAAGACTTAGTTCAGTTCCTCACAAGGCAGAATTGCAAATTA  
AAATCCAGTGTGTTGTGAGCTGGATATCAGTATTGTGGACAGGTTAAATTCCTTGCTTCAACCACAGAAA  
CTTGCCACAGTAGAGATGATGGCATCCACATGTATACTTCATATAATAAACATATTAGTCTGCACAAGG  
CTTCACTGAAGTGTTTCTAGATGATTCACATAGTCTGCAAATTGTCGGATATCAGTACAAGTTGCCAC  
ACCAGCATTAACCTTTCTGTTGCTTCCCAATACCTGATCTTCGATCTGATCAAGAAAGAGGACCATGG  
TTAAGAAGTCACTTCAGAAGGAGATCCTTTATTTAGCCTTCACAGATCTAGAATTTAAGACTGAATTTA  
TAGGAGGATCAACCCCAGAACAAATTAATTTGGAAGTTACCTTTAGAGAACTAATTGGATCGTTCCAGGA  
AGAGAAAGGAGATCCATCTATTAAGTTTTTCCATGTGTCTAGTGGAGTAGATGGAGATACAACATCGTCA  
GATGACTTTGACTGGCCACGAATTGTACTGAAAATAAATCCACCAGCCATGCATTCCATTTTGGAGAGAA  
TTGCAGCTGAAGAAGAAGAGGAGAATGATGGTCACTACCAGGAGGAAGAGGAAGGAGGTGCTCATTCTT  
GAAAGATGTTTGTGATCTAAGAAGACCAGCCCCATCTCCTTTTTCTTCTCGTAGAGTAATGTTTGAAAT  
GAACAGATGGTGATGCCAGGAGACCCTGTAGAAATGACAGAATTTAGGATAAAGCAATCAGCAATTCTC  
ACTATGTGCTGGAAGTTACGTTACCAAATATTTATGTAACACTACCTAATAAGAGCTTTTATGAGAAGCT  
TTATAATAGGATCTTTAATGACTTGCTACTGTGGGAACCAACAGCTCCTTCACCAGTGGAGACATTCGAG  
AATATTTCTATGGCATTGGGCTTTAGTAGCCAGTCAGCTCATTAACTTTCAACAAAGATAGTTT  
GTGCATTTAAATCTGCAGTTCATATGATGAGGAAAGTGGATCTGAGGAGGAGACTTTGCAGTATTTTTC  
CACTGTTGATCCCAACTATCGTTCTCGCAGGAAAAAAAAAATTAGACTCTCAGAACAAGAACTCTCAGAGT  
TTTCTCTCAGTTCTTCTGAATATTAATCATGGATTAATAGCAGTGTTACAGATGTGAAGCAAGATAATG  
GAGATCTGTTGGAAAACAAGCATGGTGAATTCTGGTTAGAGTTCAATAGTGGTTCATTATTTTGTGTGAC

AAAATATGAAGGTTTTGATGACAAGCACTACATTTGCCTTCATTCTAGCAGTTTCAGTCTGTACCATAAA  
GGCATAGTGAATGGAGTGATTCTCCCGACAGAAACACGACTTCCCAGCTCAACCCGCCACACTGGTTGG  
AACCTACTATTTATTCCTCTGAAGAAGATGGCCTCAGTAAACTTCTTCAGATGGAGTTGGAGGAGACAG  
TTTGAATATGCTGTCTGTTGCCGTTAAATATTGTCTGATAAATCAGAGTCCAATACAAAGGAATTTCTC  
ATTGCCGTAGGACTGAAAGGAGCCACTCTCCAGCATAGAATGCTTCCTTCTGGGCTTAGCTGGCATGAGC  
AGATTTTATACTTCTTGAATATTGCTGATGAACCTGTTTTGGGATATAATCCTCCAACCTTCATTTACAAC  
TTTTCATGTTTCATCTTTGGAGCTGTGCACTTGATTATAGACCCCTTTATTTGCCAATCCGATCTCTTCTT  
ACCGTGGAACATTCAGTGTTTCCAGTAGCGTTGCATTGGATAAATCTTCCTCTACTCTCAGAATAATCT  
TGGATGAAGCTGCTTTACATCTATCTGACAAATGCAATACTGTCACTATAAATCTGAGTAGAGATTATGT  
TCGTGTGATGGATATGGGGCTTTTGGAGTTAACCATAACTGCAGTGAAGTCTGATTCTGATGGAGAGCAA  
ACTGAGCCCCGCTTTGAGTTACACTGTTCCAGCGATGTTGTCCATATCAGAACGTGCTCAGACTCTTGTG  
CTGCGTTAATGAATCTCATTCACTGATGCAAGCTATGGTGACTTGCAGACACCTAACAAGGCAGATAT  
GAAGCCTGGAGCCTTTCAAAGAAGGTCTAAGGTAGATTCCAGTGGTCGATCATCCTCACGTGGTCCAGTA  
CTTCCTGAAGCAGATCAACAAATGTTACGAGATCTGATGAGTGATGCTATGGAGGAGATCGACATGCAAC  
AAGGCACCTCGTCAGTAAACCACAGGCTAATGGTGTTTTGGATGAAAAATCTCAAATTCAGGAGCCATG  
TTGTTCAAGCCTCTTCTGTTTCTGACGAGAGTGGAATGTATCCCAGGAGTCCGGCCCCACCTATGCC  
TCATTCTCTCACCATTTTCATCAGTGATGCAATGACAGGTGTGCCCACTGAGAATGATGACTTTTGCATTC  
TTTTTGACCAAAAAGCAGCCATGCAGGAGAAGGAAGAAGAACCAGTTATAAAAATCATGGTTGATGATGC  
AATTGTGATAAGAGACAATTATTTCACTGCTGCCGTTAATAAGACCGATACGAGCAAAGCCCCCTTACAC  
TTTCCATTCTGTGATTGCTATGTGGTGAAGGAGGTCTCTCTTGTCTGGCATCTTTATGGAGGAAAGG  
ATTTTGGAATAGTCCCTCCCACTTCTCCGGCTAAAAGTTATATTAGTCCCCACAGTTCGCCTTCTCACAC  
ACCCACGAGACATGGACGTAATACAGTATGTGGGGGAAAAGGAAGGAACCATGACTTTTTAATGGAAATA  
CAGCTAAGCAAGGTGAAGTTTCAGCATGAAGTCTACCCGCCATGCAACCTGATTGTGATTCCAGCCTCT  
CAGAACACCCAGTCTCCCGGCAGGTGTTCAATTGTTTCAGGATCTTGAGATTCGAGATCGTTTGGCAACATC  
ACAAATGAATAAATTTTTATACCTGTATTGCAGTAAAGAAATGCCTCGAAAAGCTCACTCCAACATGTTG

ACAGTGAAAGCCTTACACGTGTGTCCAGAATCTGGCAGGTCCCCACAGGAGTGCTGCTTGAGAGTGTCGC  
TGATGCCGCTCCGCCTCAATATTGACCAGGATGCTTTGTTCTTCCTGAAGGATTTCTTCACAAGTCTTTC  
TGCAGAAGTAGAGCTTCAAATGACTCCAGATCCAGAAGTTAAAAAGTCTCCTGGAGCTGATGTCACCTGC  
AGTTTGCCAAGGCATTTGAGTACCTCAAAGGAGCCAAATCTGGTTATTTCTTCTCTGGGCCAAAACAGC  
CTTCCCAAATGATAGTGCCAATTCAGTGGAAGTGGTTAATGGCATGGAAGAGAAGAACTTCTCTGCTGA  
AGAAGCATCTTTTAGGGATCAGCCTGTGTTTTTAGAGAATTTAGATTCACGTCAGAAGTCCCATTCTGA  
CTTGATTATCATGGCAAACATGTATCAATGGATCAGGGTACGCTAGCTGGGATTTTGATTGGTCTGGCTC  
AGTTAAACTGCTCTGAACTAAAGCTCAAGAGGCTTTCCTATCGACATGGTTTACTAGGCGTTGACAAATT  
ATTCTCATATGCAATCACTGAGTGGCTTAATGACATTAAGAAGAACCAGCTACCAGGAATCCTGGGAGGT  
GTTGGACCTATGCATTCAGTACAATTAGTACAAGGCCTAAAGGACTTGGTCTGGCTCCCAATAGAGC  
AGTACCGGAAGGATGGCCGATTGTCAGAGGGTTTCAGAGAGGCGCTGCTTCCTTGGTACCTCGACAGC  
GATGGCTGCTCTAGAACTCACAACAGAATGGTTCAAACCATACAGGCAGCTGCAGAGACTGCTTATGAT  
ATGGTGTCTCCTGGTACCCTTTCTATCGAGCCCAAGAAGACCAAAAGGTTTCCTCATCACCGGTTAGCCC  
ACCAGCCAGTAGACCTGAGGGAAGGTGTGGCCAAGGCCTACAGTGTTGTGAAAGAGGGAATCACAGACAC  
GGCTCAGACCATTTATGAACTGCGGCTCGAGAACACGAGAGCAGAGGGGTGACTGGTGCCGTGGGCGAG  
GTTCTGCGCCAGATTCTCCGGCAGTGGTGAAACCTCTGATTGTTGCCACAGAAGCAACGTCAAACGTGC  
TGGGTGGCATGAGAAACCAAATTAGGCCAGATGTCCGGCAAGACGAGTCACAGAAATGGCGCCACGGGGA  
TGA

>|cl|NM\_022488.5\_cds\_NP\_071933.2\_1 [gene=ATG3] [db\_xref=CCDS:CCDS2966.1] [protein=ubiquitin-  
like-conjugating enzyme ATG3 isoform 1] [protein\_id=NP\_071933.2] [location=435..1379] [gbkey=CDS]

ATGCAGAATGTGATTAATACTGTGAAGGGAAAGGCACTGGAAGTGGCTGAGTACCTGACCCCGTCTCA  
AGGAATCAAAGTTTAAGGAAACAGGTGTAATTACCCAGAAGAGTTTGTGGCAGCTGGAGATCACCTAGT

CCACCACTGTCCAACATGGCAATGGGCTACAGGGGAAGAATTGAAAGTGAAGGCATACCTACCAACAGGC  
AAACAATTTTTGGTAACCAAAAATGTGCCGTGCTATAAGCGGTGCAAACAGATGGAATATTCAGATGAAT  
TGGAAGCTATCATTGAAGAAGATGATGGTGATGGCGGATGGGTAGATACATATCACAACACAGGTATTAC  
AGGAATAACGGAAGCCGTTAAAGAGATCACACTGGAAAATAAGGACAATATAAGGCTTCAAGATTGCTCA  
GCACTATGTGAAGAGGAAGAAGATGAAGATGAAGGAGAAGCTGCAGATATGGAAGAATATGAAGAGAGTG  
GATTGTTGGAAACAGATGAGGCTACCCTAGATACAAGGAAAATAGTAGAAGCTTGTAAGCCAAAACCTGA  
TGCTGGCGGTGAAGATGCTATTTTGCAAACCAGAACTTATGACCTTTACATCACTTATGATAAATATTAC  
CAGACTCCACGATTATGGTTGTTTGGCTATGATGAGCAACGGCAGCCTTTAACAGTTGAGCACATGTATG  
AAGACATCAGTCAGGATCATGTGAAGAAAACAGTGACCATTGAAAATCACCCCTCATCTGCCACCACCTCC  
CATGTGTTCAAGTTCACCCATGCAGGCATGCTGAGGTGATGAAGAAAATCATTGAGACTGTTGCAGAAGGA  
GGGGGAGAACTTGGAGTTCATATGTATCTTCTTATTTCTTGAAATTTGTACAAGCTGTCATTCCAACAA  
TAGAATATGACTACACAAGACACTTCACAATGTAA

>|cl|NM\_052936.5\_cds\_NP\_443168.2\_1 [gene=ATG4A] [db\_xref=CCDS:CCDS14538.1] [protein=cysteine  
protease ATG4A isoform a] [protein\_id=NP\_443168.2] [location=50..1246] [gbkey=CDS]

ATGGAGTCAGTTTTATCCAAGTATGAAGATCAGATTACTATTTTCACTGACTACCTAGAAGAATATCCAG  
ATACAGATGAGCTGGTATGGATCTTAGGGAAGCAGCATCTCCTTAAACAGAAAAATCTAAGCTGTTGTC  
TGATATAAGTGCTCGTCTATGGTTTACATACAGAAGGAAATTTTACCAATTGGTGGAACGGGCCCTTCA  
TCAGATGCTGGTTGGGGATGTATGCTACGCTGTGGACAGATGATGCTGGCTCAAGCCCTTATCTGTAGAC  
ACTTGGGAAGGGACTGGAGCTGGGAGAAACAAAAAGAACAACCCAAAGAATACCAACGCATCCTACAGTG  
CTTCTTAGATAGAAAAGATTGTTGCTACTCTATCCATCAAATGGCACAAATGGGTGTAGGAGAAGGGAAA  
TCAATTGGAGAATGGTTTGGACCAAATACAGTTGCACAGGTGTTAAAAAACTTGCTTTATTTGACGAAT  
GGAATTCCTTGGCTGTTTATGTTTCAATGGATAACACAGTGGTCATTGAAGATATCAAAAAAATGTGCCG

TGTCCTTCCCTTGAGTGCTGACACAGCTGGTGACAGGCCTCCCGATTCTTTAACTGCTTCAAACCAGAGT  
AAGGGCACCTCTGCCTACTGCTCAGCCTGGAAACCCCTGCTGCTCATTGTGCCCTTCGCCTGGGCATAA  
ACCAAATCAATCCTGTCTATGTTGATGCATTCAAAGAGTGTTTTAAGATGCCACAGTCTTTAGGGGCATT  
AGGAGGAAAACCAAATAACGCGTATTATTTATAGGATTCTTAGGTGACGAGCTCATCTTCTTGACCCT  
CATACAACCCAGACCTTTGTTGACACTGAAGAGAATGGAACGGTTAATGACCAGACTTTCATTGCCTGC  
AGTCCCCACAGCGAATGAACATCCTAAACCTGGATCCTTCAGTTGCATTGGGATTTTTCTGCAAAGAAGA  
AAAAGACTTTGATAACTGGTGTAGCCTTGTTGAGAAGGAAATTCTAAAGGAGAATTTAAGGATGTTTGAA  
TTAGTTCAGAAACATCCATCACACTGGCCTCCCTTTGTACCTCCAGCCAAGCCAGAAGTGACAACCACTG  
GGGCAGAATTCATTGACTCTACTGAGCAACTGGAGGAGTTTGATCTGGAGGAAGATTTTGAGATTCTGAG  
TGTGTAG

>|cl|NM\_013325.5\_cds\_NP\_037457.3\_1 [gene=ATG4B] [db\_xref=CCDS:CCDS46564.1] [protein=cysteine  
protease ATG4B isoform a] [protein\_id=NP\_037457.3] [location=23..1204] [gbkey=CDS]

ATGGACGCAGCTACTCTGACCTACGACACTCTCCGGTTTGCTGAGTTGAAGATTTTCTGAGACCTCAG  
AGCCCGTTTGGATACTGGGTAGAAAATACAGCATTTTCACAGAAAAGGACGAGATCTTGTCTGATGTGGC  
ATCTAGACTTTGGTTTACATACAGGAAAACTTTCCAGCCATTGGGGGGACAGGCCCCACCTCGGACACA  
GGCTGGGGCTGCATGCTGCGGTGTGGACAGATGATCTTTGCCAAGCCCTGGTGTGCCGGCACCTAGGCC  
GAGATTGGAGGTGGACACAAAGGAAGAGGCAGCCAGACAGCTACTTCAGCGTCCTCAACGCATTTCATCGA  
CAGGAAGGACAGTTACTACTCCATTACCAGATAGCGCAAATGGGAGTTGGCGAAGGCAAGTCCATAGGC  
CAGTGGTACGGGCCCAACACTGTCGCCCAGGTCTGAAGAAGCTTGCTGTCTTCGATACGTGGAGCTCCT  
TGGCGGTCCACATTGCAATGGACAACACTGTTGTGATGGAGGAAATCAGAAGGTTGTGCAGGACCAGCGT  
TCCCTGTGCAGGCGCCACTGCGTTTCCTGCAGATTCCGACCGGCACTGCAACGGATTCCCTGCCGGAGCT  
GAGGTCACCAACAGGCCGTGCCATGGAGACCCCTGGTACTTCTCATTCCCCTGCGCCTGGGGCTCACGG

ACATCAACGAGGCCTACGTGGAGACGCTGAAGCACTGCTTCATGATGCCCCAGTCCCTGGGCGTCATCGG  
AGGGAAGCCCAACAGCGCCCACTACTTCATCGGCTACGTTGGTGAGGAGCTCATCTACCTGGACCCCCAC  
ACCACGCAGCCAGCCGTGGAGCCCACTGATGGCTGCTTCATCCCGGACGAGAGCTTCCACTGCCAGCACC  
CGCCGTGCCGCATGAGCATCGCGGAGCTTGACCCGTCCATCGCTGTGGGGTTTTTCTGTAAGACTGAAGA  
TGACTTCAATGATTGGTGCCAGCAAGTCAAAAAGCTGTCTCTGCTTGGAGGTGCCCTGCCATGTTTGAG  
CTGGTGGAGCTGCAGCCTTCACATCTGGCCTGCCCCGACGTCCTGAACCTGTCCCTAGATTCTTCTGATG  
TAGAGCGACTGGAAAGATTCTTCGACTCAGAAGATGAAGACTTTGAAATCCTGTCCCTTTGA

>|cl|NM\_032852.4\_cds\_NP\_116241.2\_1 [gene=ATG4C] [db\_xref=CCDS:CCDS623.1] [protein=cysteine  
protease ATG4C] [protein\_id=NP\_116241.2] [location=211..1587] [gbkey=CDS]

ATGGAGGCTACAGGAACAGATGAAGTTGACAAGCTAAAAACCAATTTATATCTGCTTGGAAACAACATGA  
AATATAGTTGGGTGTTGAAAACAAAGACGTATTTTAGTAGAAATTCTCCTGTATTATTGCTTGGAAAATG  
TTACCATTTTAAATATGAAGATGAAGATAAAACGTTACCTGCAGAGTCGGGATGTACAATAGAGGATCAC  
GTAATTGCAGGAAATGTAGAAGAATTTCTGTAAGATTTTCTTTCTAGAATATGGCTGACCTACAGGGAAG  
AATCCCTCAAATAGAAGGCTCAGCTTTGACAACAGACTGTGGGTGGGGCTGCACATTGAGAACTGGCCA  
GATGCTCTTGGCTCAAGGACTCATACTACACTTTCTTGGTAGAGCTTGGACCTGGCCTGATGCTTTGAAT  
ATTGAAAATTCAGACTCTGAATCATGGACTTCCCACACTGTCAAAAAATTTACTGCATCATTTGAAGCAT  
CACTTTCAGGGGAAAGAGAATTCAAAACCCCAACAATTTCTCTGAAGGAAACAATTGGGAAATATTCTGA  
TGATCATGAAATGCGAAATGAAGTTTATCATAGGAAATCATCTCTTGGTTTGGTGATTCCCCCTTGGCT  
CTTTTGGCTTACATCAACTAATAGAATATGGAAAGAAGTCTGGGAAAAAGCAGGAGATTGGTATGGAC  
CAGCTGTGGTTGCTCACATTTTAAGAAAAGCAGTTGAAGAAGCAAGGCATCCTGATTTACAAGGAATAAC  
TATTTATGTTGCACAAGATTGTACAGTTTACAATTCTGATGTAATTGATAAACAGAGTGCTTCCATGACT  
TCTGATAATGCAGATGACAAAGCTGTTATTATTCTAGTTCCTGTTAGACTTGGTGGAGAAAGAACCAACA

CCGACTACTTAGAATTTGTGAAGGGTATTTTAAGCCTGGAATATTGTGTGGGTATTATTGGTGGCAAACC  
TAAACAGTCATATTACTTTGCTGGATTTCAAGATGACAGTTTGATTTACATGGATCCTCATTACTGCCAA  
TCTTTTGTAGATGTCAGCATAAAGGATTTCCCTCTTGAGACATTCCACTGCCCTTCTCCAAAAAGATGT  
CTTTTCGAAAAATGGATCCCAGCTGTACAATAGGATTTTACTGTCGAAATGTTTCAGGACTTCAAACGAGC  
TTCTGAAGAAATCACCAAGATGCTGAAATTTTCTTCTAAGGAGAAATATCCCTTATTTACTTTTGTAAT  
GGTCATTCCAGAGACTATGATTTTACATCTACTACAACCAATGAAGAAGACCTTTTTTCAGAGGATGAAA  
AGAAACAATTA AAAAGATTTAGCACGGAAGAGTTTGTCTTGCTTTAA

>|cl|NM\_032885.6\_cds\_NP\_116274.3\_1 [gene=ATG4D] [db\_xref=CCDS:CCDS12241.1] [protein=cysteine  
protease ATG4D isoform 1 precursor] [protein\_id=NP\_116274.3] [location=188..1612] [gbkey=CDS]

ATGAACTCAGTGTGCGCCGGCCGCCGCGCAGTACCGGAGCAGCAGCCCGGAGGACGCGCGCCGCCGGCCCCG  
AGGCCCGCAGGCCGCGGGGTCCCAGAGGCCAGACCCCAACGGCCTGGGGCCTTCCGGAGCCAGCGGCC  
CGCTCTTGCTCTCCCGGGGCTGGCCGAGTGAGCCGGACGAAGTGGACAAGTTCAAGGCCAAGTTCCTG  
ACAGCCTGGAACAACGTCAAGTACGGTTGGGTGGTTAAAAGCCGGACCAGCTTTAGCAAGATCTCCAGCA  
TCCACCTCTGTGGCCGCCGCTACCGTTTCGAGGGCGAGGGTGACATACAGCGTTTCCAGCGGGACTTTGT  
GTCCCGCTGTGGCTCACATACCGCCGGGACTTCCCGCCCCCTTCTGGGGGCTGCCTGACCTCGGACTGT  
GGCTGGGGGTGCATGTTACGCAGCGGCCAGATGATGCTGGCACAGGGCCTTCTGCTGCATTTCTGCCCA  
GAGACTGGACATGGGCCGAGGGCATGGGCCTGGGCCCCCTGAGCTGTCAGGGTCAGCCTCTCCAGCCG  
GTACCATGGGCCTGCCCGCTGGATGCCCCACGCTGGGCCAGGGTGCCCTGAGCTGGAGCAGGAACGC  
CGGCACCGGCAGATTGTGTCCTGGTTCGCCGACCACCCCGGGCCCCCTTTGGCCTACACGGCTGGTGG  
AGCTTGGGCAGAGCTCAGGCAAGAAGGCAGGTGACTGGTATGGGCCATCGCTAGTGGCACACATCCTCAG  
GAAAGCCGTGGAGAGCTGCTCCGACGTACCCGCCTGGTGGTGTACGTTTCTCAGGACTGCACAGTGTAC  
AAGGCGGATGTGGCACGCCTGGTGGCCAGGCCAGACCCACAGCCGAGTGGAAGTCTGTGGTCATCCTGG

TGCCCCGTGCGACTGGGTGGCGAGACTCTCAACCCCGTGTATGTGCCCTGCGTGAAGGAACTCCTGCGTTG  
CGAGCTGTGCCTGGGCATCATGGGTGGGAAACCGCGACACTCACTGTACTTCATTGGCTACCAAGATGAC  
TTCCTGCTGTACCTGGACCCTCACTACTGCCAGCCCACTGTGGATGTCAGCCAGGCCGACTTCCCCCTGG  
AGTCCTTCCACTGCACCTCGCCCCGCAAGATGGCCTTTGCCAAGATGGACCCAAGCTGTACCGTGGGCTT  
CTATGCTGGAGACAGGAAGGAGTTTGAGACACTCTGCTCAGAGCTGACCAGGGTCCTCAGCTCCTCCTCA  
GCCACAGAGCGGTACCCCATGTTACCCTGGCCGAGGGCCATGCTCAGGACCACAGCCTGGACGACCTCT  
GCTCCAGCTCGCCAGCCCACTCCGGCTCCCTCGCACAGGGCGGCTCCTCAGGGCCAAACGCCCCAG  
CTCTGAGGACTTTGTGTTTTTATAA

>|cl|NM\_004849.4\_cds\_NP\_004840.1\_1 [gene=ATG5] [db\_xref=CCDS:CCDS5055.1] [protein=autophagy  
protein 5 isoform a] [protein\_id=NP\_004840.1] [location=294..1121] [gbkey=CDS]

ATGACAGATGACAAAGATGTGCTTCGAGATGTGTGGTTTGGACGAATTCCAAGTTGTTTCACGCTATATC  
AGGATGAGATAACTGAAAGGGAAGCAGAACCATACTATTTGCTTTTGCCAAGAGTAAGTTATTTGACGTT  
GGTAACTGACAAAGTGAAAAAGCACTTTCAGAAGGTTATGAGACAAGAAGACATTAGTGAGATATGGTTT  
GAATATGAAGGCACACCACTGAAATGGCATTATCCAATTGGTTTGCTATTTGATCTTCTTGATCAAGTT  
CAGCTCTTCCTTGAACATCACAGTACATTTTAAGAGTTTTCCAGAAAAAGACCTTCTGCACTGTCCATC  
TAAGGATGCAATTGAAGCTCATTTTATGTCATGTATGAAAGAAGCTGATGCTTTAAACATAAAAGTCAA  
GTAATCAATGAAATGCAGAAAAAAGATCACAAGCAACTCTGGATGGGATTGCAAAATGACAGATTTGACC  
AGTTTTGGGCCATCAATCGGAAACTCATGGAATATCCTGCAGAAGAAAATGGATTTGTTATATCCCCTT  
TAGAATATATCAGACAACGACTGAAAGACCTTTCATTCAGAAGCTGTTTCGTCCTGTGGCTGCAGATGGA  
CAGTTGCACACACTAGGAGATCTCCTCAAAGAAGTTTGTCTTCTGCTATTGATCCTGAAGATGGGGAAA  
AAAAGAATCAAGTGATGATTCATGGAATTGAGCCAATGTTGGAAACACCTCTGCAGTGGCTGAGTGAACA  
TCTGAGCTACCCGGATAATTTTCTTCATATTAGTATCATCCACAGCCAACAGATTGA

>|cl|NM\_006395.3\_cds\_NP\_006386.1\_1 [gene=ATG7] [db\_xref=CCDS:CCDS2605.1] [protein=ubiquitin-like modifier-activating enzyme ATG7 isoform a] [protein\_id=NP\_006386.1] [location=45..2156] [gbkey=CDS]

ATGGCGGCAGCTACGGGGGATCCTGGACTCTCTAAACTGCAGTTTGCCCTTTTAGTAGTGCCTTGGATG  
TTGGGTTTTGGCATGAGTTGACCCAGAAGAAGCTGAACGAGTATCGGCTGGATGAAGCTCCAAGGACAT  
TAAGGGTTATTACTACAATGGTGACTCTGCTGGGCTGCCAGCTCGCTTAACATTGGAGTTCAGTGCTTTT  
GACATGAGTGCTCCACCCCAGCCGTTGCTGCCAGCTATTGGAACACTGTATAACACCAACACACTCG  
AGTCTTTCAAGACTGCAGATAAGAAGCTCCTTTTGAACAAGCAGCAAATGAGATATGGGAATCCATAAA  
ATCAGGCACTGCTCTTGAAAACCCTGTACTCCTCAACAAGTTCCTCCTCTTGACATTTCAGATCTAAAG  
AAGTACCACTTCTACTATTGGTTTTGCTATCCTGCCCTCTGTCTTCAGAGAGTTTACCTCTCATTGAG  
GGCCAGTGGGTTTGGATCAAAGGTTTTCACTAAAACAGATTGAAGCACTAGAGTGTGCATATGATAATCT  
TTGTCAAACAGAAGGAGTCACAGCTCTTCCTTACTTCTTAATCAAGTATGATGAGAACATGGTGCTGGTT  
TCCTTGCTTAAACACTACAGTGATTTCTTCCAAGGTCAAAGGACGAAGATAACAATTGGTGTATATGATC  
CCTGTAAGTTAGCCCAGTACCCTGGATGGCCTTTGAGGAATTTTTTGGTCCTAGCAGCCACAGATGGAG  
TAGCAGTTTCCAGTCTGTTGAAGTTGTTTGCTTCCGTGACCGTACCATGCAGGGGGCGAGAGACGTTGCC  
CACAGCATCATCTTCGAAGTGAAGCTTCAGAAATGGCATTAGCCCAGATTGTCCTAAAGCAGTTGGAT  
GGGAAAAGAACCAGAAAGGAGGCATGGGACCAAGGATGGTGAACCTCAGTGAATGTATGGACCCTAAAAG  
GTTAGCTGAGTCATCAGTGGATCTAAATCTCAAAGTATGTGTTGGAGATTGGTTCCTACTTTAGACTTG  
GACAAGGTTGTGTCTGTCAAATGTCTGCTGCTTGGAGCCGGCACCTTGGGTTGCAATGTAGCTAGGACGT  
TGATGGGTTGGGGCGTGAGACACATCACATTTGTGGACAATGCCAAGATCTCCTACTCCAATCCTGTGAG  
GCAGCCTCTCTATGAGTTTGAAGATTGCCTAGGGGGTGGTAAGCCCAAGGCTCTGGCAGCAGCGGACCGG  
CTCCAGAAAATATCCCCGGTGTGAATGCCAGAGGATTCAACATGAGCATACTATGCCTGGGCATCCAG

TGAACTTCTCCAGTGTCACTCTGGAGCAAGCCCGCAGAGATGTGGAGCAACTGGAGCAGCTCATCGAAAG  
CCATGATGTCGTCTTCCTATTGATGGACACCAGGGAGAGCCGGTGGCTTCCTGCCGTCATTGCTGCAAGC  
AAGAGAAAGCTGGTCATCAATGCTGCTTTGGGATTTGACACATTTGTTGTCATGAGACATGGTCTGAAGA  
AACCAAAGCAGCAAGGAGCTGGGGACTTGTGTCCAAACCACCCTGTGGCATCTGCTGACCTCCTGGGCTC  
ATCGCTTTTTGCCAACATCCCTGGTTACAAGCTTGGCTGCTACTTCTGCAATGATGTGGTGGCCCCAGGA  
GATTCAACCAGAGACCGGACCTTGGACCAGCAGTGAAGTGTGAGTCGTCCAGGACTGGCCGTGATTGCAG  
GAGCCCTGGCCGTGGAATTGATGGTATCTGTTTTGCAGCATCCAGAAGGGGGCTATGCCATTGCCAGCAG  
CAGTGACGATCGGATGAATGAGCCTCCAACCTCTCTTGGGCTTGTGCCTCACCAGATCCGGGGATTTCTT  
TCACGGTTTGATAATGTCCTTCCCGTCAGCCTGGCATTGACAAATGTACAGCTTGTTCTTCCAAAGTTC  
TTGATCAATATGAACGAGAAGGATTTAACTTCCTAGCCAAGGTGTTTAATTCTTCACATTCCTTCTTAGA  
AGACTTGACTGGTCTTACATTGCTGCATCAAGAAACCCAAGCTGCTGAGATCTGGGACATGAGCGATGAT  
GAGACCATCTGA

>|cl|NM\_024085.5\_cds\_NP\_076990.4\_1 [gene=ATG9A] [db\_xref=CCDS:CCDS42820.1]  
[protein=autophagy-related protein 9A] [protein\_id=NP\_076990.4] [location=132..2651] [gbkey=CDS]

ATGGCGCAGTTTGACACTGAATACCAGCGCCTAGAGGCCTCCTATAGTGATTACCCCCAGGGGAGGAGG  
ACCTGTTGGTGCACGTCGCCGAGGGGAGCAAGTCACCTTGGCACCATATTGAAAACCTTGACCTCTTCTT  
CTCTCGAGTTTATAATCTGCACCAGAAGAATGGCTTCACATGTATGCTCATCGGGGAGATCTTTGAGCTC  
ATGCAGTTCCTCTTTGTGGTTGCCTTCACTACCTCCTGGTCAGCTGCGTGGACTATGACATCCTATTTG  
CCAACAAGATGGTGAACCACAGTCTTCACCCTACTGAACCCGTCAAGGTCACTCTGCCAGACGCCTTTTT  
GCCTGCTCAAGTCTGTAGTGCCAGGATTCAGGAAAATGGCTCCCTTATCACCATCCTGGTCATTGCTGGT  
GTCTTCTGGATCCACCGGCTTATCAAGTTCATCTATAACATTTGCTGCTACTGGGAGATCCACTCCTTCT  
ACCTGCACGCTCTGCGCATCCCTATGTCTGCCCTTCCGTATTGCACGTGGCAAGAAGTGCAGGCCCGGAT

CGTGCAGACGCAGAAGGAGCACCAGATCTGCATCCACAAACGTGAGCTGACAGAACTGGACATCTACCAC  
CGCATCCTCCGTTTCCAGAACTACATGGTGGCACTGGTTAACAAATCCCTCCTGCCTCTGCGCTTCCGCC  
TGCCTGGCCTCGGGGAAGCTGTCTTCTTACCCGTGGTCTCAAGTACAACCTTTGAGCTGATCCTCTTCTG  
GGGACCTGGCTCTCTGTTTCTCAATGAATGGAGCCTCAAGGCCGAGTACAAACGTGGGGGGCAACGGCTA  
GAGCTGGCCCAGCGCCTCAGCAACCGCATCCTGTGGATTGGCATCGCTAACTTCTGCTGTGCCCCCTCA  
TCCTCATATGGCAAATCCTCTATGCCTTCTTCACTATGCTGAGGTGCTGAAGCGGGAGCCGGGGGCCCT  
GGGAGCACGCTGCTGGTCACTCTATGGCCGCTGCTACCTCCGCCACTTCAACGAGCTGGAGCACGAGCTG  
CAGTCCCGCCTCAACCGTGGCTACAAGCCCGCCTCCAAGTACATGAATTGCTTCTTGTACCTCTTTTGA  
CACTGCTGGCCAAGAATGGAGCCTTCTTCGCTGGCTCCATCCTGGCTGTGCTTATTGCCCTCACCATTTA  
TGACGAAGATGTGTTGGCTGTGGAACATGTGCTGACCACCGTCACACTCCTGGGGGTACCGTGACCGTG  
TGCAGGTCCTTTATCCCGGACCAGCACATGGTGTCTGCCCTGAGCAGCTGCTCCGCGTGATCCTCGCTC  
ACATCCACTACATGCCTGACCACTGGCAGGGTAATGCCACCGCTCGCAGACCCGGGACGAGTTTGCCCA  
GCTCTTCCAGTACAAGGCAGTGTTCAATTTGGAAGAGTTGCTGAGCCCCATTGTCACACCCCTCATCCTC  
ATCTTCTGCCTGCGCCACGGGCCCTGGAGATTATAGACTTCTCCGAACTTCACCGTGGAGGTCGTTG  
GTGTGGGAGATACCTGCTCCTTTGCTCAGATGGATGTTGCCAGCATGGTCATCCCCAGTGGCTATCTGC  
TGGGCAGACAGAGGCCTCAGTGTACCAGCAAGCTGAGGATGGAAAGACAGAGTTGTCACTCATGCACTTT  
GCCATACCAACCCTGGCTGGCAGCCACCACGTGAGAGCACAGCCTTCTAGGCTTCTCAAGGAGCAGG  
TTCAGCGGGATGGAGCAGCTGCTAGCCTCGCCCAAGGGGGTCTGCTCCCTGAAAATGCCCTCTTTACGTC  
TATCCAGTCCTTACAATCTGAGTCTGAGCCCCTGAGCCTTATCGCAAATGTGGTAGCTGGCTCATCCTGC  
CGGGGCCCTCCACTGCCAGAGACCTGCAGGGCTCCAGGCACAGGGCTGAAGTCGCTCTGCCCTGCGCT  
CCTTCTCCCCGCTGCAACCCGGGCAGGCGCCACAGGCCGGGCTCACAGCACCATGACAGGCTCTGGGGT  
GGATGCCAGGACAGCCAGCTCCGGGAGCAGCGTGTGGGAAGGACAGCTGCAGAGCCTGGTGTGTCAGAA  
TATGCATCCACAGAGATGAGCCTGCATGCCCTCTATATGCACCAGCTCCACAAGCAGCAGGCCCAGGCTG  
AACCTGAGCGGCATGTATGGCACCGCCGGGAGAGTGATGAGAGTGAGAGAAAGCGCCCCTGATGAAGGGGG  
AGAGGGCGCCCGGGCCCCCAGTCTATCCCTCGCTCTGCTAGCTATCCCTGTGCAGCACCCCGGCCTGGA

GTCCTGAGACCACTGCCCTGCATGGGGGCTTCCAGAGGCGCTACGGTGGCATCACAGATCCTGGCACAG  
TGCCAGGGTTCCCTCTCATTTCTCTCGGCTGCCTCTTGAGGGTGGGCAGAAGATGGGCAGTCGGCATC  
AAGGCACCCTGAGCCCGTGCCGAAGAGGGCTCGGAGGATGAGCTACCCCTCAGGTGCACAAGGTATAG

>|cl|NM\_001317056.2\_cds\_NP\_001303985.1\_1 [gene=ATG9B] [db\_xref=CCDS:CCDS83242.1]  
[protein=autophagy-related protein 9B] [protein\_id=NP\_001303985.1] [location=72..2846] [gbkey=CDS]

ATGGTGAGCCGAATGGGCTGGGGGGGAGAAGAAGGCGGCTGGGGCGGTGGGGAGATCTGGGGCCCGGAT  
CGGTGCCCCTCCTCCCATGCCACTGCCACCTCCTCCTCCTTCATGCCGGGGACCTGGGGGAGGGAG  
GATCTCCATCTTCTCTGTCCCCTGCCCCTCATACAAGAAGCTCCCCCTCCTCATTTTCCCCTCCCACC  
GCAGGGCCCCCTTGCTCAGTGCTACAGGGGACAGGGGCTTCTCAGTCTTGCCACAGTGCTCTCCCTATCC  
CAGCCACCCCCCAACACAGGCTCAACCTGCAATGACACCTGCCTCTGCATCTCCCTCCTGGGGATCCCA  
CTCCACCCACCCCTGGCCCCGGCAACCCCACTCCCTCACAGCAGTGCCCCCAGGACTCTCCTGGGCTG  
CGGGTAGGCCCTTTGATCCCTGAACAGGATTATGAGCGGCTGGAGGACTGTGACCCTGAGGGGTCCCAAG  
ACTACCCATCCACGGGGAGGAGCAGCAACCCCTGCTTCATGTCCCTGAAGGGCTCCGAGGCTCCTGGCA  
TCACATCCAGAACCTGGACAGTTTCTTACCAAGATCTACAGCTACCACCAGCGGAATGGCTTTGCCTGC  
ATCTTGCTGGAGGATGTCTCCAGCTGGGACAATTTATTTTCATTGTACCTTCACAACCTTCCTCCTTC  
GATGCGTGGATTACAATGTTCTTTGCCAACCAACCAAGTAACCATACCAGACCTGGGCCGTTCACAG  
CAAAGTGACCCTGTCAGATGCCATCCTACCCTCAGCCCAGTGTGCTGAGAGGATCCGCTCCAGCCCGCTG  
CTGGTCCTCCTCCTGGTCCTGGCTGCCGGCTTCTGGCTGGTCCAACCTGCTTCGCTCAGTCTGCAACCTCT  
TCAGCTACTGGGACATCCAGGTGTTTTACAGGGAGGCCCTGCACATCCCCCGGAGGAGCTGAGCTCGGT  
TCCCTGGGCAGAGGTGCAGTCCCGCTCTTGCGACTGCAGCGGAGCGGGGGCCTGTGCGTGCAGCCGCGG  
CCCCTGACGGAGCTGGACATCCACCACGCATCCTGCGCTACACCAACTACCAGGTGGCGCTGGCCAACA  
AAGGCCTGCTGCCGGCCCCGCTGCCCGCTGCCCTGGGGAGGCAGTGCGGCTTTCCTCAGCCGCGGCCTGGC  
GCTCAATGTCGACCTGCTGCTCTCCGCGGTCCCTTCTCGCTCTCCGCGGGGGCTGGGAGCTGCCGCAC

GCCTACAAGCGCAGCGACCAGCGGGGCGCCCTAGCAGCGCGCTGGGGGCGCACAGTGCTGCTGCTGGCCG  
CCCTGAACCTGGCGCTGAGCCCGCTGGTGCTGGCCTGGCAGGTTCTGCACGTCTTCTATAGCCACGTGGA  
GCTGCTGCGGGCGGAGCCTGGCGCGCTGGGGGCGCGCGGCTGGTCCCGCCTGGCGCGCTTGACAGCTGCGC  
CACTTCAACGAGCTGCCGCACGAGCTGCGCGCGCGCCTGGCCCGCGCCTACCGCCCCGCCGCCCTTCC  
TGCGCACCGCTGCGCCCCCGCGCCCCTGCGCACGCTGCTGGCCCGCCAGCTCGTTTTCTTCGCGGGTGC  
ACTCTTCGCCGCGCTGCTTGCTCACCGTCTACGACGAGGACGTGCTAGCCGTGGAGCACGTGCTCACC  
GCCATGACCGCGCTCGGGGTACCGCCACCGTCGCCAGGTCTTTCATTCCGGAAGAGCAGTGCCAGGGTC  
GTGCGCCGAGCTCCTGCTGCAGACAGCCCTGGCCACATGCACTACCTCCCGGAGGAGCCCGGCCCCGG  
CGGCAGGGACCGCGCCTACCGGCAGATGGCGCAGCTGCTGCAGTACCGAGCGGTCTCCCTCCTGGAGGAG  
CTCCTGTCCCCGCTCCTCACCCCGCTGTTTCTGCTTTTCTGGTTCCGCCCTCGTGCCCTGGAGATTATCG  
ACTTTTTTCATCACTTCACTGTGGATGTGGCTGGGGTTGGGGACATCTGTTCTTTGCCCTTATGGATGT  
GAAGCGCCACGGACACCCTCAGTGGCTCTCGGCGGGACAGACTGAGGCCTCGCTGTCTCAGCGTGCGGAG  
GACGGCAAGACTGAGCTTTCTTTGATGCGGTTCTCCCTGGCGCATCCACTCTGGCGCCCCCAGGGCACA  
GCTCTAAGTTTCTTGGGCACCTCTGGGGCCGAGTACAACAAGATGCAGCTGCCTGGGGTGCCACCTCGGC  
TCGCGGGCCCTCCACCCCGGGGGTGCTCAGCAACTGCACCTCGCCCCTGCCTGAGGCCTTCTTGGCCAAC  
CTCTTCGTGCACCCTCTCCTGCCTCCGAGAGATCTGAGCCCGACAGCCCCCTGTCCAGCTGCGGCCACAG  
CCAGCCTCCTTGCCTCCATTTCCCGAATTGCCAGGACCCAGCTCTGTGTCCCAGGAGGCACTGGGGG  
CCAGAAGCTGGCCCAGCTCCAGAACTTGCTTCTGCCGAGATGAGTCTCCATGTCATCTACCTGCACCAG  
CTTACCAGCAGCAGCAGCAGCAGGAGCCGTGGGGTGAGGCTGCAGCCTCCATCCTGTCCAGGCCCTGCT  
CCAGCCCCTCACAGCCACCCTGCCTGATGAGGAGAAGCCATCCTGGTCAAGTGACGGCTCCAGTCCTGC  
CTCTAGCCCCAGACAACAGTGGGGAACCCAGAAGGCCCGGAATCTGTTCCCCGAGGGTTTCAGGTGACC  
ACAGACACCCAGAAGGAGCCTGACCGGGCCTCTTGCACTGACTGA

>|cl|NM\_004044.7\_cds\_NP\_004035.2\_1 [gene=ATIC] [db\_xref=CCDS:CCDS2398.1] [protein=bifunctional purine biosynthesis protein ATIC] [protein\_id=NP\_004035.2] [location=85..1863] [gbkey=CDS]

ATGGCTCCCGGCCAGCTCGCCTTATTTAGTGTCTCTGACAAAACCGGCCTTGTGGAATTTGCAAGAAACC  
TGACCGCTCTTGTTTGAATCTGGTCGCTTCCGGAGGGACTGCAAAGCTCTCAGGGATGCTGGTCTGGC  
AGTCAGAGATGTCTCTGAGTTGACGGGATTTCTGAAATGTTGGGGGACGTGTGAAAACCTTGCATCCT  
GCAGTCCATGCTGGAATCCTAGCTCGTAATATTCCAGAAGATAATGCTGACATGGCCAGACTTGATTCA  
ATCTTATAAGAGTTGTTGCCTGCAATCTCTATCCCTTTGTAAAGACAGTGGCTTCTCCAGGTGTAAGTGT  
TGAGGAGGCTGTGGAGCAAATTGACATTGGTGGAGTAACCTTACTGAGAGCTGCAGCCAAAAACCACGCT  
CGAGTGACAGTGGTGTGTGAACCAGAGGACTATGTGGTGGTGTCCACGGAGATGCAGAGCTCCGAGAGTA  
AGGACACCTCCTTGGAGACTAGACGCCAGTTAGCCTTGAAGGCATTCACTCATACGGCACAATATGATGA  
AGCAATTCAGATTATTTTCAGGAAACAGTACAGCAAAGGCGTATCTCAGATGCCCTTGAGATATGGAATG  
AACCACATCAGACCCCTGCCAGCTGTACACACTGCAGCCCAAGCTTCCCATCACAGTTCTAAATGGAG  
CCCCTGGATTATATAAACTTGTGCGATGCTTTGAACGCCTGGCAGCTGGTGAAGGAACTCAAGGAGGCTTT  
AGGTATTCCAGCCGCTGCCTCTTCAAACATGTCAGCCCAGCAGGTGCTGCTGTTGGAATTCCACTCAGT  
GAAGATGAGGCCAAAGTCTGCATGGTTTATGATCTCTATAAAACCCTCACACCCATCTCAGCGGCATATG  
CAAGAGCAAGAGGGGCTGATAGGATGTCTTCATTGGTGATTTTGTTGCATTGTCCGATGTTTGTGATGT  
ACCAACTGCAAAAATTATTTCCAGAGAAGTATCTGATGGTATAATTGCCCCAGGATATGAAGAAGAAGCC  
TTGACAATACTTTCCAAAAGAAAAATGGAACTATTGTGTCCTTCAGATGGACCAATCTTACAAACCAG  
ATGAAAATGAAGTTCGAACTCTCTTTGGTCTTCATTTAAGCCAGAAGAGAAATAATGGTGTGTCGACAA  
GTCATTATTTAGCAATGTTGTTACCAAAAATAAAGATTTGCCAGAGTCTGCCCTCCGAGACCTCATCGTA  
GCCACCATGCTGTCAAGTACACTCAGTCTAACTCTGTGTGCTACGCCAAGAACGGGCAGGTTATCGGCA  
TTGGAGCAGGACAGCAGTCTCGTATACACTGCACTCGCCTTGCAAGGAGATAAGGCAAACCTATTGGTGGCT  
TAGACACCATCCACAAGTGCTTTTCGATGAAGTTTAAACAGGAGTGAAGAGAGCAGAAATCTCCAATGCC  
ATCGATCAATATGTGACTGGAACCATTTGGCGAGGATGAAGATTTGATAAAGTGGAAGGCACTGTTTGAGG  
AAGTCCCTGAGTTACTCACTGAGGCAGAGAAGAAGGAATGGGTTGAGAACTGACTGAAGTTTCTATCAG

CTCTGATGCCTTCTTCCCTTCCGAGATAACGTAGACAGAGCTAAAAGGAGTGGTGTGGCGTACATTGCG  
GCTCCCTCCGGTTCTGCTGCTGACAAAGTTGTGATTGAGGCCTGCGACGAACTGGGAATCATCCTCGCTC  
ATACGAACCTTCGGCTCTTCCACCACTGA

>|cl|NM\_004323.6\_cds\_NP\_004314.6\_1 [gene=BAG1] [db\_xref=CCDS:CCDS35004.1] [protein=BAG  
family molecular chaperone regulator 1 isoform BAG-1L] [protein\_id=NP\_004314.6] [location=35..1072]  
[gbkey=CDS]

CTGGCTCAGCGCGGGGGGGCGCGGAGACCGCGAGGCGACCGGGAGCGGCTGGGTCCCCGGCTGCGCGCCC  
TTCGGCCAGGCCGGGAGCCGCGCCAGTCGGAGCCCCCGGCCAGCGTGGTCCGCCTCCCTCTGGGCGTCC  
ACCTGCCCCGAGTACTGCCAGCGGGCATGACCGACCCACCAGGGGCGCCGCCGCCGGCGCTCGCAGGCCG  
CGGATGAAGAAGAAAACCCGGCGCCGCTCGACCCGGAGCGAGGAGTTGACCCGGAGCGAGGAGTTGACCC  
TGAGTGAGGAAGCGACCTGGAGTGAAGAGGCGACCCAGAGTGAGGAGGCGACCCAGGGCGAAGAGATGAA  
TCGGAGCCAGGAGGTGACCCGGGACGAGGAGTCGACCCGGAGCGAGGAGGTGACCAGGGAGGAAATGGCG  
GCAGCTGGGCTCACCGTGA CTGTCACCCACAGCAATGAGAAGCACGACCTTCATGTTACCTCCCAGCAGG  
GCAGCAGTGAACCAGTTGTCCAAGACCTGGCCCAGGTTGTTGAAGAGGTCATAGGGGTTCCACAGTCTTT  
TCAGAAACTCATATTTAAGGGAAAATCTCTGAAGGAAATGGAAACACCGTTGTCAGCACTTGGAATACAA  
GATGGTTGCCGGGTCATGTTAATTGGGAAAAAAGAACAGTCCACAGGAAGAGGTTGAACTAAAGAAGTTGA  
AACATTTGGAGAAGTCTGTGGAGAAGATAGCTGACCAGCTGGAAGAGTTGAATAAAGAGCTTACTGGAAT  
CCAGCAGGGTTTTCTGCCCAAGGATTTGCAAGCTGAAGCTCTCTGCAAACCTGATAGGAGAGTAAAAGCC  
ACAATAGAGCAGTTTATGAAGATCTTGGAGGAGATTGACACACTGATCCTGCCAGAAAATTTCAAAGACA  
GTAGATTGAAAAGGAAAGGCTTGGTAAAAAAGGTTCAGGCATTCTAGCCGAGTGTGACACAGTGGAGCA  
GAACATCTGCCAGGAGACTGAGCGGCTGCACTCTACAACTTTGCCCTGGCCGAGTGA

>|cl|NM\_004281.4\_cds\_NP\_004272.2\_1 [gene=BAG3] [db\_xref=CCDS:CCDS7615.1] [protein=BAG family molecular chaperone regulator 3] [protein\_id=NP\_004272.2] [location=297..2024] [gbkey=CDS]

ATGAGCGCCGCCACCCACTCGCCCATGATGCAGGTGGCGTCCGGCAACGGTGACCGCGACCCTTTGCCCC  
CCGGATGGGAGATCAAGATCGACCCGCAGACCGGCTGGCCCTTCTTCGTGGACCACAACAGCCGCACCAC  
TACGTGGAACGACCCGCGCGTGCCCTCTGAGGGCCCCAAGGAGACTCCATCCTCTGCCAATGGCCCTTCC  
CGGGAGGGCTCTAGGCTGCCGCTGCTAGGGAAGGCCACCCTGTGTACCCCCAGCTCCGACCAGGCTACA  
TTCCCATTCCTGTGCTCCATGAAGGCGCTGAGAACCGGCAGGTGCACCCTTTCATGTCTATCCCCAGCC  
TGGGATGCAGCGATTCCGAACTGAGGCGGCAGCAGCGGCTCCTCAGAGGTCCCAGTCACCTCTGCGGGGC  
ATGCCAGAAACCACTCAGCCAGATAAACAGTGTGGACAGGTGGCAGCGGCGGCGGCAGCCAGCCCCCAG  
CCTCCACGGACCTGAGCGGTCCCAGTCTCCAGCTGCCTCTGACTGCTCATCCTCATCCTCCTCGGCCAG  
CCTGCCTTCCTCCGGCAGGAGCAGCCTGGGCAGTCACCAGCTCCCGCGGGGGTACATCTCCATTCCGGTG  
ATACACGAGCAGAACGTTACCCGGCCAGCAGCCCAGCCCTCCTTCCACCAAGCCCAGAAGACGCACTACC  
CAGCGCAGCAGGGGGAGTACCAGACCCACCAGCCTGTGTACCACAAGATCCAGGGGGATGACTGGGAGCC  
CCGGCCCCCTGCGGGCGGCATCCCCGTTCAAGTCATCTGTCCAGGGTGCATCGAGCCGGGAGGGCTACCA  
GCCAGGAGCAGCACGCCACTCCACTCCCCCTCGCCCATCCGTGTGCACACCGTGGTCGACAGGCCTCAGC  
AGCCCATGACCCATCGAGAACTGCACCTGTTTCCCAGCCTGAAAACAAACCAGAAAGTAAGCCAGGCCC  
AGTTGGACCAGAACTCCCTCCTGGACACATCCCAATTCAAGTGATCCGCAAAGAGGTGGATTCTAAACCT  
GTTTCCCAGAAGCCCCACCTCCCTCTGAGAAGGTAGAGGTGAAAGTTCCCCCTGCTCCAGTTCCTTGTC  
CTCCTCCCAGCCCTGGCCCTTCTGCTGTCCCCTCTTCCCCAAGAGTGTGGCTACAGAAGAGAGGGCAGC  
CCCCAGCACTGCCCTGCAGAAGCTACACCTCCAAAACCAGGAGAAGCCGAGGCTCCCCCAAAACATCCA  
GGAGTGCTGAAAGTGGAAGCCATCCTGGAGAAGGTACAGGGGCTGGAGCAGGCTGTAGACAACCTTTGAAG  
GCAAGAAGACTGACAAAAAGTACCTGATGATCGAAGAGTATTTGACCAAAGAGCTGCTGGCCCTGGATTC  
AGTGGACCCCGAGGGACGAGCCGATGTGCGTCAGGCCAGGAGAGACGGTGTGAGGAAGGTTTCAGACCATC

TTGGAAAACTTGAACAGAAAGCCATTGATGTCCCAGGTCAAGTCCAGGTCTATGAACTCCAGCCCAGCA  
ACCTTGAAGCAGATCAGCCACTGCAGGCAATCATGGAGATGGGTGCCGTGGCAGCAGACAAGGGCAAGAA  
AAATGCTGGAAATGCAGAAGATCCCCACACAGAAACCCAGCAGCCAGAAGCCACAGCAGCAGCGACTTCA  
AACCCCAGCAGCATGACAGACACCCCTGGTAACCCAGCAGCACCGTAG

>|cl|NM\_001188.4\_cds\_NP\_001179.1\_1 [gene=BAK1] [db\_xref=CCDS:CCDS4781.1] [protein=bcl-2  
homologous antagonist/killer] [protein\_id=NP\_001179.1] [location=284..919] [gbkey=CDS]

ATGGCTTCGGGGCAAGGCCAGGTCCTCCCAGGCAGGAGTGCGGAGAGCCTGCCCTGCCCTCTGCTTCTG  
AGGAGCAGGTAGCCCAGGACACAGAGGAGGTTTTCCGCAGCTACGTTTTTACCGCCATCAGCAGGAACA  
GGAGGCTGAAGGGGTGGCTGCCCCTGCCGACCCAGAGATGGTCACCTTACCTCTGCAACCTAGCAGCACC  
ATGGGGCAGGTGGGACGGCAGCTCGCCATCATCGGGGACGACATCAACCGACGCTATGACTCAGAGTTCC  
AGACCATGTTGCAGCACCTGCAGCCACGGCAGAGAATGCCTATGAGTACTTCACCAAGATTGCCACCAG  
CCTGTTTGAGAGTGGCATCAATTGGGGCCGTGTGGTGGCTCTTCTGGGCTTCGGCTACCGTCTGGCCCTA  
CACGTCTACCAGCATGGCCTGACTGGCTTCCTAGGCCAGGTGACCCGCTTCGTGGTCGACTTCATGCTGC  
ATCACTGCATTGCCCCGGTGGATTGCACAGAGGGGTGGCTGGGTGGCAGCCCTGAACTGGGGCAATGGTCC  
CATCCTGAACGTGCTGGTGGTTCTGGGTGTGGTTCTGTTGGGCCAGTTTGTGGTACGAAGATTCTTCAA  
TCATGA

>|cl|NM\_138763.4\_cds\_NP\_620118.1\_1 [gene=BAX] [db\_xref=CCDS:CCDS12743.1] [protein=apoptosis  
regulator BAX isoform delta] [protein\_id=NP\_620118.1] [location=55..486] [gbkey=CDS]

ATGGACGGGTCCGGGAGCAGCCCAGAGGCGGGGGGCCACCAGCTCTGAGCAGATCATGAAGACAGGGG  
CCCTTTTGCTTCAGGGGATGATTGCCGCCGTGGACACAGACTCCCCCGAGAGGTCTTTTCCGAGTGGC  
AGCTGACATGTTTTCTGACGGCAACTCAACTGGGGCCGGGTTGTCGCCCTTTCTACTTTGCCAGCAAA  
CTGGTGCTCAAGGCCCTGTGCACCAAGGTGCCGGAAGTATCAGAACCATCATGGGCTGGACATTGGACT  
TCCTCCGGGAGCGGCTGTTGGGCTGGATCCAAGACCAGGGTGGTTGGGACGGCCTCCTCTCCTACTTTGG  
GACGCCCACGTGGCAGACCGTGACCATCTTTGTGGCGGGAGTGCTCACCGCCTCACTCACCATCTGGAAG  
AAGATGGGCTGA

>|cl|NM\_000633.3\_cds\_NP\_000624.2\_1 [gene=BCL2] [db\_xref=CCDS:CCDS11981.1] [protein=apoptosis  
regulator Bcl-2 isoform alpha] [protein\_id=NP\_000624.2] [location=883..1602] [gbkey=CDS]

ATGGCGCACGCTGGGAGAACAGGGTACGATAACCGGGAGATAGTGATGAAGTACATCCATTATAAGCTGT  
CGCAGAGGGGCTACGAGTGGGATGCGGGAGATGTGGGCGCCGCGCCCCGGGGGCCGCCCCGCACCGGG  
CATCTTCTCCTCCCAGCCCGGGCACACGCCCCATCCAGCCGCATCCCGGGACCCGGTCGCCAGGACCTCG  
CCGCTGCAGACCCCGGCTGCCCCGGCGCCGCCGCGGGGCTGCGCTCAGCCCGGTGCCACCTGTGGTCC  
ACCTGACCCTCCGCCAGGCCGGCGACGACTTCTCCCGCCGCTACCGCCGCGACTTCGCCGAGATGTCCAG  
CCAGCTGCACCTGACGCCCTTACCGCGCGGGGACGCTTTGCCACGGTGGTGGAGGAGCTCTTCAGGGAC  
GGGGTGAAGTGGGGGAGGATTGTGGCCTTCTTTGAGTTCGGTGGGGTCATGTGTGTGGAGAGCGTCAACC  
GGGAGATGTCGCCCTGGTGGACAACATCGCCCTGTGGATGACTGAGTACCTGAACCGGCACCTGCACAC  
CTGGATCCAGGATAACGGAGGCTGGGATGCCTTTGTGGAAGTGTACGGCCCCAGCATGCGGCCTCTGTTT  
GATTTCTCCTGGCTGTCTCTGAAGACTCTGCTCAGTTTGGCCCTGGTGGGAGCTTGCATCACCTGGGTG  
CCTATCTGGGCCACAAGTGA

>|cl|NM\_138578.3\_cds\_NP\_612815.1\_1 [gene=BCL2L1] [db\_xref=CCDS:CCDS13189.1] [protein=bcl-2-like protein 1 isoform Bcl-X(L)] [protein\_id=NP\_612815.1] [location=382..1083] [gbkey=CDS]

ATGTCTCAGAGCAACCGGGAGCTGGTGGTTGACTTTCTCTCTACAAGCTTTCCCAGAAAGGATACAGCT  
GGAGTCAGTTTAGTGATGTGGAAGAGAACAGGACTGAGGCCCCAGAAGGGACTGAATCGGAGATGGAGAC  
CCCCAGTGCCATCAATGGCAACCCATCCTGGCACCTGGCAGACAGCCCCGCGGTGAATGGAGCCACTGGC  
CACAGCAGCAGTTTGGATGCCCCGGGAGGTGATCCCCATGGCAGCAGTAAAGCAAGCGCTGAGGGAGGCAG  
GCGACGAGTTTGAAGTACCGGCGGGCATTGAGTGACCTGACATCCCAGCTCCACATCACCCCAGG  
GACAGCATATCAGAGCTTTGAACAGGTAGTGAATGAAGTCTTCCGGGATGGGGTAAAGTGGGGTCGCATT  
GTGGCCTTTTTCTCTTCGGCGGGGCACTGTGCGTGGAAGCGTAGACAAGGAGATGCAGGTATTGGTGA  
GTCGGATCGCAGCTTGGATGGCCACTTACCTGAATGACCACCTAGAGCCTTGGATCCAGGAGAACGGCGG  
CTGGGATACTTTTGTGGAAGTCTATGGGAACAATGCAGCAGCCGAGAGCCGAAAGGGCCAGGAACGCTTC  
AACCGCTGGTTCCTGACGGGCATGACTGTGGCCGGCGTGTTCTGCTGGGCTCACTCTTCAGTCGGAAAT  
GA

>|cl|NM\_003766.5\_cds\_NP\_003757.1\_1 [gene=BECN1] [db\_xref=CCDS:CCDS11441.1] [protein=beclin-1 isoform a] [protein\_id=NP\_003757.1] [location=153..1505] [gbkey=CDS]

ATGGAAGGGTCTAAGACGTCCAACAACAGCACCATGCAGGTGAGCTTCGTGTGCCAGCGCTGCAGCCAGC  
CCCTGAAACTGGACACGAGTTTCAAGATCCTGGACCGTGTACCATCCAGGAACTCACAGCTCCATTACT  
TACCACAGCCCAGGCGAAACCAGGAGAGACCCAGGAGGAAGAGACTAACTCAGGAGAGGAGCCATTTATT  
GAAACTCCTCGCCAGGATGGTGTCTCTCGCAGATTCATCCCCCAGCCAGGATGATGTCCACAGAAAGTG  
CCAACAGCTTCACTCTGATTGGGGAGGCATCTGATGGCGGCACCATGGAGAACCTCAGCCGAAGACTGAA

GGTCACTGGGGACCTTTTTGACATCATGTCGGGCCAGACAGATGTGGATCACCCACTCTGTGAGGAATGC  
ACAGATACTCTTTTAGACCAGCTGGACACTCAGCTCAACGTCACTGAAAATGAGTGTGAGAACTACAAAC  
GCTGTTTGGAGATCTTAGAGCAAATGAATGAGGATGACAGTGAACAGTTACAGATGGAGCTAAAGGAGCT  
GGCACTAGAGGAGGAGAGGCTGATCCAGGAGCTGGAAGACGTGGAAAAGAACCGCAAGATAGTGGCAGAA  
AATCTCGAGAAGGTCCAGGCTGAGGCTGAGAGACTGGATCAGGAGGAAGCTCAGTATCAGAGAGAATACA  
GTGAATTTAAACGACAGCAGCTGGAGCTGGATGATGAGCTGAAGAGTGTTGAAAACCAGATGCGTTATGC  
CCAGACGCAGCTGGATAAGCTGAAGAAAACCAACGTCTTTAATGCAACCTTCCACATCTGGCACAGTGGA  
CAGTTTGGCACAATCAATAACTTCAGGCTGGGTGCGCTGCCAGTGTTCCCGTGGGAATGGAATGAGATTA  
ATGCTGCTTGGGGCCAGACTGTGTTGCTGCTCCATGCTCTGGCCAATAAGATGGGTCTGAAATTTAGAG  
ATACCGACTTGTTCTTACGGAAACCATTATATCTGGAGTCTCTGACAGACAAATCTAAGGAGCTGCCG  
TTATACTGTTCTGGGGGGTTGCGGTTTTTCTGGGACAACAAGTTTGACCATGCAATGGTGGCTTTCCTGG  
ACTGTGTGCAGCAGTTCAAAGAAGAGGTTGAGAAAGGCGAGACACGTTTTTGTCTTCCCTACAGGATGGA  
TGTGGAGAAAGGCAAGATTGAAGACACAGGAGGCAGTGGCGGCTCCTATTCCATCAAAACCCAGTTTAAC  
TCTGAGGAGCAGTGGACAAAAGCTCTCAAGTTCATGCTGACGAATCTTAAGTGGGGTCTTGCTTGGGTGT  
CCTCACAATTTTATAACAAATGA

>|cl|NM\_001290693.1\_cds\_NP\_001277622.1\_1 [gene=BECN2] [db\_xref=CCDS:CCDS81433.1]  
[protein=beclin-2] [protein\_id=NP\_001277622.1] [location=1..1296] [gbkey=CDS]

ATGTCTTCCATCCGCTTCCTGTGCCAGCGCTGCCACCAGGCCCTGAAGCTGAGCGGCTCCTCGGAGTCTA  
GGAGCCTCCCTGCAGCCCCGGCGCCACCTCTGGGCAGGCTGAGCCCGGAGACACCCGGGAGCCCGGCGT  
CACCACCAGGGAGGTGACAGACGCTGAGGAGCAACAGGACGGTGCCTCTAGCAGATCCCCTCCAGGCGAT  
GGCAGTGTGTCCAAGGGCCATGCCAACATCTTCACCCTGCTGGGGGAGCTTGGCGCCATGCACATGCTCA  
GTAGCATCCAGAAGGCAGCTGGTGACATTTTTGACATAGTCTCTGGCCAAGCAGTTGTGGACCATCCCCT

GTGTGAAGAATGCACCGACAGTCTTTTAGAGCAGCTGGACATCCAGCTCGCTCTCACAGAAGCTGACAGT  
CAGAACTACCAACGCTGCCTGGAGACCGGGGAGCTGGCGACCAGCGAGGACGAGGCGGCGGCGCTGCGGG  
CGGAGCTGCGGGACCTGGAGCTGGAGGAGGCCAGGCTGGTGCAGGAGCTGGAGGATGTGGACAGGAACAA  
TGCAAGAGCAGCGGCGGATCTCCAGGCAGCCCAGGCAGAGGCTGCGGAGCTGGACCAGCAGGAGAGGCAG  
CACTACAGGGACTACAGTGCCTTGAAGCGGCAGCAGCTGGAAGTCTTGATCAGCTGGGGAACGTGGAGA  
ACCAGCTGCAGTATGCCAGGGTCCAGAGGGACCGGCTGAAGGAAATCAACTGTTTCACCGCCACGTTTGA  
GATCTGGGTGGAGGGCCCCCTTGGGCGTCATCAATAACTTCAGGTTGGGCCGCCTCCCCACTGTCCGTGTG  
GGCTGGAATGAGATTAACACTGCCTGGGGACAGGCGGCCTTGCTGCTCCTTACCCTGGCCAATACAATTG  
GACTGCAGTTTCAGAGGTATCGACTCATCCCCTGCGGAAACCATTTCGTATCTGAAGTCTTTAACAGATGA  
CCGCACTGAGCTGCCGTTGTTCTGTTATGGGGGGCAGGATGTTTTCTCAATAACAAGTATGACCGCGCG  
ATGGTGGCCTTCCTGGACTGCATGCAGCAGTTCAAGGAAGAGGCTGAGAAGGGTGAGCTGGGCCTCTCTC  
TGCCCTACGGGATCCAGGTGGAGACAGGCCTGATGGAGGACGTTGGCGGCCGAGGGGAATGCTATTCCAT  
CAGAACCCATCTGAACACGCAGGAGCTGTGGACAAAGGCACTCAAGTTCATGCTTATAAATTTCAAGTGG  
AGTCTCATCTGGGTTGCCTCAAGGTATCAAAAGTAG

>|cl|NM\_197966.3\_cds\_NP\_932070.1\_1 [gene=BID] [db\_xref=CCDS:CCDS13747.1] [protein=BH3-  
interacting domain death agonist isoform 1] [protein\_id=NP\_932070.1] [location=295..1020]  
[gbkey=CDS]

ATGTGCAGCGGTGCTGGGGTCATGATGGCTCGGTGGGCAGCGAGGGGCCGGGCCGGCTGGAGGAGCACAG  
TGCGGATTCTGTCGCCACTGGGACACTGTGAACCAGGAGTGAGTCGGAGCTGCCGCGCTGCCAGGCCAT  
GGACTGTGAGGTCAACAACGGTTCCAGCCTCAGGGATGAGTGCATCACAAACCTACTGGTGTGTTGGCTTC  
CTCCAAAGCTGTTCTGACAACAGCTTCCGCAGAGAGCTGGACGCACTGGGCCACGAGCTGCCAGTGCTGG  
CTCCCCAGTGGGAGGGCTACGATGAGCTGCAGACTGATGGCAACCGCAGCAGCCACTCCCGCTTGGGAAG

AATAGAGGCAGATTCTGAAAGTCAAGAAGACATCATCCGGAATATTGCCAGGCACCTCGCCCAGGTCGGG  
GACAGCATGGACCGTAGCATCCCTCCGGGCCTGGTGAACGGCCTGGCCCTGCAGCTCAGGAACACCAGCC  
GGTCGGAGGAGGACCGGAACAGGGACCTGGCCACTGCCCTGGAGCAGCTGCTGCAGGCCTACCCTAGAGA  
CATGGAGAAGGAGAAGACCATGCTGGTGTGGCCCTGCTGCTGGCCAAGAAGGTGGCCAGTCACACGCCG  
TCCTTGCTCCGTGATGTCTTTCACACAACAGTGAATTTTATTAACCAGAACCTACGCACCTACGTGAGGA  
GCTTAGCCAGAAATGGGATGGACTGA

>|cl|NM\_001168.3\_cds\_NP\_001159.2\_1 [gene=BIRC5] [db\_xref=CCDS:CCDS11755.1]  
[protein=baculoviral IAP repeat-containing protein 5 isoform 1] [protein\_id=NP\_001159.2]  
[location=65..493] [gbkey=CDS]

ATGGGTGCCCCGACGTTGCCCCCTGCCTGGCAGCCCTTCTCAAGGACCACCGCATCTCTACATTCAAGA  
ACTGGCCCTTCTTGAGGGCTGCGCCTGCACCCCGAGCGGATGGCCGAGGCTGGCTTCATCCACTGCCC  
CACTGAGAACGAGCCAGACTTGCCCCAGTGTTTCTTCTGCTTCAAGGAGCTGGAAGGCTGGGAGCCAGAT  
GACGACCCCATAGAGGAACATAAAAAGCATTTCGTCCGGTTGCGCTTTCCTTCTGTCAAGAAGCAGTTTG  
AAGAATTAACCCTTGGTGAATTTTGAAGTGGACAGAGAAAGAGCCAAGAACAAAATTGCAAAGGAAAC  
CAACAATAAGAAGAAAGAATTTGAGGAAACTGCGGAGAAAGTGCGCCGTGCCATCGAGCAGCTGGCTGCC  
ATGGATTGA

>|cl|NM\_016252.4\_cds\_NP\_057336.3\_1 [gene=BIRC6] [db\_xref=CCDS:CCDS33175.2]  
[protein=baculoviral IAP repeat-containing protein 6 isoform 1] [protein\_id=NP\_057336.3]  
[location=140..14713] [gbkey=CDS]

ATGGTGA CTGGTGGTGGT GCTGCACCTCCCGGGACTGTCACTGAGCCGCTTCCCAGTGTGATTGTGCTGA  
GCGCAGGCCGGAAGATGGCGGCTGCGGCTGCGGCGGCCTCGGGCCCCGGCTGCTCCTCGGCGGCGGGGGC  
GGGGGCGGCCGGGGTCTCAGAGTGGCTGGT GCTGCGGGACGGCTGCATGCACTGCGACGCCGACGGGCTG  
CACAGCCTGTCCTACCACCCTGCGCTCAACGCCATCCTGGCCGTCACTAGCCGCGGGACCATCAAAGTCA  
TCGACGGCACCTCGGGGGCCACACTGCAGGCCTCCGCGCTCAGTGCTAAACCAGGTGGACAGGTGAAATG  
TCAGTATATCTCTGCTGTGGATAAAGTTATATTTGTGGATGATTATGCAGTAGGGTGTAGGAAGGACCTT  
AATGGAATCTTGTTGTTAGACTGCTCTGCAAACTCCAGTTTCAAAGCAGGATGATGTGGTTCAGCTTG  
AATTACCCGTTACAGAGGCACAGCAGCTCTTATCAGCATGTTTAGAAAAGGTAGATATTTCTAGTACAGA  
GGGTTATGATTTGTTTCATCACACAGCTCAAAGATGGTTTAAAAAATACATCTCATGAGACTGCAGCAAAC  
CACAAAGTTGCTAAGTGGGCCACAGTTACATTTTCATCTTCTCATCATGTGTTGAAGTCCATTGCCAGTG  
CCATTGTAAATGAACTCAAGAAAATAAATCAAAATGTTGCTGCCTTACCTGTGGCGTCCTCAGTGATGGA  
CAGATTGTCTTACCTCTTACCTAGTGCACGTCCAGAACTCGGAGTGGGGCCAGGCCGTTCTGTAGACAGA  
TCACTGATGTATAGTGAAGCTAACAGACGGGAGACATTTACCTCATGGCCTCATGTAGGCTATAGGTGGG  
CACAACCAGATCCCATGGCTCAAGCTGGATTTTATCATCAGCCTGCCTCATCTGGAGATGATAGAGCCAT  
GTGTTTTACTTG TAGTGTATGCCTCGTTTGTTGGGAACCTACTGATGAACCTTGGTCTGAACACGAAAGA  
CATTCCCCAACTGCCCATTTGTGAAAGGTGAGCACACACAGAATGTGCCATTGTCAGTCACTCTTGCAA  
CAAGTCCTGCACAGTTTCCTTGACGGATGGAAGTACAGAAATATCTTGCTTTGGGTCGGGGAGCTGCCC  
TCATTTTCTAGCTGCTGCAACTAAACGAGGAAAAGATCTGCATATGGGATGTTTCCAACTTATGAAGGTG  
CACTTAAAGTTTGAAATTAATGCCTATGATCCAGCAATTGTACAACAGCTTATTCTATCAGGAGACCCAA  
GCTCAGGAGTTGATTCAAGGAGACCAACTTTGGCGTGGCTGGAGGACTCCTCTAGTTGCTCAGATATACC  
AAAATTGGAAGGAGATAGTGATGATTTACTGGAGGATTCAGACAGTGAAGAGCATTCCAGATCAGATTCT  
GTGACAGGGCATACATCACAGAAGGAAGCCATGGAAGTAAGCCTTGATATAACAGCACTCAGCATTCTCC  
AACAGCCAGAAAACTTCAGTGGGAGATTGTTGCAAATGTGCTTGAAGATACTGTTAAGGATCTTGAAGA  
ACTTGGGGCAAATCCTTGTTTAACTCTAAGAGTGAAAAGACAAAGGAAAAGCACCAGGAGCAACAC  
AACATTCCTTTTCATGTTTATTAGCTGGAGGTTTATTAACATATAAATCTCCTGCTACCTACCCATTA

GTAGTAATTCTCACAGGTCCTGGATGGTTTAAGCAGAACTCAGGGTGAAAGTATATCAGAACAAGGGTC  
AACTGACAATGAATCCTGCACTAATTCAGAACTAAATTCTCCTCTGGTAAGGAGGACTTTACCGGTTTTG  
CTTCTTTATAGCATCAAGGAATCTGATGAGAAAGCAGGAAAGATCTTTTCACAGATGAACAATATTATGA  
GTAAAAGTTTGCATGATGATGGTTTTACTGTTCCACAGATTATTGAAATGGAGCTGGATAGTCAGGAGCA  
GTTGTTATTGCAGGATCCTCCTGTGACTTACATTAGCAATTTGCAGATGCAGCAGCCAACCTTACCTCT  
CCGGATTCTGAGAAGTGGAATCTGTGTTTCCCAAGCCTGGGACTTTGGTTCAGTGCTTGAGGCTGCCAA  
AGTTTGCAGAGGAGGAGAATCTTTGTATAGACTCAATAACTCCTTGCTGACGGAATTCATTTGTTGGT  
AGGACTGCGGACATGCCCTGTTGAATCCTTGAGTGCAATAAATCAAGTAGAGGCCTTGAATAATTTAAAT  
AAATTAACTCTGCACTATGTAATAGACGGAAAGGTGAGCTGGAATCAAATCTTGCTGTAGTGAATGGTG  
CAAATATTAGTGAATCCAACATGAATCACCAGCAGATGTACAGACTCCTTTAATAATTCAGCCTGAGCA  
GAGGAATGTTAGTGGTGGATATTTAGTGCTTTATAAAATGAATTATGCCACTCGGATAGTGACTTTAGAA  
GAGGAGCCAATAAAAAATACAACATATCAAAGATCCCCAGGACACAATTACCTCGCTCATTTTGCTTCCAC  
CCGATATATTGGATAATCGAGAGGATGACTGTGAGGAACCTATTGAGGACATGCAGTTAACCTCAAAGAA  
TGTTTTTGAGAGAGAAAAAACGTCTGACATTTCTACTCTTGGACACCTGGTAATAACCACTCAGGGAGGA  
TATGTAAAAATACTAGATCTTTCAACTTTGAAATTTTGGCCAAAGTGGAGCCTCCCAAAAAGGAGGGCA  
CTGAGGAACAGGACACATTTGTTTCTGTGATTTACTGTTCTGGCACAGACAGGCTGTGTGCATGCACCAA  
AGGTGGTGAGCTTCATTTTCTCCAAATTGGAGGAACCTGTGATGATATTGATGAAGCTGATATACTAGTG  
GATGGATCTCTTTCTAAAGGAATAGAACCATCTTCAGAAGGTTCCAAACCTTTATCAAATCCTTCAAGTC  
CTGGCATTTAGGAGTTGATTTATTGGTGGACCAGCCATTCACCCTTGAAATCTTGACATCCCTAGTGGA  
GCTAACCCGCTTTGAGACTTTGACTCCAAGGTTTTAGCGACTGTTCTCCATGCTGGGTAGAAGTTCAA  
CAAGAACAGCAGCAAAGGAGGCATCCTCAACATTTGCATCAGCAACACCATGGTGATGCTGCTCAGCATA  
CTCGAACTTGGAACCTACAGACCGACAGCAACAGCTGGGATGAACATGTATTTGAATTAGTACTACCTAA  
AGCTTGATGGTTGGACATGTGGACTTCAAATTCGTTTTGAACTCAAACATCACCAATATTCCACAGATA  
CAAGTGACACTGCTGAAAAATAAAGCTCCAGGATTAGGGAAAGTCAATGCTCTTAACATTGAAGTGGAAC  
AAAATGGGAAACCGTCCCTGGTTGATTTGAATGAAGAAATGCAGCACATGGATGTAGAGGAATCACAGTG

TCTTAGATTATGTCCATTTTTGGAGGATCATAAAGAAGACATTCTATGTGGGCCAGTATGGCTTGCTAGT  
GGCCTTGATCTATCAGGGCATGCTGGAATGTTGACGTTAACAAGCCCCAACTTGTTAAAGGTATGGCAG  
GAGGAAAATATCGTTCGTTTTTAATCCATGTCAAGGCAGTGAATGAAAGAGGAACAGAAGAGATTTGTAA  
TGGTGGTATGCGTCCTGTAGTAAGGCTTCCATCCCTAAAAACACCAGAGTAACAAGGGTTATTCACCTGCT  
TCACTTTTGGCTAAAGTTGCAGCAGGCAAGGAAAAATCATCTAATGTTAAGAATGAAAATACAAGTGGCA  
CCCGTAAATCTGAAAACCTCCGGGGCTGTGATTTACTTCAAGAGGTCTCAGTCACCATTGGAAGATTTAA  
GAAAACCTCAATTTCTAAGGAAAGAGTGCAACGATGTGCCATGTTACAGTTTTCAGAATTCATGAGAAG  
CTTCTTAATACTCTTTCAGAAAAACAGATGATGGCCAGATCACAGAACATGCCCAGAGCCTTGTTGG  
ATACTCTCTGTTGGTTAGCTGGAGTTCATTCAAATGGACCCGGAAGCTCAAAGGAAGGAAATGAGAACCT  
ACTTTCAAAAACACGAAAATTTCTGTCAGACATCGTACGTGTTTGCTTCTTGAGGCAGGACGAAGTATA  
GCCATAAGTGTGCCGATTTCTAGCCTTGTCATTAGTAATGGCAAATGTGACCCATGTCAACCAGCAT  
TTGGACCTGTTCTGTTGAAGGCTTTACTTGATAATATGTCATTTTTACCTGCAGCAACAACCTGGTGGTTC  
TGTCTATTGGTATTTTGTCTTACTGAATTATGTGAAAGATGAAGATCTGGCTGGATGCAGTACAGCTTGT  
GCATCTTTGCTTACTGCAGTGTCCAGACAGTTACAGGACAGGCTAACACCAATGGAGGCTTTACTTCAGA  
CAAGATATGGATTATATAGCTCACCATTTGATCCAGTCCTCTTTGATTTGGAGATGAGTGGCTCTTCTTG  
TAAAAATGTTTATAACAGCAGCATTGGTGTCCAGTCAGATGAAATTGATTTATCAGATGTCCTTTCAGGA  
AATGGAAAGGTCAGTAGTTGCACAGCTGCTGAGGGTAGTTTCACATCTCTCACTGGACTTTTGGAAGTTG  
AACCTCTGCACTTTACTTGTGTGTCAACTAGTGATGGAACCAGAATAGAAAGGGATGATGCAATGAGTTC  
CTTCGGGGTTACTCCTGCAGTAGGTGGACTATCATCTGGGACAGTTGGGGAAGCCTCGACAGCCCTGAGT  
TCAGCAGCCCAGGTAGCTTTGCAGTCTCTCTCATGCAATGGCTTCAGCCGAGCAACAGCTACAGGTGC  
TGCAAGAGAAACAGCAGCAGCTTTGAAGCTTCAGCAACAGAAAGCAAAGCTGGAAGCCAAGTTACATCA  
GACAACAGCTGCAGCAGCTGCAGCAGCATCAGCAGTAGGTCCTGTTCACAACTCTGTGCCTTCCAACCCA  
GTGGCTGCCCCTGGATTCTTCATTCATCCATCTGATGTTATTCCACCCACTCCAAAAACAACACCTCTTT  
TTATGACTCCACCACTCACTCCACCAATGAAGCAGTTTCCGTTGTGATTAATGCCGAACCTGCACAGCT  
TTTCCCAGGCTCAGTCATTGATCCCCCAGCAGTCAATCTTGCTGCACATAACAAAAATTCCAACAAGTCC

AGAATGAATCCACTTGGTTCTGGTCTAGCCCTTGCAATTTCTCATGCTTCACATTTTCTTCAACCTCCGC  
CTCACCAGTCCATTATTATAGAGCGAATGCATTGAGGAGCAAGAAGATTTGTGACCTTGGATTTTGGGAG  
GCCTATATTGTTGACTGATGTATTGATTCCCACTTGTGGAGACTTGGCCTCTTGTCAATTGACATTTGG  
ACATTAGGAGAAGAGGTGGATGGAAGGCGGTTGGTAGTGGCAACTGATATAAGCACTCATTCACTAATTC  
TTCATGACTTAATACCACCTCCCGTGTGCAGATTCATGAAGATCACTGTTATTGGACGTTACGGGAGTAC  
AAATGCCAGAGCCAAAATCCCATTAGGATTTTACTATGGTCATACCTACATCTTGCCTTGGGAAAGTGAA  
CTGAAGTTAATGCATGATCCTCTAAAGGGAGAGGGAGAATCTGCAAACCAGCCAGAAATTGACCAGCATT  
TAGCAATGATGGTTGCTTTCAGGAGGATATACAGTGCAGGTATAACTTGGCTTGTATCGTCTGGAAAC  
CCTTTTGCAAAGTATTGATCTTCCTCTCTAAACAGTGCTAACAATGCACAGTACTTTTTACGAAAACCA  
GATAAGGCAGTTGAGGAAGACAGTAGGGTTTTTCTGCTTATCAAGATTGTATTGAGTACAGCTTCAAC  
TAAATTTGGCTCATAATGCAGTGCAGAGGCTCAAAGTGGCGCTAGGTGCAAGCCGGAAGATGTTGAGTGA  
AACATCAAATCCAGAAGATTTAATTCAGACATCTCCACAGAGCAGTTACGTACTATCATCAGATATTTA  
CTGGACACTTTGCTCAGCCTGCTTCATGCTTCTAATGGACACTCTGTTCTGCAGTTTTGCAGAGCACAT  
TTCATGCCCAGGCCTGTGAAGAGCTCTTTAAACACTTGTGCATCAGTGGAACCCCAAAGATACGGTTACA  
TACTGGTCTTCTTCTGTTCAACTGTGTGGTGGTGAAAGGTGGTGGGGTCAATTTCTTCTAATGTCCTT  
CAGGAATTGTACAATTCGGAACAGCTTCTCATCTTTCCACAGGATAGGGTCTTCATGTTACTTTCTGCA  
TTGGTCAAAGATCACTTAGTAATAGTGGAGTATTAGAAAGCTTACTTAATCTCTTGGATAATTTATTGTC  
ACCTCTTCAGCCACAGTTACCCATGCATAGGAGGACAGAAGGAGTACTAGATATTCCCATGATCAGTTGG  
GTTGTTATGCTGGTGTCCAGGTTGCTGGATTATGTGGCAACTGTTGAAGATGAAGCAGCAGCTGCAAAGA  
AACCTTTGAATGGTAATCAGTGGAGTTTTATTAACAATAATCTACACACTCAGAGCTTAAATAGATCTTC  
TAAAGGCAGCAGTAGCCTTGATAGATTATATTCCAGAAAAATCAGAAAGCAGCTTGTTTCATCATAAACAG  
CACTTAACCTACTAAAAGCAAAGCAGAAGGCATTGGTAGAACAGATGGAAAAAGAAAAAATACAAAGTA  
ACAAAGGATCATCATATAAACTCCTGGTAGAACAAGCAAACTAAAGCAGGCCACTTCAAAGCACTTTAA  
GGATTTAATTCGTTTACGTCGGACAGCAGAATGGTCCCCTTAATTTAGACACAGAAGTTACAACAGCA  
AAAGAAAGTCCTGAGATAGAACCACTTCCATTTACTCTGGCCCATGAGCGTTGTATCTCAGTAGTCCAGA

AACTTGTTCTGTTTCTTCTCCATGGACTTTACATGTCATGCAGATCTCTTATTGTTTGTGTAAGGT  
TCTTGACGCATTGCAAATGCCACGAGGCCAACTATTCATCTGTGTGAGATTGTGAACGAACCCAGCTG  
GAAAGACTGCTGTTACTTTTGGTTGGAAGTGAAGTCAATAGAGGAGATATATCTTGGGGTGGTGCTTGGG  
CTCAGTATTCCTTAACTTGCATGCTACAAGATATTTTAGCAGGAGAATTACTGGCTCCAGTAGCCGCAGA  
AGCCATGGAGGAAGGAACAGTGGGTGATGATGTAGGTGCGACAGCTGGTGACTCTGATGACTCCCTTCAA  
CAGTCCTCAGTTCAGTTGCTGGAAACTATAGATGAACCTTTGACACATGACATAACAGGTGCACCTCCTC  
TGTCCTCTTTGGAAAAAGATAAAGAAATTGACCTTGAGTTACTTCAGGATCTAATGGAAGTTGACATTGA  
TCCTTTAGATATTGATTTGGAAAAGGACCCTCTTGACGCCAAGGTTTTTAAGCCAATAAGCAGTACATGG  
TATGATTATTGGGGTGCTGATTATGGGACCTACAATTACAACCCTTACATTGGAGGTCTGGGAATTCCTG  
TAGCAAAGCCACCAGCAAACACGGAGAAGAACGGATCACAGACAGTTAGCGTTTCAGTCTCTCAGGCCCT  
GGATGCTCGCCTAGAAGTTGGACTTGAACAGCAAGCAGAACTGATGTTGAAAATGATGTCTACTCTGGAG  
GCAGATTCCATTTTACAGGCATTAACAAATACATCTCCTACATTATCACAGTCTCCCACTGGAACAGATG  
ATCACTTCTAGGGGGTTTACAAGCAGCAAACCAACCAGCCAGCTTATTATACAGTTATCATCTGTCCC  
AATGTTAAATGTTTGTTCACAACTTTTTTCCATGCTTCAAGTCCATCATGTTTCAGTTGGAGTCACTT  
CTCCAATTGTGGCTCACACTGAGCCTGAATTCTAGTTCAACTGGAAACAAAGAAAATGGAGCAGACATAT  
TTTTATATAATGCTAATAGGATACCTGTTATTTCAATAATCAAGCATCAATAACTAGCTTTCTCACAGT  
GTTAGCTTGGTATCCAATACTTTGCTCCGGACATGGTGCCTTGTGCTTCATAGCCTAACACTCATGACA  
AACATGCAGCTTAATTCTGGTTCAGCAGTGCCATTGGAAGTCAAGGAGAGTACTGCTCATTGTTGGTTT  
CAGATCCAAACCTAATTCATGTATTAGTGAAATTTCTTCTGGCACCAGTCCACATGGAACAAATCAACA  
CAGTCCACAGGTTGGTCTACAGCTACACAAGCTATGCAAGAATTTCTTACTCGATTACAAGTGCATCTT  
TCTTCAACATGTCCTCAGATATTCAGTGAATTTTGTCTCAAGCTAATTCATATACTTTCAACTGAAAGGG  
GTGCTTTCAGACAGGCCAAGGACCTCTCGATGCCCAAGTGAAGCTCTTAGAATTCCTGAGCAGAA  
TTTTGAAGTCGTTTCAGTTAGTACTATTTCTGCCGTGATAGAATCGGTTACATTTTGTGACCACTAT  
ATCACTTGCTCAGACAAAGTAATGTCAAGAAGTGGATCAGATAGCTCCGTGGGTGCTCGAGCATGCTTTG  
GGGGACTCTTTGCCAATCTTATTCGTCCGGGTGATGCAAAAGCAGTTTGTGGCGAAATGACAAGAGATCA

ACTCATGTTTGATTTGTTAAACTTGTTAACATTTTAGTGCAGCTGCCTCTTTCAGGCAATAGGGAATAC  
AGTGCAAGAGTGTCTGTGACCACAAATACAACAGATAGTGTTCAGATGAAGAAAAAGTCTCAGGAGGCA  
AAGATGGCAATGGAAGCAGTACCAGTGTTCAAGGATCGCCTGCATATGTTGCTGACTTAGTCTTAGCCAA  
CCAACAAATTATGAGCCAGATTTTGTCTGCTCTGGGCCTGTGTAATAGCAGTGCCATGGCAATGATAATT  
GGAGCAAGTGGATTACATCTCACTAAACATGAAAACCTTTCATGGTGGGTGGATGCCATATCAGTTGGGG  
ATGGATTATTTACCATACTGACAACCCTTAGTAAAAAAGCTTCTACAGTCCACATGATGCTGCAGCCAAT  
TTAACATACATGGCCTGTGGATATATGGGCAGACAAGGCTCTCTTGCTACTTGCCAGTTATCTGAGCCA  
TTATTGTGGTTCATTTTGAGAGTATTGGATACTAGTGATGCCTTGAAAGCATTTTCATGATATGGGTGGTG  
TTCAGCTCATATGCAATAATATGGTTACTAGTACAAGGGCTATTGTGAACACTGCAAGAAGTATGGTATC  
AACTATTATGAAATTTCTTGACTCTGGTCCAAATAAAGCTGTTGACAGCACATTGAAAACAAGAATACTA  
GCTTCTGAGCCTGACAATGCTGAAGGGATTATAACTTTGCACCCCTCGGTACAATCACATCTAGCAGTC  
CTACTGCCCAACCAGCTGAAGTGCTATTGCAGGCCACACCTCCTCACAGAAGAGCTCGCTCTGCTGCTTG  
GTCCTACATCTTTCTCCAGAGGAGGCTTGGTGTGACCTTACCATTACCTTCCTGCAGCAGTGCTGCTT  
AAGGAGATACATATCCAGCCTCATCTTGCATCTCTTGCAACCTGCCCTTCCTCAGTGTCTGTTGAAGTAA  
GTGCAGATGGGGTAAATATGCTACCTTTGTCCACTCCTGTTGTCACAAGTGGCCTCACCTACATAAAAAAT  
TCAGCTTGTAAGCCGAAGTAGCTTCTGCTGTCTGCCTTAGACTACATCGTCCACGGGATGCCAGCACA  
TTAGGCCTTTCACAAATTAAATTATTGGGGCTCACTGCTTTTGGTACCACCTTCTGCAACAGTTAATA  
ATCCATTCCTTCCATCTGAAGATCAGGTATCCAAAACAAGTATTGGATGGTTACGGTTATTACATCATTG  
CCTTACTCACATAAGTGATCTAGAAGGAATGATGGCAAGTGCAGCTGCACCTACTGCTAATCTGCTGCAG  
ACTTGTGCGGCCTTATTGATGTCACCTTACTGTGGAATGCATTACCCAACATCGAGGTTGTGCTTGTA  
AGATAGGACTGCAGTCTACTAGAATTGGCCTGAAGCTCATAGACATTCTCCTGAGAAATTGTGCAGCATC  
AGGCAGTGATCCTACAGATTTGAATAGTCCTTTACTTTTTGGAAGACTAAATGGACTCTCTTCTGACTCT  
ACGATAGATATTCTTTACCAGCTTGGAACAACTCAGGATCCTGGTACAAAAGACAGAATTCAGGCCTTGT  
TAAAATGGGTTAGTGATTCTGCAAGAGTGGCTGCTATGAAGAGAAGTGGCAGGATGAACTACATGTGTCC  
TAACTCCTCAACAGTAGAGTATGGTCTTCTGATGCCATCTCCTTCTCATTTGCACTGTGTAGCAGCCATT

CTGTGGCATAGTTATGAGCTGCTTGTAGAATATGACTTACCAGCACTCCTGGACCAAGAGCTCTTTGAGT  
TACTTTTTAATTGGTCCATGTCTCTTCCCTGCAATATGGTTTTGAAGAAAGCTGTTGACAGTCTACTTTG  
CTCAATGTGTCACGTACACCCAACTATTTTTCTTTGCTCATGGGCTGGATGGGAATTACCCCTCCTCCA  
GTGCAATGTCATCATAGACTGTCCATGACAGATGATAGCAAAAAGCAGGATCTTAGTTCATCTTTAACAG  
ATGACTCTAAAAATGCACAAGCACCTCTCGCATTAACTGAATCACATTTGGCTACCCTTGCTTCCTCTTC  
TCAATCTCCTGAAGCTATTAACAATTACTAGACTCAGGTTTGCCTTCTTCTTGTGAGGAGTCTGGCT  
AGTTTCTGCTTTAGCCACATTTCTAGCTCAGAAAGCATTGCCAGTCAATAGATATTTCCAGGACAAAC  
TCAGGCGCCATCATGTCCACAACAATGTAATAAGATGCCTATCACAGCCGACCTAGTTGCTCCTATTCT  
TAGGTTTTTGACAGAAGTTGGCAATAGCCATATTATGAAAGATTGGCTTGGTGGTTCTGAAGTCAATCCA  
CTATGGACAGCACTTCTGTTTTATTGTGTCACTCTGGGTCCACTTCTGGAAGCCATAATTTAGGTGCAC  
AACAGACCAGTGCAAGATCAGCTTCTCTTTCTTCAGCTGCTACAACAGGACTGACTACTCAACAGCGCAC  
AGCAATTGAGAATGCAACTGTTGCGTTCTTTCTACAGTGCAATTCATGCCATCCTAATAATCAAAAGCTG  
ATGGCACAGGTTCTTTGTGAATTTTACAGACATCTCCTCAAAGAGGGAACCTTCCAACATCTGGGAACA  
TTTCAGGGTTTATACGAAGATTATTTTACAGTTGATGCTGGAAGATGAGAAAGTGACAATGTTTCTTCA  
GTCTCCATGTCCACTGTACAAAGGTAGAATTAATGCTACTAGCCACGTATCCAGCATCCAATGTATGGA  
GCAGGCCACAAATTCCGTACTCTTCATTTGCCAGTCTCAACAACATTATCAGATGTTCTTGACAGAGTGT  
CAGATACTCCAAGTATCACAGCTAAATTAATTAGTGAACAAAAAGATGACAAAGAAAAAGAAAAACCATGA  
AGAGAAAGAAAAAGTTAAAGCGGAAAATGGATTTCAAGACAATTACAGTGTTGTTGTTGCCTCTGGGCTG  
AAGTCTCAATCTAAACGTGCTGTGTGTCAGCTACACCACCTCGCCACCATCCAGGAGGGGGAGGACAATAC  
CTGATAAAATAGGAAGTACTTCAGGAGCAGAGGCTGCCAACAAAATAATTACTGTCCCAGTGTTTCACCT  
GTTTCACAACTCTTGGCAGGCCAGCCATTGCCAGCTGAAATGACACTTGCCAGCTTTTAACTCTCCTA  
TATGACCGAAAACCTCCTCAGGGTTACCGCTCAATAGATCTGACTGTTAAATTGGGATCAAGAGTTATAA  
CAGACCCCAGTCTATCAAAAACAGATTCTTATAAAAGACTACACCCTGAAAAAGATCATGGAGACTTACT  
TGCTAGCTGTCCAGAAGATGAGGCTCTCACTCCAGGTGATGAATGCATGGATGGGATACTGGATGAATCT  
TTGCTTGAAACCTGTCCAATTCAGTCACCATTACAAGTTTTTGCAGGAATGGGTGGACTGGCTCTTATTG

CTGAAAGACTACCCATGCTATATCCAGAAGTAATTCAACAGGTGAGTGCTCCAGTTGTAACATCTACCAC  
TCAGGAAAAGCCGAAGGATAGCGATCAGTTTGAATGGGTGACCATTGAACAGTCAGGGGAGTTAGTTTAT  
GAAGCACCAGAAACTGTTGCGGCTGAACCTCCACCTATCAAGTCAGCAGTACAGACCATGTCTCCCATAC  
CTGCCCATTCTTTGGCTGCTTTTGGATTATTTCTTCGTCTTCCGGGCTATGCGGAAGTGCTACTGAAAGA  
GAGAAAACATGCCAGTGCCTTCTTCGATTGGTATTGGGAGTGACAGATGATGGAGAAGGAAGTCATATT  
CTTCAATCTCCATCAGCCAATGTGCTTCCAACCCTTCCTTTCCACGTCCTTCGTAGCTTGTTTAGCACTA  
CACCTTTGACAACTGATGATGGTGTACTTCTAAGGCGGATGGCATTGGAAATTGGAGCCTTACACCTCAT  
TCTTGTCTGTCTCTGCTTTGAGCCACCATTCCCCACGAGTTCCAAACTCTAGCGTGAATCAAAGTGAAG  
CCACAGGTGTCAAGCTCTCATAACCCTACATCAACAGAAGAACAACAGTTATATTGGGCCAAAGGGACTG  
GCTTTGGAACAGGCTCTACAGCTTCTGGGTGGGATGTGGAACAAGCCTTAAGCAAGGCTGGAAGA  
GGAACATGTTACCTGCCTTCTGCAGGTTCTTGCCAGTTACATAAATCCCGTCAGTAGTGCGGTAAATGGA  
GAAGCTCAGTCATCTCATGAGACTAGAGGGCAGAACAGTAATGCCCTTCCTTCTGTACTTCTCGAGCTTC  
TCAGTCAGTCCTGCCTCATCCCAGCCATGTCATCTTATCTACGAAATGATTCAGTTCTGGACATGGCAAG  
ACATGTGCCACTCTATCGGGCACTGCTGGAATTGCTTCGGGCCATTGCTTCTTGTGCTGCCATGGTGCCC  
CTATTGTTGCCCCTTTCTACAGAGAACGGTGAAGAGGAAGAAGAAGCAGTCAGAATGTCAAACCTTCTGTTG  
GTACATTGTTAGCCAAAATGAAGACCTGTGTTGATACCTATACCAACCGTTTAAGATCTAAAAGGGAAAA  
TGTTAAACAGGAGTAAACCAGATGCGTCTGATCAAGAACCAGAAGGACTTACTCTTTTGGTACCAGAC  
ATCCAAAAGACTGCTGAGATAGTTTATGCAGCCACCACCAGTTTGCGGCAAGCAAATCAGGAAAAAAAAAC  
TGGGTGAATACTCCAAGAAGGCGGCTATGAAACCCAAACCTTTGTCAGTATTAAAGTCACTTGAAGAAAA  
ATATGTGGCTGTTATGAAGAAATTACAGTTTGATACGTTTGAAATGGTTTCTGAAGATGAAGATGGGAAA  
TTGGGATTTAAAGTAAATTACCACTACATGTCTCAGGTGAAAAATGCTAATGATGCGAACAGTGCTGCCA  
GAGCTCGCCGCTTGCCAGGAAGCTGTGACGCTTCAACCTCACTGCCTCTGTCTTCATCCTCTAGTGT  
GTTTGTACGCTGTGATGAGGAGCGACTTGATATCATGAAGGTTCTAATAACTGGTCCAGCGGACACCCCT  
TATGCAAATGGCTGCTTTGAGTTTGATGTGTATTTTCTCAAGATTATCCCAGTTCACCCCTCTTGTA  
ATCTAGAGACAACCTGGTGGTCATAGCGTGCGATTCAATCCAAACCTTTATAATGATGGCAAGGTTTGTTT

AAGCATCTTAAACACGTGGCATGGAAGACCAGAAGAGAAGTGGAATCCTCAGACCTCAAGCTTTTTGCAA  
GTGTTGGTGTCTGTCCAGTCCCTTATATTAGTAGCTGAGCCTTATTTTAATGAACCGGGATATGAACGGT  
CTAGAGGCACTCCCAGTGGCACACAGAGTTCTCGAGAATATGATGGAAACATTTCGACAAGCAACAGTTAA  
GTGGGCAATGCTAGAACAAATCAGAAACCCTTCACCATGTTTTAAAGAGGTAATACACAAACATTTTAC  
TTGAAAAGAGTTGAGATAATGGCCCAATGTGAGGAGTGGATTGCGGATATCCAGCAGTACAGCAGTGATA  
AGCGGGTAGGCAGGACTATGTCTCACCATGCAGCAGCTCTCAAGCGTCACACTGCTCAGCTCCGCGAAGA  
GTTGCTGAAACTCCCTGCCCTGAAGGCTTGGATCCTGACACTGACGATGCCCCAGAGGTGTGCAGAGCC  
ACAACAGGTGCTGAGGAGACTCTAATGCATGATCAGGTTAAACCCAGCAGCAGCAAAGAACTCCCCAGTG  
ACTCCAGTTATGA

>|cl|NM\_013979.3\_cds\_NP\_053582.2\_1 [gene=BNIP1] [db\_xref=CCDS:CCDS4385.1] [protein=vesicle  
transport protein SEC20 isoform BNIP1-b] [protein\_id=NP\_053582.2] [location=16..831] [gbkey=CDS]

ATGGCGGCTCCCCAAGACGTCCACGTCCGGATCTGTAACCAAGAGATTGTCAAATTTGACCTGGAGGTGA  
AGGCGCTTATTCAGGATATCCGTGATTGTTGAGGACCCTTAAGTGCTCTTACTGAACTGAATACTAAAGT  
AAAAGAGAAATTTCAACAGTTGCGTCACAGAATACAGCCAGTTCTCTATCAAAGGGCATTATTTGGACT  
GCTTCACATTTTTTTTTTAAGCTAACTTATTCCTGACAGACTTTTCTTCAACTCAGCATGACTTCAACT  
CTCCAATAACCTGTTACCTTCAGTGACCTGGAGCAGTTGGCTAAAGAGCAAGACAAAGAATCAGAGAA  
ACAATTCTACTCCAGGAAGTGGAGAATCACAAAAGCAGATGCTCAGCAATCAGGCCTCATGGAGGAAA  
GCTAATCTCACCTGCAAAATTGCAATCGACAATCTAGAGAAAGCAGAACTTCTCAGGGAGGAGATCTCT  
TAAGGCAAAGGAAAACCAACAAAGAGAGCCTGGCCAGACATCCAGTACCATCACTGAGAGCCTCATGGG  
GATCAGCAGGATGATGGCCAGCAGGTCCAGCAGAGCGAGGAGGCCATGCAGTCTCTAGTCACTTCTTCA  
CGAACGATCCTGGATGCAAAATGAAGAATTTAAGTCCATGTCGGGCACCATCCAGCTGGGCCGGAAGCTTA  
TCACAAAATACAATCGCCGGGAGCTGACGGACAAGCTTCTCATCTTCTTGCGCTAGCCCTGTTTCTTGC

TACGGTCCTCTATATTGTGAAAAAGCGGCTCTTCCATTTTGTGA

>|cl|NM\_004052.4\_cds\_NP\_004043.4\_1 [gene=BNIP3] [db\_xref=CCDS:CCDS7663.2]  
[protein=BCL2/adenovirus E1B 19 kDa protein-interacting protein 3] [protein\_id=NP\_004043.4]  
[location=118..702] [gbkey=CDS]

ATGTCGCAGAACGGAGCGCCCGGGATGCAGGAGGAGAGCCTGCAGGGCTCCTGGGTAGAACTGCACTTCA  
GCAATAATGGGAACGGGGGCAGCGTTCCAGCCTCGGTTTCTATTTATAATGGAGACATGGAAAAAATACT  
GCTGGACGCACAGCATGAGTCTGGACGGAGTAGCTCCAAGAGCTCTCACTGTGACAGCCACCTCGCTCG  
CAGACACCACAAGATACCAACAGAGCTTCTGAAACAGATACCCATAGCATTGGAGAGAAAAACAGCTCAC  
AGTCTGAGGAAGATGATATTGAAAGAAGGAAAGAAGTTGAAAGCATCTTGAAGAAAAACTCAGATTGGAT  
ATGGGATTGGTCAAGTCGGCCGGAAAATATTCCCCCAAGGAGTTCCTCTTTAAACACCCGAAGCGCACG  
GCCACCCTCAGCATGAGGAACACGAGCGTCATGAAGAAAGGGGGCATATTCTCTGCAGAATTTCTGAAAG  
TTTTCTTCCATCTCTGCTGCTCTCTCATTTGCTGGCCATCGGATTGGGGATCTATATTGGAAGGCGTCT  
GACAACCTCCACCAGCACCTTTTGA

>|cl|NM\_004331.3\_cds\_NP\_004322.1\_1 [gene=BNIP3L] [db\_xref=CCDS:CCDS6050.1]  
[protein=BCL2/adenovirus E1B 19 kDa protein-interacting protein 3-like isoform 1]  
[protein\_id=NP\_004322.1] [location=78..737] [gbkey=CDS]

ATGTCGTCCCACCTAGTCGAGCCGCCGCCGCCCTGCACAACAACAACAACACTGCGAGGAAAATGAGC  
AGTCTCTGCCCCCGCCGGCCGGCCTCAACAGTTCCTGGGTGGAGCTACCCATGAACAGCAGCAATGGCAA  
TGATAATGGCAATGGGAAAAATGGGGGGCTGGAACACGTACCATCCTCATCCTCCATCCACAATGGAGAC

ATGGAGAAGATTCTTTTGGATGCACAACATGAATCAGGACAGAGTAGTTCCAGAGGCAGTTCTCACTGTG  
ACAGCCCTTCGCCACAAGAAGATGGGCAGATCATGTTTGATGTGGAAATGCACACCAGCAGGGACCATAG  
CTCTCAGTCAGAAGAAGAAGTTGTAGAAGGAGAGAAGGAAGTCGAGGCTTTGAAGAAAAGTGCGGACTGG  
GTATCAGACTGGTCCAGTAGACCCGAAAACATTCCACCCAAGGAGTTCCACTTCAGACACCCTAAACGTT  
CTGTGTCTTTAAGCATGAGGAAAAGTGGAGCCATGAAGAAAGGGGGTATTTTCTCCGCAGAATTTCTGAA  
GGTGTTCAATCCATCTCTCTTCTTTCTCATGTTTTGGCTTTGGGGCTAGGCATCTATATTGGAAAGCGA  
CTGAGCACACCCTCTGCCAGCACCTACTGA

>|cl|NM\_005831.5\_cds\_NP\_005822.1\_1 [gene=CALCOCO2] [db\_xref=CCDS:CCDS11538.1]

[protein=calcium-binding and coiled-coil domain-containing protein 2 isoform 3]

[protein\_id=NP\_005822.1] [location=55..1395] [gbkey=CDS]

ATGGAGGAGACCATCAAAGATCCCCCACATCAGCTGTCTTGCTGGATCACTGTCATTTCTCTCAGGTCA  
TCTTTAACAGTGTGGAGAAGTTCTACATCCCTGGAGGGGACGTCACATGTCATTATACCTTCACCCAGCA  
TTTCATCCCTCGTCGAAAGGATTGGATTGGCATCTTTAGAGTGGGGTGGAAGACAACCCGTGAGTATTAC  
ACCTTCATGTGGGTACTTTGCCATTGACCTAAACAACAAATCAGCTAAACAGCAGGAAGTCCAATTCA  
AAGCTTACTACCTGCCCAAGGATGATGAGTATTACAGTTCTGCTATGTGGATGAGGATGGTGTGGTCCG  
GGGAGCAAGTATTCTTTCCAATCCGTCCAGAAAATGAGGAAGACATCCTGGTTGTTACCACTCAGGGA  
GAGGTGGAAGAGATTGAGCAGCACAACAAGGAGCTTTGCAAAGAAAACCAGGAGCTGAAGGACAGCTGTA  
TCAGCCTCCAGAAGCAGAACTCAGACATGCAGGCTGAGCTCCAAAAGAAGCAGGAGGAGCTAGAAACCCT  
ACAGAGCATCAATAAGAAGTTGGAAGTGAAAGTGAAGAACAGAAGGACTATTGGGAGACAGAGCTGCTT  
CAACTGAAAGAACAAAACCAGAAGATGTCCTCAGAAAATGAGAAGATGGGAATCAGAGTGGATCAGCTTC  
AGGCCCAGCTGTCAACTCAAGAGAAAGAAATGGAGAAGCTTGTTTCAGGGAGATCAAGATAAGACAGAGCA  
GTTAGAGCAGCTGAAAAAGGAAAATGACCACCTTTTCTCAGTTTAACTGAACAGAGGAAGGACCAGAAG

AAGCTCGAGCAGACAGTGGAGCAAATGAAGCAGAATGAACTACTGCAATGAAGAAACAACAGGAATTAA  
TGGATGAAAACCTTTGACCTGTCAAAAAGACTGAGTGAGAACGAAATTATATGTAATGCTCTGCAGAGACA  
GAAAGAGAGATTGGAAGGAGAAAATGATCTTTTGAAGAGGGAGAACAGCAGATTGCTCAGTTACATGGGT  
CTGGATTTTAATTCTTTGCCGTATCAAGTACCTACTTCAGATGAAGGAGGCGCAAGACAAAATCCAGGAC  
TTGCCTATGGAAACCCATATTCTGGTATCCAAGAAAGTTCTTCCCCAGCCCGCTCTCCATCAAGAAATG  
CCCTATCTGCAAAGCAGATGATATTTGTGATCACACCTTGGAGCAACAGCAGATGCAGCCCCTTTGTTTC  
AATTGTCCAATTTGTGACAAGATCTTCCCAGCTACAGAGAAGCAGATCTTTGAAGACCACGTGTTCTGCC  
ACTCTCTCTGA

>|cl| NM\_172226.3\_cds\_NP\_757380.1\_1 [gene=CAMKK2] [db\_xref=CCDS:CCDS9218.1]  
[protein=calcium/calmodulin-dependent protein kinase kinase 2 isoform 2] [protein\_id=NP\_757380.1]  
[location=132..1757] [gbkey=CDS]

ATGTCATCATGTGTCTCTAGCCAGCCCAGCAGCAACCGGGCCGCCCCCAGGATGAGCTGGGGGGCAGGG  
GCAGCAGCAGCAGCGAAAGCCAGAAGCCCTGTGAGGCCCTGCGGGGCCTCTCATCCTTGAGCATCCACCT  
GGGCATGGAGTCCTTCATTGTGGTCACCGAGTGTGAGCCGGGCTGTGCTGTGGACCTCGGCTTGGCGCGG  
GACCGGCCCCCTGGAGGCCGATGGCCAAGAGGTCCCCCTTGACACCTCCGGGTCCCAGGCCCGGCCCCACC  
TCTCCGGTCGCAAGCTGTCTCTGCAAGAGCGGTCCCAGGGTGGGCTGGCAGCCGGTGGCAGCCTGGACAT  
GAACGGACGCTGCATCTGCCCCGTCCCTGCCCTACTCACCCGTCAGCTCCCCGCAGTCCTCGCCTCGGCTG  
CCCCGGCGGCCGACAGTGGAGTCTCACCACGTCTCCATCACGGGTATGCAGGACTGTGTGCAGCTGAATC  
AGTATACCCTGAAGGATGAAATTGAAAGGGCTCCTATGGTGTCGTCGAAGTTGGCCTACAATGAAAATGA  
CAATACCTACTATGCAATGAAGGTGCTGTCCAAAAAGAAGCTGATCCGGCAGGCCGGCTTTCCACGTGCGC  
CCTCCACCCCGAGGCACCCGGCCAGCTCCTGGAGGCTGCATCCAGCCCAGGGGCCCCATTGAGCAGGTGT  
ACCAGGAAATTGCCATCCTCAAGAAGCTGGACCACCCCAATGTGGTGAAGCTGGTGGAGGTCCTGGATGA

CCCCAATGAGGACCATCTGTACATGGTGTTCGAACTGGTCAACCAAGGGCCCGTGATGGAAGTGCCCACC  
CTCAAACCACTCTCTGAAGACCAGGCCCGTTTCTACTTCCAGGATCTGATCAAAGGCATCGAGTACTTAC  
ACTACCAGAAGATCATCCACCGTGACATCAAACCTTCCAACCTCCTGGTCGGAGAAGATGGGCACATCAA  
GATCGCTGACTTTGGTGTGAGCAATGAATTCAAGGGCAGTGACGCGCTCCTCTCCAACACCGTGGGCACG  
CCCGCCTTCATGGCACCCGAGTCGCTCTCTGAGACCCGCAAGATCTTCTCTGGGAAGGCCTTGGATGTTT  
GGGCCATGGGTGTGACACTATACTGCTTTGTCTTTGGCCAGTGCCCATTTCATGGACGAGCGGATCATGTG  
TTTACACAGTAAGATCAAGAGTCAGGCCCTGGAATTTCCAGACCAGCCCGACATAGCTGAGGACTTGAAG  
GACCTGATCACCCGTATGCTGGACAAGAACCCCGAGTCGAGGATCGTGGTGCCGGAATCAAGCTGCACC  
CCTGGGTCACGAGGCATGGGGCGGAGCCGTTGCCGTCGGAGGATGAGAACTGCACGCTGGTCTGAAGTGAC  
TGAAGAGGAGGTGAGAACTCAGTCAAACACATTCCCAGCTTGGCAACCGTGATCCTGGTGAAGACCATG  
ATACGTAAACGCTCCTTTGGGAACCCATTGAGGGCAGCCGGCGGGAGGAACGCTCACTGTCAGCGCCTG  
GAAACTTGCTCACGAAGCAAGGCAGCGAAGACAACCTCCAGGGCACCGACCCGCCCCCGTGGGGGAGGA  
GGAAGTGCTCTTGTGA

>|cl|NM\_001024649.2\_cds\_NP\_001019820.1\_1 [gene=CANX] [db\_xref=CCDS:CCDS4447.1]  
[protein=calnexin isoform d precursor] [protein\_id=NP\_001019820.1] [location=87..1865] [gbkey=CDS]

ATGGAAGGGAAGTGGTTGCTGTGTATGTTACTGGTGCTTGGAAGTGCTATTGTTGAGGCTCATGATGGAC  
ATGATGATGATGTGATTGATATTGAGGATGACCTTGACGATGTCATTGAAGAGGTAGAAGACTCAAAACC  
AGATACCACTGCTCCTCCTTCATCTCCAAGGTTACTTACAAAGCTCCAGTTCCAACAGGGGAAGTATAT  
TTTGCTGATTCTTTTGACAGAGGAACTCTGTCAGGGTGGATTTTATCAAAGCCAAGAAAGACGATACCG  
ATGATGAAATTGCCAAATATGATGGAAAGTGGGAGGTAGAGGAAATGAAGGAGTCAAAGCTTCCAGGTGA  
TAAAGGACTTGTGTTGATGTCTCGGGCCAAGCATCATGCCATCTCTGCTAAACTGAACAAGCCCTTCCTG  
TTTGACACCAAGCCTCTCATTGTTCAAGTATGAGGTTAATTTCCAAAATGGAATAGAATGTGGTGGTGCCT

ATGTGAAACTGCTTTCTAAACACCAGAACTCAACCTGGATCAGTTCCATGACAAGACCCCTTATACGAT  
TATGTTTGGTCCAGATAAATGTGGAGAGGACTATAAACTGCACTTCATCTTCCGACACAAAAACCCAAA  
ACGGGTATCTATGAAGAAAAACATGCTAAGAGGCCAGATGCAGATCTGAAGACCTATTTTACTGATAAGA  
AAACACATCTTTACACACTAATCTTGAATCCAGATAATAGTTTTGAAATACTGGTTGACCAATCTGTGGT  
GAATAGTGGAATCTGCTCAATGACATGACTCCTCCTGTAAATCCTTCACGTGAAATTGAGGACCCAGAA  
GACCGGAAGCCCGAGGATTGGGATGAAAGACCAAAAATCCCAGATCCAGAAGCTGTCAAGCCAGATGACT  
GGGATGAAGATGCCCCTGCTAAGATTCCAGATGAAGAGGCCACAAAACCCGAAGGCTGGTTAGATGATGA  
GCCTGAGTACGTACCTGATCCAGACGCAGAGAAACCTGAGGATTGGGATGAAGACATGGATGGAGAATGG  
GAGGCTCCTCAGATTGCCAACCTAGATGTGAGTCAGCTCCTGGATGTGGTGTCTGGCAGCGACCTGTGA  
TTGACAACCCCAATTATAAAGGCAAATGGAAGCCTCCTATGATTGACAATCCCAGTTACCAGGGAATCTG  
GAAACCCAGGAAAATACCAAATCCAGATTTCTTTGAAGATCTGGAACCTTTCAGAATGACTCCTTTTAGT  
GCTATTGGTTTGGAGCTGTGGTCCATGACCTCTGACATTTTTTTTGACAACTTATCATTGTGCTGATC  
GAAGAATAGTTGATGATTGGGCAATGATGGATGGGGCCTGAAGAAAGCTGCTGATGGGGCTGCTGAGCC  
AGGCGTTGTGGGGCAGATGATCGAGGCAGCTGAAGAGCGCCCGTGGCTGTGGGTAGTCTATATTCTAACT  
GTAGCCCTTCCTGTGTTCTGTTATCCTCTTCTGCTGTTCTGGAAAGAAACAGACCAGTGGTATGGAGT  
ATAAGAAAAGTATGCACCTCAACCGGATGTGAAGGAAGAGGAAGAAGAGAAGGAAGAGGAAAAGGACAA  
GGGAGATGAGGAGGAGGAAGGAGAAGAGAACTTGAAGAGAAACAGAAAAGTGATGCTGAAGAAGATGGT  
GGCACTGTCAGTCAAGAGGAGGAAGACAGAAAACCTAAAGCAGAGGAGGATGAAATTTTGAACAGATCAC  
CAAGAAACAGAAAGCCACGAAGAGAGTGA

>|cl|NM\_001198868.2\_cds\_NP\_001185797.1\_1 [gene=CAPN1] [db\_xref=CCDS:CCDS44644.1]  
[protein=calpain-1 catalytic subunit] [protein\_id=NP\_001185797.1] [location=40..2184] [gbkey=CDS]

ATGTCGGAGGAGATCATCACGCCGGTGTACTGCACTGGGGTGTGAGCCCAAGTGCAGAAGCAGCGGGCCA

GGGAGCTGGGCCTGGGCCGCCATGAGAATGCCATCAAGTACCTGGGCCAGGATTATGAGCAGCTGCGGGT  
GCGATGCCTGCAGAGTGGGACCCTCTTCGTGATGAGGCCTTCCCCCGGTACCCCAGAGCCTGGGTTAC  
AAGGACCTGGGTCCCAATTCTCCAAGACCTATGGCATCAAGTGGAAGCGTCCACGGAAGTCTGTCAA  
ACCCCCAGTTCATTGTGGATGGAGCTACCCGCACAGACATCTGCCAGGGAGCACTGGGGGACTGCTGGCT  
CTTGGCGGCCATCGCTCCCTCACTCTCAACGACACCCTCTGCACCGAGTGGTTCCGCACGGCCAGAGC  
TTCCAGAATGGCTATGCCGGCATCTTCATTTCCAGCTGTGGCAATTTGGGGAGTGGGTGGACGTGGTCG  
TGGATGACCTGCTGCCCATCAAGGACGGGAAGCTAGTGTCGTGCACTCTGCCGAAGGCAACGAGTTCTG  
GAGCGCCCTGCTTGAGAAGGCCTATGCCAAGGTAAATGGCAGCTACGAGGCCCTGTCAGGGGGCAGCACC  
TCAGAGGGCTTTGAGGACTTCACAGGCGGGGTTACCGAGTGGTACGAGTTGCGCAAGGCTCCCAGTGACC  
TCTACCAGATCATCCTCAAGGCGCTGGAGCGGGGCTCCCTGCTGGGCTGCTCCATAGACATCTCCAGCGT  
TCTAGACATGGAGGCCATCACTTTCAAGAAGTTGGTGAAGGGCCATGCCTACTCTGTGACCGGGGCCAAG  
CAGGTGAACTACCGAGGCCAGGTGGTGAGCCTGATCCGGATGCGGAACCCCTGGGGCGAGGTGGAGTGGA  
CGGGAGCCTGGAGCGACAGCTCCTCAGAGTGGAACAACGTGGACCCATATGAACGGGACCAGCTCCGGGT  
CAAGATGGAGGACGGGGAGTTCTGGATGTCATTCCGAGACTTCATGCGGGAGTTCACCCGCCTGGAGATC  
TGCAACCTCACACCCGACGCCCTCAAGAGCCGGACCATCCGCAAATGGAACACCACACTCTACGAAGGCA  
CCTGGCGGCGGGGGAGCACCGCGGGGGGCTGCCGAACTACCCAGCCACCTTCTGGGTGAACCCTCAGTT  
CAAGATCCGGCTGGATGAGACGGATGACCCGGACGACTACGGGGACCGCGAGTCAGGCTGCAGCTTCGTG  
CTCGCCCTTATGCAGAAGCACCGTCGCCGCGAGCGCCGCTTCGGCCGCGACATGGAGACTATTGGCTTCG  
CGGTCTACGAGGTCCCTCCGGAGCTGGTGGGCCAGCCGGCCGTACACTTGAAGCGTGACTTCTCCTGGC  
CAATGCGTCTCGGGCGGCTCAGAGCAGTTCATCAACCTGCGAGAGGTCAGCACCCGCTTCGCCTGCCA  
CCCGGGGAGTATGTGGTGGTGCCCTCCACCTTCGAGCCCAACAAGGAGGGCGACTTCGTGCTGCGCTTCT  
TCTCAGAGAAGAGTGCTGGGACTGTGGAGCTGGATGACCAGATCCAGGCCAATCTCCCCGATGAGCAAGT  
GCTCTCAGAAGAGGAGATTGACGAGAACTTCAAGGCCCTCTTCAGGCAGCTGGCAGGGGAGGACATGGAG  
ATCAGCGTGAAGGAGTTGCGGACAATCTCAATAGGATCATCAGCAAACACAAAGACCTGCGGACCAAGG  
GCTTCAGCCTAGAGTCGTGCCGAGCATGGTGAACCTCATGGATCGTGATGGCAATGGGAAGCTGGGCCT

GGTGGAGTTCAACATCCTGTGGAACCGCATCCGGAATTACCTGTCCATCTCCGGAAGTTTGACCTGGAC  
AAGTCGGGCAGCATGAGTGCCTACGAGATGCGGATGGCCATTGAGTCGGCAGGCTTCAAGCTCAACAAGA  
AGCTGTACGAGCTCATCATACCCGCTACTCGGAGCCCCGACCTGGCGGTGACTTTGACAATTCGTTTG  
CTGCCTGGTGCGGCTAGAGACCATGTTCCGATTTTTCAAACTCTGGACACAGATCTGGATGGAGTTGTG  
ACCTTTGACTTGTTTAAGTGGTTGCAGCTGACCATGTTTGCATGA

>|cl|NM\_023083.4\_cds\_NP\_075571.2\_1 [gene=CAPN10] [db\_xref=CCDS:CCDS42838.1]  
[protein=calpain-10 isoform a] [protein\_id=NP\_075571.2] [location=179..2197] [gbkey=CDS]

ATGCGGGCGGGCCGGGGCGCGACGCCGGCGAGGGAGCTGTTCCGGGACGCCGCTTCCCCGCCGCGGACT  
CCTCGCTCTTCTGCGACTTGTCTACGCCGCTGGCCCAGTTCCGCGAGGACATCACGTGGAGGCGGCCCCA  
GGAGATTTGTGCCACACCCCGGCTGTTTCCAGATGACCCACGGGAAGGGCAGGTGAAGCAGGGGCTGCTG  
GGGGATTGCTGGTTCCTGTGTGCCTGCGCCGCGCTGCAGAAGAGCAGGCACCTCCTGGACCAGGTCATTC  
CTCCGGGACAGCCGAGCTGGGCCGACCAGGAGTACCGGGGCTCCTTACCTGTGCGATTTGGCAGTTTGG  
ACGCTGGGTGGAGGTGACCACAGATGACCGCCTGCCGTGCCTTGCAGGGAGACTCTGTTTCTCCCGCTGC  
CAGAGGGAGGATGTGTTCTGGCTCCCCTTACTGGAAAAGGTCTACGCCAAGGTCCATGGGTCTACGAGC  
ACCTGTGGGCCGGGCAGGTGGCGGATGCCCTGGTGGACCTGACCGGCGGCCTGGCAGAAAGATGGAACCT  
GAAGGGCGTAGCAGGAAGCGGAGGCCAGCAGGACAGGCCAGGCCGCTGGGAGCACAGGACTTGTGCGCAG  
CTGCTCCACCTGAAGGACCAGTGTCTGATCAGCTGCTGCGTGCTCAGCCCCAGAGCAGGTGCCCCGGGAGC  
TGGGGGAGTTCCATGCCTTCATTGTCTCGGACCTGCGGGAGCTCCAGGGTCAGGCGGGCCAGTGCATCCT  
GCTGCTGCGGATCCAGAACCCTGGGGCCGGCGGTGCTGGCAGGGGCTCTGGAGAGAGGGGGGTGAAGGG  
TGGAGCCAGGTAGATGCAGCGGTAGCATCTGAGCTCCTGTCCCAGCTCCAGGAAGGGGAGTTCTGGGTGG  
AGGAGGAGGAGTTCCTCAGGGAGTTTGACGAGCTACCGTTGGCTACCCGGTCACGGAGGCCGGCCACCT  
GCAGAGCCTCTACACAGAGAGGCTGCTCTGCCATACGCGGGCGCTGCCTGGGGCCTGGGTCAAGGGCCAG

TCAGCAGGAGGCTGCCGGAACAACAGCGGCTTTCCAGCAACCCCAAATTCTGGCTGCGGGTCTCAGAAC  
CGAGTGAGGTGTACATTGCCGTCTGCAGAGATCCAGGCTGCACGCGGCGGACTGGGCAGGCCGGGCCCCG  
GGCACTGGTGGGTGACAGTCATACTTCGTGGAGCCCAGCGAGCATCCCGGGCAAGCACTACCAGGCTGTG  
GGTCTGCACCTCTGGAAGGTAGAGAAGCGGCGGGTCAATCTGCCTAGGGTCTGTCCATGCCCCCGTGG  
CTGGCACCGCGTGCCATGCATACGACCGGGAGGTCCACCTGCGTTGTGAGCTCTACCGGGCTACTACCT  
GGCTGTCCCCAGCACCTTCCTGAAGGACGCGCCAGGGGAGTTCCTGCTCCGAGTCTTCTCTACCGGGCGA  
GTCTCCCTTAGCGCCATCAGGGCAGTGGCCAAGAACACCACCCCGGGGCAGCCCTGCCTGCGGGGGAGT  
GGGGGACCGTGACAGCTACGGGGTTCTTGAGAGTCGGCCAGACGGCGGGGGGCAGCAGGAACTTTGCCTC  
ATACCCACCAACCCCTGCTTCCCCTTCTCGGTCCCCGAGGGCCCTGGCCCCGCTGCGTCCGCATCACT  
CTGCATCAGCACTGCCGGCCAGTGACACCGAGTTCCACCCATCGGCTTCCATATCTTCCAGGTCCCAG  
AGGGTGGAAGGAGCCAGGACGCACCCCCACTGCTGCTGCAGGAGCCGCTGCTGAGCTGCGTGCCACATCG  
CTACGCCCAGGAGGTGAGCCGGCTCTGCCTCCTGCCTGCGGGCACCTACAAGGTTGTGCCCTCCACCTAC  
CTGCCGGACACAGAGGGGGCCTTCACAGTGACCATCGCAACCAGGATTGACAGGCCATCCATTACAGCC  
AGGAGATGCTGGGCCAGTTCCTCCAAGAGGTCTCCATCATGGCAGTGATGAAAACCTAA

>|cl|NM\_001748.5\_cds\_NP\_001739.3\_1 [gene=CAPN2] [db\_xref=CCDS:CCDS31035.1] [protein=calpain-  
2 catalytic subunit isoform 1] [protein\_id=NP\_001739.3] [location=103..2205] [gbkey=CDS]

ATGGCGGGCATCGCGCCAAGCTGGCGAAGGACCGGGAGGCGCCGAGGGGCTGGGCTCCACGACAGGG  
CCATCAAGTACCTCAACCAGGACTACGAGGCGCTGCGGAACGAGTGCCTGGAGGCCGGGACGCTCTTCCA  
GGACCCGTCTTCCCGGCCATCCCCTCGGCCCTGGGCTTCAAGGAGTTGGGGCCCTACTCCAGCAAAACC  
CGGGGCATCGAGTGGAAGCGCCCCACGGAGATCTGCGCTGACCCCAGTTTATCATTGGAGGAGCCACCC  
GCACAGACATCTGCCAAGGAGCCCTGGGTGACTGCTGGCTGCTGGCAGCCATTGCCTCCCTCACCTTGAA  
TGAAGAAATCCTGGCTCGAGTCGTCCCCTAAACCAGAGCTTCCAGGAAAATATGCAGGGATCTTTCAC

TTCCAGTTCTGGCAATACGGCGAGTGGGTGGAGGTGGTGGTGGATGACAGGCTGCCCACCAAGGACGGGG  
AGCTGCTCTTTGTGCATTAGCCGAAGGGAGCGAGTTCTGGAGCGCCCTGCTGGAGAAGGCATACGCCAA  
GATCAACGGATGCTATGAAGCGCTATCAGGGGGTGCCACCACTGAGGGCTTCGAAGACTTCACCGGAGGC  
ATTGCTGAGTGGTATGAGTTGAAGAAGCCCCCTCCCAACCTGTTCAAGATCATCCAGAAAGCTCTGCAAA  
AAGGCTCTCTCCTTGGCTGCTCCATCGACATCACCAGCGCCGCGGACTCGGAGGCCATCACGTTTCAGAA  
GCTGGTGAAGGGGCACGCGTACTCGGTACCCGGAGCCGAGGAGGTTGAAAGTAACGGAAGCCTACAGAAA  
CTGATCCGCATCCGAAATCCCTGGGGAGAAGTGGAGTGGACAGGGCGGTGGAATGACAACTGCCCAAGCT  
GGAACACTATAGACCCAGAGGAGAGGGAAAGGCTGACCAGACGGCATGAAGATGGAGAATTCTGGATGTC  
TTTCAGTGACTTCCTGAGGCACTATTCCCGCCTGGAGATCTGTAACCTGACCCAGACACTCTCACCAGC  
GATACCTACAAGAAGTGGAAACTCACCAAATGGATGGGAACTGGAGGCGGGGCTCCACCGCGGGAGGTT  
GCAGGAACTACCCGAACACATTCTGGATGAACCCTCAGTACCTGATCAAGCTGGAGGAGGAGGATGAGGA  
CGAGGAGGATGGGGAGAGCGGCTGCACCTTCTGGTGGGGCTCATTGAGAAGCACCGACGGCGGCAGAGG  
AAGATGGGCGAGGACATGCACACCATCGGCTTTGGCATCTATGAGGTTCCAGAGGAGTTAAGTGGGCAGA  
CCAACATCCACCTCAGCAAAAATTCTTCTGACGAATCGCGCCAGGGAGCGCTCAGACACCTTCATCAA  
CCTCCGGGAGGTGCTCAACCGCTTCAAGCTGCCGCCAGGAGAGTACATTCTCGTGCCTTCCACCTTCGAA  
CCCAACAAGGATGGGGATTTCTGCATCCGGGTCTTTTCTGAAAAGAAAGCTGACTACCAAGCTGTGATG  
ATGAAATCGAGGCCAATCTTGAAGAGTTCGACATCAGCGAGGATGACATTGATGATGGATTCAGGAGACT  
GTTTGCCAGTTGGCAGGAGAGGATGCGGAGATCTCTGCCTTTGAGCTGCAGACCATCCTGAGAAGGGTT  
CTAGCAAAGCGCCAAGATATCAAGTCAGATGGCTTCAGCATCGAGACATGCAAAATTATGGTTGACATGC  
TAGATTCGGACGGGAGTGGCAAGCTGGGGCTGAAGGAGTTCTACATTCTCTGGACGAAGATTCAAAAATA  
CCAAAAAATTTACCGAGAAATCGACGTTGACAGGTCTGGTACCATGAATTCCTATGAAATGCGGAAGGCA  
TTAGAAGAAGCAGGTTTCAAGATGCCCTGTCAACTCCACCAAGTCATCGTTGCTCGGTTTGCAGATGACC  
AGCTCATCATCGATTTTGATAATTTGTTGCGGTGTTTGGTTCGGCTGGAAACGCTATTCAAGATATTTAA  
GCAGCTGGATCCCGAGAATACTGGAACAATAGAGCTCGACCTTATCTCTTGGCTCTGTTTCTCAGTACTT  
TGA

```
>|c|NM_001003962.3_cds_NP_001003962.1_1 [gene=CAPNS1] [db_xref=CCDS:CCDS12489.1]
[protein=calpain small subunit 1 isoform 1] [protein_id=NP_001003962.1] [location=105..911]
[gbkey=CDS]
```

[illegible]

```
>|cl|NM_033292.4_cds_NP_150634.1_1 [gene=CASP1] [db_xref=CCDS:CCDS8330.1] [protein=caspase-1  
isoform alpha precursor] [protein_id=NP_150634.1] [location=32..1246] [gbkey=CDS]
```

ATGGCCGACAAGGTCCTGAAGGAGAAGAGAAAGCTGTTTATCCGTTCCATGGGTGAAGGTACAATAAATG  
GCTTACTGGATGAATTATTACAGACAAGGGTGCTGAACAAGGAAGAGATGGAGAAAGTAAAACGTGAAAA

TGCTACAGTTATGGATAAGACCCGAGCTTTGATTGACTCCGTTATTCCGAAAGGGGCACAGGCATGCCAA  
ATTTGCATCACATACATTTGTGAAGAAGACAGTTACCTGGCAGGGACGCTGGGACTCTCAGCAGATCAAA  
CATCTGGAAATTACCTTAATATGCAAGACTCTCAAGGAGTACTTTCTTCCTTCCAGCTCCTCAGGCAGT  
GCAGGACAACCCAGCTATGCCACATCCTCAGGCTCAGAAGGGAATGTCAAGCTTTGCTCCCTAGAAGAA  
GCTCAAAGGATATGGAAACAAAAGTCGGCAGAGATTTATCCAATAATGGACAAGTCAAGCCGCACACGTC  
TTGCTCTCATTATCTGCAATGAAGAATTTGACAGTATTCCTAGAAGAACTGGAGCTGAGGTTGACATCAC  
AGGCATGACAATGCTGCTACAAAATCTGGGGTACAGCGTAGATGTGAAAAAAATCTCACTGCTTCGGAC  
ATGACTACAGAGCTGGAGGCATTTGCACACCGCCAGAGCACAAAGACCTCTGACAGCACGTTCTGGTGT  
TCATGTCTCATGGTATTCGGGAAGGCATTTGTGGGAAGAAACACTCTGAGCAAGTCCCAGATATACTACA  
ACTCAATGCAATCTTTAACATGTTGAATACCAAGAACTGCCCAAGTTTGAAGGACAAACCGAAGGTGATC  
ATCATCCAGGCCTGCCGTGGTGACAGCCCTGGTGTGGTGTGGTTTAAAGATTCAGTAGGAGTTTCTGGAA  
ACCTATCTTTACCAACTACAGAAGAGTTTGAGGATGATGCTATTAAGAAAGCCCACATAGAGAAGGATTT  
TATCGCTTTCTGCTCTTCCACACCAGATAATGTTTCTTGAGACATCCCACAATGGGCTCTGTTTTTATT  
GGAAGACTCATTGAACATATGCAAGAATATGCCTGTTCTGTGATGTGGAGGAAATTTCCGCAAGGTTCC  
GATTTTCATTTGAGCAGCCAGATGGTAGAGCGCAGATGCCCACTGAAAGAGTGACTTTGACAAGATG  
TTTCTACCTCTTCCCAGGACATTAA

>|cl|NM\_004346.4\_cds\_NP\_004337.2\_1 [gene=CASP3] [db\_xref=CCDS:CCDS3836.1] [protein=caspase-3  
isoform a preproprotein] [protein\_id=NP\_004337.2] [location=236..1069] [gbkey=CDS]

ATGGAGAACACTGAAAACCTCAGTGGATTCAAAATCCATTAATAATTTGGAACCAAAGATCATACATGGAA  
GCGAATCAATGGACTCTGGAATATCCCTGGACAACAGTTATAAAATGGATTATCCTGAGATGGGTTTATG  
TATAATAATTAATAATAAGAATTTTCATAAAAGCACTGGAATGACATCTCGGTCTGGTACAGATGTTCGAT  
GCAGCAAACCTCAGGGAAACATTGAGAACTTGAAATATGAAGTCAGGAATAAAAATGATCTTACACGTG

AAGAAATTGTGGAATTGATGCGTGATGTTTCTAAAGAAGATCACAGCAAAAGGAGCAGTTTTGTTGTGT  
GCTTCTGAGCCATGGTGAAGAAGGAATAATTTTTGGAACAAATGGACCTGTTGACCTGAAAAAATAACA  
AACTTTTTCAGAGGGGATCGTTGTAGAAGTCTAACTGGAAAACCCAACTTTTCATTATTCAGGCCTGCC  
GTGGTACAGAACTGGACTGTGGCATTGAGACAGACAGTGGTGTGATGATGACATGGCGTGTCTATAAAAT  
ACCACTGGAGGCCGACTTCTTGTATGCATACTCCACAGCACCTGGTTATTATTCTTGGCGAAATTCAAAG  
GATGGCTCCTGGTTCATCCAGTCGCTTTGTGCCATGCTGAAACAGTATGCCGACAAGCTTGAATTTATGC  
ACATTCTTACCCGGGTAAACCGAAAGGTGGCAACAGAATTTGAGTCCTTTTCCTTTGACGCTACTTTTCA  
TGCAAAGAAACAGATTCCATGTATTGTTTCCATGCTCACAAAAGAACTCTATTTTTATCACTAA

>|cl|NM\_001225.4\_cds\_NP\_001216.1\_1 [gene=CASP4] [db\_xref=CCDS:CCDS8327.1] [protein=caspase-4  
isoform alpha precursor] [protein\_id=NP\_001216.1] [location=50..1183] [gbkey=CDS]

ATGGCAGAAGGCAACCACAGAAAAAAGCCACTTAAGGTGTTGGAATCCCTGGGCAAAGATTTCTCACTG  
GTGTTTTGGATAACTTGGTGAACAAAATGTACTGAACTGGAAGGAAGAGGAAAAAAGAAATATTACGA  
TGCTAAAACTGAAGACAAAGTTCGGGTCATGGCAGACTCTATGCAAGAGAAGCAACGTATGGCAGGACAA  
ATGCTTCTTCAAACCTTTTTTAACATAGACCAAATATCCCCCAATAAAAAAGCTCATCCGAATATGGAGG  
CTGGACCACCTGAGTCAGGAGAATCTACAGATGCCCTCAAGCTTTGTCCTCATGAAGAATTCCTGAGACT  
ATGTAAAGAAAGAGCTGAAGAGATCTATCCAATAAAGGAGAGAAACAACCGCACACGCCTGGCTCTCATC  
ATATGCAATACAGAGTTTGACCATCTGCCTCCGAGGAATGGAGCTGACTTTGACATCACAGGGATGAAGG  
AGCTACTTGAGGGTCTGGACTATAGTGTAGATGTAGAAGAGAATCTGACAGCCAGGGATATGGAGTCAGC  
GCTGAGGGCATTGCTACCAGACCAGAGCACAAAGTCCTCTGACAGCACATTCTTGGTACTCATGTCTCAT  
GGCATCCTGGAGGGAATCTGCGGAACTGTGCATGATGAGAAAAAACCAGATGTGCTGCTTTATGACACCA  
TCTTCCAGATATTCAACAACCGCAACTGCCTCAGTCTGAAGGACAAACCAAGGTCATCATTGTCCAGGC  
CTGCAGAGGTGCAAACCGTGGGGAACTGTGGGTCAGAGACTCTCCAGCATCCTTGAAGTGGCCTCTTCA

CAGTCATCTGAGAACCTAGAGGAAGATGCTGTTTACAAGACCCACGTGGAGAAGGACTTCATTGCTTTCT  
GCTCTTCAACGCCACACAACGTGTCCTGGAGAGACAGCACAAATGGGCTCTATCTTCATCACACAACTCAT  
CACATGCTTCCAGAAATATTCTTGGTGCTGCCACCTAGAGGAAGTATTTGGAAGGTACAGCAATCATTT  
GAAACTCCAAGGGCCAAAGCTCAAATGCCCACCATAGAACGACTGTCCATGACAAGATATTTCTACCTCT  
TTCCTGGCAATTGA

>|cl|NM\_001228.4\_cds\_NP\_001219.2\_1 [gene=CASP8] [db\_xref=CCDS:CCDS42799.1] [protein=caspase-  
8 isoform 1 precursor] [protein\_id=NP\_001219.2] [location=304..1794] [gbkey=CDS]

ATGGACTTCAGCAGAAATCTTTATGATATTGGGGAACAACCTGGACAGTGAAGATCTGGCCTCCCTCAAGT  
TCCTGAGCCTGGACTACATTCCGCAAAGGAAGCAAGAACCCATCAAGGATGCCTTGATGTTATTCCAGAG  
ACTCCAGGAAAAGAGAATGTTGGAGGAAAGCAATCTGTCCTTCTGAAGGAGCTGCTCTCCGAATTAAT  
AGACTGGATTTGCTGATTACCTACCTAAACACTAGAAAGGAGGAGATGGAAAGGGAACCTCAGACACCAG  
GCAGGGCTCAAATTTCTGCCTACAGGTTCCACTTCTGCCGCATGAGCTGGGCTGAAGCAAACAGCCAGTG  
CCAGACACAGTCTGTACCTTTCTGGCGGAGGGTCGATCATCTATTAATAAGGGTCATGCTCTATCAGATT  
TCAGAAGAAGTGAGCAGATCAGAATTGAGGTCTTTTAAGTTTCTTTTGCAAGAGGAAATCTCCAAATGCA  
AACTGGATGATGACATGAACCTGCTGGATATTTTCATAGAGATGGAGAAGAGGGTCATCCTGGGAGAAGG  
AAAGTTGGACATCCTGAAAAGAGTCTGTGCCCAAATCAACAAGAGCCTGCTGAAGATAATCAACGACTAT  
GAAGAATTCAGCAAAGGGGAGGAGTTGTGTGGGGTAATGACAATCTCGGACTCTCCAAGAGAACAGGATA  
GTGAATCACAGACTTTGGACAAAGTTTACCAAATGAAAAGCAAACCTCGGGGATACTGTCTGATCATCAA  
CAATCACAATTTTGCAAAAGCACGGGAGAAAGTGCCCAAACCTCACAGCATTAGGGACAGGAATGGAACA  
CACTTGGATGCAGGGGCTTTGACCACGACCTTTGAAGAGCTTCATTTTGAGATCAAGCCCCACGATGACT  
GCACAGTAGAGCAAATCTATGAGATTTTGAAAATCTACCAACTCATGGACCACAGTAACATGGACTGCTT  
CATCTGCTGTATCCTCTCCCATGGAGACAAGGGCATCATCTATGGCACTGATGGACAGGAGGCCCCCATC

TATGAGCTGACATCTCAGTTCAGTTCACTGGTTTGAAGTGCCCTTCCCTTGCTGGAAAACCCAAAGTGTTTTTTA  
TTCAGGCTTGTCAGGGGGATAACTACCAGAAAGGTATACCTGTTGAGACTGATTCAGAGGAGCAACCCTA  
TTTAGAAATGGATTTATCATCACCTCAAACGAGATATATCCCGGATGAGGCTGACTTTCTGCTGGGGATG  
GCCACTGTGAATAACTGTGTTTCTACCGAAACCCTGCAGAGGGAACCTGGTACATCCAGTCACTTTGCC  
AGAGCCTGAGAGAGCGATGTCCTCGAGGCGATGATATTCTCACCATCCTGACTGAAGTGAAGTATGAAGT  
AAGCAACAAGGATGACAAGAAAAACATGGGGAAACAGATGCCTCAGCCTACTTTCACACTAAGAAAAAAA  
CTTGTCTTCCCTTCTGATTGA

>|cl|NM\_002982.4\_cds\_NP\_002973.1\_1 [gene=CCL2] [db\_xref=CCDS:CCDS11277.1] [protein=C-C motif  
chemokine 2 precursor] [protein\_id=NP\_002973.1] [location=66..365] [gbkey=CDS]

ATGAAAGTCTCTGCCGCCCTTCTGTGCCTGCTGCTCATAGCAGCCACCTTCATTCCCAAGGGCTCGCTC  
AGCCAGATGCAATCAATGCCCCAGTCACCTGCTGTTATAAATTACCAATAGGAAGATCTCAGTGCAGAG  
GCTCGCGAGCTATAGAAGAATCACCAGCAGCAAGTGTCCCAAAGAAGCTGTGATCTTCAAGACCATTGTG  
GCCAAGGAGATCTGTGCTGACCCCAAGCAGAAGTGGGTTCAGGATTCCATGGACCACCTGGACAAGCAAA  
CCCAAACCTCCGAAGACTTGA

>|cl|NM\_001123041.3\_cds\_NP\_001116513.2\_1 [gene=CCR2] [db\_xref=CCDS:CCDS43078.1] [protein=C-  
C chemokine receptor type 2 isoform A] [protein\_id=NP\_001116513.2] [location=119..1243]  
[gbkey=CDS]

ATGCTGTCCACATCTCGTTCTCGGTTTATCAGAAATACCAACGAGAGCGGTGAAGAAGTCACCACCTTTT  
TTGATTATGATTACGGTGCTCCCTGTCATAAATTTGACGTGAAGCAAATTGGGGCCCAACTCCTGCCTCC

GCTCTACTCGCTGGTGTTTCATCTTTGGTTTTGTGGGCAACATGCTGGTCGTCCTCATCTTAATAAACTGC  
AAAAAGCTGAAGTGCTTGACTGACATTTACCTGCTCAACCTGGCCATCTCTGATCTGCTTTTTCTTATTA  
CTCTCCATTGTGGGCTCACTCTGCTGCAAATGAGTGGGTCTTTGGGAATGCAATGTGCAAATTATTAC  
AGGGCTGTATCACATCGGTTATTTGGCGGAATCTTCTTCATCATCCTCCTGACAATCGATAGATACCTG  
GCTATTGTCCATGCTGTGTTTGCTTTAAAAGCCAGGACGGTCACCTTTGGGGTGGTGACAAGTGTGATCA  
CCTGGTTGGTGGCTGTGTTTGCTTCTGTCCCAGGAATCATCTTTACTAAATGCCAGAAAGAAGATTCTGT  
TTATGTCTGTGGCCCTTATTTCCACGAGGATGGAATAATTTCCACACAATAATGAGGAACATTTGGGG  
CTGGTCCTGCCGCTGCTCATCATGGTCATCTGCTACTCGGGAATCCTGAAAACCTGCTTCGGTGTGAA  
ACGAGAAGAAGAGGCATAGGGCAGTGAGAGTCATCTTCACCATCATGATTGTTTACTTTCTTCTGGAC  
TCCCTATAATATTGTCATTCTCCTGAACACCTTCCAGGAATCTTCGGCCTGAGTAACTGTGAAAGCACC  
AGTCAACTGGACCAAGCCACGCAGGTGACAGAGACTCTTGGGATGACTCACTGCTGCATCAATCCCATCA  
TCTATGCCTTCGTTGGGGAGAAGTTCAGAAGCCTTTTTCACATAGCTCTTGGCTGTAGGATTGCCCCACT  
CCAAAACCAAGTGTGTGGAGGTCCAGGAGTGAGACCAGGAAAGAATGTGAAAGTGACTACACAAGGACTC  
CTCGATGGTCGTGGAAAAGGAAAGTCAATTGGCAGAGCCCCTGAAGCCAGTCTTCAGGACAAAGAAGGAG  
CCTAG

>|cl|NM\_172361.3\_cds\_NP\_758871.1\_1 [gene=CD46] [db\_xref=CCDS:CCDS1484.1] [protein=membrane  
cofactor protein isoform 12 precursor] [protein\_id=NP\_758871.1] [location=160..1227] [gbkey=CDS]

ATGGAGCCTCCCGGCCCGCGAGTGTCCTTTCTTCTGCGCTTTCCTGGGTTGCTTCTGGCGGCCA  
TGGTGTTGCTGCTGTACTCCTTCTCCGATGCCTGTGAGGAGCCACCAACATTTGAAGCTATGGAGCTCAT  
TGGTAAACCAAAACCCTACTATGAGATTGGTGAACGAGTAGATTATAAGTGTAAGGATACTTCTAT  
ATACCTCCTCTTGCCACCCATACTATTTGTGATCGGAATCATACATGGCTACCTGTCTCAGATGACGCCT  
GTTATAGAGAAACATGTCCATATATACGGGATCCTTTAAATGGCCAAGCAGTCCCTGCAAATGGGACTTA

CGAGTTTGGTTATCAGATGCACTTTATTTGTAATGAGGGTTATTACTTAATTGGTGAAGAAATTCTATAT  
TGTGAACTTAAAGGATCAGTAGCAATTTGGAGCGGTAAGCCCCCAATATGTGAAAAGGTTTTGTGTACAC  
CACCTCCAAAAATAAAAAATGGAAAACACACCTTTAGTGAAGTAGAAGTATTTGAGTATCTTGATGCAGT  
AACTTATAGTTGTGATCCTGCACCTGGACCAGATCCATTTTCACTTATTGGAGAGAGCACGATTTATTGT  
GGTGACAATTCAGTGTGGAGTCGTGCTGCTCCAGAGTGTAAGTGGTCAAATGTCGATTTCCAGTAGTCG  
AAAATGGAAAACAGATATCAGGATTTGGAAAAAATTTTACTACAAAGCAACAGTTATGTTTGAATGCGA  
TAAGGGTTTTTACCTCGATGGCAGCGACACAATTGTCTGTGACAGTAACAGTACTTGGGATCCCCAGTT  
CCAAAGTGTCTTAAAGGATATCCTAAACCTGAGGAAGGAATACTTGACAGTTTGGATGTTTGGGTCATTG  
CTGTGATTGTTATTGCCATAGTTGTTGGAGTTGCAGTAATTTGTGTTGTCCCGTACAGATATCTCAAAG  
GAGGAAGAAGAAAGGGAAAGCAGATGGTGGAGCTGAATATGCCACTTACCAGACTAAATCAACCACTCCA  
GCAGAGCAGAGAGGCTGA

>|NM\_078467.3\_cds\_NP\_510867.1\_1 [gene=CDKN1A] [db\_xref=CCDS:CCDS4824.1] [protein=cyclin-  
dependent kinase inhibitor 1 isoform 1] [protein\_id=NP\_510867.1] [location=100..594] [gbkey=CDS]

ATGTCAGAACCGGCTGGGGATGTCCGTCAGAACCCATGCGGCAGCAAGGCCTGCCGCCGCTCTTCGGCC  
CAGTGGACAGCGAGCAGCTGAGCCGCGACTGTGATGCGCTAATGGCGGGCTGCATCCAGGAGGCCCGTGA  
GCGATGGAACCTTCGACTTTGTCACCGAGACACCACTGGAGGGTGACTTCGCTGGGAGCGTGTGCGGGGC  
CTTGGCCTGCCAAGCTCTACCTTCCCACGGGGCCCCGGCGAGGCCGGGATGAGTTGGGAGGAGGCAGGC  
GGCCTGGCACCTCACCTGCTCTGCTGCAGGGGACAGCAGAGGAAGACCATGTGGACCTGTCACTGTCTTG  
TACCCTTGTGCCTCGCTCAGGGGAGCAGGCTGAAGGGTCCCCAGGTGGACCTGGAGACTCTCAGGGTCGA  
AAACGGCGGCAGACCAGCATGACAGATTTCTACCACTCAAACGCCGGCTGATCTTCTCAAGAGGAAGC  
CCTAA

>|cl|NM\_004064.5\_cds\_NP\_004055.1\_1 [gene=CDKN1B] [db\_xref=CCDS:CCDS8653.1] [protein=cyclin-dependent kinase inhibitor 1B] [protein\_id=NP\_004055.1] [location=473..1069] [gbkey=CDS]

ATGTCAAACGTGCGAGTGTCTAACGGGAGCCCTAGCCTGGAGCGGATGGACGCCAGGCAGGCGGAGCACC  
CCAAGCCCTCGGCCTGCAGGAACCTCTTCGGCCCCGGTGGACCACGAAGAGTTAACCCGGGACTTGGAGAA  
GCACTGCAGAGACATGGAAGAGGCGAGCCAGCGCAAGTGGAATTTGATTTTCAGAATCACAAACCCCTA  
GAGGGCAAGTACGAGTGGCAAGAGGTGGAGAAGGGCAGCTTGCCCGAGTTCTACTACAGACCCCCGCGGC  
CCCCCAAAGGTGCCTGCAAGGTGCCGGCGCAGGAGAGCCAGGATGTCAGCGGGAGCCGCCCGGCGGGCGCC  
TTTAATTGGGGCTCCGGCTAACTCTGAGGACACGCATTTGGTGGACCCAAAGACTGATCCGTCGGACAGC  
CAGACGGGGTTAGCGGAGCAATGCGCAGGAATAAGGAAGCGACCTGCAACCGACGATTCTTCTACTCAAA  
ACAAAAGAGCCAACAGAACAGAAGAAAATGTTTCAGACGGTTCCCCAAATGCCGGTTCTGTGGAGCAGAC  
GCCCAAGAAGCCTGGCCTCAGAAGACGTCAAACGTAA

>|cl|NM\_000077.5\_cds\_NP\_000068.1\_1 [gene=CDKN2A] [db\_xref=CCDS:CCDS6510.1] [protein=cyclin-dependent kinase inhibitor 2A isoform p16INK4a] [protein\_id=NP\_000068.1] [location=31..501] [gbkey=CDS]

ATGGAGCCGGCGGCGGGGAGCAGCATGGAGCCTTCGGCTGACTGGCTGGCCACGGCCGCGGCCCCGGGGTC  
GGGTAGAGGAGGTGCGGGCGCTGCTGGAGGCGGGGGCGCTGCCAACGCACCGAATAGTTACGGTCGGAG  
GCCGATCCAGGTCATGATGATGGGCAGCGCCGAGTGGCGGAGCTGCTGCTGCTCCACGGCGCGGAGCCC  
AACTGCGCCGACCCGCCACTCTACCCGACCCGTGCACGACGCTGCCCGGGAGGGCTTCTTGACACGC  
TGGTGGTGCTGCACCGGGCCGGGGCGGGCTGGACGTGCGCGATGCCTGGGGCCGTCTGCCCGTGGACCT  
GGCTGAGGAGCTGGGCCATCGCGATGTCGACGGTACCTGCGCGCGGCTGCGGGGGGCACAGAGGCAGT

AACCATGCCCCGCATAGATGCCGCGGAAGGTCCCTCAGACATCCCCGATTGA

>|cl|NM\_003879.7\_cds\_NP\_003870.4\_1 [gene=CFLAR] [db\_xref=CCDS:CCDS2337.1] [protein=CASP8 and FADD-like apoptosis regulator isoform 1] [protein\_id=NP\_003870.4] [location=456..1898] [gbkey=CDS]

ATGTCTGCTGAAGTCATCCATCAGGTTGAAGAAGCACTTGATACAGATGAGAAGGAGATGCTGCTCTTT  
TGTGCCGGGATGTTGCTATAGATGTGGTTCCACCTAATGTCAGGGACCTTCTGGATATTTACGGGAAAG  
AGGTAAGCTGTCTGTCGGGGACTTGGCTGAACTGCTCTACAGAGTGAGGCGATTTGACCTGCTCAAACGT  
ATCTTGAAGATGGACAGAAAAGCTGTGGAGACCCACCTGCTCAGGAACCCTCACCTTGTTTCGGACTATA  
GAGTGCTGATGGCAGAGATTGGTGAGGATTTGGATAAATCTGATGTGTCCTCATTAATTTCTCATGAA  
GGATTACATGGGCCGAGGCAAGATAAGCAAGGAGAAGAGTTTCTTGACCTTGTGGTTGAGTTGGAGAAA  
CTAAATCTGGTTGCCCCAGATCAACTGGATTATTAGAAAAATGCCTAAAGAACATCCACAGAATAGACC  
TGAAGACAAAAATCCAGAAGTACAAGCAGTCTGTTCAAGGAGCAGGGACAAGTTACAGGAATGTTCTCCA  
AGCAGCAATCCAAAAGAGTCTCAAGGATCCTTCAAATAACTTCAGGCTCCATAATGGGAGAAGTAAAGAA  
CAAAGACTTAAGGAACAGCTTGGCGCTCAACAAGAACCAGTGAAGAAATCCATTCAGGAATCAGAAGCTT  
TTTTGCCTCAGAGCATACCTGAAGAGAGATACAAGATGAAGAGCAAGCCCCTAGGAATCTGCCTGATAAT  
CGATTGCATTGGCAATGAGACAGAGCTTCTTCGAGACACCTTCACTTCCCTGGGCTATGAAGTCCAGAAA  
TTCTTGCATCTCAGTATGCATGGTATATCCCAGATTCTTGGCCAATTTGCCTGTATGCCCCGAGCACCGAG  
ACTACGACAGCTTTGTGTGTGTCTGGTGAGCCGAGGAGGCTCCCAGAGTGTGTATGGTGTGGATCAGAC  
TCACTCAGGGCTCCCCCTGCATCACATCAGGAGGATGTTTCATGGGAGATTCATGCCCTTATCTAGCAGGG  
AAGCCAAAGATGTTTTTTATTCAGAACTATGTGGTGTGTCAGAGGGCCAGCTGGAGGACAGCAGCCTCTTG  
AGGTGGATGGGCCAGCGATGAAGAATGTGGAATTCAAGGCTCAGAAGCGAGGGCTGTGCACAGTTCACCG  
AGAAGCTGACTTCTTCTGGAGCCTGTGTACTGCGGACATGTCCCTGCTGGAGCAGTCTCACAGCTCACCA  
TCCCTGTACCTGCAGTGCCTCTCCAGAACTGAGACAAGAAAGAAAACGCCCACTCCTGGATCTTCACA

TTGAACTCAATGGCTACATGTATGATTGGAACAGCAGAGTTTCTGCCAAGGAGAAATATTATGTCTGGCT  
GCAGCACACTCTGAGAAAGAACTTATCCTCTCCTACACATAA

>|cl|NM\_014043.4\_cds\_NP\_054762.2\_1 [gene=CHMP2B] [db\_xref=CCDS:CCDS2918.1] [protein=charged  
multivesicular body protein 2b isoform 1] [protein\_id=NP\_054762.2] [location=215..856] [gbkey=CDS]

ATGGCGTCCCTCTTCAAGAAGAAAACCGTGGATGATGTAATAAAGGAACAGAATCGAGAGTTACGAGGTA  
CACAGAGGGCTATAATCAGAGATCGAGCAGCTTTAGAGAAACAAGAAAAACAGCTGGAATTAGAAATTAA  
GAAAATGGCCAAGATTGGTAATAAGGAAGCTTGCAAAGTTTTAGCCAAACAACCTGTGCATCTACGGAAA  
CAGAAGACGAGAACTTTTGCTGTAAGTTCAAAGTTACTTCTATGTCTACACAAACAAAAGTGATGAATT  
CCCAAATGAAGATGGCTGGAGCAATGTCTACTACAGCAAAAAACAATGCAGGCAGTTAACAAGAAGATGGA  
TCCACAAAAGACATTACAAACAATGCAGAATTTCCAGAAGGAAAACATGAAAATGGAAATGACTGAAGAA  
ATGATCAATGATACACTTGATGACATCTTTGACGGTTCTGATGACGAAGAAGAAAGCCAGGATATTGTGA  
ATCAAGTTCTTGATGAAATTGGAATTGAAATTTCTGGAAAGATGGCCAAAGCTCCATCAGCTGCTCGAAG  
CTTACCATCTGCCTCTACTTCAAAGGCTACAATCTCAGATGAAGAGATTGAACGGCAACTCAAGGCTTTA  
GGAGTAGATTAG

>|cl|NM\_176812.5\_cds\_NP\_789782.1\_1 [gene=CHMP4B] [db\_xref=CCDS:CCDS13228.1]  
[protein=charged multivesicular body protein 4b] [protein\_id=NP\_789782.1] [location=122..796]  
[gbkey=CDS]

ATGTCGGTGTTTCGGGAAGCTGTTTCGGGGCTGGAGGGGGTAAGGCCGCAAGGGCGGCCCCGACCCCCAGG  
AGGCCATCCAGCGGCTGCGGGACACGGAAGAGATGTTAAGCAAGAAACAGGAGTTCCTGGAGAAGAAAAT

CGAGCAGGAGCTGACGGCCGCCAAGAAGCACGGCACCAAAAAACAAGCGCGCGGCCCTCCAGGCACTGAAG  
CGTAAGAAGAGGTATGAGAAGCAGCTGGCGCAGATCGACGGCACATTATCAACCATCGAGTTCCAGCGGG  
AGGCCCTGGAGAATGCCAACACCAACACCGAGGTGCTCAAGAACATGGGCTATGCCGCCAAGGCCATGAA  
GGCGGCCCATGACAACATGGACATCGATAAAGTTGATGAGTTAATGCAGGACATTGCTGACCAGCAAGAA  
CTTGACAGAGGAGATTTCAACAGCAATTTGAAACCTGTAGGGTTTGGAGAAGAGTTTGACGAGGATGAGC  
TCATGGCGGAATTAGAAGAACTAGAACAGGAGGAACTAGACAAGAATTTGCTGGAAATCAGTGGACCCGA  
AACAGTCCCTCTACCAAATGTTCCCTCTATAGCCCTACCATCAAAACCCGCCAAGAAGAAAGAAGAGGAG  
GACGACGACATGAAGGAATTGGAGAACTGGGCTGGATCCATGTAA

>|cl| NM\_000086.2\_cds\_NP\_000077.1\_1 [gene=CLN3] [db\_xref=CCDS:CCDS10632.1] [protein=battenin  
isoform a] [protein\_id=NP\_000077.1] [location=324..1640] [gbkey=CDS]

ATGGGAGGCTGTGCAGGCTCGCGGCGGCGCTTTTCGGATTCCGAGGGGGAGGAGACCGTCCCGGAGCCCC  
GGCTCCCTCTGTTGGACCATCAGGGCGCGCATTGGAAGAACGCGGTGGGCTTCTGGCTGCTGGGCCTTTG  
CAACAACTTCTCTTATGTGGTGATGCTGAGTGCCGCCCACGACATCCTTAGCCACAAGAGGACATCGGGA  
AACCAGAGCCATGTGGACCCAGGCCAACGCCGATCCCCACAACAGCTCATCACGATTTGACTGCAACT  
CTGTCTCTACGGCTGCTGTGCTCCTGGCGGACATCCTCCCCACACTCGTCATCAAATTGTTGGCTCCTCT  
TGGCCTTCACCTGCTGCCCTACAGCCCCCGGTTCTCGTCAGTGGGATTTGTGCTGCTGGAAGCTTCGTC  
CTGGTTGCCTTTTCTATTCTGTGGGGACCAGCCTGTGTGGTGTGGTCTTCGCTAGCATCTCATCAGGCC  
TTGGGGAGGTCACCTTCTCTCCCTCACTGCCTTCTACCCAGGGCCGTGATCTCCTGGTGGTCCTCAGG  
GACTGGGGGAGCTGGGCTGCTGGGGGCCCTGTCCTACCTGGGCCTCACCAGGCCGGCCTCTCCCCTCAG  
CAGACCCTGCTGTCCATGCTGGGTATCCCTGCCCTGCTGCTGGCCAGCTATTTCTTGTTGCTCACATCTC  
CTGAGGCCCAGGACCCTGGAGGGGAAGAAGAAGCAGAGAGCGCAGCCCGGCAGCCCCTCATAAGAACCGA  
GGCCCCGGAGTCGAAGCCAGGCTCCAGCTCCAGCCTCTCCCTTCGGGAAAGGTGGACAGTGTTC AAGGGT

CTGCTGTGGTACATTGTTCCCTTGGTCGTAGTTTACTTTGCCGAGTATTTCATTAACCAGGGACTTTTTG  
AACTCCTCTTTTTCTGGAACACTTCCCTGAGTCACGCTCAGCAATACCGCTGGTACCAGATGCTGTACCA  
GGCTGGCGTCTTTGCCTCCCGCTCTTCTCTCCGCTGCTGTGCGATCCGTTTCACCTGGGCCCTGGCCCTG  
CTGCAGTGCCTCAACCTGGTGTTCCTGCTGGCAGACGTGTGGTTCGGCTTTCTGCCAAGCATCTACCTCG  
TCTTCCTGATCATTCTGTATGAGGGGCTCCTGGGAGGCGCAGCCTACGTGAACACCTTCCACAACATCGC  
CCTGGAGACCAGTGATGAGCACCGGGAGTTTGCAATGGCGGCCACCTGCATCTCTGACACACTGGGGATC  
TCCCTGTCGGGGCTCCTGGCTTTCCTCTGCATGACTTCCTCTGCCAGCTCTCCTGA

>|cl|NM\_147780.4\_cds\_NP\_680090.1\_1 [gene=CTSB] [db\_xref=CCDS:CCDS5986.1] [protein=cathepsin B  
isoform 1 preproprotein] [protein\_id=NP\_680090.1] [location=275..1294] [gbkey=CDS]

ATGTGGCAGCTCTGGGCCTCCCTCTGCTGCCTGCTGGTGTGGCCAATGCCCCGAGCAGGCCCTCTTCC  
ATCCCTGTGCGATGAGCTGGTCAACTATGTCAACAAACGGAATACCACGTGGCAGGCCGGGCACAACCTT  
CTACAACGTGGACATGAGCTACTTGAAGAGGCTATGTGGTACCTTCTGGGTGGGCCCAAGCCACCCAG  
AGAGTTATGTTTACCGAGGACCTGAAGCTGCCTGCAAGCTTCGATGCACGGGAACAATGGCCACAGTGTC  
CCACCATCAAAGAGATCAGAGACCAGGGCTCCTGTGGCTCCTGCTGGGCCTTCGGGGCTGTGGAAGCCAT  
CTCTGACCGGATCTGCATCCACACCAATGCGCACGTGAGCGTGGAGGTGTCGGCGGAGGACCTGCTCACA  
TGCTGTGGCAGCATGTGTGGGGACGGCTGTAATGGTGGCTATCCTGCTGAAGCTTGGAACCTCTGGACAA  
GAAAAGGCCTGGTTTCTGGTGGCCTCTATGAATCCCATGTAGGGTGCAGACCGTACTCCATCCCTCCCTG  
TGAGCACCACGTCAACGGCTCCCGGCCCCCATGCACGGGGGAGGGAGATAACCCCAAGTGTAGCAAGATC  
TGTGAGCCTGGCTACAGCCCGACCTACAAACAGGACAAGCACTACGGATACAATTCCTACAGCGTCTCCA  
ATAGCGAGAAGGACATCATGGCCGAGATCTACAAAAACGGCCCCGTGGAGGGAGCTTTCTCTGTGTATTC  
GGACTTCCTGCTCTACAAGTCAGGAGTGTACCAACACGTACCCGGAGAGATGATGGGTGGCCATGCCATC  
CGCATCCTGGGCTGGGGAGTGGAGAATGGCACACCCTACTGGCTGGTTGCCAACTCCTGGAACACTGACT

GGGGTGACAATGGCTTCTTTAAATACTCAGAGGACAGGATCACTGTGGAATCGAATCAGAAGTGGTGGC  
TGGAATTCCACGCACCGATCAGTACTGGGAAAAGATCTAA

>|cl|NM\_001909.5\_cds\_NP\_001900.1\_1 [gene=CTSD] [db\_xref=CCDS:CCDS7725.1] [protein=cathepsin D  
preproprotein] [protein\_id=NP\_001900.1] [location=69..1307] [gbkey=CDS]

ATGCAGCCCTCCAGCCTTCTGCCGCTCGCCCTCTGCCTGCTGGCTGCACCCGCCTCCGCGCTCGTCAGGA  
TCCCGCTGCACAAGTTCACGTCCATCCGCCGGACCATGTCGGAGGTTGGGGGCTCTGTGGAGGACCTGAT  
TGCCAAAGGCCCGTCTCAAAGTACTCCAGGCGGTGCCAGCCGTGACCGAGGGGCCATTCCCGAGGTG  
CTCAAGAACTACATGGACGCCCAGTACTACGGGGAGATTGGCATCGGGACGCCCCCAGTGCTTCACAG  
TCGTCTTCGACACGGGGCTCCTCAACCTGTGGGTCCCCTCCATCCACTGCAAACCTGCTGGACATCGCTTG  
CTGGATCCACCACAAGTACAACAGCGACAAGTCCAGCACCTACGTGAAGAATGGTACCTCGTTTGACATC  
CACTATGGCTCGGGCAGCCTCTCCGGGTACCTGAGCCAGGACACTGTGTGGTGCCCTGCCAGTCAGCGT  
CGTCAGCCTCTGCCCTGGGCGGTGTCAAAGTGGAGAGGCAGGTCTTTGGGGAGGCCACCAAGCAGCCAGG  
CATCACCTTCATCGCAGCCAAGTTCGATGGCATCCTGGGCATGGCCTACCCCCGCATCTCCGTCAACAAC  
GTGCTGCCCCGTCTTCGACAACCTGATGCAGCAGAAGCTGGTGGACCAGAACATCTTCTCCTTCTACCTGA  
GCAGGGACCCAGATGCGCAGCCTGGGGGTGAGCTGATGCTGGGTGGCACAGACTCCAAGTATTACAAGGG  
TTCTCTGTCCTACCTGAATGTCACCCGCAAGGCCTACTGGCAGGTCCACCTGGACCAGGTGGAGGTGGCC  
AGCGGGCTGACCCTGTGCAAGGAGGGCTGTGAGGCCATTGTGGACACAGGCACTTCCCTCATGGTGGGCC  
CGGTGGATGAGGTGCGCGAGCTGCAGAAGGCCATCGGGGCCGTGCCGCTGATTCAGGGCGAGTACATGAT  
CCCCTGTGAGAAGGTGTCCACCCTGCCC CGATCACACTGAAGCTGGGAGGCAAAGGCTACAAGCTGTCC  
CCAGAGGACTACACGCTCAAGGTGTGCGAGGCCGGAAGACCCTCTGCCTGAGCGGCTTCATGGGCATGG  
ACATCCCGCCACCCAGCGGGCCACTCTGGATCCTGGGCGACGTCTTCATCGGCCGCTACTACACTGTGTT  
TGACCGTGACAACAACAGGGTGGGCTTCGCCGAGGCTGCCCGCCTCTAG

>|cl|NM\_001912.5\_cds\_NP\_001903.1\_1 [gene=CTSL] [db\_xref=CCDS:CCDS6675.1]  
[protein=procathepsin L isoform 1 preproprotein] [protein\_id=NP\_001903.1] [location=291..1292]  
[gbkey=CDS]

ATGAATCCTACACTCATCCTTGCTGCCTTTTGCCTGGGAATTGCCTCAGCTACTCTAACATTTGATCACA  
GTTTAGAGGCACAGTGGACCAAGTGAAGGCGATGCACAACAGATTATACGGCATGAATGAAGAAGGATG  
GAGGAGAGCAGTGTGGGAGAAGAACATGAAGATGATTGAACTGCACAATCAGGAATACAGGGAAGGGAAA  
CACAGCTTCACAATGGCCATGAACGCCTTTGGAGACATGACCAGTGAAGAATTCAGGCAGGTGATGAATG  
GCTTTCAAAACCGTAAGCCCAGGAAGGGGAAAAGTGTTCAGGAACCTCTGTTTTATGAGGCCCCCAGATC  
TGTGGATTGGAGAGAGAAAAGGCTACGTGACTCCTGTGAAGAATCAGGGTCAGTGTGGTTCTTGTTGGGCT  
TTTAGTGCTACTGGTGCTCTTGAAGGACAGATGTTCCGGAAAACCTGGGAGGCTTATCTCACTGAGTGAGC  
AGAATCTGGTAGACTGCTCTGGGCCTCAAGGCAATGAAGGCTGCAATGGTGGCCTAATGGATTATGCTTT  
CCAGTATGTTCCAGGATAATGGAGGCCTGGACTCTGAGGAATCCTATCCATATGAGGCAACAGAAGAATCC  
TGTAAGTACAATCCCAAGTATTCTGTTGCTAATGACACCGGCTTTGTGGACATCCCTAAGCAGGAGAAGG  
CCCTGATGAAGGCAGTTGCAACTGTGGGGCCCATTCTGTTGCTATTGATGCAGGTCATGAGTCCTTCCT  
GTTCTATAAAGAAGGCATTTATTTTGAGCCAGACTGTAGCAGTGAAGACATGGATCATGGTGTGCTGGTG  
GTTGGCTACGGATTTGAAAGCACAGAATCAGATAACAATAAATATTGGCTGGTGAAGAACAGCTGGGGTG  
AAGAATGGGGCATGGGTGGCTACGTAAAGATGGCCAAAGACCGGAGAAACCATTGTGGAATTGCCTCAGC  
AGCCAGCTACCCCACTGTGTGA

>|cl|NM\_002996.6\_cds\_NP\_002987.1\_1 [gene=CX3CL1] [db\_xref=CCDS:CCDS10779.1]  
[protein=fractalkine isoform 1 precursor] [protein\_id=NP\_002987.1] [location=80..1273] [gbkey=CDS]

ATGGCTCCGATATCTCTGTCGTGGCTGCTCCGCTTGCCACCTTCTGCCATCTGACTGTCCTGCTGGCTG  
GACAGCACACGGTGTGACGAAATGCAACATCACGTGCAGCAAGATGACATCAAAGATACCTGTAGCTTT  
GCTCATCCACTATCAACAGAACCAGGCATCATGCGGCAAACGCGCAATCATCTTGGAGACGAGACAGCAC  
AGGCTGTTCTGTGCCGACCCGAAGGAGCAATGGGTCAAGGACGCGATGCAGCATCTGGACCGCCAGGCTG  
CTGCCCTAACTCGAAATGGCGGCACCTTCGAGAAGCAGATCGGCGAGGTGAAGCCCAGGACCAACCCCTGC  
CGCCGGGGGAATGGACGAGTCTGTGGTCCTGGAGCCCGAAGCCACAGGCGAAAGCAGTAGCCTGGAGCCG  
ACTCCTTCTTCCCAGGAAGCACAGAGGGCCCTGGGGACCTCCCCAGAGCTGCCGACGGGCGTGACTGGTT  
CCTCAGGGACCAGGCTCCCCCGACGCCAAAGGCTCAGGATGGAGGGCCTGTGGGCACGGAGCTTTTCCG  
AGTGCCTCCCGTCTCCACTGCCGCCACGTGGCAGAGTTCTGCTCCCCACCAACCTGGGCCCCAGCCTCTGG  
GCTGAGGCAAAGACCTCTGAGGCCCCGTCCACCCAGGACCCCTCCACCCAGGCCTCCACTGCGTCCTCCC  
CAGCCCCAGAGGAGAATGCTCCGTCTGAAGGCCAGCGTGTGTGGGGTCAGGGACAGAGCCCCAGGCCAGA  
GAACTCTCTGGAGCGGGAGGAGATGGGTCCCGTGCCAGCGCACACGGATGCCTTCCAGGACTGGGGGCCT  
GGCAGCATGGCCACGTCTCTGTGGTCCCTGTCTCCTCAGAAGGGACCCCCAGCAGGGAGCCAGTGGCTT  
CAGGCAGCTGGACCCCTAAGGCTGAGGAACCCATCCATGCCACCATGGACCCCCAGAGGCTGGGCGTCTT  
TATCACTCCTGTCCCTGACGCCAGGCTGCCACCCGGAGGCAGGCGGTGGGGCTGCTGGCCTTCCTTGGC  
CTCCTCTTCTGCCTGGGGGTGGCCATGTTACCTACCAGAGCCTCCAGGGCTGCCCTCGAAAGATGGCAG  
GAGAGATGGCGGAGGGCCTTCGCTACATCCCCCGAGCTGTGGTAGTAATTCATATGTCCTGGTGCCCGT  
GTGA

>|cl|NM\_001008540.2\_cds\_NP\_001008540.1\_1 [gene=CXCR4] [db\_xref=CCDS:CCDS33295.1]  
[protein=C-X-C chemokine receptor type 4 isoform a] [protein\_id=NP\_001008540.1]  
[location=297..1367] [gbkey=CDS]

ATGTCCATTCTTTGCCTCTTTGCAGATATACACTTCAGATAACTACACCGAGGAAAATGGGCTCAGGGG  
ACTATGACTCCATGAAGGAACCCTGTTCCGTGAAGAAAATGCTAATTTCAATAAAATCTTCCTGCCAC  
CATCTACTCCATCATCTTCTTAAGTGGCATTGTGGGCAATGGATTGGTCATCCTGGTCATGGGTTACCAG  
AAGAACTGAGAAGCATGACGGACAAGTACAGGCTGCACCTGTCAGTGGCCGACCTCCTCTTTGTCATCA  
CGCTTCCCTTCTGGGCAGTTGATGCCGTGGCAAAGTGGTACTTTGGGAAGTTCCTATGCAAGGCAGTCCA  
TGTCATCTACACAGTCAACCTCTACAGCAGTGTCTCATCCTGGCCTTCATCAGTCTGGACCGCTACCTG  
GCCATCGTCCACGCCACCAACAGTCAGAGGCCAAGGAAGCTGTTGGCTGAAAAGGTGGTCTATGTTGGCG  
TCTGGATCCCTGCCCTCCTGCTGACTATTCCCGACTTCATCTTTGCCAACGTCAGTGAGGCAGATGACAG  
ATATATCTGTGACCGCTTCTACCCCAATGACTTGTGGGTGGTTGTGTTCCAGTTTCAGCACATCATGGTT  
GGCCTTATCCTGCCTGGTATTGTCATCCTGTCTGCTATTGCATTATCATCTCCAAGCTGTCACACTCCA  
AGGGCCACCAGAAGCGCAAGGCCCTCAAGACCACAGTCATCCTCATCCTGGCTTTCTTCGCTGTTGGCT  
GCCTTACTACATTGGGATCAGCATCGACTCCTTCATCCTCCTGGAAATCATCAAGCAAGGGTGTGAGTTT  
GAGAACTGTGCACAAGTGGATTTCCATCACCGAGGCCCTAGCTTTCTTCCACTGTTGTCTGAACCCCA  
TCCTCTATGCTTTCCTTGGAGCCAAATTTAAACCTCTGCCCAGCACGCACTCACCTCTGTGAGCAGAGG  
GTCCAGCCTCAAGATCCTCTCAAAGGAAAGCGAGGTGGACATTCATCTGTTTCCACTGAGTCTGAGTCT  
TCAAGTTTTCACTCCAGCTAA

>|cl|NM\_004938.4\_cds\_NP\_004929.2\_1 [gene=DAPK1] [db\_xref=CCDS:CCDS43842.1] [protein=death-associated protein kinase 1] [protein\_id=NP\_004929.2] [location=350..4642] [gbkey=CDS]

ATGACCGTGTTCAAGCAGGAAAACGTGGATGATTACTACGACACCGGCGAGGAACTTGGCAGTGGACAGT  
TTGCGGTTGTGAAGAAATGCCGTGAGAAAAGCACCGGCCTCCAGTATGCCGCCAAATTCATCAAGAAAAG  
GAGGACTAAGTCCAGCCGGCGGGGTGTGAGCCGCGAGGACATCGAGCGGGAGGTCAGCATCCTGAAGGAG  
ATCCAGCACCCCAATGTCATCACCTGCACGAGGTCTATGAGAACAAGACGGACGTCATCCTGATCTTGG

AACTCGTTGCAGGTGGCGAGCTGTTTGACTTCTTAGCTGAAAAGGAATCTTTAACTGAAGAGGAAGCAAC  
TGAATTTCTCAAACAAATTCTTAATGGTGTTTACTACCTGCACTCCCTTCAAATCGCCCACTTTGATCTT  
AAGCCTGAGAACATAATGCTTTTGGATAGAAATGTCCCCAAACCTCGGATCAAGATCATTGACTTTGGGT  
TGGCCCATAAAATTGACTTTGGAAATGAATTTAAAAACATATTTGGGACTCCAGAGTTTGTGCTCCTGA  
GATAGTCAACTATGAACCTCTTGGTCTTGAGGCAGATATGTGGAGTATCGGGGTAATAACCTATATCCTC  
CTAAGTGGGGCCTCCCCATTTCTTGGAGACACTAAGCAAGAAACGTTAGCAAATGTATCCGCTGTCAACT  
ACGAATTTGAGGATGAATACTTCAGTAATACCAGTGCCCTAGCCAAAGATTTCATAAGAAGACTTCTGGT  
CAAGGATCCAAAGAAGAGAATGACAATTCAAGATAGTTTGCAGCATCCCTGGATCAAGCCTAAAGATACA  
CAACAGGCACTTAGTAGAAAAGCATCAGCAGTAAACATGGAGAAATTCAAGAAGTTTGCAGCCCGGAAAA  
AATGGAAACAATCCGTTGCTTGATATCACTGTGCCAAAGATTATCCAGGTCATTCTGTCCAGAAGTAA  
CATGAGTGTTGCCAGAAGCGATGATACTCTGGATGAGGAAGACTCCTTTGTGATGAAAGCCATCATCCAT  
GCCATCAACGATGACAATGTCCCAGGCCTGCAGCACCTTCTGGGCTCATTATCCAACATATGATGTTAACC  
AACCCAACAAGCACGGGACACCTCCATTACTCATTGCTGCTGGCTGTGGGAATATTCAAATACTACAGTT  
GCTCATTAAGAGAGGCTCGAGAATCGATGTCCAGGATAAGGGCGGGTCCAATGCCGTCTACTGGGCTGCT  
CGGCATGGCCACGTCGATACCTTGAAATTTCTCAGTGAGAACAAATGCCCTTTGGATGTGAAAGACAAGT  
CTGGAGAGATGGCCCTCCACGTGGCAGCTCGCTATGGCCATGCTGACGTGGCTCAGTTACTGTGCAGCTT  
CGGCTCAAATCCCAATATCCAGGACAAGGAAGAAGAAACCCCTGCACTGTGCTGCTTGGCACGGCTAT  
TACTCTGTGGCCAAAGCCCTTTGTGAAGCCGGCTGTAACGTGAACATCAAGAACCGAGAAGGAGAGACGC  
CCCTCCTGACAGCCTCTGCCAGGGGCTACCACGACATCGTGGAGTGTCTGGCCGAACATGGAGCCGACCT  
TAATGCTTGCACAAGGACGGACACATTGCCCTTCATCTGGCTGTAAGACGGTGTGAGATGGAGGTAATC  
AAGACTCTCCTCAGCCAAGGGTGTTTCGTCGATTATCAAGACAGGCACGGCAATACTCCCCTCCATGTGG  
CATGTAAAGATGGCAACATGCCTATCGTGGTGGCCCTCTGTGAAGCAAACGCAATTTGGACATCTCAA  
CAAGTATGGGCGAACGCCTCTGCACCTTGCGGCCAACAAACGGAATCCTAGACGTGGTCCGGTATCTCTGT  
CTGATGGGAGCCAGCGTTGAGGCGCTGACCACGGACGGAAAGACGGCAGAAGATCTTGCTAGATCGGAAC  
AGCACGAGCACGTAGCAGGTCTCCTTGCAAGACTTCGAAAGGATACGCACCGAGGACTCTTCATCCAGCA

GCTCCGACCCACACAGAACCTGCAGCCAAGAATTAAGCTCAAGCTGTTTGGCCACTCGGGATCCGGGAAA  
ACCACCCTTGTAAGTCTCTCAAGTGTGGGCTGCTGAGGAGCTTTTTCAGAAGGCGTCGGCCAGACTGT  
CTTCCACCAACTCCAGCAGGTTCCACCTTACCCCTGGCTTCTAAGCCCACAGTCTCAGTGAGCATCAA  
CAACCTGTACCCAGGCTGCGAGAACGTGAGTGTGAGGAGCCGAGCATGATGTTTCGAGCCGGGTCTTACC  
AAAGGGATGCTGGAGGTGTTTGTGGCCCCGACCCACCACCCGCACTGCTCGGCCGATGACCAGTCCACCA  
AGGCCATCGACATCCAGAACGCTTATTTGAATGGAGTTGGCGATTTAGCGTGTGGGAGTTCTCTGAAA  
TCCTGTGTATTTCTGCTGTTATGACTATTTTGTCTGCAAATGATCCACGTCAATCCATGTTGTTGTCTTT  
AGTCTAGAAGAGCCCTATGAGATCCAGCTGAACCAAGTGATTTTCTGGCTCAGTTTCCTGAAGTCCCTTG  
TCCCAGTTGAAGAACCCATAGCCTTCGGTGGCAAGCTGAAGAACCCACTCCAAGTTGTCTGGTGGCCAC  
CCACGCTGACATCATGAATGTTCTCGACCGGCTGGAGGCGAGTTTGGATATGACAAAGACACATCGTTG  
CTGAAAGAGATTAGGAACAGGTTTGGAAATGATCTTCACATTTCAAATAAGCTGTTTGTCTGGATGCTG  
GGGCTTCTGGGTCAAAGGACATGAAGGTACTTCGAAATCATCTGCAAGAAATACGAAGCCAGATTGTTTC  
GGTCTGTCCTCCCATGACTCACCTGTGTGAGAAAATCATCTCCACGCTGCCTTCCTGGAGGAAGCTCAAT  
GGACCCAACCAGCTGATGTGCTGCAGCAGTTTGTGTACGACGTGCAGGACCAGCTGAACCCCTGGCCA  
GCGAGGAGGACCTCAGGCGCATTGCTCAGCAGCTCCACAGCACAGGCGAGATCAACATCATGCAAAGTGA  
AACAGTTCAGGACGTGCTGCTCCTGGACCCCCGCTGGCTCTGCACAAACGTCCTGGGGAAGTTGCTGTCC  
GTGGAGACCCACGGGCGCTGCACCACTACCGGGGCCGCTACACCGTGGAGGACATCCAGCGCCTGGTGC  
CCGACAGCGACGTGGAGGAGCTGCTGCAGATCCTCGATGCCATGGACATCTGCGCCCGGGACCTGAGCAG  
CGGGACCATGGTGGACGTCCCAGCCCTGATCAAGACAGACAACCTGCACCGCTCCTGGGCTGATGAGGAG  
GACGAGGTGATGGTGTATGGTGGCGTGCATCGTCCCCGTGGAACACCTACCCCCCTCCCATGTGGCA  
TCTTTCACAAGGTCCAGGTGAACCTGTGCCGTGGATCCACCAGCAAAGCACAGAGGGCGACGCGGACAT  
CCGCCTGTGGGTGAATGGCTGCAAGCTGGCCAACCGTGGGGCCGAGCTGCTGGTGCTGCTGGTCAACCAC  
GGCCAGGGCATTGAGGTCCAGGTCCGCGGCCTGGAGACGGAGAAGATCAAGTGCTGCCTGCTGCTGGACT  
CGGTGTGCAGCACCATTGAGAACGTCATGGCCACCACGCTGCCAGGGCTCCTGACCGTGAAGCATTACCT  
GAGCCCCCAGCAGCTGCGGGAGCACCATGAGCCCGTCATGATCTACCAGCCACGGGACTTCTTCCGGGCA

CAGACTCTGAAGGAAACCTCACTGACCAACACCATGGGGGGGTACAAGGAAAGCTTCAGCAGCATCATGT  
GCTTCGGGTGTCACGACGTCTACTCACAGGCCAGCCTCGGCATGGACATCCATGCATCAGACCTGAACCT  
CCTCACTCGGAGGAACTGAGTCGCCTGCTGGACCCGCCGACCCCCTGGGGAAGGACTGGTGCCTTCTC  
GCCATGAACTTAGGCCTCCCTGACCTCGTGGCAAAGTACAACACCAGTAACGGGGCTCCCAAGGATTTC  
TCCCCAGCCCCCTCCACGCCCTGCTGCGGGAATGGACCACCTACCCTGAGAGCACAGTGGGCACCCTCAT  
GTCCAACTGAGGGAGCTGGGTGCGCGGGATGCCGCAGACTTTTTGCTGAAGGCATCCTCTGTGTTCAAA  
ATCAACCTGGATGGCAATGGCCAGGAGGCCTATGCCTCGAGCTGCAACAGCGGCACCTCTTACAATTCCA  
TTAGCTCTGTTGTATCCCGGTGA

>|cl|NM\_014326.5\_cds\_NP\_055141.2\_1 [gene=DAPK2] [db\_xref=CCDS:CCDS10188.1] [protein=death-associated protein kinase 2 isoform 1] [protein\_id=NP\_055141.2] [location=195..1307] [gbkey=CDS]

ATGTTCCAGGCCTCAATGAGGAGTCCAAACATGGAGCCATTCAAGCAGCAGAAGGTGGAGGACTTTTATG  
ACATCGGAGAGGAGCTGGGGAGTGGCCAGTTTGCCATCGTGAAGAAGTGCCGGGAGAAGAGCACGGGGCT  
TGAGTATGCAGCCAAGTTCATCAAGAAGCGGCAGAGCCGGGCGAGCCGGCGCGGTGTGAGCCGGGAGGAG  
ATCGAGCGGGAGGTGAGCATCCTGCGGCAGGTGCTGCACCACAATGTCATCACGCTGCACGACGTCTATG  
AGAACCGCACCGACGTGGTGCTCATCCTTGAGCTAGTGTCTGGAGGAGAGCTCTTCGATTTCTGGCCCA  
GAAGGAGTCACTGAGTGAGGAGGAGGCCACCAGCTTCATTAAGCAGATCCTGGATGGGGTGAACCTACCTT  
CACACAAAGAAAATTGCTCACTTTGATCTCAAGCCAGAAAACATTATGTTGTTAGACAAGAATATTCCCA  
TTCCACACATCAAGCTGATTGACTTTGGTCTGGCTCACGAAATAGAAGATGGAGTTGAATTTAAGAATAT  
TTTTGGGACGCCGGAATTTGTTGCTCCAGAAATTGTGAACTACGAGCCCCTGGGTCTGGAGGCTGACATG  
TGGAGCATAGGCGTCATCACCTACATCCTCTTAAGTGGAGCATCCCCCTTCCTGGGAGACACGAAGCAGG  
AAACACTGGCAAATATCACAGCAGTGAGTTACGACTTTGATGAGGAATTCTTCAGCCAGACGAGCGAGCT  
GGCCAAGGACTTTATTCGGAAGCTTCTGGTTAAAGAGACCCGGAACGGCTCACAATCCAAGAGGCTCTC

AGACACCCCTGGATCACGCCGGTGGACAACCAGCAAGCCATGGTGCGCAGGGAGTCTGTGGTCAATCTGG  
AGAACTTCAGGAAGCAGTATGTCCGCAGGCGGTGGAAGCTTTCCTTCAGCATCGTGTCCCTGTGCAACCA  
CCTCACCCGCTCGCTGATGAAGAAGGTGCACCTGAGGCCGGATGAGGACCTGAGGAACTGTGAGAGTGAC  
ACTGAGGAGGACATCGCCAGGAGGAAAGCCCTCCACCCACGGAGGAGGAGCAGCACCTCCTAA

>|cl|NM\_004083.6\_cds\_NP\_004074.2\_1 [gene=DDIT3] [db\_xref=CCDS:CCDS8943.1] [protein=DNA  
damage-inducible transcript 3 protein isoform 2] [protein\_id=NP\_004074.2] [location=178..687]  
[gbkey=CDS]

ATGGCAGCTGAGTCATTGCCTTCTCCTTCGGGACACTGTCCAGCTGGGAGCTGGAAGCCTGGTATGAGG  
ACCTGCAAGAGGTCCTGTCTTCAGATGAAAATGGGGGTACCTATGTTTCACCTCCTGGAAATGAAGAGGA  
AGAATCAAAAATCTTCACCACTCTTGACCCTGCTTCTCTGGCTTGGCTGACTGAGGAGGAGCCAGAACCA  
GCAGAGGTCACAAGCACCTCCCAGAGCCCTCACTCTCCAGATTCCAGTCAGAGCTCCCTGGCTCAGGAGG  
AAGAGGAGGAAGACCAAGGGAGAACCAGGAAACGGAACAGAGTGGTCATTCCCCAGCCCGGGCTGGAAA  
GCAGCGCATGAAGGAGAAAGAACAGGAGAATGAAAGGAAAGTGGCACAGCTAGCTGAAGAGAATGAACGG  
CTCAAGCAGGAAATCGAGCGCTGACCAGGGAAGTAGAGGCGACTCGCCGAGCTCTGATTGACCGAATGG  
TGAATCTGCACCAAGCATGA

>|cl|NM\_004675.5\_cds\_NP\_004666.1\_1 [gene=DIRAS3] [db\_xref=CCDS:CCDS641.1] [protein=GTP-  
binding protein Di-Ras3 precursor] [protein\_id=NP\_004666.1] [location=146..835] [gbkey=CDS]

ATGGGTAACGCCAGCTTTGGCTCCAAGGAACAGAAGCTGCTGAAGCGGTTGCGGCTTCTGCCCCCCTGC  
TTATCCTCCGCGCCTTCAAGCCCCACAGGAAGATCAGAGATTACCGCGTCGTGGTAGTCGGCACCGCTGG

TGTGGGGAAAAGTACGCTGCTGCACAAGTGGGCGAGCGGCAACTTCCGTCATGAGTACCTGCCGACCATT  
GAAAATACCTACTGCCAGTTGCTGGGCTGCAGCCACGGTGTGCTTTCCTGCACATCACCGACAGCAAGA  
GTGGCGACGGCAACCGCGCTCTGCAGCGCCACGTTATAGCCCGGGGCCACGCCTTCGTCCTGGTCTACTC  
AGTCACCAAGAAGGAAACCCTGGAAGAGCTGAAGGCCTTCTATGAGCTGATCTGCAAGATCAAAGGTAAC  
AACCTGCATAAGTTCCCATCGTGCTGGTGGGCAATAAAAGTGATGACCCACCGGGAGGTGGCCCTGA  
ATGATGGTGCCACCTGTGCGATGGAGTGGAATTGCGCCTTCATGGAGATTTTCAGCCAAGACCGATGTGAA  
TGTGCAGGAGCTGTTCCACATGCTGCTGAATTACAAGAAAAAGCCCACCACCGCCTCCAGGAGCCCGAG  
AAGAAATCCCAGATGCCCAACACCACTGAGAAGCTGCTTGACAAGTGCATAATCATGTGA

>|cl|NM\_182643.3\_cds\_NP\_872584.2\_1 [gene=DLC1] [db\_xref=CCDS:CCDS5989.1] [protein=rho  
GTPase-activating protein 7 isoform 1] [protein\_id=NP\_872584.2] [location=376..4962] [gbkey=CDS]

ATGTCTGTAGCTATCAGAAAGAGAAGCTGGGAAGAACATGTGACCCACTGGATGGGACAGCCTTTTAATT  
CTGATGATCGTAACACAGCATGTCATCATGGACTAGTAGCTGACAGCTTGACAGGCAAGTATGGAAAAAGA  
TGCAACTCTAAATGTGGACCGCAAAGAGAAGTGTGTTTCACTACCTGACTGCTGTCATGGATCAGAGCTG  
AGAGATTTTCCTGGGAGGCCAATGGGTCATCTTCAAAGGATGTGGACGAAAATGACAGCCATGAAGGTG  
AAGATCAGTTTCTTCTCTGGAAGCCAGCACAGAAACACTAGTGCATGTTTCTGATGAGGATAACAATGC  
TGATTTATGCCTTACAGATGATAAACAGGTTTTAAATACCCAAGGGCAGAAAACATCAGGCCAACATATG  
ATCCAAGGAGCAGGCTCCTTAGAAAAGGCACTGCCCATCATACAAAGTAACCAAGTTTCTTCTAACTCCT  
GGGGAATAGCTGGTGAAACTGAATTAGCACTGGTAAAAGAAAGTGGGGAGAGAAAAGTTACTGACTCTAT  
AAGTAAAAGCCTGGAGCTTTGCAATGAAATAAGCTTAAGTGAAATAAAAGATGCACCCAAAGTAAATGCA  
GTGGATACTTTGAACGTGAAAGATATTGCACCTGAGAAACAATTGCTTAACTCTGCTGTAATTGCTCAGC  
AACGAAGGAAACCTGACCCCCCTAAAGATGAAAATGAAAGAAGCACCTGCAATGTAGTACAAAATGAGTT  
CTTGGATACTCCTTGACAAACAGAGGACTGCCATTATTAACAAACAGATTTTGGAAGCTGCCTTCTGCAG

CCTCCTTCTGCCCCAATGGAATGTCAGCTGAAAATGGCCTGGAGAAGAGTGGTTTTTCACAACATCAAA  
ACAAAAGTCCACCAAAGGTCAAGGCAGAAGATGGCATGCAGTGTTTACAATTAAAGGAGACCCTGGCCAC  
CCAGGAACCCACAGATAACCAAGTCAGACTTCGTAAGAGAAAGGAAATAAGAGAAGATCGAGATAGGGCG  
CGGCTGGACTCCATGGTGCTGCTGATTATGAAACTGGACCAGCTTGATCAGGACATAGAAAATGCCCTCA  
GCACCAGCTCCTCTCCATCAGGCACACCAACAAACCTGCGGCGGCACGTTCTGATCTGGAATCAGGATC  
TGAAAGTGGAGCAGATACCATTTTCAGTAAATCAGACACGAGTAAATTTGTCTTCTGACACTGAGTCCACG  
GACCTCCCATCTTCCACTCCAGTAGCCAATTCTGGAACCAAACCCAAGACTACGGCTATTCAAGGTATTT  
CAGAGAAGGAAAAGGCTGAAATTGAAGCCAAGGAAGCTTGTGATTGGCTACGGGCAACTGGTTTCCCCCA  
GTATGCACAGCTTTATGAAGATTTCTGTTCCCATCGATATTTCTTGGTCAAGAGAGAGCATGATTTT  
TTGGACAGAGATGCCATTGAGGCTCTATGCAGGCGTCTAAATACTTTAAACAAATGTGCGGTGATGAAGC  
TAGAAATTAGTCCTCATCGGAAACGAAGTGACGATTCAGACGAGGATGAGCCTTGTGCCATCAGTGGCAA  
ATGGACTTTCCAAAGGGACAGCAAGAGGTGGTCCCGGCTTGAAGAGTTTGATGTCTTTTCTCCAAAACAA  
GACCTGGTCCCTGGGTCCCCAGACGACTCCCACCCGAAGGACGGCCCCAGCCCCGAGGCACGCTGATGG  
ACCTCAGCGAGCGCCAGGAGGTGTCTTCCGTCCGCAGCCTCAGCAGCACTGGCAGCCTCCCCAGCCACGC  
GCCCCCAGCGAGGATGCTGCCACCCCCGGACTAACTCCGTCTCAGCGTTTGCTCCTCCAGCAACTTG  
GCAGGCAATGACGACTCTTTCGGCAGCCTGCCCTCTCCCAAGGAACTGTCCAGCTTCAGCTTCAGCATGA  
AAGGCCACGAAAAAACTGCCAAGTCCAAGACGCGCAGTCTGCTGAAACGGATGGAGAGCCTGAAGCTCAA  
GAGCTCCCATCACAGCAAGCACAAAGCGCCCTCAAAGCTGGGGTTGATCATCAGCGGGGCCATCTTGCAA  
GAGGGGATGGATGAGGAGAAGCTGAAGCAGCTCAACTGCGTGGAGATCTCCGCCCTCAATGGCAACCGCA  
TCAACGTCCCCATGGTACGAAAGAGGAGCGTTTCCAATCCACGCAGACCAGCAGCAGCAGCAGCCAGTC  
GGAGACCAGCAGCGCGGTACGACGCCCAGCCCTGTTACGAGGACCCGGAGCCTCAGTGC GTGCAACAAG  
CGGGTGGGCATGTACTTAGAGGGCTTCGATCCTTTCAATCAGTCAACATTTAACAACGTGGTGGAGCAGA  
ACTTTAAGAACCGCGAGAGCTACCCAGAGGACACGGTGTCTACATCCCTGAAGATCACAAGCCTGGCAC  
TTTCCCCAAAGCTCTACCAATGGCAGTTTCTCCCCCTCGGGGAATAACGGCTCTGTGAACTGGAGGACG  
GGAAGCTTCCACGGCCCTGGCCACATCAGCCTCAGGAGGGAAAACAGTAGCGACAGCCCCAAGGAACTGA

AGAGACGCAATTCTTCCAGCTCCATGAGCAGCCGCTGAGCATCTACGACAACGTGCCGGGCTCCATCCT  
CTACTCCAGTTCAGGGGACCTGGCGGATCTGGAGAACGAGGACATCTTCCCCGAGCTGGACGACATCCTC  
TACCACGTGAAGGGGATGCAGCGGATAGTCAATCAGTGGTCGGAGAAGTTTTCTGATGAGGGAGATTCCG  
ACTCAGCCCTGGACTCGGTCTCTCCCTGCCCCTCTCTCCAAAACAGATACACCTGGATGTGGACAACGA  
CCGAACCACACCCAGCGACCTGGACAGCACAGGCAACTCCCTGAATGAACCGGAAGAGCCCTCCGAGATC  
CCGGAAGAAGGGATTCTGGGGTTGGGGCTTCCCTAACAGGTCCAACAGGCACCGACTGAGATGGCACA  
GTTTCCAGAGCTCACATCGGCCAAGCCTCAACTCTGTATCACTACAGATTAAGTCCAGTCTGTGGCCCA  
GATGAACCTGCTGCAGAAATACTCACTCCTAAAGCTAACGGCCCTGCTGGAGAAATACACACCTTCTAAC  
AAGCATGGTTTTAGCTGGGCCGTGCCAAGTTCATGAAGAGGATCAAGGTTCCAGACTACAAGGACCGGA  
GTGTGTTTGGGGTCCCACTGACGGTCAACGTGCAGCGCACAGGACAACCGTTGCCTCAGAGCATCCAGCA  
GGCCATGCGATACCTCCGGAACCATTTGTTGGATCAGGTTGGGCTCTTCAGAAAATCGGGGGTCAAGTCC  
CGGATTCAGGCTCTGCGCCAGATGAATGAAGGTGCCATAGACTGTGTCAACTACGAAGGACAGTCTGCTT  
ATGACGTGGCAGACATGCTGAAGCAGTATTTTCGAGATCTTCTGAGCCACTAATGACGAACAACTCTC  
GGAAACCTTTCTACAGATCTACCAATATGTGCCAAGGACCAGCGCCTGCAGGCCATCAAGGCTGCCATC  
ATGCTGCTGCCTGACGAGAACCGGGAGGTTCTGCAGACCCTGCTTTATTTCTGAGCGATGTCACAGCAG  
CCGTAAAAGAAAACCAGATGACCCCAACCAACCTGGCCGTGTGCTTAGCGCCTTCCCTCTTCCATCTCAA  
CACCTGAAGAGAGAGAATTCTCTCCAGGGTAATGCAAAGAAAACAAAGTTTGGGCAAACCAGATCAG  
AAAGATTTGAATGAAAACCTAGCTGCCACTCAAGGGCTGGCCCATATGATCGCCGAGTGCAAGAAGCTTT  
TCCAGGTTCCCGAGGAAATGAGCCGATGTCGTAATTCCTATACCGAACAAGAGCTGAAGCCCCTCACTCT  
GGAAGCACTCGGGCACCTGGGTAATGATGACTCAGCTGACTACCAACACTTCTCCAGGACTGTGTGGAT  
GGCCTGTTTAAAGAAGTCAAAGAGAAGTTTAAAGGCTGGGTCAGCTACTCCACTTCGGAGCAGGCTGAGC  
TGTCTATAAGAAGGTGAGCGAAGGACCCCTCTGAGGCTTTGGAGGTCAGTCATTGAAGTCCCTGCTGT  
GCCAGAGGAAATCTTAAAGCGCCTACTTAAAGAACAGCACCTCTGGGATGTAGACCTGTTGGATTCAAAA  
GTGATCGAAATTCTGGACAGCCAACTGAAATTTACCAGTATGTCCAAAACAGTATGGCACCTCATCCTG  
CTCGAGACTACGTTGTTTTAAGAACCTGGAGGACTAATTTACCCAAAGGAGCCTGTGCCCTTTACTAAC

CTCTGTGGATCACGATCGCGCACCTGTGGTGGGTGTGAGGGTTAATGTGCTCTTGTCCAGGTATTTGATT  
GAACCCTGTGGGCCAGGAAAATCCAAACTCACCTACATGTGCAGAGTTGACTTAAGGGGCCACATGCCAG  
AATGGTACACAAAATCTTTTGGACATTGTGTGCAGCTGAAGTTGTAAAGATCCGGGATTCTTCAGTAA  
CCAGAACACTGAAACCAAAGACACCAAATCTAGGTGA

>|cl|NM\_006145.3\_cds\_NP\_006136.1\_1 [gene=DNAJB1] [db\_xref=CCDS:CCDS12312.1] [protein=dnaJ  
homolog subfamily B member 1 isoform 1] [protein\_id=NP\_006136.1] [location=49..1071] [gbkey=CDS]

ATGGGTAAAGACTACTACCAGACGTTGGGCCTGGCCCGCGGCGCGTCGGACGAGGAGATCAAGCGGGCCT  
ACCGCCGCCAGGCGCTGCGCTACCACCCGACAAGAACAAGGAGCCCGGCGCCGAGGAGAAGTTCAAGGA  
GATCGCTGAGGCCTACGACGTGCTCAGCGACCCGCGCAAGCGCGAGATCTTCGACCGCTACGGGGAGGAA  
GGCCTAAAGGGGAGTGGCCCCAGTGGCGGTAGCGGCGGTGGTGCCAATGGTACCTCTTTCAGCTACACAT  
TCCATGGAGACCCTCATGCCATGTTTGCTGAGTTCTTCGGTGGCAGAAATCCCTTTGACACCTTTTTTGG  
GCAGCGGAACGGGGAGGAAGGCATGGACATTGATGACCCATTCTCTGGCTTCCCTATGGGCATGGGTGGC  
TTCACCAACGTGAACTTTGGCCGCTCCCGCTCTGCCAAGAGCCCGCCGAAAGAAGCAAGATCCCCAG  
TCACCCACGACCTTCGAGTCTCCCTGAAGAGATCTACAGCGGCTGTACCAAGAAGATGAAAATCTCCCA  
CAAGCGGCTAAACCCCGACGGAAAGAGCATTCGAAACGAAGACAAAATATTGACCATCGAAGTGAAGAAG  
GGGTGGAAAGAAGGAACCAAATCACTTTCCCAAGGAAGGAGACCAGACCTCCAACAACATTCCAGCTG  
ATATCGTCTTTGTTTTAAAGGACAAGCCCCACAATATCTTTAAGAGAGATGGCTCTGATGTCATTTATCC  
TGCCAGGATCAGCCTCCGGGAGGCTCTGTGTGGCTGCACAGTGAACGTCCCCACTCTGGACGGCAGGACG  
ATACCCGTCGTATTCAAAGATGTTATCAGGCCTGGCATGCGGCGAAAAGTTCCTGGAGAAGGCCTCCCCC  
TCCCCAAAACACCCGAGAAACGTGGGGACCTCATTATTGAGTTTGAAGTGATCTTCCCCGAAAGGATTCC  
CCAGACATCAAGAACCGTACTTGAGCAGGTTCTTCCAATATAG

>|cl|NM\_012328.3\_cds\_NP\_036460.1\_1 [gene=DNAJB9] [db\_xref=CCDS:CCDS5752.1] [protein=dnaJ homolog subfamily B member 9 precursor] [protein\_id=NP\_036460.1] [location=241..912] [gbkey=CDS]

ATGGCTACTCCCCAGTCAATTTTCATCTTTGCAATCTGCATTTTAATGATAACAGAATTAATTCTGGCCT  
CAAAAAGCTACTATGATATCTTAGGTGTGCCAAAATCGGCATCAGAGCGCCAAATCAAGAAGGCCTTTCA  
CAAGTTGGCCATGAAGTACCACCCTGACAAAAATAAGAGCCCGGATGCTGAAGCAAAATTCAGAGAGATT  
GCAGAAGCATATGAAACACTCTCAGATGCTAATAGACGAAAAGAGTATGATACACTTGGACACAGTGCTT  
TTACTAGTGGTAAAGGACAAAGAGGTAGTGGAAGTTCTTTTGGAGCAGTCATTTAACTTCAATTTTGATGA  
CTTATTTAAAGACTTTGGCTTTTTTGGTCAAAACCAAAACACTGGATCCAAGAAGCGTTTTGAAAATCAT  
TTCCAGACACGCCAGGATGGTGGTTCCAGTAGACAAAGGCATCATTTCCAAGAATTTTCTTTTGGAGGTG  
GATTATTTGATGACATGTTTGAAGATATGGAGAAAATGTTTTCTTTTAGTGGTTTTGACTCTACCAATCA  
GCATACAGTACAGACTGAAAATAGATTTTCATGGATCTAGCAAGCACTGCAGGACTGTCACTCAACGAAGA  
GGAAATATGGTTACTACATACTGACTGTTTCAGGACAGTAG

>|cl|NM\_018370.3\_cds\_NP\_060840.2\_1 [gene=DRAM1] [db\_xref=CCDS:CCDS41823.1] [protein=DNA damage-regulated autophagy modulator protein 1] [protein\_id=NP\_060840.2] [location=211..927] [gbkey=CDS]

ATGCTGTGCTTCCTGAGGGGAATGGCTTTCGTCCCCTTCCTCTTGGTGACCTGGTCGTCAGCCGCCTTCA  
TTATCTCCTACGTGGTCGCCGTGCTCTCCGGGCACGTCAACCCCTTCCTCCCGTATATCAGTGATACGGG  
AACAACACCTCCAGAGAGTGGTATTTTTGGATTTATGATAAACTTCTCTGCATTTCTTGGTGCAGCCACG  
ATGTATACAAGATACAAAATAGTACAGAAGCAAAATCAAACCTGCTATTTTCAGCACTCCTGTTTTAACT  
TGGTGTCTTTAGTGCTTGGATTGGTGGGATGTTTCGGAATGGGCATTGTCGCCAATTTTCAGGAGTTAGC

TGTGCCAGTGGTTCATGACGGGGGCGCTCTTTGGCCTTTGTCTGTGGTGTCTGTACACGCTCCTACAG  
TCCATCATCTCTTACAAATCATGTCCCCAGTGGAACAGTCTCTCGACATGCCACATACGGATGGTCATCT  
CTGCCGTTTCTTGCGCAGCTGTCATCCCCATGATTGTCTGTGCTTCACTAATTTCCATAACCAAGCTGGA  
GTGGAATCCAAGAGAAAAAGGATTATGTATATCACGTAGTGAGTGCGATCTGTGAATGGACAGTGGCCTTT  
GGTTTTATTTTCTACTTCCTAACTTTTCATCCAAGATTTCCAGAGTGTACCCTAAGGATATCCACAGAAA  
TCAATGGTGATATTTGA

>|cl|NM\_014674.3\_cds\_NP\_055489.1\_1 [gene=EDEM1] [db\_xref=CCDS:CCDS33686.1] [protein=ER  
degradation-enhancing alpha-mannosidase-like protein 1] [protein\_id=NP\_055489.1]  
[location=100..2073] [gbkey=CDS]

ATGCAATGGCGAGCGCTCGTCTGGGGCTGGTGCTCCTCCGGCTTGGCCTCCATGGAGTATTGTGGCTCG  
TCTTCGGGCTGGGGCCAGCATGGGCTTCTACCAGCGCTTTCGGCTCAGCTTCGGCTTCCAGCGTCTGAG  
GAGCCCCGACGGCCCCGCGTCGCCCACCTCGGGGCCCCGTGGGCGGCCTGGGGGGGTATCCGGGGCCGTCTG  
TGGCTGCAGCCGCCGGGGACCGGGGCAGCGCAGAGCCCGCGCAAGGCTCCGCGGCGTCTGGGCCGGGGA  
TGTGCGGCCCAGCCAACTGGGGCTACGTGCTGGGCGGCGGGGCCGCGGCCCGGACGAGTACGAGAAGCG  
CTACAGCGGCGCCTTCCCTCCGCGAGCTGCGTGCCAGATGCGCGACCTGGCACGGGGCATGTTCTGCTTTT  
GGCTACGACAACTACATGGCTCACGCCTTCCCCAGGACGAGCTCAACCCCATCCACTGCCGCGGCCGTG  
GGCCCGACCGCGGGGACCCTTCAAATCTGAACATCAATGATGTACTAGGGAATACTCATTGACTCTTGT  
TGATGCATTGGATACACTTGCAATAATGGGAAATTCATCCGAGTTCCAGAAAGCCGTCAAGTTAGTGATC  
AACACAGTTTCATTTGACAAAGATTCCACCGTCCAAGTCTTTGAGGCCACGATAAGGGTCCTGGGAAGCC  
TCCTTTCTGCTCACAGAATAATACTGACTCCAAGCAGCCCTTTGGTGACATGACAATTAAGGACTATGA  
TAATGAGTTGTTATACATGGCCCATGACCTGGCGGTGCGGCTCCTCCCTGCTTTTGAAAACACCAAGACA  
GGGATTCCATATCCTCGGGTGAATCTAAAGACAGGAGTTCCTCCTGACACCAATAATGAGACATGCACAG

CGGGAGCCGGTTCCTCCTGGTGGAAATTTGGGATTCTGAGTCGACTCCTGGGGGACTCCACATTTGAGTG  
GGTGGCCAGACGAGCAGTGAAAGCCCTTTGGAACCTCCGGAGCAATGATACAGGATTACTAGGCAATGTC  
GTGAACATTACAGACGGGCCACTGGGTGGAAAGCAGAGTGGCCTGGGTGCCGGGCTGGACTCCTTCTATG  
AATACCTCTTGAAATCTTACATTCTTTGGAGAAAAAGAAGACCTAGAAATGTTTAATGCTGCATATCA  
GAGTATTCAGAACTACTTAAGAAGAGGGCGGGAAGCCTGCAATGAAGGAGAAGGAGACCCTCCACTCTAT  
GTCAACGTGAACATGTTTCACTGGGCAGCTGATGAACACCTGGATTGACTCTCTGCAGGCCTTTTTCCCTG  
GACTGCAGGTGCTGATAGGAGATGTGGAAGATGCCATCTGCCTTCATGCCTTCTACTATGCCATATGGAA  
ACGATATGGTGCCCTCCCTGAGAGATATAACTGGCAGCTGCAGGCCCTGACGTTCTTCTACCCACTG  
AGACCAGAGTTAGTGGAATCCACATATCTCCTCTACCAGGCAACCAAGAATCCCTTCTACCTCCATGTAG  
GAATGGATATTCTGCAGAGTCTGGAAAAGTACACAAAAGTCAAGTGTGGGTACGCCACGCTGCATCACGT  
CATTGACAAGTCCACAGAAGACCGGATGGAGAGCTTCTTCTCAGTGAGACCTGTAAATATTTGTATCTG  
CTGTTTGATGAAGACAATCCAGTACACAAGTCTGGAACCAGATACATGTTTACAACAGAGGGACACATTG  
TATCTGTGGATGAGCATCTTCGGGAATTGCCATGGAAGGAATTCTTCTCTGAAGAGGGAGGGCAGGACCA  
AGGGGGAAAAGTCTGTGCACAGGCCGAAACCTCATGAGTTAAAAGTCATCAACTCCAGCTCCAACTGCAAT  
CGTGTACCTGATGAGAGGAGGTACTCCCTGCCCTTAAAGAGCATCTACATGCGACAGATTGACCAGATGG  
TTGGTTTGATTTGA

>|cl|NM\_001961.4\_cds\_NP\_001952.1\_1 [gene=EEF2] [db\_xref=CCDS:CCDS12117.1] [protein=elongation factor 2] [protein\_id=NP\_001952.1] [location=84..2660] [gbkey=CDS]

ATGGTGAACCTCACGGTAGACCAGATCCGCGCCATCATGGACAAGAAGGCCAACATCCGCAACATGTCTG  
TCATCGCCACGTGGACCATGGCAAGTCCACGCTGACAGACTCCCTGGTGTGCAAGGCGGGCATCATCGC  
CTCGGCCCCGGGCCGGGGAGACACGCTTCACTGATACCCGGAAGGACGAGCAGGAGCGTTGCATCACCATC  
AAGTCAACTGCCATCTCCCTCTTCTACGAGCTCTCGGAGAATGACTTGAACCTCATCAAGCAGAGCAAGG

ACGGTGCCGGCTTCCTCATCAACCTCATTGACTCCCCGGGCATGTCGACTTCTCCTCGGAGGTGACTGC  
TGCCCTCCGAGTCACCGATGGCGCATTGGTGGTGGTGGACTGCGTGTCAGGCGTGTGCGTGCAGACGGAG  
ACAGTGCTGCGGCAGGCCATTGCCGAGCGCATCAAGCCTGTGCTGATGATGAACAAGATGGACCGCGCCC  
TGCTGGAGCTGCAGCTGGAGCCCGAGGAGCTCTACCAGACTTTCCAGCGCATCGTGGAGAACGTGAACGT  
CATCATCTCCACCTACGGCGAGGGCGAGAGCGGCCCATGGGCAACATCATGATCGATCCTGTCCTCGGT  
ACCGTGGGCTTTGGGTCTGGCCTCCACGGGTGGGCCTTCACCCTGAAGCAGTTTGCCGAGATGTATGTGG  
CCAAGTTCGCCGCCAAGGGGGAGGGCCAGTTGGGGCCTGCCGAGCGGGCCAAGAAAGTAGAGGACATGAT  
GAAGAAGCTGTGGGGTGACAGGTACTTTGACCCAGCCAACGGCAAGTTCAGCAAGTCAGCCACCAGCCCC  
GAAGGGAAGAAGCTGCCACGCACCTTCTGCCAGCTGATCCTGGACCCCATCTTCAAGGTGTTTGATGCGA  
TCATGAATTTCAAGAAAGAGGAGACAGCAAACTGATAGAGAACTGGACATCAAAGTGGACAGCGAGGA  
CAAGGACAAAGAAGGCAAACCCCTGCTGAAGGCTGTGATGCGCCGCTGGCTGCCTGCCGGAGACGCCTTG  
TTGCAGATGATCACCATCCACCTGCCCTCCCCTGTGACGGCCCAGAAGTACCGCTGCGAGCTCCTGTACG  
AGGGGCCCCCGGACGACGAGGCTGCCATGGGCATTAAAGCTGTGACCCCAAAGGCCCTCTTATGATGTA  
TATTTCCAAAATGGTGCCAACCTCCGACAAAGGTCGGTTCTACGCCTTTGGACGAGTCTTCTCGGGGCTG  
GTCTCCACTGGCCTGAAGGTCAGGATCATGGGGCCCACTATACCCCTGGGAAGAAGGAGGACCTCTACC  
TGAAGCCAATCCAGAGAACAATCTTGATGATGGGCCGCTACGTGGAGCCCATCGAGGATGTGCCTTGTTGG  
GAACATTGTGGGCCTCGTGGGCGTGGACCAGTTCCTGGTGAAGACGGGCACCATCACCACCTTCGAGCAC  
GCGCACAACATGCGGGTGATGAAGTTCAGCGTCAGCCCTGTTGTCAGAGTGGCCGTGGAGGCCAAGAACC  
CGGCTGACCTGCCCAAGCTGGTGGAGGGGCTGAAGCGGCTGGCCAAGTCCGACCCCATGGTGCAGTGCAT  
CATCGAGGAGTCGGGAGAGCATATCATCGCGGGCGCCGGCGAGCTGCACCTGGAGATCTGCCTGAAGGAC  
CTGGAGGAGGACCACGCCTGCATCCCCATCAAGAAATCTGACCCGGTCGTCTCGTACCGCGAGACGGTCA  
GTGAAGAGTCGAACGTGCTCTGCCTCTCCAAGTCCCCCAACAAGCACAACCGGCTGTACATGAAGGCGCG  
GCCCTTCCCCGACGGCCTGGCCGAGGACATCGATAAAGGCGAGGTGTCCGCCCGTCAGGAGCTCAAGCAG  
CGGGCGCGCTACCTGGCCGAGAAGTACGAGTGGGACGTGGCTGAGGCCCCGAAGATCTGGTGCTTTGGGC  
CCGACGGCACCGGCCCAACATCCTACCGACATCACCAAGGGTGTGCAGTACCTCAACGAGATCAAGGA

CAGTGTGGTGGCCGGCTTCCAGTGGGCCACCAAGGAGGGCGCACTGTGTGAGGAGAACATGCGGGGTGTG  
CGCTTCGACGTCCACGACGTCACCCTGCACGCCGACGCCATCCACCGCGGAGGGGGCCAGATCATCCCCA  
CAGCACGGCGCTGCCTCTATGCCAGTGTGCTGACCGCCAGCCACGCCTCATGGAGCCCATCTACCTTGT  
GGAGATCCAGTGTCCAGAGCAGGTGGTCGGTGGCATCTACGGGGTTTTGAACAGGAAGCGGGGCCACGTG  
TTCGAGGAGTCCCAGGTGGCCGGCACCCCCATGTTTGTGGTCAAGGCCTATCTGCCCGTCAACGAGTCCT  
TTGGCTTCACCGCTGACCTGAGGTCCAACACGGGCGGCCAGGCGTTCCCCAGTGTGTGTTTGACCACTG  
GCAGATCCTGCCCGGAGACCCCTTCGACAACAGCAGCCGCCCCAGCCAGGTGGTGGCGGAGACCCGCAAG  
CGCAAGGGCCTGAAAGAAGGCATCCCTGCCCTGGACAACCTCCTGGACAAATTGTAG

>|cl|NM\_013302.5\_cds\_NP\_037434.2\_1 [gene=EEF2K] [db\_xref=CCDS:CCDS10604.1]  
[protein=eukaryotic elongation factor 2 kinase] [protein\_id=NP\_037434.2] [location=479..2656]  
[gbkey=CDS]

ATGGCAGACGAAGATCTCATCTTCCGCCTGGAAGGCGTTGATGGCGGCCAGTCCCCCGAGCTGGCCATG  
ATGGTGATTCTGATGGGGACAGCGACGATGAGGAAGGTTACTTCATCTGCCCCATCACGGATGACCCAAG  
CTCGAACCAGAATGTCAATTCCAAGGTTAATAAGTACTACAGCAACCTAACAAAAAGTGAGCGGTATAGC  
TCCAGCGGGTCCCCGGCAAACCTCTTCCACTTCAAGGAAGCCTGGAAGCACGCAATCCAGAAGGCCAAGC  
ACATGCCCCGACCCCTGGGCTGAGTTCCACCTGGAAGATATTGCCACCGAACGTGCTACTCGACACAGGTA  
CAACGCCGTCACCGGGGAATGGCTGGATGATGAAGTTCTGATCAAGATGGCATCTCAGCCCTTCGGCCGA  
GGAGCAATGAGGGAGTGCTTCCGGACGAAGAAGCTCTCCAACCTTCTGCATGCCAGCAGTGGAAGGGCG  
CCTCCAACCTACGTGGCGAAGCGCTACATCGAGCCCGTAGACCGGGATGTGTACTTTGAGGACGTGCGTCT  
ACAGATGGAGGCCAAGCTCTGGGGGGAGGAGTATAATCGGCACAAGCCCCCAAGCAGGTGGACATCATG  
CAGATGTGCATCATCGAGCTGAAGGACAGACCGGGCAAGCCCCTCTTCCACCTGGAGCACTACATCGAGG  
GCAAGTACATCAAGTACAACCTCCAACCTCTGGCTTTGTCCGCGATGACAACATCCGCCTGACGCCGCAGGC

CTTCAGCCACTTCACTTTTGAGCGTTCCGGCCATCAGCTGATAGTGGTGGACATCCAGGGAGTTGGGGAT  
CTCTACACTGACCCACAGATCCACACGGAGACGGGCACTGACTTTGGAGACGGCAACCTAGGTGTCCGCG  
GGATGGCGCTCTTCTTCTACTCTCATGCCTGCAACCGGATTTGCGAGAGCATGGGCCTTGCTCCCTTTGA  
CCTCTCGCCCCGGGAGAGGGATGCAGTGAATCAGAACACCAAGCTGCTGCAATCAGCCAAGACCATCTTG  
AGAGGAACAGAGGAAAAATGTGGGAGCCCCAAGTAAGGACCCTCTCTGGGAGCCGGCCACCCCTGTCTCC  
GTCCCTTTTCAGAGAACTCTGGAGACGAGAACATGAGCGACGTGACCTTCGACTCTCTCCCTTCTTCCCC  
ATCTTCGGCCACACCACACAGCCAGAAGCTAGACCACCTCCATTGGCCAGTGTTCAAGTACCTCGATAAC  
ATGGCATCCAGAGACCATGATCATCTAGACAACCACCGGGAGTCTGAGAATAGTGGGGACAGCGGATACC  
CCAGTGAGAAGCGGGGTGAGCTGGATGACCCTGAGCCCCGAGAACATGGCCACTCATAAGTAATCGGAA  
GTACGAGTCTGACGAAGACAGCCTGGGCAGCTCTGGACGGGTATGTGTAGAGAAGTGGAATCTCCTCAAC  
TCCTCCCGCCTCCACCTGCCGAGGGCTTCGGCCGTGGCCCTGGAAGTGCAAAGGCTTAATGCTCTGGACC  
TCGAAAAGAAAATCGGGAAGTCCATTTTGGGGAAGGTCCATCTGGCCATGGTGGCTACACGAGGGTGG  
GCGCTTCTGCGAGAAGGGCGAGGAGTGGGACCAGGAGTCGGCTGTCTTCCACCTGGAGCACGCAGCCAAC  
CTGGGCGAGCTGGAGGCCATCGTGGGCCTGGGACTCATGTACTCGCAGTTGCCTCATCACATCCTAGCCG  
ATGTCTCTCTGAAGGAGACAGAAGAGAACAAAACCAAAGGATTTGATTACTTAAAGGCCGCTGAAGC  
TGGCGACAGGCAGTCCATGATCCTAGTGGCGCGAGCTTTTGAAGTCTGGCCAGAACCTCAGCCCGGACAGG  
TGCCAAGACTGGCTAGAGGCCCTGCACTGGTACAACACTGCCCTGGAGATGACGGACTGTGATGAGGGCG  
GTGAGTACGACGGAATGCAGGACGAGCCCCGGTACATGATGCTGGCCAGGGAGGCCGAGATGCTGTTAC  
AGGAGGCTACGGGCTGGAGAAGGACCCGCGAGAGATCAGGGGACTTGTATACCCAGGCAGCAGAGGCAGCG  
ATGGAAGCCATGAAGGGCCGACTGGCCAACCACTACTACCAAAGGCTGAAGAGGCCTGGGCCAGATGG  
AGGAGTAA

>|cl|NM\_005228.5\_cds\_NP\_005219.2\_1 [gene=EGFR] [db\_xref=CCDS:CCDS5514.1] [protein=epidermal growth factor receptor isoform a precursor] [protein\_id=NP\_005219.2] [location=262..3894] [gbkey=CDS]

ATGCGACCCTCCGGGACGGCCGGGGCAGCGCTCCTGGCGCTGCTGGCTGCGCTCTGCCC GGCGAGTCGGG  
CTCTGGAGGAAAAGAAAGTTTGCCAAGGCACGAGTAACAAGCTCACGCAGTTGGGCACTTTTGAAGATCA  
TTTTCTCAGCCTCCAGAGGATGTTCAATAACTGTGAGGTGGTCCTTGGGAATTTGGAAATTACCTATGTG  
CAGAGGAATTATGATCTTTCCTTCTTAAAGACCATCCAGGAGGTGGCTGGTTATGTCCTCATTGCCCTCA  
ACACAGTGGAGCGAATTCCTTTGGAAAACCTGCAGATCATCAGAGGAAATATGTACTACGAAAATTCCTA  
TGCCTTAGCAGTCTTATCTAACTATGATGCAAATAAAACCGGACTGAAGGAGCTGCCCATGAGAAATTTA  
CAGGAAATCCTGCATGGCGCCGTGCGGTTTCAGCAACAACCCTGCCCTGTGCAACGTGGAGAGCATCCAGT  
GGCGGGACATAGTCAGCAGTGACTTTCTCAGCAACATGTCGATGGACTTCCAGAACCACCTGGGCAGCTG  
CCAAAAGTGTGATCCAAGCTGTCCAATGGGAGCTGCTGGGGTGCAGGAGAGGAGAACTGCCAGAAACTG  
ACCAAAATCATCTGTGCCCAGCAGTGCTCCGGGCGCTGCCGTGGCAAGTCCCCCAGTGACTGCTGCCACA  
ACCAGTGTGCTGCAGGCTGCACAGGCCCCCGGGAGAGCGACTGCCTGGTCTGCCGCAAATTCGAGACGA  
AGCCACGTGCAAGGACACCTGCCCCCACTCATGCTCTACAACCCCAACACGTACCAGATGGATGTGAAC  
CCCGAGGGCAAATACAGCTTTGGTGCCACCTGCGTGAAGAAGTGTCCCGTAATTATGTGGTGACAGATC  
ACGGCTCGTGCGTCCGAGCCTGTGGGGCCGACAGCTATGAGATGGAGGAAGACGGCGTCCGCAAGTGTA  
GAAGTGCGAAGGGCCTTGCCGCAAAGTGTGTAACGGAATAGGTATTGGTGAATTTAAAGACTCACTCTCC  
ATAAATGCTACGAATATTAACACTTCAAAAACCTGCACCTCCATCAGTGGCGATCTCCACATCCTGCCGG  
TGGCATTTAGGGGTGACTCCTTCACACATACTCCTCCTCTGGATCCACAGGAACTGGATATTCTGAAAAC  
CGTAAAGGAAATCACAGGGTTTTTGTGATTAGGCTTGGCCTGAAAACAGGACGGACCTCCATGCCTTT  
GAGAACCTAGAAATCATACGCGGCAGGACCAAGCAACATGGTCAGTTTTCTTGCAGTCGTCAGCCTGA  
ACATAACATCCTTGGGATTACGCTCCCTCAAGGAGATAAGTGATGGAGATGTGATAATTCAGGAAACAA  
AAATTTGTGCTATGCAAATACAATAAACTGGAAAAAACTGTTTGGGACCTCCGGTCAGAAAACCAAAATT  
ATAAGCAACAGAGGTGAAAACAGCTGCAAGGCCACAGGCCAGGTCTGCCATGCCTTGTGCTCCCCGAGG  
GCTGCTGGGGCCCGGAGCCCAGGGACTGCGTCTCTTGCCGGAATGTCAGCCGAGGCAGGGAATGCGTGGA

CAAGTGCAACCTTCTGGAGGGTGAGCCAAGGGAGTTTGTGGAGAACTCTGAGTGCATACAGTGCCACCCA  
GAGTGCCTGCCTCAGGCCATGAACATCACCTGCACAGGACGGGGACCAGACAACTGTATCCAGTGTGCCC  
ACTACATTGACGGCCCCCACTGCGTCAAGACCTGCCCCGGCAGGAGTCATGGGAGAAAACAACACCCTGGT  
CTGGAAGTACGCAGACGCCGGCCATGTGTGCCACCTGTGCCATCCAACTGCACCTACGGATGCACTGGG  
CCAGGTCTTGAAGGCTGTCCAACGAATGGGCCTAAGATCCCGTCCATCGCCACTGGGATGGTGGGGGCC  
TCCTCTTGCTGCTGGTGGTGGCCCTGGGGATCGGCCTCTTCATGCGAAGGCGCCACATCGTTCGGAAGCG  
CACGCTGCGGAGGCTGCTGCAGGAGAGGGAGCTTGTGGAGCCTTTACACCCAGTGGAGAAGTCCCAAC  
CAAGCTCTCTTGAGGATCTTGAAGGAACTGAATTCAAAAAGATCAAAGTGCTGGGCTCCGGTGC GTTCG  
GCACGGTGTATAAGGGACTCTGGATCCCAGAAGGTGAGAAAGTTAAAATTCCCGTCGCTATCAAGGAATT  
AAGAGAAGCAACATCTCCGAAAGCCAACAAGGAAATCCTCGATGAAGCCTACGTGATGGCCAGCGTGGAC  
AACCCCCACGTGTGCCGCCTGCTGGGCATCTGCCTCACCTCCACCGTGCAGCTCATCACGCAGCTCATGC  
CCTTCGGCTGCCTCCTGGACTATGTCCGGGAACACAAAGACAATATTGGCTCCCAGTACCTGCTCAACTG  
GTGTGTGCAGATCGAAAGGGCATGAACTACTTGGAGGACCGTCGCTTGGTGCACCGCGACCTGGCAGCC  
AGGAACGTACTGGTGAAAACACCGCAGCATGTCAAGATCACAGATTTTGGGCTGGCCAACTGCTGGGTG  
CGGAAGAGAAAGAATACCATGCAGAAGGAGGCAAAGTGCCTATCAAGTGGATGGCATTGGAATCAATTTT  
ACACAGAATCTATACCCACCAGAGTGATGTCTGGAGCTACGGGGTGA CTGTTTGGGAGTTGATGACCTTT  
GGATCCAAGCCATATGACGGAATCCCTGCCAGCGAGATCTCCTCCATCCTGGAGAAAGGAGAACGCCTCC  
CTCAGCCACCCATATGTACCATCGATGTCTACATGATCATGGTCAAGTGCTGGATGATAGACGCAGATAG  
TCGCCCCAAAGTTCCGTGAGTTGATCATCGAATTCTCCAAAATGGCCCGAGACCCCAGCGCTACCTTGTC  
ATTCAGGGGGATGAAAGAATGCATTTGCCAAGTCCTACAGACTCCA ACTTCTACCGTGCCTGATGGATG  
AAGAAGACATGGACGACGTGGTGGATGCCGACGAGTACCTCATCCACAGCAGGGCTTCTTCAGCAGCCC  
CTCCACGTACGGACTCCCCCTCTGAGCTCTCTGAGTGCAACCAGCAACAATTCCACCGTGGCTTGCATT  
GATAGAAATGGGCTGCAAAGCTGTCCCATCAAGGAAGACAGCTTCTTG CAGCGATACAGCTCAGACCCCA  
CAGGCGCCTTGACTGAGGACAGCATAGACGACACCTTCTCCAGTGCCTGAATACATAAACCAGTCCGT  
TCCCAAAGGCCCGCTGGCTCTGTGCAGAATCCTGTCTATCACAATCAGCCTCTGAACCCCGCGCCCAGC

AGAGACCCACACTACCAGGACCCCCACAGCACTGCAGTGGGCAACCCCGAGTATCTCAACACTGTCCAGC  
CCACCTGTGTCAACAGCACATTCGACAGCCCTGCCCACTGGGCCAGAAAGGCAGCCACCAAATTAGCCT  
GGACAACCCTGACTACCAGCAGGACTTCTTTCCCAAGGAAGCCAAGCCAAATGGCATCTTTAAGGGCTCC  
ACAGCTGAAAATGCAGAATACCTAAGGGTCGCGCCACAAAGCAGTGAATTTATTGGAGCATGA

>|cl|NM\_002759.4\_cds\_NP\_002750.1\_1 [gene=EIF2AK2] [db\_xref=CCDS:CCDS1786.1]  
[protein=interferon-induced, double-stranded RNA-activated protein kinase isoform a]  
[protein\_id=NP\_002750.1] [location=491..2146] [gbkey=CDS]

ATGGCTGGTGATCTTTCAGCAGGTTTCTTCATGGAGGAACTTAATACATACCGTCAGAAGCAGGGAGTAG  
TACTTAAATATCAAGAACTGCCTAATTCAGGACCTCCACATGATAGGAGGTTTACATTTCAAGTTATAAT  
AGATGGAAGAGAATTTCCAGAAGGTGAAGGTAGATCAAAGAAGGAAGCAAAAAATGCCGCAGCCAAATTA  
GCTGTTGAGATACTTAATAAGGAAAAGAAGGCAGTTAGTCCTTTATTATTGACAACAACGAATTCTTCAG  
AAGGATTATCCATGGGGAATTACATAGGCCTTATCAATAGAATTGCCCAGAAGAAAAGACTAACTGTAAA  
TTATGAACAGTGTGCATCGGGGGTGCATGGGCCAGAAGGATTTCAATTATAAATGCAAAATGGGACAGAAA  
GAATATAGTATTGGTACAGGTTCTACTAAACAGGAAGCAAAACAATTGGCCGCTAAACTTGCATATCTTC  
AGATATTATCAGAAGAAACCTCAGTGAAATCTGACTACCTGTCCTCTGGTTCTTTTGCTACTACGTGTGA  
GTCCCAAAGCAACTCTTTAGTGACCAGCACACTCGCTTCTGAATCATCATCTGAAGGTGACTTCTCAGCA  
GATACATCAGAGATAAATTCTAACAGTGACAGTTTAAACAGTTCTTCGTTGCTTATGAATGGTCTCAGAA  
ATAATCAAAGGAAGGCAAAAAGATCTTTGGCACCCAGATTTGACCTTCCTGACATGAAAGAAACAAAGTA  
TACTGTGGACAAGAGGTTTGGCATGGATTTTAAAGAAATAGAATTAATTGGCTCAGGTGGATTGGCCAA  
GTTTTCAAAGCAAAACACAGAATTGACGGAAAGACTTACGTTATTAACGTGTAAATATAATAACGAGA  
AGGCGGAGCGTGAAGTAAAAGCATTGGCAAACTTGATCATGTAAATATTGTTCACTACAATGGCTGTTG  
GGATGGATTTGATTATGATCCTGAGACCAGTGATGATTCTCTTGAGAGCAGTGATTATGATCCTGAGAAC

AGCAAAAATAGTTCAAGGTCAAAGACTAAGTGCCTTTTCATCCAAATGGAATTCTGTGATAAAGGGACCT  
TGGAACAATGGATTGAAAAAAGAAGAGGCGAGAACTAGACAAAGTTTTGGCTTTGGAACCTTTGAACA  
AATAACAAAAGGGGTGGATTATATACATTCAAAAAAATTAATTCATAGAGATCTTAAGCCAAGTAATATA  
TTCTTAGTAGATACAAAACAAGTAAAGATTGGAGACTTTGGACTTGTAACATCTCTGAAAAATGATGGAA  
AGCGAACAAGGAGTAAGGGAACCTTTCGATACATGAGCCAGAACAGATTTCTTCGCAAGACTATGGAAA  
GGAAGTGGACCTCTACGCTTTGGGGCTAATTCTTGCTGAACTTCTTCATGTATGTGACACTGCTTTTGAA  
ACATCAAAGTTTTTCACAGACCTACGGGATGGCATCATCTCAGATATATTTGATAAAAAAGAAAAAAGCTC  
TTCTACAGAAATTACTCTCAAAGAAACCTGAGGATCGACCTAACACATCTGAAATACTAAGGACCTTGAC  
TGTGTGGAAGAAAAGCCCAGAGAAAAATGAACGACACACATGTTAG

>|cl|NM\_004836.7\_cds\_NP\_004827.4\_1 [gene=EIF2AK3] [db\_xref=CCDS:CCDS33241.1]  
[protein=eukaryotic translation initiation factor 2-alpha kinase 3 isoform 1 precursor]  
[protein\_id=NP\_004827.4] [location=191..3541] [gbkey=CDS]

ATGGAGCGCGCCATCAGCCCCGGGGCTGCTGGTACGGGCGCTGCTGCTGCTGCTGCTGCTGCTGGGGCTCG  
CGGCAAGGACGGTGGCCGCGGGGCGCGCCGTGGCCTCCCAGCGCCGACGGCGGAGGCGGCGTTCGGCCT  
CGGGGCGGCCGCTGCTCCACCTCAGCGACGCGAGTACCGGCGGCGGGCGCCGTGGCTGCGGCCGAGGTG  
ACTGTGGAGGACGCTGAGGCGCTGCCGGCAGCCGCGGGAGAGCAGGAGCCTCGGGGTCCGGAACCAGACG  
ATGAGACAGAGTTGCGACCGCGCGGCAGGTCATTAGTAATTATCAGCACTTTAGATGGGAGAATTGCTGC  
CTTGGATCCTGAAAATCATGGTAAAAAGCAGTGGGATTTGGATGTGGGATCCGGTTCCTTGGTGTCATCC  
AGCCTTAGCAAACCAGAGGTATTTGGGAATAAGATGATCATTCTTCCCTGGATGGAGCCCTCTCCAGT  
GGGACCAAGACCGTGAAAGCATGGAAACAGTTCCTTTCACAGTTGAATCACTTCTTGAATCTTCTATAA  
ATTTGGAGATGATGTTGTTTTGGTTGGAGGAAAATCTCTGACTACATATGGACTCAGTGCATATAGTGGAA  
AAGGTGAGGTATATCTGTTTCAGCTCTGGGTTGTCGCCAATGGGATAGTGACGAAATGGAACAAGAGGAAG

ACATCCTGCTTCTACAGCGTACCCAAAAAACTGTTAGAGCTGTCGGACCTCGCAGTGGCAATGAGAAGTG  
GAATTCAGTGTTGGCCACTTTGAACTTCGGTATATTCCAGACATGGAAACGAGAGCCGGATTTATTGAA  
AGCACCTTTAAGCCCAATGAGAACACAGAAGAGTCTAAAATTATTCAGATGTGGAAGAACAGGAAGCTG  
CCATAATGGACATAGTGATAAAGGTTTCGGTTGCTGACTGGAAAGTTATGGCATTAGTAAGAAGGGAGG  
ACATCTGGAATGGGAGTACCAGTTTTGTACTCCAATTGCATCTGCCTGGTTACTTAAGGATGGGAAAGTC  
ATTCCCATCAGTCTTTTTGATGATACAAGTTATACATCTAATGATGATGTTTTAGAAGATGAAGAAGACA  
TTGTAGAAGCTGCCAGAGGAGCCACAGAAAACAGTGTTTACTTGGGAATGTATAGAGGCCAGCTGTATCT  
GCAGTCATCAGTCAGAATTCAGAAAAGTTTCCTTCAAGTCCCAAGGCTTTGGAATCTGTCACTAATGAA  
AACGCAATTATTCCTTTACCAACAATCAAATGGAAACCTTAATTCATTCTCCTTCCAGAACTCCTGTCT  
TGGTAGGATCTGATGAATTTGACAAATGTCTCAGTAATGATAAGTTTTCTCATGAAGAATATAGTAATGG  
TGCACCTTCAATCTTGCAGTATCCATATGATAATGGTTATTATCTACCATACTACAAGAGGGAGAGGAAC  
AAACGAAGCACACAGATTACAGTCAGATTCCTCGACAACCCACATTACAACAAGAATATCCGCAAAAAGG  
ATCCTGTTCTTCTTTTACACTGGTGGAAAGAAATAGTTGCAACGATTTTGTTTTGTATCATAGCAACAAC  
GTTTATTGTGCGCAGGCTTTTCCATCCTCATCTCACAGGCAAAGGAAGGAGTCTGAAACTCAGTGTCAA  
ACTGAAAATAAATATGATTCTGTAAGTGGTGAAGCCAATGACAGTAGCTGGAATGACATAAAAAACTCTG  
GATATATATCACGATATCTAACTGATTTTGAGCCAATTCAATGCCTGGGACGTGGTGGCTTTGGAGTTGT  
TTTTGAAGCTAAAAACAAAGTAGATGACTGCAATTATGCTATCAAGAGGATCCGTCTCCCAATAGGGAA  
TTGGCTCGGGAAAAGGTAATGCGAGAAGTTAAAGCCTTAGCCAAGCTTGAACACCCGGGCATTGTTAGAT  
ATTTCAATGCCTGGCTCGAAGCACACCAGAGAAGTGGCAAGAAAAGATGGATGAAATTTGGCTGAAAGA  
TGAAAGCACAGACTGGCCACTCAGCTCTCCTAGCCCAATGGATGCACCATCAGTTAAAATACGCAGAATG  
GATCCTTTCGCTACAAAAGAACATATTGAAATCATAGCTCCTTCACCACAAAGAAGCAGGTCTTTTTAG  
TAGGGATTTCTGTGACCAGACAAGTTCATCTGAGAGCCAGTTCTCACCAGTGAATTCTCAGGAATGGA  
CCATGAGGACATCAGTGAGTCAGTGGATGCAGCATACAACCTCCAGGACAGTTGCCTTACAGACTGTGAT  
GTGGAAGATGGGACTATGGATGGCAATGATGAGGGGCACTCCTTTGAACTTTGTCCTTCTGAAGCTTCTC  
CTTATGTAAGGTCAAGGGAGAGAACCTCCTCTTCAATAGTATTTGAAGATTCTGGCTGTGATAATGCTTC

CAGTAAAGAAGAGCCGAAAACCTAATCGATTGCATATTGGCAACCATTGTGCTAATAAACTAACTGCTTTC  
AAGCCCACCAGTAGCAAATCTTCTTCTGAAGCTACATTGTCTATTTCTCCTCCAAGACCAACCACTTTAA  
GTTTAGATCTCACTAAAAACACCACAGAAAACTCCAGCCCAGTTCACCAAAGGTGTATCTTTACATTCA  
AATGCAGCTGTGCAGAAAAGAAAACCTCAAAGACTGGATGAATGGACGATGTACCATAGAGGAGAGAGAG  
AGGAGCGTGTGTCTGCACATCTTCTGCAGATCGCAGAGGCAGTGGAGTTTCTTCACAGTAAAGGACTGA  
TGCACAGGGACCTCAAGCCATCCAACATATTCTTTACAATGGATGATGTGGTCAAGGTTGGAGACTTTGG  
GTTAGTGACTGCAATGGACCAGGATGAGGAAGAGCAGACGGTTCTGACCCCAATGCCAGCTTATGCCAGA  
CACACAGGACAAGTAGGGACCAAACCTGTATATGAGCCCAGAGCAGATTCATGGAAACAGCTATTCTCATA  
AAGTGGACATCTTTCTTTAGGCCTGATTCTATTTGAATTGCTGTATCCATTCAGCACTCAGATGGAGAG  
AGTCAGGACCTTAAGTATGTAAGAAATCTCAAATTTCCACCATTATTTACTCAGAAATATCCTTGTGAG  
TACGTGATGGTTCAAGACATGCTCTCTCCATCCCCCATGGAACGACCTGAAGCTATAAACATCATTGAAA  
ATGCTGTATTTGAGGACTTGGACTTTCCAGGAAAAACAGTGCTCAGACAGAGGTCTCGCTCCTTGAGTTC  
ATCGGGAACAAAACATTCAAGACAGTCCAACAACCTCCCATAGCCCTTGCCAAGCAATTAG

>|cl|NM\_004094.5\_cds\_NP\_004085.1\_1 [gene=EIF2S1] [db\_xref=CCDS:CCDS9781.1] [protein=eukaryotic translation initiation factor 2 subunit 1] [protein\_id=NP\_004085.1] [location=131..1078] [gbkey=CDS]

ATGCCGGGTCTAAGTTGTAGATTTTATCAACACAAATTTCTGAGGTGGAAGATGTAGTGATGGTGAATG  
TCAGATCCATTGCTGAAATGGGGGCTTATGTCAGCTTGCTGGAATACAACAACATTGAAGGCATGATTCT  
TCTTAGTGAATTATCCAGAAGGCGTATCCGTTCTATCAACAAACTCATCCGAATTGGCAGGAATGAGTGT  
GTGGTTGTCATTAGGGTGGACAAAGAAAAAGGATATATTGATTTGTCAAAAAGAAGAGTTTCTCCAGAGG  
AAGCAATCAAATGTGAAGACAAATTCACAAAATCCAAAACCTGTTTATAGCATTCTTCGTCATGTTGCTGA  
GGTGTTAGAATACACCAAGGATGAGCAGCTGGAAAGCCTATTCCAGAGGACTGCCTGGGTCTTTGATGAC  
AAGTACAAGAGACCTGGATATGGTGCCTATGATGCATTTAAGCATGCAGTCTCAGACCCATCTATTTTGG

ATAGTTTAGATTGAATGAAGATGAACGGGAAGTACTCATTATAATATTAATAGGCGCTTGACCCACACA  
GGCTGTCAAAATTCGAGCAGATATTGAAGTGGCTTGTTATGGTTATGAAGGCATTGATGCTGTAAAAGAA  
GCCCTAAGAGCAGGTTTGAATTGTTCTACAGAAAACATGCCCATTAAGATTAATCTAATAGCTCCTCCTC  
GGTATGTAATGACTACGACAACCCTGGAGAGAACAGAAGGCCTTTCTGTCCTCAGTCAAGCTATGGCTGT  
TATCAAAGAGAAGATTGAGGAAAAGAGGGGTGTGTTCAATGTTCAAATGGAGCCCAAAGTGGTCACAGAT  
ACAGATGAGACTGAACTTGCGAGGCAGATGGAGAGGCTTGAAAGAGAAAATGCCGAAGTGGATGGAGATG  
ATGATGCAGAAGAAATGGAAGCCAAAGCTGAAGATTAA

>|cl|NM\_004095.4\_cds\_NP\_004086.1\_1 [gene=EIF4EBP1] [db\_xref=CCDS:CCDS6100.1]  
[protein=eukaryotic translation initiation factor 4E-binding protein 1] [protein\_id=NP\_004086.1]  
[location=41..397] [gbkey=CDS]

ATGTCCGGGGGCAGCAGCTGCAGCCAGACCCCAAGCCGGGCCATCCCCGCCACTCGCCGGGTGGTGCTCG  
GCGACGGCGTGCAGCTCCCGCCCGGGGACTACAGCACGACCCCGGCGGCACGCTCTTCAGCACCAACCCC  
GGGAGGTACCAGGATCATCTATGACCGGAAATTCCTGATGGAGTGTGGAAGTACCTGTGACCAAAACA  
CCCCAAGGGATCTGCCACCATTCGGGGGGTACCAGCCCTTCCAGTGATGAGCCCCCATGGAAGCCA  
GCCAGAGCCACCTGCGCAATAGCCCAGAAGATAAGCGGGCGGGCGGTGAAGAGTCACAGTTTGAGATGGA  
CATTTAA

>|cl|NM\_182917.4\_cds\_NP\_886553.3\_1 [gene=EIF4G1] [db\_xref=CCDS:CCDS54688.1]  
[protein=eukaryotic translation initiation factor 4 gamma 1 isoform 1] [protein\_id=NP\_886553.3]  
[location=417..5219] [gbkey=CDS]

ATGAACAAAGCTCCACAGTCCACAGGCCCCCACC CGCCCCATCCCCGGACTCCCACAGCCAGCGTTTC  
CCCCGGGGCAGACAGCGCCGGTGGTGTTCAGTACGCCACAAGCGACACAAATGAACACGCCTTCTCAGCC  
CCGCCAGCACTTCTACCCTAGCCGGGGCCAGCCCCCGAGCAGTGCAGCCTCCCGAGTGCAGAGTGCAGCC  
CCTGCCCCGCCCTGGCCAGCTGCCCATGTCTACCCTGCTGGATCCCAAGTAATGATGATCCCTTCCCAGA  
TCTCTACCCAGCCTCCCAGGGGGCCTACTACATCCCTGGACAGGGGGCGTTCCACATACGTTGTCCCGAC  
ACAGCAGTACCCTGTGCAGCCAGGAGCCCCAGGCTTCTATCCAGGTGCAAGCCCTACAGAATTTGGGACC  
TACGCTGGCGCCTACTATCCAGCCCAAGGGGTGCAGCAGTTTCCCACTGGCGTGGCCCCCGCCCCAGTTT  
TGATGAACCAGCCACCCCAGATTGCTCCCAAGAGGGAGCGTAAGACGATCCGAATTCGAGATCCAAACCA  
AGGAGGAAAGGATATCACAGAGGAGATCATGTCTGGGGCCCCGCACTGCCTCCACACCCACCCCTCCCCAG  
ACGGGAGGCGGTCTGGAGCCTCAAGCTAATGGGGAGACGCCCCAGGTTGCTGTCATTGTCCGGCCAGATG  
ACCGGTCACAGGGAGCAATCATTGCTGACCGGCCAGGGCTGCCTGGCCCAGAGCATAGCCCTTCAGAATC  
CCAGCCTTCGTCGCCTTCTCCGACCCCATCACCATCCCCAGTCTTGGAACCGGGGTCTGAGCCTAATCTC  
GCAGTCCTCTCTATTCTGGGGACACTATGACAACTATACAAATGTCTGTAGAAGAATCAACCCCCATCT  
CCCGTGAAACTGGGGAGCCATATCGCCTCTCTCCAGAACCCACTCCTCTCGCCGAACCCATACTGGAAGT  
AGAAGTGACACTTAGCAAACCGGTTCCAGAATCTGAGTTTTCTTCCAGTCCTCTCCAGGCTCCCACCCCT  
TTGGCATCTCACACAGTGGAAATTCATGAGCCTAATGGCATGGTCCCATCTGAAGATCTGGAACCAGAGG  
TGGAGTCAAGCCCAGAGCTTGCTCCTCCCCAGCTTGCCCCCTCCGAATCCCCTGTGCCCATTGCTCCAAC  
TGCCCAACCTGAGGAACTGCTCAACGGAGCCCCCTCGCCACCAGCTGTGGACTTAAGCCCAGTCAGTGAG  
CCAGAGGAGCAGGCCAAGGAGGTGACAGCATCAATGGCGCCCCCACCATCCCCTCTGCTACTCCAGCTA  
CGGCTCCTTCAGCTACTTCCCCAGCTCAGGAGGAGGAAATGGAAGAAGAAGAAGAAGAGGAAGAAGGAGA  
AGCAGGAGAAGCAGGAGAAGCTGAGAGTGAGAAAGGAGGAGAGGAACTGCTCCCCCAGAGAGTACCCCT  
ATTCCAGCCAACTTGCTCAGAATTTGGAGGCAGCAGCAGCCACTCAAGTGGCAGTATCTGTGCCAAAGA  
GGAGACGGAAAATTAAGGAGCTAAATAAGAAGGAGGCTGTTGGAGACCTTCTGGATGCCTTCAAGGAGGC  
GAACCCGGCAGTACCAGAGGTGGAAAATCAGCCTCCTGCAGGCAGCAATCCAGGCCCAGAGTCTGAGGGC  
AGTGGTGTGCCCCACGTCCTGAGGAAGCAGATGAGACCTGGGACTCAAAGGAAGACAAAATTCACAATG

CTGAGAACATCCAGCCCGGGGAACAGAAAGTATGAATATAAGTCAGATCAGTGGAAGCCTCTAAACCTAGA  
GGAGAAAAAACGTTACGACCGTGAGTTCCTGCTTGGTTTTAGTTTCATCTTTGCCAGTATGCAGAAGCCA  
GAGGGATTGCCACATATCAGTGACGTGGTGCTGGACAAGGCCAATAAAACACCACTGCGGCCACTGGATC  
CCACTAGACTACAAGGCATAAATTGTGGCCAGACTTCACTCCATCCTTTGCCAACCTTGGCCGGACAAC  
CCTTAGCACCCGTGGGCCCCCAAGGGGTGGGCCAGGTGGGGAGCTGCCCCGTGGGCCGCAGGCTGGCCTG  
GGACCCCGGCGCTCTCAGCAGGGACCCCGAAAAGAACCACGCAAGATCATTGCCACAGTGTTAATGACCG  
AAGATATAAACTGAACAAAGCAGAGAAAGCCTGGAAACCCAGCAGCAAGCGGACGGCGGCTGATAAGGA  
TCGAGGGGAAGAAGATGCTGATGGCAGCAAAACCCAGGACCTATTCCGCAGGGTGCGCTCCATCCTGAAT  
AAACTGACACCCAGATGTTCCAGCAGCTGATGAAGCAAGTGACGCAGCTGGCCATCGACACCGAGGAAC  
GCCTCAAAGGGGTCATTGACCTCATTTTTGAGAAGGCCATTTAGAGCCCAACTTCTCTGTGGCCTATGC  
CAACATGTGCCGCTGCCTCATGGCGCTGAAAGTGCCCACTACGGAAAAGCCAACAGTGACTGTGAACTTC  
CGAAAGCTGTTGTTGAATCGATGTCAGAAGGAGTTTGAGAAAGACAAAGATGATGATGAGGTTTTTGAGA  
AGAAGCAAAAAGAGATGGATGAAGCTGCTACGGCAGAGGAACGAGGACGCCTGAAGGAAGAGCTGGAAGA  
GGCTCGGGACATAGCCCGGCGGCGCTCTTAGGGAATATCAAGTTTATTGGAGAGTTGTTCAAACCTGAAG  
ATGTTAACAGAGGCAATAATGCATGACTGTGTGGTCAAACCTGCTTAAGAACCATGATGAAGAGTCCCTTG  
AGTGCCCTTTGTCGTCTGCTCACCACCATTGGCAAAGACCTGGACTTTGAAAAAGCCAAGCCCCGAATGGA  
TCAGTATTTCAACCAGATGGAAAAAATCATTAAGAAAAGAAGACGTCATCCCGCATCCGCTTTATGCTG  
CAGGACGTGCTGGATCTGCGAGGGAGCAATTGGGTGCCACGCCGAGGGGATCAGGGTCCCAAGACCATTG  
ACCAGATCCATAAGGAGGCTGAGATGGAAGAACATCGAGAGCACATCAAAGTGCAGCAGCTCATGGCCAA  
GGGCAGTGACAAGCGTCGGGGCGGTCTCCAGGCCCTCCCATCAGCCGTGGACTTCCCCTTGTTGGATGAT  
GGTGGCTGGAACACAGTTCCTCATCAGCAAAGGTAGCCGCCCCATTGACACCTCACGACTACCAAGATCA  
CCAAGCCTGGCTCCATCGATTCTAACAACCAGCTCTTTGCACCTGGAGGGCGACTGAGCTGGGGCAAGGG  
CAGCAGCGGAGGCTCAGGAGCCAAGCCCTCAGACGCAGCATCAGAAGCTGCTCGCCCAGCTACTAGTACT  
TTGAATCGCTTCTCAGCCCTTCAACAAGCGGTACCCACAGAAAGCACAGATAATAGACGTGTGGTGAGA  
GGAGTAGCTTGAGCCGAGAACGAGGCGAGAAAGCTGGAGACCGAGGAGACCGCCTAGAGCGGAGTGAACG

GGGAGGGGACCGTGGGGACCGCTTGATCGTGCGCGGACACCTGCTACCAAGCGGAGCTTCAGCAAGGAA  
GTGGAGGAGCGGAGTAGAGAACGGCCCTCCCAGCCTGAGGGGCTGCGCAAGGCAGCTAGCCTCACGGAGG  
ATCGGGACCGTGGGCGGGATGCCGTGAAGCGAGAAGCTGCCCTACCCCCAGTGAGCCCCCTGAAGGCGGC  
TCTCTCTGAGGAGGAGTTAGAGAAGAAATCCAAGGCTATCATTGAGGAATATCTCCATCTCAATGACATG  
AAAGAGGCAGTCCAGTGCGTGCAGGAGCTGGCCTCACCTCCTTGCTCTTCATCTTTGTACGGCATGGTG  
TCGAGTCTACGCTGGAGCGCAGTGCCATTGCTCGTGAGCATATGGGGCAGCTGCTGCACCAGCTGCTCTG  
TGCTGGGCATCTGTCTACTGCTCAGTACTACCAAGGGTTGTATGAAATCTTGGAATTGGCTGAGGACATG  
GAAATTGACATCCCCACGTGTGGCTCTACCTAGCGGAACTGGTAACACCCATTCTGCAGGAAGGTGGGG  
TGCCCATGGGGGAGCTGTTCAAGGAGATTACAAAGCCTCTGAGACCGTTGGGCAAAGCTGCTTCCCTGTT  
GCTGGAGATCCTGGGCCTCCTGTGCAAAAGCATGGGTCCTAAAAAGGTGGGGACGCTGTGGCGAGAAGCC  
GGGCTTAGCTGGAAGGAATTTCTACCTGAAGGCCAGGACATTGGTGCAATTCGTCGCTGAACAGAAGGTGG  
AGTATACCCTGGGAGAGGAGTCGGAAGCCCCTGGCCAGAGGGCACTCCCCTCCGAGGAGCTGAACAGGCA  
GCTGGAGAAGCTGCTGAAGGAGGGCAGCAGTAACCAGCGGGTGTTGACTGGATAGAGGCCAACCTGAGT  
GAGCAGCAGATAGTATCCAACACGTTAGTTCGAGCCCTCATGACGGCTGTCTGCTATTCTGCAATTATTT  
TTGAGACTCCCCTCCGAGTGGACGTTGCAGTGCTGAAAGCGCGAGCGAAGCTGCTGCAGAAATACCTGTG  
TGACGAGCAGAAGGAGCTACAGGCGCTCTACGCCCTCCAGGCCCTTGAGTGACCTTAGAACAGCCTCCC  
AACCTGCTGCGGATGTTCTTTGACGCACTGTATGACGAGGACGTGGTGAAGGAGGATGCCTTCTACAGTT  
GGGAGAGTAGCAAGGACCCGCTGAGCAGCAGGGCAAGGGTGTGGCCCTTAAATCTGTCACAGCCTTCTT  
CAAGTGGCTCCGTGAAGCAGAGGAGGAGTCTGACCACAACCTGA

>|cl|NM\_004448.4\_cds\_NP\_004439.2\_1 [gene=ERBB2] [db\_xref=CCDS:CCDS32642.1] [protein=receptor  
tyrosine-protein kinase erbB-2 isoform a precursor] [protein\_id=NP\_004439.2] [location=176..3943]  
[gbkey=CDS]

ATGGAGCTGGCGGCCTTGTGCCGCTGGGGGCTCCTCCTCGCCCTCTTGCCCCCGGAGCCGCGAGCACCC  
AAGTGTGCACCGGCACAGACATGAAGCTGCGGCTCCCTGCCAGTCCCGAGACCCACCTGGACATGCTCCG  
CCACCTCTACCAGGGCTGCCAGGTGGTGCAGGGAAACCTGGAACCTACCTACCTGCCCACCAATGCCAGC  
CTGTCCTTCCTGCAGGATATCCAGGAGGTGCAGGGCTACGTGCTCATCGCTCACAACCAAGTGAGGCAGG  
TCCCACTGCAGAGGCTGCGGATTGTGCGAGGCACCCAGCTCTTTGAGGACAACTATGCCCTGGCCGTGCT  
AGACAATGGAGACCCGCTGAACAATACCACCCCTGTCACAGGGGCCTCCCAGGAGGCCTGCGGGAGCTG  
CAGCTTCGAAGCCTCACAGAGATCTTGAAAGGAGGGGTCTTGATCCAGCGGAACCCCCAGCTCTGCTACC  
AGGACACGATTTTGTGGAAGGACATCTTCACAAGAACAACCAGCTGGCTCTCACACTGATAGACACCAA  
CCGCTCTCGGGCCTGCCACCCCTGTTCTCCGATGTGTAAGGGCTCCCGCTGCTGGGGAGAGAGTTCTGAG  
GATTGTCAGAGCCTGACGCGCACTGTCTGTGCCGGTGGCTGTGCCCCGCTGCAAGGGGCCACTGCCCACTG  
ACTGCTGCCATGAGCAGTGTGCTGCCGGCTGCACGGGCCCAAGCACTCTGACTGCCTGGCCTGCCTCCA  
CTTCAACCACAGTGGCATCTGTGAGCTGCACTGCCCAGCCCTGGTCACCTACAACACAGACACGTTTGAG  
TCCATGCCCAATCCCGAGGGCCGGTATACATTCGGCGCCAGCTGTGTGACTGCCTGTCCCTACAACTACC  
TTTCTACGGACGTGGGATCCTGCACCCTCGTCTGCCCCCTGCACAACCAAGAGGTGACAGCAGAGGATGG  
AACACAGCGGTGTGAGAAGTGCAGCAAGCCCTGTGCCCGAGTGTGCTATGGTCTGGGCATGGAGCACTTG  
CGAGAGGTGAGGGCAGTTACCAGTGCCAATATCCAGGAGTTTGCTGGCTGCAAGAAGATCTTTGGGAGCC  
TGGCATTCTGCCGGAGAGCTTTGATGGGGACCCAGCCTCCAACACTGCCCCGCTCCAGCCAGAGCAGCT  
CCAAGTGTTTGAGACTCTGGAAGAGATCACAGGTTACCTATACATCTCAGCATGGCCGGACAGCCTGCCT  
GACCTCAGCGTCTTCAGAACCTGCAAGTAATCCGGGGACGAATTCTGCACAATGGCGCCTACTCGCTGA  
CCCTGCAAGGGCTGGGCATCAGCTGGCTGGGGCTGCGCTCACTGAGGGAACTGGGCAGTGGACTGGCCCT  
CATCCACCATAACACCCACCTCTGCTTCGTGCACACGGTGCCCTGGGACCAGCTCTTTCGGAACCCGCAC  
CAAGCTCTGCTCCCACTGCCAACCGGCCAGAGGACGAGTGTGTGGGCGAGGGCCTGGCCTGCCACCAGC  
TGTGCGCCCGAGGGCACTGCTGGGGTCCAGGGCCCACCCAGTGTGTCAACTGCAGCCAGTTCCTTCGGGG  
CCAGGAGTGCGTGGAGGAATGCCGAGTACTGCAGGGGCTCCCAGGGAGTATGTGAATGCCAGGCACTGT  
TTGCCGTGCCACCCTGAGTGTGAGCCCCAGAATGGCTCAGTGACCTGTTTTGGACCGGAGGCTGACCAGT

GTGTGGCCTGTGCCCATAAGGACCCTCCCTTCTGCGTGGCCCGCTGCCCCAGCGGTGTGAAACCTGA  
CCTCTCCTACATGCCCATCTGGAAGTTTCCAGATGAGGAGGGCGCATGCCAGCCTTGCCCCATCAACTGC  
ACCCACTCCTGTGTGGACCTGGATGACAAGGGCTGCCCCGCCGAGCAGAGAGCCAGCCCTCTGACGTCCA  
TCATCTCTGCGGTGGTTGGCATTCTGCTGGTCGTGGTCTTGGGGGTGGTCTTTGGGATCCTCATCAAGCG  
ACGGCAGCAGAAGATCCGGAAGTACACGATGCGGAGACTGCTGCAGGAAACGGAGCTGGTGGAGCCGCTG  
ACACCTAGCGGAGCGATGCCCAACCAGGCGCAGATGCGGATCCTGAAAGAGACGGAGCTGAGGAAGGTGA  
AGGTGCTTGGATCTGGCGCTTTTGGCACAGTCTACAAGGGCATCTGGATCCCTGATGGGGAGAATGTGAA  
AATTCCAGTGGCCATCAAAGTGTGAGGGAAAACACATCCCCCAAAGCCAACAAAGAAATCTTAGACGAA  
GCATACGTGATGGCTGGTGTGGGCTCCCATATGTCTCCCGCCTTCTGGGCATCTGCCTGACATCCACGG  
TGCAGCTGGTGACACAGCTTATGCCCTATGGCTGCCTCTTAGACCATGTCCGGGAAAACCGCGGACGCCT  
GGGCTCCCAGGACCTGCTGAACTGGTGTATGCAGATTGCCAAGGGGATGAGCTACCTGGAGGATGTGCGG  
CTCGTACACAGGGACTTGGCCGCTCGGAACGTGCTGGTCAAGAGTCCCAACCATGTCAAAATTACAGACT  
TCGGGCTGGCTCGGCTGCTGGACATTGACGAGACAGAGTACCATGCAGATGGGGGCAAGGTGCCCCATCAA  
GTGGATGGCGCTGGAGTCCATTCTCCGCCGGCGGTTACCCACCAGAGTGATGTGTGGAGTTATGGTGTG  
ACTGTGTGGGAGCTGATGACTTTTGGGGCCAAACCTTACGATGGGATCCCAGCCCGGGAGATCCCTGACC  
TGCTGGAAAAGGGGGAGCGGCTGCCCCAGCCCCCATCTGCACCATTGATGTCTACATGATCATGGTCAA  
ATGTTGGATGATTGACTCTGAATGTCGGCCAAGATTCCGGGAGTTGGTGTCTGAATTCTCCCGCATGGCC  
AGGGACCCCCAGCGCTTTGTGGTCATCCAGAATGAGGACTTGGGCCAGCCAGTCCCTTGGACAGCACCT  
TCTACCGCTCACTGCTGGAGGACGATGACATGGGGGACCTGGTGGATGCTGAGGAGTATCTGGTACCCCA  
GCAGGGCTTCTTCTGTCCAGACCCTGCCCCGGGCGCTGGGGGCATGGTCCACCACAGGCACCGCAGCTCA  
TCTACCAGGAGTGGCGGTGGGGACCTGACACTAGGGCTGGAGCCCTCTGAAGAGGAGGCCCCCAGGTCTC  
CACTGGCACCCCTCCGAAGGGGCTGGCTCCGATGTATTTGATGGTGACCTGGGAATGGGGGCAGCCAAGGG  
GCTGCAAAGCCTCCCCACACATGACCCCAGCCCTCTACAGCGGTACAGTGAGGACCCCACAGTACCCCTG  
CCCTCTGAGACTGATGGCTACGTTGCCCCCTGACCTGCAGCCCCCAGCCTGAATATGTGAACCAGCCAG  
ATGTTGCGCCCCAGCCCCCTTCGCCCCGAGAGGGCCCTCTGCCTGCTGCCCCGACCTGCTGGTGCCACTCT

GGAAAGGCCCAAGACTCTCTCCCCAGGGAAGAATGGGGTCGTCAAAGACGTTTTTGCCTTTGGGGGTGCC  
GTGGAGAACCCCGAGTACTTGACACCCAGGGAGGAGCTGCCCCTCAGCCCCACCCTCCTCCTGCCTTCA  
GCCCAGCCTTCGACAACCTCTATTACTGGGACCAGGACCCACCAGAGCGGGGGGCTCCACCCAGCACCTT  
CAAAGGGACACCTACGGCAGAGAACCCAGAGTACCTGGGTCTGGACGTGCCAGTGTGA

>|cl|NM\_001433.5\_cds\_NP\_001424.3\_1 [gene=ERN1] [db\_xref=CCDS:CCDS45762.1]  
[protein=serine/threonine-protein kinase/endoribonuclease IRE1 precursor] [protein\_id=NP\_001424.3]  
[location=116..3049] [gbkey=CDS]

ATGCCGGCCCCGGCGGCTGCTGCTGCTGCTGACGCTGCTGCTGCCCCGGCCTCGGGATTTTTGGAAGTACCA  
GCACAGTGACGCTTCCTGAAACCTTGTTGTTGTGTCAACGCTGGATGGAAGTTTGCATGCTGTCAGCAA  
GAGGACAGGCTCAATCAAATGGACTTTAAAAGAAGATCCAGTCCTGCAGGTCCCAACACATGTGGAAGAG  
CCTGCCTTTCTCCAGATCCTAATGATGGCAGCCTGTATACGCTTGGAAGCAAGAATAATGAAGGCCTGA  
CGAAACTTCCTTTTACCATCCAGAATTGGTGCAGGCATCCCCATGCCGAAGTTCAGATGGAATCCTCTA  
CATGGGTAAAAAGCAGGACATCTGGTATGTTATTGACCTCCTGACCGGAGAGAAGCAGCAGACTTTGTCA  
TCGGCCTTTGCAGATAGTCTCTGCCCATCAACCTCTCTTCTGTATCTTGGGCGAACAGAATACACCATCA  
CCATGTACGACACCAAAACCCGAGAGCTCCGGTGGAATGCCACCTACTTTGACTATGCGGCCTCACTGCC  
TGAGGACGACGTGGACTACAAGATGTCCCACTTTGTGTCCAATGGTGATGGGCTGGTGGTGAAGTGTGGAC  
AGTGAATCTGGGGACGTCCTGTGGATCCAAAACCTACGCCTCCCCTGTGGTGGCCTTTTATGTCTGGCAGC  
GGGAGGGTCTGAGGAAGGTGATGCACATCAATGTCGCTGTGGAGACCCTGCGCTATCTGACCTTCATGTC  
TGGGGAGGTGGGGCGCATCACAAAGTGGAAGTACCCGTTCCCCAAGGAGACAGAGGCCAAGAGCAAGCTG  
ACGCCCCTCTGTATGTTGGGAAATACTCTACCAGCCTCTATGCCTCTCCCTCAATGGTACACGAGGGGG  
TTGCTGTCGTGCCCCGCGGCAGCACACTTCCTTTGCTGGAAGGGCCCCAGACTGATGGCGTCACCATGG  
GGACAAGGGGGAGTGTGTGATCACGCCAGCACGGACGTCAAGTTTGATCCCGGACTCAAAGCAAGAAC

AAGCTCAACTACTTGAGGAATTACTGGCTTCTGATAGGACACCATGAAACCCCACTGTCTGCGTCTACCA  
AGATGCTGGAGAGATTTCCCAACAATCTACCCAAACATCGGGAAAATGTGATTCTGCTGATTAGAGAA  
AAAGAGCTTTGAGGAAGTTATCAACCTGGTTGACCAGACTTCAGAAAACGCACCTACCACCGTGTCTCGG  
GATGTGGAGGAGAAGCCCGCCCATGCCCCTGCCCGGCCGAGGCCCGTGGACTCCATGCTTAAGGACA  
TGGCTACCATCATCCTGAGCACCTTCTGCTGATTGGCTGGGTGGCCTTCATCATCACCTATCCCCTGAG  
CATGCATCAGCAGCAGCAGCTCCAGCACCAGCAGTTCAGAAGGAACTGGAGAAGATCCAGCTCCTGCAG  
CAGCAGCAGCAGCAGCTGCCCTTCCACCCACCTGGAGACACGGCTCAGGACGGCGAGCTCCTGGACACGT  
CTGGCCCGTACTCAGAGAGCTCGGGCACCAGCAGCCCCAGCACGTCCCCCAGGGCCTCCAACCACTCGCT  
CTGCTCCGGCAGCTCTGCCTCAAGGCTGGCAGCAGCCCCTCCCTGGAACAAGACGATGGAGATGAGGAA  
ACCAGCGTGGTGATAGTTGGGAAAATTTCTTCTGTCCCAAGGATGTCCTGGGCCATGGAGCTGAGGGCA  
CAATTGTGTACCGGGGCATGTTTGACAACCGCGACGTGGCCGTGAAGAGGATCCTCCCCGAGTGTTTTAG  
CTTCGCAGACCGTGAGGTCCAGCTGTTGCGAGAATCGGATGAGCACCCGAACGTGATCCGCTACTTCTGC  
ACGGAGAAGGACCGGCAATTCCAGTACATTGCCATCGAGCTGTGTGCAGCCACCCTGCAAGAGTATGTGG  
AGCAGAAGGACTTTGCGCATCTCGGCCTGGAGCCCATCACCTTGCTGCAGCAGACCACCTCGGGCCTGGC  
CCACCTCCACTCCCTCAACATCGTTCACAGAGACCTAAAGCCACACAACATCCTCATATCCATGCCCAAT  
GCACACGGCAAGATCAAGGCCATGATCTCCGACTTTGGCCTCTGCAAGAAGCTGGCAGTGGGCAGACACA  
GTTTCAGCCGCCGATCTGGGGTGCCTGGCACAGAAGGCTGGATCGCTCCAGAGATGCTGAGCGAAGACTG  
TAAGGAGAACCCTACCTACACGGTGGACATCTTTTCTGCAGGCTGCGTCTTTTACTACGTAATCTCTGAG  
GGCAGCCACCCTTTTGGCAAGTCCCTGCAGCGGCAGGCCAACATCCTCCTGGGTGCCTGCAGCCTTGACT  
GCTTGCACCCAGAGAAGCACGAAGACGTCATTGCACGTGAATTGATAGAGAAGATGATTGCGATGGATCC  
TCAGAAACGCCCTCAGCGAAGCATGTGCTCAAACACCCGTTCTTCTGGAGCCTAGAGAAGCAGCTCCAG  
TTCTTCCAGGACGTGAGCGACAGAATAGAAAAGGAATCCCTGGATGGCCCGATCGTGAAGCAGTTAGAGA  
GAGGCGGGAGAGCCGTGGTGAAGATGGACTGGCGGGAGAACATCACTGTCCCCCTCCAGACAGACCTGCG  
TAAATTCAGGACCTATAAAGGTGGTTCTGTGAGAGATCTCCTCCGAGCCATGAGAAATAAGAAGCACCAC  
TACCGGGAGCTGCCTGCAGAGGTGCGGGAGACGCTGGGGTCCCTCCCCGACGACTTCGTGTGCTACTTCA

CATCTCGCTTCCCCACCTCCTCGCACACACCTACCGGGCCATGGAGCTGTGCAGCCACGAGAGACTCTT  
CCAGCCCTACTACTTCCACGAGCCCCCAGAGCCCCAGCCCCAGTGACTCCAGACGCCCTCTGA

>|cl|NM\_014584.3\_cds\_NP\_055399.1\_1 [gene=ERO1A] [db\_xref=CCDS:CCDS9709.1] [protein=ERO1-like  
protein alpha isoform 2 precursor] [protein\_id=NP\_055399.1] [location=78..1484] [gbkey=CDS]

ATGGGCCGCGGCTGGGGATTCTTGTTGGCCTCCTGGGCGCCGTGTGGCTGCTCAGCTCGGGCCACGGAG  
AGGAGCAGCCCCGGAGACAGCGGCACAGAGGTGCTTCTGCCAGGTTAGTGGTACTTGGATGATTGTAC  
CTGTGATGTTGAAACCATTGATAGATTTAATAACTACAGGCTTTTCCCAAGACTACAAAACTTCTTGAA  
AGTGACTACTTTAGGTATTACAAGGTAAACCTGAAGAGGCCGTGTCCTTTCTGGAATGACATCAGCCAGT  
GTGGAAGAAGGGACTGTGCTGTCAAACCATGTCAATCTGATGAAGTTCCTGATGGAATTAAATCTGCGAG  
CTACAAGTATTCTGAAGAAGCCAATAATCTCATTGAAGAATGTGAACAAGCTGAACGACTTGGAGCAGTG  
GATGAATCTCTGAGTGAGGAAACACAGAAGGCTGTTCTTCAGTGGACCAAGCATGATGATTCTTCAGATA  
ACTTCTGTGAAGCTGATGACATTCAGTCCCCTGAAGCTGAATATGTAGATTGCTTCTTAATCCTGAGCG  
CTACACTGGTTACAAGGGACCAGATGCTTGAAAAATATGGAATGTCATCTACGAAGAAAACCTGTTTTAAG  
CCACAGACAATTAAGACCTTTAAATCCTTTGGCTTCTGGTCAAGGGACAAGTGAAGAGAACACTTTTT  
ACAGTTGGCTAGAAGGTCTCTGTGTAGAAAAAGAGCATTCTACAGACTTATATCTGGCCTACATGCAAG  
CATTAATGTGCATTTGAGTGCAAGATATCTTTTACAAGAGACCTGGTTAGAAAAGAAATGGGGACACAAC  
ATTACAGAATTTCAACAGCGATTTGATGGAATTTTGAAGGAGAAGGTCCAAGAAGGCTTAAGAAGT  
TGTATTTTCTCTACTTAATAGAACTAAGGGCTTTATCCAAAGTGTACCATTTCTCGAGCGCCCAGATTT  
TCAACTCTTTACTGGAAATAAAATTCAGGATGAGGAAAACAAAATGTTACTTCTGGAAATACTTCATGAA  
ATCAAGTCATTTCTTTGCATTTTGATGAGAATTCATTTTTGCTGGGGATAAAAAAGAAGCACACAAAC  
TAAAGGAGGACTTTGACTGCATTTTAGAAATATTTCAAGAATTATGGATTGTGTTGGTTGTTTTAAATG  
TCGTCTGTGGGGAAAGCTTCAGACTCAGGGTTTGGGCACTGCTCTGAAGATCTTATTTTCTGAGAAATTG

ATAGCAAATATGCCAGAAAGTGGACCTAGTTATGAATTCCATCTAACCAGACAAGAAATAGTATCATTAT  
TCAACGCATTTGGAAGAATTTCTACAAGTGTGAAAGAATTAGAAAACCTTCAGGAACTTGTTACAGAATAT  
TCATTAA

>|cl|NM\_003824.4\_cds\_NP\_003815.1\_1 [gene=FADD] [db\_xref=CCDS:CCDS8196.1] [protein=FAS-  
associated death domain protein] [protein\_id=NP\_003815.1] [location=165..791] [gbkey=CDS]

ATGGACCCGTTCTGGTGCTGCTGCACTCGGTGTCGTCCAGCCTGTCGAGCAGCGAGCTGACCGAGCTCA  
AGTTCCTATGCCTCGGGCGCGTGGGCAAGCGCAAGCTGGAGCGCGTGCAGAGCGGCCTAGACCTCTTCTC  
CATGCTGCTGGAGCAGAACGACCTGGAGCCCGGGCACACCGAGCTCCTGCGCGAGCTGCTCGCCTCCCTG  
CGGCGCCACGACCTGCTGCGGCGCGTGCACGACTTCGAGGCGGGGGCGGCGGCCGGGGCCGCGCCTGGGG  
AAGAAGACCTGTGTGCAGCATTTAACGTCATATGTGATAATGTGGGGAAAGATTGGAGAAGGCTGGCTCG  
TCAGCTCAAAGTCTCAGACACCAAGATCGACAGCATCGAGGACAGATACCCCCGCAACCTGACAGAGCGT  
GTGCGGGAGTCACTGAGAATCTGGAAGAACACAGAGAAGGAGAACGCAACAGTGGCCACCTGGTGGGGG  
CTCTCAGGTCCTGCCAGATGAACCTGGTGGCTGACCTGGTACAAGAGGTTAGCAGGCCCCGTGACCTCCA  
GAACAGGAGTGGGGCCATGTCCCCGATGTCATGGAACCTCAGACGCATCTACCTCCGAAGCGTCCTGA

>|cl|NM\_000043.6\_cds\_NP\_000034.1\_1 [gene=FAS] [db\_xref=CCDS:CCDS7393.1] [protein=tumor  
necrosis factor receptor superfamily member 6 isoform 1 precursor] [protein\_id=NP\_000034.1]  
[location=80..1087] [gbkey=CDS]

ATGCTGGGCATCTGGACCCTCTACCTCTGGTTCTTACGTCTGTTGCTAGATTATCGTCCAAAAGTGTTA  
ATGCCCAAGTGACTGACATCAACTCCAAGGGATTGGAATTGAGGAAGACTGTTACTACAGTTGAGACTCA

GAAC TTGGAAGGCCTGCATCATGATGGCCAATTCTGCCATAAGCCCTGTCCTCCAGGTGAAAGGAAAGCT  
AGGGACTGCACAGTCAATGGGGATGAACCAGACTGCGTGCCCTGCCAAGAAGGGAAGGAGTACACAGACA  
AAGCCCATTTTTCTTCAAATGCAGAAGATGTAGATTGTGTGATGAAGGACATGGCTTAGAAGTGGAAT  
AAACTGCACCCGGACCCAGAATACCAAGTGCAGATGTAAACCAAAC TTTTTTGTA ACTCTACTGTATGT  
GAACACTGTGACCCTTGACCAAATGTGAACATGGAATCATCAAGGAATGCACACTCACCAGCAACACCA  
AGTGCAAAGAGGAAGGATCCAGATCTAACTTGGGGTGGCTTTGTCTTCTTTTGCCAATTCCACTAAT  
TGTTTGGGTGAAGAGAAAGGAAGTACAGAAAACATGCAGAAAGCACAGAAAGGAAAACCAAGGTTCTCAT  
GAATCTCCAACTTTAAATCCTGAAACAGTGGCAATAAATTTATCTGATGTTGACTTGAGTAAATATATCA  
CCACTATTGCTGGAGTCATGACACTAAGTCAAGTTAAAGGCTTTGTTGAAAGAATGGTGTCAATGAAGC  
CAAAATAGATGAGATCAAGAATGACAATGTCCAAGACACAGCAGAACAGAAAGTTCAACTGCTTCGTAAT  
TGGCATCAACTTCATGGAAAGAAAGAAGCGTATGACACATTGATTAAAGATCTCAAAAAAGCCAATCTTT  
GTACTCTTG CAGAGAAAATTCAGACTATCATCCTCAAGGACATTACTAGTGACTCAGAAAATTCAAACTT  
CAGAAATGAAATCCAAAGCTTGGTCTAG

>|cl|NM\_000801.5\_cds\_NP\_000792.1\_1 [gene=FKBP1A] [db\_xref=CCDS:CCDS13014.1]  
[protein=peptidyl-prolyl cis-trans isomerase FKBP1A isoform a] [protein\_id=NP\_000792.1]  
[location=57..383] [gbkey=CDS]

ATGGGAGTGCAGGTGGAACCATCTCCCCAGGAGACGGGCGCACCTTCCCCAAGCGCGGCCAGACCTGCG  
TGGTGCACTACACCGGGATGCTTGAAGATGGAAAGAAATTTGATTCTCCCGGGACAGAAACAAGCCCTT  
TAAGTTTATGCTAGGCAAGCAGGAGGTGATCCGAGGCTGGGAAGAAGGGGTGCCCAGATGAGTGTGGGT  
CAGAGAGCCAACTGACTATATCTCCAGATTATGCCTATGGTGCCACTGGGCACCCAGGCATCATCCCAC  
CACATGCCACTCTCGTCTTCGATGTGGAGCTTCTAAACTGGAATGA

>|cl|NM\_004116.5\_cds\_NP\_004107.1\_1 [gene=FKBP1B] [db\_xref=CCDS:CCDS1706.1] [protein=peptidyl-prolyl cis-trans isomerase FKBP1B isoform a] [protein\_id=NP\_004107.1] [location=110..436] [gbkey=CDS]

ATGGGCGTGGAGATCGAGACCATCTCCCCGGAGACGGAAGGACATTCCCCAAGAAGGGCCAAACGTGTG  
TGGTGCACTACACAGGAATGCTCCAAATGGGAAGAAGTTTGATTCATCCAGAGACAGAAACAAACCTTT  
CAAGTTCAGAATTGGCAAACAGGAAGTCATCAAAGGTTTTGAAGAGGGTGCAGCCCAGATGAGCTTGGGG  
CAGAGGGCGAAGCTGACCTGCACCCCTGATGTGGCATATGGAGCCACGGGCCACCCCGGTGTCATCCCTC  
CCAATGCCACCTCATCTTTGACGTGGAGCTGCTCAACTTAGAGTGA

>|cl|NM\_005252.4\_cds\_NP\_005243.1\_1 [gene=FOS] [db\_xref=CCDS:CCDS9841.1] [protein=protein c-Fos] [protein\_id=NP\_005243.1] [location=156..1298] [gbkey=CDS]

ATGATGTTCTCGGGCTTCAACGCAGACTACGAGGCGTCATCTCCCGCTGCAGCAGCGGTCCCCGGCCG  
GGGATAGCCTCTCTTACTACCACTACCCGCAGACTCCTTCTCCAGCATGGGCTCGCCTGTCAACGCACA  
GGACTTCTGCACGGACCTGGCCGTCTCCAGTGCCAACTTCATTCCCACGGTCACTGCCATCTCGACCACT  
CCGGACCTGCAGTGGCTGGTGCAGCCCGCCCTCGTCTCCTCCGTGGCCCCATCGCAGACCAGAGCCCCCTC  
ACCCTTTCGGAGTCCCCGCCCCCTCCGCTGGGGCTTACTCCAGGGCTGGCGTTGTGAAGACCATGACAGG  
AGGCCGAGCGCAGAGCATTGGCAGGAGGGGCAAGGTGGAACAGTTATCTCCAGAAGAAGAAGAGAAAAGG  
AGAATCCGAAGGGAAAGGAATAAGATGGCTGCAGCCAAATGCCGCAACCGGAGGAGGGAGCTGACTGATA  
CACTCCAAGCGGAGACAGACCAACTAGAAAGATGAGAAGTCTGCTTTGCAGACCGAGATTGCCAACCTGCT  
GAAGGAGAAGGAAAACTAGAGTTCATCTGGCAGCTCACCGACCTGCCTGCAAGATCCCTGATGACCTG  
GGCTTCCCAGAAGAGATGTCTGTGGCTTCCCTTGATCTGACTGGGGGCCTGCCAGAGGTTGCCACCCCGG

AGTCTGAGGAGGCCTTCACCCTGCCTCTCCTCAATGACCCTGAGCCCAAGCCCTCAGTGGAACCTGTCAA  
GAGCATCAGCAGCATGGAGCTGAAGACCGAGCCCTTTGATGACTTCCTGTTCCCAGCATCATCCAGGCCC  
AGTGGCTCTGAGACAGCCCGCTCCGTGCCAGACATGGACCTATCTGGGTCCTTCTATGCAGCAGACTGGG  
AGCCTCTGCACAGTGGCTCCCTGGGGATGGGGCCCATGGCCACAGAGCTGGAGCCCTGTGCACTCCGGT  
GGTCACCTGTACTCCCAGCTGCACTGCTTACACGTCTTCCTTCGTCTTCACCTACCCCGAGGCTGACTCC  
TTCCCCAGCTGTGCAGCTGCCACCGCAAGGGCAGCAGCAGCAATGAGCCTTCCTCTGACTCGCTCAGCT  
CACCCACGCTGCTGGCCCTGTGA

>|cl|NM\_002015.4\_cds\_NP\_002006.2\_1 [gene=FOXO1] [db\_xref=CCDS:CCDS9371.1] [protein=forkhead  
box protein O1] [protein\_id=NP\_002006.2] [location=430..2397] [gbkey=CDS]

ATGGCCGAGGCGCCTCAGGTGGTGGAGATCGACCCGGAATTCGAGCCGCTGCCCCGGCCGCGCTCGTGCA  
CCTGGCCGCTGCCAGGCCGGAGTTTAGCCAGTCCAACCTCGGCCACCTCCAGCCCGGCGCCGTCGGGCAG  
CGCGGCTGCCAACCCCGACGCCGCGGGCGGGCCTGCCCTCGGCCTCGGCTGCCGCTGTCAGCGCCGACTTC  
ATGAGCAACCTGAGCTTGCTGGAGGAGAGCGAGGACTTCCCGCAGGCGCCCGGCTCCGTGGCGGCGGGCGG  
TGGCGGCGGGCGGCCGCGGGCCGCCACCGGGGGGCTGTGCGGGGACTTCAGGGCCCCGAGGCGGGCTG  
CCTGCACCCAGCGCCACCGCAGCCCCGCCGCCGGGCGCTGTGCGAGCACCCGCCGGTGCCCCCGCC  
GCCGCTGGGCGCTCGCGGGGAGCCGCGCAAGAGCAGCTCGTCCCGCCGAACGCGTGGGGCAACCTGT  
CCTACGCCGACCTCATCACCAGGCCATCGAGAGCTCGGCGGAGAAGCGGCTCACGCTGTCGAGATCTA  
CGAGTGGATGGTCAAGAGCGTGCCCTACTTCAAGGATAAGGGTGACAGCAACAGCTCGGCGGGCTGGAAG  
AATTCAATTCGTCATAATCTGTCCCTACACAGCAAGTTCATTCGTGTGCAGAATGAAGGAACTGGAAAAA  
GTTCTTGGTGGATGCTCAATCCAGAGGGTGGCAAGAGCGGGAAATCTCCTAGGAGAAGAGCTGCATCCAT  
GGACAACAACAGTAAATTTGCTAAGAGCCGAAGCCGAGCTGCCAAGAAGAAAGCATCTCTCCAGTCTGGC  
CAGGAGGGTGCTGGGGACAGCCCTGGATCACAGTTTTCCAAATGGCCTGCAAGCCCTGGCTCTCACAGCA

ATGATGACTTTGATAACTGGAGTACATTTGCCCCTCGAACTAGCTCAAATGCTAGTACTATTAGTGGGAG  
ACTCTACCCATTATGACCGAACAGGATGATCTTGGAGAAGGGGATGTGCATTCTATGGTGTACCCGCCA  
TCTGCCGCAAAGATGGCCTCTACTTTACCCAGTCTGTCTGAGATAAGCAATCCCGAAAACATGGAAAATC  
TTTTGGATAATCTCAACCTTCTCTCATCACCAACATCATTAACTGTTTCGACCCAGTCCTCACCTGGCAC  
CATGATGCAGCAGACGCCGTGCTACTCGTTTGCGCCACCAAACACCAGTTTGAATTCACCCAGCCCAAAC  
TACCAAAAATATACATATGGCCAATCCAGCATGAGCCCTTTGCCCCAGATGCCTATACAAACACTTCAGG  
ACAATAAGTCGAGTTATGGAGGTATGAGTCAGTATAACTGTGCGCCTGGACTCTTGAAGGAGTTGCTGAC  
TTCTGACTCTCCTCCCATAATGACATTATGACACCAGTTGATCCTGGGGTAGCCCAGCCCAACAGCCGG  
GTTCTGGGCCAGAACGTCATGATGGGCCCTAATTCGGTCATGTCAACCTATGGCAGCCAGGCATCTCATA  
ACAAAATGATGAATCCCAGCTCCCATACCCACCCTGGACATGCTCAGCAGACATCTGCAGTTAACGGGCG  
TCCCCTGCCCCACACGGTAAGCACCATGCCCCACACCTCGGGTATGAACCGCCTGACCCAAGTGAAGACA  
CCTGTACAAGTGCCTCTGCCCCACCCCATGCAGATGAGTGCCCTGGGGGGCTACTCCTCCGTGAGCAGCT  
GCAATGGCTATGGCAGAATGGGCCTTCTCCACCAGGAGAAGCTCCCAAGTGAAGTGGATGGCATGTTTAT  
TGAGCGCTTAGACTGTGACATGGAATCCATCATTCGGAATGACCTCATGGATGGAGATACATTGGATTTT  
AACTTTGACAATGTGTTGCCCAACCAAAGCTTCCCACACAGTGTCAAGACAACGACACATAGCTGGGTGT  
CAGGCTGA

>|cl|NM\_001455.4\_cds\_NP\_001446.1\_1 [gene=FOXO3] [db\_xref=CCDS:CCDS5068.1] [protein=forkhead  
box protein O3] [protein\_id=NP\_001446.1] [location=293..2314] [gbkey=CDS]

ATGGCAGAGGCACCGGCTTCCCCGGCCCCGCTCTCTCCGCTCGAAGTGGAGCTGGACCCGGAGTTCGAGC  
CCCAGAGCCGTCCGCGATCCTGTACGTGGCCCCTGCAAAGGCCGGAGCTCCAAGCGAGCCCTGCCAAGCC  
CTCGGGGGAGACGGCCGCCGACTCCATGATCCCCGAGGAGGAGGACGATGAAGACGACGAGGACGGCGGG  
GGACGGGCCGGCTCGGCCATGGCGATCGGCGGCGGCGGGAGCGGCACGCTGGGCTCCGGGCTGCTCC

TTGAGGACTCGGCCCGGGTGCTGGCACCCGGAGGGCAAGACCCCGGGTCTGGGCCAGCCACCGCGGGCGGG  
CGGGCTGAGCGGGGGTACACAGGCGCTGCTGCAGCCTCAGCAACCGCTGCCACCGCCGAGCCGGGGGCG  
GCTGGGGGCTCCGGGCAGCCGAGGAAATGTTCTGTCGCGGCGGAACGCCTGGGGAAACCTGTCCTACGCGG  
ACCTGATCACCCGCGCCATCGAGAGCTCCCCGGACAAACGGCTCACTCTGTCCCAGATCTACGAGTGGAT  
GGTGCGTTGCGTGCCCTACTTCAAGGATAAGGGGCGACAGCAACAGCTCTGCCGGCTGGAAGAACTCCATC  
CGGCACAACCTGTCACTGCATAGTCGATTCATGCGGGTCCAGAATGAGGGAAGTGGCAAGAGCTCTTGGT  
GGATCATCAACCCTGATGGGGGGAAGAGCGGAAAAGCCCCCGGCGGGGGCTGTCTCCATGGACAATAG  
CAACAAGTATACCAAGAGCCGTGGCCGCGCAGCCAAGAAGAAGGCAGCCCTGCAGACAGCCCCGAATCA  
GCTGACGACAGTCCCTCCCAGCTCTCCAAGTGGCCTGGCAGCCCCACGTCACGCAGCAGTGATGAGCTGG  
ATGCGTGGACGGACTTCCGTTACGCACCAATTCTAACGCCAGCACAGTCAGTGGCCGCTGTGCGCCAT  
CATGGCAAGCACAGAGTTGGATGAAGTCCAGGACGATGATGCGCCTCTCTCGCCCATGCTCTACAGCAGC  
TCAGCCAGCCTGTCACCTTCAGTAAGCAAGCCGTGCACGGTGGAAGTGCCACGGCTGACTGATATGGCAG  
GCACCATGAATCTGAATGATGGGCTGACTGAAAACCTCATGGACGACCTGCTGGATAACATCACGCTCCC  
GCCATCCCAGCCATCGCCCACTGGGGGACTCATGCAGCGGAGCTCTAGCTTCCCGTATACCACCAAGGGC  
TCGGGCCTGGGCTCCCCAACCAGCTCCTTTAACAGCACGGTGTTGCGACCTTCATCTCTGAACTCCCTAC  
GCCAGTCTCCCATGCAGACCATCCAAGAGAACAAGCCAGCTACCTTCTCTTCCATGTCACACTATGGTAA  
CCAGAACTCCAGGACCTGCTCACTTCGGACTCACTTAGCCACAGCGATGTCATGATGACACAGTCGGAC  
CCCTTGATGTCTCAGGCCAGCACCGCTGTGTCTGCCAGAATTCCCGCCGGAACGTGATGCTTCGCAATG  
ATCCGATGATGTCCTTTGCTGCCAGCCTAACCAGGGAAGTTTGGTCAATCAGAACTTGCTCCACCACCA  
GCACCAAACCCAGGGCGCTCTTGGTGGCAGCCGTGCCTTGTCGAATTCTGTCAGCAACATGGGCTTGAGT  
GAGTCCAGCAGCCTTGGGTCAGCCAAACACCAGCAGCAGTCTCCTGTCAGCCAGTCTATGCAAACCTCT  
CGGACTCTCTCTCAGGCTCCTCCTTGTAAGTCACTAGTGCAAACCTGCCCGTCATGGGCCATGAGAAGTT  
CCCCAGCGACTTGGACCTGGACATGTTCAATGGGAGCTTGGAATGTGACATGGAGTCCATTATCCGTAGT  
GAACTCATGGATGCTGATGGGTTGGATTTAACTTTGATTCCTCATCTCCACACAGAATGTTGTTGGTT  
TGAACGTGGGGAACCTCACTGGTGCTAAGCAGGCCTCATCTCAGAGCTGGGTGCCAGGCTGA

>|cl|NM\_000152.5\_cds\_NP\_000143.2\_1 [gene=GAA] [db\_xref=CCDS:CCDS32760.1] [protein=lysosomal alpha-glucosidase preproprotein] [protein\_id=NP\_000143.2] [location=343..3201] [gbkey=CDS]

ATGGGAGTGAGGCACCCGCCCTGCTCCCACCGGCTCCTGGCCGTCTGCGCCCTCGTGTCTTGGCAACCG  
CTGCACTCCTGGGGCACATCCTACTCCATGATTTCTGCTGGTTCCCCGAGAGCTGAGTGGCTCCTCCCC  
AGTCCTGGAGGAGACTCACCCAGCTCACCAGCAGGGAGCCAGCAGACCAGGGCCCCGGGATGCCCAGGCA  
CACCCCGGCCGTCCAGAGCAGTGCCACACAGTGCGACGTCCCCCAACAGCCGCTTCGATTGCGCCC  
CTGACAAGGCCATCACCCAGGAACAGTGCGAGGGCCGCGGCTGTTGCTACATCCCTGCAAAGCAGGGGCT  
GCAGGGAGCCCAGATGGGGCAGCCCTGGTGCTTCTTCCCACCCAGCTACCCAGCTACAAGCTGGAGAAC  
CTGAGCTCCTCTGAAATGGGCTACACGGCCACCCTGACCCGTACCACCCCACTTCTTCCCCAAGGACA  
TCCTGACCCTGCGGCTGGACGTGATGATGGAGACTGAGAACCGCCTCCACTTCACGATCAAAGATCCAGC  
TAACAGGCGCTACGAGGTGCCCTTGGAGACCCCGCATGTCCACAGCCGGGCACCGTCCCCACTCTACAGC  
GTGGAGTTCTCCGAGGAGCCCTTCGGGGTGATCGTGCGCCGGCAGCTGGACGGCCGCGTGCTGCTGAACA  
CGACGGTGCGCCCCCTGTTCTTTGCGGACCAGTTCCTTCAGCTGTCCACCTCGCTGCCCTCGCAGTATAT  
CACAGGCCTCGCCGAGCACCTCAGTCCCCTGATGCTCAGCACCAGCTGGACCAGGATCACCTGTGGAAC  
CGGGACCTTGCGCCACGCCCGGTGCGAACCTCTACGGGTCTCACCTTTCTACCTGGCGCTGGAGGACG  
GCGGGTCGGCACACGGGGTGTTCTTGCTAAACAGCAATGCCATGGATGTGGTCCTGCAGCCGAGCCCTGC  
CCTTAGCTGGAGGTGACAGGTGGGATCCTGGATGTCTACATCTTCTGGGCCAGAGCCCAAGAGCGTG  
GTGCAGCAGTACCTGGACGTTGTGGGATACCCGTTTCATGCCGCCATACTGGGGCCTGGGCTTCCACCTGT  
GCCGCTGGGGCTACTCCTCCACCGCTATCACCCGCCAGGTGGTGGAGAACATGACCAGGGCCCACTTCCC  
CCTGGACGTCCAGTGGAACGACCTGGACTACATGGACTCCCGGAGGGACTTCACGTTCAACAAGGATGGC  
TTCCGGGACTTCCCGGCCATGGTGCAGGAGCTGCACCAGGGCGGCCGGCGCTACATGATGATCGTGGATC  
CTGCCATCAGCAGCTCGGGCCCTGCCGGGAGCTACAGGCCCTACGACGAGGGTCTGCGGAGGGGGGTTTT

CATCACCAACGAGACCGGCCAGCCGCTGATTGGGAAGGTATGGCCCGGGTCCACTGCCTTCCCCGACTTC  
ACCAACCCACAGCCCTGGCCTGGTGGGAGGACATGGTGGCTGAGTTCCATGACCAGGTGCCCTTCGACG  
GCATGTGGATTGACATGAACGAGCCTTCCAACCTCATCAGGGGCTCTGAGGACGGCTGCCCCAACAATGA  
GCTGGAGAACCCACCCTACGTGCCTGGGGTGGTTGGGGGGACCCTCCAGGCGGCCACCATCTGTGCCTCC  
AGCCACCAGTTTCTCTCCACACACTACAACCTGCACAACCTCTACGGCCTGACCGAAGCCATCGCCTCCC  
ACAGGGCGCTGGTGAAGGCTCGGGGGACACGCCCATTGTGATCTCCCGCTCGACCTTTGCTGGCCACGG  
CCGATACGCCGGCCACTGGACGGGGGACGTGTGGAGCTCCTGGGAGCAGCTCGCCTCCTCCGTGCCAGAA  
ATCCTGCAGTTTAACCTGCTGGGGGTGCCTCTGGTCGGGGCCGACGTCTGCGGCTTCTGGGCAACACCT  
CAGAGGAGCTGTGTGTGCGCTGGACCCAGCTGGGGGCCTTCTACCCCTTCATGCGGAACCACAACAGCCT  
GCTCAGTCTGCCCCAGGAGCCGTACAGCTTCAGCGAGCCGGCCCCAGCAGGCCATGAGGAAGGCCCTCACC  
CTGCGCTACGCACTCCTCCCCACCTCTACACACTGTTCCACCAGGCCACGTGCGGGGGAGACCGTGG  
CCCGGCCCTCTTCTGGAGTTCCCAAGGACTCTAGCACCTGGACTGTGGACCACCAGCTCCTGTGGGG  
GGAGGCCCTGCTCATCACCCAGTGCTCCAGGCCGGAAGGCCGAAGTGACTGGCTACTTCCCCTTGGGC  
ACATGGTACGACCTGCAGACGGTGCCAGTAGAGGCCCTTGGCAGCCTCCCACCCCCACCTGCAGCTCCCC  
GTGAGCCAGCCATCCACAGCGAGGGGCAGTGGGTGACGCTGCCGGCCCCCTGGACACCATCAACGTCCA  
CCTCCGGGCTGGGTACATCATCCCCCTGCAGGGCCCTGGCCTACAACCACAGAGTCCCGCCAGCAGCCC  
ATGGCCCTGGCTGTGGCCCTGACCAAGGGTGGGGAGGCCCGAGGGGAGCTGTTCTGGGACGATGGAGAGA  
GCCTGGAAGTGCTGGAGCGAGGGGCCTACACACAGGTCATCTTCTGGCCAGGAATAACACGATCGTGAA  
TGAGCTGGTACGTGTGACCAGTGAGGGAGCTGGCCTGCAGCTGCAGAAGGTGACTGTCCTGGGCGTGGCC  
ACGGCGCCCCAGCAGGTCCTCTCCAACGGTGTCCCTGTCTCCAACCTCACCTACAGCCCCGACACCAAGG  
TCCTGGACATCTGTGTCTCGCTGTTGATGGGAGAGCAGTTTCTCGTCAGCTGGTGTTAG

>lcl|NM\_007278.2\_cds\_NP\_009209.1\_1 [gene=GABARAP] [db\_xref=CCDS:CCDS11092.1]  
[protein=gamma-aminobutyric acid receptor-associated protein] [protein\_id=NP\_009209.1]  
[location=120..473] [gbkey=CDS]

ATGAAGTTCGTGTACAAAGAAGAGCATCCGTTGAGAAGCGCCGCTCTGAGGGCGAGAAGATCCGAAAGA  
AATACCCGGACCGGGTGCCGGTGATAGTAGAAAAGGCTCCCAAAGCTCGGATAGGAGACCTGGACAAAAA  
GAAATACCTGGTGCCTTCTGATCTCACAGTTGGTCAGTTCTACTTCTTGATCCGGAAGCGAATTCATCTC  
CGAGCTGAGGATGCCTTGTTTTCTTTGTCAACAATGTCATTCCACCCACCAGTGCCACAATGGGTCAGC  
TGTACCAGGAACACCATGAAGAAGACTTCTTTCTCTACATTGCCTACAGTGACGAAAGTGTCTACGGTCT  
GTGA

>lcl|NM\_001363598.2\_cds\_NP\_001350527.1\_1 [gene=GABARAPL1] [db\_xref=CCDS:CCDS86280.1]  
[protein=gamma-aminobutyric acid receptor-associated protein-like 1 isoform 1]  
[protein\_id=NP\_001350527.1] [location=254..694] [gbkey=CDS]

ATGAAGTTCAGTACAAGGAGGACCATCCCTTTGAGTATCGGAAAAAGGAAGGAGAAAAGATCCGGAAGA  
AATATCCGGACAGGGTCCCCGTGATTGTAGAGAAGGCTCCAAAAGCCAGGGTGCCTGATCTGGACAAGAG  
GAAGTACCTAGTGCCCTCTGACCTTACTGTTGGCCAGTTCTACTTCTTAATCCGGAAGAGAATCCACCTG  
AGACCTGAGGACGCCTTATTCTTCTTTGTCAACAACACCATCCCTCCCACCAGTGCTACCATGGGCCAAC  
TGTATGAGGTAATGGTTCTGGTTGCACAATACTGGATGCCGTCCAGTGCAGTCTGGCATCCTCTAGCCCT  
TGTTCTAGATGCGTTGATAACACATCTGAGAAGTGGGGCAGAAGGTGTTATTTATCCGGATCCTCTTACA  
TATGGCAGTGTAAGGCTCTGA

>|cl|NM\_007285.7\_cds\_NP\_009216.1\_1 [gene=GABARAPL2] [db\_xref=CCDS:CCDS10921.1]  
[protein=gamma-aminobutyric acid receptor-associated protein-like 2] [protein\_id=NP\_009216.1]  
[location=109..462] [gbkey=CDS]

ATGAAGTGGATGTTCAAGGAGGACCACTCGCTGGAACACAGATGCGTGGAGTCCGCGAAGATTCGAGCGA  
AATATCCCGACAGGGTTCCGGTGATTGTGGAAAAGGTCTCAGGCTCTCAGATTGTTGACATTGACAAACG  
GAAGTACTTGTTCCATCTGATATCACTGTGGCTCAGTTCATGTGGATCATCAGGAAAAGGATCCAGCTT  
CCTTCTGAAAAGGCGATCTTCCTGTTTGTGGATAAGACAGTCCCACAGTCCAGCCTAACTATGGGACAGC  
TTTACGAGAAGGAAAAAGATGAAGATGGATTCTTATATGTGGCCTACAGCGGAGAGAACTTTTGGCTT  
CTGA

>|cl|NM\_002046.7\_cds\_NP\_002037.2\_1 [gene=GAPDH] [db\_xref=CCDS:CCDS8549.1]  
[protein=glyceraldehyde-3-phosphate dehydrogenase isoform 1] [protein\_id=NP\_002037.2]  
[location=77..1084] [gbkey=CDS]

ATGGGGAAGGTGAAGGTCGGAGTCAACGGATTTGGTCGTATTGGGCGCCTGGTCACCAGGGCTGCTTTTA  
ACTCTGGTAAAGTGGATATTGTTGCCATCAATGACCCCTTCATTGACCTCAACTACATGGTTTACATGTT  
CCAATATGATTCCACCCATGGCAAATTCCATGGCACCGTCAAGGCTGAGAACGGGAAGCTTGTCATCAAT  
GGAAATCCCATCACCATCTTCCAGGAGCGAGATCCCTCCAAAATCAAGTGGGGCGATGCTGGCGCTGAGT  
ACGTCGTGGAGTCCACTGGCGTCTTACCACCATGGAGAAGGCTGGGGCTCATTTGCAGGGGGGAGCCAA  
AAGGGTCATCATCTCTGCCCCCTCTGCTGATGCCCCCATGTTTCGTTCATGGGTGTGAACCATGAGAAGTAT  
GACAACAGCCTCAAGATCATCAGCAATGCCTCCTGCACCACCAACTGCTTAGCACCCCTGGCCAAGGTCA  
TCCATGACAACCTTGGTATCGTGGAAGGACTCATGACCACAGTCCATGCCATCACTGCCACCCAGAAGAC  
TGTGGATGGCCCCTCCGGGAAACTGTGGCGTGATGGCCGCGGGGCTCTCCAGAACATCATCCCTGCCTCT  
ACTGGCGCTGCCAAGGCTGTGGGCAAGGTCATCCCTGAGCTGAACGGGAAGCTCACTGGCATGGCCTTCC  
GTGTCCCCACTGCCAACGTGTCAAGTGGTGGACCTGACCTGCCGTCTAGAAAAACCTGCCAAATATGATGA

CATCAAGAAGGTGGTGAAGCAGGCGTCGGAGGGCCCCCTCAAGGGCATCCTGGGCTACACTGAGCACCAG  
GTGGTCTCCTCTGACTTCAACAGCGACACCCACTCCTCCACCTTTGACGCTGGGGCTGGCATTGCCCTCA  
ACGACCACTTTGTCAAGCTCATTTCTGGTATGACAACGAATTTGGCTACAGCAACAGGGTGGTGGACCT  
CATGGCCCACATGGCCTCCAAGGAGTAA

>|cl|NM\_006496.4\_cds\_NP\_006487.1\_1 [gene=GNAI3] [db\_xref=CCDS:CCDS802.1] [protein=guanine  
nucleotide-binding protein G(i) subunit alpha-3] [protein\_id=NP\_006487.1] [location=107..1171]  
[gbkey=CDS]

ATGGGCTGCACGTTGAGCGCCGAAGACAAGGCGGCAGTGGAGCGAAGCAAGATGATCGACCGCAACTTAC  
GGGAGGACGGGGAAAAAGCGGCCAAAGAAGTGAAGCTGCTGCTACTCGGTGCTGGAGAATCTGGTAAAAG  
CACCATTGTGAAACAGATGAAAATCATTGATGAGGATGGCTATTCAGAGGATGAATGTAAACAATATAAA  
GTAGTTGTCTACAGCAATACTATACAGTCCATCATTGCAATCATAAGAGCCATGGGACGGCTAAAGATTG  
ACTTTGGGGAAGCTGCCAGGGCAGATGATGCCCGGCAATTATTTGTTTTAGCTGGCAGTGCTGAAGAAGG  
AGTCATGACTCCAGAACTAGCAGGAGTGATTAAACGGTTATGGCGAGATGGTGGGGTACAAGCTTGCTTC  
AGCAGATCCAGGGAATATCAGCTCAATGATTCTGCTTCATATTATCTAAATGATCTGGATAGAATATCCC  
AGTCTAACTACATTCCAACCTCAGCAAGATGTTCTTCGGACGAGAGTGAAGACCACAGGCATTGTAGAAAC  
ACATTTACCTTCAAAGACCTATACTTCAAGATGTTTGATGTAGGTGGCCAAAGATCAGAACGAAAAAAG  
TGGATTCACTGTTTTGAGGGAGTGACAGCAATTATCTTCTGTGTGGCCCTCAGTGATTATGACCTTGTTT  
TGGCTGAGGACGAGGAGATGAACCGAATGCATGAAAGCATGAACTGTTTGACAGCATTTGTAATAACAA  
ATGGTTTACAGAACTTCAATCATTCTCTTCTTAACAAGAAAGACCTTTTTGAGGAAAAAATAAAGAGG  
AGTCCGTAACTATCTGTTATCCAGAATACACAGGTTCCAATACATATGAAGAGGCAGCTGCCTATATTC  
AATGCCAGTTTGAAGATCTGAACAGAAGAAAAGATACCAAGGAGATCTATACTCACTTCACCTGTGCCAC  
AGACACGAAGAATGTGCAGTTTGTGTTTTGATGCTGTTACAGATGTCATCATTAATAAACAACCTAAAGGAA

TGTGGACTTTATTGA

>|cl|NM\_020399.4\_cds\_NP\_065132.1\_1 [gene=GOPC] [db\_xref=CCDS:CCDS5117.1] [protein=Golgi-associated PDZ and coiled-coil motif-containing protein isoform a] [protein\_id=NP\_065132.1] [location=224..1612] [gbkey=CDS]

ATGTCGGCGGGCGGTCCATGCCCAGCAGCAGCCGGAGGGGGCCAGGGGGCGCCTCCTGCTCCGTGGGGG  
CCCCTGGCGGGGTATCCATGTTCCGGTGGCTGGAGGTGCTGGAGAAGGAGTTCGACAAAGCTTTTGTGGA  
TGTGGATCTGCTCCTGGGAGAGATCGATCCAGACCAAGCGGACATCACTTATGAGGGGCGACAGAAGATG  
ACCAGCCTGAGCTCCTGCTTTGCACAGCTTTGCCACAAAGCCAGTCTGTGTCTCAAATCAACCACAAGC  
TGGAGGCACAGTTGGTGGATCTGAAATCTGAACTGACAGAAACCCAAGCAGAGAAAGTTGTTTTGGAGAA  
AGAAGTACATGATCAGCTTTTACAGCTGCACTCTATTCAGCTGCAGCTTCATGCTAAACTGGTCAAAGT  
GCTGACTCTGGTACCATTAAGGCAAAATTGTCTGGCCCCTCTGTGGAGGAGCTGGAAAGAGAGCTTGAGG  
CAAACAAAAAAGAAAAAATGAAAGAAGCACAACTTGAAGCTGAAGTGAAATTGTTGAGAAAAGAGAATGA  
AGCCCTTCGTAGACATATAGCTGTTCTCCAGGCTGAAGTATATGGGGCGAGACTAGCTGCCAAGTACTTG  
GATAAGGAACTGGCAGGAAGGGTCCAACAGATACAATTGCTAGGACGAGATATGAAGGGACCTGCTCATG  
ATAAGCTTTGGAACCAATTAGAAGCTGAAATACATTTGCATCGTCACAAAACCTGTGATCCGAGCCTGCAG  
AGGACGTAATGACTTGAAACGACCAATGCAAGCACCACCAGGCCATGATCAAGATTCCTAAAGAAAAGC  
CAAGGTGTTGGTCCAATTAGAAAAGTTCTCCTCCTTAAGGAAGATCATGAAGGCCTTGGCATTTCATTA  
CAGGTGGGAAAGAACATGGTGTCCAATCCTCATCTCTGAGATCCATCCGGGGCAACCTGCTGATAGATG  
CGGAGGGCTGCACGTTGGGGATGCTATTTTGGCAGTCAACGGAGTTAACCTAAGGGACACAAAGCATAAA  
GAAGCTGTAACATTTCTTCTCAGCAGAGAGGAGAGATTGAATTTGAAGTAGTTTATGTGGCTCCTGAAG  
TGGATTCTGATGATGAAAACGTAGAGTATGAAGATGAGAGTGGACATCGTTACCGTTTGTACCTTGATGA  
GTTAGAAGGAGGTGGTAACCCTGGTGTAGTTGCAAAGACACAAGTGGGGAAATCAAAGTATTACAAGGA

TTTAATAAGAAGGCAGTAACTGACACACATGAAAATGGAGACCTGGGCACTGCAAGTGAAACTCCGCTAG  
ATGACGGTGCTTCAAAATTAGATGATCTGCACACTCTGTATCATAAAAAATCTTATTAA

>|NM\_017551.3\_cds\_NP\_060021.1\_1 [gene=GRID1] [db\_xref=CCDS:CCDS31236.1]  
[protein=glutamate receptor ionotropic, delta-1 precursor] [protein\_id=NP\_060021.1]  
[location=404..3433] [gbkey=CDS]

ATGGAAGCGCTGACGCTGTGGCTTCTCCCTGGATATGCCAGTGCGTGTGCGTGCGGGCCGACTCCATCA  
TCCACATCGGTGCCATCTTCGAGGAGAACGCGGCCAAGGACGACAGGGTGTTCCAGTTGGCGGTATCCGA  
CCTGAGCCTCAACGATGACATCCTGCAGAGCGAGAAGATCACCTACTCCATCAAGGTCATCGAGGCCAAC  
AACCCATTCCAGGCTGTGCAGGAAGCCTGTGACCTCATGACCCAGGGGATTTTGGCCTTGGTCACGTCCA  
CTGGCTGTGCATCTGCCAATGCCCTGCAGTCCCTCACGGATGCCATGCACATCCCACACCTCTTTGTCCA  
GCGCAACCCGGGAGGGTCGCCACGCACCGCATGCCACCTGAACCCAGCCCCGATGGTGAGGCCTACACA  
CTGGCTTCGAGACCACCCGTCCGCCTCAATGATGTCATGCTCAGGCTGGTGACGGAGCTGCGCTGGCAGA  
AGTTCGTCATGTTCTACGACAGCGAGTATGATATCCGTGGGCTTCAAAGCTTCTGGACCAGGCCTCGCG  
GCTGGGCCTTGACGTCTCTTTACAAAAGGTGGACAAGAACATTAGCCACGTATTCACCAGCCTCTTCACC  
ACGATGAAGACAGAGGAGCTGAATCGCTACCGGGACACGCTTCGCCGCGCCATCCTGCTGCTCAGCCCAC  
AGGGAGCCCCACTCCTTCATCAACGAGGCCGTGGAGACCAACCTGGCTTCCAAGGACAGCCACTGGGTCTT  
TGTGAATGAGGAAATCAGTGACCCGGAGATCCTGGATCTGGTCCATAGTGCCCTTGGAAGGATGACCGTG  
GTCCGGCAAATCTTCCGTCTGCAAAGGACAATCAGAAATGCACGAGGAACAACACCGCATCTCCTCCC  
TGCTCTGCGACCCCCAGGAAGGCTACCTCCAGATGCTGCAGATCTCAAACCTCTATCTGTATGACAGTGT  
TCTGATGCTGGCCAACGCCTTTCACAGGAAGCTGGAGGACCGGAAGTGGCATAGCATGGCGAGCCTCAAC  
TGCATACGGAAATCCACTAAGCCATGGAATGGTGGGAGGTCCATGCTGGATACCATCAAAAAGGGCCACA  
TCACTGGCCTCACTGGGGTGATGGAGTTTCGGGAGGACAGTTCGAATCCCTATGTCCAGTTTGAAATCCT

TGGCACTACCTATAGTGAGACTTTTGGCAAAGACATGCGCAAGTTGGCGACATGGGACTCAGAGAAGGGC  
TTGAATGGCAGCTTGCAAGAGAGGCCCATGGGCAGCCGCCTCCAAGGATTGACTCTTAAAGTGGTGACTG  
TCTTGGAAGAGCCTTTCGTGATGGTGGCTGAGAACATCCTAGGACAGCCCAAGCGCTACAAAGGGTTCTC  
CATAGATGTCCTGGATGCACTGGCCAAGGCTCTGGGCTTTAAATATGAGATTTACCAAGCCCCTGATGGC  
AGGTACGGTCACCAGCTCCATAACACCTCCTGGAACGGGATGATCGGGGAGCTCATCAGCAAGAGAGCAG  
ACTTGGCCATCTCTGCCATCACCATCACCCAGAGAGGGAGAGCGTTGTGGACTTCAGCAAGCGGTACAT  
GGACTATTCAGTGGGGATTCTAATTAAGAAGCCCCGAGGAGAAAATCAGCATCTTCTCCCTCTTGCTCCA  
TTTGATTTGCTGTGTGGGCCTGCATTGCAGCAGCCATCCCTGTGGTTGGTGTGCTGATATTTGTGTTGA  
ACAGGATACAGGCTGTGAGGGCTCAGAGTGCTGCCAGCCCAGGCCGTCAGCTTCTGCCACTCTGCACAG  
CGCCATCTGGATTGTCTATGGAGCCTTCGTACAGCAAGGTGGCGAATCTTCCGTGAACCTCATGGCCATG  
CGCATCGTGATGGGCAGCTGGTGGCTCTTCACGCTCATTGTGTGCTCCTCCTACACAGCCAACCTTGCTG  
CCTCCTCACAGTGTCAGGATGGACAACCCCATAGGACTTTCCAGGACCTGTCCAAACAAGTGGAAT  
GTCTTATGGCACTGTCCGGGATTCTGCTGTATATGAGTACTTCCGAGCCAAGGGCACCAACCCCTGGAG  
CAGGACAGCACGTTTGCTGAACTCTGGCGGACCATCAGCAAGAACGGAGGGGCTGACAACTGCGTGTCCA  
GTCCTTCAGAAGGCATCAGGAAGGCAAAGAAGGGGAACCTACGCCTTCCTGTGGGATGTGGCCGTGGTGGA  
ATACGCAGCCCTGACGGATGACGACTGCTCGGTGACTGTCATCGGCAACAGCATCAGCAGCAAGGGTTAC  
GGGATTGCCCTGCAGCATGGCAGCCCCTACAGGGACCTCTTCTCCAGAGGATCCTGGAGCTGCAGGACA  
CAGGGGACCTGGATGTGCTGAAGCAGAAGTGGTGGCCGCACATGGGCCGCTGTGACCTCACCAGCCATGC  
CAGCGCCCAGGCCGACGGCAAATCCCTCAAGCTGCACAGCTTCGCCGGGGTCTTCTGCATCCTGGCCATT  
GGCCTGCTCCTGGCCTGCCTGGTGGCTGCCCTGGAGTTGTGGTGGAACAGCAACCGGTGCCACCAGGAGA  
CCCCAAGGAGGACAAAGAAGTGAACCTGGAGCAGGTCCACCGGCGCATGAACAGCCTCATGGATGAAGA  
CATTGCTCACAAGCAGATTTCCCAGCGTCGATTGAGCTCTCGGCCCTGGAGATGGGGGGCCTGGCTCCC  
ACCCAGACCTTGGAGCCGACACGGGAGTACCAGAACACCCAGCTCTCGGTGAGCACCTTTCTGCCAGAGC  
AGAGCAGCCATGGCACCAGCCGGACACTCTCATCAGGGCCCAGCAGCAACCTGCCGCTGCCGCTGAGCAG  
CTCGGCGACCATGCCCTCCATGCAGTGCAAACACAGGTCACCCAACGGGGGGCTGTTCCGGCAGAGCCCCG

GTGAAGACCCCATCCCATGTCCTTCCAGCCCGTGCCTGGAGGCGTCCTTCCAGAGGCTCTGGACACCT  
CCCACGGGACCTCCATCTGA

>|cl|NM\_001286838.1\_cds\_NP\_001273767.1\_1 [gene=GRID2] [db\_xref=CCDS:CCDS68758.1]  
[protein=glutamate receptor ionotropic, delta-2 isoform 2 precursor] [protein\_id=NP\_001273767.1]  
[location=259..2997] [gbkey=CDS]

ATGGAAGTTTTCCCCTTTCTCTTGGTTTTGTCCGTCTGGTGGTCTCGAACCTGGGACTCGGCGAATGCGG  
ATTCGATCATTACATCGGAGCAATTTTTGATGAATCTGCCAAAAGGATGATGAGGTATTCGCACTGC  
GGTTGGTGACCTTAACCAGAATGAGGAGATCTTACAGACTGAGAAAATCACATTTTCAGTGACGTTTGTT  
GATGGCAACAACCCTTTCCAAGCAGTTCAAGAAGATATCCGTGGAATACAGGAGTTCTTGGACAAAGTCT  
CTCAGCAGGGAATGGATGTTGCACTTCAGAAGGTAGAAAACAACATCAATAAAATGATTACCACTCTCTT  
TGACACCATGAGAATAGAAGAACTGAATCGCTATCGAGACACTCTTAGGCGAGCGATCCTTGTTATGAAT  
CCTGCTACAGCCAAATCCTTCATTACTGAGGTTGTGGAGACTAATTTGGTTGCTTTTGA CTGCTACTGGA  
TCATTATAAATGAGGAAATAAACGATGTGGACGTACAGGAACCTTGTAAGAAGGTCAATTGGAAGGTAAAC  
GATTATTCGGCAGACATTTCCAGTTCCCCAGAACATAAGTCAGCGGTGTTTCCGTGGCAACCATCGAATA  
TCTTCAACATTGTGTGATCCAAAGGATCCATTTGCTCAGAATATGGAGATTTCCAACCTTTACATATATG  
ACACGGTGCTTCTGCTTGCTAATGCTTTTCATAAGAAGCTGGAGGACCGAAAGTGGCACAGCATGGCAAG  
TCTGTCATGTATCAGAAAGAACTCAAAGCCCTGGCAGGGTGGGCGCTCCATGTTGGAGACCATCAAGAAG  
GGTGGAGTTAGTGGGTTGACTGGAGAGCTAGAATTTGGAGAAAATGGAGGCAATCCCAATGTCCACTTTG  
AAATCCTTGAACCAACTATGGAGAAGAGCTTGGCAGAGGTGTTGAAAACCTGGTTGCTGGAATCCTGT  
CACAGGTCTGAATGGGTCACTGACTGACAAGAAATTGGAGAATAACATGCGTGGAGTGTTCTACGTGTA  
GTA ACTGTTCTGGAAGAACCTTTTGTGATGGTCTCTGAAAATGTCTTGGGTAAGCCGAAGAAATACCAGG  
GCTTCTCCATTGATGTTTTGGATGCCTTATCTAACTACCTGGGTTTTAACTACGAAATTTACGTAGCACC

GGATCACAAATACGGAAGCCCACAAGAAGATGGGACATGGAATGGCTTGGTAGGAGAACTTGTCTTTAAG  
AGAGCCGACATAGGGATTTCTGCTTTAACCATCACTCCAGATCGTGAAAATGTGGTGGACTTTACGACAC  
GTTACATGGACTACTCAGTGGGGGTACTACTTCGAAGGGCTGAAAAGACAGTGGATATGTTTGCCTGTCT  
TGCACCATTTGATCTCTCTCTATGGGCTTGCATTGCTGGCACAGTCCTTCTGGTGGGTCTACTGGTCTAC  
CTCTTGAACTGGCTTAATCCCCCAGATTACAAATGGGATCAATGACGTCTACTACTCTCTACAACCTCA  
TGTGGTTTGTGTATGGATCTTTTGTACAACAAGGCGGGGAAGTCCCGTACACGACTCTGGCTACCCGAAT  
GATGATGGGGGCTTGGTGGCTATTTGCTTTGATTGTTATCTCATCTTACACGGCAAACCTCGCTGCTTTC  
CTCACTATTACACGCATTGAAAGTTCCATCCAGTCTCTCCAGGACCTTTCCAAGCAAACAGAAATCCCTT  
ATGGCACAGTCCTAGACTCTGCGGTATATGAGCATGTCCGCATGAAAGGACTGAATCCTTTTGAGAGGGA  
CAGCATGTATTCCCAAATGTGGCGGATGATCAACCGAAGCAATGGATCGGAGAACAATGTTCTGGAGTCC  
CAGGCAGGCATTCAAAAGGTAAATATGGAAATTATGCTTTCGTATGGGATGCAGCTGTATTGGAATATG  
TGGCTATCAATGACCCAGATTGTTCCCTTTTACACCATTGGAAATACTGTTGCTGATCGGGGATATGGAAT  
TGCATTACAACATGGCAGTCCTTACCGAGATGTTTTTTCACAAAGGATCCTGGAGCTTCAGCAGAATGGT  
GACATGGACATCCTGAAGCACAAATGGTGGCCTAAGAATGGCCAGTGTGACCTGTACTCGTCAGTGGACA  
CAAAGCAGAAAGGAGGCGCCCTGGACATAAAGAGCTTTCAGGGGTCTTTTGTATCCTGGCTGCTGGAAT  
TGTCTCTCCTGCTTCATAGCCATGCTGGAGACGTGGTGGAACAAGAGGAAAGGCTCCCGGGTTCCATCA  
AAAGAGGATGACAAGGAAATTGACCTGGAGCACCTCCATAGACGTGTAAATAGCTTGTGCACAGATGACG  
ACAGCCCCCATAAACAGTTTTCCACCTCGTCAATTGATTTGACCCCTCTGGACATTGACACTTTGCCAAC  
ACGACAAGCACTGGAGCAAATCAGTGATTTTCAGGAACACTCATATTACCACAACAACCTTTATCCCAGAG  
CAGATCCAGACTCTTAGCCGCACACTGTCAGCTAAAGCTGCTTCTGGTTTCACTTTTGGCAACGTGCCTG  
AGCACCGAACTGGCCCTTTTAGGCACAGGGCACCTAATGGGGGCTTTTTCAGGAGTCCTATAAAAAACAAT  
GTCATCTATTCCTTATCAACCAACTCCTACCCTGGGGCTCAATCTGGGTAATGATCCAGACCGAGGCACC  
TCCATATGA

>|cl|NM\_004964.3\_cds\_NP\_004955.2\_1 [gene=HDAC1] [db\_xref=CCDS:CCDS360.1] [protein=histone deacetylase 1] [protein\_id=NP\_004955.2] [location=88..1536] [gbkey=CDS]

ATGGCGCAGACGCAGGGCACCCGGAGGAAAGTCTGTTACTACTACGACGGGGATGTTGGAAATTACTATT  
ATGGACAAGGCCACCCAATGAAGCCTCACCGAATCCGCATGACTCATAATTTGCTGCTCAACTATGGTCT  
CTACCGAAAAATGGAAATCTATCGCCCTCACAAAGCCAATGCTGAGGAGATGACCAAGTACCACAGCGAT  
GACTACATTAAATTCTTGCGCTCCATCCGTCCAGATAACATGTCGGAGTACAGCAAGCAGATGCAGAGAT  
TCAACGTTGGTGAGGACTGTCCAGTATTCGATGGCCTGTTTGAGTTCTGTCAGTTGTCTACTGGTGGTTC  
TGTGGCAAGTGCTGTGAACTTAATAAGCAGCAGACGGACATCGCTGTGAATTGGGCTGGGGGCTGCAC  
CATGCAAAGAAGTCCGAGGCATCTGGCTTCTGTTACGTCAATGATATCGTCTTGGCCATCCTGGAAGTGC  
TAAAGTATCACCAGAGGGTGCTGTACATTGACATTGATATTCACCATGGTGACGGCGTGGAAGAGGCCTT  
CTACACCACGGACCGGGTCATGACTGTGTCCTTTCATAAGTATGGAGAGTACTTCCCAGGAACTGGGGAC  
CTACGGGATATCGGGGCTGGCAAAGGCAAGTATTATGCTGTAACTACCCGCTCCGAGACGGGATTGATG  
ACGAGTCCTATGAGGCCATTTTCAAGCCGGTCATGTCCAAAGTAATGGAGATGTTCCAGCCTAGTGCGGT  
GGTCTTACAGTGTGGCTCAGACTCCCTATCTGGGGATCGGTTAGGTTGCTTCAATCTAACTATCAAAGGA  
CACGCCAAGTGTGTGGAATTTGTCAAGAGCTTTAACCTGCCTATGCTGATGCTGGGAGGCGGTGGTTACA  
CCATTCGTAACGTTGCCCGGTGCTGGACATATGAGACAGCTGTGGCCCTGGATACGGAGATCCCTAATGA  
GCTTCCATACAATGACTACTTTGAATACTTTGGACCAGATTTCAAGCTCCACATCAGTCCTTCCAATATG  
ACTAACCAGAACACGAATGAGTACCTGGAGAAGATCAAACAGCGACTGTTTGAGAACCTTAGAATGCTGC  
CGCACGCACCTGGGGTCCAAATGCAGGCGATTCTGAGGACGCCATCCCTGAGGAGAGTGGCGATGAGGA  
CGAAGACGACCCTGACAAGCGCATCTCGATCTGCTCCTCTGACAAACGAATTGCCTGTGAGGAAGAGTTC  
TCCGATTCTGAAGAGGAGGGAGAGGGGGGCCGCAAGAACTCTTCCAACCTCAAAAAAGCCAAGAGAGTCA  
AAACAGAGGATGAAAAAGAGAAAGACCCAGAGGAGAAGAAAGAAGTCACCGAAGAGGAGAAAACCAAGGA  
GGAGAAGCCAGAAGCCAAAGGGGTCAAGGAGGAGGTCAAGTTGCCTGA

>|c| NM\_006044.4\_cds\_NP\_006035.2\_1 [gene=HDAC6] [db\_xref=CCDS:CCDS14306.1] [protein=histone deacetylase 6 isoform b] [protein\_id=NP\_006035.2] [location=107..3754] [gbkey=CDS]

ATGACCTCAACCGGCCAGGATTCCACCACAACCAGGCAGCGAAGAAGTAGGCAGAACCCCCAGTCGCCCC  
CTCAGGACTCCAGTGTCACTTCGAAGCGAAATATTA AAAAGGGAGCCGTTCCCCGCTCTATCCCCAATCT  
AGCGGAGGTAAAGAAGAAAGGCAAAATGAAGAAGCTCGGCCAAGCAATGGAAGAAGACCTAATCGTG GGA  
CTGCAAGGGATGGATCTGAACCTTGAGGCTGAAGCACTGGCTGGCACTGGCTTGGTGTGGATGAGCAGT  
TAAATGAATTCCATTGCCTCTGGGATGACAGCTTCCCGGAAGGCCCTGAGCGGCTCCATGCCATCAAGGA  
GCAACTGATCCAGGAGGGCCTCCTAGATCGCTGCGTGTCTTTCAGGCCCGGTTTGCTGAAAAGGAAGAG  
CTGATGTTGGTTCACAGCCTAGAATATATTGATCTGATGGAAACAACCCAGTACATGAATGAGGGAGAAC  
TCCGTGTCCTAGCAGACACCTACGACTCAGTTTATCTGCATCCGAACTCATACTCCTGTGCCTGCCTGGC  
CTCAGGCTCTGTCTCAGGCTGGTGGATGCGGTCCTGGGGGCTGAGATCCGGAATGGCATGGCCATCATT  
AGGCCTCCTGGACATCACGCCCAGCACAGTCTTATGGATGGCTATTGCATGTTCAACCACGTGGCTGTGG  
CAGCCCGCTATGCTCAACAGAAACACCGCATCCGGAGGGTCCTTATCGTAGATTGGGATGTGCACCACGG  
TCAAGGAACACAGTTCACCTTCGACCAGGACCCCACTGTCCTCTATTTCTCCATCCACCGCTACGAGCAG  
GGTAGGTTCTGGCCCCACCTGAAGGCCTCTAACTGGTCCACCACAGGTTTCGGCCAAGGCCAAGGATATA  
CCATCAATGTGCCTTGGAACCAGGTGGGGATGCGGGATGCTGACTACATTGCTGCTTTCTGCACGTCCT  
GCTGCCAGTCGCCCTCGAGTTCCAGCCTCAGCTGGTCCTGGTGGCTGCTGGATTTGATGCCCTGCAAGGG  
GACCCCAAGGGTGAGATGGCCGCCACTCCGGCAGGGTTGCGCCAGCTAACCACCTGCTCATGGGTCTGG  
CAGGAGGCAAGCTGATCCTGTCTCTGGAGGGTGGCTACAACCTCCGCGCCCTGGCTGAAGGCGTCAGTGC  
TTCGCTCCACACCCTTCTGGGAGACCCTTGCCCCATGCTGGAGTCACCTGGTGCCCCCTGCCGGAGTGCC  
CAGGCTTCAGTTTCCTGTGCTCTGGAAGCCCTTGAGCCCTTCTGGGAGGTTCTTGTGAGATCAACTGAGA  
CCGTGGAGAGGGACAACATGGAGGAGGACAATGTAGAGGAGAGCGAGGAGGAAGGACCCTGGGAGCCCCC  
TGTGCTCCCAATCCTGACATGGCCAGTGCTACAGTCTCGCACAGGGCTGGTCTATGACCAAAATATGATG

AATCACTGCAACTTGTGGGACAGCCACCACCCTGAGGTACCCAGCGCATCTTGCGGATCATGTGCCGTC  
TGGAGGAGCTGGGCCTTGCCGGGCGCTGCCTCACCTGACACCGCGCCCTGCCACAGAGGCTGAGCTGCT  
CACCTGTCACAGTGCTGAGTACGTGGGTCTATCTCCGGGCCACAGAGAAAATGAAAACCCGGGAGCTGCAC  
CGTGAGAGTTCCAACCTTGACTCCATCTATATCTGCCCCAGTACCTTCGCCTGTGCACAGCTTGCCACTG  
GCGCTGCCTGCCGCTGGTGGAGGCTGTGCTCTCAGGAGAGGTTCTGAATGGTGCTGCTGTGGTGCGTCC  
CCCAGGACACCACGCAGAGCAGGATGCAGCTTGCGGTTTTTGCTTTTTCAACTCTGTGGCTGTGGCTGCT  
CGCCATGCCCAGACTATCAGTGGGCATGCCCTACGGATCCTGATTGTGGATTGGGATGTCCACCACGGTA  
ATGGAACCTCAGCACATGTTTGAGGATGACCCAGTGTGCTATATGTGTCCCTGCACCGCTATGATCATGG  
CACCTTCTTCCCCATGGGGGATGAGGGTGCCAGCAGCCAGATCGGCCGGGCTGCGGGCACAGGCTTCACC  
GTCAACGTGGCATGGAACGGGCCCCGCATGGGTGATGCTGACTACCTAGCTGCCTGGCATCGCCTGGTG  
TTCCATTGCCTACGAGTTTAACCCAGAACTGGTGCTGGTCTCAGCTGGCTTTGATGCTGCACGGGGGGA  
TCCGCTGGGGGGCTGCCAGGTGTCACCTGAGGGTTATGCCACCTCACCCACCTGCTGATGGGCCTTGCC  
AGTGGCCGCATTATCCTTATCCTAGAGGGTGGCTATAACCTGACATCCATCTCAGAGTCCATGGCTGCCT  
GCACTCGCTCCCTCCTTGAGACCCACCACCCCTGCTGACCCTGCCACGGCCCCCACTATCAGGGGCCCT  
GGCCTCAATCACTGAGACCATCCAAGTCCATCGCAGATACTGGCGCAGCTTACGGGTCTGAAGGTAGAA  
GACAGAGAAGGACCCTCCAGTTCTAAGTTGGTCACCAAGAAGGCACCCCAACCAGCCAAACCTAGGTTAG  
CTGAGCGGATGACCACACGAGAAAAGAAGTTCTGGAAGCAGGCATGGGGAAAGTCACCTCGGCATCATT  
TGGGGAAGAGTCCACTCCAGGCCAGACTAACTCAGAGACAGCTGTGGTGGCCCTCACTCAGGACCAGCCC  
TCAGAGGCAGCCACAGGGGGAGCCACTCTGGCCAGACCATTTCTGAGGCAGCCATTGGGGGAGCCATGC  
TGGGCCAGACCACCTCAGAGGAGGCTGTCGGGGGAGCCACTCCGGACCAGACCACCTCAGAGGAGACTGT  
GGGAGGAGCCATTCTGGACCAGACCACCTCAGAGGATGCTGTTGGGGGAGCCACGCTGGGCCAGACTACC  
TCAGAGGAGGCTGTAGGAGGAGCTACACTGGCCAGACCACCTCGGAGGCAGCCATGGAGGGAGCCACAC  
TGGACCAGACTACGTCAGAGGAGGCTCCAGGGGGCACCGAGCTGATCCAAACTCCTCTAGCCTCGAGCAC  
AGACCACCAGACCCCCCAACCTCACCTGTGCAGGGAATAACCCAGATATCTCCAGTACACTGATT  
GGGAGTCTCAGGACCTTGAGCTAGGCAGCGAATCTCAGGGGGCCTCAGAATCTCAGGCCCCAGGAGAGG

AGAACCTACTAGGAGAGGCAGCTGGAGGTCAGGACATGGCTGATTCGATGCTGATGCAGGGATCTAGGGG  
CCTCACTGATCAGGCCATATTTTATGCTGTGACACCACTGCCCTGGTGTCCCCATTTGGTGGCAGTATGC  
CCCATACCTGCAGCAGGCCTAGACGTGACCCAACCTTGTGGGGACTGTGGAACAATCCAAGAGAATTGGG  
TGTGTCTCTTTGCTATCAGGTCTACTGTGGTCGTTACATCAATGGCCACATGCTCCAACACCATGGAAA  
TTCTGGACACCCGCTGGTCCTCAGCTACATCGACCTGTCAGCCTGGTGTACTACTGTCAGGCCTATGTC  
CACCACCAGGCTCTCCTAGATGTGAAGAACATCGCCCACCAGAACAAGTTTGGGGAGGATATGCCCCACC  
CACACTAA

>|cl|NM\_004712.5\_cds\_NP\_004703.1\_1 [gene=HGS] [db\_xref=CCDS:CCDS11784.1] [protein=hepatocyte  
growth factor-regulated tyrosine kinase substrate] [protein\_id=NP\_004703.1] [location=57..2390]  
[gbkey=CDS]

ATGGGGCGAGGCAGCGGCACCTTCGAGCGTCTCCTAGACAAGGCGACCAGCCAGCTCCTGTTGGAGACAG  
ATTGGGAGTCCATTTTGCAGATCTGCGACCTGATCCGCCAAGGGGACACACAAGCAAAATATGCTGTGAA  
TTCCATCAAGAAGAAAGTCAACGACAAGAACCCACACGTCGCCTTGATGCCCTGGAGGTCATGGAATCT  
GTGGTAAAGAACTGTGGCCAGACAGTTCATGATGAGGTGGCCAACAAGCAGACCATGGAGGAGCTGAAGG  
ACCTGCTGAAGAGACAAGTGGAGGTAAACGTCCGTAACAAGATCCTGTACCTGATCCAGGCCTGGGCGCA  
TGCCTTCCGGAACGAGCCCAAGTACAAGGTGGTCCAGGACACCTACCAGATCATGAAGGTGGAGGGGCAC  
GTCTTTCCAGAATTCAAAGAGAGCGATGCCATGTTTGCTGCCGAGAGAGCCCCAGACTGGGTGGACGCTG  
AGGAATGCCACCGCTGCAGGGTGCAGTTCGGGGTGATGACCCGTAAGCACCACTGCCGGGCGTGTGGGCA  
GATATTCTGTGGAAAGTGTCTTCCAAGTACTCCACCATCCCCAAGTTTGGCATCGAGAAGGAGGTGCGC  
GTGTGTGAGCCCTGCTACGAGCAGCTGAACAGGAAAGCGGAGGGAAAGGCCACTTCCACCACTGAGCTGC  
CCCCGAGTACCTGACCAGCCCCCTGTCTCAGCAGTCCCAGCTGCCCCCAAGAGGGACGAGACGGCCCT  
GCAGGAGGAGGAGGAGCTGCAGCTGGCCCTGGCGCTGTCACAGTCAGAGGCGGAGGAGAAGGAGAGGCTG

AGACAGAAGTCCACGTACACTTCGTACCCCAAGGCGGAGCCCATGCCCTCGGCCTCCTCAGCGCCCCCG  
CCAGCAGCCTGTACTCTTCACCTGTGAACTCGTCGGCGCCTCTGGCTGAGGACATCGACCCTGAGCTCGC  
ACGGTATCTCAACCGGAACTACTGGGAGAAGAAGCAGGAGGAGGCTCGCAAGAGCCCCACGCCATCTGCG  
CCCGTGCCCCCTGACGGAGCCGGCTGCACAGCCTGGGGAAGGGCACGCAGCCCCACCAACGTGGTGGAGA  
ACCCCTCCCGGAGACAGACTCTCAGCCCATTCTCCCTCTGGTGGCCCCCTTAGTGAGCCACAGTTCCA  
CAATGGCGAGTCTGAGGAGAGCCACGAGCAGTTCCTGAAGGCGCTGCAGAACGCCGTCACCACCTTCGTG  
AACCGCATGAAGAGTAACCACATGCGGGGCCGAGCATACCAATGACTCGGCCGTGCTCTCACTCTTCC  
AGTCCATCAACGGCATGCACCCGAGCTGCTGGAGCTGCTCAACCAGCTGGACGAGCGCAGGCTGTACTA  
TGAGGGGCTGCAGGACAAGCTGGCACAGATCCGCGATGCCCGGGGGCGCTGAGTGCCCTGCGCGAAGAG  
CACCGGGAGAAGCTTCGCCGGGCGAGCCGAGGAGGCAGAGCGCCAGCGCCAGATCCAGCTGGCCCAGAAGC  
TGGAGATAATGCGGCAGAAGAAGCAGGAGTACCTGGAGGTGCAGAGGCAGCTGGCCATCCAGCGCCTGCA  
GGAGCAGGAGAAGGAGCGGCAGATGCGGCTGGAGCAGCAGAAGCAGACGGTCCAGATGCGCGCGCAGATG  
CCCGCCTTCCCCCTGCCCTACGCCAGCTCCAGGCCATGCCCGCAGCCGGAGGTGTGCTCTACCAGCCCT  
CGGGACCAGCCAGCTTCCCCAGCACCTTCAGCCCTGCCGGCTCGGTGGAGGGCTCCCCAATGCACGGCGT  
GTACATGAGCCAGCCGGCCCCCTGCCGCTGGCCCCCTACCCAGCATGCCCAGCACTGCGGCTGATCCCAGC  
ATGGTGAGTGCTACATGTACCCAGCAGGGGCCACTGGGGCGCAGGCGGCCCCCAGGCCAGGCCGGAC  
CCACCGCCAGCCCCGCTTACTCATCCTACCAGCCTACTCCCACAGCGGGCTACCAGAACGTGGCCTCCCA  
GGCCCCACAGAGCCTCCCGGCCATCTCTCAGCCTCCGCAGTCCAGCACCATGGGCTACATGGGGAGCCAG  
TCAGTCTCCATGGGCTACCAGCCTTACAACATGCAGAATCTCATGACCACCCTCCAAGCCAGGATGCGT  
CTCTGCCACCCCAGCAGCCCTACATCGCGGGGCGAGCCCATGTACCAGCAGATGGCACCTCTGGCGG  
TCCCCCCCAGCAGCAGCCCCCGTGGCCCAGCAACCGCAGGCACAGGGGCCCGGCACAGGGCAGCGAG  
GCCAGCTCATTCATTCGACTGA

>|cl|NM\_001530.4\_cds\_NP\_001521.1\_1 [gene=HIF1A] [db\_xref=CCDS:CCDS9753.1] [protein=hypoxia-inducible factor 1-alpha isoform 1] [protein\_id=NP\_001521.1] [location=293..2773] [gbkey=CDS]

ATGGAGGGCGCCGGCGGCGCAACGACAAGAAAAAGATAAGTTCTGAACGTCGAAAAGAAAAGTCTCGAG  
ATGCAGCCAGATCTCGGCGAAGTAAAGAATCTGAAGTTTTTTATGAGCTTGCTCATCAGTTGCCACTTCC  
ACATAATGTGAGTTCGCATCTTGATAAGGCCTCTGTGATGAGGCTTACCATCAGCTATTTGCGTGTGAGG  
AAACTTCTGGATGCTGGTGATTTGGATATTGAAGATGACATGAAAGCACAGATGAATTGCTTTTATTTGA  
AAGCCTTGGATGGTTTTGTTATGGTTCTCACAGATGATGGTGACATGATTACATTTCTGATAATGTGAA  
CAAATACATGGGATTAACCTCAGTTTGAACAACTGGACACAGTGTGTTTGATTTTACTCATCCATGTGAC  
CATGAGGAAATGAGAGAAATGCTTACACACAGAAATGGCCTTGTGAAAAAGGGTAAAGAACAAAACACAC  
AGCGAAGCTTTTTTCTCAGAATGAAGTGACCCTAACTAGCCGAGGAAGAACTATGAACATAAAGTCTGC  
AACATGGAAGGTATTGCACTGCACAGGCCACATTCACGTATATGATACCAACAGTAACCAACCTCAGTGT  
GGGTATAAGAAACACCTATGACCTGCTTGGTGCTGATTTGTGAACCCATTCCTCACCCATCAAATATTG  
AAATTCCTTTAGATAGCAAGACTTTCCTCAGTCGACACAGCCTGGATATGAAATTTTCTTATTGTGATGA  
AAGAATTACCGAATTGATGGGATATGAGCCAGAAGAACTTTTAGGCCGCTCAATTTATGAATATTATCAT  
GCTTTGGA CTCTGATCATCTGACCAAACTCATCATGATATGTTTACTAAAGGACAAGTCACCACAGGAC  
AGTACAGGATGCTTGCCAAAAGAGGTGGATATGTCTGGGTTGAAACTCAAGCAACTGTCATATATAACAC  
CAAGAATTCTCAACCACAGTGCATTGTATGTGTGAATTACGTTGTGAGTGGTATTATTACGACGACTTG  
ATTTTCTCCCTTCAACAAACAGAATGTGTCCTTAAACCGGTTGAATCTTCAGATATGAAAATGACTCAGC  
TATTCACCAAAGTTGAATCAGAAGATACAAGTAGCCTCTTTGACAACTTAAGAAGGAACCTGATGCTTT  
AACTTTGCTGGCCCCAGCCGCTGGAGACACAATCATATCTTTAGATTTTGGCAGCAACGACACAGAACT  
GATGACCAGCAACTTGAGGAAGTACCATTATATAATGATGTAATGCTCCCCTACCCAACGAAAAATTAC  
AGAATATAAATTTGGCAATGTCTCCATTACCCACCGCTGAAACGCCAAAGCCACTTCGAAGTAGTGCTGA  
CCCTGCACTCAATCAAGAAGTTGCATTAATAATTAGAACCAAATCCAGAGTCACTGGAACCTTCTTTTACC  
ATGCCCCAGATTCAGGATCAGACACCTAGTCCTCCGATGGAAGCACTAGACAAAGTTCACCTGAGCCTA  
ATAGTCCCAGTGAATATTGTTTTATGTGGATAGTGATATGGTCAATGAATTCAAGTTGGAATTGGTAGA

AAAACTTTTGCTGAAGACACAGAAGCAAAGAACCCATTTTCTACTCAGGACACAGATTTAGACTTGGAG  
ATGTTAGCTCCCTATATCCAATGGATGATGACTTCCAGTTACGTTCTTCGATCAGTTGTCACCATTAG  
AAAGCAGTTCCGCAAGCCCTGAAAGCGCAAGTCCTCAAAGCACAGTTACAGTATTCCAGCAGACTCAAAT  
ACAAGAACCTACTGCTAATGCCACCACTACCACTGCCACCACTGATGAATTA AAAACAGTGACAAAAGAC  
CGTATGGAAGACATTA AAATATTGATTGCATCTCCATCTCCTACCCACATACATAAAGAACTACTAGTG  
CCACATCATCACCATATAGAGATACTCAAAGTCGGACAGCCTCACCAAACAGAGCAGGAAAAGGAGTCAT  
AGAACAGACAGAAAAATCTCATCCAAGAAGCCCTAACGTGTTATCTGTCGCTTTGAGTCAAAGAACTACA  
GTTCTGAGGAAGAACTAAATCCAAAGATACTAGCTTTGCAGAATGCTCAGAGAAAGCGAAAAATGGAAC  
ATGATGGTTCAC TTTTTCAAGCAGTAGGAATTGGAACATTATTACAGCAGCCAGACGATCATGCAGCTAC  
TACATCACTTTCTTGAAACGTGTAAAAGGATGCAAATCTAGTGAACAGAATGGAATGGAGCAAAAGACA  
ATTATTTTAATACCCTCTGATTTAGCATGTAGACTGCTGGGGCAATCAATGGATGAAAGTGGATTACCAC  
AGCTGACCAGTTATGATTGTGAAGTTAATGCTCCTATACAAGGCAGCAGAAACCTACTGCAGGGTGAAGA  
ATTACTCAGAGCTTTGGATCAAGTAACTGA

>|cl|NM\_007355.4\_cds\_NP\_031381.2\_1 [gene=HSP90AB1] [db\_xref=CCDS:CCDS4909.1] [protein=heat  
shock protein HSP 90-beta isoform a] [protein\_id=NP\_031381.2] [location=96..2270] [gbkey=CDS]

ATGCCTGAGGAAGTGCACCATGGAGAGGAGGAGGTGGAGACTTTTGCCTTTCAGGCAGAAATTGCCCAAC  
TCATGTCCCTCATCATCAATACCTTCTATTCCAACAAGGAGATTTTCTTCGGGAGTTGATCTCTAATGC  
TTCTGATGCCTTGGACAAGATTCGCTATGAGAGCCTGACAGACCCTTCGAAGTTGGACAGTGGTAAAGAG  
CTGAAAATTGACATCATCCCCAACCTCAGGAACGTACCCTGACTTTGGTAGACACAGGCATTGGCATGA  
CCAAAGCTGATCTCATAAATAATTTGGGAACCATTGCCAAGTCTGGTACTAAAGCATTTCATGGAGGCTCT  
TCAGGCTGGTGCAGACATCTCCATGATTGGGCAGTTTGGTGTGGCTTTTATTCTGCCTACTTGGTGGCA  
GAGAAAGTGGTTGTGATCACAAAGCACAAACGATGATGAACAGTATGCTTGGGAGTCTTCTGCTGGAGGTT

CCTTCACTGTGCGTGCTGACCATGGTGAGCCCATTGGCAGGGGTACCAAAGTGATCCTCCATCTTAAAGA  
AGATCAGACAGAGTACCTAGAAGAGAGGGCGGGTCAAAGAAGTAGTGAAGAAGCATTCTCAGTTCATAGGC  
TATCCCATCACCCCTTTATTTGGAGAAGGAACGAGAGAAGGAAATTAGTGATGATGAGGCAGAGGAAGAGA  
AAGGTGAGAAAGAAGAGGAAGATAAAGATGATGAAGAAAAACCAAGATCGAAGATGTGGGTTCAGATGA  
GGAGGATGACAGCGGTAAGGATAAGAAGAAGAAAATAAGAAGATCAAAGAGAAATACATTGATCAGGAA  
GAACTAAACAAGACCAAGCCTATTTGGACCAGAAACCCTGATGACATCACCCAAGAGGAGTATGGAGAAT  
TCTACAAGAGCCTCACTAATGACTGGGAAGACCACTTGGCAGTCAAGCACTTTTCTGTAGAAGGTCAGTT  
GGAATTCAGGGCATTGCTATTTATTCCTCGTCGGGCTCCCTTTGACCTTTTGGAGAACAAGAAGAAAAAG  
AACAACATCAAACCTATGTCCGCGTGTGTTTCATCATGGACAGCTGTGATGAGTTGATACCAGAGTATC  
TCAATTTTATCCGTGGTGTGGTTGACTCTGAGGATCTGCCCCTGAACATCTCCGAGAAATGCTCCAGCA  
GAGCAAAATCTTGAAAGTCATTCGCAAAAACATTGTTAAGAAGTGCCTTGAGCTCTTCTCTGAGCTGGCA  
GAAGACAAGGAGAATTACAAGAAATTCTATGAGGCATTCTCTAAAAATCTCAAGCTTGGAATCCACGAAG  
ACTCCACTAACCGCCGCCCTGTCTGAGCTGCTGCGCTATCATACCTCCCAGTCTGGAGATGAGATGAC  
ATCTCTGTCAGAGTATGTTTCTCGCATGAAGGAGACACAGAAGTCCATCTATTACATCACTGGTGAGAGC  
AAAGAGCAGGTGGCCAACTCAGCTTTTGTGGAGCGAGTGCAGAAACGGGGCTTCGAGGTGGTATATATGA  
CCGAGCCCATTGACGAGTACTGTGTGCAGCAGCTCAAGGAATTTGATGGGAAGAGCCTGGTCTCAGTTAC  
CAAGGAGGGTCTGGAGCTGCCTGAGGATGAGGAGGAGAAGAAGAAGATGGAAGAGAGCAAGGCCAAAGTTT  
GAGAACCTCTGCAAGCTCATGAAAGAAATCTTAGATAAGAAGGTTGAGAAGGTGACAATCTCCAATAGAC  
TTGTGTCTTCACCTTGCTGCATTGTGACCAGCACCTACGGCTGGACAGCCAATATGGAGCGGATCATGAA  
AGCCCAGGCACTTCGGGACAACCTCCACCATGGGCTATATGATGGCCAAAAAGCACCTGGAGATCAACCCT  
GACCACCCATTGTGGAGACGCTGCGGCAGAAAGGCTGAGGCCGACAAGAATGATAAGGCAGTTAAGGACC  
TGGTGGTGCTGCTGTTTGAAACCGCCCTGCTATCTTCTGGCTTTTCCCTTGAGGATCCCCAGACCCACTC  
CAACCGCATCTATCGCATGATCAAGCTAGGTCTAGGTATTGATGAAGATGAAGTGGCAGCAGAGGAACCC  
AATGCTGCAGTTCCTGATGAGATCCCCCTCTCGAGGGCGATGAGGATGCGTCTCGCATGGAAGAAGTCG  
ATTAG

>|c| NM\_005347.5\_cds\_NP\_005338.1\_1 [gene=HSPA5] [db\_xref=CCDS:CCDS6863.1]  
[protein=endoplasmic reticulum chaperone BiP precursor] [protein\_id=NP\_005338.1]  
[location=218..2182] [gbkey=CDS]

ATGAAGCTCTCCCTGGTGGCCGCGATGCTGCTGCTGCTCAGCGCGGCGCGGGCCGAGGAGGAGGACAAGA  
AGGAGGACGTGGGCACGGTGGTCGGCATCGACCTGGGGACCACCTACTCCTGCGTCGGCGTGTTCAAGAA  
CGGCCGCGTGAGATCATCGCCAACGATCAGGGCAACCGCATCACGCCGTCCTATGTCGCCTTCACTCCT  
GAAGGGGAACGTCTGATTGGCGATGCCGCCAAGAACCAGCTCACCTCCAACCCGAGAACACGGTCTTTG  
ACGCCAAGCGGCTCATCGGCCGACGTGGAATGACCCGTCTGTGCAGCAGGACATCAAGTTCTTGCCGTT  
CAAGGTGGTTGAAAAGAAAACATAACCATACATTCAAGTTGATATTGGAGGTGGGCAAACAAAGACATTT  
GCTCCTGAAGAAATTTCTGCCATGGTTCTCACTAAAATGAAAGAAACCGCTGAGGCTTATTTGGGAAAGA  
AGGTTACCCATGCAGTTGTTACTGTACCAGCCTATTTTAATGATGCCCAACGCCAAGCAACCAAAGACGC  
TGGAACATTGCTGGCCTAAATGTTATGAGGATCATCAACGAGCCTACGGCAGCTGCTATTGCTTATGGC  
CTGGATAAGAGGGAGGGGGAGAAGAACATCCTGGTGTTTGACCTGGGTGGCGGAACCTTCGATGTGTCTC  
TTCTCACCATTGACAATGGTGTCTTCGAAGTTGTGGCCACTAATGGAGATACTCATCTGGGTGGAGAAGA  
CTTTGACCAGCGTGTGCATGGAACACTTCATCAAACTGTACAAAAAGAAGACGGGCAAAGATGTCAGGAAA  
GACAATAGAGCTGTGCAGAACTCCGGCGCGAGGTAGAAAAGGCCAAACGGGCCCTGTCTTCTCAGCATC  
AAGCAAGAATTGAAATTGAGTCCTTCTATGAAGGAGAAGACTTTTCTGAGACCCTGACTCGGGCCAAATT  
TGAAGAGCTCAACATGGATCTGTTCCGGTCTACTATGAAGCCCGTCCAGAAAGTGTTGGAAGATTCTGAT  
TTGAAGAAGTCTGATATTGATGAAATTGTTCTTGTGGTGGCTCGACTCGAATTCCAAAGATTCAGCAAC  
TGGTTAAAGAGTTCTCAATGGCAAGGAACCATCCCGTGGCATAAACCCAGATGAAGCTGTAGCGTATGG  
TGCTGCTGTCCAGGCTGGTGTGCTCTCTGGTGATCAAGATACAGGTGACCTGGTACTGCTTGATGTATGT  
CCCCTTACACTTGGTATTGAACTGTGGGAGGTGTGATGACCAAACCTGATTCCAAGGAACACAGTGGTGC

CTACCAAGAAGTCTCAGATCTTTTCTACAGCTTCTGATAATCAACCAACTGTTACAATCAAGGTCTATGA  
AGGTGAAAGACCCCTGACAAAAGACAATCATCTTCTGGGTACATTTGATCTGACTGGAATTCCTCTGCT  
CCTCGTGGGGTCCCACAGATTGAAGTCACCTTTGAGATAGATGTGAATGGTATTCTTCGAGTGACAGCTG  
AAGACAAGGGTACAGGGAACAAAAATAAGATCACAATCACCAATGACCAGAATCGCCTGACACCTGAAGA  
AATCGAAAGGATGGTTAATGATGCTGAGAAGTTTGCTGAGGAAGACAAAAGCTCAAGGAGCGCATTGAT  
ACTAGAAATGAGTTGGAAAGCTATGCCTATTCTCTAAAGAATCAGATTGGAGATAAAGAAAAGCTGGGAG  
GTAAACTTTCCTCTGAAGATAAGGAGACCATGGAAAAAGCTGTAGAAGAAAAGATTGAATGGCTGGAAAG  
CCACCAAGATGCTGACATTGAAGACTTCAAAGCTAAGAAGAAGGAACTGGAAGAAATTGTTCAACCAATT  
ATCAGCAAACCTCTATGGAAGTGCAGGCCCTCCCCAACTGGTGAAGAGGATACAGCAGAAAAAGATGAGT  
TGTAAG

>|cl|NM\_006597.6\_cds\_NP\_006588.1\_1 [gene=HSPA8] [db\_xref=CCDS:CCDS8440.1] [protein=heat  
shock cognate 71 kDa protein isoform 1] [protein\_id=NP\_006588.1] [location=79..2019] [gbkey=CDS]

ATGTCCAAGGGACCTGCAGTTGGTATTGATCTTGGCACCACTACTCTTGTGTGGGTGTTTTCCAGCACG  
GAAAAGTCGAGATAATTGCCAATGATCAGGGAAACCGAACCCTCCAAGCTATGTCGCCTTTACGGACAC  
TGAACGGTTGATCGGTGATGCCGCAAAGAATCAAGTTGCAATGAACCCACCAACACAGTTTTTGTATGCC  
AAACGTCTGATTGGACGCAGATTTGATGATGCTGTTGTCCAGTCTGATATGAAACATTGGCCCTTTATGG  
TGGTGAATGATGCTGGCAGGCCCAAGGTCCAAGTAGAATACAAGGGAGAGACCAAAAGCTTCTATCCAGA  
GGAGGTGTCTTCTATGGTTCTGACAAAGATGAAGGAAATTGCAGAAGCCTACCTTGGGAAGACTGTTACC  
AATGCTGTGGTCACAGTGCCAGCTTACTTTAATGACTCTCAGCGTCAGGCTACCAAAGATGCTGGAACATA  
TTGCTGGTCTCAATGTACTTAGAATTATTAATGAGCCAACTGCTGCTGCTATTGCTTACGGCTTAGACAA  
AAAGGTTGGAGCAGAAAGAAACGTGCTCATCTTTGACCTGGGAGGTGGCACTTTTGATGTGTCAATCCTC  
ACTATTGAGGATGGAATCTTTGAGGTCAAGTCTACAGCTGGAGACACCACTTGGGTGGAGAAGATTTTG

ACAACCGAATGGTCAACCATTTTATTGCTGAGTTTAAGCGCAAGCATAAGAAGGACATCAGTGAGAACAA  
GAGAGCTGTAAGACGCCTCCGTACTGCTTGTGAACGTGCTAAGCGTACCCTCTCTTCCAGCACCCAGGCC  
AGTATTGAGATCGATTCTCTCTATGAAGGAATCGACTTCTATACCTCCATTACCCGTGCCCCGATTGAAG  
AACTGAATGCTGACCTGTTCCGTGGCACCCCTGGACCCAGTAGAGAAAGCCCTTCGAGATGCCAACTAGA  
CAAGTCACAGATTCATGATATTGCTGCTGGTTGGTGGTTCTACTCGTATCCCCAAGATTGAGAAGCTTCTC  
CAAGACTTCTTCAATGGAAAAGAACTGAATAAGAGCATCAACCCTGATGAAGCTGTTGCTTATGGTGCAG  
CTGTCCAGGCAGCCATCTTGTCTGGAGACAAGTCTGAGAATGTTCAAGATTGCTGCTCTTGGATGTCAC  
TCCTCTTTCCCTTGGTATTGAAACTGCTGGTGGAGTCATGACTGTCCTCATCAAGCGTAATACCACCATT  
CCTACCAAGCAGACACAGACCTTCACTACCTATTCTGACAACCAGCCTGGTGTGCTTATTCAGGTTTATG  
AAGGCGAGCGTGCCATGACAAAGGATAACAACCTGCTTGGCAAGTTTGAAGTACAGGCATACCTCCTGC  
ACCCCGAGGTGTTCTCAGATTGAAGTCACTTTTGACATTGATGCCAATGGTATACTCAATGTCTCTGCT  
GTGGACAAGAGTACGGGAAAAGAGAACAAGATTACTATCACTAATGACAAGGGCCGTTTGAGCAAGGAAG  
ACATTGAACGTATGGTCCAGGAAGCTGAGAAGTACAAAGCTGAAGATGAGAAGCAGAGGGACAAGGTGTC  
ATCCAAGAATTCATTGAGTCCTATGCCTTCAACATGAAAGCAACTGTTGAAGATGAGAACTTCAAGGC  
AAGATTAACGATGAGGACAAACAGAAGATTCTGGACAAGTGTAATGAAATTATCAACTGGCTTGATAAGA  
ATCAGACTGCTGAGAAGGAAGAATTTGAACATCAACAGAAAGAGCTGGAGAAAGTTTGCAACCCCATCAT  
CACCAAGCTGTACCAGAGTGCAGGAGGCATGCCAGGAGGAATGCCTGGGGGATTTCCTGGTGGTGGAGCT  
CCTCCCTCTGGTGGTGGTCTCCTCAGGGCCCACCATTGAAGAGGTTGATTAA

>|cl|NM\_014365.3\_cds\_NP\_055180.1\_1 [gene=HSPB8] [db\_xref=CCDS:CCDS9189.1] [protein=heat  
shock protein beta-8] [protein\_id=NP\_055180.1] [location=383..973] [gbkey=CDS]

ATGGCTGACGGTCAGATGCCCTTCTCCTGCCACTACCCAAGCCGCCTGCGCCGAGACCCCTCCGGGACT  
CTCCCCTCTCCTCTCGCCTGCTGGATGATGGCTTTGGCATGGACCCCTCCAGACGACTTGACAGCCTC

TTGGCCCGACTGGGCTCTGCCTCGTCTCTCCTCCGCTGGCCAGGCACCCTAAGGTCGGGCATGGTGCCC  
CGGGGCCCCACTGCCACCGCCAGGTTTGGGGTGCCTGCCGAGGGCAGGACCCCCCACCCTTCCCTGGGG  
AGCCCTGGAAAGTGTGTGTGAATGTGCACAGCTTCAAGCCAGAGGAGTTGATGGTGAAGACCAAAGATGG  
ATACGTGGAGGTGTCTGGCAAACATGAAGAGAAACAGCAAGAAGGTGGCATTGTTTCTAAGAACTTCACA  
AAGAAAATCCAGCTTCTGCAGAGGTGGATCCTGTGACAGTATTTGCCTCACTTTCCCAGAGGGTCTGC  
TGATCATCGAAGCTCCCCAGGTCCCTCCTTACTCAACATTTGGAGAGAGCAGTTTCAACAACGAGCTTCC  
CCAGGACAGCCAGGAAGTCACCTGTACCTGA

>Icl|NM\_000619.3\_cds\_NP\_000610.2\_1 [gene=IFNG] [db\_xref=CCDS:CCDS8980.1] [protein=interferon  
gamma precursor] [protein\_id=NP\_000610.2] [location=126..626] [gbkey=CDS]

ATGAAATATACAAGTTATATCTTGGCTTTTCAGCTCTGCATCGTTTTGGGTTCTTTGGCTGTTACTGCC  
AGGACCCATATGTAAAAGAAGCAGAAAACCTTAAGAAATATTTTAATGCAGGTCATTTCAGATGTAGCGGA  
TAATGGAACCTCTTTCTTAGGCATTTTGAAGAATTGGAAAGAGGAGAGTGACAGAAAAATAATGCAGAGC  
CAAATTGTCTCCTTTTACTTCAAACCTTTTAAAACTTTTAAAGATGACCAGAGCATCCAAAAGAGTGTGG  
AGACCATCAAGGAAGACATGAATGTCAAGTTTTTCAATAGCAACAAAAAGAAACGAGATGACTTCGAAAA  
GCTGACTAATTATTCGGTAACTGACTTGAATGTCCAACGCAAAGCAATACATGAACTCATCCAAGTGATG  
GCTGAACTGTCGCCAGCAGCTAAAACAGGGAAGCGAAAAAGGAGTCAGATGCTGTTTCGAGGTCGAAGAG  
CATCCCAGTAA

>|cl|NM\_001190720.3\_cds\_NP\_001177649.2\_1 [gene=IKBKB] [db\_xref=CCDS:CCDS55228.1]  
[protein=inhibitor of nuclear factor kappa-B kinase subunit beta isoform 2]  
[protein\_id=NP\_001177649.2] [location=256..2334] [gbkey=CDS]

ATGAGAAGGCTGACCCACCCCAATGTGGTGGCTGCCCAGATGTCCCTGAGGGGATGCAGAACTTGGCGC  
CCAATGACCTGCCCCTGCTGGCCATGGAGTACTGCCAAGGAGGAGATCTCCGGAAGTACCTGAACCAAGTT  
TGAGAACTGCTGTGGTCTGCGGGAAGGTGCCATCCTCACCTTGCTGAGTGACATTGCCTCTGCGCTTAGA  
TACCTTCATGAAAACAGAATCATCCATCGGGATCTAAAGCCAGAAAACATCGTCCTGCAGCAAGGAGAAC  
AGAGGTTAATACACAAAATTATTGACCTAGGATATGCCAAGGAGCTGGATCAGGGCAGTCTTTGCACATC  
ATTCGTGGGGACCCTGCAGTACCTGGCCCCAGAGCTACTGGAGCAGCAGAAGTACACAGTGACCGTCGAC  
TACTGGAGCTTCGGCACCCCTGGCCTTTGAGTGCATCACGGGCTTCGGGCCCTTCTCCCAACTGGCAGC  
CCGTGCAGTGGCATTCAAAAGTGCGGCAGAAGAGTGAGGTGGACATTGTTGTTAGCGAAGACTTGAATGG  
AACGGTGAAGTTTTCAAGCTCTTTACCCTACCCCAATAATCTTAACAGTGTCTGGCTGAGCGACTGGAG  
AAGTGGCTGCAACTGATGCTGATGTGGCACCCCCGACAGAGGGGCACGGATCCCACGTATGGGCCCAATG  
GCTGCTCAAGGCCCTGGATGACATCTTAACTTAAAGCTGGTTCATATCTTGAACATGGTCACGGGCAC  
CATCCACACCTACCCTGTGACAGAGGATGAGAGTCTGCAGAGCTTGAAGGCCAGAATCCAACAGGACACG  
GGCATCCCAGAGGAGGACCAGGAGCTGCTGCAGGAAGCGGGCCTGGCGTTGATCCCCGATAAGCCTGCCA  
CTCAGTGTATTTAGACGGCAAGTTAAATGAGGGCCACACATTGGACATGGATCTTGTTTTCTCTTTGA  
CAACAGTAAAATCACCTATGAGACTCAGATCTCCCCACGGCCCCAACCTGAAAGTGTGAGCTGTATCCTT  
CAAGAGCCCAAGAGGAATCTCGCCTTCTTCAGCTGAGGAAGGTGTGGGGCCAGGTCTGGCACAGCATCC  
AGACCCTGAAGGAAGATTGCAACCGGCTGCAGCAGGGACAGCGAGCCGCGCATGATGAATCTCCTCCGAAA  
CAACAGCTGCCTCTCCAAAATGAAGAATTCCATGGCTTCCATGTCTCAGCAGCTCAAGGCCAAGTTGGAT  
TTCTTCAAAACCAGCATCCAGATTGACCTGGAGAAGTACAGCGAGCAAACCGAGTTTGGGATCACATCAG  
ATAAACTGCTGCTGGCCTGGAGGGAAATGGAGCAGGCTGTGGAGCTCTGTGGGCGGGAGAACGAAGTGAA  
ACTCCTGGTAGAACGGATGATGGCTCTGCAGACCGACATTGTGGACTTACAGAGGAGCCCCATGGGCCGG  
AAGCAGGGGGGAACGCTGGACGACCTAGAGGAGCAAGCAAGGGAGCTGTACAGGAGACTAAGGGAAAAAC  
CTCGAGACCAGCGAACTGAGGGTGACAGTCAGGAAATGGTACGGCTGCTGCTTCAGGCAATTCAGAGCTT

CGAGAAGAAAGTGCGAGTGATCTATACGCAGCTCAGTAAACTGTGGTTTGCAAGCAGAAGGCGCTGGAA  
CTGTTGCCCAAGGTGGAAGAGGTGGTGAGCTTAATGAATGAGGATGAGAAGACTGTTGTCCGGCTGCAGG  
AGAAGCGGCAGAAGGAGCTCTGGAATCTCCTGAAGATTGCTTGTAGCAAGGTCCGTGGTCTGTCACTGG  
AAGCCCGGATAGCATGAATGCCTCTCGACTTAGCCAGCCTGGGCAGCTGATGTCTCAGCCCTCCACGGCC  
TCCAACAGCTTACCTGAGCCAGCCAAGAAGAGTGAAGAACTGGTGGCTGAAGCACATAACCTCTGCACCC  
TGCTAGAAAATGCCATACAGGACACTGTGAGGGAACAAGACCAGAGTTTCACGGCCCTAGACTGGAGCTG  
GTTACAGACGGAAGAAGAAGAGCACAGCTGCCTGGAGCAGGCCTCATGA

>|cl|NM\_001193321.2\_cds\_NP\_001180250.1\_1 [gene=IKBKE] [db\_xref=CCDS:CCDS53464.1]

[protein=inhibitor of nuclear factor kappa-B kinase subunit epsilon isoform 3]

[protein\_id=NP\_001180250.1] [location=482..2377] [gbkey=CDS]

ATGGAGTACTGCTCCAGTGGGAGCCTGCTGAGTGTGCTGGAGAGCCCTGAGAATGCCTTTGGGCTGCCTG  
AGGATGAGTTCCTGGTGGTGCTGCGCTGTGTGGTGGCCGGCATGAACCACCTGCGGGAGAACGGCATTGT  
GCATCGCGACATCAAGCCGGGGAACATCATGCGCCTCGTAGGGGAGGAGGGGCAGAGCATCTACAAGCTG  
ACAGACTTCGGCGCTGCCCCGGGAGCTGGATGATGATGAGAAGTTCGTCTCGGTCTATGGGACTGAGGAGT  
ACCTGCATCCCGACATGTATGAGCGGGCGGTGCTTCGAAAGCCCCAGCAAAAAGCGTTCGGGGTGA CTGT  
GGATCTCTGGAGCATTGGAGTGACCTTG TACCATGCAGCCACTGGCAGCCTGCCCTTCATCCCCTTTGGT  
GGGCCACGGCGGAACAAGGAGATCATGTACCGGATCACCACGGAGAAGCCGGCTGGGGCCATTGCAGGTG  
CCCAGAGGCGGGAGAACGGGCCCTGGAGTGGAGCTACACCCTCCCCATCACCTGCCAGCTGTCACTGGG  
GCTGCAGAGCCAGCTGGTGCCCATCTGGCCAACATCTGGAGGTGGAGCAGGCCAAGTGCTGGGGCTTC  
GACCAGTTCTTTGCGGAGACCAGTGACATCCTGCAGCGAGTTGTCGTCCATGTCTTCTCCCTGTCCCAGG  
CAGTCCTGCACCACATCTATATCCATGCCACAACACGATAGCCATTTTCCAGGAGGCCGTGCACAAGCA  
GACCAGTGTGGCCCCCGACACCAGGAGTACCTCTTTGAGGGTCACCTCTGTGTCCTCGAGCCCAGCGTC

TCAGCACAGCACATCGCCACACGACGGCAAGCAGCCCCCTGACCCTCTTCAGCACAGCCATCCCTAAGG  
GGCTGGCCTTCAGGGACCCTGCTCTGGACGTCCCCAAGTTCGTCCCCAAAGTGGACCTGCAGGCGGATTA  
CAAACTGCCAAGGGCGTGTTGGGCGCCGGCTACCAGGCCCTGCGGCTGGCACGGGCCCTGCTGGATGGG  
CAGGAGCTAATGTTTCGGGGGCTGCACTGGGTCATGGAGGTGCTCCAGGCCACATGCAGACGGACTCTGG  
AAGTGGCAAGGACATCCCTCCTCTACCTCAGCAGCAGCCTGGGAACTGAGAGGTTCAGCAGCGTGGCTGG  
AACGCCTGAGATCCAGGAACTGAAGGCGGCTGCAGAACTGAGGTCCAGGCTGCGGACTCTAGCGGAGGTC  
CTCTCCAGATGCTCCCAAAATATCACGGAGACCCAGGAGAGCCTGAGCAGCCTGAACCGGGAGCTGGTGA  
AGAGCCGGGATCAGGTACATGAGGACAGAAGCATCCAGCAGATTCACTGCTGTTTGGACAAGATGAACTT  
CATCTACAAACAGTTCAAGAAGTCTAGGATGAGGCCAGGGCTTGGCTACAACGAGGAGCAGATTCACAAG  
CTGGATAAGGTGAATTTCACTCATTTAGCCAAAAGACTCCTGCAGGTGTTCCAGGAGGAGTGCGTGCAGA  
AGTATCAAGCGTCCTTAGTCACACACGGCAAGAGGATGAGGGTGGTGCACGAGACCAGGAACACCTGCG  
CCTGGTTGGCTGTTCTGTGGCTGCCTGTAACACAGAAGCCCAGGGGGTCCAGGAGAGTCTCAGCAAGCTC  
CTGGAAGAGCTATCTACCCAGCTCCTTCAGGACCGAGCAAAGGGGGCTCAGGCCTCGCCGCCTCCCATAG  
CTCCTTACCCCAGCCCTACACGAAAGGACCTGCTTCTCCACATGCAAGAGCTCTGCGAGGGGATGAAGCT  
GCTGGCATCTGACCTCCTGGACAACAACCGCATCATCGAACGGCTAAATAGAGTCCCAGCACCTCCTGAT  
GTCTGA

>|cl|NM\_006850.3\_cds\_NP\_006841.1\_1 [gene=IL24] [db\_xref=CCDS:CCDS1471.1] [protein=interleukin-  
24 isoform 1 precursor] [protein\_id=NP\_006841.1] [location=276..896] [gbkey=CDS]

ATGAATTTTCAACAGAGGCTGCAAAGCCTGTGGACTTTAGCCAGACCCTTCTGCCCTCCTTTGCTGGCGA  
CAGCCTCTCAAATGCAGATGGTTGTGCTCCCTTGCCTGGGTTTTACCCTGCTTCTCTGGAGCCAGGTATC  
AGGGGCCCAGGGCCAAGAATTCCACTTTGGGCCCTGCCAAGTGAAGGGGGTTGTTCCCAGAACTGTGG  
GAAGCCTTCTGGGCTGTGAAAGACACTATGCAAGCTCAGGATAACATCACGAGTGCCCGGCTGCTGCAGC

AGGAGGTTCTGCAGAACGTCTCGGATGCTGAGAGCTGTTACCTTGTCACACCCTGCTGGAGTTCTACTT  
GAAAAGTGTTCCTCAAAAAGTACCACAATAGAACAGTTGAAGTCAGGACTCTGAAGTCATTCTCTACTCTG  
GCCAACAACTTTGTTCTCATCGTGTCACTGCAACCCAGTCAAGAAAATGAGATGTTTTCCATCAGAG  
ACAGTGCACACAGGCGGTTTCTGCTATTCCGGAGAGCATTCAAACAGTTGGACGTAGAAGCAGCTCTGAC  
CAAAGCCCTTGGGGAAGTGGACATTCTTCTGACCTGGATGCAGAAATTCTACAAGCTCTGA

>|cl|NM\_001145805.2\_cds\_NP\_001139277.1\_1 [gene=IRGM] [db\_xref=CCDS:CCDS47313.1]  
[protein=immunity-related GTPase family M protein isoform 2] [protein\_id=NP\_001139277.1]  
[location=1116..1661] [gbkey=CDS]

ATGGAAGCCATGAATGTTGAGAAAGCCTCAGCAGATGGGAACTTGCCAGAGGTGATCTCTAACATCAAGG  
AGACTCTGAAGATAGTGTCCAGGACACCAGTTAACATCACTATGGCAGGGGACTCTGGCAATGGGATGTC  
CACCTTCATCAGTGCCCTTCGAAACACAGGACATGAGGGTAAGGCCTCACCTCCTACTGAGCTGGTAAAA  
GCTACCCAAAGATGTGCCTCCTATTTCTCTTCCCACTTTTCAAATGTGGTGTTGTGGGACCTGCCTGGCA  
CAGGGTCTGCCACCACAACCCTGGAGAACTACCTGATGGAAATGCAGTTCAACCGGTATGACTTCATCAT  
GGTTGCATCTGCACAATTCAGCATGAATCATGTGATGCTTGCCAAAACCGCTGAGGACATGGGAAAGAAG  
TTCTACATTGTCTGGACCAAGCTAGACATGGACCTCAGCACAGGTGCCCTCCAGAAGTGCAGCTACTGC  
AGATCAGAGAAAATGTCCTGGAAAATCTCCAGAAGGAGCGGGTATGTGAATACTAA

>|cl|NM\_002204.4\_cds\_NP\_002195.1\_1 [gene=ITGA3] [db\_xref=CCDS:CCDS11558.1] [protein=integrin  
alpha-3 preproprotein] [protein\_id=NP\_002195.1] [location=331..3486] [gbkey=CDS]

ATGGGCCCCGGCCCCAGCCGCGCGCCCCGCGCCCCACGCCTGATGCTCTGTGCGCTCGCCTTGATGGTGG

CGGCCGGCGGCTGCGTCGTCTCCGCCTTCAACCTGGATACCCGATTCTGGTAGTGAAGGAGGCCGGGAA  
CCCGGGCAGCCTCTTCGGCTACTCGGTGCCCCCTCCATCGGCAGACAGAGCGGCAGCAGCGCTACCTGCTC  
CTGGCTGGTGCCCCCGGGAGCTCGCTGTGCCGATGGCTACACCAACCGGACTGGTGCTGTGTACCTGT  
GCCCACTCACTGCCACAAGGATGACTGTGAGCGGATGAACATCACAGTGAAAAATGACCCTGGCCATCA  
CATTATTGAGGACATGTGGCTTGGAGTGACTGTGGCCAGCCAGGGCCCTGCAGGCAGAGTTCTGGTCTGT  
GCCACCGCTACACCCAGGTGCTGTGGTCAGGGTCAGAAGACCAGCGGCGCATGGTGGGCAAGTGCTACG  
TGCGAGGCAATGACCTAGAGCTGGACTCCAGTGATGACTGGCAGACCTACCACAACGAGATGTGCAATAG  
CAACACAGACTACCTGGAGACGGGCATGTGCCAGCTGGGCACCAGCGGTGGCTTCACCCAGAACACTGTG  
TACTTCGGCGCCCCCGGTGCCTACAACTGGAAAGGAAACAGCTACATGATTCAGCGCAAGGAGTGGGACT  
TATCTGAGTATAGTTACAAGGACCCAGAGGACCAAGGAAACCTCTATATTGGGTACACGATGCAGGTAGG  
CAGCTTCATCCTGCACCCCCAAAAACATCACCATTGTGACAGGTGCCCCACGGCACCGACATATGGGCGCG  
GTGTTCTTGCTGAGCCAGGAGGCAGGCGGAGACCTGCGGAGGAGGCAGGTGCTGGAGGGCTCGCAGGTGG  
GCGCCTATTTTGGCAGCGCCATTGCCCTGGCAGACCTGAACAATGATGGGTGGCAGGACCTCCTGGTGGG  
CGCCCCCTACTACTTCGAGAGGAAAGAGGAAGTAGGGGGTGCCATCTATGTCTTCATGAACCAGGCGGGA  
ACCTCCTTCCCTGCTCACCCCTCACTCCTTCTTCATGGCCCCAGTGGCTCTGCCTTTGGTTTATCTGTGG  
CCAGCATTGGTGACATCAACCAGGATGGATTTAGGATATTGCTGTGGGAGCTCCGTTTGAAGGCTTGGG  
CAAAGTGTACATCTATCACAGTAGCTCTAAGGGGGCTCCTTAGACAGCCCCAGCAGGTAATCCATGGAGAG  
AAGCTGGGACTGCCTGGGTTGGCCACCTTCGGCTATTCCCTCAGTGGGCAGATGGATGTGGATGAGAACT  
TCTACCCAGACCTTCTAGTGGAAGCCTGTCAGACCACATTGTGCTGCTGCGGGCCCGGCCGTCATCAA  
CATCGTCCACAAGACCTTGGTGCCAGGCCAGCTGTGCTGGACCCTGCACTTTGCACGGCCACCTCTTGT  
GTGCAAGTGGAGCTGTGCTTTGCTTACAACCAGAGTGCCGGGAACCCCAACTACAGGCGAAACATCACCC  
TGGCCTACACTCTGGAGGCTGACAGGGACCGCCGGCCGCCCCGGCTCCGCTTTGCCGGCAGTGAGTCCGC  
TGTCTTCCACGGCTTCTTCTCCATGCCCGAGATGCGCTGCCAGAAGCTGGAGCTGCTCCTGATGGACAAC  
CTCCGTGACAACTCCGCCCCATCATCATCTCCATGAACTACTCTTTACCTTTGCGGATGCCCGATCGCC  
CCCGGCTGGGGCTGCGGTCCCTGGACGCCTACCCGATCCTCAACCAGGCACAGGCTCTGGAGAACCACAC

TGAGGTCCAGTTCAGAAAGGAGTGCGGGCCTGACAACAAGTGTGAGAGCAACTTGCAGATGCGGGCAGCC  
TTCGTGTCAGAGCAGCAGCAGAAGCTGAGCAGGCTCCAGTACAGCAGAGACGTCCGGAAATTGCTCCTGA  
GCATCAACGTGACGAACACCCGGACCTCGGAGCGCTCCGGGGAGGACGCCCACGAGGCGCTGCTCACCT  
GGTGGTGCCTCCCGCCTGCTGCTGCTCCTCAGTGCGCCCCCGGGCCTGCCAAGCTAATGAGACCATC  
TTTTGCGAGCTGGGGAACCCCTTCAAACGGAACCAGAGGATGGAGCTGCTCATCGCCTTTGAGGTCATCG  
GGGTGACCCTGCACACAAGGGACCTTCAGGTGCAGCTGCAGCTCTCCACGTCGAGTCACCAGGACAACCT  
GTGGCCCATGATCCTCACTCTGCTGGTGGACTATACACTCCAGACCTCGCTTAGCATGGTAAATCACCGG  
CTACAAAGCTTCTTTGGGGGACAGTGATGGGTGAGTCTGGCATGAAAAGTGTGGAGGATGTAGGAAGCC  
CCCTCAAGTATGAATTCCAGGTGGGCCCAATGGGGGAGGGGCTGGTGGGCCTGGGGACCCTGGTCCTAGG  
TCTGGAGTGGCCCTACGAAGTCAGCAATGGCAAGTGGCTGCTGTATCCACGGAGATCACCGTCCATGGC  
AATGGGTCTGGCCCTGCCGACCACCTGGAGACCTTATCAACCCTCTCAACCTCACTCTTTCTGACCCTG  
GGGACAGGCCATCATCCCCACAGCGCAGGCGGCGACAGCTGGATCCAGGGGGAGGCCAGGGCCCCCACC  
TGCTACTCTGGCTGCTGCCAAAAAGCCAAGTCTGAGACTGTGCTGACCTGTGCCACAGGGCGTGCCAC  
TGTGTGTGGCTAGAGTGCCCCATCCCTGATGCCCCGTTGTACCAACGTGACTGTGAAGGCACGAGTGT  
GGAACAGCACCTTCATCGAGGATTACAGAGACTTTGACCGAGTCCGGGTAAATGGCTGGGCTACCCTATT  
CCTCCGAACCAGCATCCCCACCATCAACATGGAGAACAAGACCACGTGGTTCTCTGTGGACATTGACTCG  
GAGCTGGTGGAGGAGCTGCCGGCCGAAATCGAGCTGTGGCTGGTGGTGGCCGTGGGTGCAGGGCTGC  
TGCTGCTGGGGCTGATCATCCTCCTGCTGTGGAAGTGCGGCTTCTCAAGCGAGCCGCACTCGCGCCT  
GTATGAAGCTAAGAGGCAGAAGGCGGAGATGAAGAGCCAGCCGTCAGAGACAGAGAGGCTGACCGACGAC  
TACTGA

>|NM\_000210.4\_cds\_NP\_000201.2\_1 [gene=ITGA6] [db\_xref=CCDS:CCDS2249.1] [protein=integrin  
alpha-6 isoform b preproprotein] [protein\_id=NP\_000201.2] [location=204..3425] [gbkey=CDS]

ATGGCCGCCGCCGGGCAGCTGTGCTTGCTCTACCTGTCGGCGGGGCTCCTGTCCCGGCTCGGCGCAGCCT  
TCAACTTGGACACTCGGGAGGACAACGTGATCCGGAAATATGGAGACCCCGGGAGCCTCTTCGGCTTCTC  
GCTGGCCATGCACTGGCAACTGCAGCCCGAGGACAAGCGGCTGTTGCTCGTGGGGGGCCCCGCGGGCAGAA  
GCGCTTCCACTGCAGAGAGCCAACAGAACGGGAGGGCTGTACAGCTGCGACATCACCGCCCGGGGGCCAT  
GCACGCGGATCGAGTTTGATAACGATGCTGACCCACGTGAGAAAGCAAGGAAGATCAGTGGATGGGGGT  
CACCGTCCAGAGCCAAGGTCCAGGGGGCAAGGTCGTGACATGTGCTCACCGATATGAAAAAGGCAGCAT  
GTTAATACGAAGCAGGAATCCCAGACATCTTTGGGCGGTGTTATGTCCTGAGTCAGAATCTCAGGATTG  
AAGACGATATGGATGGGGGAGATTGGAGCTTTTGTGATGGGCGATTGAGAGGCCATGAGAAATTTGGCTC  
TTGCCAGCAAGGTGTAGCAGCTACTTTTACTAAAGACTTTCATTACATTGTATTTGGAGCCCCGGGTACT  
TATAACTGGAAAGGGATTGTTCTGTAGAGCAAAAGAATAACACTTTTTTTGACATGAACATCTTTGAAG  
ATGGGCCTTATGAAGTTGGTGGAGAGACTGAGCATGATGAAAGTCTCGTTCCTGTTCTGCTAACAGTTA  
CTTAGGTTTTTCTTTGACTCAGGGAAAGGTATTGTTTCTAAAGATGAGATCACTTTTGTATCTGGTGCT  
CCCAGAGCCAATCACAGTGGAGCCGTGGTTTTGCTGAAGAGAGACATGAAGTCTGCACATCTCCTCCCTG  
AGCACATATTCGATGGAGAAGGTCTGGCCTCTTCATTTGGCTATGATGTGGCGGTGGTGGACCTCAACAA  
GGATGGGTGGCAAGATATAGTTATTGGAGCCCCACAGTATTTTGATAGAGATGGAGAAGTTGGAGGTGCA  
GTGTATGTCTACATGAACCAGCAAGGCAGATGGAATAATGTGAAGCCAATTCGTCTTAATGGAACCAAAG  
ATTCTATGTTTGGCATTGCAGTAAAAAATATTGGAGATATTAATCAAGATGGCTACCCAGATATTGCAGT  
TGGAGCTCCGTATGATGACTTGGGAAAGGTTTTTATCTATCATGGATCTGCAAATGGAATAAATACCAA  
CCAACACAGGTTCTCAAGGGTATATCACCTTATTTGGATATTCAATTGCTGGAAACATGGACCTTGATC  
GAAATTCCTACCCTGATGTTGCTGTTGGTTCCTCTCAGATTAGTAATATTTTCAGATCCCGGCCTGT  
GATTAATATTCAGAAAACCATCACAGTAACTCCTAACAGAAATTGACCTCCGCCAGAAAACAGCGTGTGGG  
GCGCCTAGTGGGATATGCCTCCAGGTTAAATCCTGTTTTGAATATACTGCTAACCCCGCTGGTTATAATC  
CTTCAATATCAATTGTGGGCACACTTGAAGCTGAAAAAGAAAGAAGAAAAATCTGGGCTATCCTCAAGAGT  
TCAGTTTCGAAACCAAGGTTCTGAGCCCAAATATACTCAAGAACTAACTCTGAAGAGGCAGAAACAGAAA  
GTGTGCATGGAGGAAACCCTGTGGCTACAGGATAATATCAGAGATAAACTGCGTCCCATTCCATAACTG

CCTCAGTGGAGATCCAAGAGCCAAGCTCTCGTAGGCGAGTGAATTCACCTTCCAGAAGTTCTTCCAATTCT  
GAATTCAGATGAACCCAAGACAGCTCATATTGATGTTCACTTCTTAAAAGAGGGATGTGGAGACGACAAT  
GTATGTAACAGCAACCTTAACTAGAAATATAAATTTTGCACCCGAGAAGGAAATCAAGACAAATTTTCTT  
ATTACCAATTCAAAAAGGTGTACCAGAACTAGTTCTAAAAGATCAGAAGGATATTGCTTTAGAAATAAC  
AGTGACAAACAGCCCTTCCAACCCAAGGAATCCCACAAAAGATGGCGATGACGCCCATGAGGCTAACTG  
ATTGCAACGTTTCCAGACACTTTAACCTATTCTGCATATAGAGAACTGAGGGCTTTCCTGAGAAACAGT  
TGAGTTGTGTTGCCAACCAGAATGGCTCGCAAGCTGACTGTGAGCTCGGAAATCCTTTTAAAAGAAATTC  
AAATGTCACTTTTTATTTGGTTTTAAGTACAACCTGAAGTCACCTTTGACACCCCAGATCTGGATATTAAT  
CTGAAGTTAGAAACAACAAGCAATCAAGATAATTTGGCTCCAATTACAGCTAAAGCAAAAGTGGTTATTG  
AACTGCTTTTATCGGTCTCGGGAGTTGCTAAACCTTCCAGGTGTATTTTGGAGGTACAGTTGTTGGCGA  
GCAAGCTATGAAATCTGAAGATGAAGTGGGAAGTTTAATAGAGTATGAATTCAGGGTAATAAACTTAGGT  
AAACCTCTTACAAACCTCGGCACAGCAACCTTGAACATTCAGTGGCCAAAAGAAATTAGCAATGGGAAAT  
GGTTGCTTTATTTGGTGAAAGTAGAATCCAAAGGATTGGAAAAGGTAACCTGTGAGCCACAAAAGGAGAT  
AAACTCCCTGAACCTAACGGAGTCTCACAACCTCAAGAAAGAAACGGGAAATTACTGAAAAACAGATAGAT  
GATAACAGAAAATTTTCTTTATTTGCTGAAAGAAAATACCAGACTCTTAACCTGTAGCGTGAACGTGAACT  
GTGTGAACATCAGATGCCCCTGCGGGGGCTGGACAGCAAGGCGTCTCTTATTTTGCCTCGAGGTTATG  
GAACAGCACATTTCTAGAGGAATATTCCAACTGAACTACTTGGACATTCTCATGCGAGCCTTCATTGAT  
GTGACTGCTGCTGCCGAAAATATCAGGCTGCCAATGCAGGCACTCAGGTTTCGAGTGACTGTGTTTCCCT  
CAAAGACTGTAGCTCAGTATTCGGGAGTACCTTGGTGGATCATCCTAGTGGCTATTCTCGCTGGGATCTT  
GATGCTTGCTTTATTAGTGTATATACTATGGAAGTGTGGTTTCTTCAAGAGAAATAAGAAAGATCATTAT  
GATGCCACATATACAAGGCTGAGATCCATGCTCAGCCATCTGATAAAGAGAGGCTTACTTCTGATGCAT  
AG

>Icl|NM\_002211.4\_cds\_NP\_002202.2\_1 [gene=ITGB1] [db\_xref=CCDS:CCDS7174.1] [protein=integrin beta-1 isoform 1A precursor] [protein\_id=NP\_002202.2] [location=87..2483] [gbkey=CDS]

ATGAATTTACAACCAATTTTCTGGATTGGACTGATCAGTTCAGTTTGCTGTGTGTTTGCTCAAACAGATG  
AAAATAGATGTTTAAAAGCAAATGCCAAATCATGTGGAGAATGTATACAAGCAGGGCCAAATTGTGGGTG  
GTGCACAAATTCAACATTTTACAGGAAGGAATGCCTACTTCTGCACGATGTGATGATTAGAACCTTA  
AAAAAGAAGGGTTGCCCTCCAGATGACATAGAAAATCCCAGAGGCTCCAAAGATATAAAGAAAAATAAAA  
ATGTAACCAACCGTAGCAAAGGAACAGCAGAGAAGCTCAAGCCAGAGGATATTACTCAGATCCAACCACA  
GCAGTTGGTTTTGCGATTAAGATCAGGGGAGCCACAGACATTTACATTAATTAAGAGAGCTGAAGAC  
TATCCCATTGACCTCTACTACCTTATGGACCTGTCTTACTCAATGAAAGACGATTTGGAGAATGTAAAAA  
GTCTTGGAACAGATCTGATGAATGAAATGAGGAGGATTACTTCGGACTTCAGAATTGGATTTGGCTCATT  
TGTGGAAAAGACTGTGATGCCTTACATTAGCACAAACACCAGCTAAGCTCAGGAACCTTGCACAAGTGAA  
CAGAACTGCACCAGCCATTTAGCTACAAAAATGTGCTCAGTCTTACTAATAAAGGAGAAGTATTTAATG  
AACTTGTTGGAAAACAGCGCATATCTGGAAATTTGGATTCTCCAGAAGGTGGTTTCGATGCCATCATGCA  
AGTTGCAGTTTGTGGATCACTGATTGGCTGGAGGAATGTTACACGGCTGCTGGTGTTCACAGATGCC  
GGGTTTCACTTTGCTGGAGATGGGAACTTGGTGGCATTGTTTTACCAAATGATGGACAATGTCACCTGG  
AAAATAATATGTACACAATGAGCCATTATTATGATTATCCTTCTATTGCTCACCTTGTCAGAACTGAG  
TGAAAATAATATTCAGACAATTTTGCAGTTACTGAAGAATTCAGCCTGTTTACAAGGAGCTGAAAAAC  
TTGATCCCTAAGTCAGCAGTAGGAACATTATCTGCAAATCTAGCAATGTAATTCAGTTGATCATTGATG  
CATACAATCCCTTTCCTCAGAAGTCATTTTGGAAAACGGCAAATTGTCAGAAGGCGTAACAATAAGTTA  
CAAATCTTACTGCAAGAACGGGGTGAATGGAACAGGGGAAAATGGAAGAAAATGTTCCAATATTTCCATT  
GGAGATGAGGTTCAATTTGAAATTAGCATAACTTCAAATAAGTGTCCAAAAAAGGATTCTGACAGCTTTA  
AAATTAGGCCTCTGGGCTTACGGAGGAAGTAGAGGTTATTCTTCAGTACATCTGTGAATGTGAATGCCA  
AAGCGAAGGCATCCCTGAAAGTCCCAAGTGTCATGAAGGAAATGGGACATTTGAGTGTGGCGCGTGCAGG  
TGCAATGAAGGGCGTGTTGGTAGACATTGTGAATGCAGCACAGATGAAGTTAACAGTGAAGACATGGATG  
CTTACTGCAGGAAAGAAAACAGTTCAGAAATCTGCAGTAACAATGGAGAGTGCCTGCTGCGGACAGTGTGT

TTGTAGGAAGAGGGATAATACAAATGAAATTTATTCTGGCAAATTCTGCGAGTGTGATAATTTCAACTGT  
GATAGATCCAATGGCTTAATTTGTGGAGGAAATGGTGTGTTGCAAGTGTCTGTGTGTGAGTGCAACCCCA  
ACTACACTGGCAGTGCATGTGACTGTTCTTTGGATACTAGTACTTGTGAAGCCAGCAACGGACAGATCTG  
CAATGGCCGGGGCATCTGCGAGTGTGGTGTCTGTAAGTGTACAGATCCGAAGTTTCAAGGGCAAACGTGT  
GAGATGTGTCAGACCTGCCTTGGTGTCTGTGCTGAGCATAAAGAATGTGTTCAAGTGCAGAGCCTTCAATA  
AAGGAGAAAAGAAAGACACATGCACACAGGAATGTTCTATTTTAACATTACCAAGGTAGAAAGTCGGGA  
CAAATTACCCAGCCGGTCCAACCTGATCCTGTGTCCATTGTAAGGAGAAGGATGTTGACGACTGTTGG  
TTCTATTTTACGTATTCAGTGAATGGGAACAACGAGGTCATGGTTCATGTTGTGGAGAATCCAGAGTGTG  
CCACTGGTCCAGACATCATTCCAATTGTAGCTGGTGTGGTTGCTGGAATTGTTCTTATTGGCCTTGCATT  
ACTGCTGATATGGAAGCTTTTAATGATAATTCATGACAGAAGGGAGTTTGCTAAATTTGAAAAGGAGAAA  
ATGAATGCCAAATGGGACACGGGTGAAAATCCTATTTATAAGAGTGCCGTAACAACCTGTGGTCAATCCGA  
AGTATGAGGGAAAATGA

>|cl|NM\_000213.5\_cds\_NP\_000204.3\_1 [gene=ITGB4] [db\_xref=CCDS:CCDS11727.1] [protein=integrin  
beta-4 isoform 1 precursor] [protein\_id=NP\_000204.3] [location=165..5633] [gbkey=CDS]

ATGGCAGGGCCACGCCCCAGCCCATGGGCCAGGCTGCTCCTGGCAGCCTTGATCAGCGTCAGCCTCTCTG  
GGACCTTGGCAAACCGCTGCAAGAAGGCCCCAGTGAAGAGCTGCACGGAGTGTGTCCGTGTGGATAAGGA  
CTGCGCCTACTGCACAGACGAGATGTTCAAGGACCGGCGCTGCAACACCCAGGCGGAGCTGCTGGCCGCG  
GGCTGCCAGCGGGAGAGCATCGTGGTCATGGAGAGCAGCTTCCAAATCACAGAGGAGACCCAGATTGACA  
CCACCCTGCGGCGCAGCCAGATGTCCCCCAAGGCCTGCGGGTCCGTCTGCGGCCCGGTGAGGAGCGGCA  
TTTTGAGCTGGAGGTGTTTGAGCCACTGGAGAGCCCCGTGGACCTGTACATCCTCATGGACTTCTCCAAC  
TCCATGTCCGATGATCTGGACAACCTCAAGAAGATGGGGCAGAACCTGGCTCGGGTCCTGAGCCAGCTCA  
CCAGCGACTACACTATTGGATTGGAAGTTTGTGGACAAAGTCAGCGTCCCGCAGACGGACATGAGGCC

TGAGAAGCTGAAGGAGCCCTGGCCCAACAGTGACCCCCCTTCTCCTTCAAGAACGTCATCAGCCTGACA  
GAAGATGTGGATGAGTTCCGGAATAAACTGCAGGGAGAGCGGATCTCAGGCAACCTGGATGCTCCTGAGG  
GCGGCTTCGATGCCATCCTGCAGACAGCTGTGTGCACGAGGGACATTGGCTGGCGCCCGGACAGCACCCA  
CCTGCTGGTCTTCTCCACCGAGTCAGCCTTCCACTATGAGGCTGATGGCGCCAACGTGCTGGCTGGCATC  
ATGAGCCGCAACGATGAACGGTGCCACCTGGACACCACGGGCACCTACACCCAGTACAGGACACAGGACT  
ACCCGTCGGTGCCACCCCTGGTGCGCCTGCTCGCCAAGCACAACATCATCCCCATCTTTGCTGTACCAA  
CTACTCCTATAGCTACTACGAGAAGCTTCACACCTATTTCCCTGTCTCCTCACTGGGGGTGCTGCAGGAG  
GACTCGTCCAACATCGTGGAGCTGCTGGAGGAGGCCTTCAATCGGATCCGCTCCAACCTGGACATCCGGG  
CCCTAGACAGCCCCGAGGCCTTCGGACAGAGGTCACCTCCAAGATGTTCCAGAAGACGAGGACTGGGTC  
CTTTCACATCCGGCGGGGGGAAGTGGGTATATACCAGGTGCAGCTGCGGGCCCTTGAGCACGTGGATGGG  
ACGCACGTGTGCCAGCTGCCGGAGGACCAGAAGGGCAACATCCATCTGAAACCTTCCTTCTCCGACGGCC  
TCAAGATGGACGCGGGCATCATCTGTGATGTGTGCACCTGCGAGCTGCAAAAAGAGGTGCGGTCAGCTCG  
CTGCAGCTTCAACGGAGACTTCGTGTGCGGACAGTGTGTGTGCAGCGAGGGCTGGAGTGGCCAGACCTGC  
AACTGCTCCACCGGCTCTCTGAGTGACATTCAGCCCTGCCTGCGGGAGGGCGAGGACAAGCCGTGCTCCG  
GCCGTGGGGAGTGCCAGTGCGGGCACTGTGTGTGCTACGGCGAAGGCCGCTACGAGGGTCAGTTCTGCGA  
GTATGACAACTTCCAGTGTCCTCCGCACTTCCGGGTTCTCTGCAATGACCGAGGACGCTGCTCCATGGGC  
CAGTGTGTGTGTGAGCCTGGTTGGACAGGCCCAAGCTGTGACTGTCCCCTCAGCAATGCCACCTGCATCG  
ACAGCAATGGGGGCATCTGTAATGGACGTGGCCACTGTGAGTGTGGCCGCTGCCACTGCCACCAGCAGTC  
GCTCTACACGGACACCATCTGCGAGATCAACTACTCGGCGATCCACCCGGGCCTCTGCGAGGACCTACGC  
TCCTGCGTGCAGTGCCAGGCGTGGGGCACCGGCGAGAAGAAGGGGCGCACGTGTGAGGAATGCAACTTCA  
AGGTCAAGATGGTGGACGAGCTTAAGAGAGCCGAGGAGGTGGTGGTGCGCTGCTCCTTCCGGGACGAGGA  
TGACGACTGCACCTACAGCTACACCATGGAAGGTGACGGCGCCCCTGGGCCCAACAGCACTGTCCTGGTG  
CACAAGAAGAAGGACTGCCCTCCGGGCTCCTTCTGGTGGCTCATCCCCCTGCTCCTCCTCCTGCCGC  
TCCTGGCCCTGCTACTGCTGCTATGCTGGAAGTACTGTGCCTGCTGCAAGGCCTGCCTGGCACTTCTCCC  
GTGCTGCAACCGAGGTCACATGGTGGGCTTTAAGGAAGACCACTACATGCTGCGGGAGAACCTGATGGCC

TCTGACCACTTGGACACGCCCATGCTGCGCAGCGGGAACCTCAAGGGCCGTGACGTGGTCCGCTGGAAGG  
TCACCAACAACATGCAGCGGCCTGGCTTTGCCACTCATGCCGCCAGCATCAACCCACAGAGCTGGTGCC  
CTACGGGCTGTCCTTGCGCCTGGCCCGCCTTTGCACCGAGAACCTGCTGAAGCCTGACACTCGGGAGTGC  
GCCCAGCTGCGCCAGGAGGTGGAGGAGAACCTGAACGAGGTCTACAGGCAGATCTCCGGTGTACACAAGC  
TCCAGCAGACCAAGTTCCGGCAGCAGCCCAATGCCGGGAAAAAGCAAGACCACACCATTGTGGACACAGT  
GCTGATGGCGCCCCGCTCGGCCAAGCCGGCCCTGCTGAAGCTTACAGAGAAGCAGGTGGAACAGAGGGCC  
TTCCACGACCTCAAGGTGGCCCCGGCTACTACACCCTCACTGCAGACCAGGACGCCCGGGGCATGGTGG  
AGTTCCAGGAGGGCGTGGAGCTGGTGGACGTACGGGTGCCCTCTTTATCCGGCCTGAGGATGACGACGA  
GAAGCAGCTGCTGGTGGAGGCCATCGACGTGCCCGCAGGCACTGCCACCCTCGGCCGCCGCTGGTAAAC  
ATCACCATCATCAAGGAGCAAGCCAGAGACGTGGTGTCTTTGAGCAGCCTGAGTTCTCGGTCAGCCGCG  
GGGACCAGGTGGCCCGCATCCCTGTCATCCGGCGTGTCTGGACGGCGGGAAGTCCCAGGTCTCCTACCG  
CACACAGGATGGCACCGCGCAGGGCAACCGGGACTACATCCCCGTGGAGGGTGAGCTGCTGTTCCAGCCT  
GGGGAGGCCTGGAAAGAGCTGCAGGTGAAGCTCCTGGAGCTGCAAGAAGTTGACTCCCTCCTGCGGGGCC  
GCCAGGTCCGCCGTTTCCACGTCCAGCTCAGCAACCCTAAGTTTGGGGCCACCTGGGCCAGCCCCACTC  
CACCACCATCATCATCAGGGACCCAGATGAACTGGACCGGAGCTTCACGAGTCAGATGTTGTCATCACAG  
CCACCCCTCACGGCGACCTGGGCGCCCCGAGAACCCCAATGCTAAGGCCGCTGGGTCCAGGAAGATCC  
ATTTCAACTGGCTGCCCCCTTCTGGCAAGCCAATGGGGTACAGGGTAAAGTACTGGATTACGGGTGACTC  
CGAATCCGAAGCCCACCTGCTCGACAGCAAGGTGCCCTCAGTGGAGCTCACCAACCTGTACCCGTATTGC  
GACTATGAGATGAAGGTGTGCGCCTACGGGGCTCAGGGCGAGGGACCCTACAGCTCCCTGGTGTCTGCC  
GCACCCACCAGGAAGTGCCAGCGAGCCAGGGCGTCTGGCCTTCAATGTCGTCTCCTCCACGGTGACCCA  
GCTGAGCTGGGCTGAGCCGGCTGAGACCAACGGTGAGATCACAGCCTACGAGGTCTGCTATGGCCTGGTC  
AACGATGACAACCGACCTATTGGGCCCATGAAGAAAGTGCTGGTTGACAACCCTAAGAACCGGATGCTGC  
TTATTGAGAACCTTCGGGAGTCCCAGCCCTACCGCTACACGGTGAAGGCGCGCAACGGGGCCGGCTGGGG  
GCCTGAGCGGGAGGCCATCATCAACCTGGCCACCCAGCCCAAGAGGCCCATGTCCATCCCCATCATCCCT  
GACATCCCTATCGTGGACGCCAGAGCGGGGAGGACTACGACAGCTTCCTTATGTACAGCGATGACGTTT

TACGCTCTCCATCGGGCAGCCAGAGGCCAGCGTCTCCGATGACACTGGCTGCGGCTGGAAGTTCGAGCC  
CCTGCTGGGGGAGGAGCTGGACCTGCGGCGCGTCACGTGGCGGCTGCCCCGGAGCTCATCCCGCGCCTG  
TCGGCCAGCAGCGGGCGCTCCTCCGACGCCGAGGCGCCCCACGGGCCCCCGGACGACGGCGGCGCGGGCG  
GGAAGGGCGGCAGCCTGCCCCGAGTGCGACACCCGGGCCCCCGGAGAGCACCTGGTGAATGGCCGGAT  
GGACTTTGCCTTCCCGGGCAGCACCAACTCCCTGCACAGGATGACCACGACCACTGCTGCTGCCTATGGC  
ACCCACCTGAGCCACACGTGCCCCACCGCGTGCTAAGCACATCCTCCACCCTCACACGGGACTACAACT  
CACTGACCCGCTCAGAACTCACA CTGACCACACTGCCAGGGACTACTCCACCCTCACCTCCGTCTC  
CTCCACGACTCTCGCCTGACTGCTGGTGTGCCCACACGCCCACCGCCTGGTGTCTCTGCCCTGGGG  
CCCACATCTCTCAGAGTGAGCTGGCAGGAGCCGCGGTGCGAGCGGCCGCTGCAGGGCTACAGTGTGGAGT  
ACCAGCTGCTGAACGGCGGTGAGCTGCATCGGCTCAACATCCCCAACCTGCCAGACCTCGGTGGTGGT  
GGAAGACCTCTGCCCAACCACTCCTACGTGTTCCGCGTGCGGGCCAGAGCCAGGAAGGCTGGGGCCGA  
GAGCGTGAGGGTGT CATCACCATTGAATCCCAGGTGCACCCGAGAGCCCACTGTGTCCCCTGCCAGGCT  
CCGCCTTCACTTTGAGCACTCCCAGTGCCCCAGGCCCGCTGGTGTTCCTGACCTGAGCCCAGACTCGCT  
GCAGCTGAGCTGGGAGCGGCCACGGAGGCCCAATGGGGATATCGTCGGCTACCTGGTGACCTGTGAGATG  
GCCCAAGGAGGAGGGCCAGCCACCGCATTCCGGGTGGATGGAGACAGCCCCGAGAGCCGGCTGACCGTGC  
CGGGCCTCAGCGAGAACGTGCCCTACAAGTTCAAGGTGCAGGCCAGGACCACTGAGGGCTTCGGGGCCAGA  
GCGCGAGGGCATCATCACCATAGAGTCCCAGGATGGAGGACCCTTCCCGCAGCTGGGCAGCCGTGCCGGG  
CTCTTCCAGCACCCGCTGCAAAGCGAGTACAGCAGCATCACCACCACCCACACCAGCGCCACCGAGCCCT  
TCCTAGTGGATGGGCTGACCCTGGGGGCCAGCACCTGGAGGCAGGCGGCTCCCTCACCCGGCATGTGAC  
CCAGGAGTTTGTGAGCCGGACACTGACCACCAGCGGAACCCTTAGCACCCACATGGACCAACAGTTCTTC  
CAAACCTGA

>|cl|NM\_002222.7\_cds\_NP\_002213.5\_1 [gene=ITPR1] [db\_xref=CCDS:CCDS54550.1] [protein=inositol 1,4,5-trisphosphate receptor type 1 isoform 2] [protein\_id=NP\_002213.5] [location=351..8438] [gbkey=CDS]

ATGTCTGACAAAATGTCTAGCTTCCTACATATTGGAGACATTTGTTCTCTGTACGCGGAGGGATCGACAA  
ATGGATTATTAGCACCTTGGGCCTGGTTGATGATCGTTGTGTTGTACAGCCAGAAACCGGGGACCTTAA  
CAATCCACCTAAGAAATTCAGAGACTGCCTCTTTAAGCTATGTCCCATGAACCGCTACTCTGCCAAAAG  
CAGTTCTGGAAAGCCGCTAAGCCTGGGGCCAACAGCACACAGACGCAGTGCTACTCAACAACTGCACC  
ACGCTGCAGACTTGAAAAAGAAGCAGAATGAGACAGAAAACAGGAAATTGCTGGGGACCGTAATCCAGTA  
TGGCAATGTGATCCAGCTCCTGCATTTGAAAAGTAATAAATACCTAACAGTGAATAAGAGGCTTCCTGCT  
CTGTTGGAGAAGAATGCCATGAGAGTCACATTGGACGAGGCTGGAAATGAAGGGTCTGGTTTTATATTC  
AGCCATTCTACAAGCTGCGATCCATTGGAGACAGCGTGGTCATAGGTGACAAGGTGGTTCTGAACCCCGT  
CAATGCTGGTCAGCCCCTACATGCTAGCAGCCATCAACTGGTAGATAACCCAGGCTGCAATGAGGTCAAT  
TCCGTCAACTGCAATACAAGCTGGAAAATAGTCCTTTTCATGAAATGGAGTGATAACAAAGACGACATAT  
TAAAGGGGGGTGACGTGGTGAGGCTGTTTCATGCTGAGCAGGAGAAGTTTCTCACCTGTGACGAACACAG  
GAAGAAGCAGCACGTCTTCCTGAGAACCACGGGCCGGCAGTCGGCCACATCTGCCACCAGTTCAAAGGCC  
CTGTGGGAGGTGGAGGTGGTCCAGCATGACCCATGTCGGGGCGGAGCAGGGTATTGGAACAGCCTTTTCC  
GTTTCAAGCATCTGGCCACGGGGCATTACTTGGCAGCAGAGGTGGACCCTGATCAGGACGCCTCTCGAAG  
TAGGTTGCGGAATGCCCAAGAAAAGATGGTATACTCCCTGGTCTCTGTGCCTGAAGGCAATGACATCTCC  
TCCATTTTCGAGCTAGATCCCACCACTCTGCGTGGAGGTGACAGCCTTGTCCTCAAGGAACTCTTATGTTCC  
GGCTCAGACACCTATGTACTAATACCTGGGTTCACAGCACAAATATTCCTATTGACAAGGAAGAAGAAAA  
GCCCCGTGATGCTGAAAATTGGCACCTCTCCTGTGAAGGAGGATAAGGAAGCATTGCCATAGTTCCGGTT  
TCTCCTGCTGAAGTTCGGGACCTGGACTTTGCCAATGATGCCAGCAAGGTGCTGGGCTCATTGCTGGGA  
AGCTAGAGAAGGGCACCATCACCCAGAATGAAAGGAGGTCTGTAACCAAGCTGCTAGAAGATTTGGTTTA  
CTTCGTCAGTGGTGGAATAATTCTGGTCAAGATGTTCTCGAAGTTGTCTTCTCAAGCCCAACAGAGAA  
CGGCAGAACTGATGAGAGAACAGAATATTCTCAAGCAGATCTTCAAGTTGTTACAAGCCCCATTACAG  
ACTGCGGTGATGGCCCAATGCTTCGGCTGGAAGAGCTCGGGGACCAGCGGCACGCTCCTTCAGACACAT

CTGCCGGCTCTGCTACAGGGTGCTGAGACACTCGCAGCAAGACTACAGGAAGAACCAGGAGTATATAGCC  
AAGCAGTTTGGCTTCATGCAGAAGCAGATTGGCTATGATGTGTTGGCTGAAGACACTATCACTGCCCTGC  
TCCACAATAATCGGAACTCCTGGAAAAACACATTACCGCGGCAGAGATTGACACATTTGTCAGCCTGGT  
GCGAAAGAACAGGGAGCCCAGATTCTTAGATTACCTCTCCGACCTCTGTGTCTCCATGAACAAATCAATT  
CCAGTGACCCAGGAAGTATGTAAAGCTGTGCTGAACCCACCAACGCTGACATCCTGATTGAGACCA  
AGTTGGTTCTTTCTCGTTTTGAATTTGAAGGTGTCTCTTCCACTGGAGAGAATGCTCTGGAGGCAGGAGA  
AGACGAGGAAGAGGTGTGGCTGTTTTGGAGGGACAGCAACAAAGAGATTGCGAGCAAGAGTGTGAGGGAA  
TTGGCTCAGGATGCTAAAGAAGGGCAGAAGGAGGACCGAGACGTTCTCAGCTACTACAGATATCAGCTGA  
ACCTCTTTGCGAGGATGTGTCTGGACCGCCAATACCTGGCCATCAACGAAATCTCAGGCCAGCTGGATGT  
CGATCTCATTCTCCGCTGCATGTCTGACGAGAACCTGCCCTATGACCTCAGGGCGTCCTTCTGCCGCCTC  
ATGCTTCACATGCATGTGGACCGAGATCCCCAGGAACAAGTCACCCCCGTGAAATATGCCCGCCTCTGGT  
CGGAGATTCCCTCGGAGATCGCCATTGACGACTATGATAGTAGTGGAGCTTCAAAGATGAAATTAAGGA  
GAGATTTGCTCAGACCATGGAGTTTGTGGAGGAGTATTTAAGAGATGTGGTTTGTGAGAGGTTCCCTTTC  
TCTGATAAAGAGAAGAATAAGCTTACGTTTGAGGTTGTAAATTTAGCTAGGAATCTCATATACTTTGGTT  
TCTACAACCTTCTCTGACCTTCTACGATTAACCTAAGATCCTTCTGGCCATATTGGACTGTGTACATGTGAC  
AACAATCTTCCCCATTAGCAAGATGGCGAAAGGAGAAGAGAATAAAGGCAGTAACGTGATGAGATCTATT  
CATGGCGTGGGAGAGCTGATGACCCAGGTGGTGCTCCGGGGAGGAGGCTTTTTGCCCATGACTCCCATGG  
CTGCTGCCCCCTGAAGGCAATGTGAAGCAGGCAGAGCCTGAGAAGGAGGACATCATGGTCATGGACACCAA  
GCTGAAGATCATTGAGATACTCCAGTTTATTTTGAATGTGAGGTTGGATTATAGGATCTCCTGCCTCCTG  
TGTATATTTAAGCGAGAGTTTGATGAAAGCAATTCCAGACTTCAGAAACATCCTCCGAAACAGCAGCC  
AAGAAGGGCCAAGTAATGTACCAGGTGCTCTTGACTTTGAACACATTGAAGAACAAGCAGAAGGCATCTT  
TGGAGGAAGTGAGGAGAACACCCCACTGGACTTGGATGACCACGGCGGCAGAACCTTTCTCCGTGTCCTG  
CTCCACTTGACGATGCATGACTACCCACCCCTGGTGTCAGGGGGCCCTGCAGCTCCTTCTCCGGCACTTCA  
GCCAGAGGCAGGAGGTGCTCCAGGCCTTCAAACAGGTTCAACTGCTGGTTACCAGCCAAGATGTGGACAA  
CTACAAACAGATCAAACAAGACTTGGATCAACTGAGGTCCATCGTGAAAAAGTCAGAGCTTTGGGTGTAC

AAAGGGCAGGGCCCCGATGAGACTATGGATGGTGCATCTGGAGAAAATGAACATAAGAAAACGGAGGAGG  
GAAATAACAAGCCACAAAAGCATGAAAGCACCAGCAGCTACAACCTACAGAGTGGTCAAAGAGATTTTGAT  
TCGGCTTAGCAAACCTCTGTGTTCAAGAGAGTGCCTCAGTGAGAAAGAGCAGGAAGCAGCAACAGCGTCTG  
CTCCGGAACATGGGCGCGCACGCCGTGGTGCTGGAGCTGCTGCAGATTCCCTATGAGAAGGCCGAAGATA  
CCAAGATGCAAGAGATAATGAGGTTGGCTCATGAATTTTTGCAGAATTTCTGCGCAGGCAACCAGCAGAA  
TCAAGCTTTGCTACATAAAACATAAACCTGTTTCTCAACCCAGGGATCCTGGAGGCAGTAACCATGCAG  
CACATCTTCATGAACAATTTCCAGCTTTGCAGTGAGATCAACGAGAGAGTTGTTTCAGCACTTCGTTCACT  
GCATAGAGACTCACGGTCGGAATGTCCAGTATATAAAGTTCTTACAGACAATTGTCAAGGCAGAAGGGAA  
ATTTATTAATAAATGCCAAGACATGGTTATGGCCGAGCTGGTCAATTCGGGAGAGGATGTCCTCGTGTTT  
TACAACGACAGAGCCTCTTTCAGACTCTGATCCAGATGATGCGGTCAGAACGGGATCGGATGGATGAGA  
ACAGCCCTCTCATGTACCACATCCACTTGGTCGAGCTCCTGGCTGTGTGCACGGAGGGTAAGAATGTCTA  
CACAGAGATCAAGTGCAACTCCCTGCTCCCGCTGGATGACATCGTTCGCGTGGTGACCCACGAGGACTGC  
ATCCCTGAGGTTAAATGCATACATTAACCTCCTGAATCACTGCTATGTGGATACAGAGGTGGAAATGA  
AGGAGATTTATACCAGCAATCACATGTGGAAATTGTTTGAGAATTTCTTGAGACATCTGCAGGGCCTG  
TAACAACACTAGTGACAGGAAACATGCAGACTCGATTTTGGAGAAGTATGTCACCGAAATCGTCATGAGT  
ATTGTTACTACTTTCTTCAGCTCTCCCTTCTCAGACCAGAGTACGACTTTGCAGACTCGCCAGCCTGTCT  
TTGTGCAACTGCTGCAAGGCGTGTTTCAGGGTTTACCACTGCAACTGGTTAATGCCAAGCCAAAAAGCCTC  
CGTGGAGAGCTGTATTCGGGTGCTGTCTGATGTAGCCAAGAGCCGGGCCATTGCCATTCCCGTGGACCTG  
GACAGCCAAGTCAACAACCTCTTCTCAAGTCCCACAGCATTGTGCAGAAAACAGCCATGAACTGGCGGC  
TCTCAGCCCGCAATGCCGCACGCAGGGACTCTGTTCTGGCAGCTTCCAGAGACTACCGGAATATCATTGA  
GAGATTGCAGGACATCGTCTCCGCGCTGGAGGACCGTCTCAGGCCCTGGTGACGGCAGAGTTATCTGTG  
CTCGTGGATGTTCTCCACAGACCCGAGCTGCTTTTCCAGAGAACACAGACGCCAGAAGGAAATGTGAAA  
GTGGCGGTTTCATTTGCAAGTTAATAAAGCATACAAAACAGCTGCTAGAAGAAAATGAAGAGAAGCTCTG  
CATTAAGGTCCTACAGACCCTGAGGGAAATGATGACCAAAGATAGAGGCTATGGAGAAAAGGGTGAGGCG  
CTCAGGCAAGTTCTGGTCAACCGTTACTATGGAAACGTCAGACCTTCGGGACGAAGAGAGAGCCTTACCA

GCTTTGGCAATGGCCCACTGTCAGCAGGAGGACCCGGCAAGCCCGGGGAGGAGGGGGAGGTTCCGGATC  
CAGCTCTATGAGCAGGGGTGAGATGAGTCTGGCCGAGGTTCA GTGTACCTTGACAAGGAGGGGGCTTCC  
AATCTAGTTATCGACCTCATCATGAACGCATCCAGTGACCGAGTGTTCCATGAAAGCATTCTCCTGGCCA  
TTGCCCTTCTGGAAGGAGGCAACACCACCATCCAGCACTCCTTTTTCTGTCGCTTGACAGAAGATAAGAA  
GTCAGAGAAATTCTTTAAGGTGTTTTATGACCGGATGAAGGTGGCCAGCAAGAAATCAAAGCAACAGTG  
ACAGTGAACACCAGTGACTTGGGAAATAAAAAAGAAAGACGATGAGGTAGACAGGGATGCCCCATCACGGA  
AAAAAGCTAAAGAGCCCAACACAGATAACAGAAGAGGTCCGGGATCAGCTCCTGGAGGCCTCCGCTGC  
CACCAGGAAAGCCTTCACCACTTCAGGAGGGAGGCTGATCCCGACGACCACTACCAGCCTGGAGAGGGC  
ACCCAGGCCACTGCCGACAAGGCCAAGGACGACCTGGAGATGAGCGCGGTCATCACCATCATGCAGCCCA  
TCCTCCGCTTCCTTCAGCTCCTGTGTGAAAACCACAACCGAGACCTGCAGAACTTCCTCCGTTGCCAAAA  
TAACAAGACCAACTACAATTTGGTATGTGAGACCCTGCAGTTTCTGGACTGTATTTGTGGAAGCACAACT  
GGAGGCCTTGGTCTTCTGGGCTTGTATATAAATGAAAAGAATGTAGCGCTTATCAACCAAACCCTGGAAA  
GTCTGACCGAATACTGTCAAGGACCTTGCCATGAGAACCAGAACTGCATAGCCACCCATGAATCCAATGG  
CATTGACATCATCACAGCCCTGATCCTCAATGATATCAATCCTTTGGGAAAGAAGAGGATGGACCTTGTG  
TTAGAACTGAAGAACAATGCCTCGAAGTTGCTCCTGGCCATCATGGAAAGCAGGCACGACAGTGAAAACG  
CAGAGAGGATACTTTATAACATGAGGCCCAAGGAACTGGTGGAAGTGATCAAGAAAGCCTACATGCAAGG  
TGAAGTGGAATTTGAGGATGGAGAAAACGGTGAGGATGGGGCGGCGTCCCCAGGAACGTGGGGCACAAAC  
ATCTACATATTAGCCCATCAGTTGGCTCGGCATAACAAAGAACTTCAGAGCATGCTGAAACCTGGTGGCC  
AAGTGGACGGAGATGAAGCCCTGGAGTTTTATGCCAAGCACACGGCGCAGATAGAGATTGTCAGATTAGA  
CCGAACAATGGAACAGATAGTCTTTCCCGTGCCAGCATATGTGAATTCCTAACCAAGGAGTCAAACTA  
CGAATTTACTATACTACAGAGAGAGACGAACAAGGCAGCAAAATCAATGATTTCTTTCTGCGGTCTGAAG  
ACCTCTTCAATGAAATGAATTGGCAGAAGAACTGAGAGCCCAGCCCGTGTGTACTGGTGTGCCCCGAA  
CATGTCTTTCTGGAGCAGCATTTCTGTTAACCTGGCCGTCTGATGAACCTGCTGGTGGCGTTTTTCTAC  
CCGTTTAAGGGAGTCCGAGGAGGAACCCTGGAGCCCCACTGGTCGGGACTCCTGTGGACAGCCATGCTCA  
TCTCTCTGGCCATCGTCATTGCCCTCCCCAAGCCCCATGGCATCCGGGCCTTAATTGCCTCCACAATTCT

ACGACTGATATTTTCAGTCGGGTTACAACCCACGTTGTTTCTTCTGGGCGCTTTCAATGTATGCAATAAA  
ATCATCTTTCTAATGAGCTTTGTGGGCAACTGTGGGACATTCACAAGAGGCTACCGAGCCATGGTTCTGG  
ATGTTGAGTTCCTCTATCATTTGTTGTATCTGGTGATCTGTGCCATGGGGCTCTTGTCCATGAATTCTT  
CTACAGTCTGCTGCTTTTTGATTTAGTGTACAGAGAAGAGACTTTGCTTAATGTCATTAAGTGTCACT  
CGCAATGGACGGTCCATCATCTGACAGCAGTTCTGGCTCTGATCCTCGTTTACCTGTTCTCAATAGTGG  
GCTATCTTTTCTTCAAGGATGACTTTATCTTGGAAGTAGATAGGCTGCCCAATGAAACAGCTGTTCCAGA  
AACCGGCGAGAGTTTGGCAAGCGAGTTCCTGTTCTCCGATGTGTGTAGGGTGGAGAGTGGGGAGAACTGC  
TCCTCTCCTGCACCCAGAGAAGAGCTGGTCCCTGCAGAAGAGACGGAACAGGATAAAGAGCACACATGTG  
AGACGCTGCTGATGTGCATTGTCACTGTGCTGAGTCACGGGCTGCGGAGCGGGGTGGAGTAGGAGATGT  
ACTCAGGAAGCCGTCCAAAGAGGAACCCCTGTTTGCTGCTAGAGTTATTTATGACCTCTTGTCTTCTTC  
ATGGTCATCATCATTGTTCTTAACCTGATTTTTGGGGTTATCATTGACACTTTTGCTGACCTGAGGAGTG  
AGAAGCAGAAGAAGGAAGAGATCTTGAAGACCACGTGCTTTATCTGTGGCTTGAAAGAGACAAGTTTGA  
CAACAAGACTGTCACCTTTGAAGAGCACATCAAGGAAGAACACAACATGTGGCACTATCTGTGCTTCATC  
GTCCTGGTGAAAGTAAAGGACTCCACCGAATATACTGGGCCTGAGAGTTACGTGGCAGAAATGATCAAGG  
AAAGAAACCTTGACTGGTTCCCGAGGATGAGAGCCATGTCATTGGTCAGCAGTGATTCTGAAGGAGAACA  
GAATGAGCTGAGAAACCTGCAGGAGAAGCTGGAGTCCACCATGAACTTGTCACGAACCTTTCTGGCCAG  
CTGTCGGAATTAAAGGATCAGATGACAGAACAAAGGAAGCAGAAACAAAGAATTGGTCTTCTAGGACATC  
CTCCTCACATGAATGTCAACCCACAACAACCAGCATAA

>|cl|NM\_004521.3\_cds\_NP\_004512.1\_1 [gene=KIF5B] [db\_xref=CCDS:CCDS7171.1] [protein=kinesin-1  
heavy chain] [protein\_id=NP\_004512.1] [location=453..3344] [gbkey=CDS]

ATGGCGGACCTGGCCGAGTGCAACATCAAAGTGATGTGTCGCTTCAGACCTCTCAACGAGTCTGAAGTGA  
ACCGCGGCGACAAGTACATCGCCAAGTTTCAGGGAGAAGACACGGTCGTGATCGCGTCCAAGCCTTATGC

ATTTGATCGGGTGTTCAGTCAAGCACATCTCAAGAGCAAGTGTATAATGACTGTGCAAAGAAGATTGTT  
AAAGATGTACTTGAAGGATATAATGGAACAATATTTGCATATGGACAAACATCCTCTGGGAAGACACACA  
CAATGGAGGGTAAACTTCATGATCCAGAAGGCATGGGAATTATTCCAAGAATAGTGCAAGATATTTTTAA  
TTATATTTACTCCATGGATGAAAATTTGGAATTTCATATTAAGGTTTCATATTTGAAATATATTTGGAT  
AAGATAAGGGACCTGTTAGATGTTTCAAAGACCAACCTTTTCAGTTCATGAAGACAAAACCGAGTTCCTT  
ATGTAAAGGGGTGCACAGAGCGTTTTGTATGTAGTCCAGATGAAGTTATGGATACCATAGATGAAGGAAA  
ATCCAACAGACATGTAGCAGTTACAAATATGAATGAACATAGCTCTAGGAGTCACAGTATATTTCTTATT  
AATGTCAAACAAGAGAACACACAAACGGAACAAAAGCTGAGTGGAAAACTTTATCTGGTTGATTTAGCTG  
GTAGTGAAAAGGTTAGTAAACTGGAGCTGAAGGTGCTGTGCTGGATGAAGCTAAAAACATCAACAAGTC  
ACTTTCTGCTCTTGAAATGTTATTTCTGCTTTGGCTGAGGGTAGTACATATGTTCCATATCGAGATAGT  
AAAATGACAAGAATCCTTCAAGATTCATTAGGTGGCAACTGTAGAACCACTATTGTAATTTGCTGCTCTC  
CATCATCATACAATGAGTCTGAAACAAAATCTACACTCTTATTTGGCCAAAGGGCCAAAAACAATTAAGAA  
CACAGTTTGTGTCAATGTGGAGTTAACTGCAGAACAGTGGAAAAAGAAGTATGAAAAGAAAAAGAAAAA  
AATAAGATCCTGCGGAACACTATTCAGTGGCTTGAAAATGAGCTCAACAGATGGCGTAATGGGGAGACGG  
TGCCTATTGATGAACAGTTTGACAAAGAGAAAGCCAACTTGGAAGCTTTCACAGTGGATAAAGATATTAC  
TCTTACCAATGATAAACCAGCAACCGCAATTGGAGTTATAGGAAATTTTACTGATGCTGAAAGAAGAAAG  
TGTGAAGAAGAAATTGCTAAATTATACAAACAGCTTGATGACAAGGATGAAGAAATTAACCAGCAAAGTC  
AACTGGTAGAGAACTGAAGACGCAAATGTTGGATCAGGAGGAGCTTTTGGCATCTACCAGAAGGGATCA  
AGACAATATGCAAGCTGAGCTGAATCGCCTTCAAGCAGAAAATGATGCCTCTAAAGAAGAAGTGAAAGAA  
GTTTTACAGGCCCTAGAAGAACTTGCTGTCAATTATGATCAGAAGTCTCAGGAAGTTGAAGACAAAATA  
AGGAATATGAATTGCTTAGTGATGAATTGAATCAGAAATCGGCAACTTTAGCGAGTATAGATGCTGAGCT  
TCAGAACTTAAGGAAATGACCAACCACCAGAAAAAACGAGCAGCTGAGATGATGGCATCTTTACTAAAA  
GACCTTGCAGAAATAGGAATTGCTGTGGGAAATAATGATGTAAAGCAGCCTGAGGGAACCTGGCATGATAG  
ATGAAGAGTTCACTGTTGCAAGACTCTACATTAGCAAAATGAAGTCAGAAGTAAAAACCATGGTGAAACG  
TTGCAAGCAGTTAGAAAGCACACAACTGAGAGCAACAAAAAATGGAAGAAAATGAAAAGGAGTTAGCA

GCATGTCAGCTTCGTATCTCTCAACATGAAGCCAAAATCAAGTCATTGACTGAATACCTTCAAAATGTGG  
AACAAAAGAAAAGACAGTTGGAGGAATCTGTCTGATGCCCTCAGTGAAGAACTAGTCCAGCTTCGAGCACA  
AGAGAAAGTCCATGAAATGGAAAAGGAGCACTTAAATAAGGTTGAGACTGCAAATGAAGTTAAGCAAGCT  
GTTGAACAGCAGATCCAGAGCCATAGAGAACTCATCAAAAACAGATCAGTAGTTTGAGAGATGAAGTAG  
AAGCAAAAGCAAACTTATTACTGATCTTCAAGACCAAAACCAGAAAATGATGTTAGAGCAGGAACGTCT  
AAGAGTAGAACATGAGAAGTTGAAAGCCACAGATCAGGAAAAGAGCAGAAAACACTACATGAACTTACGGTT  
ATGCAAGATAGACGAGAACAAGCAAGACAAGACTTGAAGGGTTTGAAGAGACAGTGGCAAAAGAACTTC  
AGACTTTACACAACCTGCGCAAACCTTTTGTTCAGGACCTGGCTACAAGAGTTAAAAAGAGTGCTGAGAT  
TGATTCTGATGACACCGGAGGCAGCGCTGCTCAGAAGCAAAAAATCTCCTTTCTTGAAAATAATCTTGAA  
CAGCTCACTAAAGTGACAAACAGTTGGTACGTGATAATGCAGATCTCCGCTGTGAACTTCCTAAGTTGG  
AAAAGCGACTTCGAGCTACAGCTGAGAGAGTGAAAGCTTTGGAATCAGCACTGAAAGAAGCTAAAGAAAA  
TGCATCTCGTGATCGCAAACGCTATCAGCAAGAAGTAGATCGCATAAAGGAAGCAGTCAGGTCAAAGAAT  
ATGGCCAGAAGAGGGCATTCTGCACAGATTGCTAAACCTATTCGTCCCGGGCAACATCCAGCAGCTTCTC  
CAACTCACCCAAGTGCAATTCGTGGAGGAGGTGCATTTGTTGAGAACAGCCAGCCAGTGGCAGTGCGAGG  
TGGAGGAGGCAAACAAGTGTA

>|cl|NM\_017644.3\_cds\_NP\_060114.2\_1 [gene=KLHL24] [db\_xref=CCDS:CCDS3246.1] [protein=kelch-like  
protein 24 isoform b] [protein\_id=NP\_060114.2] [location=296..2098] [gbkey=CDS]

ATGGTACTAATATTGGGACGCAGACTAAACAGAGAGGATCTTGGGGTGCGTGATTCCCCAGCAACTAAGC  
GAAAAGTTTTTGAAATGGACCCCAAATCTCTGACAGGTCATGAGTTTTTTGACTTCTCTTCAGGATCATC  
CCATGCCGAAAACATACTCCAGATATTTAATGAATTTCTGTGATAGCCGCTTATTCACAGATGTTATCATT  
TGTGTGGAAGGAAAAGAATTCCTTGCCATAGAGCTGTGCTCTCAGCCTGTAGCAGCTACTTCAGAGCTA  
TGTTTTGTAATGACCACAGGGAAAGCCGAGAAATGTTGGTTGAGATCAATGGTATTTTAGCTGAAGCTAT

GGAATGTTTTTGCAGTATGTTTATACTGGAAAGGTGAAGATCACTACAGAGAATGTACAGTATCTCTTT  
GAGACATCAAGCCTCTTTCAGATTAGTGTTCTCCGTGATGCATGTGCCAAGTTCTTGGAGGAGCAACTTG  
ATCCTTGTAATTGCTTAGGAATCCAGCGCTTTGCTGATACCCATTCACTCAAAACACTCTTCACAAAATG  
CAAAAATTTTGC GTTACAGACTTTTGAGGATGTATCCCAGCACGAAGAATTTCTTGAGCTTGACAAAGAT  
GAACTTATTGATTATATTTGTAGTGATGAACTTGTTATTGGTAAAGAGGAGATGGTTTTTGAAGCCGTCA  
TGCGTTGGGTCTATCGTGCCGTTGATCTGAGAAGACCACTGTTACACGAGCTCCTGACACATGTGAGACT  
CCCTCTGTTGCATCCCACTACTTTGTTCAAACAGTTGAAGTGGACCAATTGATCCAGAATTCTCCTGAG  
TGTTATCAGTTGTTGCATGAAGCAAGACGGTACCACATACTTGGGAATGAAATGATGTCCCCAAGGACTA  
GGCCACGCAGGTCCACTGGCTATTCTGAGGTGATAGTTGTCGTTGGAGGATGTGAGCGAGTTGGAGGATT  
TAATCTTCCATACACTGAGTGCTACGATCCTGTAACAGGAGAATGGAAGTCTTTGGCTAAGCTTCCAGAA  
TTTACCAAATCAGAGTATGCAGTCTGTGCTCTAAGGAATGACATTCTTGTTTCAGGTGGAAGAATCAACA  
GCCGTGATGTCTGGATTTATAACTCACAGTTAAATATTTGGATCAGAGTTGCCTCTCTCAATAAAGGCAG  
ATGGCGTCACAAAATGGCTGTCCTCCTTGGTAAAGTATATGTTGTCGGTGGCTATGATGGGCAAAACAGA  
CTTAGCAGCGTAGAATGTTATGATTCTTTTCAAATCGATGGACTGAAGTTGCTCCCCTTAAGGAAGCCG  
TGAGTTCTCCTGCAGTGACTAGCTGTGTAGGCAAACCTGTTTGTGATTGGTGGAGGACCTGATGATAATAC  
TTGTTCTGATAAGGTTCAATCTTATGATCCAGAAACCAATTCTTGGCTACTTCGTGCAGCTATCCCAATT  
GCCAAAAGGTGTATAACAGCTGTATCCCTAAACAACCTGATCTATGTTGCCGGTGGACTGACCAAGGCAA  
TATACTGTTACGATCCAGTTGAAGATTACTGGATGCACGTACAGAATACATTGAGCCGTCAGGAAAACCTG  
TGGTATGTCTGTGTGTAATGGTAAATATATATCCTGGGCGGAAGACGGGAAAAATGGAGAAGCCACAGAC  
ACTATTCTCTGTTATGATCCTGCAACAAGTATCATCACAGGGGTAGCTGCAATGCCAGGCCAGTGTCTCT  
ATCATGGCTGTGTGACTATTCATAGATACAATGAGAAATGCTTTAAACTCTGA

>|cl|NM\_005561.4\_cds\_NP\_005552.3\_1 [gene=LAMP1] [db\_xref=CCDS:CCDS41909.1]  
[protein=lysosome-associated membrane glycoprotein 1 precursor] [protein\_id=NP\_005552.3]  
[location=197..1450] [gbkey=CDS]

ATGGCGGCCCCGGCAGCGCCCGGCGACCCCTGCTGCTGCTACTGCTGTTGCTGCTGCTCGGCCTCATGC  
ATTGTGCGTCAGCAGCAATGTTTATGGTGAAAAATGGCAACGGGACCGCGTGCATAATGGCCAACTTCTC  
TGCTGCCTTCTCAGTGAACACGACACCAAGAGTGGCCCTAAGAACATGACCTTTGACCTGCCATCAGAT  
GCCACAGTGGTGCTCAACCGCAGCTCCTGTGGAAAAGAGAACAATTCTGACCCCAGTCTCGTGATTGCTT  
TTGGAAGAGGACATACACTCACTCTCAATTTACGAGAAATGCAACACGTTACAGCGTCCAGCTCATGAG  
TTTTGTTTATAACTTGTCAGACACACACCTTTTCCCAATGCGAGCTCCAAAGAAATCAAGACTGTGGAA  
TCTATAACTGACATCAGGGCAGATATAGATAAAAAATACAGATGTGTTAGTGGCACCCAGGTCCACATGA  
ACAACGTGACCGTAACGCTCCATGATGCCACCATCCAGGCGTACCTTTCCAACAGCAGCTTCAGCCGGGG  
AGAGACACGCTGTGAACAAGACAGGCCTTCCCAACACAGCGCCCCCTGCGCCACCCAGCCCCTCGCCC  
TCACCCGTGCCCAAGAGCCCCTCTGTGGACAAGTACAACGTGAGCGGCACCAACGGGACCTGCCTGCTGG  
CCAGCATGGGGCTGCAGCTGAACCTCACCTATGAGAGGAAGGACAACACGACGGTGACAAGGCTTCTCAA  
CATCAACCCCAACAAGACCTCGGCCAGCGGGAGCTGCGGCGCCACCTGGTGACTCTGGAGCTGCACAGC  
GAGGGCACCAACCGTCCTGCTCTTCCAGTTCGGGATGAATGCAAGTTCTAGCCGGTTTTTCTACAAGGAA  
TCCAGTTGAATACAATTCTTCTGACGCCAGAGACCCTGCCTTTAAAGCTGCCAACGGCTCCCTGCGAGC  
GCTGCAGGCCACAGTCGGCAATTCCTACAAGTGCAACGCGGAGGAGCACGTCCGTGTCACGAAGGCGTTT  
TCAGTCAATATATTCAAAGTGTGGGTCCAGGCTTTCAAGGTGGAAGGTGGCCAGTTTGGCTCTGTGGAGG  
AGTGTCTGCTGGACGAGAACAGCATGCTGATCCCCATCGCTGTGGGTGGTGGCCTGGCGGGGCTGGTCCT  
CATCGTCCTCATCGCCTACCTCGTCGGCAGGAAGAGGAGTCACGCAGGCTACCAGACTATCTAG

>|cl|NM\_001122606.1\_cds\_NP\_001116078.1\_1 [gene=LAMP2] [db\_xref=CCDS:CCDS48159.1]  
[protein=lysosome-associated membrane glycoprotein 2 isoform C precursor]  
[protein\_id=NP\_001116078.1] [location=181..1416] [gbkey=CDS]

ATGGTGTGCTTCCGCCTCTCCCGGTTCCGGGCTCAGGGCTCGTTCTGGTCTGCCTAGTCCTGGGAGCTG  
TGCGGTCTTATGCATTGGAACCTAATTTGACAGATTGAGAAAATGCCACTTGCCTTTATGCAAAATGGCA  
GATGAATTTACAGTACGCTATGAACTACAAATAAACTTATAAACTGTAACCATTTGAGACCATGGC  
ACTGTGACATATAATGGAAGCATTTGTGGGGATGATCAGAATGGTCCCAAAATAGCAGTGCAGTTCGGAC  
CTGGCTTTTCTGGATTGCGAATTTTACCAAGGCAGCATCTACTTATTCAATTGACAGCGTCTCATTTTC  
CTACAACACTGGTGATAACACAACATTTCTGATGCTGAAGATAAAGGAATTCTTACTGTTGATGAACTT  
TTGGCCATCAGAATTCATTGAATGACCTTTTTAGATGCAATAGTTTATCAACTTTGGAAAAGAATGATG  
TTGTCCAACACTACTGGGATGTTCTTGTACAAGCTTTTGTCCAAAATGGCACAGTGAGCACAAATGAGTT  
CCTGTGTGATAAAGACAAAACCTTCAACAGTGGCACCCACCATACACACCACTGTGCCATCTCCTACTACA  
ACACCTACTCCAAAGGAAAAACCAGAAGCTGGAACCTATTCAGTTAATAATGGCAATGATACTTGTCTGC  
TGGCTACCATGGGGCTGCAGCTGAACATCACTCAGGATAAGGTTGCTTCAGTTATTAACATCAACCCCAA  
TACAACTCACTCCACAGGCAGCTGCCGTTCTCACACTGCTCTACTTAGACTCAATAGCAGCACCATTAAG  
TATCTAGACTTTGTCTTTGCTGTGAAAAATGAAAACCGATTTTATCTGAAGGAAGTGAACATCAGCATGT  
ATTTGGTTAATGGCTCCGTTTTTCAGCATTGCAAATAACAATCTCAGCTACTGGGATGCCCCCTGGGAAG  
TTCTTATATGTGCAACAAAGAGCAGACTGTTTCAGTGTCTGGAGCATTTGAGATAAATACCTTTGATCTA  
AGGGTTCAGCCTTTCAATGTGACACAAGGAAAGTATTCTACAGCTGAAGAATGTTCTGCTGACTCTGACC  
TCAACTTTCTTATTCCTGTTGCAGTGGGTGTGGCCTTGGGCTTCCTTATAATTGTTGTCTTTATCTCTTA  
TATGATTGGAAGAAGGAAAAAGTCGTAAGTGGTTATCAGTCTGTGTAA

>lcl|NM\_181509.3\_cds\_NP\_852610.1\_1 [gene=MAP1LC3A] [db\_xref=CCDS:CCDS13237.1]  
[protein=microtubule-associated proteins 1A/1B light chain 3A isoform b] [protein\_id=NP\_852610.1]  
[location=147..524] [gbkey=CDS]

ATGAAGATGAGATTCTTCAGTTCTCCATGTGGAAAAGCAGCTGTGGACCCAGCCGACCGCTGTAAGGAGG  
TACAGCAGATCCGCGACCAGCACCCCAGCAAAATCCCGGTGATCATCGAGCGCTACAAGGGTGAGAAGCA  
GCTGCCCCGTCCTGGACAAGACCAAGTTTTTGGTCCCGGACCATGTCAACATGAGCGAGTTGGTCAAGATC  
ATCCGGCGCCGCCTGCAGCTGAACCCACGCAGGCCTTCTTCCTGCTGGTGAACCAGCACAGCATGGTGA  
GTGTGTCCACGCCCATCGCGGACATCTACGAGCAGGAGAAAGACGAGGACGGCTTCTCTATATGGTCTA  
CGCCTCCAGGAAACCTTCGGCTTCTGA

>lcl|NM\_022818.5\_cds\_NP\_073729.1\_1 [gene=MAP1LC3B] [db\_xref=CCDS:CCDS10960.1]  
[protein=microtubule-associated proteins 1A/1B light chain 3B] [protein\_id=NP\_073729.1]  
[location=93..470] [gbkey=CDS]

ATGCCGTCGGAGAAGACCTTCAAGCAGCGCCGCACCTTCGAACAAAGAGTAGAAGATGTCCGACTTATTC  
GAGAGCAGCATCCAACCAAAATCCCGGTGATAATAGAACGATACAAGGGTGAGAAGCAGCTTCTGTTCT  
GGATAAAACAAAGTTCCTTGACCTGACCATGTCAACATGAGTGAGCTCATCAAGATAATTAGAAGGCGC  
TTACAGCTCAATGCTAATCAGGCCTTCTTCCTGTTGGTGAACGGACACAGCATGGTCAGCGTCTCCACAC  
CAATCTCAGAGGTGTATGAGAGTGAGAAAGATGAAGATGGATTCTGTACATGGTCTATGCCTCCAGGA  
GACGTTTCGGGATGAAATTGTCAGTGTA

>|cl|NM\_001004343.3\_cds\_NP\_001004343.1\_1 [gene=MAP1LC3C] [db\_xref=CCDS:CCDS31074.1]  
[protein=microtubule-associated proteins 1A/1B light chain 3C] [protein\_id=NP\_001004343.1]  
[location=91..534] [gbkey=CDS]

ATGCCGCCTCCACAGAAAATCCCAAGCGTCAGACCCTTCAAGCAGAGGAAAAGCTTGGCAATCAGACAAG  
AGGAAGTTGCTGGAATCCGGGCAAAGTTCCCAACAAAATCCCGGTGGTAGTGGAGCGCTACCCAGGGA  
GACGTTCTGCCCCGCTGGACAAAACCAAGTTCCTGGTCCCGCAGGAGCTGACCATGACCCAGTTCCTC  
AGCATCATCCGGAGCCGCATGGTCCTGAGAGCCACGGAAGCCTTTTACTTGCTGGTGAACAACAAGAGCC  
TGGTCAGCATGAGCGCAACCATGGCAGAGATCTACAGAGACTACAAGGATGAGGATGGCTTCGTGTACAT  
GACCTACGCCTCCAGGAGACATTTGGCTGCCTGGAGTCAGCAGCCCCAGGGATGGGAGCAGCCTTGAG  
GACAGACCCTGCAATCCTCTCTAG

>|cl|NM\_001297555.2\_cds\_NP\_001284484.1\_1 [gene=MAP2K7] [db\_xref=CCDS:CCDS74277.1]  
[protein=dual specificity mitogen-activated protein kinase kinase 7 isoform 1]  
[protein\_id=NP\_001284484.1] [location=69..1376] [gbkey=CDS]

ATGGCGGCGTCTCCTGGAACAGAAGCTGTCCCGCCTGGAAGCAAAGCTGAAGCAGGAGAACCGGGAGG  
CCCGGCGGAGGATCGACCTCAACCTGGATATCAGCCCCAGCGGCCAGGCCATTATTGTGATCACTCT  
AAGCCCTGCTCCTGCCCCGTCCCAACGAGCAGCCCTGCAGCTCCCGCTGGCCAACGATGGGGGCAGCCGC  
TCGCCATCCTCAGAGAGCTCCCCGCAGCACCCACGCCCCCGCCGGCCCCGCCACATGCTGGGGCTCC  
CGTCAACCCTGTTACACCCCCGAGCATGGAGAGCATTGAGATTGACCAGAAGCTGCAGGAGATCATGAA  
GCAGACGGGCTACCTGACCATCGGGGGCCAGCGCTACCAGGCAGAAATCAACGACCTGGAGAACTTGGGC  
GAGATGGGCAGCGGCACCTGCGGCCAGGTGTGGAAGATGCGCTTCCGGAAGACCGGCCACGTCATTGCCG  
TTAAGCAAATGCGGCGCTCCGGAACAAGGAGGAGAACAAGCGCATCCTCATGGACCTGGATGTGGTGCT  
GAAGAGCCACGACTGCCCTACATCGTGCAGTGCTTTGGGACGTTTCATACCAACACGGACGTCTTCATC  
GCCATGGAGCTCATGGGCACCTGCGCTGAGAAGCTCAAGAAGCGGATGCAGGGCCCCATCCCCGAGCGCA

TTCTGGGCAAGATGACAGTGGCGATTGTGAAGGCGCTGTACTACCTGAAGGAGAAGCACGGTGTCATCCA  
CCGCGACGTCAAGCCCTCCAACATCCTGCTGGACGAGCGGGGCCAGATCAAGCTCTGCGACTTCGGCATC  
AGCGGCCGCTGGTGGACTCCAAAGCCAAGACGCGGAGCGCCGGCTGTGCCGCTACATGGCACCCGAGC  
GCATTGACCCCCAGACCCACCAAGCCGGACTATGACATCCGGGCCGACGTATGGAGCCTGGGCATCTC  
GTTGGTGGAGCTGGCAACAGGACAGTTTCCCTACAAGAACTGCAAGACGGACTTTGAGGTCCTCACCAA  
GTCCTACAGGAAGAGCCCCGCTTCTGCCCGGACACATGGGCTTCTCGGGGGACTTCCAGTCCTTCGTCA  
AAGACTGCCTTACTAAAGATCACAGGAAGAGACCAAAGTATAATAAGCTACTTGAACACAGCTTCATCAA  
GCGCTACGAGACGCTGGAGGTGGACGTGGCGTCCTGGTTCAAGGATGTCATGGCGAAGACTGAGTCACCG  
CGGACTAGCGGCGTCCTGAGCCAGCCCCACCTGCCCTTCTTCAGGTAG

>|cl|NM\_002745.5\_cds\_NP\_002736.3\_1 [gene=MAPK1] [db\_xref=CCDS:CCDS13795.1]  
[protein=mitogen-activated protein kinase 1] [protein\_id=NP\_002736.3] [location=206..1288]  
[gbkey=CDS]

ATGGCGGCGGCGGCGGCGGCGGGCGCGGGCCCGGAGATGGTCCGCGGGCAGGTGTTGACGTGGGGCCGC  
GCTACACCAACCTCTCGTACATCGGCGAGGGCGCCTACGGCATGGTGTGCTCTGCTTATGATAATGTCAA  
CAAAGTTCGAGTAGCTATCAAGAAAATCAGCCCCTTTGAGCACCAGACCTACTGCCAGAGAACCCTGAGG  
GAGATAAAAATCTTACTGCGCTTCAGACATGAGAACATCATTGGAATCAATGACATTATTCGAGCACCAA  
CCATCGAGCAAATGAAAGATGTATATATAGTACAGGACCTCATGGAAACAGATCTTTACAAGCTCTTGAA  
GACACAACACCTCAGCAATGACCATATCTGCTATTTTCTCTACCAGATCCTCAGAGGGTTAAAATATATC  
CATTAGCTAACGTTCTGCACCGTGACCTCAAGCCTTCCAACCTGCTGCTCAACACCACCTGTGATCTCA  
AGATCTGTGACTTTGGCCTGGCCCGTGTTCAGATCCAGACCATGATCACACAGGGTTCCTGACAGAATA  
TGTGGCCACACGTTGGTACAGGGCTCCAGAAATTATGTTGAATTCCAAGGGCTACACCAAGTCCATTGAT  
ATTTGGTCTGTAGGCTGCATTCTGGCAGAAATGCTTTCTAACAGGCCCATCTTTCCAGGGAAGCATTATC

TTGACCAGCTGAACCACATTTTGGGTATTCTTGGATCCCCATCACAAGAAGACCTGAATTGTATAATAAA  
TTTAAAAGCTAGGAACTATTTGCTTTCTCTCCACACAAAAATAAGGTGCCATGGAACAGGCTGTTCCCA  
AATGCTGACTCCAAAGCTCTGGACTTATTGGACAAAATGTTGACATTCAACCCACACAAGAGGATTGAAG  
TAGAACAGGCTCTGGCCCACCCATATCTGGAGCAGTATTACGACCCGAGTGACGAGCCCATCGCCGAAGC  
ACCATTCAAGTTCGACATGGAATTGGATGACTTGCCTAAGGAAAAGCTCAAAGAACTAATTTTTGAAGAG  
ACTGCTAGATTCCAGCCAGGATACAGATCTTAA

>|cl|NM\_001040056.3\_cds\_NP\_001035145.1\_1 [gene=MAPK3] [db\_xref=CCDS:CCDS42149.1]  
[protein=mitogen-activated protein kinase 3 isoform 2] [protein\_id=NP\_001035145.1]  
[location=12..1085] [gbkey=CDS]

ATGGCGGCGGCGGCGGCTCAGGGGGCGGGGGCGGGGAGCCCCGTAGAACCGAGGGGGTCTGGCCCCGGGG  
TCCCGGGGGAGGTGGAGATGGTGAAGGGGCAGCCGTTGACGTGGGCCCCGCGCTACACGCAGTTGCAGTA  
CATCGGCGAGGGCGCGTACGGCATGGTCAGCTCGGCCTATGACCACGTGCGCAAGACTCGCGTGGCCATC  
AAGAAGATCAGCCCCTTCGAACATCAGACCTACTGCCAGCGCACGCTCCGGGAGATCCAGATCCTGCTGC  
GCTTCGCCATGAGAATGTCATCGGCATCCGAGACATTCTGCGGGCGTCCACCCTGGAAGCCATGAGAGA  
TGTCTACATTGTGCAGGACCTGATGGAGACTGACCTGTACAAGTTGCTGAAAAGCCAGCAGCTGAGCAAT  
GACCATATCTGCTACTTCTCTACCAGATCCTGCGGGGCCTCAAGTACATCCACTCCGCCAACGTGCTCC  
ACCGAGATCTAAAGCCCTCCAACCTGCTCATCAACACCACCTGCGACCTTAAGATTTGTGATTTGGCCT  
GGCCCGGATTGCCGATCCTGAGCATGACCACACCGGCTTCTGACGGAGTATGTGGCTACGCGCTGGTAC  
CGGGCCCCAGAGATCATGCTGAACTCCAAGGGCTATACCAAGTCCATCGACATCTGGTCTGTGGGCTGCA  
TTCTGGCTGAGATGCTCTTAACCGGCCCATCTTCCCTGGCAAGCACTACCTGGATCAGCTCAACCACAT  
TCTGGGCATCCTGGGCTCCCCATCCCAGGAGGACCTGAATTGTATCATCAACATGAAGGCCCGAACTAC  
CTACAGTCTCTGCCCTCCAAGACCAAGGTGGCTTGGGCCAAGCTTTTCCCCAAGTCAGACTCCAAAGCCC

TTGACCTGCTGGACCGGATGTAAACCTTTAACCCCAATAAACGGATCACAGTGGAGGAAGCGCTGGCTCA  
CCCCTACCTGGAGCAGTACTATGACCCGACGGATGAGGTGGGCCAGTCCCCAGCAGCAGTGGGGCTGGGG  
GCAGGGGAGCAGGGGGGCACGTAG

>|cl|NM\_001278547.2\_cds\_NP\_001265476.1\_1 [gene=MAPK8] [db\_xref=CCDS:CCDS7223.1]  
[protein=mitogen-activated protein kinase 8 isoform beta2] [protein\_id=NP\_001265476.1]  
[location=195..1478] [gbkey=CDS]

ATGAGCAGAAGCAAGCGTGACAACAATTTTATAGTGTAGAGATTGGAGATTCTACATTCACAGTCCTGA  
AACGATATCAGAATTTAAACCTATAGGCTCAGGAGCTCAAGGAATAGTATGCGCAGCTTATGATGCCAT  
TCTTGAAAGAAATGTTGCAATCAAGAAGCTAAGCCGACCATTTCAGAATCAGACTCATGCCAAGCGGGCC  
TACAGAGAGCTAGTTCTTATGAAATGTGTTAATCACAAAAATATAATTGGCCTTTTGAATGTTTTACAC  
CACAGAAATCCCTAGAAGAATTTCAAGATGTTTACATAGTCATGGAGCTCATGGATGCAAATCTTGCCA  
AGTGATTAGATGGAGCTAGATCATGAAAGAATGTCCTACCTTCTCTATCAGATGCTGTGTGGAATCAAG  
CACCTTCATTCTGCTGGAATTATTCATCGGGACTTAAAGCCAGTAATATAGTAGTAAAATCTGATTGCA  
CTTTGAAGATTCTTGACTTCGGTCTGGCCAGGACTGCAGGAACGAGTTTTATGATGACGCCTTATGTAGT  
GACTCGCTACTACAGAGCACCCGAGGTCATCCTTGGCATGGGCTACAAGGAAAACGTTGACATTTGGTCA  
GTTGGGTGCATCATGGGAGAAATGATCAAAGGTGGTGTGTTTGTCCAGGTACAGATCATATTGATCAGT  
GGAATAAAGTTATTGAACAGCTTGGAACACCATGTCCTGAATTCATGAAGAACTGCAACCAACAGTAAG  
GACTTACGTTGAAAACAGACCTAAATATGCTGGATATAGCTTTGAGAACTCTCCCTGATGTCCTTTTC  
CCAGCTGACTCAGAACACAACAACTTAAAGCCAGTCAGGCAAGGGATTTGTTATCCAAAATGCTGGTAA  
TAGATGCATCTAAAAGGATCTCTGTAGATGAAGCTCTCCAACACCCGTACATCAATGTCTGGTATGATCC  
TTCTGAAGCAGAAGCTCCACCACCAAAGATCCCTGACAAGCAGTTAGATGAAAGGGAACACACAATAGAA  
GAGTGGAAGAATTGATATATAAGGAAGTTATGGACTTGGAGGAGAGAAACCAAGAATGGAGTTATACGGG

GGCAGCCCTCTCCTTTAGGTGCAGCAGTGATCAATGGCTCTCAGCATCCATCATCATCGTCGTCTGTCAA  
TGATGTGTCTTCAATGTCAACAGATCCGACTTTGGCCTCTGATACAGACAGCAGTCTAGAAGCAGCAGCT  
GGGCCTCTGGGCTGCTGTAGATGA

>|cl|NM\_005456.4\_cds\_NP\_005447.1\_1 [gene=MAPK8IP1] [db\_xref=CCDS:CCDS7916.1] [protein=C-Jun-  
amino-terminal kinase-interacting protein 1] [protein\_id=NP\_005447.1] [location=171..2306]  
[gbkey=CDS]

ATGGCGGAGCGAGAAAGCGGCGGCCTGGGAGGGGGGGCCGCGTCCCCGCCC GCCGCTCCCCGTTCTCTGG  
GGCTGCACATCGCTTCGCCTCCCAATTT CAGGCTCACCCATGACATCAGCCTGGAGGAGTTTGAGGATGA  
AGACCTCTCGGAGATCACTGATGAGTGTGGCATCAGCTTACAGTGCAAAGACACCCTGTCCTTACGGCCC  
CCGCGCGCCGGGCTGCTCTCTGCGGGCGGCGGCGGGCGGGGAGCCGTTGCAGGCCGAGATGCTGCAGA  
TGGACCTGATCGACGCGACGGGGGACACTCCCGGGGCCGAGGACGACGAGGAGGACGACGACGAGGAGCG  
CGCGGCCCGGCGGCCGGGAGCGGGGCCGCCAAGGCCGAGTCCGGCCAGGAGCCGGCGTCCCCGCGGCCAG  
GGCCAGAGCCAAGGCCAGAGCCAGGGCCCCGGGCAGCGGGGACACGTACCGGCCCAAGCGGCCCAACACGC  
TCAACCTCTTTCGCGAGGTGCCGCGGTCTCAGGACACACTGAATAATAATTCTCTGGGCAAAAAGCACAG  
TTGGCAGGATCGGGTGTCTCGATCATCCTCACCCCTGAAGACAGGGGAGCAGACACCACCGCATGAACAC  
ATCTGCCTGAGCGATGAGCTGCCCCCCCAGAGCGGCCCCGCCCCACCACAGATCGAGGCACCTCCACCG  
ACAGCCCTTGCCGCCGAGCACAGCCACCCAGATGGCACCTCCGGGTGGTCCCCCTGCTGCCCCGCCTGG  
GGGTCTGGGGCCACTCGCATCGAGACCGAATCCACTACCAGGCCGATGTGCGACTAGAGGCCACTGAGGAG  
ATCTACCTGACCCCAAGTGCAGAGGGCCCCAGACGCTGCAGAGCCCACCTCCGCCTTCTGCCGCCCACTG  
AGAGCCGGATGTCAGTCAGTCCGATCCAGACCCTGCCGCCTACCCCTCCACGGCAGGGCGGCCGCACCC  
CTCCATCAGTGAAGAGGAAGAGGGCTTCGACTGCCTGTCGTCCCCAGAGCGGGCTGAGCCCCCAGGCGGA  
GGGTGGCGGGGGAGCCTGGGGGAGCCGCCGCCACCTCCACGGGCCTCTCTGAGCTCGGACACCAGCGCCC

TGTCCTATGACTCTGTCAAGTACACGCTGGTGGTAGATGAGCATGCACAGCTGGAGCTGGTGAGCCTGCG  
GCCGTGCTTCGGAGACTACAGTGACGAGAGTGACTCTGCCACCGTCTATGACAACTGTGCCTCCGTCTCC  
TCGCCCTATGAGTCGGCCATCGGAGAGGAATATGAGGAGGCCCCGCGGCCCCAGCCCCCTGCCTGCCTCT  
CCGAGGACTCCACGCTGATGAACCCGACGTCCATTTCTCCAAGAAATTCCTGAACGTCTTCATGAGTGG  
CCGCTCCCGCTCCTCCAGTGCTGAGTCCTTCGGGCTGTTCTCCTGCATCATCAACGGGGAGGAGCAGGAG  
CAGACCCACCGGGCCATATTCAGGTTTGTGCCTCGACACGAAGACGAACTTGAGCTGGAAGTGGATGACC  
CTCTGCTAGTGGAGCTCCAGGCTGAAGACTACTGGTACGAGGCCTACAACATGCGCACTGGTGCCCGGGG  
TGTCTTTCTGCCTATTACGCCATCGAGGTCACCAAGGAGCCCGAGCACATGGCAGCCCTGGCCAAAAAC  
AGTGACTGGGTGGACCAGTTCGGGTGAAGTTCCTGGGCTCAGTCCAGGTTCCCTATCACAAGGGCAATG  
ACGTCCTCTGTGCTGCTATGCAAAAGATTGCCACCACCCGCCGGCTCACCGTGCACTTTAACCCGCCCTC  
CAGCTGTGTCCTGGAGATCAGCGTGCGGGGTGTGAAGATAGGCGTCAAGGCCGATGACTCCCAGGAGGCC  
AAGGGGAATAAATGTAGCCACTTTTTCCAGTTAAAAAACATCTCTTTCTGCGGATATCATCAAAGAACA  
ACAAGTACTTTGGGTTCATCACCAGCACCCCGCCGACCACCGTTTGCCTGCCACGTCTTTGTGTCTGA  
AGACTCCACCAAAGCCCTGGCAGAGTCCGTGGGGAGAGCATTCCAGCAGTTCTACAAGCAGTTTGTGGAG  
TACACCTGCCCCACAGAAGATATCTACCTGGAGTAG

>|cl|NM\_001135044.2\_cds\_NP\_001128516.1\_1 [gene=MAPK9] [db\_xref=CCDS:CCDS47356.1]  
[protein=mitogen-activated protein kinase 9 isoform JNK2 gamma] [protein\_id=NP\_001128516.1]  
[location=284..1012] [gbkey=CDS]

ATGAGCGACAGTAAATGTGACAGTCAGTTTTATAGTGTGCAAGTGGCAGACTCAACCTTCACTGTCCTAA  
AACGTTACCAGCAGCTGAAACCAATTGGCTCTGGGGCCCAAGGGATTGTTTGTGCTGCATTTGATACAGT  
TCTTGGGATAAATGTTGCAGTCAAGAACTAAGCCGTCCTTTTCAGAACCAAACCTCATGCAAAGAGAGCT  
TATCGTGAACCTTGCCTCTTAAATGTGTCAATCATAAAATATAATTAGTTTGTTAAATGTGTTTACAC



CATCTACAGGATTGTCCTGTTACTAATGTGCAAGATTGGAATGAATGTTTAGATACCATCGCCTATGAGC  
CCCAAATTGGTTACTGTATAAGTGCATCAACTTTACAGCAGTTAAGTTTCCCAGTTAGAGCATACAAACG  
ACTAGATGGTTCAACTGAATGCTGTAACAATCACAGCCTCACAGATGTGTGCTTTTCCTACAGAAATAAT  
TTTAATAAGCGTTTGCATACATGTCTTCCTGCCCGGAAAGCAGTTGAAGCAACTCAAGTTTGCAGAACCA  
ATAAAGACTGTAAAAAAGCTCAAGTTCAAGTTTCTGTATAATACCTTCTTTGGAAACTCACACTCGCTT  
AATAAAAGTAAACACCCACCTCAGATTGATATGTTATACGTAGGACATCCTCTGCATCTTCACTACACA  
GTGAGCATCACCAGTTTTATCCACGTTTTAACTTTCTAAGCATAGATCTGCCAGTGGTTGTGGAGACAT  
TTGTCAAGTACCTGATTTCCCTCTCAGGAGCTCTGGCTATTGTTAATGCAGTACCCTGCTTTGCTTTGGA  
TGGACAATGGATTCTAAACTCTTTCTTGGATGCCACCCTTACCTCAGTGATTGGAGACAATGATGTCAAA  
GATCTAATAGGGTTTTTCATCTTGCTGGGTGGCAGTGTACTTTTGGCTGCCAATGTGACCCTGGGACTCT  
GGATGGTTACAGCACGGTAA

>|cl|NM\_022372.6\_cds\_NP\_071767.3\_1 [gene=MLST8] [db\_xref=CCDS:CCDS10462.2] [protein=target of rapamycin complex subunit LST8 isoform a] [protein\_id=NP\_071767.3] [location=115..1095] [gbkey=CDS]

ATGAACACCTCCCCAGGCACGGTGGGCAGTGACCCGGTCATCCTGGCCACTGCAGGCTACGACCACACCG  
TGCGCTTCTGGCAGGCCACAGCGGCATCTGCACCCGGACGGTGCAGCACCAGGACTCCCAGGTGAATGC  
CTTGGAGGTCACACCGGACCGCAGCATGATTGCTGCTGCAGGTTACCAGCACATCCGCATGTATGATCTC  
AACTCCAATAACCCTAACCCCATCATCAGCTACGACGGCGTCAACAAGAACATCGCGTCTGTGGGCTTCC  
ACGAAGACGGCCGCTGGATGTACACGGGCGGCGAGGACTGCACAGCCAGGATCTGGGACCTCAGGTCCCG  
GAACCTGCAGTGCCAGCGGATCTTCCAGGTGAACGCACCCATTAAGTGCCTGTGCCTGCACCCCAACCAG  
GCAGAGCTCATCGTGGGTGACCAGAGCGGGGCTATCCACATCTGGGACTTGAAAACAGACCACAACGAGC  
AGCTGATCCCTGAGCCCGAGGTCTCCATCACGTCCGCCACATCGATCCCGACGCCAGCTACATGGCAGC

TGTCAATAGCACCGGAAACTGCTATGTCTGGAATCTGACGGGGGGCATTGGTGACGAGGTGACCCAGCTC  
ATCCCCAAGACTAAGATCCCTGCCACACGCGCTACGCCCTGCAGTGTGCTTCAGCCCCGACTCCACGC  
TCCTCGCCACCTGCTCGGCTGATCAGACGTGCAAGATCTGGAGGACGTCCAATTCTCCCTGATGACGGA  
GCTGAGCATCAAGAGCGGCAACCCCGGGGAGTCTCCCGCGGCTGGATGTGGGGCTGCGCCTTCTCGGGG  
GACTCCAGTACATCGTCACTGCTTCTCGGACAACCTGGCCCGGCTCTGGTGTGTGGAGACTGGAGAGA  
TCAAGAGAGAGTATGGCGGCCACCAGAAGGCTGTTGTCTGCCTGGCCTTCAATGACAGTGTGCTGGGCTA  
G

>|cl|NM\_022485.5\_cds\_NP\_071930.2\_1 [gene=MTMR14] [db\_xref=CCDS:CCDS43045.1]  
[protein=myotubularin-related protein 14 isoform 3] [protein\_id=NP\_071930.2] [location=80..1696]  
[gbkey=CDS]

ATGGCCGGCGCTCGGGCCGCCGCCGCTGCCTCGGCGGGGTCTCGGCCTCTTCAGGCAACCAGCCGC  
CTCAGGAGCTGGGGCTTGGGGAGCTGCTGGAGGAGTTCTCCCGGACTCAGTACCGGGCCAAGGATGGCAG  
CGGGACCGGCGGCTCTAAGGTTGAGCGCATTGAGAAGAGATGTCTGGAGCTGTTTGGCCGAGACTACTGT  
TTCAGCGTGATTCCAAACACGAATGGGGATATCTGTGGCCACTATCCCGGCACATCGTGTTCTGGAGT  
ATGAGAGTTCTGAGAAGGAGAAAGACACGTTTGAGAGTACCGTACAGGTGAGCAAGTTGCAAGACCTCAT  
CCACCGCAGCAAGATGGCCCGGTGCAGAGGACGTTTTGTCTGCCAGTAATCCTGTTCAAGGGCAAGCAC  
ATTTGCAGGTCGGCCACACTGGCTGGATGGGGAGAGCTGTATGGACGCTCAGGCTACAACCTATTTTTTCT  
CAGGGGGTGCAGATGATGCCTGGGCAGATGTGGAGGACGTACGGAGGAGGACTGTGCTCTTCGAAGTGG  
TGACACGCATCTTTTTGATAAGGTCAGAGGCTATGACATCAAGCTGCTTCGATACCTGTCAGTCAAATAC  
ATCTGTGACCTGATGGTGGAGAACAAGAAGGTGAAGTTTGGCATGAATGTAACCTCCTCTGAGAAGGTGG  
ACAAAGCCCAGCGCTATGCCGACTTCACTCTCCTCTCCATCCCGTATCCAGGCTGTGAATTTTTCAAGGA  
ATATAAAGATCGGGATTACATGGCAGAAGGGCTCATATTTAACTGGAAGCAGGACTACGTTGATGCCCCA

TTGAGCATCCCCGACTTCCTGACTCACTCTCTGAACATTGACTGGAGCCAGTATCAGTGTTGGGATCTGG  
TGCAACAAACACAAAACCTGAAGCTGCTGCTTTCCTTAGTTAACAGTGATGATGACAGCGGGCTGCT  
GGTACACTGTATCTCAGGCTGGGATCGGACCCCCCTCTTCATCTCCCTCCTGCGCCTTTCCTTGTTGGGCT  
GATGGGCTCATCCACACGTCCCTGAAGCCCACTGAGATCCTCTACCTCACTGTGGCCTATGACTGGTTCC  
TCTTCGGGCACATGTTGGTAGATCGGCTCAGCAAAGGGGAGGAGATTTTCTTCTTGCTTCAATTTTTT  
GAAGCATATTACCTCCGAGGAGTTCTCTGCTCTGAAGACCCAGAGGAGGAAGAGTTTGCCAGCCCCGGGAT  
GGAGGCTTCACCCTGGAAGACATCTGCATGCTGAGACGAAAGGACCGTGGCAGCACCACCAGCCTTGGCA  
GCGACTTCTCCCTGGTCATGGAGAGTTCCCCAGGAGCCACTGGGAGCTTCACCTATGAGGCCGTGGAGCT  
GGTCCCAGCAGGAGCGCCAACTCAGGCAGCTTGGCTTGCCAGCCCTGAGTGATCGAGAGACTCGGCTGCAG  
GAGGTGCGCTCAGCCTTCTTGGCTGCGTACAGCAGCACAGTGGGGCTTCGGGCAGTAGCCCCCAGTCCTT  
CCGGTGCCATCGGGGGCCTGCTGGAGCAATTTGCCCGTGGTGTTGGACTCCGGAGCATCAGCAGCAATGC  
CTTGTGA

>|cl|NM\_004958.4\_cds\_NP\_004949.1\_1 [gene=MTOR] [db\_xref=CCDS:CCDS127.1]  
[protein=serine/threonine-protein kinase mTOR isoform 1] [protein\_id=NP\_004949.1]  
[location=122..7771] [gbkey=CDS]

ATGCTTGGAACCGGACCTGCCGCCGCCACCACCGCTGCCACCACATCTAGCAATGTGAGCGTCTGCAGC  
AGTTTGCCAGTGGCCTAAAGAGCCGGAATGAGGAAACCAGGGCCAAAGCCGCCAAGGAGCTCCAGCACTA  
TGTCACCATGGAACCTCCGAGAGATGAGTCAAGAGGAGTCTACTCGTTCTATGACCAACTGAACCATCAC  
ATTTTTGAATTGGTTTCCAGCTCAGATGCCAATGAGAGGAAAGGTGGCATCTTGGCCATAGCTAGCCTCA  
TAGGAGTGGAAGGTGGGAATGCCACCCGAATTGGCAGATTTGCCAACTATCTTCGGAACCTCCTCCCCCTC  
CAATGACCCAGTTGTCATGGAAATGGCATCCAAGGCCATTGGCCGTCTTGCCATGGCAGGGGACACTTTT  
ACCGCTGAGTACGTGGAATTTGAGGTGAAGCGAGCCCTGGAATGGCTGGGTGCTGACCGCAATGAGGGCC

GGAGACATGCAGCTGTCCTGGTTCTCCGTGAGCTGGCCATCAGCGTCCCTACCTTCTTCTCCAGCAAGT  
GCAACCCTTCTTTGACAACATTTTTGTGGCCGTGTGGGACCCCAAACAGGCCATCCGTGAGGGAGCTGTA  
GCCGCCCTTCGTGCCTGTCTGATTCTCACAACCCAGCGTGAGCCGAAGGAGATGCAGAAGCCTCAGTGGT  
ACAGGCACACATTTGAAGAAGCAGAGAAGGGATTTGATGAGACCTTGGCCAAAGAGAAGGGCATGAATCG  
GGATGATCGGATCCATGGAGCCTTGTTGATCCTTAACGAGCTGGTCCGAATCAGCAGCATGGAGGGAGAG  
CGTCTGAGAGAAGAAATGGAAGAAATCACACAGCAGCAGCTGGTACACGACAAGTACTGCAAAGATCTCA  
TGGGCTTCGGAACAAAACCTCGTCACATTACCCCTTCACCAGTTTCCAGGCTGTACAGCCCCAGCAGTC  
AAATGCCTTGGTGGGGCTGCTGGGGTACAGCTCTCACCAAGGCCTCATGGGATTTGGGACCTCCCCCAGT  
CCAGCTAAGTCCACCCTGGTGGAGAGCCGGTGTTGCAGAGACTTGATGGAGGAGAAATTTGATCAGGTGT  
GCCAGTGGGTGCTGAAATGCAGGAATAGCAAGAACTCGCTGATCCAAATGACAATCCTTAATTTGTTGCC  
CCGCTTGGCTGCATTCCGACCTTCTGCCTTCACAGATACCCAGTATCTCCAAGATACCATGAACCATGTC  
CTAAGCTGTGTCAAGAAGGAGAAGGAACGTACAGCGGCCTTCCAAGCCCTGGGGCTACTTTCTGTGGCTG  
TGAGGTCTGAGTTTAAGGTCTATTTGCCTCGCGTGCTGGACATCATCCGAGCGGCCCTGCCCCAAAGGA  
CTTCGCCCATAGAGGCAGGAAGGCAATGCAGGTGGATGCCACAGTCTTCACTTGATCAGCATGCTGGCT  
CGAGCAATGGGGCCAGGCATCCAGCAGGATATCAAGGAGCTGCTGGAGCCCATGCTGGCAGTGGGACTAA  
GCCCTGCCCTCACTGCAGTGCTCTACGACCTGAGCCGTGAGATTCCACAGCTAAAGAAGGACATTCAAGA  
TGGGCTACTGAAAATGCTGTCCCTGGTCCTTATGCACAAACCCCTTCGCCACCCAGGCATGCCCAAGGGC  
CTGGCCCATCAGCTGGCCTCTCCTGGCCTCACGACCCTCCCTGAGGCCAGCGATGTGGGCAGCATCACTC  
TTGCCCTCCGAACGCTTGGCAGCTTTGAATTTGAAGGCCACTCTCTGACCCAATTTGTTGCCACTGTGC  
GGATCATTTCTGAACAGTGAGCACAAGGAGATCCGCATGGAGGCTGCCCCGACCTGCTCCCGCCTGCTC  
ACACCCTCCATCCACCTCATCAGTGCCATGCTCATGTGGTTAGCCAGACCGCAGTGCAAGTGGTGGCAG  
ATGTGCTTAGCAAACCTGCTCGTAGTTGGGATAACAGATCCTGACCCTGACATTCGCTACTGTGTCTTGGC  
GTCCCTGGACGAGCGCTTTGATGCACACCTGGCCCAGGCGGAGAACTTGCAAGCCTTGTTTGTGGCTCTG  
AATGACCAGGTGTTTGAGATCCGGGAGCTGGCCATCTGCACTGTGGGCCGACTCAGTAGCATGAACCCTG  
CCTTTGTCATGCCTTTCCTGCGCAAGATGCTCATCCAGATTTTGACAGAGTTGGAGCACAGTGGGATTGG

AAGAATCAAAGAGCAGAGTGCCCGCATGCTGGGGCACCTGGTCTCCAATGCCCCCGACTCATCCGCCCC  
TACATGGAGCCTATTCTGAAGGCATTAATTTTGAAGCTGAAAGATCCAGACCCTGATCCAAACCCAGGTG  
TGATCAATAATGTCCTGGCAACAATAGGAGAATTGGCACAGGTTAGTGGCCTGGAAATGAGGAAATGGGT  
TGATGAACTTTTTATTATCATCATGGACATGCTCCAGGATTCTCTTTGTTGGCCAAAAGGCAGGTGGCT  
CTGTGGACCCTGGGACAGTTGGTGGCCAGCACTGGCTATGTAGTAGAGCCCTACAGGAAGTACCCTACTT  
TGCTTGAGGTGCTACTGAATTTTCTGAAGACTGAGCAGAACCAGGGTACACGCAGAGAGGCCATCCGTGT  
GTTAGGGCTTTTAGGGGCTTTGGATCCTTACAAGCACAAAGTGAACATTGGCATGATAGACCAGTCCCGG  
GATGCCTCTGCTGTCAGCCTGTCAGAATCCAAGTCAAGTCAGGATTCTCTGACTATAGCACTAGTGAAA  
TGCTGGTCAACATGGGAACTTGCCTCTGGATGAGTTCTACCCAGCTGTGTCCATGGTGGCCCTGATGCG  
GATCTCCGAGACCAGTCACTCTCTCATCATCACACCATGGTTGTCCAGGCCATCACCTTCATCTTCAAG  
TCCCTGGGACTCAAATGTGTGCAGTTCCTGCCCCAGGTCATGCCACGTTCTTAACGTCATTGAGTCT  
GTGATGGGGCCATCCGGGAATTTTGTTCAGCAGCTGGGAATGTTGGTGTCTTTGTGAAGAGCCACAT  
CAGACCTTATATGGATGAAATAGTCACCCTCATGAGAGAATTCTGGGTCATGAACACCTCAATTCAGAGC  
ACGATCATTCTTCTATTGAGCAAATTGTGGTAGCTCTTGGGGGTGAATTTAAGCTCTACCTGCCCCAGC  
TGATCCCACACATGCTGCGTGTCTTCATGCATGACAACAGCCCAGGCCGCATTGTCTCTATCAAGTTACT  
GGCTGCAATCCAGCTGTTTGGCGCCAACCTGGATGACTACCTGCATTTACTGCTGCCTCCTATTGTTAAG  
TTGTTTGATGCCCCTGAAGCTCCACTGCCATCTCGAAAGGCAGCGCTAGAGACTGTGGACCGCTGACGG  
AGTCCCTGGATTTCACTGACTATGCCTCCCGGATCATTACCCTATTGTTGGAACACTGGACCAGAGCCC  
AGAAGTGCCTCCACAGCCATGGACACGCTGTCTTCACTTGTTTTTCAGCTGGGGAAGAAGTACCAAATT  
TTCATTCCAATGGTGAATAAAGTTCTGGTGCACACCGAATCAATCATCAGCGCTATGATGTGCTCATCT  
GCAGAATTGTCAAGGGATACACACTTGCTGATGAAGAGGAGGATCCTTTGATTACCAGCATCGGATGCT  
TAGGAGTGGCCAAGGGGATGCATTGGCTAGTGGACCACTGGAAACAGGACCCATGAAGAACTGCACGTC  
AGCACCATCAACCTCCAAAAGGCCTGGGGCGCTGCCAGGAGGGTCTCAAAGATGACTGGCTGGAATGGC  
TGAGACGGCTGAGCCTGGAGCTGCTGAAGGACTCATCATCGCCCTCCCTGCGCTCCTGCTGGGCCCTGGC  
ACAGGCCTACAACCCGATGGCCAGGGATCTCTTCAATGCTGCATTTGTGTCCTGCTGGTCTGAACTGAAT

GAAGATCAACAGGATGAGCTCATCAGAAGCATCGAGTTGGCCCTCACCTCACAAGACATCGCTGAAGTCA  
CACAGACCCTCTTAAACTTGGCTGAATTCATGGAACACAGTGACAAGGGCCCCCTGCCACTGAGAGATGA  
CAATGGCATTGTTCTGCTGGGTGAGAGAGCTGCCAAGTGCCGAGCATATGCCAAAGCACTACACTACAAA  
GAACTGGAGTTCAGAAAGGCCCCACCCCTGCCATTCTAGAATCTCTCATCAGCATTATAATAAGCTAC  
AGCAGCCGGAGGCAGCGGCCGGAGTGTTAGAATATGCCATGAAACACTTTGGAGAGCTGGAGATCCAGGC  
TACCTGGTATGAGAACTGCACGAGTGGGAGGATGCCCTTGTGGCCTATGACAAGAAAATGGACACCAAC  
AAGGACGACCCAGAGCTGATGCTGGGCCGATGCGCTGCCTCGAGGCCTGGGGGAATGGGGTCAACTCC  
ACCAGCAGTGCTGTGAAAAGTGGACCCTGGTTAATGATGAGACCCAAGCCAAGATGGCCCGGATGGCTGC  
TGCAGCTGCATGGGGTTTAGGTCAGTGGGACAGCATGGAAGAATACACCTGTATGATCCCTCGGGACACC  
CATGATGGGGCATTTTATAGAGCTGTGCTGGCACTGCATCAGGACCTCTTCTCCTTGGCACAACAGTGCA  
TTGACAAGGCCAGGGACCTGCTGGATGCTGAATTAAGTGGCAGGAGAGAGTTACAGTCGGGCATA  
TGGGGCCATGGTTTCTTGCCACATGCTGTCCGAGCTGGAGGAGGTTATCCAGTACAACTTGTCCCCGAG  
CGACGAGAGATCATCCGCCAGATCTGGTGGGAGAGACTGCAGGGCTGCCAGCGTATCGTAGAGGACTGGC  
AGAAAATCCTTATGGTGCGGTCCCTTGTGGTCAGCCCTCATGAAGACATGAGAACCTGGCTCAAGTATGC  
AAGCCTGTGCGGCAAGAGTGGCAGGCTGGCTCTTGCTCATAAAACCTTTAGTGTTGCTCCTGGGAGTTGAT  
CCGTCTCGGCAACTTGACCATCCTCTGCCAACAGTTCACCTCAGGTGACCTATGCCTACATGAAAAACA  
TGTGGAAGAGTGCCCGCAAGATCGATGCCTTCCAGCACATGCAGCATTTTGTCCAGACCATGCAGCAACA  
GGCCCAGCATGCCATCGCTACTGAGGACCAGCAGCATAAGCAGGAACTGCACAAGCTCATGGCCCCGATGC  
TTCCTGAAACTTGGAGAGTGGCAGCTGAATCTACAGGGCATCAATGAGAGCACAATCCCCAAAGTGCTGC  
AGTACTACAGCGCCGCCACAGAGCACGACCGCAGCTGGTACAAGGCCTGGCATGCGTGGGCAGTGATGAA  
CTTCGAAGCTGTGCTACACTACAAACATCAGAACCAAGCCCGCGATGAGAAGAAGAACTGCGTCATGCC  
AGCGGGGCCAACATCACCAACGCCACCACTGCCGCCACCACGGCCGCCACTGCCACCACCACTGCCAGCA  
CCGAGGGCAGCAACAGTGAGAGCGAGGCCGAGAGCACCGAGAACAGCCCCACCCATCGCCGCTGCAGAA  
GAAGGTCACTGAGGATCTGTCCAAAACCTCCTGATGTACACGGTGCCTGCCGTCCAGGGCTTCTCCGT  
TCCATCTCCTTGTACGAGGCAACAACCTCCAGGATACACTCAGAGTTCTCACCTTATGGTTTGATTATG

GTCACTGGCCAGATGTCAATGAGGCCTTAGTGGAGGGGGTGAAAGCCATCCAGATTGATACCTGGCTACA  
GGTTATACCTCAGCTCATTGCAAGAATTGATACGCCCAGACCCTTGGTGGGACGTCTCATTACCAGCTT  
CTCACAGACATTGGTCGGTACCACCCCCAGGCCCTCATCTACCCACTGACAGTGGCTTCTAAGTCTACCA  
CGACAGCCCGGCACAATGCAGCCAACAAGATTCTGAAGAACATGTGTGAGCACAGCAACACCCTGGTCCA  
GCAGGCCATGATGGTGAGCGAGGAGCTGATCCGAGTGGCCATCCTCTGGCATGAGATGTGGCATGAAGGC  
CTGGAAGAGGCATCTCGTTTGTACTTTGGGGAAAGGAACGTGAAAGGCATGTTTGAGGTGCTGGAGCCCT  
TGCATGCTATGATGGAACGGGGCCCCAGACTCTGAAGGAAACATCCTTTAATCAGGCCTATGGTCGAGA  
TTTAATGGAGGCCCAAGAGTGGTGCAGGAAGTACATGAAATCAGGGAATGTCAAGGACCTCACCCAAGCC  
TGGGACCTCTATTATCATGTGTTCCGACGAATCTCAAAGCAGCTGCCTCAGCTCACATCCTTAGAGCTGC  
AATATGTTTCCCCAAAATTCTGATGTGCCGGGACCTTGAATTGGCTGTGCCAGGAACATATGACCCCCAA  
CCAGCCAATCATTGCGATTCAGTCCATAGCACCGTCTTTGCAAGTCATCACATCCAAGCAGAGGCCCCGG  
AAATTGACACTTATGGGCAGCAACGGACATGAGTTTGTTTTCTTCTAAAAGGCCATGAAGATCTGCGCC  
AGGATGAGCGTGTGATGCAGCTCTTCGGCCTGGTTAACACCCTTCTGGCCAATGACCCAACATCTCTTCG  
GAAAAACCTCAGCATCCAGAGATACGCTGTCATCCCTTTATCGACCAACTCGGGCCTCATTGGCTGGGTT  
CCCCACTGTGACACACTGCACGCCCTCATCCGGGACTACAGGGAGAAGAAGAAGATCCTTCTCAACATCG  
AGCATCGCATCATGTTGCGGATGGCTCCGGACTATGACCACTTGACTCTGATGCAGAAGGTGGAGGTGTT  
TGAGCATGCCGTCAATAATACAGCTGGGGACGACCTGGCCAAGCTGCTGTGGCTGAAAAGCCCCAGCTCC  
GAGGTGTGGTTTGACCGAAGAACCAATTATACCCGTTCTTTAGCGGTCATGTCAATGGTTGGGTATATTT  
TAGGCCTGGGAGATAGACACCCATCCAACCTGATGCTGGACCGTCTGAGTGGGAAGATCCTGCACATTGA  
CTTTGGGGACTGCTTTGAGGTTGCTATGACCCGAGAGAAGTTTCCAGAGAAGATTCCATTTAGACTAACA  
AGAATGTTGACCAATGCTATGGAGGTTACAGGCCTGGATGGCAACTACAGAATCACATGCCACACAGTGA  
TGGAGGTGCTGCGAGAGCACAAGGACAGTGTGATGGCCGTGCTGGAAGCCTTTGTCTATGACCCCTTGCT  
GAACTGGAGGCTGATGGACACAAATACCAAAGGCAACAAGCGATCCCGAACGAGGACGGATTCCCTACTCT  
GCTGGCCAGTCAGTCGAAATTTTGACGGTGTGGAACCTTGGAGAGCCAGCCATAAGAAAACGGGGACCA  
CAGTGCCAGAATCTATTCATTCTTTATTGGAGACGGTTTGGTGAAACCAGAGGCCCTAAATAAGAAAGC

TATCCAGATTATTAACAGGGTTCGAGATAAGCTCACTGGTCGGGACTTCTCTCATGATGACACTTTGGAT  
GTTCCAACGCAAGTTGAGCTGCTCATCAAACAAGCGACATCCCATGAAAACCTCTGCCAGTGCTATATTG  
GCTGGTGCCCTTTCTGGTAA

>|cl|NM\_001354870.1\_cds\_NP\_001341799.1\_1 [gene=MYC] [db\_xref=CCDS:CCDS87627.1]  
[protein=myc proto-oncogene protein isoform 2] [protein\_id=NP\_001341799.1] [location=1161..2522]  
[gbkey=CDS]

CTGGATTTTTTTCGGGTAGTGAAAAACCAGCCTCCCGCGACGATGCCCCTCAACGTTAGCTTCACCAACA  
GGA ACTATGACCTCGACTACGACTCGGTGCAGCCG TATTTCTACTGCGACGAGGAGGAGAACTTCTACCA  
GCAGCAGCAGCAGAGCGAGCTGCAGCCCCGGCGCCAGCGAGGATATCTGGAAGAAATTCGAGCTGCTG  
CCCACCCCGCCCCTGTCCCCTAGCCGCCGCTCCGGGCTCTGCTCGCCCTCTACGTTGCGGTACACCCCT  
TCTCCCTTCGGGGAGACAACGACGGCGGTGGCGGGAGCTTCTCCACGGCCGACCAGCTGGAGATGGTGAC  
CGAGCTGCTGGGAGGAGACATGGTGAACCAGAGTTTCATCTGCGACCCGGACGACGAGACCTTCATCAAA  
AACATCATCATCCAGGACTGTATGTGGAGCGGCTTCTCGGCCGCCGCAAGCTCGTCTCAGAGAAGCTGG  
CCTCCTACCAGGCTGCGCGCAAAGACAGCGGCAGCCCGAACCCCGCCGCGGCCACAGCGTCTGCTCCAC  
CTCCAGCTTG TACCTGCAGGATCTGAGCGCCGCCGCTCAGAGTGCATCGACCCCTCGGTGGTCTTCCCC  
TACCCTCTCAACGACAGCAGCTCGCCCAAGTCCTGCGCCTCGCAAGACTCCAGCGCCTTCTCTCCGTCT  
CGGATTCTCTGCTCTCTCGACGGAGTCCTCCCCGCAGGGCAGCCCCGAGCCCCTGGTGCTCCATGAGGA  
GACACCGCCCACCACCAGCAGCGACTCTGAGGAGGAACAAGAAGATGAGGAAGAAATCGATGTTGTTTCT  
GTGGAAAAGAGGCAGGCTCCTGGCAAAGGTCAGAGTCTGGATCACCTTCTGCTGGAGGCCACAGCAAAC  
CTCCTCACAGCCCACTGGTCCTCAAGAGGTGCCACGTCTCCACACATCAGCACA ACTACGCAGCGCCTCC  
CTCCACTCGGAAGGACTATCCTGCTGCCAAGAGGGTCAAGTTGGACAGTGT CAGAGTCCTGAGACAGATC  
AGCAACAACCGAAAATGCACCAGCCCCAGGTCTCGGACACCGAGGAGAATGTCAAGAGGCGAACACACA

ACGTCTTGGAGCGCCAGAGGAGGAACGAGCTAAACGGAGCTTTTTTGGCCTGCGTGACCAGATCCCGGA  
GTTGGAAAACAATGAAAAGGCCCCCAAGGTAGTTATCCTTAAAAAAGCCACAGCATACATCCTGTCCGTC  
CAAGCAGAGGAGCAAAAGCTCATTCTGAAGAGGACTTGTTGCGGAAACGACGAGAACAGTTGAAACACA  
AACTGAACAGCTACGGAACTCTTGTGCGTAA

>|cl|NM\_138386.3\_cds\_NP\_612395.2\_1 [gene=NAF1] [db\_xref=CCDS:CCDS3803.1] [protein=H/ACA  
ribonucleoprotein complex non-core subunit NAF1 isoform a] [protein\_id=NP\_612395.2]  
[location=164..1648] [gbkey=CDS]

ATGGAGGTAGTGGAGGCCGCCGCTCAGCTGGAACTCTGAAATTCAATGGCACCGACTTTGGAGTTG  
GGGAAGGTCCGGCGGCTCCGTCTCCGGGCTCTGCCCTGTGCCAGGGACACAGCCGCCGCTACAGTCGTT  
TGAGGGGTCCCCGGACGCTGGGCAGACCGTGGAGGTTAAGCCTGCCGGGGAGCAGCCTCTGCAGCCCGTT  
CTGAACGCCGTCGCGGCCGGGACCCCGCGCCGAGCCACAGCCACCGGCTGAATCGCCGGCCTGCGGAG  
ACTGCGTCACCTCCCCAGGAGCCGCAGAGCCTGCGCGGGCGCCGGACTCCTTGGAGACCTCGGACTCGGA  
TTCGGACTCGGACAGTGAAACAGATTCAGATAGTTCAAGTTCATCGTCTTCCTCTTCATCTTCCTCATCG  
TCGTCTTCTTCCTTGTATATCACTTCCTCCAGTGCTGTGAGATGGAGATGATGATTACAAATTGAGA  
AGGAAAATAAGAATTTTCTCTTAAAACAAAAGATGAATTACTTCTTAATGAACTGCCTTCTGTTGAAGA  
ACTCACTATTATTCTGCCTGAAGATATTGAGTTAAAGCCTCTTGGGATGGTTTCAAGTATTATTGAACAA  
CTAGTAATAATTGAATCTATGACTAACCTACCTCCAGTTAATGAGGAGACTGTAATTTTTAAAAGTGATC  
GACAAGCAGCAGGAAAGATATTCGAGATATTTGGACCTGTTGCACATCCATTTTATGTGTTACGGTTTAA  
TTCTTCAGATCACATTGAGAGTAAAGGTATTAATAAAGGAGACTATGTATTTTGCTCCATCAATGAAA  
GATTTCACTCAATATATATTCACAGAAAACTAAAACAGGATAAGGGATCAGATGCATCATGGAAGAATG  
ATCAGGAACCACCAGAGGCCTTAGATTTTAGTGATGATGAAAAAGAGAAGGAAGCCAAACAGAGGAA  
AAAATCTCAGATTCAAGGCCGGAATAAACTCAAATCTGAATTTAATGAGCCTGGTGAAGATTTTACTGAA

GTACATCAGAATTGGAATGCTCATAGCTCTGCTTCAGAGCATGCAAAAGGATATCGTAACAGAGAATTCA  
CACGAGGATTTTCCAGGGCCAGATACCCTCGATCTTGCCATGGCAGGCCTCCACCTCAGCATTCTATAA  
CTCAGAACATATGGTATCTCAGGAGACTTCAGGATTCCTTCTCAGAGACAAAATAATCCCATTATGCCA  
CAATACCCCTTCTCTTCCAGTGTTTGACATGCATAATTTTCCCCTCCGCCCTCCACCCCCACCACCAC  
CCCCACCTGTAAACATGGGTTGGGCTACACCAAACATGGCTGCTCATCCATTACTTAACTTACCATACTC  
CCTACCCCCACCCCTCCCCCTCCACCACTGCCTCCTCCACCCTCTTCTGGAGATAGTAATTCTCATTTT  
GGACCTTACTATTAG

>|cl|NM\_005746.3\_cds\_NP\_005737.1\_1 [gene=NAMPT] [db\_xref=CCDS:CCDS5737.1]  
[protein=nicotinamide phosphoribosyltransferase precursor] [protein\_id=NP\_005737.1]  
[location=100..1575] [gbkey=CDS]

ATGAATCCTGCGGCAGAAGCCGAGTTCAACATCCTCCTGGCCACCGACTCCTACAAGGTTACTCACTATA  
AACAATATCCACCCAACACAAGCAAAGTTTATTCTACTTTGAATGCCGTGAAAAGAAGACAGAAAACCTC  
CAAATTAAGGAAGGTGAAATATGAGGAAACAGTATTTTATGGGTTGCAGTACATTCTTAATAAGTACTTA  
AAAGGTAAAGTAGTAACCAAAGAGAAAATCCAGGAAGCCAAAGATGTCTACAAAGAACATTTCCAAGATG  
ATGTCTTTAATGAAAAGGGATGGAACACATTCTTGAGAAGTATGATGGGCATCTTCCAATAGAAATAAA  
AGCTGTTCTGAGGGCTTTGTCATTCCCAGAGGAAATGTTCTCTTCACGGTGAAAAACACAGATCCAGAG  
TGTTACTGGCTTACAAATTGGATTGAGACTATTCTTGTTGAGTCTGGTATCCAATCACAGTGGCCACAA  
ATTCTAGAGAGCAGAAGAAAATATTGGCCAAATATTTGTTAGAACTTCTGGTAACTTAGATGGTCTGGA  
ATACAAGTTACATGATTTTGGCTACAGAGGAGTCTCTCCCAAGAGACTGCTGGCATAGGAGCATCTGCT  
CACTTGGTTAACTTCAAAGGAACAGATACAGTAGCAGGACTTGCTCTAATTAATAAATATTATGGAACGA  
AAGATCCTGTTCCAGGCTATTCTGTTCCAGCAGCAGAACACAGTACCATAACAGCTTGGGGGAAAGACCA  
TGAAAAAGATGCTTTTGAACATATTGTAACACAGTTTTTCATCAGTGCCTGTATCTGTGGTCAGCGATAGC

TATGACATTTATAATGCGTGTGAGAAAATATGGGGTGAAGATCTAAGACATTTAATAGTATCAAGAAGTA  
CACAGGCACCACTAATAATCAGACCTGATTCTGGAAACCCTCTTGACACTGTGTTAAAGGTTTTGGAGAT  
TTTAGGTAAGAAGTTTCCTGTTACTGAGAACTCAAAGGGTTACAAGTTGCTGCCACCTTATCTTAGAGTT  
ATTCAAGGGGATGGAGTAGATATTAATACCTTACAAGAGATTGTAGAAGGCATGAAACAAAAAATGTGGA  
GTATTGAAAATATTGCCTTCGGTTCTGGTGGAGGTTTGCTACAGAAGTTGACAAGAGATCTCTTGAATTG  
TTCCTTCAAGTGTAGCTATGTTGTAATAATGGCCTTGGGATTAACGTCTTCAAGGACCCAGTTGCTGAT  
CCCAACAAAAGGTCCAAAAGGGCCGATTATCTTTACATAGGACGCCAGCAGGGAATTTTGTTACACTGG  
AGGAAGGAAAAGGAGACCTTGAGGAATATGGTCAGGATCTTCTCCATACTGTCTTCAAGAATGGCAAGGT  
GACAAAAGCTATTCATTTGATGAAATAAGAAAAAATGCACAGCTGAATATTGAACTGGAAGCAGCACAT  
CATTAG

>|cl|NM\_005899.5\_cds\_NP\_005890.2\_1 [gene=NBR1] [db\_xref=CCDS:CCDS45694.1] [protein=next to  
BRCA1 gene 1 protein isoform a] [protein\_id=NP\_005890.2] [location=99..2999] [gbkey=CDS]

ATGGAACCACAGGTTACTCTAAATGTGACTTTTAAAAATGAAATTCAAAGCTTTCTGTTTTCTGATCCAG  
AAAATACAACCTGGGCTGATATCGAAGCTATGGTAAAAGTTTCATTTGATCTGAATACTATTCAAATAAA  
ATACCTGGATGAGGAAAATGAAGAGGTATCCATCAACAGTCAAGGAGAATATGAAGAAGCGCTTAAGATG  
GCAGTTAAACAGGGAAACCAACTGCAGATGCAAGTCCACGAAGGGCACCATGTCGTTGATGAAGCCCCAC  
CCCCAGTTGTAGGAGCAAAACGACTAGCTGCCAGGGCAGGGAAGAAGCCACTTGACATTACTCTTCACT  
GGTGAGAGTCTTGGGATCAGACATGAAGACCCCAGAGGATCCTGCAGTGCAGTCGTTTCCACTTGTTCCA  
TGTGACACAGACCAGCCTCAAGACAAGCCCCCAGACTGGTTCACAAGCTACCTGGAGACGTTTCAGAGAAC  
AAGTGGTTAACGAAACGGTTGAGAAGCTTGAACAGAAATTACATGAAAAGCTTGTCTCCAGAACCCATC  
CTTGGGTTCTTGTCCCTCAGAAGTCTCAATGCCTACTTCAGAAGAAACATTGTTTTTGCCAGAAAACCAG  
TTCAGCTGGCATATTGCTTGCAACAACGCCAAAGAAGGATTGTTGGTGTCCGCTACCAAGTGTAGCCTAT

GCCCATCCTACAATATCTGTGAAGATTGTGAAGCAGGGCCATATGGCCATGACACTAACCACGTCTCTGCT  
GAAGTTGCGGAGACCTGTTGTGGGCTCCTCTGAACCGTTCTGTCACTCAAAGTACTCTACTCCTCGTCTT  
CCTGCTGCTCTGGAACAAGTCAGGCTCCAGAAACAGGTTGATAAGAAGTTTCTTAAAGCAGAAAAGCAAA  
GGTTGCGAGCTGAGAAGAAACAACGTAAAGCAGAGGTCAAGGAACTTAAAAAGCAGCTTAACTCCATAG  
GAAAATTCACCTGTGGAATTCAATCCATGGACTCCAGAGCCCCAAGTCTCCTTTAGGCCGACCTGAGAGC  
TTGCTCCAGTCTAATACCCTGATGCTCCCTTTGCAGCCCTGTACCTCCGTTATGCCAATGCTCAGTGCAG  
CATTTGTGGATGAGAATTTGCCTGATGGGACTCACCTTCAGCCAGGAACCAAGTTTATCAAACACTGGAG  
GATGAAAAATACAGGAAATGTAAAGTGGAGTGCAGACACAAAGCTCAAGTTCATGTGGGGAAACCTGACT  
TTGGCTCCACAGAAAAGAAGGATGTTTTGGTTCCCTGCCTCAAGGCCGGCCATGTGGGAGTTGTATCTG  
TGGAGTTCATTGCCCCAGCCTTGAGAGGAACGTATACTTCCCATTGGCGTCTTTCTCACAAAGGCCAGCA  
ATTTGGGCCTCGGGTCTGGTGCAGTATCATAGTAGATCCTTTCCCCTCCGAAGAGAGCCCTGATAACATT  
GAAAAGGGCATGATCAGCTCAAGCAAACTGATGATCTCACCTGCCAGCAAGAGGAACTTTTCTTCTGG  
CTAAAGAAGAAAGACAGCTTGGTGAAGTGAAGTGCAGCAGACAGAAGGGACAGCAGCCTGCATCCCACAGAA  
GGCAAAAAATGTTGCCAGTGAGAGGGAGCTCTACATCCCATCTGTGGATCTTCTGACTGCCCAGGACCTG  
CTGTCCTTTGAGCTGTTGGATATAAACATTGTTCAAGAGTTGGAGAGAGTGCCCCACAACACCCCTGTGG  
ATGTGACTCCCTGCATGTCTCCTCTGCCACATGACAGTCCTTTAATAGAGAAGCCAGGCTTGGGGCAGAT  
AGAGGAAGAGAATGAAGGGGCAGGATTTAAAGCACTTCTGATTCTATGGTGTGAGTAAAGAGGAAGGCT  
GAGAACATTGCTTCTGTGGAGGAAGCAGAAGAAGACCTGAGTGGGACCCAGTTTGTGTGTGAGACAGTAA  
TCCGATCCCTTACCTTGGATGCTGCCCCAGACCACAACCCCTCCTTGACAGACAGAAGTCCTTGACAGATGAC  
ATTTGCCTTGCTGAAGGACCACTTGGAATGAGAAGGAGGAGATTATCCATATCGCTGAGGAAGAAGCT  
GTCATGGAGGAGGAGGAGGATGAGGAGGATGAGGAGGAGGAGGATGAGCTCAAAGATGAAGTTCAAAGTC  
AGTCCTCTGCTTCTCAGAGGATTACATCATCATCCTGCCTGAGTGCTTTGATACCAGCCGCCCCCTGGG  
GGATTCTATGTACAGCTCTGCGCTCTCACAGCCAGGCCTGGAGCGAGGTGCTGAAGGCAAGCCTGGGGTT  
GAGGCTGGGCAGGAACCAGCTGAGGCTGGGGAAAGACTCCCTGGAGGGGAGAACCAGCCACAGGAGCACA  
GCATAAGTGACATCCTCACGACCTCACAGACTCTGGAAACAGTGCCCCTAATCCCAGAGGTAGTGGAGCT

TCCACCGTCACTGCCCAGGAGCTCTCCTTGTGTACATCATCATGGTTCCCCAGGAGTGGATTTACCAGTT  
ACCATACCAGAAGTTTCTTCAGTCCCTGATCAGATCAGAGGAGAGCCCAGAGGCTCATCAGGACTTGTA  
ACAGCAGACAGAAGAGCTATGACCACTCAAGGCACCATCATGGGAGCAGCATTGCTGGAGGACTGGTGAA  
GGGGGCTTTGTCTGTTGCTGCCTCTGCATACAAGGCCCTGTTTGCTGGGCCACCAGTCACTGCACAGCCA  
ATAATTTCTGAAGATCAGACAGCAGCCCTGATGGCCCATCTCTTTGAAATGGGATTCTGTGACAGGCAGC  
TGAACCTACGGCTGCTGAAGAAACACAATTACAATATCCTGCAGGTTGTGACAGAACTTCTTCAGTTAA  
CAACAACGACTGGTACAGCCAACGCTATTGA

>|cl|NM\_205842.3\_cds\_NP\_995314.1\_1 [gene=NCKAP1] [db\_xref=CCDS:CCDS2288.1] [protein=nck-  
associated protein 1 isoform 2] [protein\_id=NP\_995314.1] [location=359..3763] [gbkey=CDS]

ATGTCGCGCTCAGTGCTGCAGCCCAGTCAGCAGAAGCTGGCGGAGAAGCTCACCATCCTCAACGACCGGG  
GCGTCGGCATGCTCACCCGCCTCTACAACATCAAGAAGCAAGGACAAGTTTGGAAGGCATGTGGAGACCC  
CAAGGCAAAACCATCCTATCTTATCGACAAAAACCTGGAATCTGCTGTGAAATTCATAGTCAGAAAATTC  
CCTGCTGTAGAAACCCGCAACAACAATCAACAGCTTGCACAACTACAGAAAGAAAAATCAGAGATTCTGA  
AAAATCTGGCATTATATTACTTCACATTTGTAGATGTTATGGAATTTAAGGACCATGTTTGTGAATTGCT  
GAATACTATTGACGTTTGCCAAGTCTTCTTTGATATTACTGTAACTTTGATTTAACAAGAACTACTTA  
GATTTAATTATAACCTATACAACACTAATGATACTGCTGTCTCGAATTGAAGAAAGGAAGGCAATCATTG  
GATTATACAACCTATGCCCATGAAATGACTCATGGAGCAAGTGACAGAGAATACCCACGCCTTGCCAGAT  
GATTGTGGATTATGAAAACCCTTTAAAGAAGATGATGGAAGAATTTGTACCCCATAGCAAGTCTCTTTCA  
GATGCACTAATTTCTCTTCAAATGGTATATCCTCGAAGGAATCTTTCAGCTGACCAGTGGAGAAATGCCC  
AGTTATTGAGCCTCATCAGTGCACCTAGTACAATGCTTAATCCAGCACAGTCCGACACTATGCCTTGTGA  
ATACCTCTCTTTGGATGCAATGGAAAAGTGGATTATCTTTGGCTTTATTTTGTGCCATGGGATCCTAAAT  
ACTGACGCTACAGCACTGAACCTTTGGAACTAGCTCTTCAAAGTAGCTCTTGCCCTCTCTCTTTCGGG

ATGAAGTTTTCCACATTCACAAAGCTGCAGAAGACTTATTTGTAAACATACGAGGCTATAATAAACGTAT  
TAATGACATAAGAGAATGCAAGGAGGCAGCCGTGTCACATGCTGGTTCATGCACAGAGAAAGACGCAAG  
TTTTTAAGATCTGCACTGAAGGAATTGGCTACTGTCCTCTCTGATCAACCTGGATTGCTAGGTCCCAAGG  
CACTTTTTGTTTTATGGCATTATCCTTTGCCCGTGATGAAATCATCTGGCTACTTCGTCATGCAGATAA  
CATGCCAAAGAAGAGTGCAGACGACTTTATAGATAAGCACATTGCTGAATTAATATTTTACATGGAAGAA  
CTTAGAGCACATGTGAGGAAATACGGACCTGTAATGCAGAGGTATTACGTGCAGTACCTTTCTGGCTTTG  
ATGCTGTTGTCCTCAATGAACTCGTGCAGAATCTTTCTGTTTGCCCTGAAGATGAATCAATCATCATGTC  
CTCTTTTGTTAACACTATGACTTCCCTAAGTGTAACAAGTTGAAGATGGGGAAGTATTTGATTTCAGA  
GGAATGAGATTAGATTGGTTTAGGTTACAGGCATATACTAGTGTCTCAAAGGCTTCACTTGGCCTTGCAG  
ATCACAGAGAACTTGGAAGATGATGAATACAATAATTTTTCATACAAAAATGGTAGATTCTTGGTGGA  
AATGTTGGTGGAACATCAGATCTCTCCATATTTGTTTTATAGTCGTGCTTTGAGAAGATGTTTCAA  
CAGTGTTTGGAGTTACCCTCTCAATCAAGATACTCAATTGCATTTCCACTACTTTGCACTCATTTTATGA  
GTTGCACGCATGAACTATGTCCAGAAGAGCGACATCATATTGGAGATCGCAGTCTTTCCTTATGTAATAT  
GTTCTAGATGAAATGGCCAAACAAGCTCGAAATCTCATCACTGATATTTGCACAGAACAGTGTACCCTT  
AGTGACCAGTTGCTACCCAAGCATTGTGCCAAACTATCAGTCAAGCAGTGAATAAGAAATCAAAAAAGC  
AGACTGGTAAGAAAGGGGAACCTGAAAGGGAGAAACCAGGTGTTGAGAGCATGAGGAAAAACAGGCTGGT  
TGTGACCAACCTTGATAAATTGCACACTGCACTTTCTGAGTTATGCTTCTCTATAAATTATGTACCAAAC  
ATGGTGGTATGGGAACATACCTTTACCCACGAGAATATTTGACTTCTCATCTGGAAATACGCTTTACCA  
AGTCAATTGTTGGGATGACTATGTATAATCAAGCCACACAGGAAATTGCAAAACCTTCAGAACTTCTAAC  
AAGTGTAAGAGCATACATGACCGTACTCCAGTCAATAGAAAATATGTGCAGATTGATATTACAAGAGTA  
TTTAATAATGTGCTTCTTCAACAAACACAACATTTAGACAGTCATGGAGAGCCAACCATTACAAGTCTAT  
ACACAAATTGGTATTTGGAACTTTGTTACGACAAGTCAGCAATGGCCATATAGCATATTTCTGCAAT  
GAAAGCGTTTGTGAACTTACCTACAGAAAATGAATTAACATTCAATGCAGAGGAATATTCTGACATATCA  
GAAATGAGGTCATTATCAGAACTACTAGGCCCATATGGTATGAAGTTTCTAAGTGAAAGCCTTATGTGGC  
ATATTTTCATCACAAGTTGCTGAACTTAAGAACTTGTGGTGGAGAATGTTGATGTGTTAACACAAATGAG

GACCAGCTTTGACAAACCAGACCAGATGGCTGCACTGTTTAAAAGATTATCATCTGTTGACAGTGTCTTG  
AAGAGGATGACAATAATTGGTGTAAATTTATCCTTCCGATCATTGGCACAAGAAGCACTTAGAGATGTCT  
TATCCTACCACATTCTTTTCTTGTAAGTTCAATTGAAGATTTTAAGGATCACATTCCAAGGGAAACTGA  
TATGAAGGTTGCAATGAATGTGTATGAGTTATCATCAGCTGCCGGATTACCTTGAGATTGATCCTGCA  
TTGGTCGTAGCTCTTTCTTCACAAAAATCGGAAAACATTAGTCCAGAAGAAGAGTATAAAATTGCCTGCC  
TTCTCATGGTGTTTGTGGCAGTTTCTTTGCCAACACTGGCCAGTAATGTGATGTCTCAGTACAGCCCTGC  
TATAGAAGGGCATTGCAACAACATACATTGCTTGGCCAAAGCCATCAACCAGATTGCTGCAGCTTTGTTT  
ACAATTCACAAAGGAAGCATTGAAGACCGTCTTAAAGAATTTCTGGCGCTTGCATCCTCCAGTCTACTGA  
AAATTGGCCAGGAGACAGATAAAACTACAACAAGAAATAGAGAATCTGTTTATTTACTGCTAGATATGAT  
TGTACAAGAATCTCCATTCCTTACAATGGATCTTTTGGAATCTTGTTTTCTTATGTCTTGCTGAGAAAT  
GCATACCATGCTGTCTACAAACAAAGTGTTACATCTTCTGCATAA

>|cl|NM\_006164.5\_cds\_NP\_006155.2\_1 [gene=NFE2L2] [db\_xref=CCDS:CCDS42782.1] [protein=nuclear  
factor erythroid 2-related factor 2 isoform 1] [protein\_id=NP\_006155.2] [location=152..1969]  
[gbkey=CDS]

ATGATGGACTTGGAGCTGCCGCCGCCGGGACTCCCGTCCCAGCAGGACATGGATTTGATTGACATACTTT  
GGAGGCAAGATATAGATCTTGGAGTAAGTCGAGAAGTATTTGACTTCAGTCAGCGACGGAAAGAGTATGA  
GCTGGAAAAACAGAAAAAACTTGAAAAGGAAAGACAAGAACAACCTCCAAAAGGAGCAAGAGAAAGCCTTT  
TTCGCTCAGTTACAACTAGATGAAGAGACAGGTGAATTTCTCCCAATTCAGCCAGCCCAGCACATCCAGT  
CAGAAACCAGTGGATCTGCCAACTACTCCCAGGTTGCCACATTCCCAAATCAGATGCTTTGTACTTTGA  
TGACTGCATGCAGCTTTTGGCGCAGACATTCCCGTTTGTAGATGACAATGAGGTTTCTTCGGCTACGTTT  
CAGTCACTTGTTCTGATATTCCCGGTCACATCGAGAGCCCAGTCTTCATTGCTACTAATCAGGCTCAGT  
CACCTGAAACTTCTGTTGCTCAGGTAGCCCCTGTTGATTTAGACGGTATGCAACAGGACATTGAGCAAGT

TTGGGAGGAGCTATTATCCATTCCTGAGTTACAGTGTCTTAATATTGAAAATGACAAGCTGGTTGAGACT  
ACCATGGTTCCAAGTCCAGAAGCCAACTGACAGAAGTTGACAATTATCATTTTTACTCATCTATACCCT  
CAATGGAAAAAGAAGTAGGTAAGTGTAGTCCACATTTTCTTAATGCTTTTGAGGATTCCTTCAGCAGCAT  
CCTCTCCACAGAAGACCCCAACCAGTTGACAGTGAACCTATTAAATTCAGATGCCACAGTCAACACAGAT  
TTTGGTGATGAATTTTATTCTGCTTTCATAGCTGAGCCCAGTATCAGCAACAGCATGCCCTCACCTGCTA  
CTTTAAGCCATTCACTCTCTGAACTTCTAAATGGGCCCATTTGATGTTTCTGATCTATCACTTTGCAAAGC  
TTTCAACCAAAACCCCTGAAAGCACAGCAGAATTCAATGATTCTGACTCCGGCATTTCATAAACACA  
AGTCCCAGTGTGGCATCACCAGAACACTCAGTGGAATCTTCAGCTATGGAGACACACTACTTGGCCTCA  
GTGATTCTGAAGTGGAAGAGCTAGATAGTGCCCTGGAAGTGTCAAACAGAATGGTCCTAAAACACCAGT  
ACATTCTTCTGGGGATATGGTACAACCCTTGTCACCATCTCAGGGGCAGAGCACTCACGTGCATGATGCC  
CAATGTGAGAACACACCAGAGAAAGAATTGCCTGTAAGTCCTGGTCATCGGAAAACCCATTACAAAAAG  
ACAAACATTCAAGCCGCTTGGAGGCTCATCTCACAAGAGATGAACTTAGGGCAAAAGCTCTCCATATCCC  
ATTCCCTGTAGAAAAAATCATTAACCTCCCTGTTGTTGACTTCAACGAAATGATGTCCAAAGAGCAGTTC  
AATGAAGCTCAACTTGCATTAATTCGGGATATACGTAGGAGGGGTAAGAATAAAGTGGCTGCTCAGAATT  
GCAGAAAAAGAAAAGTGGAAAATATAGTAGAACTAGAGCAAGATTTAGATCATTTGAAAGATGAAAAAGA  
AAAATTGCTCAAAGAAAAAGGAGAAAATGACAAAAGCCTTCACCTACTGAAAAACAACCTCAGCACCTTA  
TATCTCGAAGTTTTTCAGCATGCTACGTGATGAAGATGGAAAACCTTATTCTCCTAGTGAATACTCCCTGC  
AGCAAACAAGAGATGGCAATGTTTTCTTGTCCCAAAAGTAAGAAGCCAGATGTTAAGAAAAACTAG

>|cl|NM\_003998.4\_cds\_NP\_003989.2\_1 [gene=NFKB1] [db\_xref=CCDS:CCDS3657.1] [protein=nuclear  
factor NF-kappa-B p105 subunit isoform 1] [protein\_id=NP\_003989.2] [location=438..3347] [gbkey=CDS]

ATGGCAGAAGATGATCCATATTTGGGAAGGCCTGAACAAATGTTTCATTTGGATCCTTCTTTGACTCATA  
CAATATTTAATCCAGAAGTATTTCAACCACAGATGGCACTGCCAACAGCAGATGGCCCATACCTTCAAAT

ATTAGAGCAACCTAAACAGAGAGGATTTTCGTTTCCGTTATGTATGTGAAGGCCCATCCCATGGTGGACTA  
CCTGGTGCCTCTAGTGAAAAGAACAAGAAGTCTTACCCTCAGGTCAAAATCTGCAACTATGTGGGACCAG  
CAAAGGTTATTGTTTCAGTTGGTCACAAATGGAAAAAATATCCACCTGCATGCCCACAGCCTGGTGGGAAA  
ACACTGTGAGGATGGGATCTGCACTGTAAGTCTGGACCCAAGGACATGGTGGTCGGCTTCGCAAACCTG  
GGTATACTTCATGTGACAAAGAAAAAAGTATTTGAAACACTGGAAGCACGAATGACAGAGGCGTGTATAA  
GGGGCTATAATCCTGGACTCTTGGTGCACCCTGACCTTGCCTATTTGCAAGCAGAAGGTGGAGGGGACCG  
GCAGCTGGGAGATCGGGAAAAAGAGCTAATCCGCCAAGCAGCTCTGCAGCAGACCAAGGAGATGGACCTC  
AGCGTGGTGC GGCTCATGTTTACAGCTTTTCTTCCGGATAGCACTGGCAGCTTCACAAGGCGCCTGGAAC  
CCGTGGTATCAGACGCCATCTATGACAGTAAAGCCCCCAATGCATCCAACCTGAAAATTGTAAGAATGGA  
CAGGACAGCTGGATGTGTGACTGGAGGGGAGGAAATTTATCTTCTTTGTGACAAAGTTCAGAAAGATGAC  
ATCCAGATTCGATTTTATGAAGAGGAAGAAAATGGTGGAGTCTGGGAAGGATTTGGAGATTTTCCCCCA  
CAGATGTTTCATAGACAATTTGCCATTGTCTTCAAACTCCAAAGTATAAAGATATTAATATTACAAAACC  
AGCCTCTGTGTTTGTCCAGCTTCGGAGGAAATCTGACTTGGAAGTCTAGTGAACCAAAACCTTTCCTCTAC  
TATCCTGAAATCAAAGATAAAGAAGAAGTGCAGAGGAAACGTCAGAAGCTCATGCCCAATTTTTCGGATA  
GTTTCGGCGGTGGTAGTGGTGTCTGGAGCTGGAGGCGGAGGCATGTTTGGTAGTGGCGGTGGAGGAGGGGG  
CACTGGAAGTACAGGTCCAGGGTATAGCTTCCCACACTATGGATTTCTACTTATGGTGGGATTACTTTC  
CATCCTGGAAGTACTAAATCTAATGCTGGGATGAAGCATGGAACCATGGACACTGAATCTAAAAAGGACC  
CTGAAGGTTGTGACAAAAGTGATGACAAAAACACTGTAAACCTCTTTGGGAAAGTTATTGAAACCACAGA  
GCAAGATCAGGAGCCCAGCGAGGCCACCGTTGGGAATGGTGAGGTCACTCTAACGTATGCAACAGGAACA  
AAAGAAGAGAGTGCTGGAGTTCAGGATAACCTCTTCTAGAGAAGGCTATGCAGCTTGCAAAGAGGCATG  
CCAATGCCCTTTTCGACTACGCGGTGACAGGAGACGTGAAGATGCTGCTGGCCGTCCAGCGCCATCTCAC  
TGCTGTGCAGGATGAGAATGGGGACAGTGTCTTACACTTAGCAATCATCCACCTTCATTCTCAACTGTG  
AGGGATCTACTAGAAGTCACATCTGGTTTGATTCTGATGACATTATCAACATGAGAAATGATCTGTACC  
AGACGCCCTTGCACTTGGCAGTGATCACTAAGCAGGAAGATGTGGTGGAGGATTTGCTGAGGGCTGGGGC  
CGACCTGAGCCTTCTGGACCGCTTGGGTAAGTCTGTTTTGCACCTAGCTGCCAAAGAAGGACATGATAAA

GTTCTCAGTATCTTACTCAAGCACAAAAAGGCAGCACTACTTCTTGACCACCCCAACGGGGACGGTCTGA  
ATGCCATTCATCTAGCCATGATGAGCAATAGCCTGCCATGTTTGCTGCTGCTGGTGGCCGCTGGGGCTGA  
CGTCAATGCTCAGGAGCAGAAGTCCGGGCGCACAGCACTGCACCTGGCTGTGGAGCACGACAACATCTCA  
TTGGCAGGCTGCCTGCTCCTGGAGGGTGATGCCCATGTGGACAGTACTACCTACGATGGAACCACACCCC  
TGCATATAGCAGCTGGGAGAGGGTCCACCAGGCTGGCAGCTCTTCTCAAAGCAGCAGGAGCAGATCCCCT  
GGTGGAGAACTTTGAGCCTCTCTATGACCTGGATGACTCTTGGGAAAATGCAGGAGAGGATGAAGGAGTT  
GTGCCTGGAACCACGCCTCTAGATATGGCCACCAGCTGGCAGGTATTTGACATATTAAATGGGAAACCAT  
ATGAGCCAGAGTTTACATCTGATGATTTACTAGCACAAGGAGACATGAAACAGCTGGCTGAAGATGTGAA  
GCTGCAGCTGTATAAGTTACTAGAAATTCCTGATCCAGACAAAACTGGGCTACTCTGGCGCAGAAATTA  
GGTCTGGGGATACTTAATAATGCCTTCCGGCTGAGTCCTGCTCCTTCCAAAACACTTATGGACAACATG  
AGGTCTCTGGGGGTACAGTCAGAGAGCTGGTGGAGGCCCTGAGACAAATGGGCTACACCGAAGCAATTGA  
AGTGATCCAGGCAGCCTCCAGCCCAGTGAAGACCACCTCTCAGGCCCACTCGCTGCCTCTCTCGCCTGCC  
TCCACAAGGCAGCAAATAGACGAGCTCCGAGACAGTGACAGTGTCTGCGACAGCGGCGTGGAGACATCCT  
TCCGCAAACCTCAGCTTTACCGAGTCTCTGACCAGTGGTGCCTCACTGCTAACTCTCAACAAAATGCCCA  
TGATTATGGGCAGGAAGGACCTCTAGAAGGCAAAATTTAG

>|cl|NM\_145285.3\_cds\_NP\_660328.2\_1 [gene=NKX2-3] [db\_xref=CCDS:CCDS41558.1]  
[protein=homeobox protein Nkx-2.3] [protein\_id=NP\_660328.2] [location=191..1285] [gbkey=CDS]

ATGATGTTACCAAGCCCGGTACCTCCACCCCTTTCTCAGTCAAAGACATTTTGAATCTGGAGCAGCAGC  
ACCAGCACTTCCATGGTGCACACTTGCAGGCGGACTTGGAGCACCCTTCCACTCTGCGCCCTGCATGCT  
GGCCGCCGCTGAGGGGACGCAATTTTCTGACGGAGGGGAGGAGGACGAGGAAGACGAGGGCGAGAAATTG  
TCCTATTTGAACTCACTAGCCGCAGCAGACGGCCACGGGGATTGAGGGCTGTGTCCCCAGGGCTATGTCC  
ACACGGTCCTGCGAGACTCGTGCAGCGAGCCCAAGGAACATGAAGAGGAGCCCGAGGTCGTGAGGGACCG

GAGCCAAAAAAGCTGCCAGCTGAAGAAGTCTCTAGAGACGGCCGGAGACTGCAAGGCGGCGGAGGAGAGC  
GAGAGGCCGAAGCCACGCAGCCGCCGAAGCCCCGGGTCTCTTCTCGCAAGCCCAGGTCTTCGAGCTGG  
AACGCAGGTTCAAGCAGCAGCGGTACCTGTCGGCACCCGAGCGCGAGCACCTCGCCAGCAGCCTGAAGCT  
CACATCCACTCAGGTGAAAATCTGGTTCCAGAATCGCAGGTACAAGTGCAAGAGACAGCGGCAGGACAAG  
TCTCTGGAGCTTGGCGCACACGCGCCCCCGCCGCCGCGCGCGTGGCTGTCCCGGTGCTGGTGCGGG  
ACGGCAAGCCGTGCGTCACGCCCAGCGCGCAGGCCTACGGCGCGCCCTACAGCGTGGGCGCCAGCGCCTA  
CTCCTACAACAGCTTCCCCGCCTACGGCTATGGGAACTCGGCCGCGGCCGCCGCCGCCGCCGCCGCC  
GCCGCAGCAGCGGCGGCCTACAGCAGCAGCTATGGCTGTGCGTACCCGGCGGGCGGCGGCGGCGGCGGCG  
GCGGGACCTCCGCGGCGACCACTGCCATGCAGCCCGCTGCAGCGCGGCCGGAGGCGGCCCTTTGTGAA  
CGTGAGCAACCTAGGAGGCTTCGGCAGCGGCGGCAGCGCACAGCCGTTGCACCAGGGTACTGCAGCCGGG  
GCCGCGTGCGCTCAGGGCACCTTGACAGGGCATCCGGGCCTGGTAG

>|cl|NM\_021209.4\_cds\_NP\_067032.3\_1 [gene=NLRC4] [db\_xref=CCDS:CCDS33174.1] [protein=NLR  
family CARD domain-containing protein 4 isoform a] [protein\_id=NP\_067032.3] [location=276..3350]  
[gbkey=CDS]

ATGAATTCATAAAGGACAATAGCCGAGCCCTTATTCAAAGAATGGGAATGACTGTTATAAAGCAAATCA  
CAGATGACCTATTTGTATGGAATGTTCTGAATCGCGAAGAAGTAAACATCATTTGCTGCGAGAAGGTGGA  
GCAGGATGCTGCTAGAGGGATCATTCACATGATTTTGAAAAAGGGTTCAGAGTCCTGTAACCTCTTTCTT  
AAATCCCTTAAGGAGTGGAACATCCTCTATTTTCAGGACTTGAATGGACAAAGTCTTTTTCATCAGACAT  
CAGAAGGAGACTTGGACGATTTGGCTCAGGATTTAAAGGACTTGTAACCATACCCCATCTTTTCTGAACTT  
TTATCCCCTTGGTGAAGATATTGACATTATTTTAACTTGAAAAGCACCTTCACAGAACCTGTCCTGTGG  
AGGAAGGACCAACACCATCACCGCGTGGAGCAGCTGACCCTGAATGGCCTCCTGCAGGCTCTTCAGAGCC  
CCTGCATCATTGAAGGGGAATCTGGCAAAGGCAAGTCCACTCTGCTGCAGCGAATTGCCATGCTCTGGGG

CTCCGAAAGTGCAAGGCTCTGACCAAGTTCAAATTCGTCTTCTCCTCCGTCTCAGCAGGGCCCCAGGGT  
GGACTTTTTGAAACCCTCTGTGATCAACTCCTGGATATACCTGGCACAATCAGGAAGCAGACATTCATGG  
CCATGCTGCTGAAGCTGCGGCAGAGGGTCTTTTCTTCTTGATGGCTACAATGAATTCAAGCCCCAGAA  
CTGCCCAGAAATCGAAGCCCTGATAAAGGAAAACACCGCTTCAAGAACATGGTCATCGTCACCACTACC  
ACTGAGTGCCTGAGGCACATACGGCAGTTTGGTGCCTGACTGCTGAGGTGGGGGATATGACAGAAGACA  
GCGCCCAGGCTCTCATCCGAGAAGTGCTGATCAAGGAGCTTGCTGAAGGCTTGTTGCTCCAAATTCAGAA  
ATCCAGGTGCTTGAGGAATCTCATGAAGACCCCTCTCTTGTGGTCATCACTTGTGCAATCCAGATGGGT  
GAAAGTGAGTTCCTCTCACACACAAACAACGCTGTTCCATACCTTCTATGATCTGTTGATACAGAAAA  
ACAAACACAAACATAAAGGTGTGGCTGCAAGTGACTTCATTCGGAGCCTGGACCACTGTGGAGACCTAGC  
TCTGGAGGGTGTGTTCTCCACAAGTTTGATTCGAACTGCAGGATGTGTCCAGCGTGAATGAGGATGTC  
CTGCTGACAACTGGGCTCCTCTGTAAATATACAGCTCAAAGGTTCAAGCCAAAGTATAAATTCTTTCACA  
AGTCATTCCAGGAGTACACAGCAGGACGAAGACTCAGCAGTTTATTGACGTCTCATGAGCCAGAGGAGGT  
GACCAAGGGGAATGGTTACTTGCAGAAAATGGTTTCCATTCGGACATTACATCCACTTATAGCAGCCTG  
CTCCGGTACACCTGTGGGTCTCTGTGGAAGCCACCAGGGCTGTTATGAAGCACCTCGCAGCAGTGTATC  
AACACGGCTGCCTTCTCGGACTTTCATCGCCAAGAGGCCTCTCTGGAGACAGGAATCTTTCGAAAGTGT  
GAAAAACACCACTGAGCAAGAAATTCTGAAAGCCATAAACATCAATTCCTTGTAGAGTGTGGCATCCAT  
TTATATCAAGAGAGTACATCCAAATCAGCCCTGAGCCAAGAATTTGAAGCTTCTTTCAAGGTAAAAGCT  
TATATATCAACTCAGGGAACATCCCCGATTACTTATTTGACTTCTTTGAACATTTGCCCAATTGTGCAAG  
TGCCCTGGACTTCATTAAACTGGACTTTTATGGGGGAGCTATGGCTTCATGGGAAAAGGCTGCAGAAGAC  
ACAGGTGGAATCCACATGGAAGAGGCCCCAGAAACCTACATTCAGCAGGGCTGTATCTTTGTTCTTCA  
ACTGGAAGCAGGAATTCAGGACTCTGGAGGTCACACTCCGGGATTCAGCAAGTTGAATAAGCAAGATAT  
CAGATATCTGGGGAAAATATTCAGCTCTGCCACAAGCCTCAGGCTGCAAATAAAGAGATGTGCTGGTGTG  
GCTGGAAGCCTCAGTTTGGTCTCAGCACCTGTAAGAACATTTATTCTCTCATGGTGGAAGCCAGTCCCC  
TCACCATAGAAGATGAGAGGCACATCACATCTGTAACAAACCTGAAAACCTTGAGTATTCATGACCTACA  
GAATCAACGGCTGCCGGGTGGTCTGACTGACAGCTTGGGTAAGTTGAAGAACCTTACAAAGCTCATAATG

GATAACATAAAGATGAATGAAGAAGATGCTATAAACTAGCTGAAGGCCTGAAAAACCTGAAGAAGATGT  
GTTTATTTCAATTTGACCCACTTGTCTGACATTGGAGAGGGAATGGATTACATAGTCAAGTCTCTGTCAAG  
TGAACCCTGTGACCTTGAAGAAATTCAATTAGTCTCCTGCTGCTTGTCTGCAAATGCAGTGAAAATCCTA  
GCTCAGAATCTTCACAATTTGGTCAAACCTGAGCATTCTTGATTTATCAGAAAATTACCTGGAAAAAGATG  
GAAATGAAGCTCTTCATGAACTGATCGACAGGATGAACGTGCTAGAACAGCTCACCGCACTGATGCTGCC  
CTGGGGCTGTGACGTGCAAGGCAGCCTGAGCAGCCTGTTGAAACATTTGGAGGAGGTCCCACAACCTCGTC  
AAGCTTGGGTTGAAAACTGGGAGACTCACAGATACAGAGATTAGAATTTTAGGTGCATTTTTTGGAAAGA  
ACCCTCTGAAAACTTCCAGCAGTTGAATTTGGCGGGAAATCGTGTGAGCAGTGATGGATGGCTTGCCTT  
CATGGGTGTATTTGAGAATCTTAAGCAATTAGTGTTTTTTGACTTTAGTACTAAAGAATTTCTACCTGAT  
CCAGCATTAGTCAGAAACTTAGCCAAGTGTTATCCAAGTAACTTTTCTGCAAGAAGCTAGGCTTGTTG  
GGTGGCAATTTGATGATGATGATCTCAGTGTTATTACAGGTGCTTTTAACTAGTAACTGCTTAA

>|cl|NM\_000271.5\_cds\_NP\_000262.2\_1 [gene=NPC1] [db\_xref=CCDS:CCDS11878.1] [protein=NPC  
intracellular cholesterol transporter 1 precursor] [protein\_id=NP\_000262.2] [location=164..4000]  
[gbkey=CDS]

ATGACCGCTCGCGGCCTGGCCCTTGGCCTCCTCCTGCTGCTACTGTGTCCAGCGCAGGTGTTTTACAGT  
CCTGTGTTTGGTATGGAGAGTGTGGAATTGCATATGGGGACAAGAGGTACAATTGCGAATATTCTGGCCC  
ACCAAAACCATTGCCAAAGGATGGATATGACTTAGTGCAGGAACTCTGTCCAGGATTCTTCTTTGGCAAT  
GTCAGTCTCTGTTGTGATGTTCTGGCAGCTTCAGACACTAAAAGACAACCTGCAGCTGCCTCTACAGTTTC  
TGTCCAGATGTCCATCCTGTTTTTATAACCTACTGAACCTGTTTTGTGAGCTGACATGTAGCCCTCGACA  
GAGTCAGTTTTTGAATGTTACAGCTACTGAAGATTATGTTGATCCTGTTACAAACCAGACGAAAAACAAAT  
GTGAAAGAGTTACAATACTACGTCTGGACAGAGTTTTGCCAATGCAATGTACAATGCCTGCCGGGATGTGG  
AGGCCCCCTCAAGTAATGACAAGGCCCTGGGACTCCTGTGTGGGAAGGACGCTGACGCCTGTAATGCCAC

CAACTGGATTGAATACATGTTCAATAAGGACAATGGACAGGCACCTTTTACCATCACTCCTGTGTTTTCA  
GATTTTCCAGTCCATGGGATGGAGCCCATGAACAATGCCACCAAAGGCTGTGACGAGTCTGTGGATGAGG  
TCACAGCACCATGTAGCTGCCAAGACTGCTCTATTGTCTGTGGCCCCAAGCCCCAGCCCCACCTCCTCC  
TGCTCCCTGGACGATCCTTGGCTTGGACGCCATGTATGTCATCATGTGGATCACCTACATGGCGTTTTTG  
CTTGTGTTTTTTGGAGCATTTTTTGCAGTGTGGTGCTACAGAAAACGGTATTTTGTCTCCGAGTACACTC  
CCATCGATAGCAATATAGCTTTTTCTGTTAATGCAAGTGACAAAGGAGAGGCGTCCTGCTGTGACCCTGT  
CAGCGCAGCATTTGAGGGCTGCTTGAGGCGGCTGTTCACACGCTGGGGGTCTTTCTGCGTCCGAAACCCT  
GGCTGTGTCATTTTCTTCTCGCTGGTCTTCATTACTGCGTGTTTCGTCAGGCCTGGTGTGTGTCGGGTCA  
CAACCAATCCAGTTGACCTCTGGTCAGCCCCCAGCAGCCAGGCTCGCCTGGAAAAAGAGTACTTTGACCA  
GCACTTTGGGCCTTTCTTCCGGACGGAGCAGCTCATCATCCGGGGCCCTCTCACTGACAAACACATTTAC  
CAGCCATACCCTTCGGGAGCTGATGTACCCTTTGGACCTCCGCTTGACATACAGATACTGCACCAGGTTC  
TTGACTTACAAATAGCCATCGAAAACATTACTGCCTCTTATGACAATGAGACTGTGACACTTCAAGACAT  
CTGCTTGGCCCCCTTTTACCCTATAACACGAACTGCACCATTTTGAGTGTGTAAATTACTTCCAGAAC  
AGCCATTCCGTGCTGGACCACAAGAAAGGGGACGACTTCTTTGTGTATGCCGATTACCACACGCACTTTC  
TGTA CTGCGTACGGGCTCCTGCCTCTCTGAATGATACAAGTTTGCTCCATGACCCTTGTCTGGGTACGTT  
TGGTGGACCAGTGTTCCCGTGGCTTGTGTTGGGAGGCTATGATGATCAAACTACAATAACGCCACTGCC  
CTTGTGATTACCTTCCCTGTCAATAATTACTATAATGATACAGAGAAGCTCCAGAGGGCCCAGGCCTGGG  
AAAAAGAGTTTATTAATTTTGTGAAAACTACAAGAATCCCAATCTGACCATTTCTTCACTGCTGAACG  
AAGTATTGAAGATGAACTAAATCGTGAAAGTGACAGTGATGTCTTCACCGTTGTAATTAGCTATGCCATC  
ATGTTTCTATATATTTCCCTAGCCTTGGGGCACATGAAAAGCTGTGCGAGGCTTCTGGTGGATTCTGAAGG  
TCTCACTAGGCATCGCGGGCATCTTGATCGTGCTGAGCTCGGTGGCTTGCTCCTTGGGTGTCTTCAGCTA  
CATTGGGTTGCCCTTGACCCTCATTGTGATTGAAGTCATCCCGTTCCTGGTGCTGGCTGTTGGAGTGGAC  
AACATCTTCATTCTGGTGCAGGCCTACCAGAGAGATGAACGTCTTCAAGGGGAAACCCTGGATCAGCAGC  
TGGGCAGGGTCTAGGAGAAGTGGCTCCAGTATGTTCTGTCATCCTTTTCTGAGACTGTAGCATTTTT  
CTTAGGAGCATTGTCCGTGATGCCAGCCGTGCACACCTTCTCTCTTTGCGGGATTGGCAGTCTTCATT

GACTTCTTCTGCAGATTACCTGTTTCGTGAGTCTCTTGGGGTTAGACATTAAACGTCAAGAGAAAAATC  
GGCTAGACATCTTTTGCTGTGTCAGAGGTGCTGAAGATGGAACAAGCGTCCAGGCCTCAGAGAGCTGTTT  
GTTTCGCTTCTTCAAAAACCTCCTATTCTCCACTTCTGCTAAAGGACTGGATGAGACCAATTGTGATAGCA  
ATATTTGTGGGTGTTCTGTCATTGAGCATCGCAGTCTGAACAAAGTAGATATTGGATTGGATCAGTCTC  
TTTCGATGCCAGATGACTCCTACATGGTGGATTATTTCAAATCCATCAGTCAGTACCTGCATGCGGGTCC  
GCCTGTGTACTTTGTCCTGGAGGAAGGGCACGACTACACTTCTTCCAAGGGGCAGAACATGGTGTGCGGC  
GGCATGGGCTGCAACAATGATTCCCTGGTGCAGCAGATATTTAACGCGGCGCAGCTGGACAACATAACCC  
GAATAGGCTTCGCCCCCTCGTCTGGATCGACGATTATTTGACTGGGTGAAGCCACAGTCGTCTTGCTG  
TCGAGTGGACAATATCACTGACCAGTTCTGCAATGCTTCAGTGGTTGACCCTGCCTGCGTTCGCTGCAGG  
CCTCTGACTCCGGAAGGCAAACAGAGGCCTCAGGGGGGAGACTTCATGAGATTCTGCCCATGTTCTTT  
CGGATAACCCTAACCCCAAGTGTGGCAAAGGGGGACATGCTGCCTATAGTTCTGCAGTTAACATCCTCCT  
TGGCCATGGCACCAGGGTCGGAGCCACGTA CTTCATGACCTACCACACCGTGCTGCAGACCTCTGCTGAC  
TTTATTGACGCTCTGAAGAAAGCCCGACTTATAGCCAGTAATGTCACCGAAACCATGGGCATTAACGGCA  
GTGCCTACCGAGTATTTCTTACAGTGTGTTTTATGTCTTCTACGAACAGTACCTGACCATCATTGACGA  
CACTATCTTCAACCTCGGTGTGTCCCTGGGCGCGATATTTCTGGTGACCATGGTCCTCCTGGGCTGTGAG  
CTCTGGTCTGCAGTCATCATGTGTGCCACCATCGCCATGGTCTTGGTCAACATGTTTGGAGTTATGTGGC  
TCTGGGGCATCAGTCTGAACGCTGTATCCTTGGTCAACCTGGTGATGAGCTGTGGCATCTCCGTGGAGTT  
CTGCAGCCACATAACCAGAGCGTTACGGTGAGCATGAAAGGCAGCCGCGTGGAGCGCGCGGAAGAGGCA  
CTTGCCACATGGGCAGCTCCGTGTTCAGTGGAATCACACTTACAAAATTTGGAGGGATTGTGGTGTGG  
CTTTTGCCAAATCTCAAATTTCCAGATATTCTACTTCAGGATGTATTTGGCCATGGTCTTACTGGGAGC  
CACTCACGGATTAATATTTCTCCCTGTCTTACTCAGTTACATAGGGCCATCAGTAAATAAAGCCAAAAGT  
TGTGCCACTGAAGAGCGATACAAAGGAACAGAGCGCGAACGGCTTCTAAATTTCTAG

>|NM\_030759.5\_cds\_NP\_110386.2\_1 [gene=NRBF2] [db\_xref=CCDS:CCDS7268.1] [protein=nuclear receptor-binding factor 2 isoform 1] [protein\_id=NP\_110386.2] [location=144..1007] [gbkey=CDS]

ATGGAAGTAATGGAAGGACCCCTCAACCTGGCTCATCAACAGAGCAGACGAGCAGACCGTTTATTAGCTG  
CAGGCAAATACGAAGAGGCTATTTCTTGTCACAAAAAGGCTGCAGCATATCTTTCTGAAGCCATGAAGCT  
GACACAGTCAGAGCAGGCTCATCTTTCACTGGAATTGCAAAGGGATAGCCATATGAAACAGCTCCTCCTC  
ATCCAAGAGAGATGGAAGGGGCCAGCGTGAAGAAAGATTGAAAGCCCAGCAGAACACAGACAAGGATG  
CAGCTGCCCATCTTCAGACATCTCACAAACCCTCTGCAGAGGATGCAGAGGGCCAGAGTCCCCTTTCTCA  
GAAGTACAGCCCTTCACAGAGAAATGCCTGCCTGAGATTCAGGGGATCTTTGACAGGGATCCAGACACA  
CTACTTTATTTACTTCAGCAAAAGAGTGAGCCAGCAGAGCCATGTATTGGAAGCAAAGCCCCAAAAGATG  
ATAAAACAATTATAGAGGAGCAGGCAACCAAAATTGCAGATTTGAAGAGGCATGTGGAATTCCTTGTGGC  
TGAGAATGAAAGATTAAGGAAAGAAAATAAACAACTAAAGGCTGAAAAGGCCAGACTTCTAAAAGGTCCA  
ATAGAAAAGGAGCTGGATGTAGATGCTGATTTTGTAGAAACGTCAGAGTTATGGAGCTTGCCACCACATG  
CAGAACTGCTACAGCCTCCTCAACCTGGCAGAAGTTCGCAGCAAATACTGGGAAAGCCAAGGACATTCC  
AATCCCCAATCTTCTCCTTGGATTTTCCATCTCCAGAACTTCTCTTATGGAGCTCTCTGAGGATATT  
CTGAAAGGATTTATGAATAATTAA

>|NM\_001159995.3\_cds\_NP\_001153467.1\_1 [gene=NRG1]  
[db\_xref=GeneID:3084,HGNC:HGNC:7997,MIM:142445] [protein=pro-neuregulin-1, membrane-bound isoform isoform HRG-beta1c] [protein\_id=NP\_001153467.1] [location=151..1974] [gbkey=CDS]

ATGGGGAAAGGACGCGCGGGCCGAGTTGGCACCACAGCCTTGCCTCCCCGATTGAAAGAGATGAAAAGCC  
AGGAATCGGCTGCAGGTTCCAACTAGTCCTTCGGTGTGAAACCAGTTCTGAATACTCCTCTCTCAGATT  
CAAGTGGTTCAAGAATGGGAATGAATTGAATCGAAAAACAAACCACAAAATATCAAGATACAAAAAAG  
CCAGGGAAGTCAGAACTTCGCATTAACAAAGCATCACTGGCTGATTCTGGAGAGTATATGTGCAAAGTGA

TCAGCAAATTAGGAAATGACAGTGCCTCTGCCAATATCACCATCGTGGAATCAAACGAGATCATCACTGG  
TATGCCAGCCTCAACTGAAGGAGCATATGTGTCTTCAGCTACATCTACATCCACCACTGGGACAAGCCAT  
CTTGTAATGTGCGGAGAAGGAGAAAACCTTCTGTGTGAATGGAGGGGAGTGCTTCATGGTGAAAGACC  
TTTCAAACCCCTCGAGATACTTGTGCAAGTGCCCAAATGAGTTTACTGGTGATCGCTGCCAAAACCTACGT  
AATGGCCAGCTTCTACAAGCATCTTGGGATTGAATTTATGGAGGCGGAGGAGCTGTACCAGAAGAGAGTG  
CTGACCATAACCGGCATCTGCATCGCCCTCCTTGTGGTCGGCATCATGTGTGTGGTGGCCTACTGCAAAA  
CCAAGAAACAGCGGAAAAAGCTGCATGACCGTCTTCGGCAGAGCCTTCGGTCTGAACGAAACAATATGAT  
GAACATTGCCAATGGGCCTCACCATCCTAACCCACCCCCGAGAATGTCCAGCTGGTGAATCAATACGTA  
TCTAAAAACGTCATCTCCAGTGAGCATATTGTTGAGAGAGAAGCAGAGACATCCTTTTCCACCAGTCACT  
ATACTTCCACAGCCCATCACTCCACTACTGTCACCCAGACTCCTAGCCACAGCTGGAGCAACGGACACAC  
TGAAAGCATCCTTTCCGAAAGCCACTCTGTAATCGTGATGTCATCCGTAGAAAACAGTAGGCACAGCAGC  
CCAACTGGGGGCCCAAGAGGACGTCTTAATGGCACAGGAGGCCCTCGTGAATGTAACAGCTTCCTCAGGC  
ATGCCAGAGAAACCCCTGATTCTACCGAGACTCTCCTCATAGTGAAAGGTATGTGTCAGCCATGACCAC  
CCCGGCTCGTATGTCACCTGTAGATTTCCACACGCCAAGCTCCCCCAAATCGCCCCCTTCGGAAATGTCT  
CCACCCGTGTCCAGCATGACGGTGTCCATGCCTTCCATGGCGGTCAGCCCCTTCATGGAAGAAGAGAGAC  
CTCTACTTCTCGTGACACCACCAAGGCTGCGGGAGAAGAAGTTTGACCATCACCTCAGCAGTTCAGCTC  
CTTCCACCACAACCCCGCGCATGACAGTAACAGCCTCCCTGCTAGCCCCCTTGAGGATAGTGGAGGATGAG  
GAGTATGAAACGACCCAAGAGTACGAGCCAGCCCAAGAGCCTGTTAAGAAACTCGCCAATAGCCGGCGGG  
CCAAAAGAACCAAGCCCAATGGCCACATTGCTAACAGATTGGAAGTGGACAGCAACACAAGCTCCCAGAG  
CAGTAACTCAGAGAGTGAAACAGAAGATGAAAGAGTAGGTGAAGATACGCCTTTCCTGGGCATACAGAAC  
CCCCTGGCAGCCAGTCTTGAGGCAACACCTGCCTTCCGCCTGGCTGACAGCAGGACTAACCCAGCAGGCC  
GCTTCTCGACACAGGAAGAAATCCAGGCCAGGCTGTCTAGTGTAATTGCTAACCAAGACCCTATTGCTGT  
ATAA

[illegible]

CATGTCATCAGGAGAGAACTGAGACCACCTTCTCTGGGAGCCACTCCTGTTCTCCTTCTCACCCTGCT  
CCACAGCCACACCCACCTCCAGCCACAGACACGAGAGCCACACGTGGAGCCTGGAACGTTCTGAGAGCCT  
GACTTCTGACTCCCAGTCGGGGATCATGCTATCATCAGTGGGTACCAGCAAATGCAACAGCCCAGCATGT  
GTGGAGGCCCCGGGCAAGGCGGGCAGCAGCCTACAACCTGGAGGAGCGGCGCAGGGGCCACCGCGCCACCCT  
ATCACGATTCCGTGGACTCCCTTCGCGACTCCCCACACAGCGAGAGGTACGTGTCGGCCCTGACCACGCC  
CGCGCGCCTCTCGCCCGTGGACTTCCACTACTCGCTGGCCACGCAGGTGCCAACTTTCGAGATCACGTCC  
CCCAACTCGGCGCACGCCGTGTCGCTGCCGCCGGCGGCGCCCATCAGTTACCGCCTGGCCGAGCAGCAGC  
CGTTACTGCGGCACCCGGCGCCCCCGGGACCCGGACCCGGGCCCCGGGCCCCGGGCCCCGGCGCAGA  
CATGCAGCGCAGCTATGACAGCTACTATTACCCCGCGGCGGGGCCCGACCGCGGCGCGGGACCTGCGCG  
CTCGGCGGCAGCCTGGGCAGCCTGCCTGCCAGCCCCCTTCGCATCCCCGAGGACGACGAGTACGAGACCA  
CGCAGGAGTGCGCGCCCCCGCCGCCCGCGGCCGCGCGCGCGCGGTGCGTCCCGCAGGACGTCGGCGGG  
GCCCCGGCGCTGGCGCCGCTCGCGCCTAACGGGCTGGCGGCGCAGCGCGCACGGGCGGCGAGGGACTCG  
CTGTCGCTGAGCAGCGGCTCGGGCGGCGGCTCAGCCTCGGCGTCGGACGACGACGCGGACGACGCGGACG  
GGGCGCTGGCGGCCGAGAGCACACCTTTCCTGGGCCTGCGTGGGGCGCACGACGCGCTGCGCTCGGACTC  
GCCGCCACTGTGCCCGGCGGCCGACAGCAGGACTTACTACTACTGGACAGCCACAGCACGCGGGGCCAGC  
AGCAGACACAGCCGCGGGCCGCCCCGCGGGCCAAGCAGGACTCGGCGCCACTCTAG

>|cl|NM\_001010848.4\_cds\_NP\_001010848.2\_1 [gene=NRG3] [db\_xref=CCDS:CCDS31233.1]  
[protein=pro-neuregulin-3, membrane-bound isoform isoform 1] [protein\_id=NP\_001010848.2]  
[location=148..2238] [gbkey=CDS]

ATGAGTGAAGGGGCGGCCGCTGCCTCGCCACCTGGTGCCGCTTCGGCAGCCGCCGCTCGGCCGAGGAGG  
GCACCGCGGCGGCTGCGGCGGCGGCAGCGGCGGGCGGGGGCCCGACGGCGGCGGCGAAGGGGCGGCCGA  
GCCCCCGGGAGTTACGCTGTAGCGACTGCATCGTGTGGAACCGGCAGCAGACGTGGCTGTGCGTGGTA

CCTCTGTTTCATCGGCTTCATCGGCCTGGGGCTCAGCCTCATGCTTCTCAAATGGATCGTGGTGGGCTCCG  
TCAAGGAGTACGTGCCCACCGACCTAGTGGACTCCAAGGGGATGGGCCAGGACCCCTTCTCCTCTCCAA  
GCCCAGCTCTTTCCCAAGGCCATGGAGACCACCACCACTACCACTTCCACCACGTCCCCGCCACCCCC  
TCCGCCGGGGGTGCCGCTCCTCCAGGACGCCCAACCGGATTAGCACTCGCCTGACCACCATCACGCGGG  
CGCCCACTCGCTTCCCCGGGCACCGGGTGCCCATCCGGGCCAGCCCGCGCTCCACCACAGCACGGAACAC  
TGCGGCCCCTGCGACGGTCCCGTCCACCACGGCCCCGTTCTTCAGTAGCAGCACGCTGGGCTCCCGACCC  
CCGGTGCCAGGAACTCCAAGTACCCAGGCAATGCCCTCCTGGCCTACTGCGGCATACGCTACCTCCTCCT  
ACCTTCACGATTCTACTCCCTCCTGGACCCTGTCTCCCTTTCAGGATGCTGCCTCCTCTTCTCCTCTTC  
TTCCTCCTCCGCTACCACCACCACACCAGAACTAGCACCAGCCCCAAATTCATACGACGACATATTCC  
ACAGAGCGATCCGAGCACTTCAAACCCTGCCGAGACAAGGACCTTGCATACTGTCTCAATGATGGCGAGT  
GCTTTGTGATCGAAACCCTGACCGGATCCCATAAACACTGTCGGTGCAAAGAAGGCTACCAAGGAGTCCG  
TTGTGATCAATTTCTGCCGAAAACCTGATTCCATCTTATCGGATCCAACAGACCACTTGGGGATTGAATTC  
ATGGAGAGTGAAGAAGTTTATCAAAGGCAGGTGCTGTCAATTCATGTATCATCTTTGGAATTGTCATCG  
TGGGCATGTTCTGTGCAGCATTCTACTTCAAAGCAAGAAACAAGCTAAACAAATCCAAGAGCAGCTGAA  
AGTGCCACAAAATGGTAAAAGCTACAGTCTCAAAGCATCCAGCACAATGGCAAAGTCAGAGAACTTGGTG  
AAGAGCCATGTCCAGCTGCAAAATTATTCAAAGGTGGAAAGGCATCCTGTGACTGCATTGGAGAAAATGA  
TGGAGTCAAGTTTTGTGCGCCCCCAGTCATTCCCTGAGGTCCCTTCTCCTGACAGAGGAAGCCAGTCTGT  
CAAACACCACAGGAGTCTATCCTCTTGCTGCAGCCCAGGGCAAAGAAGTGGCATGCTCCATAGGAATGCC  
TTCAGAAGGACACCCCCGTACCCCCGAAGTAGGCTAGGTGGAATTGTGGGACCAGCATATCAGCAACTCG  
AAGAATCAAGGATCCCAGACCAGGATACGATACCTTGCCAAGGGTATTCATCCAGTGGTTTAAAAACCCA  
ACGAAATACATCAATAAATATGCAACTGCCTTCAAGAGAGACAAACCCCTATTTTAATAGCTTGGAGCAA  
AAGGACCTGGTGGGCTATTCATCCACAAGGGCCAGTTCTGTGCCCATCATCCCTTCAGTGGGTTTAGAGG  
AAACCTGCCTGCAAATGCCAGGGATTTCTGAAGTCAAAGCATCAAATGGTGCAAAAACCTCTATTTCAGC  
TGACGTTGTCAATGTGAGTATTCCAGTCAGCGATTGTCTTATAGCAGAACAAACAAGAAGTGAAAATATTG  
CTAGAAACTGTCCAGGAGCAGATCCGAATTCTGACTGATGCCAGACGGTCAGAAGACTACGAACTGGCCA

GCGTAGAAACCGAGGACAGTGCAAGCGAAAACACAGCCTTTCTCCCCCTGAGTCCCACAGCCAAATCAGA  
ACGAGAGGCGCAATTTGTCTTAAGAAATGAAATACAAAGAGACTCTGCATTGACCAAGTGA

>|cl|NM\_000918.4\_cds\_NP\_000909.2\_1 [gene=P4HB] [db\_xref=CCDS:CCDS11787.1] [protein=protein  
disulfide-isomerase precursor] [protein\_id=NP\_000909.2] [location=65..1591] [gbkey=CDS]

ATGCTGCGCCGCGCTCTGCTGTGCCTGGCCGTGGCCGCCCTGGTGCGCGCCGACGCCCCGAGGAGGAGG  
ACCACGTCCTGGTGCTGCGGAAAAGCAACTTCGCGGAGGCGCTGGCGGCCACAAGTACCTGCTGGTGGA  
GTTCTATGCCCCCTGGTGTTGGCCACTGCAAGGCTCTGGCCCCCTGAGTATGCCAAAGCCGCTGGGAAGCTG  
AAGGCAGAAGGTTCCGAGATCAGGTTGGCCAAGGTGGACGCCACGGAGGAGTCTGACCTGGCCCAGCAGT  
ACGGCGTGCGCGGCTATCCCACCATCAAGTTCTTCAGGAATGGAGACACGGCTTCCCCAAGGAATATAC  
AGCTGGCAGAGAGGCTGATGACATCGTGAAGTGGCTGAAGAAGCGCACGGGCCCCGGCTGCCACCACCCTG  
CCTGACGGCGCAGCTGCAGAGTCCTTGGTGAGTCCAGCGAGGTGGCTGTCATCGGCTTCTTCAAGGACG  
TGGAGTCGGACTCTGCCAAGCAGTTTTTGCAGGCAGCAGAGGCCATCGATGACATACCATTGGGATCAC  
TTCCAACAGTGACGTGTTCTCCAAATACCAGCTCGACAAAGATGGGGTTGTCCTCTTTAAGAAGTTTGAT  
GAAGGCCGGAACAACTTTGAAGGGGAGGTCACCAAGGAGAACCTGCTGGACTTTATCAAACACAACCAGC  
TGCCCCCTTGTCATCGAGTTCACCGAGCAGACAGCCCCGAAGATTTTTGGAGGTGAAATCAAGACTCACAT  
CCTGCTGTTCTTGCCCAAGAGTGTGTCTGACTATGACGGCAAAGTGGAGCAACTTCAAAACAGCAGCCGAG  
AGCTTCAAGGGCAAGATCCTGTTTCATCTTCATCGACAGCGACCACACCGACAACCAGCGCATCCTCGAGT  
TCTTTGGCCTGAAGAAGGAAGAGTGCCCGGCCGTGCGCCTCATCACCTGGAGGAGGAGATGACCAAGTA  
CAAGCCCGAATCGGAGGAGCTGACGGCAGAGAGGATCACAGAGTTCTGCCACCGCTTCTGGAGGGGCAAA  
ATCAAGCCCCACCTGATGAGCCAGGAGCTGCCGGAGGACTGGGACAAGCAGCCTGTCAAGGTGCTTGTTG  
GGAAGAACTTTGAAGACGTGGCTTTTGATGAGAAAAAAAACGTCTTTGTGGAGTTCTATGCCCCATGGTG  
TGGTCACTGCAAACAGTTGGCTCCCATTTGGGATAAACTGGGAGAGACGTACAAGGACCATGAGAACATC

GTCATCGCCAAGATGGACTCGACTGCCAACGAGGTGGAGGCCGTCAAAGTGACAGCTTCCCCACACTCA  
AGTTCTTTCCTGCCAGTGCCGACAGGACGGTCATTGATTACAACGGGGAACGCACGCTGGATGGTTTTAA  
GAAATTCCTGGAGAGCGGTGGCCAGGATGGGGCAGGGGATGATGACGATCTCGAGGACCTGGAAGAAGCA  
GAGGAGCCAGACATGGAGGAAGACGATGATCAGAAAAGCTGTGAAAGATGAACTGTAA

>|cl|NM\_001618.4\_cds\_NP\_001609.2\_1 [gene=PARP1] [db\_xref=CCDS:CCDS1554.1] [protein=poly [ADP-  
ribose] polymerase 1] [protein\_id=NP\_001609.2] [location=165..3209] [gbkey=CDS]

ATGGCGGAGTCTTCGATAAGCTCTATCGAGTCGAGTACGCCAAGAGCGGGCGCGCCTCTTGCAAGAAAT  
GCAGCGAGAGCATCCCCAAGGACTCGCTCCGGATGGCCATCATGGTGCAAGTCGCCATGTTTGATGGAAA  
AGTCCCACACTGGTACCACTTCTCCTGCTTCTGGAAGGTGGGCCACTCCATCCGGCACCCCTGACGTTGAG  
GTGGATGGGTTCTCTGAGCTTCGGTGGGATGACCAGCAGAAAAGTCAAGAAGACAGCGGAAGCTGGAGGAG  
TGACAGGCAAAGGCCAGGATGGAATTGGTAGCAAGGCAGAGAAGACTCTGGGTGACTTTGCAGCAGAGTA  
TGCCAAGTCCAACAGAAGTACGTGCAAGGGGTGTATGGAGAAGATAGAAAAGGGCCAGGTGCGCCTGTCC  
AAGAAGATGGTGGACCCGGAGAAGCCACAGCTAGGCATGATTGACCGCTGGTACCATCCAGGCTGCTTTG  
TCAAGAACAGGGAGGAGCTGGGTTTCCGGCCCGAGTACAGTGCGAGTCAGCTCAAGGGCTTCAGCCTCCT  
TGCTACAGAGGATAAAGAAGCCCTGAAGAAGCAGCTCCAGGAGTCAAGAGTGAAGGAAAGAGAAAAGGC  
GATGAGGTGGATGGAGTGGATGAAGTGGCGAAGAAGAAATCTAAAAAAGAAAAAGACAAGGATAGTAAGC  
TTGAAAAAGCCCTAAAGGCTCAGAACGACCTGATCTGGAACATCAAGGACGAGCTAAAGAAAGTGTGTTC  
AACTAATGACCTGAAGGAGCTACTCATCTTCAACAAGCAGCAAGTGCCTTCTGGGGAGTCGGCGATCTTG  
GACCGAGTAGCTGATGGCATGGTGTTCGGTGCCCTCCTTCCCTGCGAGGAATGCTCGGGTCAGCTGGTCT  
TCAAGAGCGATGCCTATTACTGCACTGGGGACGTCACTGCCTGGACCAAGTGTATGGTCAAGACACAGAC  
ACCCAACCGGAAGGAGTGGGTAACCCCAAAGGAATTCCGAGAAATCTCTTACCTCAAGAAATTGAAGGTT  
AAAAAACAGGACCGTATATTCCCCCAGAAACCAGCGCCTCCGTGGCGGCCACGCCTCCGCCCTCCACAG

CCTCGGCTCCTGCTGCTGTGAACTCCTCTGCTTCAGCAGATAAGCCATTATCCAACATGAAGATCCTGAC  
TCTCGGGAAGCTGTCCCGGAACAAGGATGAAGTGAAGGCCATGATTGAGAACTCGGGGGGAAGTTGACG  
GGGACGGCCAACAAGGCTTCCCTGTGCATCAGCACCAAAAAGGAGGTGGAAGATGAATAAGAAGATGG  
AGGAAGTAAAGGAAGCCAACATCCGAGTTGTGTCTGAGGACTTCCTCCAGGACGTCTCCGCCTCCACCAA  
GAGCCTTCAGGAGTTGTTCTTAGCGCACATCTTGTCCCCTTGGGGGGCAGAGGTGAAGGCAGAGCCTGTT  
GAAGTTGTGGCCCCAAGAGGGGAAGTCAGGGGCTGCGCTCTCAAAAAAAGCAAGGGCCAGGTCAAGGAGG  
AAGGTATCAACAAATCTGAAAAGAGAATGAAATTAAGTCTTAAAGGAGGAGCAGCTGTGGATCCTGATTC  
TGGACTGGAACACTCTGCGCATGTCCTGGAGAAAGGTGGGAAGGTCTTCAGTGCCACCCTTGGCCTGGTG  
GACATCGTTAAAGGAACCAACTCTACTACAAGCTGCAGCTTCTGGAGGACGACAAGGAAAACAGGTATT  
GGATATTCAGGTCTGGGGCCGTGTGGGTACGGTGATCGGTAGCAACAACTGGAACAGATGCCGTCCAA  
GGAGGATGCCATTGAGCACTTCATGAAATTATATGAAGAAAAACCGGGAACGCTTGGCACTCCAAAAAT  
TTCACGAAGTATCCCAAAAAGTTCTACCCCTGGAGATTGACTATGGCCAGGATGAAGAGGCAGTGAAGA  
AGCTGACAGTAAATCCTGGCACCAAGTCCAAGCTCCCCAAGCCAGTTCAGGACCTCATCAAGATGATCTT  
TGATGTGGAAGTATGAAGAAAGCCATGGTGGAGTATGAGATCGACCTTCAGAAGATGCCCTTGGGGAAG  
CTGAGCAAAAGGCAGATCCAGGCCGCATACTCCATCCTCAGTGAGGTCCAGCAGGCGGTGTCTCAGGGCA  
GCAGCGACTCTCAGATCCTGGATCTCTCAAATCGCTTTTACACCCTGATCCCCACGACTTTGGGATGAA  
GAAGCCTCCGCTCCTGAACAATGCAGACAGTGTGCAGGCCAAGGTGGAATGCTTGACAACCTGCTGGAC  
ATCGAGGTGGCCTACAGTCTGCTCAGGGGAGGGTCTGATGATAGCAGCAAGGATCCCATCGATGTCAACT  
ATGAGAAGCTCAAACTGACATTAAGGTGGTTGACAGAGATTCTGAAGAAGCCGAGATCATCAGGAAGTA  
TGTTAAGAACACTCATGCAACCACACACAATGCGTATGACTTGGAAGTCATCGATATCTTTAAGATAGAG  
CGTGAAGGCGAATGCCAGCGTTACAAGCCCTTTAAGCAGCTTCATAACCGAAGATTGCTGTGGCACGGGT  
CCAGGACCACCAACTTTGCTGGGATCCTGTCCCAGGGTCTTCGGATAGCCCCGCCTGAAGCGCCCGTGAC  
AGGCTACATGTTTGGTAAAGGGATCTATTCGCTGACATGGTCTCCAAGAGTGCCAACTACTGCCATACG  
TCTCAGGGAGACCAATAGGCTTAATCCTGTTGGGAGAAGTTGCCCTTGGAACATGTATGAACTGAAGC  
ACGCTTCACATATCAGCAAGTTACCCAAGGGCAAGCACAGTGTCAAAGGTTTGGGCAAACTACCCCTGA

TCCTTCAGCTAACATTAGTCTGGATGGTGTAGACGTTCTTGGGACCGGGATTTCATCTGGTGTGAAT  
GACACCTCTCTACTATATAACGAGTACATTGTCTATGATATTGCTCAGGTAAATCTGAAGTATCTGCTGA  
AACTGAAATTCAATTTTAAGACCTCCCTGTGGTAA

>|cl|NM\_003768.5\_cds\_NP\_003759.1\_1 [gene=PEA15] [db\_xref=CCDS:CCDS1199.1] [protein=astrocytic  
phosphoprotein PEA-15 isoform b] [protein\_id=NP\_003759.1] [location=142..534] [gbkey=CDS]

ATGGCTGAGTACGGGACCCTCTGCAAGACCTGACCAACAACATCACCTTGAAGATCTAGAACAGCTCA  
AGTCGGCCTGCAAGGAAGACATCCCCAGCGAAAAGAGTGAGGAGATCACTACTGGCAGTGCCTGGTTTAG  
CTTCCTGGAGAGCCACAACAAGCTGGACAAAGACAACCTCTCCTACATTGAGCACATCTTTGAGATCTCC  
CGCCGTCTGACCTACTCACTATGGTGGTTGACTACAGAACCCGTGTGCTGAAGATCTCTGAGGAGGATG  
AGCTGGACACCAAGCTAACCCGTATCCCCAGTGCCAAGAAGTACAAAGACATTATCCGGCAGCCCTCTGA  
GGAAGAGATCATCAAATTGGCTCCCCACCGAAGAAGGCCTGA

>|cl|NM\_014389.3\_cds\_NP\_055204.4\_1 [gene=PELP1] [db\_xref=CCDS:CCDS58503.2] [protein=proline-,  
glutamic acid- and leucine-rich protein 1 isoform 1] [protein\_id=NP\_055204.4] [location=27..3419]  
[gbkey=CDS]

ATGGCGGCAGCCGTTCTGAGTGGGCCCTCTGCGGGCTCCGCGGCTGGGGTTCCTGGCGGGACCGGGGGTC  
TCTCGGCAGTGAGCTCGGGCCCGCGGCTCCGCCTGCTGCTGCTGGAGAGTGTTTCTGGTTTGCTGCAACC  
TCGAACGGGGTCTGCCGTTGCTCCGGTGCATCCCCAAACCGCTCGGCCCCACATTTGCCCGGGCTCATG  
TGCCTATTGCGGCTGCATGGGTGCGTGGGCGGGGCCAGAACCTTTCAGCTCTTGGGGCATTGGTGAGTC  
TCAGTAATGCACGTCTCAGTTCCATCAAACTCGGTTTGAGGGCCTGTGTCTGCTGTCCCTGCTGGTAGG

GGAGAGCCCCACAGAGCTATTCCAGCAGCACTGTGTGTCTTGGCTTCGGAGCATTACAGCAGGTGTTACAG  
ACCCAGGACCCGCTGCCACAATGGAGCTGGCCGTGGCTGTCCTGAGGGACCTCCTCCGATATGCAGCCC  
AGCTGCCTGCACTGTTCCGGGACATCTCCATGAACCACCTCCCTGGCCTTCTCACCTCCCTGCTGGGCCT  
CAGGCCAGAGTGTGAGCAGTCAGCATTGGAAGGAATGAAGGCTTGTATGACCTATTTCCCTCGGGCTTGT  
GGTTCTCTCAAAGGCAAGCTGGCCTCATTTTTCTGTCTAGGGTGGATGCCTTGAGCCCTCAGTCCAAC  
AGTTGGCCTGTGAGTGTTATTCCCGGCTGCCCTCTTAGGGGCTGGCTTTCCCAAGGCCTGAAGCACAC  
CGAGAGCTGGGAGCAGGAGCTACACAGTCTGCTGGCCTACTGCACACCCTGCTGGGGGCCCTGTACGAG  
GGAGCAGAGACTGCTCCTGTGCAGAAATGAAGGCCCTGGGGTGGAGATGCTGCTGTCCTCAGAAGATGGTG  
ATGCCCATGTCCTTCTCCAGCTTCGGCAGAGGTTTTCGGGACTGGCCCGCTGCCTAGGGCTCATGCTCAG  
CTCTGAGTTTGGAGCTCCCGTGTCCGTCCCTGTGCAGGAAATCCTGGATTTCATCTGCCGGACCCTCAGC  
GTCAGTAGCAAGAATATTAGCTTGCATGGAGATGGTCCCCTGCGGCTGCTGCTGCTGCCCTCTATCCACC  
TTGAGGCCTTGGACCTGCTGTCTGCACTCATCCTCGCGTGTGGAAGCCGGCTCTTGCGCTTTGGGATCCT  
GATCGGCCGCCTGCTTCCCCAGGTCCTCAATTCCTGGAGCATCGGTAGAGATTCCCTCTCTCCAGGCCAG  
GAGAGGCCTTACAGCACGGTTCGGACCAAGGTGTATGCGATATTAGAGCTGTGGGTGCAGGTTTGTGGGG  
CCTCGGCGGGAATGCTTCAGGGAGGAGCCTCTGGAGAGGCCCTGCTACCCACCTGCTCAGCGACATCTC  
CCCGCCAGCTGATGCCCTTAAGCTGCGTAGCCCGCGGGGAGCCCTGATGGGAGTTTGCAGACTGGGAAG  
CCTAGCGCCCCAAGAAGCTAAAGCTGGATGTGGGGGAAGCTATGGCCCCGCCAAGCCACCGGAAAGGGG  
ATAGCAATGCCAACAGCGACGTGTGTGCGGCTGCACTCAGAGGCCTCAGCCGGACCATCCTCATGTGTGG  
GCCTCTCATCAAGGAGGAGACTCACAGGAGACTGCATGACCTGGTCCTCCCCCTGGTCATGGGTGTACAG  
CAGGGTGAGGTCCTAGGCAGCTCCCGTACACGAGCTCCCGCTGCCGCGTGAACTCTACTGCCTGCTGC  
TGGCGCTGCTGCTGGCCCCGTCTCCTCGCTGCCACCTCCTTGCCTGTGCCCTGCAAGCCTTCTCCCT  
CGGCCAGCGAGAAGATAGCCTTGAGGTCTCCTCTTTCTGCTCAGAAGCACTGGTGACCTGTGCTGCTCTG  
ACCCACCCCGGGTTCTCCCTGCAGCCCATGGGCCCCACCTGCCCCACACCTGCTCCAGTTCCCCCTC  
CTGAGGCCCATCGCCCTTACAGGGCCCCACCGTTCCATCCTCCGGGCCCCATGCCCTCAGTGGGTCCAT  
GCCCTCAGCAGGCCCATGCCTTACGAGGCCCATGCCCTCAGCAGGCCCTGTGCCCTCGGCACGCCCT

GGACCTCCCACCACAGCCAACCACCTAGGCCTTTCTGTCCCAGGCCTAGTGTCTGTCCCTCCCCGGCTTC  
TTCCTGGCCCTGAGAACCACCGGGCAGGCTCAAATGAGGACCCCATCCTTGCCCCTAGTGGGACTCCCCC  
ACCTACTATACCCCCAGATGAAACTTTTGGGGGGAGAGTGCCCAGACCAGCCTTTGTCCACTATGACAAG  
GAGGAGGCATCTGATGTGGAGATCTCCTTGAAAAGTGA CTCTGATGACAGCGTGGTGATCGTGCCCGAGG  
GGCTTCCCCCCTGCCACCCCCACCACCTCAGGTGCCACACCACCCCTATAGCCCCACTGGGCCACC  
AACAGCCTCCCCTCCTGTGCCAGCGAAGGAGGAGCCTGAAGAACTTCCTGCAGCCCCAGGGCCTCTCCCG  
CCACCCCCACCTCCGCCGCCGCTGTTCTGGTCTGTGACGCTCCCTCCACCCAGTTGGTCCCTGAAG  
GGACTCCTGGTGGGGGAGGACCCCCAGCCCTGGAAGAGGATTTGACAGTTATTAATATCAACAGCAGTGA  
TGAAGAGGAGGAGGAAGAGGAAGAAGAGGAAGAAGAAGAGGAAGAAGAGGAAGAGGAGGAAGACTTT  
GAGGAAGAGGAAGAGGATGAAGAGGAATATTTGAAGAGGAAGAAGAGGAGGAAGAAGAGTTTGAGGAAG  
AATTTGAGGAAGAAGAAGGTGAGTTAGAGGAAGAAGAAGAAGAGGAGGATGAGGAGGAGGAAGAAGAACT  
GGAAGAGGTGGAAGACCTGGAGTTTGGCACAGCAGGAGGGGAGGTAGAAGAAGGTGCACCTCCACCCCCA  
ACCCTGCCTCCAGCTCTGCCTCCCCCTGAGTCTCCCCAAAGGTGCAGCCAGAACCCGAACCTGAACCCG  
GGCTGCTTTTGAAGTGGAGGAGCCAGGGACGGAGGAGGAGCGTGGGGCTGACACAGCTCCCACCTGGC  
CCCTGAAGCGCTCCCCTCCCAGGGAGAGGTGGAGAGGGAAGGGGAAAGCCCTGCGGCAGGGCCCCCTCCC  
CAGGAGCTTGTTGAAGAAGAGCCCTCTGCTCCCCCAACCCTGTTGGAAGAGGAGACTGAGGATGGGAGTG  
ACAAGGTGCAGCCCCCACCAGAGACACCTGCAGAAGAAGAGATGGAGACAGAGACAGAGGCCGAAGCTCT  
CCAGGAAAAGGAGCAGGATGACACAGCTGCCATGCTGGCCGACTTCATCGATTGTCCCCTGATGATGAG  
AAGCCACCACCTCCCACAGAGCCTGACTCCTAG

>|cl|NM\_004565.3\_cds\_NP\_004556.1\_1 [gene=PEX14] [db\_xref=CCDS:CCDS30582.1]  
[protein=peroxisomal membrane protein PEX14] [protein\_id=NP\_004556.1] [location=18..1151]  
[gbkey=CDS]

ATGGCGTCCTCGGAGCAGGCAGAGCAGCCGAGCCAGCCAAGCTCTACTCCAGGAAGTGAAAATGTGCTGC  
CTCGAGAGCCGCTGATTGCCACGGCAGTGAAGTTTCTACAGAATTCCCGGGTCCGCCAGAGCCCACTTGC  
AACCAGGAGAGCATTCTAAAGAAGAAAGGGCTGACAGATGAAGAGATTGATATGGCCTTCCAGCAGTCG  
GGCACTGCTGCCGATGAGCCTTCGTCCTTGGGCCCAGCCACACAGGTGGTTCCTGTCCAGCCCCCTCACC  
TCATATCTCAGCCATACAGTCCCGCAGGCTCCCGATGGCGAGATTACGGCGCCCTGGCCATCATCATGGC  
AGGCATTGCATTTGGCTTTCACCAGCTCTACAAGAAATACCTGCTCCCCCTCATCCTGGGCGGCCGAGAG  
GACAGAAAGCAGCTGGAGAGGATGGAGGCCGGTCTCTCTGAGCTGAGTGGCAGCGTGGCCAGACAGTGA  
CTCAGTTACAGACGACCCTCGCCTCCGTCCAGGAGCTGCTGATTCAGCAGCAGCAGAAGATCCAGGAGCT  
TGCCACGAGCTGGCCGCTGCCAAGGCCACCACATCCACCAACTGGATCCTGGAGTCCCAGAATATCAAC  
GAACTCAAGTCCGAAATTAACCTCTTCAAAGGGCTTCTTTTAAATCGGAGGCAGTTCCTCCATCCCCAT  
CAGCCCCGAAGATCCCCTCCTGGCAGATCCAGTCAAGTCACCGTCACCCTCCAGCCCTGCGGCCGTGAA  
CCACCACAGCAGCAGCGACATCTCACCTGTCAGCAACGAGTCCACGTCGTCCTCGCCTGGGAAGGAGGGC  
CACAGCCCCGAGGGCTCCACGGTCACCTACCACTTGCTGGGCCCCCAGGAGGAAGGCGAGGGGGTGGTGG  
ACGTCAAGGGCCAGGTGCGGATGGAGGTGCAAGGCGAGGAGGAGAAGAGGGAGGACAAGGAGGACGAGGA  
GGATGAGGAGGATGATGATGTGAGCCATGTGGACGAGGAGGACTGCCTGGGGGTGCAGAGGGAGGACCGC  
CGGGGCGGGGATGGGCAGATCAACGAGCAGGTGGAGAAGCTGCGGCGGCCCGAGGGCGCCAGCAACGAGA  
GTGAGCGGGACTAG

>|cl|NM\_003630.3\_cds\_NP\_003621.1\_1 [gene=PEX3] [db\_xref=CCDS:CCDS5199.1]  
[protein=peroxisomal biogenesis factor 3] [protein\_id=NP\_003621.1] [location=239..1360] [gbkey=CDS]

ATGCTGAGGTCTGTATGGAATTTTCTGAAACGCCACAAAAAGAAATGCATCTTCCTGGGCACGGTCCTTG  
GAGGAGTATATATTCTGGGGAAATATGGACAGAAGAAAATCAGAGAAATACAGGAAAGGGAGGCTGCAGA  
ATACATTGCCCAAGCACGACGACAATATCATTTTGAAAGTAACCAGAGGACTTGCAATATGACAGTGCTG

TCCATGCTTCCAACACTGAGAGAGGCCTTAATGCAGCAACTGAATTCCGAGAGCCTCACAGCTCTGCTAA  
AAAACAGGCCTTCAAACAAGCTAGAAATATGGGAGGATCTGAAGATAATAAGTTTCACAAGAAGTACTGT  
GGCTGTATACAGTACCTGTATGCTGGTTGTTCTTTGCGGGTCCAGTTAAACATAATTGGTGGATATATT  
TACCTGGATAATGCAGCAGTTGGCAAAAATGGCACTACAATTCTTGCTCCCCCAGATGTCCAACAGCAGT  
ATTTATCAAGTATTCAGCACCTACTTGGAGATGGCCTGACAGAATTGATCACTGTCATTAAACAAGCTGT  
GCAGAAGGTTTTAGGAAGTGTCTCTTAAACATTCTTTGTCCCTTTGGACTTGGAGCAAAAACATAAAA  
GAAATCAGAAATCTCGTTGAGCAGCATAAGTCTTCTTCTTGGATTAATAAAGATGGATCCAAACCTTTAT  
TATGCCATTATATGATGCCAGATGAAGAACTCCATTAGCAGTGCAGGCCTGTGGACTTTCTCCTCGAGA  
CATTACCACTATTAACTTCTCAATGAACTAGAGACATGTTGGAAAGCCCAGATTTTAGTACAGTTTTG  
AATACCTGTTTAAACCGAGGTTTTAGTAGACTTCTAGACAATATGGCTGAGTTCTTTGACCTACTGAAC  
AGGACCTGCAACATGGTAACTCTATGAATAGTCTTCCAGTGTGAGCCTGCCTTTAGCTAAGATAATTCC  
AATAGTAAACGGACAGATCCATTGAGTTTGCAGTGAAACACCTAGTCATTTTGTTCAGGATCTGTTGACA  
ATGGAGCAAGTGAAAGACTTTGCTGCTAATGTGTATGAAGCTTTTAGTACCCCTCAGCAACTGGAGAAAT  
GA

>|cl|NM\_002647.4\_cds\_NP\_002638.2\_1 [gene=PIK3C3] [db\_xref=CCDS:CCDS11920.1]  
[protein=phosphatidylinositol 3-kinase catalytic subunit type 3 isoform 1] [protein\_id=NP\_002638.2]  
[location=59..2722] [gbkey=CDS]

ATGGGGGAAGCAGAGAAGTTTCACTACATCTATAGTTGTGACCTGGATATCAACGTCCAGCTTAAGATAG  
GAAGCTTGGAAGGGAAGAGAGAGACAAAAGAGTTATAAAGCTGTCCTGGAAGACCCAATGTTGAAGTTCTC  
AGGACTATATCAAGAGACATGCTCTGATCTTTATGTTACTTGTCAAGTTTTTGCAGAAGGGAAGCCTTTG  
GCCTTGCCAGTGAGAACATCCTACAAAGCATTTAGTACAAGATGGAAGTGAATGAATGGCTGAAACTAC  
CAGTAAATACCCTGACCTGCCCAGGAATGCCCAAGTGGCCCTCACCATATGGGATGTGTATGGTCCCGG

AAAAGCAGTGCCTGTAGGAGGAACAACGGTTTCGCTCTTTGGAAAATACGGCATGTTTCGCCAAGGGATG  
CATGACTTGAAAGTCTGGCCTAATGTAGAAGCAGATGGATCAGAACCCACAAAACTCCTGGCAGAACAA  
GTAGCACTCTCTCAGAAGATCAGATGAGCCGTCTTGCCAAGCTCACCAAAGCTCATCGACAAGGACACAT  
GGTGAAAGTAGATTGGCTGGATAGATTGACATTTAGAGAAATAGAAATGATAAATGAGAGTGAAAAACGA  
AGTTCTAATTTTCATGTACCTGATGGTTGAATTTTCGATGTGTCAAGTGTGATGATAAGGAATATGGTATTG  
TTTATTATGAAAAGGACGGTGATGAATCATCTCCAATTTTAACAAGTTTTGAATTAGTGAAAGTTCCTGA  
CCCCCAGATGTCTATGGAGAATTTAGTTGAGAGCAAACACCACAAGCTTGCCCGGAGTTTAAGAAGTGGA  
CCTTCTGACCACGATCTGAAACCCAATGCTGCCACGAGAGATCAGTTAAATATTATTGTGAGTTATCCAC  
CAACCAAGCAACTTACATATGAAGAACAAGATCTTGTTTGAAGTTTAGATATTATCTTACGAATCAAGA  
AAAAGCCTTGACAAAATTCTTGAAATGTGTTAATTGGGATCTACCTCAAGAGGCCAAACAGGCCTTGGA  
CTTCTGGGAAAATGGAAGCCGATGGATGTAGAGGACTCCTTGGAGCTGTTATCCTCTCATTACACCAACC  
CAACTGTGAGGCGTTATGCTGTTGCCCGTTGCGACAGGCCGATGATGAGGATTTGTTGATGTACCTATT  
ACAATTGGTCCAGGCTCTCAAATATGAAAATTTTGATGATATAAAGAATGGATTGGAACCTACCAAGAAG  
GATAGTCAGAGTTCAGTGTGAGAAAATGTGTCAAATTCTGGAATAAATTCTGCAGAAATAGATAGCTCCC  
AAATTATAACCAGCCCCCTTCCTTCAGTCTCTTCACCTCCTCCTGCATCAAAAACAAAAGAAGTTCCAGA  
TGGCGAAAATCTGGAACAAGATCTCTGTACCTTCTTGATATCGAGAGCCTGCAAAAACCTCAACACTGGCT  
AATTATTTATACTGGTATGTGATAGTGGAATGTGAAGATCAAGATACTCAGCAGAGAGATCCAAAGACCC  
ATGAGATGTACTTGAACGTAATGAGAAGATTAGCCAAGCATTGTTGAAGGGTGATAAGTCTGTCAGAGT  
TATGCGTTCTTTGCTGGCTGCACAACAGACATTTGTAGATCGGTTGGTGCATCTAATGAAGGCAGTACAA  
CGCGAAAGTGGAATCGTAAGAAAAAGAATGAGAGACTACAGGCATTGCTTGGAGATAATGAAAAGATGA  
ATTTGTCAGATGTGGAACCTTATCCCGTTGCCTTTAGAACCCCAAGTGAAAATTAGAGGAATAATTCCGGA  
AACAGCTACACTGTTTAAAAGTGCCCTTATGCCTGCACAGTTGTTTTTTAAGACGGAAGATGGAGGCAAA  
TATCCAGTTATATTTAAGCATGGAGATGATTTACGTCAAGATCAACTTATTCTTCAAATCATTTCACTCA  
TGGACAAGCTGTTACGGAAAGAAAATCTGGACTTGAAATTGACACCTTATAAGGTGTTAGCCACCAGTAC  
AAAACATGGCTTCATGCAGTTTATCCAGTCAGTTCCTGTGGCTGAAGTTCTTGATACAGAGGGAAGCATT

CAGAACTTTTTAGAAAAATATGCACCAAGTGAGAATGGGCCAAATGGGATTAGTGCTGAGGTCATGGACA  
CTTACGTAAAAAGCTGTGCTGGATATTGCGTGATCACCTATATACTTGGAGTTGGAGACAGGCACCTGGA  
TAACCTTTTGCTAACAAAAACAGGCAAACCTTCCACATAGACTTTGGATATATTTTGGGTCGGGATCCA  
AAGCCTCTCCTCCACCAATGAAGCTGAATAAAGAAATGGTAGAAGGAATGGGGGGCACACAGAGTGAGC  
AGTACCAAGAGTTCCGTAAACAGTGTTACACGGCTTTCCTCCACCTGCGAAGGTATTCTAATCTGATTTT  
GAACTTGTTTTCTTGATGGTTGATGCAAACATTCCAGATATTGCACTTGAACCAGATAAACTGTGAAA  
AAGGTTCAGGATAAATTCCGCTTAGACCTGTCGGATGAAGAGGCTGTGCATTACATGCAGAGTCTGATTG  
ATGAGAGTGTCCATGCTCTTTTTGCTGCAGTGGTGGAACAGATTCACAAGTTTGCCAGTACTGGAGAAA  
ATGA

>|cl|NM\_014602.3\_cds\_NP\_055417.1\_1 [gene=PIK3R4] [db\_xref=CCDS:CCDS3067.1]  
[protein=phosphoinositide 3-kinase regulatory subunit 4] [protein\_id=NP\_055417.1]  
[location=559..4635] [gbkey=CDS]

ATGGGAAATCAGCTTGCTGGCATTGCTCCCTCCCAGATCCTTTCTGTAGAGAGTTATTTTTCAGATATTC  
ATGACTTTGAATATGATAAAAGCCTGGGGAGTACTCGGTTTTTTAAAGTTGCTCGAGCCAAGCACCGAGA  
AGGCCTGGTCGTTGTGAAGGTTTTTGCAATTCAGGATCCCACATTGCCTTTAACCAGCTATAAAACAAGAG  
CTGGAGGAACTGAAAATCAGGCTTAATTCTGCACAGAATTGTCTACCTTTCCAGAAAGCATCAGAAAAAG  
CATCTGAGAAAGCAGCTATGCTCTTTAGGCAGTATGTGCGAGACAATCTCTATGATCGCATCAGTACCCG  
TCCATTCTTGAATAACATTGAGAAGCGCTGGATTGCTTTCAGATCCTGACAGCTGTGGACCAAGCACAC  
AAATCTGGAGTTCGTCATGGGGACATCAAGACTGAGAATGTGATGGTCACCAGTTGGAATTGGGTTCTTC  
TAACTGATTTTGCCAGTTTTAAGCCCACTTATCTTCCAGAAGACAACCCGGCAGATTTCAATTATTTCTT  
TGACACATCACGGAGGAGAACTTGCTATATTGCTCCTGAACGTTTTGTTGATGGTGGGATGTTTGCCACT  
GAGTTAGAATATATGAGAGATCCTTCAACTCCGCTTGTAGACTTAAATAGCAATCAGAGAACAAGAGGAG

AGTTGAAGAGAGCAATGGACATCTTTTCAGCAGGTTGTGTGATAGCTGAGCTTTTTACAGAAGGTGTACC  
ATTATTTGATCTCTCTCAACTTTTGGCTTATAGAAATGGACATTTTTTCCCTGAACAAGTGCTAAATAAA  
ATTGAAGATCACAGTATCAGAGAATTGGTAACTCAGATGATTCACCGTGAGCCAGATAAACGTTTAGAGG  
CAGAAGATTACTTAAAACAGCAGCGTGGCAATGCCTTTCCTGAAATATTTTACACTTTTCTTCAGCCCTA  
CATGGCCCAGTTTGCCAAGGAAACGTTTCTTCTGCAGATGAGCGTATTCTGGTTATACGGAAGGATTTG  
GGCAACATTATTCACAATCTCTGTGGACATGATCTGCCAGAAAAAGCCGAAGGAGAGCCTAAGGAAAATG  
GGCTGGTTATCTTGGTATCTGTTATAACATCCTGCCTACAGACCCTTAAATACTGTGATTCCAACTAGC  
TGCTTTGGAAGTATTCTTCATTTGGCTCCAAGATTAAGTGTTGAAATCCTTTTGGATCGTATTACTCCA  
TATCTTTTGCATTTAGCAATGACTCTGTTCTAGGGTGAGGGCTGAAGCCTTGAGGACGTTGACCAAAG  
TTCTTGCTCTCGTCAAAGAGGTTCTCGTAATGATATCAATATTTATCCGGAATACATTCTGCCAGGCAT  
AGCCCCTTAGCCCAAGATGATGCTACTATCGTTAGACTAGCCTATGCTGAAAACATAGCTCTGCTGGCA  
GAAACAGCTCTGAGATTCCTGGAATTAGTACAGTTAAAAAATCTTAATATGGAAAATGACCCCAATAATG  
AAGAAATAGATGAGGTTACACATCCAAATGGAAATTATGACACAGAGCTCCAAGCCTTACATGAAATGGT  
CCAGCAGAAAGTTGTTACTTTGCTAAGTGACCCTGAAAATATTGTAAAACAAACCTTGATGGAAAATGGA  
ATAACACGGCTGTGTGTATTCTTTGGACGTCAGAAAGCCAACGATGTTTTGTTGTCCACATGATTACTT  
TCCTAAATGATAAGAATGATTGGCATCTACGTGGAGCATTTTTTGATAGTATAGTTGGTGTGCTGCCTA  
TGTTGGCTGGCAAAGCTCCTCAATTCTCAAGCCTCTGCTGCAACAAGGTCTTAGTGATGCTGAGGAATTT  
GTCATTGTGAAAGCTCTTTATGCCCTTACTTGTATGTGCCAGTTAGGACTGCTACAAAAACCCATGTTT  
ACGAATTTGCCAGTGATATTGCCCCCTTCTGTGTATCCCAATTTATGGATACGTTATGGTGCCGTGGG  
ATTTATCACAGTGGTAGCTCGTCAAATAAGTACAGCTGATGTCTACTGTAAACTGATGCCTTATCTTGAC  
CCATATATTACCCAACCAATAATACAGATTGAAAGAAAACCTTGTCTGCTCAGTGTTTTAAAGGAACCAG  
TAAGTCGTTCTATATTTGATTATGCTTTGAGGTCTAAAGATATTACTAGCTTGTTTCAGACATCTTCACAT  
GCGTCAGAAGAAACGAAATGGTTCTTCCCGACTGCCCTCCGCCAGAGGATCCTGCCATAGCACAGCTT  
CTGAAGAAGTTGCTCTCACAGGGAATGACAGAGGAAGAGGAAGACAACTTCTGGCACTGAAAGACTTCA  
TGATGAAATCTAATAAAGCAAAGGCCAATATAGTGGACCAGAGCCATCTTCATGATAGTAGTCAGAAAGG

TGTAATTGACTTGGCAGCTTTAGGCATAACTGGGAGACAAGTTGATCTTGTTAAAACCAAACAAGAACCA  
GATGACAAACGGGCCAGAAAACATGTAAAACAAGACTCAAATGTAAATGAAGAATGGAAAAGCATGTTTG  
GGTCACTGGACCCACCAAACATGCCACAGGCCCTACCTAAAGGGAGTGATCAGGAGGTGATTGAGACTGG  
GAAACCTCCTCGTTCGAGTCCTCTGCTGGCATTGTGTCCCTTTGTCAACTTCTTCACAGGTTCCAGAA  
GTGACAACTGTCCAAAATAAAAAACCAGTAATACCGGTTTTAAGTAGTACAATCTTACCATCCACCTATC  
AGATTGGAATTACAACCTGTAAAACCTGAACTTCAGCAACTCATCCAGCAAAAAGCGGGAGCAGTGCAATGC  
TGAGAGAATAGCTAAGCAGATGATGGAAAATGCTGAATGGGAGAGTAAACCACCACCACCTGGATGGCGT  
CCTAAAGGGCTGTTAGTTGCCCATCTTCATGAGCATAAATCTGCTGTGAATCGAATTAGAGTCTCTGATG  
AACACTCACTTTTTGCAACATGTTCAAATGATGGCACAGTGAAAACTGGAACAGTCAAAAGATGGAGGG  
GAAGACCACCACTACCAGATCTATTCTTACATACAGCCGAATTGGAGGACGAGTCAAGACGCTCACATTC  
TGCCAAGGCTCCCACTATTTAGCCATAGCATCTGATAATGGTGCTGTCCAGCTTCTTGGAATTGAGGCTT  
CTAAGCTGCCCAAGTCTCCTAAAAATCCATCCTCTACAAAGCAGAATTCTAGATCAGAAGGAGGACGGTTG  
TGTTGTGGATATGCATCACTTCAACTCTGGAGCACAGTCTGTTCTTGCCTATGCCACTGTGAATGGCTCT  
CTGGTTGGCTGGGACCTTAGGTCTTCAAGCAATGCGTGGACTTTAAAGCATGATTTAAAGTCGGGCCTCA  
TCACTTCCTTTGCTGTGGACATCCACCAATGCTGGCTCTGCATTGGTACAAGCAGTGGTACCATGGCTTG  
TTGGGACATGAGGTTCCAGTTGCCAATTTCAAGTCACTGTCATCCTTCCAGGGCTCGAATCAGACGCCTC  
TCAATGCACCCTCTGTATCAGTCCTGGGTGATTGCAGCTGTTTCAGGGCAACAACGAAGTGTCATGTGGG  
ACATGGAGACTGGTGACAGAAGATTTACTCTCTGGGCCAGCAGTGCACCACCACTTTCTGAATTACAGCC  
TTCTCCTCATAGCGTCCATGGTATCTACTGTAGTCCTGCAGATGGAAATCCTATCCTACTAACAGCTGGC  
TCAGATATGAAAATAAGGTTTTGGGACTTGGCTTACCCAGAAAGGTCCTATGTTGTTGCAGGAAGTACTA  
GTTCCCATCTGTGTCCTACTACAGGAAAATAATTGAAGGCACTGAAGTTGTCCAGGAAATTCAGAATAA  
GCAGAAAGTAGGACCAAGTGATGACACCCCTCGAAGGGGCCAGAGTCCCTGCCCGTGGGACATCATGAC  
ATCATCACTGATGTCGCCACATTCCAGACCACACAGGGCTTCATCGTAACTGCTTCTAGAGATGGGATTG  
TGAAGGTGTGGAAATAA

>|cl|NM\_032409.3\_cds\_NP\_115785.1\_1 [gene=PINK1] [db\_xref=CCDS:CCDS211.1]  
[protein=serine/threonine-protein kinase PINK1, mitochondrial precursor] [protein\_id=NP\_115785.1]  
[location=92..1837] [gbkey=CDS]

ATGGCGGTGCGACAGGCGCTGGGCCGCGGCCTGCAGCTGGGTCGAGCGCTGCTGCTGCGCTTCACGGGCA  
AGCCCGGCCGGGCCTACGGCTTGGGGCGGCCGGGCCGGCGGCGGGCTGTGTCCGCGGGGAGCGTCCAGG  
CTGGGCCGCGAGACCGGGCGCGGAGCCTCGCAGGGTCGGGCTCGGGCTCCCTAACCGTCTCCGCTTCTTC  
CGCCAGTCGGTGGCCGGGCTGGCGGCGCGGTTGCAGCGGCAGTTCGTGGTGCGGGCCTGGGGCTGCGCGG  
GCCCTTGCGGCCGGGCAGTCTTTCTGGCCTTCGGGCTAGGGCTGGGCCTCATCGAGGAAAAACAGGCGGA  
GAGCCGGCGGGCGGTCTCGGCCTGTCAGGAGATCCAGGCAATTTTACCCAGAAAAGCAAGCCGGGGCCT  
GACCCGTTGGACACGAGACGCTTGCAGGGCTTTCGGCTGGAGGAGTATCTGATAGGGCAGTCCATTGGTA  
AGGGCTGCAGTGCTGCTGTGTATGAAGCCACCATGCCTACATTGCCCCAGAACCTGGAGGTGACAAAGAG  
CACCGGGTTGCTTCCAGGGAGAGGCCAGGTACCAAGTGCACAGGAGAAGGGCAGGAGCGAGCTCCGGGG  
GCCCTGCCTTCCCCTTGCCATCAAGATGATGTGGAACATCTCGGCAGGTTCTCCAGCGAAGCCATCT  
TGAACACAATGAGCCAGGAGCTGGTCCCAGCGAGCCGAGTGGCCTTGGCTGGGGAGTATGGAGCAGTCAC  
TTACAGAAAATCCAAGAGAGGTCCCAAGCAACTAGCCCCTCACCCCAACATCATCCGGGTTCTCCGCGCC  
TTCACCTCTTCCGTGCCGCTGCTGCCAGGGGCCCTGGTCGACTACCCTGATGTGCTGCCCTCACGCCTCC  
ACCCTGAAGGCCTGGGCCATGGCCGGACGCTGTTCTCGTTATGAAGAACTATCCCTGTACCCTGCGCCA  
GTACCTTTGTGTGAACACACCCAGCCCCCGCCTCGCCGCCATGATGCTGCTGCAGCTGCTGGAAGGCGTG  
GACCATCTGGTTCAACAGGGCATCGCGCACAGAGACCTGAAATCCGACAACATCCTTGTGGAGCTGGACC  
CAGACGGCTGCCCCTGGCTGGTGATCGCAGATTTTGGCTGCTGCCTGGCTGATGAGAGCATCGGCCTGCA  
GTTGCCCTTCAGCAGCTGGTACGTGGATCGGGGCGGAAACGGCTGTCTGATGGCCCCAGAGGTGTCCACG  
GCCCCTCTGGCCCCAGGGCAGTGATTGACTACAGCAAGGCTGATGCCTGGGCAGTGGGAGCCATCGCCT  
ATGAAATCTTCGGGCTTGTCAATCCCTTCTACGGCCAGGGCAAGGCCACCTTGAAAGCCGCAGCTACCA

AGAGGCTCAGCTACCTGCACTGCCCAGTCAGTGCCTCCAGACGTGAGACAGTTGGTGAGGGCACTGCTC  
CAGCGAGAGGCCAGCAAGAGACCATCTGCCCAGTAGCCGCAAATGTGCTTCATCTAAGCCTCTGGGGTG  
AACATATTCTAGCCCTGAAGAATCTGAAGTTAGACAAGATGGTTGGCTGGCTCCTCCAACAATCGGCCGC  
CACTTTGTTGGCCAACAGGCTCACAGAGAAGTGTTGTGTGGAAACAAAAATGAAGATGCTCTTTCTGGCT  
AACCTGGAGTGTGAAACGCTCTGCCAGGCAGCCCTCCTCCTCTGCTCATGGAGGGCAGCCCTGTGA

>|cl|NM\_014330.5\_cds\_NP\_055145.3\_1 [gene=PPP1R15A] [db\_xref=CCDS:CCDS12738.1]  
[protein=protein phosphatase 1 regulatory subunit 15A] [protein\_id=NP\_055145.3] [location=241..2265]  
[gbkey=CDS]

ATGGCCCCAGGCCAAGCACCCCATCAGGCTACCCCGTGGAGGGATGCCACCCCTTCTTCCTCCTGTCCC  
CAGTGATGGGCCTCCTCAGCCGCGCCTGGAGCCGCTGAGGGGCCTGGGACCTCTAGAGCCCTGGCTGGT  
GGAAGCAGTAAAAGGAGCAGCTCTGGTAGAAGCTGGCCTGGAGGGAGAAGCTAGGACTCCTCTGGCAATC  
CCCCATACCCCTTGGGGCAGACGCCCTGAAGAGGAGGCTGAAGACAGTGGAGGCCCTGGAGAGGACAGAG  
AAACACTGGGGCTGAAAACCAGCAGTTCCTTCCTGAAGCCTGGGGACTTTTGGATGATGATGATGGCAT  
GTATGGTGAGCGAGAGGCAACCAGTGTCCCTAGAGGGCAGGGAAGTCAATTTGCAGATGGCCAGCGTGCT  
CCCCTGTCTCCAGCCTTCTGATAAGGACACTGCAAGGTTCTGATAAGAACCCAGGGGAGGAGAAAGCCG  
AGGAAGAGGGAGTTGCTGAAGAGGAGGGAGTTAACAAGTTCTTATCCACCATCACACCGGGAGTGTTG  
TCCAGCCGTGGAGGAGGAGGACGATGAAGAAGCTGTAAAGAAAGAAGCTCACAGAACCTCTACTTCTGCC  
TTGTCTCCAGGATCCAAGCCCAGCACTTGGGTGTCTTGCCAGGGGAGGAAGAGAATCAAGCCACGGAGG  
ATAAAGAAGCAGAAAGAAGTAAAGGAGCCAGGAAGACCTCCGTGTCCCCCGATCTTCAGGCTCCGACCC  
CAGGTCCTGGGAGTATCGTTCAGGAGAGGCGTCCGAGGAGAAGGAGGAAAAGGCACACAAAGAACTGGG  
AAAGGAGAAGCTGCCCCAGGGCCGCAATCCTCAGCCCCAGCCCAGAGGCCCCAGCTCAAGTCTGGTGGT  
GCCAACCAGTGATGAAGAGGAGGGTGAGGTCAAGGCTTTGGGGGCAGCTGAGAAGGATGGAGAAGCTGA

GTGTCCTCCCTGCATCCCCCACCAAGTGCCTTCTGAAGGCCTGGGTGTATTGGCCAGGAGAGGACACA  
GAGGAAGAGGAAGATGAGGAAGAAGATGAGGACAGTGACTCTGGATCAGATGAGGAAGAGGGAGAAGCTG  
AGGCTTCTCTTCCACTCCTGCTACAGGTGTCTTCTTGAAGTCCTGGGTCTATCAGCCAGGAGAGGACAC  
AGAGGAGGAGGAAGATGAGGACAGTGATACAGGATCAGCCGAGGATGAAAGAGAAGCTGAGACTTCTGCT  
TCCACACCCCCTGCAAGTGCTTTCTTGAAGGCCTGGGTGTATCGGCCAGGAGAGGACACGGAGGAGGAGG  
AAGATGAGGATGTGGATAGTGAGGATAAGGAAGATGATTCAGAAGCAGCCTTGGGAGAAGCTGAGTCAGA  
CCCACATCCCTCCCACCCGGACCAGAGGGGCCACTTCAGGGGCTGGGGATATCGACCTGGAAAAGAGACA  
GAGGAAGAGGAAGCTGCTGAGGACTGGGGAGAAGCTGAGCCCTGCCCCTCCGAGTGGCCATCTATGTAC  
CTGGAGAGAAGCCACCGCCTCCCTGGGCTCCTCCTAGGCTGCCCCTCCGACTGCAAAGGCGGCTCAAGCG  
CCCAGAAACCCCTACTCATGATCCGGACCCTGAGACTCCCCTAAAGGCCAGAAAGGTGCGCTTCTCCGAG  
AAGGTCACTGTCCATTTCTGGCTGTCTGGGCAGGGCCGGCCAGGCCGCCCAGGGCCCCCTGGGAGC  
AGCTTGCTCGGGATCGCAGCCGCTTCGCACGCCGCATACCCAGGCCAGGAGGAGCTGAGCCCCTGCCT  
CACCCCTGCTGCCCAGGCCAGAGCCTGGGCACGCCTCAGGAACCCACCTTTAGCCCCATCCCTGCCCTC  
ACCCAGACCTTGCCCTCCTCTGTCCCTTCGTCCCCAGTCCAGACCACGCCCTTGAGCCAAGCTGTGG  
CCACACCTTCCCGCTCGTCTGCTGCTGCAGCGGCTGCCCTGGACCTCAGTGGGAGGCGTGGCTGA

>|cl|NM\_006253.5\_cds\_NP\_006244.2\_1 [gene=PRKAB1] [db\_xref=CCDS:CCDS9191.1] [protein=5'-AMP-  
activated protein kinase subunit beta-1] [protein\_id=NP\_006244.2] [location=113..925] [gbkey=CDS]

ATGGGCAATACCAGCAGTGAGCGCGCCGCTGGAGCGGCATGGTGGCCATAAGACGCCCCGGAGGGACA  
GCTCGGGGGGCACCAAGGACGGGGACAGGCCCAAGATCCTGATGGACAGCCCCGAAGACGCCGACCTCTT  
CCACTCCGAGGAAATCAAGGCACCAGAGAAGGAGGAATTCTGGCCTGGCAGCATGATCTGGAAGTGAAT  
GATAAAGCTCCCGCCCAGGCTCGGCCAACGGTGTTCGATGGACGGGGGGCGGAAAGGAAGTTTACTTAT  
CTGGGTCTTCAACAAGTGGAGTAACTTCCCCTCACCAGAAGCCACAATAACTTTGTAGCCATCCTGGA

TCTGCCGGAAGGAGAGCATCAGTACAAGTTCTTTGTGGATGGTCAGTGGACGCACGACCCTCCGAGCCC  
ATAGTAACCAGCCAGCTTGGCACAGTTAACAACATCATTCAAGTGAAGAAAAGTACTTTGAAGTATTTG  
ATGCTTTAATGGTGGATTCCCAAAAGTGCTCCGATGTGTCTGAGCTGTCCAGTTCTCCCCAGGACCCTA  
CCATCAGGAGCCCTACGTCTGCAAACCCGAAGAGCGCTTTCGGGCACCCCCTATTCTCCCCCACATCTC  
CTCCAGGTCATCCTGAACAAGGACACGGGGATTTCTGTGATCCAGCTTTGCTTCCTGAGCCCAATCACG  
TCATGCTGAACCACCTATACGCGCTGTCTATCAAGGATGGAGTGATGGTGCTCAGCGCAACCCACCGGTA  
CAAGAAGAAGTACGTACCCACCTTGTTATACAAGCCCATATGA

>|cl|NM\_001276289.2\_cds\_NP\_001263218.1\_1 [gene=PRKAR1A] [db\_xref=CCDS:CCDS11678.1]  
[protein=cAMP-dependent protein kinase type I-alpha regulatory subunit isoform a]  
[protein\_id=NP\_001263218.1] [location=259..1404] [gbkey=CDS]

ATGGAGTCTGGCAGTACCGCCGCCAGTGAGGAGGCACGCAGCCTTCGAGAATGTGAGCTCTACGTCCAGA  
AGCATAACATTCAAGCGCTGCTCAAAGATTCTATTGTGCAGTTGTGCACTGCTCGACCTGAGAGACCCAT  
GGCATTCTCAGGGAATACTTTGAGAGGTTGGAGAAGGAGGAGGCCAAAACAGATTCAGAATCTGCAGAAA  
GCAGGCACTCGTACAGACTCAAGGGAGGATGAGATTTCTCCTCCTCCACCCAACCCAGTGGTTAAAGGTA  
GGAGGCGACGAGGTGCTATCAGCGCTGAGGTCTACACGGAGGAAGATGCGGCATCCTATGTTAGAAAGGT  
TATACCAAAGATTACAAGACAATGGCCGCTTTAGCCAAAGCCATTGAAAAGAATGTGCTGTTTTACAT  
CTTGATGATAATGAGAGAAGTGATATTTTTGATGCCATGTTTTCGGTCTCCTTTATCGCAGGAGAGACTG  
TGATTCAGCAAGGTGATGAAGGGGATAACTTCTATGTGATTGATCAAGGAGAGACGGATGTCTATGTTAA  
CAATGAATGGGCAACCAGTGTTGGGGAAGGAGGGAGCTTTGGAGAACTTGCTTTGATTTATGGAACACCG  
AGAGCAGCCACTGTCAAAGCAAAGACAAATGTGAAATTGTGGGGCATCGACCGAGACAGCTATAGAAGAA  
TCCTCATGGGAAGCACACTGAGAAAAGCGGAAGATGTATGAGGAATTCCTTAGTAAAGTCTCTATTTAGA  
GTCTCTGGACAAGTGGGAACGTCTTACGGTAGCTGATGCATTGGAACCAAGTGCAGTTTGAAGATGGGCAG

AAGATTGTGGTGCAGGGAGAACCAGGGGATGAGTTCTTCATTATTTAGAGGGGTCAGCTGCTGTGCTAC  
AACGTCGGTCAGAAAATGAAGAGTTTGTGAAGTGGAAGATTGGGGCCTTCTGATTATTTGGTGAAAT  
TGCACTACTGATGAATCGTCCTCGTGCTGCCACAGTTGTTGCTCGTGGCCCCTTGAAGTGCGTTAAGCTG  
GACCGACCTAGATTTGAACGTGTTCTTGGCCCATGCTCAGACATCCTCAAACGAAACATCCAGCAGTACA  
ACAGTTTTGTGCTCACTGTCTGTCTGA

>|cl|NM\_001316327.2\_cds\_NP\_001303256.1\_1 [gene=PRKCD] [db\_xref=CCDS:CCDS2870.1]  
[protein=protein kinase C delta type isoform c] [protein\_id=NP\_001303256.1] [location=201..2231]  
[gbkey=CDS]

ATGGCGCCGTTCTGCGCATCGCCTTCAACTCCTATGAGCTGGGCTCCCTGCAGGCCGAGGACGAGGCGA  
ACCAGCCCTTCTGTGCCGTGAAGATGAAGGAGGCGCTCAGCACAGAGCGTGGGAAAACACTGGTGAGAA  
GAAGCCGACCATGTATCCTGAGTGGAAGTCGACGTTGATGCCACATCTATGAGGGGCGCGTCATCCAG  
ATTGTGCTAATGCGGGCAGCAGAGGAGCCAGTGTCTGAGGTGACCGTGGGTGTGTCGGTGCTGGCCGAGC  
GCTGCAAGAAGAACAATGGCAAGGCTGAGTTCTGGCTGGACCTGCAGCCTCAGGCCAAGGTGTTGATGTC  
TGTTCAGTATTTCTGGAGGACGTGGATTGCAAACAGTCTATGCGCAGTGAGGACGAGGCCAAGTTCCCA  
ACGATGAACCGCCGCGGAGCCATCAAACAGGCCAAAATCCACTACATCAAGAACCATGAGTTTATCGCCA  
CCTTCTTTGGGCAACCCACCTTCTGTTCTGTGTGCAAAGACTTTGTCTGGGGCCTCAACAAGCAAGGCTA  
CAAATGCAGGCAATGTAACGCTGCCATCCACAAGAAATGCATCGACAAGATCATCGGCAGATGCACTGGC  
ACCGCGGCCAACAGCCGGGACACTATATTCCAGAAAGAACGCTTCAACATCGACATGCCGCACCGCTTCA  
AGGTTCACAACTACATGAGCCCCACCTTCTGTGACCACTGCGGCAGCCTGCTCTGGGGACTGGTGAAGCA  
GGGATTAAAGTGTGAAGACTGCGGCATGAATGTGCACCATAAATGCCGGGAGAAGGTGGCCAACCTCTGC  
GGCATCAACCAGAAGCTTTTGGCTGAGGCCTTGAACCAAGTCACCCAGAGAGCCTCCCGGAGATCAGACT  
CAGCCTCCTCAGAGCCTGTTGGGATATATCAGGGTTTCGAGAAGAAGACCGGAGTTGCTGGGGAGGACAT

GCAAGACAACAGTGGGACCTACGGCAAGATCTGGGAGGGCAGCAGCAAGTGCAACATCAACAACCTTCATC  
TTCCACAAGGTCCTGGGCAAAGGCAGCTTCGGGAAGGTGCTGCTTGGAGAGCTGAAGGGCAGAGGAGAGT  
ACTTTGCCATCAAGGCCCTCAAGAAGGATGTGGTCTGATCGACGACGACGTGGAGTGCACCATGGTTGA  
GAAGCGGGTGCTGACACTTGCCGAGAGAATCCCTTTCTACCCACCTCATCTGCACCTTCAGACCAAG  
GACCACCTGTTCTTTGTGATGGAGTTCCTCAACGGGGGGGACCTGATGTACCACATCCAGGACAAAGGCC  
GCTTTGAACTCTACCGTGCCACGTTTTATGCCGCTGAGATAATGTGTGGACTGCAGTTTCTACACAGCAA  
GGGCATCATTTACAGGGACCTCAAACCTGGACAATGTGCTGCTGGACCGGGATGGCCACATCAAGATTGCC  
GACTTTGGGATGTGCAAAGAGAACATATTCGGGGAGAGCCGGGCCAGCACCTTCTGCGGCACCCCTGACT  
ATATCGCCCCTGAGATCCTACAGGGCCTGAAGTACACATTCTCTGTGGACTGGTGGTCTTTCGGGGTCCT  
TCTGTACGAGATGCTCATTGGCCAGTCCCCCTTCATGGTGATGATGAGGATGAACTCTTCGAGTCCATC  
CGTGTGGACACGCCACATTATCCCCGCTGGATCACCAAGGAGTCCAAGGACATCCTGGAGAAGCTCTTTG  
AAAGGGAACCAACCAAGAGGCTGGGAGTGACCGGAAACATCAAAATCCACCCCTTCTTCAAGACCATAAA  
CTGGACTCTGCTGGAAAAGCGGAGGTTGGAGCCACCTTTCAGGCCCAAAGTGAAGTCACCCAGAGACTAC  
AGTAACTTTGACCAGGAGTTCCTGAACGAGAAGGCGCGCCTCTCCTACAGCGACAAGAACCTCATCGACT  
CCATGGACCAGTCTGCATTGCTGGCTTCTCCTTTGTGAACCCCAAATTCGAGCACCTCCTGGAAGATTG  
A

>|cl|NM\_006257.5\_cds\_NP\_006248.1\_1 [gene=PRKCQ] [db\_xref=CCDS:CCDS7079.1] [protein=protein  
kinase C theta type isoform 1] [protein\_id=NP\_006248.1] [location=76..2196] [gbkey=CDS]

ATGTCGCCATTTCTTCGGATTGGCTTGTCCTTGAAGTTCGCGGGTCTGCCAGTCTTGTGAGGGCGAGG  
CTGTAAACCCTTACTGTGCTGTGCTCGTCAAAGAGTATGTGAATCAGAGAACGGGCAGATGTATATCCA  
GAAAAAGCCTACCATGTACCCACCCTGGGACAGCACTTTTGATGCCCATATCAACAAGGGAAGAGTCATG  
CAGATCATTGTGAAAGGCAAAAACGTGGACCTCATCTCTGAAACCACCGTGGAGCTCTACTCGCTGGCTG

AGAGGTGCAGGAAGAACAACGGGAAGACAGAAATATGGTTAGAGCTGAAACCTCAAGGCCGAATGCTAAT  
GAATGCAAGATACTTTCTGGAAATGAGTGACACAAAGGACATGAATGAATTTGAGACGGAAGGCTTCTTT  
GCTTGCATCAGCGCCGGGTGCCATCAAGCAGGCAAAGGTCCACCACGTCAAGTGCCACGAGTTCACTG  
CCACCTTCTTCCACAGCCCACATTTTGCTCTGTCTGCCACGAGTTTGTCTGGGGCCTGAACAAACAGGG  
CTACCAGTGCCGACAATGCAATGCAGCAATTCACAAGAAGTGTATTGATAAAGTTATAGCAAAGTGACACA  
GGATCAGCTATCAATAGCCGAGAAACCATGTTCCACAAGGAGAGATTCAAAATTGACATGCCACACAGAT  
TTAAAGTCTACAATTACAAGAGCCCGACCTTCTGTGAACACTGTGGGACCCTGCTGTGGGGACTGGCACG  
GCAAGGACTCAAGTGTGATGCATGTGGCATGAATGTGCATCATAGATGCCAGACAAAGGTGGCCAACCTT  
TGTGGCATAAACCAGAAGCTAATGGCTGAAGCGCTGGCCATGATTGAGAGCACTCAACAGGCTCGCTGCT  
TAAGAGATACTGAACAGATCTTCAGAGAAGGTCCGGTTGAAATTGGTCTCCCATGCTCCATCAAAAATGA  
AGCAAGGCCGCCATGTTTACCGACACCGGGAAAAAGAGAGCCTCAGGGCATTTCCTGGGAGTCTCCGTTG  
GATGAGGTGGATAAAATGTGCCATCTTCCAGAACCTGAACTGAACAAAGAAAGACCATCTCTGCAGATTA  
AACTAAAAATTGAGGATTTTATCTTGACAAAAATGTTGGGGAAAGGAAGTTTGGCAAGGTCTTCTGGC  
AGAATTCAAGAAAACCAATCAATTTTCGCAATAAAGGCCTTAAAGAAAGATGTGGTCTTGATGGACGAT  
GATGTTGAGTGCACGATGGTAGAGAAGAGAGTTCTTTCCTTGGCCTGGGAGCATCCGTTTCTGACGCACA  
TGTTTTGTACATTCCAGACCAAGGAAAACCTCTTTTTGTGATGGAGTACCTCAACGGAGGGGACTTAAT  
GTACCACATCCAAAGCTGCCACAAGTTCGACCTTTCAGAGCGACGTTTTATGCTGCTGAAATCATTCTT  
GGTCTGCAGTTCCTTCATTCAAAGGAATAGTCTACAGGGACCTGAAGCTAGATAACATCCTGTTAGACA  
AAGATGGACATATCAAGATCGCGGATTTTGAATGTGCAAGGAGAACATGTTAGGAGATGCCAAGACGAA  
TACCTTCTGTGGGACACCTGACTACATCGCCCCAGAGATCTTGCTGGGTCAGAAATACAACCACTCTGTG  
GACTGGTGGTCCTTCGGGGTTCTCCTTTATGAAATGCTGATTGGTCAGTCGCCTTTCACGGGCAGGATG  
AGGAGGAGCTCTTCCACTCCATCCGCATGGACAATCCCTTTTACCCACGGTGGCTGGAGAAGGAAGCAAA  
GGACCTTCTGGTGAAGCTCTTCGTGCGAGAACCTGAGAAGAGGCTGGGCGTGAGGGGAGACATCCGCCAG  
CACCCTTTGTTTCGGGAGATCAACTGGGAGGAACTTGAACGGAAGGAGATTGACCCACCGTTCCGGCCGA  
AAGTGAAATCACCATTTGACTGCAGCAATTCGACAAAGAATTCTTAAACGAGAAGCCCCGGCTGTCATT

TGCCGACAGAGCACTGATCAACAGCATGGACCAGAATATGTTTCAGGAACTTTTCCTTCATGAACCCCGGG  
ATGGAGCGGCTGATATCCTGA

>|cl|NM\_004562.3\_cds\_NP\_004553.2\_1 [gene=PRKN] [db\_xref=CCDS:CCDS5281.1] [protein=E3  
ubiquitin-protein ligase parkin isoform 1] [protein\_id=NP\_004553.2] [location=99..1496] [gbkey=CDS]

ATGATAGTGTTCAGGTTCAACTCCAGCCATGGTTTCCCAGTGGAGGTCGATTCTGACACCAGCATCT  
TCCAGCTCAAGGAGGTGGTTGCTAAGCGACAGGGGGTTCCGGCTGACCAGTTGCGTGTGATTTTCGCAGG  
GAAGGAGCTGAGGAATGACTGGACTGTGCAGAATTGTGACCTGGATCAGCAGAGCATTGTTACATTGTG  
CAGAGACCGTGGAGAAAAGGTCAAGAAATGAATGCAACTGGAGGCGACGACCCAGAAACGCGGCGGGAG  
GCTGTGAGCGGGAGCCCCAGAGCTTGACTCGGGTGGACCTCAGCAGCTCAGTCCTCCAGGAGACTCTGT  
GGGGCTGGCTGTCATTCTGCACACTGACAGCAGGAAGGACTCACCACCAGCTGGAAGTCCAGCAGGTAGA  
TCAATCTACAACAGCTTTTATGTGTATTGCAAAGGCCCTGTCAAAGAGTGCAGCCGGGAAACTCAGGG  
TACAGTGCAGCACCTGCAGGCAGGCAACGCTCACCTTGACCCAGGGTCCATCTTGCTGGGATGATGTTTT  
AATCCAAACCGGATGAGTGGTGAATGCCAATCCCCACACTGCCCTGGGACTAGTGCAGAATTTTCTTT  
AAATGTGGAGCACACCCACCTCTGACAAGGAAACATCAGTAGCTTTGCACCTGATCGCAACAAATAGTC  
GGAACATCACTTGCATTACGTGCACAGACGTCAGGAGCCCCGTCCTGGTTTTCCAGTGCAACTCCCGCCA  
CGTGATTTGCTTAGACTGTTTCCACTTATACTGTGTGACAAGACTCAATGATCGGCAGTTTGTTACGAC  
CCTCAACTTGGCTACTCCCTGCCTTGTGTGGCTGGCTGTCCCAACTCCTTGATTAAAGAGCTCCATCACT  
TCAGGATTCTGGGAGAAGAGCAGTACAACCGGTACCAGCAGTATGGTGCAGAGGAGTGTGTCCTGCAGAT  
GGGGGGCGTGTTATGCCCCGCCCTGGCTGTGGAGCGGGGCTGCTGCCGGAGCCTGACCAGAGGAAAGTC  
ACCTGCGAAGGGGGCAATGGCCTGGGCTGTGGGTTTGCCTTCTGCCGGAATGTAAAGAAGCGTACCATG  
AAGGGGAGTGCAGTGCCGTATTTGAAGCCTCAGGAACAATACTCAGGCCTACAGAGTCGATGAAAGAGC  
CGCCGAGCAGGCTCGTTGGGAAGCAGCCTCCAAAGAAACCATCAAGAAAACCAAGCCCTGTCCCCGC

TGCCATGTACCAAGTGGAAAAAATGGAGGCTGCATGCACATGAAGTGTCCGCAGCCCCAGTGCAGGCTCG  
AGTGGTGCTGGAAGTGTGGCTGCGAGTGGAACCGCGTCTGCATGGGGGACCACTGGTTCGACGTGTAG

>|cl|NM\_000314.8\_cds\_NP\_000305.3\_1 [gene=PTEN] [db\_xref=CCDS:CCDS31238.1]  
[protein=phosphatidylinositol 3,4,5-trisphosphate 3-phosphatase and dual-specificity protein  
phosphatase PTEN isoform PTEN] [protein\_id=NP\_000305.3] [location=846..2057] [gbkey=CDS]  
ATGACAGCCATCATCAAAGAGATCGTTAGCAGAAACAAAAGGAGATATCAAGAGGATGGATTGACTTAG  
ACTTGACCTATATTTATCCAAACATTATTGCTATGGGATTCCTGCAGAAAGACTGAAGGCGTATACAG  
GAACAATATTGATGATGTAGTAAGGTTTTTGGATTCAAAGCATAAAAACCATTACAAGATATACAATCTT  
TGTGCTGAAAGACATTATGACACCGCCAAATTTAATTGCAGAGTTGCACAATATCCTTTTGAAGACCATA  
ACCCACCACAGCTAGAACTTATCAAACCTTTTGTGAAGATCTTGACCAATGGCTAAGTGAAGATGACAA  
TCATGTTGCAGCAATTCAGTGTAAAGCTGGAAAGGGACGAACTGGTGTAAATGATATGTGCATATTTATTA  
CATCGGGGCAAATTTTTAAAGGCACAAGAGGCCCTAGATTTCTATGGGGAAGTAAGGACCAGAGACAAAA  
AGGGAGTAACTATCCCAGTCAGAGGCGCTATGTGTATTATTATAGCTACCTGTTAAAGAATCATCTGGA  
TTATAGACCAGTGGCACTGTTGTTTACAAGATGATGTTTGAAACTATTCCAATGTTCAAGTGGCGGAACT  
TGCAATCCTCAGTTTGTGGTCTGCCAGCTAAAGGTGAAGATATATTCCTCCAATTCAGGACCCACACGAC  
GGGAAGACAAGTTCATGTACTTTGAGTTCCCTCAGCCGTTACCTGTGTGTGGTGATATCAAAGTAGAGTT  
CTTCCACAAACAGAACAAGATGCTAAAAAAGGACAAAATGTTTCACTTTTGGGTAAATACATTCTTCATA  
CCAGGACCAGAGGAAACCTCAGAAAAAGTAGAAAATGGAAGTCTATGTGATCAAGAAATCGATAGCATTT  
GCAGTATAGAGCGTGCAGATAATGACAAGGAATATCTAGTACTTACTTTAACAAAAAATGATCTTGACAA  
AGCAAATAAAGACAAAGCCAACCGATACTTTTCTCCAAATTTTAAGGTGAAGCTGTACTTCACAAAAACA  
GTAGAGGAGCCGTCAAATCCAGAGGCTAGCAGTTCAACTTCTGTAACACCAGATGTTAGTGACAATGAAC  
CTGATCATTATAGATATTCTGACACCACTGACTCTGATCCAGAGAATGAACCTTTTGATGAAGATCAGCA

TACACAAATTACAAAAGTCTGA

>|cl|NM\_001256358.2\_cds\_NP\_001243287.1\_1 [gene=PTK6] [db\_xref=CCDS:CCDS74750.1]  
[protein=protein-tyrosine kinase 6 isoform 2] [protein\_id=NP\_001243287.1] [location=63..467]  
[gbkey=CDS]

ATGGTGTCCCGGGACCAGGCTCACCTGGGCCCCAAGTATGTGGGCCTCTGGGACTTCAAGTCCCGGACGG  
ACGAGGAGCTGAGCTTCCGCGCGGGGGACGTCTTCCACGTGGCCAGGAAGGAGGAGCAGTGGTGGTGGGC  
CACGCTGCTGGACGAGGCGGGTGGGGCCGTGGCCCAGGGCTATGTGCCCCACAACCTACCTGGCCGAGAGG  
GAGACGGTGGAGTCGGAACCTGCGGGACACGCAGGCTGTGCGGCACTACAAGATCTGGCGGCGTGCCGGG  
GGCCGGCTGCACCTGAACGAGGCGGTGTCCTTCCTCAGCCTGCCCGAGCTTGTGAACTACCACAGGGCCC  
AGAGCCTGTCCACGGCCTGCGGCTGGCCGCGCCCTGCCGGAAGCACGAGCCTGA

>|cl|NM\_001206836.2\_cds\_NP\_001193765.1\_1 [gene=RAB11A] [db\_xref=CCDS:CCDS58373.1]  
[protein=ras-related protein Rab-11A isoform 2] [protein\_id=NP\_001193765.1] [location=96..563]  
[gbkey=CDS]

ATGGGCACCCGCGACGACGAGTACGACTACCTCTTTAAAGTTGTCCTTATTGGAGATTCTGGTGTGGAA  
AGAGTAATCTCCTGTCTCGATTTACTCGAAATGAGTTTAATCTGGAAAGCAAGAGCACCATTGGAGTAGA  
GTTTGCAACAAGAAGCATCCAGGTTGATGGAAAAACAATAAAGGCACAGATATGGGACACAGCAGGGCAA  
GAGCGATATCGAGCTATAACATCAGCATATTATCGTGGAGCTGTAGGTGCCTTATTGGTTTATGACATTG  
CTAAACATCTCACATATGAAAATGTAGAGCGATGGCTGAAAGAACTGAGAGATCATGCTGATAGTAACAT  
TGTTATCATGCTTGTGGGCAATAAGAGTGATCTACGTCATCTCAGGGCAGTTCCTACAGATGAAGCAAGA

GCTTTTGCAGAAAAGAATGAAGCAAATGTCAGACAGACGCGAAAATGA

>|cl|NM\_004161.5\_cds\_NP\_004152.1\_1 [gene=RAB1A] [db\_xref=CCDS:CCDS46306.1] [protein=ras-related protein Rab-1A isoform 1] [protein\_id=NP\_004152.1] [location=192..809] [gbkey=CDS]

ATGTCCAGCATGAATCCCGAATATGATTATTTATTCAAGTTACTTCTGATTGGCGACTCAGGGGTTGGAA  
AGTCTTGCCTTCTTCTTAGGTTTGCAGATGATACATATACAGAAAGCTACATCAGCACAATTGGTGTGGA  
TTTCAAAATAAGAACTATAGAGTTAGACGGGAAAACAATCAAGCTTCAAATATGGGACACAGCAGGCCAG  
GAAAGATTTGAACAATCACCTCCAGTTATTACAGAGGAGCCCATGGCATCATAGTTGTGTATGATGTGA  
CAGATCAGGAGTCCTTCAATAATGTTAAACAGTGGCTGCAGGAAATAGATCGTTATGCCAGTGAAAATGT  
CAACAAATTGTTGGTAGGGAACAAATGTGATCTGACCACAAAGAAAGTAGTAGACTACACAACAGCGAAG  
GAATTTGCTGATTCCCTTGAATTCCGTTTTTGGAAACAGTGCTAAGAATGCAACGAATGTAGAACAGT  
CTTTCATGACGATGGCAGCTGAGATTA AAAAGCGAATGGGTCCCGGAGCAACAGCTGGTGGTGCTGAGAA  
GTCCAATGTTAAAATTCAGAGCACTCCAGTCAAGCAGTCAGGTGGAGGTTGCTGCTAA

>|cl|NM\_130781.4\_cds\_NP\_570137.2\_1 [gene=RAB24] [db\_xref=CCDS:CCDS34300.1] [protein=ras-related protein Rab-24] [protein\_id=NP\_570137.2] [location=346..957] [gbkey=CDS]

ATGAGCGGGCAGCGCGTGGACGTCAAGGTGGTGATGCTGGGCAAGGAGTACGTGGGCAAGACTAGCCTGG  
TGGAGCGCTACGTGCACGACCGCTTCTGGTGGGGCCTTATCAGAACACCATCGGGGCCGCTTCGTGGC  
CAAGGTGATGTGGTCGGAGACCGGACTGTGACATTAGGTATTTGGGACACAGCAGGCTCTGAGCGCTAT  
GAGGCCATGAGTAGAATCTACTATCGGGGTGCCAAGGCTGCCATCGTCTGCTATGACCTCACAGACAGCA

GCAGCTTTGAGCGAGCAAAGTTCTGGGTGAAGGAACTGCGCAGCCTAGAGGAGGGCTGCCAAATCTACTT  
ATGTGGCACCAAGAGTGACCTGCTGGAAGAAGACCGGAGGCGTCGACGTGTGGACTTCCACGACGTCCAG  
GACTATGCAGACAATATCAAAGCTCAGCTCTTTGAAACATCCAGCAAGACAGGCCAGAGTGTGGACGAGC  
TCTTCCAGAAAAGTGGCAGAGGATTACGTCAGTGTGGCTGCCTTCCAGGTGATGACAGAGGACAAGGGCGT  
GGATCTGGGCCAGAAGCCAAACCCCTACTTCTACAGCTGTTGTCATCACTGA

>|cl|NM\_031296.3\_cds\_NP\_112586.1\_1 [gene=RAB33B] [db\_xref=CCDS:CCDS3747.1] [protein=ras-  
related protein Rab-33B] [protein\_id=NP\_112586.1] [location=76..765] [gbkey=CDS]

ATGGCTGAGGAGATGGAGTCGTCGCTCGAGGCAAGCTTTTCGTCCAGCGGGGCAGTGTGAGGGGCCTCAG  
GGTTTTTGCCTCCTGCCCCTCCCGCATCTTCAAGATAATCGTGATCGGCGACTCCAATGTGGGCAAGAC  
ATGCCTGACCTACCGCTTCTGCGCTGGCCGCTTCCCCGACCGCACCGAGGCCACGATAGGGGTGGATTTT  
CGAGAACGAGCGGTGGAGATTGATGGGGAGCGCATCAAGATCCAGCTATGGGACACAGCAGGACAAGAAC  
GATTCAGAAAGAGCATGGTTCAGCACTACTACAGAAATGTACATGCTGTTGTCTTCGTGTATGATATGAC  
CAACATGGCTAGTTTTTCATAGCCTACCATCTTGGATAGAAGAATGCAAACAACATTTGCTAGCCAATGAT  
ATACCACGGATTCTTGTGGAAATAAATGTGACTTGAGAAGTGCCATACAGGTACCCACAGACTTGGCAC  
AAAAATTTGCTGACACACACAGTATGCCTTTGTTTGAAACGTCTGCTAAAAACCCCAATGATAATGACCA  
TGTGGAAGCTATATTTATGACCTTGGCTCATAAGCTTAAGAGCCACAAACCATTAATGCTTAGTCAGCCC  
CTGATAATGGAATTATCCTGAAGCCTGAACCAAAGCCTGCAATGACGTGCTGGTGCTAA

>|cl|NM\_004162.5\_cds\_NP\_004153.2\_1 [gene=RAB5A] [db\_xref=CCDS:CCDS2633.1] [protein=ras-related protein Rab-5A isoform 1] [protein\_id=NP\_004153.2] [location=519..1166] [gbkey=CDS]

ATGGCTAGTCGAGGCGCAACAAGACCCAACGGGCCAAATACGGGAAATAAAATATGCCAGTTCAAAC TAG  
TACTTCTGGGAGAGTCCGCTGTTGGCAAATCAAGCCTAGTGCTTCGTTTTGTGAAAGGCCAATTCATGA  
ATTTCAAGAGAGTACCATTGGGGCTGCTTTTCTAACCCAAACTGTATGTCTTGATGACACTACAGTAAAG  
TTTGAAATATGGGATACAGCTGGTCAAGAACGATACCATAGCCTAGCACCAATGTACTACAGAGGAGCAC  
AAGCAGCCATAGTTGTATATGATATCACAAATGAGGAGTCCTTTGCAAGAGCAAAAAATTGGGTAAAGA  
ACTTCAGAGGCAAGCAAGTCCTAACATTGTAATAGCTTTATCGGGAAACAAGGCCGACCTAGCAAATAAA  
AGAGCAGTAGATTTCCAGGAAGCACAGTCCTATGCAGATGACAATAGTTTATTATTCATGGAGACATCCG  
CTAAACATCAATGAATGTAAATGAAATATTCATGGCAATAGCTAAAAAATTGCCAAAGAATGAACCACA  
AAATCCAGGAGCAAATTCTGCCAGAGGAAGAGGAGTAGACCTTACCGAACCCACACAACCAACCAGGAAT  
CAGTGTTGTAGTAACTAA

>|cl|NM\_004637.6\_cds\_NP\_004628.4\_1 [gene=RAB7A] [db\_xref=CCDS:CCDS3052.1] [protein=ras-related protein Rab-7a] [protein\_id=NP\_004628.4] [location=186..809] [gbkey=CDS]

ATGACCTCTAGGAAGAAAGTGTTGCTGAAGGTTATCATCCTGGGAGATTCTGGAGTCGGGAAGACATCAC  
TCATGAACCAAGTATGTGAATAAGAAATTCAGCAATCAGTACAAAGCCACAATAGGAGCTGACTTTCTGAC  
CAAGGAGGTGATGGTGGATGACAGGCTAGTCACAATGCAGATATGGGACACAGCAGGACAGGAACGGTTC  
CAGTCTCTCGGTGTGGCCTTCTACAGAGGTGCAGACTGCTGCGTTCTGGTATTTGATGTGACTGCCCCCA  
ACACATTCAAAACCCTAGATAGCTGGAGAGATGAGTTTCTCATCCAGGCCAGTCCCCGAGATCCTGAAAA  
CTTCCCATTTGTTGTGTTGGGAAACAAGATTGACCTCGAAAACAGACAAGTGGCCACAAAGCGGGCACAG  
GCCTGGTGCTACAGCAAAAACAACATTCCCTACTTTGAGACCAAGTGCCAAGGAGGCCATCAACGTGGAGC  
AGGCGTTCCAGACGATTGCACGGAATGCACTTAAGCAGGAAACGGAGGTGGAGCTGTACAACGAATTTCC

TGAACCTATCAAAGTGGACAAGAATGACCGGGCCAAGGCCTCGGCAGAAAGCTGCAGTTGCTGA

>|cl|NM\_018890.4\_cds\_NP\_061485.1\_1 [gene=RAC1] [db\_xref=CCDS:CCDS5349.1] [protein=ras-related C3 botulinum toxin substrate 1 isoform Rac1b] [protein\_id=NP\_061485.1] [location=210..845] [gbkey=CDS]

ATGCAGGCCATCAAGTGTGTGGTGGTGGGAGACGGAGCTGTAGGTAAACTTGCCTACTGATCAGTTACA  
CAACCAATGCATTTCTGGAGAATATATCCCTACTGTCTTTGACAATTATTCTGCCAATGTTATGGTAGA  
TGGAACACCGGTGAATCTGGGCTTATGGGATACAGCTGGACAAGAAGATTATGACAGATTACGCCCCCTA  
TCCTATCCGCAAACAGTTGGAGAAACGTACGGTAAGGATATAACCTCCCGGGGCAAAGACAAGCCGATTG  
CCGATGTGTTCTTAATTTGCTTTTCCCTTGTGAGTCCTGCATCATTTGAAAATGTCCGTGCAAAGTGGTA  
TCCTGAGGTGCGGCACCACTGTCCCAACACTCCCATCATCCTAGTGGGAACTAACTTGATCTTAGGGAT  
GATAAAGACACGATCGAGAACTGAAGGAGAAGAAGCTGACTCCCATCACCTATCCGCAGGGTCTAGCCA  
TGGCTAAGGAGATTGGTGCTGTAAATACCTGGAGTGCTCGGCGCTCACACAGCGAGGCCTCAAGACAGT  
GTTTGACGAAGCGATCCGAGCAGTCCTCTGCCCGCTCCCGTGAAGAAGAGGAAGAGAAAATGCCTGCTG  
TTGTAA

>|cl|NM\_006098.5\_cds\_NP\_006089.1\_1 [gene=RACK1] [db\_xref=CCDS:CCDS34324.1] [protein=receptor of activated protein C kinase 1] [protein\_id=NP\_006089.1] [location=107..1060] [gbkey=CDS]

ATGACTGAGCAGATGACCTTCGTGGCACCTCAAGGGCCACAACGGCTGGGTAACCCAGATCGCTACTA  
CCCCGCAGTTCCCGGACATGATCCTCTCCGCCTCTCGAGATAAGACCATCATCATGTGGAACTGACCAG  
GGATGAGACCAACTATGGAATTCCACAGCGTGCTCTGCGGGGTCACTCCCACTTTGTTAGTGATGTGGTT

ATCTCCTCAGATGGCCAGTTTGCCTCTCAGGCTCCTGGGATGGAACCCTGCGCCTCTGGGATCTCACAA  
CGGGCACCACCACGAGGCGATTTGTGGGCCATACCAAGGATGTGCTGAGTGTGGCCTTCTCCTCTGACAA  
CCGGCAGATTGTCTCTGGATCTCGAGATAAAACCATCAAGCTATGGAATACCCTGGGTGTGTGCAAATAC  
ACTGTCCAGGATGAGAGCCACTCAGAGTGGGTGTCTTGTGTCCGCTTCTCGCCCAACAGCAGCAACCCTA  
TCATCGTCTCCTGTGGCTGGGACAAGCTGGTCAAGGTATGGAACCTGGCTAACTGCAAGCTGAAGACCAA  
CCACATTGGCCACACAGGCTATCTGAACACGGTGAAGTGTCTCTCCAGATGGATCCCTCTGTGCTTCTGGA  
GGCAAGGATGGCCAGGCCATGTTATGGGATCTCAACGAAGGCAAACACCTTTACACGCTAGATGGTGGGG  
ACATCATCAACGCCCTGTGCTTCAGCCCTAACCGCTACTGGCTGTGTGCTGCCACAGGCCCCAGCATCAA  
GATCTGGGATTTAGAGGGAAAGATCATTGTAGATGAACTGAAGCAAGAAGTTATCAGTACCAGCAGCAAG  
GCAGAACCACCCAGTGCACCTCCCTGGCCTGGTCTGCTGATGGCCAGACTCTGTTTGCTGGCTACACGG  
ACAACCTGGTGCGAGTGTGGCAGGTGACCATTGGCACACGCTAG

>|cl|NM\_002880.4\_cds\_NP\_002871.1\_1 [gene=RAF1] [db\_xref=CCDS:CCDS2612.1] [protein=RAF proto-oncogene serine/threonine-protein kinase isoform b] [protein\_id=NP\_002871.1] [location=332..2278] [gbkey=CDS]

ATGGAGCACATACAGGGAGCTTGGAAGACGATCAGCAATGGTTTTGGATTCAAAGATGCCGTGTTTGATG  
GCTCCAGCTGCATCTCTCCTACAATAGTTCAGCAGTTTGGCTATCAGCGCCGGGCATCAGATGATGGCAA  
ACTCACAGATCCTTCTAAGACAAGCAACACTATCCGTGTTTTCTTGCCGAACAAGCAAAGAAGAGTGGTC  
AATGTGCGAAATGGAATGAGCTTGCATGACTGCCTTATGAAAGCACTCAAGGTGAGGGGCTGCAACCAG  
AGTGCTGTGCAGTGTTGAGACTTCTCCACGAACACAAAGGTAAAAAAGCACGCTTAGATTGGAATACTGA  
TGCTGCGTCTTTGATTGGAGAAGAACTTCAAGTAGATTTCTGGATCATGTTCCCTCACACACACAAC  
TTTGCTCGGAAGACGTTCTGAAGCTTGCCTTCTGTGACATCTGTCAGAAATTCCTGCTCAATGGATTTCT  
GATGTCAGACTTGTGGCTACAAATTCATGAGCACTGTAGCACCAAAGTACCTACTATGTGTGTGGACTG

GAGTAACATCAGACAACTCTTATTGTTTCCAAATTCCACTATTGGTGATAGTGGAGTCCCAGCACTACCT  
TCTTTGACTATGCGTCGTATGCGAGAGTCTGTTTCCAGGATGCCTGTTAGTTCTCAGCACAGATATTCTA  
CACCTCACGCCTTCACCTTTAACACCTCCAGTCCCTCATCTGAAGGTTCCCTCTCCCAGAGGCAGAGGTC  
GACATCCACACCTAATGTCCACATGGTCAGCACACCACCTGCCTGTGGACAGCAGGATGATTGAGGATGCA  
ATTCGAAGTCACAGCGAATCAGCCTCACCTTCAGCCCTGTCCAGTAGCCCCAACAACTCTGAGCCCCAACAG  
GCTGGTCACAGCCGAAAACCCCGTGCCAGCACAAAGAGAGCGGGCACCAGTATCTGGGACCCAGGAGAA  
AAACAAAATTAGGCCTCGTGGACAGAGAGATTCAAGCTATTATTGGGAAATAGAAGCCAGTGAAGTGATG  
CTGTCCACTCGGATTGGGTGAGGCTCTTTTGAACTGTTTATAAGGGTAAATGGCACGGAGATGTTGCAG  
TAAAGATCCTAAAGGTTGTGACCCAACCCAGAGCAATTCCAGGCCTTCAGGAATGAGGTGGCTGTTCT  
GCGCAAAACACGGCATGTGAACATTCTGCTTTTCATGGGGTACATGACAAAGGACAACCTGGCAATTGTG  
ACCCAGTGGTGCGAGGGCAGCAGCCTCTACAAACACCTGCATGTCCAGGAGACCAAGTTTCAGATGTTCC  
AGCTAATTGACATTGCCCAGGACAGGCTCAGGGAATGGACTATTTGCATGCAAAGAACATCATCCATAG  
AGACATGAAATCCAACAATATATTTCTCCATGAAGGCTTAACAGTGAAAATTGGAGATTTTGGTTTGGCA  
ACAGTAAAGTCACGCTGGAGTGGTTCTCAGCAGGTTGAACAACCTACTGGCTCTGTCTCTGGATGGCCC  
CAGAGGTGATCCGAATGCAGGATAACAACCCATTTCAGTTTCCAGTCGGATGTCTACTCCTATGGCATCGT  
ATTGTATGAACTGATGACGGGGGAGCTTCCTTATTCTCACATCAACAACCGAGATCAGATCATCTTCATG  
GTGGGCCGAGGATATGCCTCCCCAGATCTTAGTAAGCTATATAAGAACTGCCCCAAAGCAATGAAGAGGC  
TGGTAGCTGACTGTGTGAAGAAAGTAAAGGAAGAGAGGCCTCTTTTTCCCAGATCCTGTCTTCCATTGA  
GCTGCTCCAACACTCTCTACCGAAGATCAACCGGAGCGCTCCGAGCCATCCTTGCATCGGGCAGCCCAC  
ACTGAGGATATCAATGCTTGACGCTGACCACGTCCCCGAGGCTGCCTGTCTTCTAG

>|cl|NM\_000321.3\_cds\_NP\_000312.2\_1 [gene=RB1] [db\_xref=CCDS:CCDS31973.1]  
[protein=retinoblastoma-associated protein isoform 1] [protein\_id=NP\_000312.2] [location=163..2949]  
[gbkey=CDS]

ATGCCGCCAAAACCCCCGAAAAACGGCCGCCACCGCCGCCGCTGCCGCCGCGGAACCCCCGGCACCGC  
CGCCGCCGCCCTCCTGAGGAGGACCCAGAGCAGGACAGCGGCCCGGAGGACCTGCCTCTCGTCAGGCT  
TGAGTTTGAAGAAACAGAAGAACCTGATTTTACTGCATTATGTCAGAAATTAAAGATACCAGATCATGTC  
AGAGAGAGAGCTTGGTTAACTTGGGAGAAAAGTTTCATCTGTGGATGGAGTATTGGGAGGTTATATTCAA  
AGAAAAAGGAACTGTGGGGAATCTGTATCTTTATTGCAGCAGTTGACCTAGATGAGATGTCGTTCACTTT  
TACTGAGCTACAGAAAAACATAGAAATCAGTGTCCATAAATTCTTTAACTTACTAAAAGAAATTGATACC  
AGTACCAAAGTTGATAATGCTATGTCAAGACTGTTGAAGAAGTATGATGTATTGTTGCACTCTTCAGCA  
AATTGGAAAGGACATGTGAACTTATATATTTGACACAACCCAGCAGTTCGATATCTACTGAAATAAATTC  
TGCATTGGTGCTAAAAGTTTCTTGGATCACATTTTTATTAGCTAAAGGGGAAGTATTACAAATGGAAGAT  
GATCTGGTGATTTCAATTCAGTTAATGCTATGTGTCCTTGACTATTTTATTAAGTCTCACCTCCCATGT  
TGCTCAAAGAACCATATAAAACAGCTGTTATACCCATTAATGGTTCACCTCGAACACCCAGGCGAGGTCA  
GAACAGGAGTGACGGATAGCAAAACAAGTAGAAAATGATACAAGAATTATTGAAGTTCTCTGTAAAGAA  
CATGAATGTAATATAGATGAGGTGAAAAATGTTTATTTCAAAAATTTTATACCTTTTATGAATTCTCTTG  
GACTTGTAACATCTAATGGACTTCCAGAGGTTGAAAATCTTTCTAAACGATACGAAGAAATTTATCTTAA  
AATAAAGATCTAGATGCAAGATTATTTTTGGATCATGATAAACTCTTCAGACTGATTCTATAGACAGT  
TTTGAAACACAGAGAACACCACGAAAAAGTAACCTTGATGAAGAGGTGAATGTAATCCTCCACACACTC  
CAGTTAGGACTGTTATGAACACTATCCAACAATTAATGATGATTTTAAATTCAGCAAGTGATCAACCTTC  
AGAAAATCTGATTCCTATTTTAACAAGTGCACAGTGAATCCAAAAGAAAGTATACTGAAAAGAGTGAAG  
GATATAGGATACATCTTTAAAGAGAAATTTGCTAAAGCTGTGGGACAGGGTTGTGTGCGAAATTGGATCAC  
AGCGATACAACTTGGAGTTCGCTTGATTACCGAGTAATGGAATCCATGCTTAAATCAGAAGAAGAACG  
ATTATCCATTCAAAATTTTAGCAAATCTCTGAATGACAACATTTTTCATATGTCTTTATTGGCGTGCGCT  
CTTGAGGTTGTAATGGCCACATATAGCAGAAGTACATCTCAGAATCTTGATTCTGGAACAGATTTGTCTT  
TCCCATGGATTCTGAATGTGCTTAATTTAAAAGCCTTTGATTTTACAAAGTGATCGAAAGTTTTATCAA

AGCAGAAGGCAACTTGACAAGAGAAATGATAAAACATTTAGAACGATGTGAACATCGAATCATGGAATCC  
CTTGCATGGCTCTCAGATTCACCTTTATTTGATCTTATTAACAATCAAAGGACCGAGAAGGACCAACTG  
ATCACCTTGAATCTGCTTGTCTCTTAATCTTCCTCTCCAGAATAATCACACTGCAGCAGATATGTATCT  
TTCTCCTGTAAGATCTCCAAAGAAAAAAGGTTCAACTACGCGTGTAATTCTACTGCAAATGCAGAGACA  
CAAGCAACCTCAGCCTTCCAGACCCAGAAGCCATTGAAATCTACCTCTCTTTCAGTGTATATAAAAAAG  
TGTATCGGCTAGCCTATCTCCGGCTAAATACACTTTGTGAACGCCTTCTGTCTGAGCACCCAGAATTAGA  
ACATATCATCTGGACCCTTTTCCAGCACACCCTGCAGAATGAGTATGAACTCATGAGAGACAGGCATTTG  
GACCAAATTATGATGTGTTCCATGTATGGCATATGCAAAGTGAAGAATATAGACCTTAAATTCAAAATCA  
TTGTAACAGCATACAAGGATCTTCCTCATGCTGTTGAGGAGACATTCAAACGTGTTTTGATCAAAGAAGA  
GGAGTATGATTCTATTATAGTATTCTATAACTCGGTCTTCATGCAGAGACTGAAAACAAATATTTTGCAG  
TATGCTTCCACCAGGCCCCCTACCTTGTACCAATACCTCACATTCCTCGAAGCCCTTACAAGTTTCCTA  
GTTACCCCTTACGGATTCTGGAGGGAACATCTATATTTACCCCTGAAGAGTCCATATAAAATTTCAGA  
AGGTCTGCCAACACCAACAAAAATGACTCCAAGATCAAGAATCTTAGTATCAATTGGTGAATCATTCTGGG  
ACTTCTGAGAAGTTCCAGAAAATAAATCAGATGGTATGTAACAGCGACCGTGTGCTCAAAGAAGTGCTG  
AAGGAAGCAACCCTCTAAACCACTGAAAAAACTACGCTTTGATATTGAAGGATCAGATGAAGCAGATGG  
AAGTAAACATCTCCAGGAGAGTCCAAATTTAGCAGAAACTGGCAGAAATGACTTCTACTCGAACACGA  
ATGCAAAAGCAGAAAATGAATGATAGCATGGATACCTCAAACAAGGAAGAGAAATGA

>|cl|NM\_014781.5\_cds\_NP\_055596.3\_1 [gene=RB1CC1] [db\_xref=CCDS:CCDS34892.1] [protein=RB1-  
inducible coiled-coil protein 1 isoform 1] [protein\_id=NP\_055596.3] [location=528..5312] [gbkey=CDS]

ATGAAGTTATATGTATTTCTGGTTAACTGGAACACTCTAACATTTGACACTGAACTTACAGTGCAAA  
CTGTGGCAGACCTTAAGCATGCCATTCAAAGCAAATACAAGATTGCTATTCAACACCAGGTGCTGGTGGT  
CAATGGAGGAGAATGCATGGCTGCAGATCGAAGAGTGTGTACCTACAGTGCTGGGACGGATACAAATCCA

ATTTTTCTTTTAAACAAAGAAATGATCTTATGTGATCGTCCACCTGCTATTCTAAAACTACCTTTTCGA  
CAGAAAATGACATGGAAATAAAAGTTGAAGAATCTCTTATGATGCCTGCAGTTTTTCATACTGTTGCTTC  
AAGGACACAGCTTGCATTGGAAATGTATGAAGTTGCCAAGAACTTTGTTCTTTTGTGAAGGTCTTGTA  
CATGATGAACATCTTCAACACCAAGGCTGGGCTGCAATCATGGCCAACCTGGAGGACTGTTCAAATTCAT  
ACCAAAGCTACTTTTCAAGTTTGAAAGTATTTATTCAAATTATCTGCAGTCCATAGAAGACATCAAGTT  
AAAACCTACTCATTTAGGAACTGCAGTTTCAGTAATGGCCAAGATTCCACTGTTGGAGTGCCTAACCAGA  
CATAGTTACAGAGAATGTTTGGGAAGACTGGATTCTTTACCTGAACATGAAGACTCAGAAAAAGCTGAGA  
TGAAAAGATCCACTGAACTGGTGCTCTCTCCTGATATGCCTAGAACAACTAACGAATCTTTGTTAACCTC  
ATTTCCCAAGTCAGTGGAACATGTGTCCCAGATACCGCAGATGCTGAAAGTGGCAAAGAAATTAGGGAA  
TCTTGTCAAAGTACTGTTTCATCAGCAAGATGAACTACGATTGACACTAAAGATGGTGATCTGCCCTTTT  
TTAATGTCTCTTTGTTAGACTGGATAAATGTTCAAGATAGACCTAATGATGTGGAATCTTTGGTCAGGAA  
GTGCTTGATTCTATGAGCAGGCTTGATCCAAGGATTATTCGACCATTATAGCAGAATGCCGTCAAAC  
ATTGCCAACTTGATAATCAGAATATGAAAGCCATTAAAGGACTTGAAGATCGGCTCTACGCCCTGGACC  
AGATGATTGCTAGCTGTGGCCGACTGGTGAATGAACAGAAAGAGCTTGCTCAGGGATTTTTAGCTAATCA  
GAAGAGAGCTGAAAACCTAAAGGATGCATCTGTATTACCTGATTTATGCCTGAGTCACGCAAATCAGTTG  
ATGATTATGTTGCAAAATCATAGAAAACCTGTTAGATATTAAGCAGAAGTGTAACCTGCCAAACAAGAAC  
TAGCAAATAACCTACATGTCAGACTGAAGTGGTGTTGCTTTGTAATGCTTCATGCTGATCAAGATGGAGA  
GAAGTTACAAGCTTTGCTCCGCCTCGTAATAGAGCTGTTAGAAAGAGTCAAATTGTTGAAGCTCTTAGT  
ACAGTTCCTCAGATGTACTGCTTAGCTGTTGTTGAGGTTGTAAGAAGAAAAATGTTCAAAAACACTACA  
GGGAGTGGGCTGGTGCTTTAGTCAAAGATGGAAAGAGATTATATGAAGCAGAAAAATCAAAAAGGGAATC  
CTTTGGGAAATTATTTAGGAAGTCTTTTTTAAGAAATCGTCTGTTTAGGGGACTGGACTCCTGGCCCCCT  
TCCTTTTGTACTCAAAGCCTCGAAAGTTTGACTGTGAACTTCAGATATTTCAATAAAAGATTACAGT  
TTCTGCAATCATTTTGTCTTCGGAAGTTCAGCCATTCCTCAGGGTTCCTTACTTTGTGACTTTGAACC  
TCTACACCAGCATGTACTTGCTCTACATAATTTGGTAAAAGCAGCACAAAGTTTGGATGAAATGTCACAG  
ACATTACAGATCTACTGAGTGAACAAAAGGCATCTGTGAGTCAGACATCCCCACAGTCTGCTTCTCAC

CAAGGATGGAAAGTACAGCAGGAATTACAACACTACTACCTCACCGAGAACTCCTCCACCACTGACTGTTCA  
GGATCCCTTATGTCCTGCAGTTTGTCCCTTAGAAGAATTATCTCCAGATAGTATTGATGCACATACGTTT  
GATTTTGAAACTATTCCCATCCAAACATAGAACAGACTATTACCAAGTTTCTTTAGACTTGGATTCA  
TAGCAGAAAGTCCTGAATCAGATTTTATGTCTGCTGTGAATGAGTTTGTAATAGAAGAAAATTTGTCGTC  
TCCTAATCCTATAAGTGATCCACAAAGCCCAGAAATGATGGTGGAATCACTTTATTCATCAGTTATCAAT  
GCGATAGACAGTAGACGAATGCAGGATACAAATGTATGTGGTAAGGAGGATTTTGGAGATCATACTTCTC  
TGAATGTCCAGTTGGAAAGATGTAGAGTTGTTGCCCAAGACTCTCACTTCAGTATACAAACCATTAAGGA  
AGACCTTTGCCACTTTAGAACATTTGTACAAAAAGAACAGTGTGACTTCTCAAATTCATTAATGTACA  
GCAGTAGAAATAAGAAACATTATTGAAAAAGTAAATGTTCTCTGGAAATAACACTAAAAGAAAAACATC  
AAAAAGAACTACTGTCTTTAAAAAATGAATATGAAGGTAACTTGACGGACTAATAAAGGAACTGAAGA  
GAATGAAAACAAAATTAATAAATTGAAGGGAGAGTTAGTATGCCTTGAGGAGGTTTTACAAAATAAAGAT  
AATGAATTTGCTTTGGTTAAACATGAAAAAGAAGCTGTAATCTGCCTGCAGAATGAAAAGGATCAGAAGT  
TGTTAGAGATGGAAAATATAATGCACTCTCAAATTTGTGAAATTAAGAACTGAAGCAGTCACGAGAAAT  
AGTGTTAGAAGACTTAAAAAGCTCCATGTTGAAAATGATGAGAAGTTACAGTTATTGAGGGCAGAACTT  
CAGTCCTTGGAGCAAAGTCATCTAAAGGAATTAGAGGACACACTTCAGGTTAGGCACATACAAGAGTTTG  
AGAAGGTTATGACAGACCACAGAGTTTCTTTGGAGGAATTAAGAAAGGAAAACCAACAAATAATTAATCA  
AATACAAGAATCTCATGCTGAAATTATCCAGGAAAAAGAAAAACAGTTACAGGAATTAAGCTCAAGGTT  
TCTGATTTGTCAGACACGAGATGCAAGTTAGAGGTTGAACTTGCGTTGAAGGAAGCAGAACTGATGAAA  
TAAAAATTTTGCTGGAAGAAAGCAGAGCCCAGCAGAAGGAGACCTTGAAATCTCTTCTTGAACAAGAGAC  
AGAAAATTTGAGAACAGAAATTAGTAACTCAACCAAAAGATTGAGGATAATAATGAAAATTATCAGGTG  
GGCTTAGCAGAGCTAAGAACTTTAATGACAATTGAAAAAGATCAGTGTATTTCCGAGTTAATTAGTAGAC  
ATGAAGAAGAATCTAATATACTTAAAGCTGAATTAACAAAGTAACATCTTGCATAACCAAGCATTGGA  
AATAGAAAAAACCTAAAAGAACAAATAATTGAACTGCAGAGTAAATTGGATTCAGAATTGAGTGCTCTT  
GAAAGACAAAAAGATGAAAAATTACCAACAAGAAGAGAAATACGAAGCTATTATCCAGAACCTTGAGA  
AAGACAGACAAAAATTGGTCAGCAGCCAGGAGCAAGACAGAGAACAGTTAATTCAGAAGCTTAATTGTGA

AAAAGATGAAGCTATTCAGACTGCCCTAAAAGAATTTAAATTGGAGAGAGAAGTTGTTGAGAAAGAGTTA  
TTAGAAAAAGTTAAACATCTTGAGAATCAAATAGCAAAAAGTCCTGCCATTGACTCTACCAGAGGAGATT  
CTTCAAGCTTAGTTGCTGAACTTCAAGAAAAGCTTCAGGAAGAAAAAGCTAAGTTTCTAGAACAACCTGA  
AGAGCAAGAAAAAAGAAAGAATGAAGAAATGCAAAATGTTCGAACATCTTTGATTGCGGAACAACAGACC  
AATTTTAACACTGTTTTAACAAGAGAGAAAAATGAGAAAAGAAAACATAATAAATGATCTTAGTGATAAGT  
TGAAAAGTACAATGCAGCAACAAGAACGGGATAAAGATTTGATAGAGTCACTTTCTGAAGATCGAGCTCG  
TTTGCTTGAGGAAAAGAAAAAGCTTGAAGAAGAAGTCAGTAAGTTGCGTAGTAGCAGTTTTGTTCTTCA  
CCATATGTAGCTACAGCCCCAGAACTTTATGGAGCTTGTGCACCTGAACTCCCAGGTGAATCAGATAGAT  
CCGCTGTGGAACAGCAGATGAAGGAAGAGTGGATTGAGCAATGGAGACAAGCATGATGTCTGTACAAGA  
AAATATTCATATGTTGTCTGAAGAAAAACAGCGGATAATGCTGTTAGAACGAACATTGCAATTGAAAGAA  
GAAGAAAATAAACGGTTAAATCAAAGACTGATGTCTCAGAGCATGTCTTCAGTATCTTCAAGGCATTCTG  
AAAAGATAGCTATTAGAGATTTTCAGGTGGGAGATTTGGTACTCATCATCCTAGACGAACGCCATGACAA  
TTATGTGTTATTTACTGTTAGTCCTACTTTATATTTTCTACATTCAGAGTCTCTACCTGCCCTGGATCTC  
AAACCAGGTGAGGGTGCTTCAGGTGCATCTAGAAGACCCTGGGTACTTGAAAAAGTAATGAAAAAGAAT  
ACTGTCAAGCCAAAAAGGCACAAAACAGATTTAAAGTTCCTTTGGGGACAAAGTTTTACAGAGTGAAAGC  
CGTATCATGGAATAAGAAAGTATAA

>|cl|NM\_021975.4\_cds\_NP\_068810.3\_1 [gene=RELA] [db\_xref=CCDS:CCDS31609.1]  
[protein=transcription factor p65 isoform 1] [protein\_id=NP\_068810.3] [location=85..1740] [gbkey=CDS]

ATGGACGAACTGTTCCCCCTCATCTTCCCGGCAGAGCCAGCCAGGCCTCTGGCCCCTATGTGGAGATCA  
TTGAGCAGCCCAAGCAGCGGGGCATGCGCTTCCGCTACAAGTGCGAGGGGCGCTCCGCGGGCAGCATCCC  
AGGCGAGAGGAGCACAGATACCACCAAGACCCACCCACCATCAAGATCAATGGCTACACAGGACCAGGG  
ACAGTGCGCATCTCCCTGGTCACCAAGGACCCTCCTACCGGCCTACCCCCACGAGCTTGTAGGAAAGG

ACTGCCGGGATGGCTTCTATGAGGCTGAGCTCTGCCCGGACCGCTGCATCCACAGTTTCCAGAACCTGGG  
AATCCAGTGTGTGAAGAAGCGGGACCTGGAGCAGGCTATCAGTCAGCGCATCCAGACCAACAACAACCCC  
TTCCAAGTTCCTATAGAAGAGCAGCGTGGGGACTACGACCTGAATGCTGTGCGGCTCTGCTTCCAGGTGA  
CAGTGCGGGACCCATCAGGCAGGCCCTCCGCCTGCCGCTGTCCTTCTCATCCCATCTTTGACAATCG  
TGCCCCAACACTGCCGAGCTCAAGATCTGCCGAGTGAACCGAACTCTGGCAGCTGCCTCGGTGGGGAT  
GAGATCTTCTACTGTGTGACAAGGTGCAGAAAGAGGACATTGAGGTGTATTTACGGGACCAGGCTGGG  
AGGCCCAGGCTCCTTTTCGCAAGCTGATGTGCACCGACAAGTGGCCATTGTGTTCCGGACCCCTCCCTA  
CGCAGACCCCAGCCTGCAGGCTCCTGTGCGTGTCTCCATGCAGCTGCGGCGGCCTTCCGACCGGGAGCTC  
AGTGAGCCCATGGAATTCAGTACCTGCCAGATACAGACGATCGTCACCGGATTGAGGAGAAACGTAAAA  
GGACATATGAGACCTTCAAGAGCATCATGAAGAAGAGTCCTTTCAGCGGACCCACCGACCCCCGGCCTCC  
ACCTCGACGCATTGCTGTGCCTTCCCGCAGCTCAGCTTCTGTCCCAAGCCAGCACCCCAGCCCTATCCC  
TTTACGTCATCCCTGAGCACCATCAACTATGATGAGTTTCCCACCATGGTGTTCCTTCTGGGCAGATCA  
GCCAGGCCTCGGCCTTGGCCCCGGCCCCCTCCCAAGTCCTGCCCCAGGCTCCAGCCCCTGCCCTGCTCC  
AGCCATGGTATCAGCTCTGGCCCAGGCCCCAGCCCCTGTCCCAGTCCTAGCCCCAGGCCCTCCTCAGGCT  
GTGGCCCCACCTGCCCCAAGCCCACCCAGGCTGGGGAAGGAACGCTGTCAGAGGCCCTGCTGCAGCTGC  
AGTTTGATGATGAAGACCTGGGGGCCTTGCTTGGCAACAGCACAGACCCAGCTGTGTTACAGACCTGGC  
ATCCGTCGACAACTCCGAGTTTCAGCAGCTGCTGAACCAGGGCATACTGTGGCCCCCACACAACTGAG  
CCCATGCTGATGGAGTACCCTGAGGCTATAACTCGCCTAGTGACAGGGGCCAGAGGCCCCCCGACCCAG  
CTCCTGCTCCACTGGGGGCCCCGGGGCTCCCAATGGCCTCCTTTCAGGAGATGAAGACTTCTCCTCCAT  
TGCGGACATGGACTTCTCAGCCCTGCTGAGTCAGATCAGCTCCTAA

>|cl|NM\_005873.3\_cds\_NP\_005864.1\_1 [gene=RGS19] [db\_xref=CCDS:CCDS13555.1] [protein=regulator  
of G-protein signaling 19] [protein\_id=NP\_005864.1] [location=294..947] [gbkey=CDS]

ATGCCCACCCCGCATGAGGCTGAGAAGCAGATCACAGGGCCAGAGGAGGCGGACCGGCCCCCTTCAATGT  
CCAGTCATGATACAGCCTCTCCAGCGGCCCCCAGCCGCAACCCCTGCTGCCTGTGCTGGTGCTGCTGCTG  
TAGCTGCTCCTGGAACCAAGAGCGGCGGCGCGCGTGGCAGGCCTCCCGGGAGAGCAAGCTGCAGCCCCTC  
CCCAGCTGTGAAGTATGTGCCACGCCAAGTCCTGAGGAGGTGCAGAGCTGGGCGCAGTCTTTTGACAAGC  
TGATGCACAGCCCAGCGGGACGCAGCGTGTCCGGGCGTTCCTGCGGACAGAGTACAGCGAGGAGAACAT  
GCTCTTCTGGTTGGCCTGCGAGGAGCTGAAGGCCGAGGCCAACCAGCATGTGGTAGACGAGAAGGCGAGG  
CTCATCTACGAGGACTACGTATCCATCCTGTCCCCAAGGAGGTGAGCCTGGACTCCCGTGTGCGGGAGG  
GCATCAACAAGAAGATGCAGGAGCCGTCCGCACACACGTTGACGACGCGCAGCTGCAGATCTACACGCT  
CATGCACCGGGACTCCTACCCCCGCTTCCTCAGCTCTCCACCTACCGTGCCCTGCTGCTGCAGGGGCCA  
TCACAGTCCTCCTCCGAGGCCTAG

>|cl|NM\_005614.4\_cds\_NP\_005605.1\_1 [gene=RHEB] [db\_xref=CCDS:CCDS5927.1] [protein=GTP-binding protein Rheb] [protein\_id=NP\_005605.1] [location=385..939] [gbkey=CDS]

ATGCCGCGAGTCCAAGTCCCGGAAGATCGCGATCCTGGGCTACCGGTCTGTGGGGAAATCCTCATTGACGA  
TTCAATTTGTTGAAGGCCAATTTGTGGACTCCTACGATCCAACCATAGAAAACACTTTTACAAAGTTGAT  
CACAGTAAATGGACAAGAATATCATCTTCAACTTGTAGACACAGCCGGGCAAGATGAATATTCTATCTTT  
CCTCAGACATACTCCATAGATATTAATGGCTATATTCTTGTGTATTCTGTTACATCAATCAAAAGTTTTG  
AAGTGATTAAAGTTATCCATGGCAAATTGTTGGATATGGTGGGGAAAGTACAAATACCTATTATGTTGGT  
TGGAATAAGAAAGACCTGCATATGGAAAGGGTGATCAGTTATGAAGAAGGGAAAGCTTTGGCAGAATCT  
TGGAATGCAGCTTTTTTGAATCTTCTGCTAAAGAAAATCAGACTGCTGTGGATGTTTTTCGAAGGATAA  
TTTTGGAGGCAGAAAAAATGGACGGGGCAGCTTCACAAGGCAAGTCTTCATGCTCGGTGATGTGA

>|cl|NM\_003161.4\_cds\_NP\_003152.1\_1 [gene=RPS6KB1] [db\_xref=CCDS:CCDS11621.1]  
[protein=ribosomal protein S6 kinase beta-1 isoform a] [protein\_id=NP\_003152.1] [location=65..1642]  
[gbkey=CDS]

ATGAGGCGACGAAGGAGGCGGGACGGCTTTTACCCAGCCCCGGAAGCTGAGGACA  
TGGCAGGAGTGTGTTGACATAGACCTGGACCAGCCAGAGGACGCGGGCTCTGAGGATGAGCTGGAGGAGGG  
GGGTCAGTTAAATGAAAGCATGGACCATGGGGGAGTTGGACCATATGAACTGGCATGGAACATTGTGAG  
AAATTTGAAATCTCAGAACTAGTGTGAACAGAGGGCCAGAAAAATCAGACCAGAATGTTTTGAGCTAC  
TTCGGGTACTTGGTAAAGGGGGCTATGGAAAGGTTTTTCAAGTACGAAAAGTAACAGGAGCAAATACTGG  
GAAAATATTTGCCATGAAGGTGCTTAAAAAGGCAATGATAGTAAGAAATGCTAAAGATACAGCTCATACA  
AAAGCAGAACGGAATATTCTGGAGGAAGTAAAGCATCCCTTCATCGTGGATTAAATTTATGCCTTTCAGA  
CTGGTGGAAAACCTCTACCTCATCCTTGAGTATCTCAGTGGAGGAGAACTATTTATGCAGTTAGAAAGAGA  
GGGAATATTTATGGAAGACACTGCCTGCTTTTACTTGGCAGAAATCTCCATGGCTTTGGGGCATTACAT  
CAAAAGGGGATCATCTACAGAGACCTGAAGCCGGAGAATATCATGCTTAATCACCAAGGTCATGTGAAAC  
TAACAGACTTTGGACTATGCAAAGAATCTATTCATGATGGAACAGTCACACACACATTTTGTGGAACAAT  
AGAATACATGGCCCCTGAAATCTTGATGAGAAGTGGCCACAATCGTGCTGTGGATTGGTGGAGTTTGGGA  
GCATTAATGTATGACATGCTGACTGGAGCACCCCCATTCACTGGGGAGAATAGAAAGAAAACAATTGACA  
AAATCCTCAAATGTAACTCAATTTGCCTCCCTACCTCACACAAGAAGCCAGAGATCTGCTTAAAAAGCT  
GCTGAAAAGAAATGCTGCTTCTCGTCTGGGAGCTGGTCCTGGGGACGCTGGAGAAGTTCAAGCTCATCCA  
TTCTTTAGACACATTAATGGAAGAACTTCTGGCTCGAAAGGTGGAGCCCCCTTTAAACCTCTGTTGC  
AATCTGAAGAGGATGTAAGTCAGTTTGATTCCAAGTTTACACGTCAGACACCTGTCGACAGCCCAGATGA  
CTCAACTCTCAGTGAAAGTGCCAATCAGGTCTTTCTGGGTTTTACATATGTGGCTCCATCTGTACTTGAA  
AGTGTGAAAGAAAAGTTTTCTTTGAACCAAAAATCCGATCACCTCGAAGATTTATTGGCAGCCCACGAA  
CACCTGTCAGCCCAGTCAAATTTCTCCTGGGGATTTCTGGGGAAGAGGTGCTTCGGCCAGCACAGCAAA  
TCCTCAGACACCTGTGGAATACCAATGGAAACAAGTGGCATAGAGCAGATGGATGTGACAATGAGTGGG

GAAGCATCGGCACCACTTCCAATACGACAGCCGAAGCTCTGGGCCATACAAAAACAAGCTTTTCCCATGA  
TCTCCAAACGGCCAGAGCACCTGCGTATGAATCTATGA

>|cl|NM\_020761.3\_cds\_NP\_065812.1\_1 [gene=RPTOR] [db\_xref=CCDS:CCDS11773.1]  
[protein=regulatory-associated protein of mTOR isoform 1] [protein\_id=NP\_065812.1]  
[location=793..4800] [gbkey=CDS]

ATGGAGTCCGAAATGCTGCAATCGCCTCTTCTGGGCCTGGGGGAGGAAGATGAGGCTGATCTTACAGACT  
GGAACCTACCTTTGGCTTTTATGAAAAAGAGGCACTGTGAGAAAATTGAAGGCTCCAAATCCTTAGCTCA  
GAGCTGGAGGATGAAGGATCGGATGAAGACAGTCAGTGTTGCCTTAGTTTTGTGCCTGAATGTTGGTGTG  
GACCCTCCCGATGTGGTGAAGACCACGCCCTGTGCACGCTTGAATGCTGGATCGATCCTCTGTCTGATGG  
GTCCTCAGAAAGCTCTGGAACCATCGGTGCAAATTTACAGAAGCAGTACGAGAACTGGCAGCCAAGGGC  
CCGGTACAAGCAGAGCCTTGACCCAAGTGTGGATGAAGTCAAGAAGCTCTGCACGTCCTTACGTCGCAAC  
GCCAAGGAGGAGCGAGTCCTCTTTCACTACAATGGCCACGGGGTGCCCCGGCCACAGTCAACGGGGAGG  
TCTGGGTCTTCAACAAGAACTACACGCAGTACATCCCTCTGTCCATATATGACCTGCAGACGTGGATGGG  
CAGCCCGTCGATCTTCGTCTACGACTGCTCCAATGCTGGCTTGATCGTCAAGTCCTTCAAGCAGTTCGCA  
CTACAGCGGGAGCAGGAGCTGGAGGTAGCTGCAATCAACCCAAATCACCTCTTGCTCAGATGCCTTTGC  
CTCCGTCGATGAAAACTGCATCCAGCTGGCAGCCTGCGAGGCCACCGAGCTGCTGCCCATGATCCCCGA  
CCTCCCGGCTGACCTATTCACCTCCTGCCTACCAACCCCCATCAAGATCGCCCTGCGCTGGTTTTGCATG  
CAGAAATGTGTCAGTCTGGTGCCTGGCGTCACACTGGATTTGATAGAAAAGATCCCTGGCCGCCTGAACG  
ACAGGAGGACGCCCCTGGGTGAACTGAACTGGATCTTCACAGCCATCACAGACACCATCGCGTGGAACGT  
GCTCCCCGGGATCTCTTCCAAAAGCTCTTCAGACAGGACTTGCTGGTGGCTAGTCTGTTTCGAAATTTT  
TTATTGGCGGAAAGGATTATGAGGTGCTATAACTGCACTCCCGTCAGCAGCCCGCGTCTGCCGCCACGT  
ACATGCACGCCATGTGGCAAGCCTGGGACCTGGCTGTTGACATCTGTCTGTCTCAGCTGCCGACGATCAT

CGAGGAAGGCACTGCGTTTCGGCACAGCCCGTTCTTCGCCGAGCAGCTGACCGCATTCCAGGTGTGGCTC  
ACCATGGGCGTGAGAAACCGAAACCCACCCGAACAGCTGCCCATCGTCCTGCAGGTGCTGTTAAGCCAAG  
TGCACCGGCTGAGAGCATTGGACTTGCTTGGAAGATTTTTGGACCTGGGTCCCTGGGCAGTGAGCCTGGC  
CTTGTCTGTCGGCATCTTCCCCTACGTGCTGAAGCTGCTCCAGAGCTCGGCCCCGAGAGCTGCGGCCACTT  
CTCGTTTTCATCTGGGCCAAGATCCTCGCAGTGACAGCTCGTGCCAAGCGGACCTCGTGAAGGACAACG  
GCCACAAGTACTTCCTGTCGGTCCTGGCGGACCCCTACATGCCAGCTGAACACCGGACCATGACGGCTTT  
CATTCTCGCCGTGATCGTCAACAGCTATCACACGGGGCAGGAAGCCTGCCTTCAGGGAAACCTCATTGCC  
ATCTGCCTGGAGCAGCTCAACGACCCGCACCCCTTGCTGCGCCAGTGGGTGGCCATCTGCCTCGGCAGGA  
TCTGGCAGAACTTCGACTCGGCGAGGTGGTGCGGCGTGAGGGACAGCGCTCATGAGAAGCTCTACAGCCT  
CCTCTCCGACCCCATTCGAGGTCCGCTGCGCAGCGGTCTTCGCCCTTGGCACGTTCTGTGGGCAACTCT  
GCAGAGAGGACGGACCACTCCACCACCATCGACCACAACGTGGCCATGATGCTGGCCCAGCTGGTCAGCG  
ACGGGAGCCCCATGGTCCGGAAGGAGCTGGTGGTGGCTCTGAGTCATCTTGTTGAGTATGAAAGCAA  
TTTCTGCACCGTGGCCCTGCAGTTCATAGAAGAGGAAAAGAACTACGCCTTGCTTCTCCAGCAACCACA  
GAGGGAGGGAGTTTGACCCAGTGCGAGACAGCCCGTGACCCCCAGACTTCGTTCTGTGAGCTCCTATG  
GAAACATCCGTGCTGTGCGCCACAGCCAGGAGCCTCAACAAATCTTTGCAGAACCTGAGTTTGACAGAGGA  
ATCTGGTGGCGCGGTGGCGTTCTCCCCGGAAACCTCAGCACCAGCAGCAGCGCCAGCAGCACCTGGGC  
AGCCCCGAGAATGAGGAGCATATCCTGTCTTCGAGACCATCGACAAGATGCGCCGCGCCAGCTCCTACT  
CCTCCCTCAACTCCCTCATCGGAGTTTCTTTAACAGTGTTTACACTCAGATTTGGAGAGTCCTGCTGCA  
CCTGGCTGCTGACCCCTATCCAGAGGTCTCGGACGTGGCCATGAAAGTACTCAACAGCATCGCCTACAAG  
GCCACCGTGAACGCCCCGGCCGAGCGCGTCCTGGACACCTCCTCCCTCACGCAGTCGGCCCCCGCCAGCC  
CCACCAACAAGGGCGTGACATCCACCAGGCGGGGGGCTCCCCTCCGGCGTCCAGCACCAGCAGCTCCAG  
CCTGACCAACGATGTGGCCAAGCAGCCGGTCAGCCGAGACTTGCCTTCTGGCCGGCCGGGCACCACAGGC  
CCCGCTGGGGCGCAGTACACCCCTCACTCCACCAAGTTCCCCCGGACACGGAAGATGTTGACAAGGGCC  
CAGAGCAGACTGCGGACGACGCGGACGATGCTGCTGGACACAAAAGTTTCATCTCCGCCACGGTGCAGAC  
GGGGTTCTGCGACTGGAGCGCCCGCTATTTTGCCAGCCCGTCATGAAGATCCCAGAAGAGCACGACCTG

GAGAGTCAGATCCGCAAGGAGCGGGAGTGGCGGTTCTGCGAAACAGCCGTGTCAGGAGGCAGGCCCAGC  
AAGTCATTGAGAAAGGGCATTACGAGATTGGACGACCAAATATTTCTGAACAGGAACCCCGCGTCCCCTC  
TGTGGTGAAATTCCACCCCTTCACGCCGTGCATCGCCGTAGCCGACAAGGACAGCATCTGCTTTTGGGAC  
TGGGAGAAAGGGGAGAAGCTGGATTATTTCCACAATGGGAACCCTCGGTACACGAGGGTCACTGCCATGG  
AGTATCTGAACGGCCAGGACTGCTCGCTTCTGCTGACGGCCACAGACGATGGTGCCATCAGGGTCTGGAA  
GAATTTTGCTGATTTGGAAAAGAACCCAGAGATGGTGACCGCGTGGCAGGGGCTCTCGGACATGCTGCCA  
ACGACGCGAGGAGCTGGGATGGTGGTGGACTGGGAGCAGGAGACCGGCCTCCTCATGAGCTCAGGAGACG  
TGCGGATCGTCCGGATCTGGGACACAGACCGTGAGATGAAGGTGCAGGACATCCCTACGGGCGCAGACAG  
CTGTGTGACGAGTCTGTCCTGTGATTCCCACCGCTCACTCATCGTGGCTGGCCTCGGTGACGGCTCCATC  
CGCGTCTACGACAGAAGGATGGCACTCAGCGAATGCCGCGTCATGACGTACCGGGAGCACACAGCCTGGG  
TGGTGAAGGCCTCCCTGCAGAAGCGTCCCGACGGCCACATCGTGAGTGTGAGCGTCAATGGAGATGTGCG  
CATCTTTGATCCCCGGATGCCTGAGTCGGTAAATGTGCTTCAGATCGTGAAGGGGCTGACGGCCCTGGAC  
ATCCACCCCCAGGCGGACCTGATCGCATGTGGCTCCGTCAATCAGTTCACCGCCATCTACAACAGCAGCG  
GAGAGCTCATCAACAACATCAAGTACTACGACGGCTTCATGGGCCAGCGGGTCGGCGCCATCAGCTGCCT  
GGCCTTCCACCCGCACTGGCCTCACCTGGCCGTGGGAAGCAACGACTACTACATCTCCGTGTACTCGGTG  
GAGAAGCGTGTGTCAGATAG

>|cl|NM\_001145642.5\_cds\_NP\_001139114.1\_1 [gene=RUBCN] [db\_xref=CCDS:CCDS46987.1]  
[protein=run domain Beclin-1-interacting and cysteine-rich domain-containing protein isoform 1]  
[protein\_id=NP\_001139114.1] [location=668..3451] [gbkey=CDS]

ATGCAGAGCATCCTCTATCACGGGCTTATCCGTGACCAGGCGTGCCGCCGCCAGACGGATTACTGGCAGT  
TCGTGAAAGACATCCGGTGGCTCAGTCCCCACTCAGCCCTTCACGTGGAGAAGTTCATCAGCGTGCACGA  
GAACGACCAGAGCAGTGCTGATGGTGCCAGTGAACGTGCTGTTGCCGAGCTGTGGCTGCAGCACAGCCTG

CAGTACCACTGCCTCTCAGCCCAGCTCCGGCCCCCTGCTCGGGGATAGACAGTATATCAGAAAATTCTACA  
CAGATGCTGCCTTCTGCTAAGTGACGCTCATGTACGGCCATGCTGCAGTGCCTGGAAGCAGTGGAACA  
GAACAACCCCCGCTCCTGGCTCAGATCGATGCGTCCATGTTTGCCAGAAAGCACGAGAGCCCCGCTCCTG  
GTGACAAAGAGCCAGAGCCTGACAGCCCTGCCAGTTCCACATACACCCCTCCAAACAGCTATGCTCAGC  
ATTCCTACTTTGGGTCCTTCTCTAGCCTCCACCAATCCGTGCCCAACAATGGCTCAGAGAGAAGATCTAC  
TTCCTTTCCACTCTCTGGCCCTCCCCGGAAACCTCAAGAAAGCAGAGGGCACGTCTCACCAGCAGAGGAT  
CAAACCATCCAAGCCCCCCCAGTTTCAGTCTCTGCACTAGCCAGGGATTCCCCTTTGACCCCAAATGAAA  
TGAGCTCCAGTACTCTGACCAGCCCCATAGAGGCATCCTGGGTCAGCAGCCAGAATGATTCCCAGGTGA  
TGCCAGTGAGGGGCCTGAGTACCTGGCCATTGGCAACTTGGACCCCCGAGGCCGGACTGCCAGCTGTCAG  
AGTCACAGCAGCAATGCCGAGAGCAGCAGTTCCAATTTGTTCTCCTCCAGCAGCTCCCAGAAGCCAGATT  
CTGCTGCCTCTTCCTTAGGGGACCAGGAAGGAGGTGGGGAGAGCCAGCTGTCCAGTGTCTCCGCAGGTC  
CAGCTTCTCAGAGGGGCAGACACTCACTGTCACCAGTGGGGCAAAGAAAAGCCACATTGCTCCCATTCG  
GATACCAGCATTGCCTCCAGGGGAGCTCCAGGAGGCCCCAGGAATATCACCATTATAGTTGAAGATCCCA  
TTGCAGAATCCTGCAATGATAAGGCGAAGTTGAGAGGCCCTTTGCCCTACTCTGGTCAAAGCAGTGAAGT  
CAGCACACCCAGCTCTCTGTACATGGAATATGAAGGTGGTCGGTACCTGTGCTCAGGGGAAGGCATGTTT  
CGAAGACCATCAGAAGGACAGTCCCTCATCAGCTACCTCTCTGAGCAAGACTTCGGCAGCTGTGCCGACC  
TGGAAGAGGAGAATGCCCACTTCAGCATCTCAGAGTCCTTAATTGCTGCCATCGAGCTAATGAAGTGCAA  
CATGATGAGCCAGTGCCTAGAGGAGGAGGAAGTGGAAGAGGAAGACAGTGATAGAGAGATCCAGGAGCTG  
AAGCAGAAGATCCGCCTTCGGCGCCAGCAAATCCGCACCAAGAACCTGCTCCCCATGTACCAGGAGGCTG  
AGCACGGAAGCTTTCGGGTACCTCCAGCAGCTCCAGTTTCACTCACGTGATTCCGGCACAGCTCTCTGA  
CTCTGGCTCTGCTGATGAGGTTGATGAATTTGAAATCCAAGATGCTGACATCAGAAGGAACACAGCCTCA  
AGCAGCAAATCCTTCGTTTCCTCCAGTCCTTCTCCCACTGCTTCTGCACTCCACGTCTGCTGAGGCGG  
TGGCCATGGGGCTCCTGAAGCAGTTTGAGGGGATGCAGCTTCCAGCCGCCTCGGAGCTGGAGTGGCTTGT  
CCCGGAGCATGATGCCCTCAGAAGCTCCTGCCATTCTGACTCACTGCCCATCTCACCAGGATGACGGG  
CAGCACGCTGACATCTACAAGCTGCGGATTCGTGTTCTGGCAACTTGGAGTGGGCCCCGCCCCGGCCTC

AGATAATTTTAAATGTTTCATCCAGCCCCAACGAGGAAAAATTGCCGTGGCCAAGCAGAATTACCGCTGTGC  
AGGATGTGGCATCCGGACTGACCCTGATTACATCAAGCGACTGCGGTACTGTGAGTACCTGGGCAAGTAC  
TTCTGCCAGTGCTGCCACGAGAATGCCAGATGGCCATCCCCAGCCGGGTTCTGCGCAAGTGGGACTTCA  
GCAAGTACTACGTCAGCAACTTCTCCAAGGACCTGCTCATTAAGATCTGGAATGATCCTCTCTTCAACGT  
GCAGGACATAAACAGTGCCCTCTATAGGAAGGTCAAGCTGCTCAATCAAGTCCGGCTGCTGCGGGTCCAG  
CTGTGTCACATGAAGAACATGTTCAAGACTTGCCGACTGGCCAAGGAGCTTCTGGATTCTTTGACACAG  
TCCCAGGCCACCTGACAGAGGACCTCCACCTGTACTCACTGAATGACCTGACTGCGACCAGGAAGGGGGA  
GCTGGGGCCCCGGCTTGCTGAGCTCACCAGGGCAGGGGCTACCCATGTGGAGAGATGCATGCTCTGCCAA  
GCCAAAGGCTTCATCTGTGAGTTCTGTCAGAATGAGGATGACATCATCTTCCCTTTGAGCTCCATAAGT  
GCCGGACCTGTGAAGAGTGTAAGCGTGTTACCATAAAGCCTGCTTCAAGTCTGGAAGCTGTCCGCGCTG  
CGAGCGGCTGCAGGCCCGCGGGAGGCACTGGCCAGGCAGAGCCTGGAGTCTTACCTGTCAGACTACGAG  
GAGGAGCCCGCGGAAGCGCTGGCCCTGGAAGCCGCGTCCTGGAGGCCACCTGA

>|cl|NM\_001142648.2\_cds\_NP\_001136120.1\_1 [gene=SAR1A] [db\_xref=CCDS:CCDS7298.1]  
[protein=GTP-binding protein SAR1a] [protein\_id=NP\_001136120.1] [location=189..785] [gbkey=CDS]

ATGTCTTTCATCTTTGAGTGGATCTACAATGGCTTCAGCAGTGTGCTCCAGTTCCTAGGACTGTACAAGA  
AATCTGGAAAACCTGTATTCTTAGGTTTGGATAATGCAGGCAAAACCACTCTTCTTCACATGCTCAAAGA  
TGACAGATTGGGCCAACATGTTCCAACACTACATCCGACATCAGAAGAGCTAACAATTGCTGGAATGACC  
TTTACAACTTTTGATCTTGGTGGGCACGAGCAAGCACGTCGCGTTTGGAAAAATTATCTCCAGCAATTA  
ATGGGATTGTCTTCTGGTGGACTGTGCAGATCATTCTCGCCTCGTGGAATCCAAAGTTGAGCTTAATGC  
TTTAATGACTGATGAAACAATATCCAATGTGCCAATCCTTATCTTGGGTAACAAAATTGACAGAACAGAT  
GCAATCAGTGAAGAAAACTCCGTGAGATATTTGGGCTTTATGGACAGACCACAGGAAAGGGGAATGTGA  
CCCTGAAGGAGCTGAATGCTCGCCCCATGGAAGTGTTTCATGTGCAGTGTGCTCAAGAGGCAAGGTTACGG

CGAGGGTTTCCGCTGGCTCTCCCAGTATATTGACTGA

>|cl|NM\_001002235.3\_cds\_NP\_001002235.1\_1 [gene=SERPINA1] [db\_xref=CCDS:CCDS9925.1]  
[protein=alpha-1-antitrypsin precursor] [protein\_id=NP\_001002235.1] [location=184..1440]  
[gbkey=CDS]

ATGCCGTCTTCTGTCTCGTGGGGCATCCTCCTGCTGGCAGGCCTGTGCTGCCTGGTCCCTGTCTCCCTGG  
CTGAGGATCCCCAGGGAGATGCTGCCCAGAAGACAGATACATCCCACCATGATCAGGATCACCCAACCTT  
CAACAAGATCACCCCCAACCTGGCTGAGTTCGCCTTCAGCCTATACCGCCAGCTGGCACACCAGTCCAAC  
AGCACCAATATCTTCTTCTCCCCAGTGAGCATCGCTACAGCCTTTGCAATGCTCTCCCTGGGGACCAAGG  
CTGACACTCACGATGAAATCCTGGAGGGCCTGAATTTCAACCTCACGGAGATTCCGGAGGCTCAGATCCA  
TGAAGGCTTCAGGAACTCCTCCGTACCCTCAACCAGCCAGACAGCCAGCTCCAGCTGACCACCGGCAAT  
GGCCTGTTCTCAGCGAGGGCCTGAAGCTAGTGGATAAGTTTTTGGAGGATGTTAAAAAGTTGTACCACT  
CAGAAGCCTTCACTGTCAACTTCGGGGACACCGAAGAGGCCAAGAAACAGATCAACGATTACGTGGAGAA  
GGGTACTCAAGGGAAAAATTGTGGATTTGGTCAAGGAGCTTGACAGAGACACAGTTTTTGTCTGCTGGTGAAT  
TACATCTTCTTTAAAGGCAAATGGGAGAGACCCTTTGAAGTCAAGGACACCGAGGAAGAGGACTTCCACG  
TGGACCAGGTGACCACCGTGAAGGTGCCTATGATGAAGCGTTTAGGCATGTTTAACATCCAGCACTGTAA  
GAAGCTGTCCAGCTGGGTGCTGCTGATGAAATACCTGGGCAATGCCACCGCCATCTTCTTCTGCCTGAT  
GAGGGGAAACTACAGCACCTGGAAAATGAACTACCCACGATATCATCACCAAGTTCCTGGAAAATGAAG  
ACAGAAGGTCTGCCAGCTTACATTTACCCAAACTGTCCATTACTGGAACCTATGATCTGAAGAGCGTCCT  
GGGTCAACTGGGCATCACTAAGGTCTTCAGCAATGGGGCTGACCTCTCCGGGGTCACAGAGGAGGCACCC  
CTGAAGCTCTCCAAGGCCGTGCATAAGGCTGTGCTGACCATCGACGAGAAAGGGACTGAAGCTGCTGGGG  
CCATGTTTTTAGAGGCCATACCCATGTCTATCCCCCGAGGTCAAGTTCAACAAACCCTTTGTCTTCTT  
AATGATTGAACAAAATACCAAGTCTCCCCTCTTCATGGGAAAAGTGGTGAATCCCACCCAAAAATAA

>|cl|NM\_031459.5\_cds\_NP\_113647.1\_1 [gene=SESN2] [db\_xref=CCDS:CCDS321.1] [protein=sestrin-2]  
[protein\_id=NP\_113647.1] [location=331..1773] [gbkey=CDS]

ATGATCGTGGCGGACTCCGAGTGCCGCGCAGAGCTCAAGGACTACCTGCGGTTGCCCCGGGCGGCGTCG  
GCGACTCGGGCCCCGGAGAGGAGCAGAGGGAGAGCCGGGCTCGGCGAGGCCCTCGAGGGCCCAGCGCCTT  
CATCCCCGTGGAGGAGGTCTTCGGGAGGGGGCTGAGAGCCTCGAGCAGCACCTGGGGCTGGAGGCACTG  
ATGTCCTCTGGGCGAGTAGACAACCTGGCAGTGGTGATGGGCCTGCACCCTGACTACTTTACCAGCTTCT  
GGCGCCTGCACTACCTGCTGCTGCACACGGATGGTCCCTTGGCCAGCTCCTGGCGCCACTACATTGCCAT  
CATGGGTGCCGCCCCGCCATCAGTGTTCTTACCTGGTAGGCTCCACATGGCCGAGTTTCTGCAGACTGGT  
GGTGACCCTGAGTGGCTGCTGGGCCTCCACCGGGCCCCCGAGAAGCTGCGCAAACCTCAGCGAGATCAACA  
AGTTGCTGGCGCATCGGCCATGGCTCATCACCAAGGAACACATCCAGGCCTTGCTGAAGACCGGCGAGCA  
CACTTGGTCCCTGGCCGAGCTCATTCAGGCTCTGGTCTGCTCACCCACTGCCACTCGCTCTCCTCCTTC  
GTGTTTGGCTGTGGCATCCTCCCTGAGGGGGATGCAGATGGCAGCCCTGCCCCCAGGCACCTACACCCC  
CTAGTGAACAGAGCAGCCCCCAAGCAGGGACCCGTTGAACAACTCTGGGGGCTTTGAGTCTGCCCGCGA  
CGTGGAGGCGCTGATGGAGCGCATGCAGCAGCTGCAGGAGAGCCTGCTGCGGGATGAGGGGACGTCCCAG  
GAGGAGATGGAGAGCCGCTTTGAGCTGGAGAAGTCAGAGAGCCTGCTGGTGACCCCCTCAGCTGACATCC  
TGGAGCCCTCTCCACACCCAGACATGCTGTGCTTTGTGGAAGACCCTACTTTCGGATATGAGGACTTCAC  
TCGGAGAGGGGCTCAGGCACCCCCTACCTTCCGGGCCCAGGATTATACCTGGGAAGACCATGGCTACTCG  
CTGATCCAGCGGCTTTACCCTGAGGGTGGGCAGCTGCTGGATGAGAAGTTCCAGGCAGCCTATAGCCTCA  
CCTACAATACCATCGCCATGCACAGTGGTGTGGACACCTCCGTGCTCCGCAGGGCCATCTGGAATATAT  
CCACTGCGTCTTTGGCATCAGATATGATGACTATGATTATGGGGAGGTGAACCAGCTCCTGGAGCGGAAC  
CTCAAGGTCTATATCAAGACAGTGGCCTGCTACCCAGAGAAGACCACCCGAAGAATGTACAACCTCTTCT  
GGAGGCACTTCCGCCACTCAGAGAAGGTCCACGTGAACTTGCTGCTCCTGGAGGCGCGCATGCAAGCCGC

TCTGCTGTACGCCCTCCGTGCCATCACCCGCTACATGACCTGA

>|cl|NM\_016009.5\_cds\_NP\_057093.1\_1 [gene=SH3GLB1] [db\_xref=CCDS:CCDS710.1]  
[protein=endophilin-B1 isoform 1] [protein\_id=NP\_057093.1] [location=325..1422] [gbkey=CDS]  
ATGAATATCATGGACTTCAACGTGAAGAAGCTGGCGGCCGACGCAGGCACCTTCCTCAGTCGCGCCGTGC  
AGTTCACAGAAGAAAAGCTTGGCCAGGCTGAGAAGACAGAATTGGATGCTCACTTAGAGAACCTCCTTAG  
CAAAGCTGAATGTACCAAAATATGGACAGAAAAAATAATGAAACAACTGAAGTGTTATTGCAGCCAAAT  
CCAAATGCCAGGATAGAAGAATTTGTTTATGAGAACTGGATAGAAAAGCTCCAAGTCGTATAAAACAACC  
CAGAACTTTTGGGACAATATATGATTGATGCAGGGACTGAGTTTGGCCCAGGAACAGCTTATGGTAATGC  
CCTTATTAAATGTGGAGAAACCCAAAAAAGAATTGGAACAGCAGACAGAGAACTGATTCAAACGTCAGCC  
TTAAATTTTCTTACTCCTTTAAGAACTTTATAGAAGGAGATTACAAAACAATTGCTAAAGAAAGGAAAC  
TATTGCAAAATAAGAGACTGGATTTGGATGCTGCAAAAACGAGACTAAAAAAGGCAAAAGCTGCAGAAAC  
TAGAAATTCATCTGAACAGGAATTAAGAATAACTCAAAGTGAATTTGATCGTCAAGCAGAGATTACCAGA  
CTTCTGCTAGAGGGAATCAGCAGTACACATGCCATCACCTTCGCTGTCTGAATGACTTTGTAGAAGCCC  
AGATGACTTACTATGCACAGTGTTACCAGTATATGTTGGACCTCCAGAAACAACTGGGAAGTTTTCCATC  
CAATTATCTTAGTAACAACAATCAGACTTCTGTGACACCTGTACCATCAGTTTTACCAAATGCGATTGGT  
TCTTCTGCCATGGCTTCAACAAGTGGCCTAGTAATCACCTCTCCTTCCAACCTCAGTGACCTTAAGGAGT  
GTAGTGGCAGCAGAAAGGCCAGGGTTCTCTATGATTATGATGCAGCAAACAGTACTGAATTATCACTTCT  
GGCAGATGAGGTGATCACTGTGTTTCAAGTGTGTTGGAATGGATTCAGACTGGCTAATGGGGGAAAGGGGA  
AACCAGAAGGGCAAGGTGCCAATTACCTACTTAGAACTGCTCAATTAA

>|cl|NM\_012238.5\_cds\_NP\_036370.2\_1 [gene=SIRT1] [db\_xref=CCDS:CCDS7273.1] [protein=NAD-dependent protein deacetylase sirtuin-1 isoform a] [protein\_id=NP\_036370.2] [location=67..2310] [gbkey=CDS]

ATGGCGGACGAGGCGGCCCTCGCCCTCAGCCCGCGGCTCCCCCTCGGCGGCGGGGGCCGACAGGGAGG  
CCGCGTCGTCCCCCGCGGGGAGCCGCTCCGCAAGAGGCCGCGGAGAGATGGTCCCGGCCTCGAGCGGAG  
CCCGGGCGAGCCCGGTGGGGCGGCCCCAGAGCGTGAGGTGCCGGCGGCGGCCAGGGGCTGCCCGGTGCG  
GCGGCGGCGGCGCTGTGGCGGGAGGCGGAGGCAGAGGCGGCGGCGGCAGGCGGGGAGCAAGAGGCCCAGG  
CGACTGCGGCGGCTGGGAAGGAGACAATGGGCCGGGCCTGCAGGGCCCATCTCGGGAGCCACCGCTGGC  
CGACAACCTGTACGACGAAGACGACGACGACGAGGGCGAGGAGGAGGAAGAGGCGGCGGCGGCGGCGATT  
GGGTACCGAGATAACCTTCTGTTCCGTGATGAAATTATCACTAATGGTTTTATTCTGTGAAAGTGATG  
AGGAGGATAGAGCCTCACATGCAAGCTCTAGTGACTGGACTCCAAGGCCACGGATAGGTCCATATACTTT  
TGTTCAACAACATCTTATGATTGGCACAGATCCTCGAACAATTCTTAAAGATTTATTGCCGGAACAATA  
CCTCCACCTGAGTTGGATGATATGACACTGTGGCAGATTGTTATTAATATCCTTTCAGAACCACCAAAAA  
GGAAAAAAGAAAAGATATTAATACAATTGAAGATGCTGTGAAATTACTGCAAGAGTGCAAAAAAATTAT  
AGTTCTAACTGGAGCTGGGGTGTCTGTTTCATGTGGAATACCTGACTTCAGGTCAAGGGATGGTATTTAT  
GCTCGCCTTGCTGTAGACTTCCCAGATCTTCAGATCCTCAAGCGATGTTTGATATTGAATATTTAGAA  
AAGATCCAAGACCATTCTTCAAGTTTGCAAAGGAAATATATCCTGGACAATTCAGCCATCTCTGTCA  
CAAATTCATAGCCTTGTCAGATAAGGAAGGAAAATACTTCGCAACTATACCCAGAACATAGACACGCTG  
GAACAGGTTGCGGGAATCCAAAGGATAATTCAGTGTGATGGTTCCTTTGCAACAGCATCTTGCCTGATTT  
GTAAATACAAAGTTGACTGTGAAGCTGTACGAGGAGATATTTTAAATCAGGTAGTTCCTCGATGTCCTAG  
GTGCCAGCTGATGAACCGCTTGCTATCATGAAACCAGAGATTGTGTTTTTGGTGAAAATTTACCAGAA  
CAGTTTCATAGAGCCATGAAGTATGACAAAGATGAAGTTGACCTCCTCATTGTTATTGGGTCTTCCCTCA  
AAGTAAGACCAGTAGCACTAATTCGAAGTTCCATACCCCATGAAGTGCCTCAGATATTAATTAATAGAGA  
ACCTTTGCCTCATCTGCATTTTGATGTAGAGCTTCTTGGAGACTGTGATGTCATAATTAATGAATTGTGT  
CATAGGTTAGGTGGTGAATATGCCAACTTTGCTGTAACCCTGTAAAGCTTTCAGAAATTAAGTAAAAAC

CTCCACGAACACAAAAAGAATTGGCTTATTTGTCAGAGTTGCCACCCACACCTCTTCATGTTTCAGAAGA  
CTCAAGTTCACCAGAAAGAACTTCACCACCAGATTCTTCAGTGATTGTCACACTTTTAGACCAAGCAGCT  
AAGAGTAATGATGATTTAGATGTGTCTGAATCAAAAGGTTGTATGGAAGAAAAACCACAGGAAGTACAAA  
CTTCTAGGAATGTTGAAAGTATTGCTGAACAGATGGAAAATCCGGATTTGAAGAATGTTGGTTCTAGTAC  
TGGGGAGAAAAATGAAAGAACTTCAGTGGCTGGAACAGTGAGAAAATGCTGGCCTAATAGAGTGGCAAAG  
GAGCAGATTAGTAGGCGGCTTGATGGTAATCAGTATCTGTTTTTGCCACCAAATCGTTACATTTTCCATG  
GCGCTGAGGTATATTCAGACTCTGAAGATGACGTCTTATCCTCTAGTTCTTGTGGCAGTAACAGTGATAG  
TGGGACATGCCAGAGTCCAAGTTTAGAAGAACCCATGGAGGATGAAAGTGAAATTGAAGAATTCTACAAT  
GGCTTAGAAGATGAGCCTGATGTTCCAGAGAGAGCTGGAGGAGCTGGATTTGGGACTGATGGAGATGATC  
AAGAGGCAATTAATGAAGCTATATCTGTGAAACAGGAAGTAACAGACATGAACTATCCATCAAACAAATC  
ATAG

>|cl|NM\_001193286.2\_cds\_NP\_001180215.1\_1 [gene=SIRT2] [db\_xref=CCDS:CCDS74361.1]  
[protein=NAD-dependent protein deacetylase sirtuin-2 isoform 3] [protein\_id=NP\_001180215.1]  
[location=162..866] [gbkey=CDS]

ATGGACTTCCTGCGGAACCTATTCTCCAGACGCTCAGCCTGGGCAGCCAGAAGGAGCGTCTGCTGGACG  
AGCTGACCTTGGAAGGGGTGGCCCGGTACATGCAGAGCGAACGCTGTGCGAGAGTCATCTGTTTGGTGGG  
AGCTGGAATCTCCACATCCGCAGGCATCCCCGACTTTCGCTCTCCATCCACCGGCCTCTATGACAACCTA  
GAGAAGTACCATCTTCCCTACCCAGAGGCCATCTTTGAGATCAGCTATTTCAAGAAACATCCGGAACCCCT  
TCTTCGCCCTCGCCAAGGAACTCTATCCTGGGCAGTTCAAGCCAACCATCTGTCACTACTTCATGCGCCT  
GCTGAAGGACAAGGGGCTACTCCTGCGCTGCTACACGCAGAACATAGATACCCTGGAGCGAATAGCCGGG  
CTGGAACAGGAGGACTTGGTGGAGGCGCACGGCACCTTCTACACATCACACTGCGTCAGCGCCAGCTGCC  
GGCACGAATACCCGCTAAGCTGGATGAAAGAGAAGATCTTCTCTGAGGTGACGCCCAAGTGTGAAGACTG

TCAGAGCCTGGTGAAGCCTGATATCGTCTTTTTTGGTGAGAGCCTCCCAGCGCGTTTCTTCTCCTGTATG  
CAGTCAGACTTCCTGAAGGTGGACCTCCTCCTGGTCATGGGTACCTCCTTGCAGGGACGTGGCCTGGCTG  
GGTGA

>|cl|NM\_182965.3\_cds\_NP\_892010.2\_1 [gene=SPHK1] [db\_xref=CCDS:CCDS11744.1]  
[protein=sphingosine kinase 1 isoform 2] [protein\_id=NP\_892010.2] [location=498..1910] [gbkey=CDS]

ATGTCCGCTCAAGTTCTGGGATTTTTACGCAGCTGGACTCCCCTCCCCTGGCAGCCCCGAGGGGTCCAG  
CCGCCGCAGGGAATGACGCCGGTGCTCCTGCAGCCACGGCTCCGGGCGGGGAAGGCGAGCCCCACAGCCG  
GCCCTGCGACGCCCGCCTGGGCAGCACCGATAAGGAGCTGAAGGCAGGAGCCGCCACGGGCAGCGCC  
CCCACAGCGCCAGGGACCCCCTGGCAGCGGGAGCCGCGGGTCGAGGTTATGGATCCAGCGGGCGGCCCCC  
GGGGCGTGCTCCCGCGGCCCTGCCGCGTGCTGGTGCTGCTGAACCCGCGCGGGCGGCAAGGGCAAGGCCTT  
GCAGCTCTCCGGAGTCACGTGCAGCCCCCTTTGGCTGAGGCTGAAATCTCCTTCACGCTGATGCTCACT  
GAGCGGCGGAACCACGCGCGGGAGCTGGTGCGGTCGGAGGAGCTGGGCCGCTGGGACGCTCTGGTGGTCA  
TGTCTGGAGACGGGCTGATGCACGAGGTGGTGAACGGGCTCATGGAGCGGCCTGACTGGGAGACCGCCAT  
CCAGAAGCCCCTGTGTAGCCTCCCAGCAGGCTCTGGCAACGCGCTGGCAGCTTCCTTGAACCATTATGCT  
GGCTATGAGCAGGTCACCAATGAAGACCTCCTGACCAACTGCACGCTATTGCTGTGCCGCGGCTGCTGT  
CACCCATGAACCTGCTGTCTCTGCACACGGCTTCGGGGCTGCGCCTCTTCTCTGTGCTCAGCCTGGCCTG  
GGGCTTCATTGCTGATGTGGACCTAGAGAGTGAGAAGTATCGGCGTCTGGGGGAGATGCGCTTCACTCTG  
GGCACCTTCCTGCGTCTGGCAGCCCTGCGCACCTACCGCGGCCGACTGGCCTACCTCCCTGTAGGAAGAG  
TGGGTTCCAAGACACCTGCCTCCCCGTTGTGGTCCAGCAGGGCCCGGTAGATGCACACCTTGTGCCACT  
GGAGGAGCCAGTGCCCTCTCACTGGACAGTGGTGCCCGACGAGGACTTTGTGCTAGTCCTGGCACTGCTG  
CACTCGCACCTGGGCAGTGAGATGTTTGCTGCACCCATGGGCCGCTGTGCAGCTGGCGTCATGCATCTGT  
TCTACGTGCGGGCGGGAGTGTCTCGTGCCATGCTGCTGCGCCTCTCCTGGCCATGGAGAAGGGCAGGCA

TATGGAGTATGAATGCCCCTACTTGGTATATGTGCCCGTGGTCGCCTTCCGCTTGGAGCCCAAGGATGGG  
AAAGGTGTGTTTGCAGTGGATGGGGAATTGATGGTTAGCGAGGCCGTGCAGGGCCAGGTGCACCCAACT  
ACTTCTGGATGGTCAGCGGTTGCGTGGAGCCCCCGCCAGCTGGAAGCCCCAGCAGATGCCACCGCCAGA  
AGAGCCCTTATGA

>|cl|NM\_032038.3\_cds\_NP\_114427.1\_1 [gene=SPNS1] [db\_xref=CCDS:CCDS10646.1] [protein=protein  
spinster homolog 1 isoform 1] [protein\_id=NP\_114427.1] [location=375..1961] [gbkey=CDS]

ATGGCCGGGTCCGACACCGCGCCCTTCTCAGCCAGGCGGATGACCCGGACGACGGGCCAGTGCCTGGCA  
CCCCGGGGTTGCCAGGGTCCACGGGGAACCCGAAGTCCGAGGAGCCCGAGGTCCCGGACCAGGAGGGGGCT  
GCAGCGCATCACCGCCTGTCTCCCGGCCGTTGCGCTCTCATAGTGGCGGTGCTGTGCTACATCAATCTC  
CTGAACTACATGGACCGCTTACCGTGGCTGGCGTCCTCCCGACATCGAGCAGTTCTTCAACATCGGGG  
ACAGTAGCTCTGGGCTCATCCAGACCGTGTTTCATCTCCAGTTACATGGTGTTGGCACCTGTGTTTGGCTA  
CCTGGGTGACAGGTACAATCGGAAGTATCTCATGTGCGGGGGCATTGCCTTCTGGTCCCTGGTGACACTG  
GGGTATCCTTCATCCCCGGAGAGCATTCTGGCTGCTCCTCTGACCCGGGGCCTGGTGGGGGTGCGGG  
AGGCCAGTTATTCCACCATCGCGCCCACTCTCATTGCCGACCTCTTTGTGGCCGACCAGCGGAGCCGGAT  
GCTCAGCATCTTCTACTTTGCCATTCCGGTGGGCAGTGGTCTGGGCTACATTGCAGGCTCCAAAGTGAAG  
GATATGGCTGGAGACTGGCACTGGGCTCTGAGGGTGACACCGGGTCTAGGAGTGGTGGCCGTTCTGCTGC  
TGTTCTGGTAGTGCGGGAGCCGCCAAGGGGAGCCGTGGAGCGCCACTCAGATTTGCCACCCCTGAACCC  
CACCTCGTGGTGGGCAGATCTGAGGGCTCTGGCAAGAAATCCTAGTTTCGTCCTGTCTTCCCTGGGCTTC  
ACTGCTGTGGCCTTTGTACGGGGCTCCCTGGCTCTGTGGGCTCCGGCATTCTGCTGCGTTCCCGCGTGG  
TCCTTGGGGAGACCCACCCCTGCCTTCCCGGAGACTCCTGCTCTTCTCTGACAGTCTCATCTTTGGA  
CATCACCTGCCTGACCGGAGTCCTGGGTGTGGGCCTGGGTGTGGAGATCAGCCGCCGGCTCCGCCACTCC  
AACCCCCGGGCTGATCCCCTGGTCTGTGCCACTGGCCTCCTGGGCTCTGCACCCTTCTCTTCTGTCCC

TTGCCTGCGCCCGTGGTAGCATCGTGGCCACTTATATTTTCATCTTCATTGGAGAGACCCTCCTGTCCAT  
GAACTGGGCCATCGTGGCCGACATTCTGCTGTACGTGGTGATCCCTACCCGACGCTCCACCGCCGAGGCC  
TTCCAGATCGTGCTGTCCACCTGCTGGGTGATGCTGGGAGCCCCTACCTCATTGGCCTGATCTCTGACC  
GCCTGCGCCGGAAGTGGCCCCCTCCTTCTGTCCGAGTTCGGGGCTCTGCAGTTCTCGCTCATGCTCTG  
CGCGTTTGTTGGGGCACTGGGCGGCGCAGCCTTCCTGGGCACCGCCATCTTCATTGAGGCCGACCGCCGG  
CGGGCACAGCTGCACGTGCAGGGCCTGCTGCACGAAGCAGGGTCCACAGACGACCGGATTGTGGTGCCCC  
AGCGGGGCCGCTCCACCCGCGTGCCCGTGGCCAGTGTGCTCATCTGA

>|cl|NM\_001142298.2\_cds\_NP\_001135770.1\_1 [gene=SQSTM1] [db\_xref=CCDS:CCDS47355.1]  
[protein=sequestosome-1 isoform 2] [protein\_id=NP\_001135770.1] [location=356..1426] [gbkey=CDS]

ATGGCCATGTCCTACGTGAAGGATGACATCTTCCGAATCTACATTAAAGAGAAAAAAGAGTGCCGGCGGG  
ACCACCGCCCACCGTGTGCTCAGGAGGCGCCCCGCAACATGGTGCACCCCAATGTGATCTGCGATGGCTG  
CAATGGGCCTGTGGTAGGAACCCGCTACAAGTGCAGCGTCTGCCCAGACTACGACTTGTTAGCGTCTGC  
GAGGGAAAGGGCTTGACCGGGGGGCACACCAAGCTCGCATTCCCCAGCCCCTTCGGGCACCTGTCTGAGG  
GCTTCTGCACAGCCGCTGGCTCCGGAAGGTGAAACACGGACACTTCGGGTGGCCAGGATGGGAAATGGG  
TCCACCAGGAACTGGAGCCACGTCCTCCTCGTGCAGGGGAGGCCCGCCCTGGCCCCACGGCAGAATCA  
GCTTCTGGTCCATCGGAGGATCCGAGTGTGAATTTCTGAAGAACGTTGGGGAGAGTGTGGCAGCTGCCC  
TTAGCCCTCTGGGCATTGAAGTTGATATCGATGTGGAGCACGGAGGGAAAAGAAGCCGCCTGACCCCCGT  
CTCTCCAGAGAGTTCCAGCACAGAGGAGAAGAGCAGCTCACAGCCAAGCAGCTGCTGCTCTGACCCAGC  
AAGCCGGGTGGGAATGTTGAGGGCGCCACGCAGTCTCTGGCGGAGCAGATGAGGAAGATCGCCTTGAGT  
CCGAGGGGCGCCCTGAGGAACAGATGGAGTCGGATAACTGTTTCAGGAGGAGATGATGACTGGACCCATCT  
GTCTTCAAAGAAGTGGACCCGTCTACAGGTGAACTCCAGTCCCTACAGATGCCAGAATCCGAAGGGCCA  
AGCTCTCTGGACCCCTCCCAGGAGGGACCCACAGGGCTGAAGGAAGCTGCCTTGATCCACATCTCCCGC

CAGAGGCTGACCCGCGGCTGATTGAGTCCCTCTCCAGATGCTGTCCATGGGCTTCTCTGATGAAGGCGG  
CTGGCTCACCAGGCTCCTGCAGACCAAGAACTATGACATCGGAGCGGCTCTGGACACCATCCAGTATTCA  
AAGCATCCCCGCGGTTGTGA

>|cl|NM\_003932.5\_cds\_NP\_003923.2\_1 [gene=ST13] [db\_xref=CCDS:CCDS14006.1] [protein=hsc70-  
interacting protein isoform 1] [protein\_id=NP\_003923.2] [location=100..1209] [gbkey=CDS]

ATGGACCCCCGCAAAGTGAACGAGCTTCGGGCCTTTGTGAAAATGTGTAAGCAGGATCCGAGCGTTCTGC  
ACACCGAGGAAATGCGCTTCCTGAGGGAGTGGGTGGAGAGCATGGGTGGTAAAGTACCACCTGCTACTCA  
GAAAGCTAAATCAGAAGAAAATACCAAGGAAGAAAAACCTGATAGTAAGAAGGTGGAGGAAGACTTAAAG  
GCAGACGAACCATCAAGTGAGGAAAGTGATCTAGAAATTGATAAAGAAGGTGTGATTGAACCAGACACTG  
ATGCTCCTCAAGAAATGGGAGATGAAAATGCGGAGATAACGGAGGAGATGATGGATCAGGCAAATGATAA  
AAAAGTGGCTGCTATTGAAGCCCTAAATGATGGTGAACCTCAGAAAGCCATTGACTTATTCACAGATGCC  
ATCAAGCTGAATCCTCGCTTGCCATTTTGTATGCCAAGAGGGCCAGTGTCTTCGTCAAATTACAGAAGC  
CAAATGCTGCCATCCGAGACTGTGACAGAGCCATTGAAATAAATCCTGATTGAGCTCAGCCTTACAAGTG  
GCGGGGGAAAGCACACAGACTTCTAGGCCACTGGGAAGAAGCAGCCCATGATCTTGCCCTTGCTGTAAA  
TTGGATTATGATGAAGATGCTAGTGCAATGCTGAAAGAAGTTCAACCTAGGGCACAGAAAATTGCAGAAC  
ATCGGAGAAAGTATGAGCGAAAACGTGAAGAGCGAGAGATCAAAGAAAGAATAGAACGAGTTAAGAAGGC  
TCGAGAAGAGCATGAGAGAGCCCAGAGGGAGGAAGAAGCCAGACGACAGTCAGGAGCTCAGTATGGCTCT  
TTTCCAGGTGGCTTTCCTGGGGGAATGCCTGGTAATTTCCCGGAGGAATGCCTGGAATGGGAGGGGGCA  
TGCCTGGAATGGCTGGAATGCCTGGACTCAATGAAATTCCTAGTGATCCAGAGGTTCTTGACCCATGCA  
GGATCCAGAAGTTATGGTGGCTTTCCAGGATGTGGCTCAGAACCCAGCAAATATGTCAAAATACCAGAGC  
AACCCAAAGGTTATGAATCTCATCAGTAAATTGTCAGCCAAATTTGGAGGTCAAGCGTAA

>|cl|NM\_000455.5\_cds\_NP\_000446.1\_1 [gene=STK11] [db\_xref=CCDS:CCDS45896.1]  
[protein=serine/threonine-protein kinase STK11 isoform 1] [protein\_id=NP\_000446.1]  
[location=1137..2438] [gbkey=CDS]

ATGGAGGTGGTGGACCCGCAGCAGCTGGGCATGTTACGGAGGGCGAGCTGATGTCGGTGGGTATGGACA  
CGTTCATCCACCGCATCGACTCCACCGAGGTCATCTACCAGCCGCGCCGCAAGCGGGCCAAGCTCATCGG  
CAAGTACCTGATGGGGGACCTGCTGGGGGAAGGCTCTTACGGCAAGGTGAAGGAGGTGCTGGACTCGGAG  
ACGCTGTGCAGGAGGGCCGTCAAGATCCTCAAGAAGAAGAAGTTGCGAAGGATCCCCAACGGGGAGGCCA  
ACGTGAAGAAGGAAATTCAACTACTGAGGAGGTTACGGCACAAAAATGTCATCCAGCTGGTGGATGTGTT  
ATACAACGAAGAGAAGCAGAAAAATGTATATGGTGATGGAGTACTGCGTGTGTGGCATGCAGGAAATGCTG  
GACAGCGTGCCGGAGAAGCGTTTCCAGTGTCAGGCCACGGGTACTTCTGTCAGCTGATTGACGGCC  
TGGAGTACCTGCATAGCCAGGGCATTGTGCACAAGGACATCAAGCCGGGGAACCTGCTGCTCACCACCGG  
TGGCACCTCAAAATCTCCGACCTGGGCGTGGCCGAGGCACTGCACCCGTTGCGGGCGGACGACACCTGC  
CGGACCAGCCAGGGCTCCCCGGCTTTCCAGCCGCCCAGATTGCCAACGGCCTGGACACCTTCTCCGGCT  
TCAAGGTGGACATCTGGTCGGCTGGGGTCACCCTCTACAACATCACCACGGGTCTGTACCCCTTCAAGG  
GGACAACATCTACAAGTTGTTTGAGAACATCGGGAAGGGGAGCTACGCCATCCGGGGCGACTGTGGCCCC  
CCGCTCTCTGACCTGCTGAAAGGGATGCTTGAGTACGAACCGGCCAAGAGGTTCTCCATCCGGCAGATCC  
GGCAGCACAGCTGGTTCCGGAAGAAACATCCTCCGGCTGAAGCACCAAGTGCCCATCCCACCGAGCCCAGA  
CACCAAGGACCGGTGGCGCAGCATGACTGTGGTGCCGTACTTGGAGGACCTGCACGGCGCGGACGAGGAC  
GAGGACCTCTTCGACATCGAGGATGACATCATCTA ACTCAGGACTTCACGGTGCCCGGACAGGTCCCAG  
AAGAGGAGGCCAGTCACAATGGACAGCGCCGGGGCCTCCCCAAGGCCGTGTGTATGAACGGCACAGAGGC  
GGCGCAGCTGAGCACCAAATCCAGGGCGGAGGGCCGGGCCCCCAACCCTGCCCCGAAGGCCTGCTCCGCC  
AGCAGCAAGATCCGCCGGCTGTGCGCCTGCAAGCAGCAGTGA

>|c| NM\_017569.4\_cds\_NP\_060039.1\_1 [gene=SUPT20H] [db\_xref=CCDS:CCDS9362.1]  
[protein=transcription factor SPT20 homolog isoform b] [protein\_id=NP\_060039.1] [location=303..2504]  
[gbkey=CDS]

ATGCAACAAGCTTTAGAACTAGCTTTGGATCGTGCAGAGTATGTCATTGAAAGTGCCCGACAGAGACCTC  
CTAAAAGGAAATACCTATCAAGTGGAAGAAAATCTGTATTTCAAAAACCTTATGACTTGTATATTGAAGA  
ATGTGAAAAAGAACCTGAAGTTAAGCAGAAATTAAGAAGAAATGTGAACTTGTTAGAGAAGCTTGTTATG  
CAAGAGACTTTGTCATGTTTAGTGGTCAATCTATACCCAGGAAATGAGGGATATTCTCTGATGCTCAGGG  
GAAAAAACGGATCAGATTCCGAGACCATTGACTGCCCTATGAAGAAGGAGAGTTGCTTGAATATTTGGA  
TGCAGAAGAATTACCTCTATTTTGGTTGATCTCTAGAAAAATCTCAGGTTAATATTTTTCATTGCGGA  
TGTGTCATAGCAGAAATACGTGACTACAGGCAGTCCAGTAACATGAAATCTCCTGGTTACCAAAGTCGGC  
ACATTCTTTACGTCCAACAATGCAGACTTTAATTTGTGATGTACATTCAATAACAAGTGATAACCACAA  
ATGGACCCAGGAAGACAAACTTTTGCTTGAGAGCCAGCTCATCCTAGCTACAGCTGAACCACTCTGTCTT  
GATCCTTCTATAGCAGTCACCTGCACTGCAACAGACTGCTCTATAACAAGCAAAAGATGAACACTCGCC  
CAATGAAACGGTGTTTCAAGAGGTATTCCAGATCCTCTCTGAATCGGCAGCAAGATCTATCTCATTGTCC  
ACCTCCTCCTCAGCTGAGGTTACTTGATTTCTTACAAAAAGAAAGGAAAGAAAAGCAGGTCAGCATTAT  
GACCTCAAATTTCTAAGGCAGGAAATTGTGTAGATATGTGGAAACGGAGTCCCTGTAATTTGGCCATAC  
CTTCTGAAGTAGATGTGGAGAAATATGCTAAAGTGGAAGTCTATCAAATCTGATGACTCACAGCCAAC  
AGTCTGGCCAGCCCATGATGTAAAAGATGATTATGTATTTGAATGTGAAGCTGGTACTCAGTATCAGAAA  
ACAAAGCTGACCATCTTGCAGTCGCTTGAGATCCACTTTACTATGGTAAAATACAGCCATGTAAAGCAG  
ATGAAGAAAGTGACAGCCAGATGTCTCCATCACACTCGTCCACAGATGATCATTCAAATTGGTTCATTAT  
TGGATCAAAGACCGATGCTGAGAGGGTAGTCAATCAGTACCAAGAATTAGTCCAGAATGAAGCCAAATGT  
CCGGTCAAGATGTCACACAGCTCCAGTGGCTCAGCCAGTCTGAGTCAGGTTTCTCCAGGGAAAGAAACAG  
ATCAAACCTGAAACCGTGTCAGTTCAGTCTTCGGTATTGGGGAAGGGTGTAACATCGACCCCCACCAAT

CAAACCTCCCTCAAGCTCAGGAAATAGTTCCTCAGGTAACCTATTTTACACCACAACAGACAAGCAGCTTT  
CTCAAATCTCCAACTCCTCCTCTTCTTAAGCCATCAAGTATTCCTCGGAAATCATCTGTGGATCTCA  
ATCAAGTTAGCATGCTTTCTCCAGCTGCCCTATCACCTGCCAGCTCATCACAAAGAACCACGGCCACCCA  
GGTCATGGCAAACCTCTGCTGGACTTAACTTCATCAATGTAGTGGGCTCTGTTTGTGGGGCCCAGGCTTTG  
ATGAGTGGTTCAAACCCCATGCTGGGCTGTAACACTGGTGCCATAACTCCTGCAGGAATAAACCTGAGCG  
GCCTTCTACCCTCAGGAGGTCTGCTACCAAATGCACTGCCCAGTGCAATGCAGGCAGCTTCTCAAGCAGG  
TGTTCCATTTGGTTTAAAAATACTTCAAGTCTCAGGCCCTTAAATCTACTCCAGCTTCCAGGTGGTTCA  
CTTATTTTAACTCTGCAGCAGCAGCAACAGCAGCTCTCCAGTTTACACCACAACAACCTCAGCAGC  
CCACAACCTGTAGTCCTCAACAGCCAGGGGAGCAGGGTTCTGAGCAAGGTTCAACCAGTCAAGAACAGGC  
CTTATCTGCTCAGCAAGCTGCTGTTATTAACCTTACTGGAGTAGGAAGTTTTATGCAGTCACAGGCAGCT  
GCAGTTGCGATTCTTGCAGCATCAAATGGCTATGGCAGCAGCAGCAGCACAACAGCTCAGCTACATCAT  
CATCGGCATACAGGCAGCCAGTCAAAAAGTAA

>|cl|NM\_013254.4\_cds\_NP\_037386.1\_1 [gene=TBK1] [db\_xref=CCDS:CCDS8968.1]  
[protein=serine/threonine-protein kinase TBK1] [protein\_id=NP\_037386.1] [location=100..2289]  
[gbkey=CDS]

ATGCAGAGCACTTCTAATCATCTGTGGCTTTTATCTGATATTTAGGCCAAGGAGCTACTGCAAATGTCT  
TTCGTGGAAGACATAAGAAAACCTGGTGATTTATTTGCTATCAAAGTATTTAATAACATAAGCTTCCTTCG  
TCCAGTGGATGTTCAAATGAGAGAATTTGAAGTGTTGAAAAAACTCAATCACAAAAATATTGTCAAATTA  
TTTGCTATTGAAGAGGAGACAACAACAAGACATAAAGTACTTATTATGGAATTTTGTCCATGTGGGAGTT  
TATACACTGTTTTAGAAGAACCTTCTAATGCCTATGGACTACCAGAATCTGAATTCTTAATTGTTTTGCG  
AGATGTGGTGGGTGGAATGAATCATCTACGAGAGAATGGTATAGTGCACCGTGATATCAAGCCAGGAAAT  
ATCATGCGTGTTATAGGGGAAGATGGACAGTCTGTGTACAAACTCACAGATTTTGGTGCAGCTAGAGAAT

TAGAAGATGATGAGCAGTTTGTCTCTGTATGGCACAGAAGAATATTTGCACCCTGATATGTATGAGAG  
AGCAGTGCTAAGAAAAGATCATCAGAAGAAATATGGAGCAACAGTTGATCTTTGGAGCATTGGGGTAACA  
TTTTACCATGCAGCTACTGGATCACTGCCATTTAGACCCTTTGAAGGGCCTCGTAGGAATAAAGAAGTGA  
TGTATAAAATAATTACAGGAAAGCCTTCTGGTGCAATATCTGGAGTACAGAAAGCAGAAAATGGACCAAT  
TGACTGGAGTGGAGACATGCCTGTTTCTTGCACTTTCTCGGGGTCTTCAGGTTCTACTTACCCCTGTT  
CTTGCAAACATCCTTGAAGCAGATCAGGAAAAGTGTGGGGTTTTGACCAGTTTTTGCAGAACTAGTG  
ATATACTTCACCGAATGGTAATTCATGTTTTTCGCTACAACAAATGACAGCTCATAAGATTATATTCA  
TAGCTATAATACTGCTACTATATTTTATGAAGTGGTATATAAACAACCAAAATTATTTCTTCAAATCAA  
GAACTTATCTACGAAGGGCGACGCTTAGTCTTAGAACCTGGAAGGCTGGCACAACATTTCCCTAAACTA  
CTGAGGAAAACCTATATTTGTAGTAAGCCGGGAACCTCTGAATACCATAGGATTAATATATGAAAAAAT  
TTCCCTCCCTAAAGTACATCCACGTTATGATTTAGACGGGGATGCTAGCATGGCTAAGGCAATAACAGGG  
GTTGTGTGTTATGCCTGCAGAATTGCCAGTACCTTACTGCTTTATCAGGAATTAATGCGAAAGGGGATAC  
GATGGCTGATTGAATTAATTAAGATGATTACAATGAACTGTTCAAAAAAGACAGAAGTTGTGATCAC  
ATTGGATTTCTGTATCAGAAACATTGAAAAAACTGTGAAAGTATATGAAAAGTTGATGAAGATCAACCTG  
GAAGCGGCAGAGTTAGGTGAAATTTAGACATACACACCAAAATTGTTGAGACTTTCCAGTTCTCAGGGAA  
CAATAGAAACAGTCTTCAGGATATCGACAGCAGATTATCTCCAGGTGGATCACTGGCAGACGCATGGGC  
ACATCAAGAAGGCACTCATCCGAAAGACAGAAATGTAGAAAACTACAAGTCCTGTAAATTGCATGACA  
GAGATTTACTATCAGTTCAAAAAAGACAAAGCAGAACGTAGATTAGCTTATAATGAAGAACAAATCCACA  
AATTTGATAAGCAAAAACTGTATTACCATGCCACAAAAGCTATGACGCACTTTACAGATGAATGTGTAA  
AAAGTATGAGGCATTTTTGAATAAGTCAGAAGAATGGATAAGAAAGATGCTTCATCTTAGGAAACAGTTA  
TTATCGCTGACTAATCAGTGTTTTGATATTGAAGAAGAAGTATCAAAATATCAAGAATATACTAATGAGT  
TACAAGAACTCTGCCTCAGAAAATGTTTACAGCTTCCAGTGGAATCAAACATACCATGACCCCAATTTA  
TCCAAGTTCTAACACATTAGTAGAAATGACTCTTGGTATGAAGAAATTAAGGAAGAGATGGAAGGGGTG  
GTAAAGAACTTGCTGAAAATAACCACATTTTAGAAAGTTTGGCTCTTAACCATGGATGGTGGCCTTC  
GCAACGTTGACTGTCTTAG

>|cl|NM\_006405.7\_cds\_NP\_006396.2\_1 [gene=TM9SF1] [db\_xref=CCDS:CCDS9617.1]  
[protein=transmembrane 9 superfamily member 1 isoform a precursor] [protein\_id=NP\_006396.2]  
[location=114..1934] [gbkey=CDS]

ATGACAGTCGTAGGGAACCCCTCGAAGTTGGAGCTGCCAGTGGTTGCCAATCCTGATACTGTTGCTGGGCA  
CAGGCCATGGGCCAGGGGTGGAAGGCGTGACACACTACAAGGCCGGCGACCCTGTTATTCTGTATGTCAA  
CAAAGTGGGACCCTACCATAACCCCTCAGGAACTTACCACTACTATCAGCTTCCAGTCTGCTGCCCTGAG  
AAGATACGTCACAAAAGCCTTAGCCTGGGTGAAGTGCTGGATGGGGACCGAATGGCTGAGTCTTTGTATG  
AGATCCGCTTTCGGGAAAACGTGGAGAAGAGAATTCTGTGCCACATGCAGCTCAGTTCTGCACAGGTGGA  
GCAGCTGCGCCAGGCCATTGAAGAACTGTACTACTTTGAATTTGTGGTAGATGACTTGCCAATCCGGGGC  
TTTGTGGGCTACATGGAGGAGAGTGGTTTCCTGCCACACAGCCACAAGATAGGACTCTGGACCCATTTGG  
ACTCCACCTAGAATTCCATGGAGACCGAATTATTTGCCAATGTTTCAGTGCGGGACGTCAAGCCCCA  
CAGCTTGGATGGGTTACGACCTGACGAGTTCCTAGGCCTTACCCACACTTATAGCGTGCGCTGGTCTGAG  
ACTTCAGTGGAGCGTCGGAGTGACAGGCGCCGTGGTGACGATGGTGGTTTCTTTCCTCGAACACTGGAAA  
TCCATTGGTTGTCCATCATCAACTCCATGGTGCTTGTGTTTTTACTGGTGGGTTTTGTGGCTGTCATTCT  
AATGCGTGTGCTTCGGAATGACCTGGCTCGGTACAACCTTAGATGAGGAGACCACCTCTGCAGGTTCTGGT  
GATGACTTTGACCAGGGTGACAATGGCTGGAAAATTATCCATACAGATGTCTTCCGCTTCCCCCATAACC  
GTGGTCTGCTCTGTGCTGTGCTTGGCGTGGGTGCCAGTTCCTGGCCCTTGGCACTGGCATTATTGTCAT  
GGCACTGCTGGGCATGTTCAATGTGCACCGTCATGGGGCCATTAACTCAGCAGCCATCTTGTTGTATGCC  
CTGACCTGCTGCATCTCTGGCTACGTGTCCAGCCACTTCTACCGGCAGATTGGAGGCGAGCGTTGGGTGT  
GGAACATCATTCTCACCACCAGTCTCTTCTGTGCCTTTCTTCTGACGTGGAGTGTGGTGAACCTCAGT  
GCATTGGGCCAATGGTTTCGACACAGGCTCTGCCAGCCACAACCATCCTGCTGCTTCTGACGGTTTGGCTG  
CTGGTGGGCTTTCCTCACTGTCATTGGAGGCATCTTTGGGAAGAACAACGCCAGCCCCTTTGATGCAC

CCTGTCGCACCAAGAACATCGCCCGGGAGATTCCACCCAGCCCTGGTACAAGTCTACTGTCATCCACAT  
GACTGTTGGAGGCTTCCTGCCTTTCAGTGCCATCTCTGTGGAGCTGTACTACATCTTTGCCACAGTATGG  
GGTCGGGAGCAGTACACTTTGTACGGCATCCTCTTCTTTGTCTTCGCCATCCTGCTGAGTGTGGGGGCTT  
GCATCTCCATTGCACTCACCTACTTCCAGTTGTCTGGGGAGGATTACCGCTGGTGGTGGCGATCTGTGCT  
GAGTGTGGCTCCACCGGCCTTTCATCTTCTCTACTCAGTTTTCTATTATGCCGGCGCTCCAACATG  
TCTGGGGCAGTACAGACAGTAGAGTTCTTCGGCTACTCCTTACTCACTGGTTATGTCTTCTTCTCATGC  
TGGGCACCATCTCCTTTTTTCTCCCTAAAGTTCATCCGGTATATCTATGTTAACCTCAAGATGGACTG  
A

>|cl|NM\_001165030.3\_cds\_NP\_001158502.1\_1 [gene=TMEM41B] [db\_xref=CCDS:CCDS53600.1]  
[protein=transmembrane protein 41B isoform 2] [protein\_id=NP\_001158502.1] [location=153..536]  
[gbkey=CDS]

ATGGCGAAAGGCAGAGTCGCCGAACGATCGCAGTTGGGCGCTCACCACACGACCCCGTGGGGGACGGGG  
CAGCGGGGACGCGGGGTCTCGCGGCGCCTGGCAGCAGAGACCACCAGAAGGAAAAATCCTGGGTAGAAGC  
TGGATCAGCAAGAATGTCACTCCTTATATTGGTGTCCATTTTCTTATCTGCAGCTTTTGTTATGTTTTG  
GTATATAAAAATTTCTCAGCTTAGTGAAGAAGAAAGAGTGAATATGAAGGTTCCAGAGATATGGATG  
ATGCCAAGGCTCTAGGAAAAGTTTTATCCAAATACAAGGACACCTTTTATGTTCAAGTACTTGTAGCTTA  
TTTTGCTACATATATTTTGTATCCTTTTAACTGA

>|cl|NM\_153015.3\_cds\_NP\_694560.1\_1 [gene=TMEM74] [db\_xref=CCDS:CCDS6310.1]  
[protein=transmembrane protein 74] [protein\_id=NP\_694560.1] [location=159..1076] [gbkey=CDS]  
ATGGAGCTCCACTACCTTGCTAAGAAGAGCAACCAGGCAGACCTCTGTGATGCCAGGGACTGGAGTTCAA

GAGGGCTGCCTGGTGACCAGGCAGATACAGCAGCCACAAGAGCTGCTCTCTGCTGTCAGAAACAGTGTGC  
ATCCACCCCAAGAGCAACCGAGATGGAAGGGTCTAAACTTAGTTCTTCTCCAGCATCCCCCTCCTCTCT  
CTGCAAAACAGTACTCTTCAGCCAGATGCCTTTCACCAGGACTTCTCCACTCAGGGAACAACCAAATAA  
CAGCGGAACGGAAAGTCTGTAAGTCTGCAGCCAGGAATTAGAACTTCTTTTACCTATGTGGACAAAAA  
CATCAACTTGAGCAGCGGAACCGGAGCTCGCCATCAGCAAAAGGGCATAATCACCTGGGGAGCTTGGC  
TGGGAAAATCCAAATGAGTGGTCCCAAGAGGCTGCCATATCTTTGATATCTGAAGAGGAGGATGATACAA  
GTTCAGAAGCCACGTCTTCAGGGAAGTCTATAGACTATGGTTTCATCAGCGCCATCTTGTTCTTGGTCAC  
TGGGATCCTGCTCGTGATCATCTTTACATCGTCCACGGGAAGTGAAGTGTGGACCCCAACTGTGGCA  
GCCCCGGGAGATGGAGCGCCTGGAGAAGGAGAGTGCGAGGCTGGGGGCTCACCTGGACCGCTGTGTGATTG  
CGGGGCTCTGCCTCCTCACGCTGGGGGGCGTCATCCTGTCTGCTTGTTAATGATGTCCATGTGGAAGGG  
GGAGCTCTATCGTCGAAACAGATTTGCCTCTTCCAAAGAGTCTGCAAACTCTATGGTTCTTTCACTTC  
AGGATGAAAACCAGCACGAATGAAAACACTCTGGAAGTGCCTTGGTAGAGGAAGATGCGCTTGCTGTAC  
AGAGTTAA

>|cl|NM\_001190942.2\_cds\_NP\_001177871.1\_1 [gene=TNFSF10] [db\_xref=CCDS:CCDS54680.1]  
[protein=tumor necrosis factor ligand superfamily member 10 isoform 2] [protein\_id=NP\_001177871.1]  
[location=47..352] [gbkey=CDS]

ATGGCTATGATGGAGGTCCAGGGGGGACCCAGCCTGGGACAGACCTGCGTGCTGATCGTGATCTTCACAG  
TGCTCCTGCAGTCTCTGTGTGGCTGTAAGTACGTGTACTTTACCAACGAGCTGAAGCAGATGCAGGA  
CAAGTACTCCAAAAGTGGCATTGCTTGTTTCTTAAAGAAGATGACAGTTATTGGGACCCCAATGACGAA  
GAGAGTATGAACAGCCCCTGCTGGCAAGTCAAGTGGCAACTCCGTCAGCTCGTTAGAAAGACTCCAAGAA  
TGAAAAGGCTCTGGGCCGCAAAATAA

>|cl|NM\_000546.6\_cds\_NP\_000537.3\_1 [gene=TP53] [db\_xref=CCDS:CCDS11118.1] [protein=cellular tumor antigen p53 isoform a] [protein\_id=NP\_000537.3] [location=143..1324] [gbkey=CDS]

ATGGAGGAGCCGCAGTCAGATCCTAGCGTCGAGCCCCCTCTGAGTCAGGAAACATTTTCAGACCTATGGA  
AACTACTTCCTGAAAACAACGTTCTGTCCCCCTTGCCGTCCCAAGCAATGGATGATTTGATGCTGTCCCC  
GGACGATATTGAACAATGGTTCACTGAAGACCCAGGTCCAGATGAAGCTCCCAGAATGCCAGAGGCTGCT  
CCCCCGTGGCCCCCTGCACCAGCAGCTCCTACACCGGCGGCCCTGCACCAGCCCCCTCCTGGCCCCCTGT  
CATCTTCTGTCCCTTCCCAGAAAACCTACCAGGGCAGCTACGGTTTCCGTCTGGGCTTCTTGCAATTCTGG  
GACAGCCAAGTCTGTGACTTGACGTA CTCCCCTGCCCTCAACAAGATGTTTTGCCAACTGGCCAAGACC  
TGCCCTGTGCAGCTGTGGGTTGATTCCACACCCCCGCCGGCACCCGCGTCCGCGCCATGGCCATCTACA  
AGCAGTCACAGCACATGACGGAGGTTGTGAGGCGCTGCCCCACCATGAGCGCTGCTCAGATAGCGATGG  
TCTGGCCCCCTCCTCAGCATCTTATCCGAGTGGAAGGAAATTTGCGTGTGGAGTATTTGGATGACAGAAAC  
ACTTTTCGACATAGTGTGGTGGTGCCCTATGAGCCGCCTGAGGTTGGCTCTGACTGTACCACCATCCACT  
ACAACTACATGTGTAACAGTTCCTGCATGGGCGGCATGAACCGGAGGCCCATCCTCACCATCATCACACT  
GGAAGACTCCAGTGGAATCTACTGGGACGGAACAGCTTTGAGGTGCGTGTTTGTGCCTGTCCTGGGAGA  
GACCGGCGCACAGAGGAAGAGAATCTCCGCAAGAAAGGGGAGCCTCACCACGAGCTGCCCCAGGGAGCA  
CTAAGCGAGCACTGCCAACAACACCAGCTCCTCTCCCCAGCCAAAGAAGAAACCACTGGATGGAGAATA  
TTTCACCCTTCAGATCCGTGGGCGTGAGCGCTTCGAGATGTTCCGAGAGCTGAATGAGGCCTTGGAATC  
AAGGATGCCCAGGCTGGGAAGGAGCCAGGGGGGAGCAGGGCTCACTCCAGCCACCTGAAGTCCAAAAAGG  
GTCAGTCTACCTCCCGCCATAAAAACTCATGTTCAAGACAGAAGGGCCTGACTCAGACTGA

>|cl|NM\_021202.3\_cds\_NP\_067025.1\_1 [gene=TP53INP2] [db\_xref=CCDS:CCDS13240.1]  
[protein=tumor protein p53-inducible nuclear protein 2] [protein\_id=NP\_067025.1] [location=336..998]  
[gbkey=CDS]

ATGTTCCAGCGCCTCTCCAGCCTCTTCTTCAGCACCCCCTCGCCCCCGAAGACCCCGACTGCCCCCGCG  
CCTTCGTGTCGGAGGAGGATGAAGTGGACGGCTGGCTCATCATTGACCTGCCGGACAGCTACGCGGCTCC  
ACCCAGCCCCGGGGCCGCCCTGCCCCGCGGGCCGCCCTCCGCCGCGCCCTCCTTGATGGACGAGAGC  
TGTTTTGTTACCCCTCCCGCCTGTTTTACGGCAGAGGGGCCTGGACTCGGTCCCGCCCGCCTCCAGAGCA  
GTCCCCTGGAGGACCTCCTCATCGAGCACCCAGCATGTCCGTTTACGTCACCGGCAGCACCATAGTGCT  
AGAGCCCGGGTCCCCTTCCCGCTCCCGGACGCGGCCCTGCCTGACGGCGACCTCAGCGAAGGGGAATTG  
ACGCCCCCGCCGCGAGCCGCGGGCCGCGGCCACGCCGCTCCTCTCCAGCGCGGGCGGGCGCTGCTGG  
AGAAGGCGGGCCAGGTGCGGCGGCTGCAGCGGGCCCGGCAGCGGGCAGAGCGCCACGCGCTGAGCGCCAA  
GGCGGTGCAGCGGCAGAACCGAGCCCGCGAGAGCCGTCCGCGCCGGTCCAAGAACCAGAGCAGCTTCATC  
TACCAGCCGTGCCAGCGCCAGTTCAACTACTGA

>|cl|NM\_003722.5\_cds\_NP\_003713.3\_1 [gene=TP63] [db\_xref=CCDS:CCDS3293.1] [protein=tumor  
protein 63 isoform 1] [protein\_id=NP\_003713.3] [location=128..2170] [gbkey=CDS]

ATGAATTTTGAAACTTCACGGTGTGCCACCCTACAGTACTGCCCTGACCCTTACATCCAGCGTTTCGTAG  
AAACCCAGCTCATTTCTTGGAAAGAAAGTTATTACCGATCCACCATGTCCAGAGCACACAGACAAA  
TGAATTCCTCAGTCCAGAGGTTTTCCAGCATATCTGGGATTTTCTGGAACAGCCTATATGTTTCAGTTCAG  
CCCATTGACTTGAACTTTGTGGATGAACCATCAGAAGATGGTGCGACAAACAAGATTGAGATTAGCATGG  
ACTGTATCCGCATGCAGGACTCGGACCTGAGTGACCCCATGTGGCCACAGTACACGAACCTGGGGCTCCT  
GAACAGCATGGACCAGCAGATTCAGAACGGCTCCTCGTCCACCAGTCCCTATAACACAGACCACGCGCAG  
AACAGCGTCACGGCGCCCTCGCCCTACGCACAGCCCAGCTCCACCTTCGATGCTCTCTCTCCATACCCG  
CCATCCCCTCCAACACCGACTACCCAGGCCCGCACAGTTTCGACGTGTCCTTCAGCAGTCGAGCACCCG

CAAGTCGGCCACCTGGACGTATTCCACTGAACTGAAGAACTCTACTGCCAAATTGCAAAGACATGCCCC  
ATCCAGATCAAGGTGATGACCCACCTCCTCAGGGAGCTGTTATCCGCGCCATGCCTGTCTACAAAAAAG  
CTGAGCACGTACGGAGGTGGTGAAGCGGTGCCCCAACCATGAGCTGAGCCGTGAATTCAACGAGGGACA  
GATTGCCCTCCTAGTCATTTGATTGAGTAGAGGGGAACAGCCATGCCAGTATGTAGAAGATCCCATC  
ACAGGAAGACAGAGTGTGCTGGTACCTTATGAGCCACCCAGGTTGGCACTGAATTCACGACAGTCTTGT  
ACAATTCATGTGTAACAGCAGTTGTGTTGGAGGGATGAACCGCCGTCCAATTTAATCATTGTTACTCT  
GGAAACCAGAGATGGGCAAGTCCTGGGCCGACGCTGCTTTGAGGCCCGGATCTGTGCTTGCCCAGGAAGA  
GACAGGAAGGCGGATGAAGATAGCATCAGAAAGCAGCAAGTTTCGGACAGTACAAAGAACGGTGATGGTA  
CGAAGCGCCCGTTTCGTCAGAACACACATGGTATCCAGATGACATCCATCAAGAAACGAAGATCCCCAGA  
TGATGAACTGTTATACTTACCAGTGAGGGGCGGTGAGACTTATGAAATGCTGTTGAAGATCAAAGAGTCC  
CTGGAACTCATGCAGTACCTTCCTCAGCACACAATTGAAACGTACAGGCAACAGCAACAGCAGCAGCACC  
AGCACTTACTTCAGAAACAGACCTCAATACAGTCTCCATCTTCATATGGTAACAGCTCCCCACCTCTGAA  
CAAAATGAACAGCATGAACAAGCTGCCTTCTGTGAGCCAGCTTATCAACCCTCAGCAGCGCAACGCCCTC  
ACTCCTACAACCATTCCTGATGGCATGGGAGCCAACATTCCCATGATGGGCACCCACATGCCAATGGCTG  
GAGACATGAATGGACTCAGCCCCACCCAGGCACTCCCTCCCCACTCTCCATGCCATCCACCTCCCACTG  
CACACCCACCTCCGTATCCACAGATTGCAGCATTGTCAGTTTCTTAGCGAGGTTGGGCTGTTTCATCA  
TGTCTGGACTATTTACGACCCAGGGGCTGACCACCATCTATCAGATTGAGCATTACTCCATGGATGATC  
TGGCAAGTCTGAAAATCCCTGAGCAATTCGACATGCGATCTGGAAGGGCATCCTGGACCACCGGCAGCT  
CCACGAATTCTCCTCCCCTTCTCATCTCCTGCGGACCCCAAGCAGTGCCTCTACAGTCAGTGTGGGCTCC  
AGTGAGACCCGGGGTGAGCGTGTTATTGATGCTGTGCGATTACCCCTCCGCCAGACCATCTCTTTCCAC  
CCCGAGATGAGTGGAATGACTTCAACTTTGACATGGATGCTCGCCGCAATAAGCAACAGCGCATCAAAGA  
GGAGGGGGAGTGA

>|cl|NM\_005427.4\_cds\_NP\_005418.1\_1 [gene=TP73] [db\_xref=CCDS:CCDS49.1] [protein=tumor protein p73 isoform a] [protein\_id=NP\_005418.1] [location=160..2070] [gbkey=CDS]

ATGCCCCAGTCCACCGCCACCTCCCCTGATGGGGGCACCACGTTTGAGCACCTCTGGAGCTCTCTGGAAC  
CAGACAGCACCTACTTCGACCTTCCCCAGTCAAGCCGGGGGAATAATGAGGTGGTGGGCGGAACGGATTC  
CAGCATGGACGTCTTCCACCTGGAGGGCATGACTACATCTGTCATGGCCCAGTTCAATCTGCTGAGCAGC  
ACCATGGACCAGATGAGCAGCCGCGCGGCCTCGGCCAGCCCCTACACCCAGAGCACGCCGCCAGCGTGC  
CCACCCACTCGCCCTACGCACAACCCAGCTCCACCTTCGACACCATGTCGCCGGCGCCTGTCATCCCCTC  
CAACACCGACTACCCCGGACCCCACTTTGAGGTCACTTTCCAGCAGTCCAGCACGGCCAAGTCAGCC  
ACCTGGACGTACTCCCCGCTCTTGAAGAACTCTACTGCCAGATCGCCAAGACATGCCCCATCCAGATCA  
AGGTGTCCACCCCGCCACCCCAAGGCACCGCCATCCGGGCCATGCCTGTTTACAAGAAAGCGGAGCACGT  
GACCGACGTCGTGAAACGCTGCCCCAACCACGAGCTCGGGAGGGACTTCAACGAAGGACAGTCTGCTCCA  
GCCAGCCACCTCATCCGCGTGGAAGGCAATAATCTCTCGCAGTATGTGGATGACCCTGTCACCGGCAGGC  
AGAGCGTCGTGGTGCCCTATGAGCCACCACAGGTGGGGACGGAATTCACCACCATCCTGTACAACTTCAT  
GTGTAACAGCAGCTGTGTAGGGGGCATGAACCGGCGGCCCATCCTCATCATCATCACCTGGAGATGCGG  
GATGGGCAGGTGCTGGGCCGCCGGTCTTTGAGGGCCGCATCTGCGCCTGTCCTGGCCGCGACCGAAAAG  
CTGATGAGGACCACTACCGGGAGCAGCAGGCCCTGAACGAGAGCTCCGCCAAGAACGGGGCCGCCAGCAA  
GCGTGCCTTCAAGCAGAGCCCCCTGCCGTCCCCGCCCTTGGTGCCGGTGTGAAGAAGCGGCGGCATGGA  
GACGAGGACACGTACTACCTTCAGGTGCGAGGCGGGGAGAACTTTGAGATCCTGATGAAGCTGAAAGAGA  
GCCTGGAGCTGATGGAGTTGGTGCCGCAGCCACTGGTGGACTCCTATCGGCAGCAGCAGCAGCTCCTACA  
GAGGCCGAGTCACCTACAGCCCCCGTCTACGGGCGGGTCTCTCGCCATGAACAAGGTGCACGGGGGC  
ATGAACAAGCTGCCCTCCGTCAACCAGCTGGTGGGCCAGCCTCCCCCGCACAGTTTCGGCAGCTACACCCA  
ACCTGGGGCCCGTGGGCCCCGGGATGCTCAACAACCATGGCCACGCAGTGCCAGCCAACGGCGAGATGAG  
CAGCAGCCACAGCGCCCAGTCCATGGTCTCGGGGTCCCACTGCACTCCGCCACCCCCCTACCACGCCGAC  
CCCAGCCTCGTCAGTTTTTTAACAGGATTGGGGTGTCCAACTGCATCGAGTATTTACCTCCCAAGGGT  
TACAGAGCATTTACCACCTGCAGAACCTGACCATTGAGGACCTGGGGGCCCTGAAGATCCCCGAGCAGTA

CCGCATGACCATCTGGCGGGGCCTGCAGGACCTGAAGCAGGGCCACGACTACAGCACCGCGCAGCAGCTG  
CTCCGCTCTAGCAACGCGGCCACCATCTCCATCGGCGGCTCAGGGGAAGTGCAGCGCCAGCGGGTCATGG  
AGGCCGTGCACTTCCGCGTGCGCCACACCATCACCATCCCCAACCGCGGCGGCCAGGCGGCGGCCCTGA  
CGAGTGGGCGGACTTCGGCTTCGACCTGCCCCGACTGCAAGGCCCGCAAGCAGCCCATCAAGGAGGAGTTC  
ACGGAGGCCGAGATCCACTGA

>|cl|NM\_000368.5\_cds\_NP\_000359.1\_1 [gene=TSC1] [db\_xref=CCDS:CCDS6956.1] [protein=hamartin  
isoform 1] [protein\_id=NP\_000359.1] [location=218..3712] [gbkey=CDS]

ATGGCCCAACAAGCAAATGTCGGGGAGCTTCTTGCCATGCTGGACTCCCCATGCTGGGTGTGCGGGACG  
ACGTGACAGCTGTCTTTAAAGAGAACCTCAATTCTGACCGTGGCCCTATGCTTGTAACACCTTGGTGGA  
TTATTACCTGGAAACCAGCTCTCAGCCGGCATTGCACATCCTGACCACCTTGCAAGAGCCACATGACAAG  
CACCTCTTGGACAGGATTAACGAATATGTGGGCAAAGCCGCCACTCGTTTATCCATCCTCTCGTTACTGG  
GTCATGTCATAAGACTGCAGCCATCTTGGAAGCATAAGCTCTCTCAAGCACCTCTTTGCCTTCTTTACT  
AAAATGTCTCAAGATGGACACTGACGTCGTTGTCCTCACAACAGGCGTCTTGGTGTGATAACCATGCTA  
CCAATGATTCCACAGTCTGGGAAACAGCATCTTCTTGATTTCTTTGACATTTTGGCCGTCTGTCATCAT  
GGTGCCTGAAGAAACCAGGCCACGTGGCGGAAGTCTATCTCGTCCATCTCCATGCCAGTGTGTACGCACT  
CTTTCATCGCCTTTATGGAATGTACCCTTGCAACTTCGTCTCCTTTTTGCGTTCTCATTACAGTATGAAA  
GAAAACCTGGAGACTTTTGAAGAAGTGGTCAAGCCAATGATGGAGCATGTGCGAATTCATCCGGAATTAG  
TGACTGGATCCAAGGACCATGAACTGGACCCTCGAAGGTGGAAGAGATTAGAACTCATGATGTTGTGAT  
CGAGTGTGCCAAAATCTCTCTGGATCCCACAGAAGCCTCATATGAAGATGGCTATTCTGTGTCTCACCAA  
ATCTCAGCCCGCTTCTCTCATCGTTCAGCCGATGTCACCACCAGCCCTTATGCTGACACACAGAATAGCT  
ATGGGTGTGCTACTTCTACCCCTTACTCCACGTCTCGGCTGATGTTGTAAATATGCCAGGGCAGCTACC  
TCAGACTCTGAGTTCATCGACACGGCTGATAACTGAACCACCACAAGCTACTCTTTGGAGCCCATCT

ATGGTTTGTGGTATGACCACTCCTCCAACCTTCTCCTGGAAATGTCCACCTGATCTGTCACACCCTTACA  
GTAAAGTCTTTGGTACAACCTGCAGGTGGAAAAGGAACTCCTCTGGGAACCCCAGCAACCTCTCCTCCTCC  
AGCCCCACTCTGTCATTGCGATGACTACGTGCACATTTCACTCCCCCAGGCCACAGTCACACCCCCCAGG  
AAGGAAGAGAGAATGGATTCTGCAAGACCATGTCTACACAGACAACACCATCTTCTGAATGACAGAGGAT  
CAGAAGAGCCACCTGGCAGCAAAGGTTCTGTCACTCTAAGTGATCTTCCAGGGTTTTTAGGTGATCTGGC  
CTCTGAAGAAGATAGTATTGAAAAAGATAAAGAAGAAGCTGCAATATCTAGAGAACTTTCTGAGATCACC  
ACAGCAGAGGCAGAGCCTGTGGTTCCTCGAGGAGGCTTTGACTCTCCCTTTTACCGAGACAGTCTCCAG  
GTTCTCAGCGGAAGACCCACTCGGCAGCCTCCAGTTCTCAGGGCGCCAGCGTGAACCTGAGCCTTTACA  
CTCCTCCCTGGACAAGCTTGGGCCTGACACACCAAAGCAAGCCTTTACTCCCATAGACCTGCCCTGCGGC  
AGTGCTGATGAAAGCCCTGCGGGAGACAGGGAATGCCAGACTTCTTTGGAGACCAGTATCTTCACTCCCA  
GTCCTTGTAATAATTCCACCTCCGACGAGAGTGGGCTTTGGAAGCGGGCAGCCTCCCCCGTATGATCATCT  
TTTTGAGGTGGCATTGCCAAAGACAGCCCATCATTTTGTCAATCAGGAAGACTGAGGAGCTGTTAAAGAAA  
GCAAAAGGAAACACAGAGGAAGATGGTGTGCCCTCTACCTCCCCAATGGAAGTGCTGGACAGACTGATAC  
AGCAGGGAGCAGACGCGCACAGCAAGGAGCTGAACAAGTTGCCTTTACCCAGCAAGTCTGTGACTGGAC  
CCACTTTGGAGGCTCTCCTCCTTCAGATGAGATCCGCACCCTCCGAGACCAGTTGCTTTTACTGCACAAC  
CAGTTACTCTATGAGCGTTTTAAGAGGCAGCAGCATGCCCTCCGGAACAGGCGGCTCCTCCGCAAGGTGA  
TCAAAGCAGCAGCTCTGGAGGAACATAATGCTGCCATGAAAGATCAGTTGAAGTTACAAGAGAAGGACAT  
CCAGATGTGGAAGGTTAGTCTGCAGAAAGAACAAGCTAGATACAATCAGCTCCAGGAGCAGCGTGACACT  
ATGGTAACCAAGCTCCACAGCCAGATCAGACAGCTGCAGCATGACCGAGAGGAATTCTACAACCAGAGCC  
AGGAATTACAGACGAAGCTGGAGGACTGCAGGAACATGATTGCGGAGCTGCGGATAGAACTGAAGAAGGC  
CAACAACAAGGTGTGTCACTGAGCTGCTGCTCAGTCAGGTTTCCAAAAGCTCTCAAACAGTGAGTCG  
GTCCAGCAGCAGATGGAGTTCTTGAACAGGCAGCTGTTGGTTCTTGGGGAGGTCAACGAGCTCTATTTGG  
AACAACCTGCAGAACAAGCACTCAGATACCACAAAGGAAGTAGAAATGATGAAAGCCGCCTATCGGAAAGA  
GCTAGAAAAAACAGAAGCCATGTTCTCCAGCAGACTCAGAGGCTTGATACCTCCCCAAAACGGATTTTG  
GAACTGGAATCTCACCTGGCCAAGAAAGACCACCTTCTTTTGAACAGAAGAAATATCTAGAGGATGTCA

AACTCCAGGCAAGAGGACAGCTGCAGGCCGCAGAGAGCAGGTATGAGGCTCAGAAAAGGATAACCCAGGT  
GTTTGAATTGGAGATCTTAGATTTATATGGCAGGTTGGAGAAAGATGGCCTCCTGAAAAAACTTGAAGAA  
GAAAAAGCAGAAGCAGCTGAAGCAGCAGAAGAAAGGCTTGAAGTGTGTAATGACGGGTGCTCAGATTCCA  
TGGTAGGGCACAATGAAGAGGCATCTGGCCACAACGGTGAGACCAAGACCCCCAGGCCAGCAGCGCCCG  
GGGCAGTAGTGGAAGCAGAGGTGGTGGAGGCAGCAGCAGCAGCAGCAGCGAGCTTTCTACCCAGAGAAA  
CCCCACACCAGAGGGCAGGCCATTTCAGCAGTCGGTGGGAGACGACTATGGGAGAAGCGTCTGCCAGCA  
TCCCCACCACTGTGGGCTCACTTCCCAGTTCAAAAAGCTTCTGGGTATGAAGGCTCGAGAGTTATTTCTG  
TAATAAGAGCGAGAGCCAGTGTGATGAGGACGGCATGACCAGTAGCCTTTCTGAGAGCCTAAAGACAGAA  
CTGGGCAAAGACTTGGGTGTGGAAGCCAAGATCCCCTGAACCTAGATGGCCCTACCCGTCTCCCCGA  
CCCCGGACAGTGTGGACAGCTACATATCATGGACTACAATGAGACTCATCATGAACACAGCTAA

>|cl|NM\_000548.5\_cds\_NP\_000539.2\_1 [gene=TSC2] [db\_xref=CCDS:CCDS10458.1] [protein=tuberin  
isoform 1] [protein\_id=NP\_000539.2] [location=111..5534] [gbkey=CDS]

ATGGCCAAACCAACAAGCAAAGATTTCAGGCTTGAAGGAGAAGTTTAAGATTCTGTTGGGACTGGGAACAC  
CGAGGCCAAATCCCAGGTCTGCAGAGGGTAAACAGACGGAGTTTATCATCACCGCGGAAATACTGAGAGA  
ACTGAGCATGGAATGTGGCCTCAACAATCGCATCCGGATGATAGGGCAGATTTGTGAAGTCGCAAAAACC  
AAGAAATTTGAAGAGCACGCAGTGGAAGCACTCTGGAAGGCGGTCGCGGATCTGTTGCAGCCGGAGCGGC  
CGCTGGAGGCCCCGGCACGCGGTGCTGGCTCTGCTGAAGGCCATCGTGAGGGGCAGGGCGAGCGTTTGGG  
GGTCCTCAGAGCCCTCTTCTTTAAGGTCATCAAGGATTACCCTTCCAACGAAGACCTTCACGAAAGGCTG  
GAGGTTTTCAAGGCCCTCACAGACAATGGGAGACACATCACCTACTTGGAGGAAGAGCTGGCTGACTTTG  
TCCTGCAGTGGATGGATGTTGGCTTGTCTCGGAATTCCTTCTGGTGCTGGTGAAGTGGTCAAATTCAA  
TAGCTGTTACCTCGACGAGTACATCGCAAGGATGGTTCAGATGATCTGTCTGCTGTGCGTCCGGACCGCG  
TCCTCTGTGGACATAGAGGTCTCCCTGCAGGTGCTGGACGCCGTGGTCTGCTACAAGTGCCTGCCGGCTG

AGAGCCTCCCGCTGTTTCATCGTTACCCTCTGTGCGACCATCAACGTCAAGGAGCTCTGCGAGCCTTGCTG  
GAAGCTGATGCGGAACCTCCTTGGCACCCACCTGGGCCACAGCGCCATCTACAACATGTGCCACCTCATG  
GAGGACAGAGCCTACATGGAGGACGCGCCCCTGCTGAGAGGAGCCGTGTTTTTTGTGGGCATGGCTCTCT  
GGGGAGCCCACCGGCTCTATTCTCTCAGGAACTCGCCGACATCTGTGTTGCCATCATTTTACCAGGCCAT  
GGCATGTCCGAACGAGGTGGTGTCTATGAGATCGTCTGTCCATCACCAGGCTCATCAAGAAGTATAGG  
AAGGAGCTCCAGGTGGTGGCGTGGGACATTCTGCTGAACATCATCGAACGGCTCCTTCAGCAGCTCCAGA  
CCTTGGACAGCCCGGAGCTCAGGACCATCGTCCATGACCTGTTGACCACGGTGGAGGAGCTGTGTGACCA  
GAACGAGTTCCACGGGTCTCAGGAGAGATACTTTGAACTGGTGGAGAGATGTGCGGACCAGAGGCCTGAG  
TCCTCCCTCCTGAACCTGATCTCCTATAGAGCGCAGTCCATCCACCCGGCCAAGGACGGCTGGATTGAGA  
ACCTGCAGGCGCTGATGGAGAGATTCTTCAGGAGCGAGTCCCGAGGCGCCGTGCGCATCAAGGTGCTGGA  
CGTGCTGTCCTTTGTGCTGCTCATCAACAGGCAGTTCTATGAGGAGGAGCTGATTAAGTCAAGTGGTCATC  
TCGCAGCTCTCCACATCCCCGAGGATAAAGACCACCAGGTCCGAAAGCTGGCCACCCAGTTGCTGGTGG  
ACCTGGCAGAGGGCTGCCACACACACCACTTCAACAGCCTGCTGGACATCATCGAGAAGGTGATGGCCCCG  
CTCCCTCTCCCCACCCCGGAGCTGGAAGAAAGGGATGTGGCCGCATACTCGGCCTCCTTGGAGGATGTG  
AAGACAGCCGTCCTGGGGCTTCTGGTCATCCTTCAGACCAAGCTGTACACCCTGCCTGCAAGCCACGCCA  
CGCGTGTGTATGAGATGCTGGTCAGCCACATTCAGCTCCACTACAAGCACAGCTACACCCTGCCAATCGC  
GAGCAGCATCCGGCTGCAGGCCTTTGACTTCCTGTTGCTGCTGCGGGCCGACTCACTGCACCGCCTGGGC  
CTGCCAACAAGGATGGAGTCGTGCGGTTTCAGCCCCTACTGCGTCTGCGACTACATGGAGCCAGAGAGAG  
GCTCTGAGAAGAAGACCAGCGGCCCCCTTTCTCCTCCACAGGGCCTCCTGGCCCGGCGCCTGCAGGCCC  
CGCCGTGCGGCTGGGGTCCGTGCCCTACTCCCTGCTCTTCCGCGTCTGCTGCAAGTGAAGCAGGAG  
TCTGACTGGAAGGTGCTGAAGCTGGTTCTGGGCAGGCTGCCTGAGTCCCTGCGCTATAAAGTGCTCATCT  
TTACTTCCCCTTGCAAGTGTGGACCAGCTGTGCTCTGCTCTGCTCCATGCTTTCAGGCCCAAAGACACT  
GGAGCGGCTCCGAGGCGCCCCAGAAGGCTTCTCCAGAACTGACTTGACCTGGCCGTGGTTCCAGTGCTG  
ACAGCATTAACTCTTACCATAACTACCTGGACAAAACCAAACAGCGCGAGATGGTCTACTGCCTGGAGC  
AGGGCCTCATCCACGCTGTGCCAGCCAGTGCCTGCTGGCCTTGTCCATCTGCAGCGTGGAGATGCCTGA

CATCATCATCAAGGCGCTGCCTGTTCTGGTGGTGAAGCTCACGCACATCTCAGCCACAGCCAGCATGGCC  
GTCCCACTGCTGGAGTTCCTGTCCACTCTGGCCAGGCTGCCGCACCTCTACAGGAACTTTGCCGCGGAGC  
AGTATGCCAGTGTGTTGCGCATCTCCCTGCCGTACACCAACCCCTCCAAGTTTAATCAGTACATCGTGTG  
TCTGGCCCATCACGTCATAGCCATGTGGTTCATCAGGTGCCGCTGCCCTTCCGGAAGGATTTTGTCCCT  
TTCATCACTAAGGGCCTGCGGTCCAATGTCCTCTTGCTTTTGATGACACCCCGAGAAGGACAGCTTCA  
GGGCCCCGAGTACTAGTCTCAACGAGAGACCCAAGAGTCTGAGGATAGCCAGACCCCCCAAACAAGGCTT  
GAATAACTCTCCACCCGTGAAAGAATTCAAGGAGAGCTCTGCAGCCGAGGCCTTCCGGTGCCGCAGCATC  
AGTGTGTCTGAACATGTGGTCCGCAGCAGGATACAGACGTCCCTCACCAGTGCCAGCTTGGGGTCTGCAG  
ATGAGAACTCCGTGGCCCAGGCTGACGATAGCCTGAAAAACCTCCACCTGGAGCTCACGGAAACCTGTCT  
GGACATGATGGCTCGATACGTCTTCTCCAACTTCACGGCTGTCCCGAAGAGGTCTCCTGTGGGCGAGTTC  
CTCCTAGCGGGTGGCAGGACCAAAACCTGGCTGGTTGGGAACAAGCTTGCTACTGTGACGACAAGCGTGG  
GAACCGGGACCCGGTCGTTACTAGGCCTGGACTCGGGGGAGCTGCAGTCCGGCCCCGAGTCGAGCTCCAG  
CCCCGGGGTGATGTGAGACAGACCAAGGAGGCGCCGGCCAAGCTGGAGTCCCAGGCTGGGCAGCAGGTG  
TCCCGTGGGGCCCGGGATCGGGTCCGTTCCATGTCGGGGGGCCATGGTCTTCGAGTTGGCGCCCTGGACG  
TGCCGGCCTCCCAGTTCCTGGGCAGTGCCACTTCTCCAGGACCACGGACTGCACCAGCCGCGAAACCTGA  
GAAGGCCTCAGCTGGCACCCGGGTTCTGTGCAGGAGAAGACGAACCTGGCGGCCTATGTGCCCTGCTG  
ACCCAGGGCTGGGCGGAGATCCTGGTCCGGAGGCCACAGGGAACACCAGCTGGCTGATGAGCCTGGAGA  
ACCCGCTCAGCCCTTCTCCTCGGACATCAACAACATGCCCTGCAGGAGCTGTCTAACGCCCTCATGGC  
GGCTGAGCGCTTCAAGGAGCACCGGGACACAGCCCTGTACAAGTCACTGTCGGTGCCGGCAGCCAGCACG  
GCCAAACCCCTCCTCTGCCTCGCTCCAACACAGTGGCCTCTTCTCCTCCCTGTACCAGTCCAGTGCC  
AAGGACAGCTGCACAGGAGCGTTTCCTGGGCAGACTCCGCCGTGGTCATGGAGGAGGGAAGTCCGGGCGA  
GGTTCCTGTGCTGGTGGAGCCCCAGGGTTGGAGGACGTTGAGGCAGCGCTAGGCATGGACAGGCGCACG  
GATGCCTACAGCAGGTCGTCCTCAGTCTCCAGCCAGGAGGAGAAGTCGCTCCACGCGGAGGAGCTGGTTG  
GCAGGGGCATCCCCATCGAGCGAGTCGTCTCCTCGGAGGGTGGCCGGCCCTCTGTGGACCTCTCCTTCCA  
GCCCTCGAGCCCCTGAGCAAGTCCAGCTCCTCTCCGAGCTGCAGACTCTGCAGGACATCCTCGGGGAC

CCTGGGGACAAGGCCGACGTGGGCCGGCTGAGCCCTGAGGTTAAGGCCCGGTCACAGTCAGGGACCCTGG  
ACGGGGAAAGTGCTGCCTGGTCGGCCTCGGGCGAAGACAGTCGGGGCCAGCCCGAGGGTCCCTTGCCTTC  
CAGCTCCCCCGCTCGCCCAGTGGCCTCCGGCCCCGAGGTTACACCATCTCCGACTCGGCCCCATCACGC  
AGGGGCAAGAGAGTAGAGAGGGACGCCTTAAAGAGCAGAGCCACAGCCTCCAATGCAGAGAAAGTGCCAG  
GCATCAACCCAGTTTCGTGTTCTGCAGCTCTACCATTCCCCCTTCTTTGGCGACGAGTCAAACAAGCC  
AATCCTGCTGCCAATGAGTCACAGTCCTTTGAGCGGTGCGTGCAGCTCCTCGACCAGATCCCATCATAC  
GACACCCACAAGATCGCCGTCTGTATGTTGGAGAAGGCCAGAGCAACAGCGAGCTCGCCATCCTGTCCA  
ATGAGCATGGCTCCTACAGGTACACGGAGTTCCTGACGGGCCTGGGCCGGCTCATCGAGCTGAAGGACTG  
CCAGCCGGACAAGGTGTACCTGGGAGGCCTGGACGTGTGTGGTGAGGACGGCCAGTTCACCTACTGCTGG  
CACGATGACATCATGCAAGCCGTCTTCCACATCGCCACCCTGATGCCCACCAAGGACGTGGACAAGCACC  
GCTGCGACAAGAAGCGCCACCTGGGCAACGACTTTGTGTCCATTGTCTACAATGACTCCGGTGAGGACTT  
CAAGCTTGGCACCATCAAGGGCCAGTTCAACTTTGTCCACGTGATCGTCACCCCGCTGGACTACGAGTGC  
AACCTGGTGTCCCTGCAGTGCAGGAAAGACATGGAGGGCCTTGTGGACACCAGCGTGGCCAAGATCGTGT  
CTGACCGCAACCTGCCCTTCGTGGCCCGCCAGATGGCCCTGCACGCAAATATGGCCTCACAGGTGCATCA  
TAGCCGCTCCAACCCACCGATATCTACCCCTCCAAGTGGATTGCCCCGGCTCCGCCACATCAAGCGGCTC  
CGCCAGCGGATCTGCGAGGAAGCCGCCTACTCCAACCCAGCCTACCTCTGGTGACCCCTCCGTCCATA  
GCAAAGCCCCTGCACAGACTCCAGCCGAGCCCACACCTGGCTATGAGGTGGGCCAGCGGAAGCGCCTCAT  
CTCCTCGGTGGAGGACTTCACCGAGTTTGTGTGA

>|cl|NM\_001004125.3\_cds\_NP\_001004125.2\_1 [gene=TUSC1] [db\_xref=CCDS:CCDS34999.1]  
[protein=tumor suppressor candidate gene 1 protein] [protein\_id=NP\_001004125.2] [location=133..762]  
[gbkey=CDS]

ATGTGGCGCATGCGTGGTGGCGCCACTAGGCGCGGGAGTTGCTGCGGCGGGGACGGTGCTGCGGACGGCC

GAGGGCCAGGCCGCTCCGGCCGGGCTCGTGGTGGGGGCAGCCCCAGCGGGCGGCGGCGGCGTGGGCTG  
GCGAGGCCGCGCGGACGGCGCCCCACAGCAGCTGGAGGAGCGGTTTGCCGACCTGGCGGCGAGCCACTTG  
GAGGCCATCCGTGCGCGGGACGAGTGGGACCGGCAGAACGCGCGGCTGCGTCAGGAGAACGCCCGGCTGC  
GGCTCGAGAACCGGCGGCTGAAGCGCGAGAACCGCAGCCTCTTCCGTCAGGCTTTGCGGCTCCCCGGCGA  
AGGCGGCAACGGGACGCCCGGGAGGCACGCCGGGTCCCTGAAGAGGCCAGCACGAACCGGAGGGGCTAGA  
GACAGCGGCCGAGAGGACGAGCCGGGCAGCCCCAGGGCCCTGAGGGCCCGACTTGAGAAGCTGGAAGCCA  
TGTACCGCCGGGCCCTGCTGCAGCTGCACCTCGAGCAGCGGGGACCACGTCCGAGCGGGGACAAGGAGGA  
GCAGCCTCTACAGGAACCCGACTCCGGCCTCCGCTCCCGGGACTCGGAGCCCTCTGGGCCCTGGCTGTAG

>|cl|NM\_003565.4\_cds\_NP\_003556.2\_1 [gene=ULK1] [db\_xref=CCDS:CCDS9274.1]  
[protein=serine/threonine-protein kinase ULK1] [protein\_id=NP\_003556.2] [location=381..3533]  
[gbkey=CDS]

ATGGAGCCCGGCCGCGGCGGCACAGAGACCGTGGGCAAGTTCGAGTTCTCCCGCAAGGACCTGATCGGCC  
ACGGCGCCTTCGCGGTGGTCTTCAAGGGCCGCCACCGCGAGAAGCACGATTTGGAGGTCGCCGTCAAGTG  
CATTAACAAGAAGAACCTCGCCAAGTCTCAGACGCTGCTGGGGAAGGAAATCAAAATCCTGAAGGAACTG  
AAACATGAAAACATCGTGGCCCTGTACGACTTCCAGGAAATGGCTAATTCTGTCTACCTGGTTATGGAGT  
ACTGCAACGGTGGGGACCTGGCCGACTACCTGCACGCCATGCGCACGCTGAGCGAGGACACCATCAGGCT  
CTTCCTGCAGCAGATCGCGGGCGCCATGCGGCTTCTGCACAGCAAAGGCATCATCCACCGCGACCTGAAA  
CCGCAGAACATCCTGCTGTCCAACCCCGCCGGCCGCCGCGCCAACCCCAACAGCATCCGCGTCAAGATCG  
CTGACTTCGGCTTCGCGCGGTACCTCCAGAGCAACATGATGGCGGCCACACTCTGCGGCTCCCCATGTA  
CATGGCCCCCGAGGTCATCATGTCCCAGCACTACGACGGGAAGGCGGACCTGTGGAGCATCGGCACCATC  
GTCTACCAGTGCCTGACGGGGAAGGCGCCCTTCCAGGCCAGCAGCCCCAGGACCTGCGCCTGTTCTACG  
AGAAGAACAAGACGTTGGTCCCCACCATCCCCGGGAGACCTCGGCCCCGCTGCGGCAGCTGCTCCTGGC

CCTACTGCAACGCAACCACAAGGACCGCATGGACTTCGATGAGTTTTTTCATCACCTTTCTCGATGCC  
AGCCCCTCGGTACAGGAAATCCCCACCCGTGCCTGTGCCCTCGTACCCAAGCTCGGGGTCCGGCAGCAGCT  
CCAGCAGCAGCTCCACCTCCCACCTGGCCTCCCCGCCGTCCCTGGGCGAGATGCAGCAGCTGCAGAAGAC  
CCTGGCCTCCCCGGGTGACACCGCTGGCTTCCTGCACAGCTCCCGGGACTCTGGTGGCAGCAAGGACTCT  
TCCTGTGACACAGACGACTTCGTCATGGTCCCCGCGCAGTTTCCAGGTGACCTGGTGGCTGAGGCGCCCA  
GTGCCAAACCCCCGCCAGACAGCCTGATGTGCAGTGGGAGCTCACTGGTGGCCTCTGCGGGCTTGGAGAG  
CCACGGCCGGACCCCATCTCCATCCCCACCTGCAGCAGCTCCCCAGTCCCTCAGGCCGGGTGGCCCCG  
TTCTCCAGCAGCAGGTGCGGCGCCTCTGTCCCCATCCCAGTCCCCACGCAGGTGCAGAACTACCAGCGCA  
TTGAGCGAAACCTGCAGTCACCCACCCAGTTCCAAACACCTCGGTCCCTCTGCCATCCGCAGGTCAGGCAG  
CACCAGCCCCCTGGGCTTTGCAAGGGCCAGCCCCTCGCCCCCTGCCACGCTGAGCATGGAGGCGTCTCTG  
GCCAGGAAGATGTCTCTGGGTGGAGGCCGGCCCTACACGCCATCTCCTCAAGTTGGAACCATCCCTGAGC  
GGCCAGGCTGGAGCGGGACGCCCTCCCCACAGGGAGCTGAGATGCGGGGTGGCAGGTCCCCTCGTCCAGG  
CTCCTCTGCACCCGAGCACTCTCCCCGCACTTCGGGGCTGGGCTGCCGCCTGCACAGCGCCCCAACCTG  
TCTGACTTGACGTCGTCCGCCCCAAGCTGCCCAAACCCCCACGGACCCCCTGGGAGCTGTGTTAGCC  
CACCACAGGCCAGCCCTCCCCAGCCGTCCACGGCCTGCAGTCCTGCCGGAACCTGCGGGGCTACCCAA  
GCTGCCCCGACTTCCTGCAGCGAAACCCCCTGCCCCCATCCTGGGCTCCCCACCAAGGCTGTGCCCTCC  
TTTGACTTCCCGAAGACCCCCAGCTCCCAGAACCTGCTGGCCCTCCTAGCCCGGCAGGGCGTGGTGATGA  
CGCCCCCTCGAAACCGGACGCTGCCCCGACCTCTCGGAGGTGGGACCCTTCCATGGTCAGCCGTTGGGCCC  
TGGCCTGCGGCCAGGCGAGGACCCCAAGGGCCCCTTTGGCCGGTCTTTCAGCACCAAGCCGCTCACTGAC  
CTGCTCCTTAAGGCGGCGTTTGGGACACAAGCCCCGGACCCGGGCAGCACGGAGAGCCTGCAGGAGAAGC  
CCATGGAGATCGCACCTCAGCTGGCTTTGGAGGGAGCCTGCACCCAGGAGCCCGTGCTGGGGGCACCAG  
CAGCCCTTCCCCGGTGGTCTTACCGTGGGCTCTCCCCGAGCGGGAGCACGCCCCCAGGGCCCCCGC  
ACCAGGATGTTCTCAGCGGGCCCCACTGGCTCTGCCAGCTCTTCTGCCCGCCACCTGGTGCCTGGGCCCT  
GCAGCGAGGCCCCAGCCCCTGAGCTCCCTGCTCCAGGACACGGCTGCAGCTTTGCCGACCCATTACTGC  
GAACCTGGAGGGGGCTGTGACCTTCGAGGCCCCGACCTCCCTGAGGAGACCCTCATGGAGCAAGAGCAC

ACGGAGATCCTGCGTGGCCTGCGCTTCACGCTGCTGTTTCGTGCAGCACGTCTGGAGATCGCAGCCCTGA  
AGGGCAGCGCCAGTGAGGCGGCGGGGGGCCCTGAGTACCAGCTGCAGGAGAGTGTGGTGGCCGACCAGAT  
CAGCCTGCTGAGCCGAGAATGGGGCTTCGCGGAACAGCTGGTGCTGTACCTGAAGGTGGCCGAGCTACTG  
TCCTCCGGCCTGCAAAGTGCCATCGACCAGATCCGGGCGGCAAGCTCTGCCTGTCGTCCACTGTGAAGC  
AGGTGGTGC GCAGGCTGAATGAGCTGTACAAGGCCAGCGTGGTGTCTGCCAGGGCCTGAGCCTGCGGCT  
GCAGCGCTTCTTCTGGACAAGCAGCGGCTCCTGGACCGCATTACAGCATCACTGCCGAGAGGCTCATC  
TTCAGCCACGCTGTGCAGATGGTGCAGTCGGCTGCCCTGGACGAGATGTTCCAGCACCGTGAGGGCTGCG  
TCCCACGCTACCACAAGGCCCTGCTGCTCCTGGAGGGGCTGCAGCACATGCTCTCGGACCAGGCCGACAT  
CGAGAACGTCACCAAGTGCAAGCTGTGCATTGAGCGGAGACTCTCGGCGCTGCTGACTGGCATCTGTGCC  
TGA

>|cl|NM\_014683.4\_cds\_NP\_055498.3\_1 [gene=ULK2] [db\_xref=CCDS:CCDS11213.1]  
[protein=serine/threonine-protein kinase ULK2] [protein\_id=NP\_055498.3] [location=520..3630]  
[gbkey=CDS]

ATGGAGGTGGTGGGTGACTTCGAGTACAGCAAGAGGGATCTCGTGGGACACGGGGCCTTCGCCGTGGTCT  
TCCGGGGGCGGCACCGCCAGAAAAGTATTGGGAGGTAGCTATTAAGTATTAATAAAAAGAACTTGTC  
AAAATCACAAATACTGCTTGAAAGGAAATTAATCTTAAAGGAACCTCAGCATGAAAATATTGTAGCA  
CTCTATGATGTTTCAGGAATTACCCAACTCTGTCTTTTTGGTGATGGAGTATTGCAATGGTGGAGACCTCG  
CAGATTATTTGCAAGCGAAAGGGACTCTCAGTGAAGACACGATCAGAGTGTTTCTGCATCAGATTGCTGC  
TGCCATGCGAATCCTGCACAGCAAAGGAATCATCCACAGAGATCTCAAACCACAGAACATCTTGCTGTCC  
TATGCCAATCGCAGAAAATCAAGTGTCAGTGGTATTCGCATCAAATAGCGGATTTTGGTTTTGCTCGTT  
ACCTACATAGTAACATGATGGCTGCAAACTGTGTGGATCCCCGATGTACATGGCTCCTGAGGTTATTAT  
GTCTCAACATTATGATGCTAAGGCTGACTTGTGGAGCATAGGAACAGTGATATACCAATGCCTAGTTGGA

AAACCACCTTTTCAGGCCAATAGTCCTCAAGACTTAAGGATGTTTTATGAAAAAACAGGAGCTTAATGC  
CTAGTATTTCCAGAGAAACATCACCTTATTTGGCTAATCTCCTTTGGGTTTGCTTCAGAGAAACAAAA  
AGATAGAATGGACTTTGAAGCATTTTTTAGCCATCCTTTCTTGAGCAAGGTCCAGTAAAAAATCTTGC  
CCAGTTCAGTGCCCATGTATTCTGGTTCTGTCTCTGGAAGCTCCTGTGGCAGCTCTCCATCTTGTCGTT  
TTGCTTCTCCACCATCCCTCCAGATATGCAGCATATTCAGGAAGAAACTTATCTTCCCCACCATTTGGG  
TCCTCCCAACTATCTACAAGTTTCAAAGATTCTGCCAGTACTAGTAGCAAGAACTCTTCTTGACACG  
GATGACTTTGTTTTGGTGCCACACAACATCTCGTCAGACCACTCATGTGATATGCCAGTGGGGACTGCTG  
GCAGACGTGCTTCAAATGAATTCTTGGTGTGTGGAGGGCAGTGTGAGCCTACTGTGTACCTCACAGCGA  
AACAGCACCAATTCCAGTTCCTACTCAAATAAGGAATTATCAGCGCATAGAGCAGAATCTTACATCTACT  
GCCAGCTCAGGCACAAATGTACATGGTTCTCCAAGATCTGCAGTGGTACGAAGGTCCAACACCAGCCCCA  
TGGGCTTCTCCGGCCGGGATCATGCTCCCCAGTACCAGCAGACACAGCACAGACAGTTGGACGAAGGCT  
CTCCACTGGGTCTTCTAGGCCTTACTCACCTTCCCCTTTGGTTGGTACCATTCTGAGCAATTCAGTCAG  
TGCTGCTGTGGGCATCCTCAGGGCCATGACTCCAGGAGTAGAACTCCTCAGGTTCTCCAGTGCCACAAG  
CTCAGTCCCCACAGTCTCTTATCGGGTGCTAGACTGCAGAGCGCCCCACCCTCACTGACATCTATCA  
GAACAAGCAGAAGCTCAGAAAACAGCACTCTGACCCCGTGTGCCCATCCCATACTGGGGCTGGGTACAGC  
TACTCGCCTCAGCCCAGTCGGCCTGGCAGCCTTGAACTTCTCCCACCAAGCACTTGGGGTCTCTCCAC  
GGAGTTCTGACTGGTTCTTTAAACTCCTTTGCCAACAATCATTGGCTCTCCTACTAAGACCACAGCTCC  
TTTCAAATCCCTAAACTCAAGCATCTTCCAACCTGTTAGCCTTGGTTACTCGTCATGGGCCTGCTGAA  
GAACAGTCGAAAGATGGGAATGAGCCACGGGAATGTGCCATTGCCTCTTAGTGCAAGGAAGTGAGAGGC  
AGCGGGCCGAGCAGCAGAGCAAGGCAGTGTTTGGCAGATCTGTCAGTACCGGGAAGTTATCAGATCAACA  
AGGAAAGACTCCTATATGTGACATCAGGGCAGCACAGACAGTTTAAATACAGAACGACCAATGGATATA  
GCTCCGGCAGGAGCCTGTGGTGGTGTCTGGCACCTCCTGCAGGTACAGCAGCAAGTTCCAAGGCTGTCC  
TCTTCACTGTAGGGTCTCCTCCACACAGTGCGGCAGCCCCCACTTGTACCCACATGTTCTTCGAACAAG  
AACAACCTCAGTGGGGCCAGCAACTCCGGGGGCTCTTTGTGCCATGAGTGGCCGCGTGTGCGTGGGG  
TCCCCGCTGGCCAGGCTTCGGCTCTTCCCCTCCAGGAGCAGAGGCAGCTCCAGCCTGAGATACGTGC

CTTACGGTGCTTCACCCCCAGCCTAGAGGGGCTCATCACCTTTGAAGCCCCTGAACTGCCGGAGGAGAC  
GCTGATGGAGCGGGAACACACAGACACCTTACGCCATCTGAATGTGATGCTGATGTTCACTGAGTGTGTG  
CTGGACCTGACAGCCATGAGGGGAGGAAACCCTGAGCTGTGCACATCTGCTGTGTCCTTGTACCAGATCC  
AGGAGAGTGTGGTGGTGGACCAGATCAGTCAGCTGAGCAAAGACTGGGGGCGGGTGGAGCAGCTGGTGT  
GTACATGAAAGCAGCACAGCTGCTTGCGGCTTCTCTGCATCTTGCCAAAGCCCAGATCAAGTCCGGGAAA  
CTGAGCCCATCCACAGCTGTGAAACAAGTTGTCAAGAATCTGAACGAACGATATAAATTCTGCATCACCA  
TGTGCAAGAACTTACAGAAAAGCTGAATCGATTCTTCTCTGACAAACAGAGTTTATTGATGAAATCAA  
CAGTGTGACTGCAGAGAACTCATCTATAATTGTGCTGTAGAAATGGTTCAGTCTGCAGCCCTGGATGAG  
ATGTTTCAGCAGACCGAAGATATTGTTTATCGCTATCATAAGGCAGCCCTTCTTTTGGAAGGCCTAAGTA  
GGATTCTACAGGACCCTGCAGATATTGAAAATGTGCATAAATATAAATGTAGTATTGAGAGAAGACTGTC  
GGCGCTCTGCCATAGCACCGCAACCGTGTGA

>|cl|NM\_001099436.4\_cds\_NP\_001092906.3\_1 [gene=ULK3] [db\_xref=CCDS:CCDS45305.1]  
[protein=serine/threonine-protein kinase ULK3 isoform a] [protein\_id=NP\_001092906.3]  
[location=52..1470] [gbkey=CDS]

ATGGCGGGGCCCCGGCTGGGGTCCCCGCGCCTGGACGGCTTCATCCTCACCGAGCGCCTGGGCAGCGGCA  
CGTACGCCACGGTGTACAAGGCCTACGCCAAGAAGGACACTCGTGAAGTGGTAGCCATAAAGTGTGTAGC  
CAAGAAAAGTCTGAACAAGGCATCGGTGGAGAACCTCCTCACGGAGATTGAGATCCTCAAGGGCATTCTGA  
CATCCCCACATTGTGCAGCTGAAAGACTTTCAGTGGGACAGTGACAATATCTACCTCATCATGGAGTTTT  
GCGCAGGGGGCGACCTGTCTCGCTTCATCCATACCCGCAGGATTCTGCCTGAGAAGGTGGCGCGTGTCTT  
CATGCAGCAATTAGCTAGCGCCCTGCAATTCCTGCATGAACGGAATATCTCTCACCTGGATCTGAAGCCA  
CAGAACATTCTACTGAGCTCCTTGGAGAAGCCCCACCTAAACTGGCAGACTTTGGTTTCGCACAACACA  
TGTCCCCGTGGGATGAGAAGCACGTGCTCCGTGGCTCCCCCTCTACATGGCCCCCGAGATGGTGTGCCA

GCGGCAGTATGACGCCCCGCTGGACCTCTGGTCCATGGGGGTCATCCTGTATGAAGCCCTCTTCGGGCAG  
CCCCCTTTGCCTCCAGGTCGTTCTCGGAGCTGGAAGAGAAGATCCGTAGCAACCGGGTCATCGAGCTCC  
CCTTGCGGCCCCCTGCTCTCCCGAGACTGCCGGGACCTACTGCAGCGGCTCCTGGAGCGGGACCCAGCCG  
TCGCATCTCCTTCCAGGACTTTTTTGCGCACCCCTGGGTGGACCTGGAGCACATGCCCAGTGGGGAGAGT  
CTGGGGCGAGCAACCGCCCTGGTGGTGCAGGCTGTGAAGAAAGACCAGGAGGGGGATTTCAGCAGCTGCCT  
TATCACTCTACTGCAAGGCTCTGGACTTCTTTGTACCTGCCCTGCACTATGAAGTGGATGCCAGCGGAA  
GGAGGCAATTAAGGCAAAGGTGGGGCAGTACGTGTCCCGGGCTGAGGAGCTCAAGGCCATCGTCTCCTCT  
TCCAATCAGGCCCTGCTGAGGCAGGGGACCTCTGCCCAGACCTGCTCAGAGAGATGGCCCGGGACAAGC  
CACGCCTCCTAGCTGCCCTGGAAGTGGCTTCAGCTGCCATGGCCAAGGAGGAGGCCCGCGGGGAGCA  
GGATGCCCTGGACCTGTACCAGCACAGCCTGGGGGAGCTACTGCTGTTGCTGGCAGCGGAGCCCCGGGC  
CGGAGGCGGGAGCTGCTTCACACTGAGGTTCAGAACCTCATGGCCCGAGCTGAATACTTGAAGGAGCAGG  
TCAAGATGAGGGAATCTCGCTGGGAAGCTGACACCCTGGACAAAGAGGGACTGTCCGAATCTGTTCTGTAG  
CTCTTGACCCCTTCAGTGA

>|cl|NM\_001272075.2\_cds\_NP\_001259004.1\_1 [gene=USP10] [db\_xref=CCDS:CCDS62004.1]  
[protein=ubiquitin carboxyl-terminal hydrolase 10 isoform 1] [protein\_id=NP\_001259004.1]  
[location=201..2609] [gbkey=CDS]

ATGCCCTGGTTGCCCTCTCCTGGAATAGGGCAGTATATTTTTGGAGATTTTAGCCCTGATGAATTCAATC  
AATTCTTTGTGACTCCTCGATCTTCAGTTGAGCTTCCTCCATACAGTGGAACAGTTCTGTGTGGCACACA  
GGCTGTGGATAAACTACCTGATGGACAAGAATATCAGAGAATTGAGTTTGGTGTGATGAAGTCATTGAA  
CCCAGTGACACTTTGCCGAGAACCCCCAGCTACAGTATTTCAAGCACACTGAACCCTCAGGCCCTGAAT  
TTATTCTCGGTTGTACAGCTTCCAAAATAACCCCTGATGGTATCACTAAAGAAGCAAGCTATGGCTCCAT  
CGACTGCCAGTACCCAGGCTCTGCCCTCGCTTTGGATGGAAGTTCTAATGTGGAGGCGGAAGTTTTGGAA

AATGATGGTGTCTCAGGTGGTCTTGGACAAAGGGAGCGTAAAAAGAAGAAAAAGCGGCCACCTGGATATT  
ACAGCTATTTGAAAGATGGTGGCGATGATAGTATCTCCACAGAAGCCCTGGTCAATGGCCATGCCAATTC  
AGCAGTCCCGAACAGTGTCAGTGCAGAGGATGCAGAATTTATGGGTGACATGCCCCGTCAGTTACGCCC  
AGGACTTGTAACAGCCCCAGAACTCCACAGACTCTGTCAGTGACATTGTGCCTGACAGTCCTTTCCCCG  
GAGCACTCGGCAGTGACACCAGGACTGCAGGGCAGCCAGAGGGGGGCCCCGGGGCTGATTTTGGTCAGTC  
CTGCTTCCCTGCAGAGGCTGGCAGAGACACCCTGTCAAGGACAGCTGGGGCTCAGCCCTGCGTTGGTACC  
GATACTACTGAAAACCTTGGAGTTGCTAATGGACAAATACTTGAATCCTCGGGTGAGGGCACAGCTACCA  
ACGGGGTGGAGTTGCACACCACGGAAAGCATAGACTTGGACCCAACCAAAACCCGAGAGTGCATCACCTCC  
TGCTGACGGCACGGGCTCTGCATCAGGCACCCCTTCTGTCAAGCCAGCCCAAGTCCTGGGCCAGCCTCTTT  
CATGATTCTAAGCCCTCTTCTCCTCGCCGGTGGCCTATGTGGAACTAAGTATTCCCCTCCCGCCATAT  
CTCCCCTGGTTTCTGAAAAGCAGGTTGAAGTCAAAGAAGGGCTTGTTCCGGTTTCAGAGGATCCTGTAGC  
CATAAAGATTGCAGAGTTGCTGGAGAATGTAACCCTAATCCATAAACCAGTGTGTTGCAACCCCGTGGG  
CTGATCAATAAAGGGAAGTGGTGCTACATTAATGCTACACTGCAGGCATTGGTTGCTTGCCCCCGATGT  
ACCACCTGATGAAGTTCATTCTCTGTATTCCAAAGTGCAAAGGCCTTGACGTCAACACCCATGATAGA  
CAGCTTTGTTTCGGCTAATGAATGAGTTCACTAATATGCCAGTACCTCCAAAACCCGACAAGCTCTTGGA  
GATAAAATCGTGAGGGATATTCGCCCTGGAGCTGCCTTTGAGCCCACATATATTTACAGACTCCTGACAG  
TTAACAAGTCAAGCCTGTCTGAAAAGGGTCGACAAGAAGATGCTGAGGAATACTTAGGCTTCATTCTAAA  
TGGACTTCATGAGGAAATGTTGAACCTAAAGAAGCTTCTCTACCAAGTAATGAAAACTTACGATTTC  
AACGGCCCCAAAAACCACTCGGTCAATGAAGAAGAGCAGGAAGAACAAGGTGAAGGAAGCGAGGATGAAT  
GGGAACAAGTGGGCCCCCGGAACAAGACTTCCGTCACCCGCCAGGCGGATTTTGTTCAGACTCCAATCAC  
CGGCATTTTGGTGGACACATCAGGTCTGTGGTTTACCAGCAGAGTTCAAAGAATCTGCCACTTTGCAG  
CCATTTTTCAGTTGCAGTTGGATATCCAGTCAGACAAGATACGCACAGTCCAGGATGCACTGGAGAGCT  
TGGTGGCAAGAGAATCTGTCCAAGGTTATACCACAAAAACCAACAAGAGGTTGAGATAAGTCGAAGAGT  
GACTCTGGAAAACTCCCTCCTGTCTCGTGCTGCACCTGAAACGATTTCGTTTATGAGAAGACTGGTGGG  
TGCCAGAAGCTTATCAAAAATATTGAATATCCTGTGGACTTGGAATTAGTAAAGAACTGCTTCTCCAG

GGGTAAAAATAAGAATTTTAAATGCCACCGAACCTATCGGCTCTTTGCAGTGGTCTACCATCACGGCAA  
CAGTGCGACGGGCGGCCATTACACTACAGACGTCTTCCAGATCGGTCTGAATGGCTGGCTGCGCATCGAT  
GACCAGACAGTCAAGGTGATCAACCAGTACCAGGTGGTGAAACCAACTGCTGAACGCACAGCCTACCTCC  
TGTATTACCGCCGAGTGGACCTGCTGTAA

>|cl|NM\_003369.4\_cds\_NP\_003360.2\_1 [gene=UVRAG] [db\_xref=CCDS:CCDS8241.1] [protein=UV  
radiation resistance-associated gene protein isoform 2] [protein\_id=NP\_003360.2] [location=199..2298]  
[gbkey=CDS]

ATGAGCGCCTCCGCGTCGGTCGGGGGCCCCGTCCCCAGCCACCCCGGGCCCGGCCGCTGCTCTGCCTC  
CCGGTTCTGCCGCGCGGGCCCTGCATGTGGAGCTGCCGTCTCAGCAGCGGCGTCTTCGACATCTTCGGAA  
CATTGCTGCCCCGAACATTGTAAATAGAAATGGCCATCAGCTCCTTGATACCTACTTTACACTTCACTTG  
TGTAAGTACTGAAAAGATATATAAAGAATTTTATAGAAGTGAAGTGATTAAGAATTCCTGAATCCCACGT  
GGCGAAGTCTCGATTTTGGAATTATGCCAGACCGTCTTGATACATCTGTGTCTTGTTTCGTGGTGAAGAT  
ATGGGGTGGAAGGAGAACATCTACCAGCTGTTGATTGAATGGAAAGTCTGTTTGGATGGGCTGAAATAC  
TTGGGTGAGCAGATTATGCCCGAAACCAAATGAAATAATTTTGGGCTGAATGATGGATACTATGGTG  
CTCCATTTGAACATAAGGGTTATTCAAATGCTCAGAAGACTATTCTTCTGCAGGTGGATCAGAACTGTGT  
TCGCAATTCTTACGATGTCTTCTTTGCTACGGCTTCATAGAGCCAGTGTGCAATTAAACAGACTCAG  
GTAAGTGTTCAGAAAATTGGAAAGGAAATTGAAGAAAAACTAAGACTCACATCTACAAGCAATGAACTGA  
AAAAAAAAAAGTGAATGCCTGCAGTTAAAAATTTGGTGCTTCAGAATGAACTGGAACGGCAGAAGAAAGC  
TTTGGGACGGGAGGTGGCATTACTGCATAAGCAACAAATTGCATTACAAGACAAAGGAAGTGCATTTTCA  
GCTGAGCACCTCAAACCTCAACTCCAGAAGGAATCCCTAAATGAGCTGAGGAAGGAGTGCCTGCAAAAA  
GAGAACTCTTCTGAAGACTAATGCTCAGTTGACAATTCGTTGCAGGCAGTTACTCTCTGAGCTTTCCTA  
CATTTACCCTATTGATTTGAATGAACATAAGGATTACTTTGTATGCGGTGTCAAGTTGCCTAATTCTGAG

GACTTCCAAGCAAAAGATGATGGAAGCATTGCTGTTGCCCTTGGTTATACTGCACATCTGGTCTCCATGA  
TTTCCTTTTTCTACAAGTGCCCTCAGATATCCTATAATTCATAAGGGGTCTAGATCAACAATCAAAGA  
CAATATCAATGACAACTGACGGAAAAGGAGAGAGAGTTTCCACTGTATCCAAAAGGAGGGGAGAAGTTG  
CAGTTTGATTATGGTGTCTATCTTCTGAACAAAAATATAGCACAGCTAAGATATCAACATGGACTAGGGA  
CTCCAGACTTGCGGCAAACCTTCCCAACCTGAAAACTTCATGGAGCATGGACTAATGGTCAGGTGTGA  
CAGACATCACACCTCCAGTGCAATCCCTGTTCTAAGAGACAAAGCTCCATATTTGGGGGTGCAGATGTA  
GGCTTCTCTGGGGGGATCCCTTACCAGACAAAGGACATCGAAAACGGGCCAGCTCTGAGAATGAGAGAC  
TTCAGTACAAAACCCCTCCTCCCAGTTACAACCTCAGCATTAGCCCAGCCTGTGACCACCGTCCCCTCCAT  
GGGAGAGACCGAGAGAAAGATAACATCTCTATCCTCCTTGGATACCTCCTTGGACTTCTCCAAAGAA  
AACAAGAAAAAAGGAGAGGATCTAGTTGGCAGCTTAAACGGAGGCCACGCGAATGTGCACCCTAGCCAAG  
AACAAGGAGAAGCCCTCTCCGGGCACCGGGCCACAGTCAATGGCACTCTCCTACCCAGCGAGCAGGCCGG  
GTCCGCCAGTGTCCAGCTTCCAGGCGAGTTCCACCCAGTCTCAGAAGCTGAGCTCTGCTGTACTGTGGAG  
CAAGCAGAAGAAATCATCGGGCTGGAAGCCACAGGTTTCGCCTCAGGTGATCAGCTAGAAGCATTTAACT  
GCATCCCAGTGGACAGTGCTGTGGCAGTAGAGTGTGACGAACAAGTTCTGGGAGAATTTGAAGAGTTCTC  
CCGAAGGATCTATGCACTGAATGAAAACGTATCCAGCTTCCGCCGGCCGCGCAGGAGTTCCGATAAGTGA

>|cl|NM\_004781.4\_cds\_NP\_004772.1\_1 [gene=VAMP3] [db\_xref=CCDS:CCDS88.1] [protein=vesicle-associated membrane protein 3] [protein\_id=NP\_004772.1] [location=89..391] [gbkey=CDS]

ATGTCTACAGGTCCAACCTGCTGCCACTGGCAGTAATCGAAGACTTCAGCAGACACAAAATCAAGTAGATG  
AGGTGGTGGACATAATGCGAGTTAACGTGGACAAGGTTCTGGAAAGAGACCAGAAGCTCTCTGAGTTAGA  
CGACCGTGCAGACGCACTGCAGGCAGGCGCTTCTCAATTTGAAACGAGCGCAGCCAAGTTGAAGAGGAAA  
TATTGGTGGAGAATTGCAAGATGTGGGCAATCGGGATTACTGTTCTGGTTATCTTCATCATCATCATCA  
TCGTGTGGGTTGTCTCTTCATGA

>|cl|NM\_005638.6\_cds\_NP\_005629.1\_1 [gene=VAMP7] [db\_xref=CCDS:CCDS14770.4] [protein=vesicle-associated membrane protein 7 isoform 1] [protein\_id=NP\_005629.1] [location=114..776] [gbkey=CDS]

ATGGCGATTCTTTTGTGTTGTTGCCAGGGGACCACTATCCTTGCCAAACATGCTTGGTGTGGAGGAA  
ACTTCCTGGAGGTGACAGAGCAGATTCTGGCTAAGATACCTTCTGAAAATAACAACTAACGTACTCACA  
TGGCAATTATTTGTTTCATTACATCTGCCAAGACAGGATTGTATATCTTTGTATCACTGATGATGATTTT  
GAACGTTCCCGAGCCTTTAATTTTCTGAATGAGATAAAGAAGAGGTTCCAGACTACTTACGGTTCAAGAG  
CACAGACAGCACTTCCATATGCCATGAATAGCGAGTTCTCAAGTGTCTTAGCTGCACAGCTGAAGCATCA  
CTCTGAGAATAAGGGCCTAGACAAAGTGATGGAGACTCAAGCCCAAGTGGATGAACTGAAAGGAATCATG  
GTCAGAAACATAGATCTGGTAGCTCAGCGAGGAGAAAGATTGGAATTATTGATTGACAAAACAGAAAATC  
TTGTGGATTCTTCTGTACCTTCAAACTACCAGCAGAAATCTTGCTCGAGCCATGTGTATGAAGAACCT  
CAAGCTCACTATTATCATCATCATCGTATCAATTGTGTTCATCTATATCATTGTTTCACCTCTCTGTGGT  
GGATTTACATGGCCAAGCTGTGTGAAGAAATAG

>|cl|NM\_001025366.3\_cds\_NP\_001020537.2\_1 [gene=VEGFA] [db\_xref=CCDS:CCDS34457.1]  
[protein=vascular endothelial growth factor A isoform a] [protein\_id=NP\_001020537.2]  
[location=497..1735] [gbkey=CDS]

CTGACGGACAGACAGACAGACACCGCCCCAGCCCCAGCTACCACCTCCTCCCCGGCCGGCGGGCGGACAG  
TGGACGCGGGCGGCGAGCCGCGGGCAGGGGCCGGAGCCCGCGCCCGGAGGCGGGGTGGAGGGGGTCGGGGC  
TCGCGGGCGTCGCACTGAACTTTTCGTCCAACCTTCTGGGCTGTTCTCGCTTCGGAGGAGCCGTGGTCCGC  
GCGGGGGAAGCCGAGCCGAGCGGAGCCGCGAGAAGTGCTAGCTCGGGCCGGGAGGAGCCGCAGCCGGAGG

AGGGGGAGGAGGAAGAAGAGAAGGAAGAGGAGAGGGGGCCGCAGTGGCGACTCGGCGCTCGGAAGCCGGG  
CTCATGGACGGGTGAGGCGGCGGTGTGCGCAGACAGTGCTCCAGCCGCGCGCTCCCCAGGCCCTGGCC  
CGGGCCTCGGGCCGGGGAGGAAGAGTAGCTCGCCGAGGCGCCGAGGAGAGCGGGCCGCCACAGCCCGA  
GCCGGAGAGGGAGCGCGAGCCGCGCCGGCCCCGGTCGGGCCTCCGAAACCATGAACTTTCTGCTGTCTTG  
GGTGCATTGGAGCCTTGCCTTGCTGCTCTACCTCCACCATGCCAAGTGGTCCCAGGCTGCACCCATGGCA  
GAAGGAGGAGGGCAGAATCATCACGAAGTGGTGAAGTTCATGGATGTCTATCAGCGCAGCTACTGCCATC  
CAATCGAGACCCTGGTGGACATCTTCAGGAGTACCCTGATGAGATCGAGTACATCTTCAAGCCATCCTG  
TGTGCCCCTGATGCGATGCGGGGGCTGCTGCAATGACGAGGGCCTGGAGTGTGTGCCCACTGAGGAGTCC  
AACATCACCATGCAGATTATGCGGATCAAACCTACCAAGGCCAGCACATAGGAGAGATGAGCTTCCTAC  
AGCACAACAAATGTGAATGCAGACCAAAGAAAGATAGAGCAAGACAAGAAAAAAAAATCAGTTCGAGGAAA  
GGGAAAGGGGCAAAAACGAAAGCGCAAGAAATCCCGGTATAAGTCCTGGAGCGTGTACGTTGGTGCCCGC  
TGCTGTCTAATGCCCTGGAGCCTCCCTGGCCCCCATCCCTGTGGGCCTTGCTCAGAGCGGAGAAAAGCATT  
TGTTTGTACAAGATCCGCAGACGTGTAAATGTTCTGCAAAAACACAGACTCGCGTTGCAAGGCGAGGCA  
GCTTGAGTTAAACGAACGTACTTGCAAGTGTGACAAGCCGAGGCGGTGA

>|cl|NM\_030938.5\_cds\_NP\_112200.2\_1 [gene=VMP1] [db\_xref=CCDS:CCDS11619.1] [protein=vacuole  
membrane protein 1 isoform 1] [protein\_id=NP\_112200.2] [location=122..1342] [gbkey=CDS]

ATGGCAGAGAATGGAAAAAATTGTGACCAGAGACGTGTAGCAATGAACAAGGAACATCATAATGGAAATT  
TCACAGACCCCTCTTCAGTGAATGAAAAGAAGAGGAGGGAGCGGGAAGAAAGGCAGAATATTGTCCTGTG  
GAGACAGCCGCTCATTACCTGCAGTATTTTTCTTGAAATCCTTGTAATCTTGAAGGAATGGACCTCA  
AAATTATGGCATCGTCAAAGCATTGTGGTGTCTTTTTACTGCTGCTTGCTGTGCTTATAGCTACGTATT  
ATGTTGAAGGAGTGCATCAACAGTATGTGCAACGTATAGAGAAACAGTTTCTTTTGTATGCCTACTGGAT  
AGGCTTAGGAATTTTGTCTTCTGTTGGGCTTGGAACAGGGCTGCACACCTTCTGCTTTATCTGGGTCCA

CATATAGCCTCAGTTACATTAGCTGCTTATGAATGCAATTCAGTTAATTTTCCCGAACCCCTATCCTG  
ATCAGATTATTTGTCCAGATGAAGAGGGCACTGAAGGAACCATTTCTTTGTGGAGTATCATCTCAAAAGT  
TAGGATTGAAGCCTGCATGTGGGGTATCGGTACAGCAATCGGAGAGCTGCCTCCATATTTTCATGGCCAGA  
GCAGCTCGCCTCTCAGGTGCTGAACCAGATGATGAAGAGTATCAGGAATTTGAAGAGATGCTGGAACATG  
CAGAGTCTGCACAAGACTTTGCCTCCCGGGCCAACTGGCAGTTCAAAAAGTACAGAAAGTTGGATT  
TTTTGGAATTTTGGCCTGTGCTTCAATTCAAATCCTTTATTTGATCTGGCTGGAATAACGTGTGGACAC  
TTTCTGGTACCTTTTTGGACCTTCTTTGGTGCAACCCTAATTGGAAAAGCAATAATAAAAATGCATATCC  
AGAAAATTTTTGTTATAATAACATTCAGCAAGCACATAGTGGAGCAAATGGTGGCTTTCATTGGTGCTGT  
CCCCGGCATAGGTCCATCTCTGCAGAAGCCATTTCAGGAGTACCTGGAGGCTCAACGGCAGAAGCTTCAC  
CACAAAAGCGAAATGGGCACACCACAGGGAGAAAAGTGGTTGTCTGGATGTTTGAAAAGTTGGTCGTTG  
TCATGGTGTGTTACTTCATCCTATCTATCATTAAGTCCATGGCACAAAAGTTATGCCAAACGAATCCAGCA  
GCGGTTGAACTCAGAGGAGAAAAGTAAATAA

>|cl|NM\_014991.6\_cds\_NP\_055806.2\_1 [gene=WDFY3] [db\_xref=CCDS:CCDS3609.1] [protein=WD  
repeat and FYVE domain-containing protein 3] [protein\_id=NP\_055806.2] [location=708..11288]  
[gbkey=CDS]

ATGAACATGGTGAAGAGGATCATGGGGCGCCGAGGCAGGAGGAGTGCAGCCCACAAGACAACGCCTTAG  
GACTGATGCACCTCCGCCGGCTCTTCACGGAGTTGTGCCATCCTCCCCGGCACATGACTCAGAAGGAACA  
AGAAGAGAAAGTGTATATGATGCTGCCAGTGTTTAACAGGGTTTTTGAAATGCTCCGCCGAATACAATG  
ACAGAAAAATTTCTGATCTTCTGCAGTTCACAACACAAGTCTCACGACTAATGGTGACAGAAATTCGAA  
GGAGAGCATCAAACAAATCCACAGAGGCTGCAAGTCGGGCCATAGTTCAGTTCCTAGAGATTAATCAGAG  
TGAAGAAGCCAGTAGAGGCTGGATGCTTCTAACGACAATTAATTTGTTAGCTTCCTCTGGTCAGAAAACC  
GTGGACTGCATGACAACAATGTCAGTGCCTTCCACCCTGGTTAAATGTTTATATCTGTTTTTTGACCTTC

CACATGTGCCTGAGGCAGTTGGAGGTGCACAGAATGAGCTACCTCTAGCAGAACGTCGAGGACTACTCCA  
GAAAGTTTTTGTACAGATCTTAGTGAAACTGTGCAGTTTTGTTTCCCCTGCGGAGGAGCTGGCTCAGAAA  
GATGATCTCCAGCTTCTATTAGTGCAATAACCTCTTGGTGCCCTCCCTATAACCTGCCTTGGAGAAAAGA  
GTGCTGGAGAAGTCCTCATGACCATATCTCGTCATGGTCTTAGTGCAATGTAGTGAAGTATATTCATGA  
GAAAGAGTGTTTATCTACATGTGTTTCAGAATATGCAGCAATCAGATGACCTGTCTCCCCTAGAAAATTGTC  
GAAATGTTTGCTGGGCTTTCTTGTTTCCTCAAAGATTCCAGCGATGTTTCCCAAACACTTCTGGATGATT  
TTCGGATATGGCAAGGATATAATTTTCTTTGTGATCTCTTGCTTAGATTGGAACAAGCAAAAGAGGCAGA  
ATCCAAAGATGCCTTGAAAGATCTGGTTAATCTGATAACTTCCTAACAACATATGGTGTGAGTGAACCTA  
AAACCAGCTGGTATTACCACAGGGGCACCCTTTTTATTGCCTGGATTTGCAGTACCTCAGCCTGCAGGCA  
AAGGTCACAGTGTGAGAAACGTCCAGGCCTTTGCAGTTCTTCAGAATGCATTTTTAAAAGCAAAAACCAG  
CTTCCTTGCCCAAATCATCCTTGATGCTATCACAAATATTTACATGGCTGACAATGCCAATTACTTCATC  
CTAGAGTCACAGCACACATTGTCACAGTTTGCAGAGAAGATTTCTAAACTCCCAGAAGTACAAAACAAAT  
ACTTTGAGATGCTGGAGTTTGTTGTTTTAGCTTAAATTATATACCTTGTAAGAACTTATTAGTGTCAG  
TATCCTCTTAAATCTAGCTCTTCTTATCACTGTAGCATTATTGCAATGAAAACACTTCTTAAGTTTACA  
AGACATGACTACATATTTAAAGACGTGTTTCAGGGAGGTTGGCCTTTTGGAGGTCATGGTAAACCTTTTGC  
ATAAATATGCTGCCCTGTTGAAGGATCCAACCTCAGGCACTAAATGAACAAGGGGACTCAAGAAATAATAG  
TTCAGTTGAAGACCAAAAACACCTGGCTTTATTGGTTATGGAGACCTTGACAGTGCTTCTTCAAGGATCA  
AACACAAATGCAGGAATTTTTCGAGAATTTGGAGGTGCAAGATGTGCACATAATATAGTAAAGTACCCTC  
AATGCCGGCAGCATGCCTTGATGACTATCCAACAGCTGGTGCTCTCCCCAAATGGGGACGATGACATGGG  
CACTCTCCTGGGGCTAATGCATTAGCCCCACCGACGGAATTGCAGTTGAAGACTGATATTTTAAGGGCC  
CTCCTGTCGGTCCTTCGAGAAAGCCATCGTTCAAGAACAGTTTTTAGGAAAGTTGGAGGATTTGTGTACA  
TTACATCCTTGCTCGTTGCTATGGAAAGATCTTTGAGCTGTCCACCCAAGAATGGCTGGGAGAAAGTGAA  
CCAGAATCAAGTGTTTGAACCTTCTCACACTGTGTTCTGCACGTTGACTGCAGCAATGCGCTATGAGCCA  
GCCAACTCTCATTTCTTCAAAACAGAGATTAGTATGAGAAGTTGGCAGATGCTGTTGATTTCTTGGCT  
GCTTCTCAGACCTAAGAAAAATAAGCGCCATGAATGTCTTCCCCTCAAATACACAGCCATTTCAAAGACT

TTTAGAGGAAGATGTAATCTCAATAGAATCAGTGTACCCACGTTACGGCACTGCAGTAACTTTTTATT  
TATCTTTACAAAGTAGCCACAGATTCTTTTGACAGTCGTGCAGAACAGATCCCTCCTTGCCTGACAAGTG  
AGTCTTCTCTCCCCTCTCCTTGGGGTACACCAGCTTTGTCCAGGAAAAGGCATGCATATCATTCTGTTTC  
AACTCCCCCTGTTTACCCTCTAAAAATGTTGCCGACCTGAACTACATGTGACAACTTCATCTCTGCAG  
AGTTCTGATGCAGTCATCATTATCCTGGAGCCATGCTTGCCATGCTGGACCTACTGGCCTCTGTTGGGT  
CAGTGACACAGCCAGAACATGCTTTGGATCTTCAACTTGCCGTGGCAAATATTTTACAATCCCTGGTGCA  
CACAGAAAGGAACCAGCAAGTCATGTGTGAAGCTGGTCTTCATGCACGACTGCTGCAGAGGTGCAGTGCT  
GCATTGGCTGATGAGGACCACTCACTGCACCCGCCCTGCAGCGGATGTTTGAACGATTAGCCTCTCAGG  
CTCTGGAACCCATGGTGTGAGGGAGTTTTTACGTTTGGCAAGTCCTTTAAATTGTGGTGCCTGGGACAA  
AAAAGTCTAAAACAATATAGGGTCCACAAACCAAGTTCACTGAGTTATGAACCAGAAATGAGAAGTAGT  
ATGATCACATCTCTGGAAGGTCTGGGTACTGATAATGTTTTTAGCTTACATGAAGATAACCATTACCGGA  
TAAGCAAGAGCCTGGTAAAATCTGCGGAAGGAAGTACTGTACCCCTGACCAGGGTGAAGTGTCTGGTCTC  
CATGACAACCCACATGACATCAGACTTCATGGGTCATCAGTTACTCCAGCTTTTGTTGAATTTGACACA  
TCACTTGAAGGGTTTGGATGTCTTTTTTGGCCAGTTTGGCCCCTCATAATGCTCCTACAAATAATACCG  
TCACAACAGGTCTTATTGATGGGGCTGTGGTCAGTGGCATTGGTTCTGGTGAAAGATTCTTCCCTCCTCC  
CTCCGGCTTAAGTTACTCTAGCTGGTTTTGTATTGAACATTTTAGTTCTCCTCAAATAACCACCCTGTC  
AGACTTCTTACTGTTGTGCGCCGAGCAAATTCTTCTGAGCAACATTACGTGTGCCTTGCAATAGTTCTAT  
CAGCAAAAGACCGATCTCTGATTGTTCCACCAAAGAGGAACTCCTCCAAAATTATGTTGATGATTTTAG  
TGAAGAGTCCTCATTTTATGAAATTCTCCATGCTGTGCTCGCTTCGATGTGGAGAGCTTATCATTGAG  
GGACAGTGGCATCATTTGGTCTGGTAATGAGCAAAGGCATGTTGAAAAACAGTACTGCAGCCCTTTATA  
TTGATGGACAGCTTGTTAACTGTAAAGCTTCATTATGTCCACAGTACTCCAGGGGGTTCAGGTTCGGC  
AAATCCACCAGTGGTGAGCACGGTCTATGCCTACATTGGTACTCCACCTGCCAACGCCAAATTGCCTCA  
TTGGTTTGGCGCCTGGGACCCACACATTTTCTAGAAGAAGTTTTACCTTCTCAAATGTTACTACCATTT  
ATGAACTTGGACCAAATTATGTTGGAAGCTTTCAGGCTGTATGTATGCCATGTAAAGATGCAAAATCCGA  
AGGGGTGGTGCCATCCCCTGTGTCATTAGTACCAGAGGAGAAAGTGCATTTGGCCTCTATGCACTCTCT

GTGTCGTCTCTAACAGTGGCAAGAATCCGGAAAGTGTATAACAAATTGGATAGCAAAGCCATTGCTAAGC  
AGTTAGGCATTTCTCACATGAGAATGCCACTCCTGTGAAGTTGATACACAATTCAGCAGGACATCTTAA  
TGGATCTGCACGGACAATTGGGGCCGCTCTGATTGGATACTTGGGAGTAAGAACATTTGTCCCTAAGCCT  
GTTGCCACTACTTTGCAGTACGTTGGTGGAGCTGCAGCCATCCTGGGCCTGGTGGCCATGGCCTCTGATG  
TGGAAGGGTTATATGCAGCAGTCAAGGCCCTGGTTTGTGTGGTCAAGAGTAACCCACTAGCCAGCAAAGA  
AATGGAAAGAATCAAGGGCTACCAGTTGCTGGCAATGTTGCTTAAGAAGAAACGTTCCCTTCTTAACAGC  
CACATCCTCCATCTAACTTTTTCTTTGGTGGGAACTGTTGATAGTGGACATGAGACCTCCATTATTCCAA  
ATTCAACTGCTTTCCAGGACCTCCTCTGTGATTTTGAAGTCTGGCTCCATGCACCATATGAACTTCATCT  
TTCCTTATTTGAACACTTTATTGAACTGCTCACAGAGTCCAGTGAAGCCTCAAAGAATGCCAAATTAATG  
AGAGAATTCCAGTTAATCCCAAAGCTGCTCCTGACTCTTCGAGATATGTCTTTATCCCAGCCTACTATTG  
CTGCTATTAGTAATGTCCTGAGCTTCTTACTGCAAGGTTTTCTAGCAGCAATGATCTGCTCAGATTGG  
GCAGTTTATTTCTTCTACTTTGCCAACCTTTGCGGTTTGTGAGAAATTTGTAGTAATGGAAATAAATAAT  
GAAGAGAAGCTTGACACTGGAAGTGAAGAGGAGTTTGGAGGTCTTGTATCAGCTAATCTTATACTTTTGA  
GGAACAGACTTCTGGATATCTTGCTAAACTAATTTATACATCTAAAGAAAAGACAAGCATTAAATTTGCA  
AGCTTGTGAAGAACTGGTGAAGACACTGGGTTTTGACTGGATCATGATGTTTATGGAGGAACACTTACAT  
TCCACCACAGTTACAGCAGCCATGAGGATTCTTGTGTCTACTAAGTAATCAGTCTATTCTCATCAAGT  
TTAAAGAAGGACTCAGTGGTGGAGGATGGCTTGAACAGACAGATTCTGTCTTAACTAATAAGATTGGAAC  
TGTATTAGGATTCAACGTGGGCAGAAGTCTGGTGGGAGATCGACGGTCAGGGAGATTAACCGAGATGCT  
TGTCATTTTCTGGTTTTCCAGTCCTTCAGTCATTCCTTCTAAACACACTAATGTCCCTGCCCTCTATT  
TTCTCCTCATGGCCTTGTTTCTGCAGCAGCCAGTTAGTGAGCTGCCTGAGAACCTGCAGGTCAGTGTGCC  
TGTCATCAGCTGCCGGAGTAAGCAGGGTTGCCAGTTTGATTTGGATTCCATTTGGACATTCATCTTTGGA  
GTTCTGCCTCCAGCGGAACTGTGGTCTCTTCTATCCATAACGTATGCACAGAAGCTGTTTTTTTATTAT  
TGGAATGCTCCGCAGCATGCTGACTTCACCTTGGCAATCAGAAGAAGAGGGATCTTGGCTCCGAGAATA  
TCCTGTGACCCTGATGCAGTTCTTCAGATATTTGTATCACAACGTGCCAGACCTTGCCTCCATGTGGATG  
AGCCCTGACTTCCTGTGTGCATTAGCAGCCACCGTCTTCCCCTCAATATTCGCCCTTACTCAGAGATGG

TGACTGACCTTGATGATGAAGTTGGATCTCCAGCAGAAGAGTTTAAAGCGTTTGCAGCAGACACAGGGAT  
GAACAGGAGCCAATCAGAGTACTGCAATGTGGGCACCAAGACATATCTGACCAATCACCCGGCTAAAAAG  
TTCGTTTTTGACTTCATGCGGGTCTTAATCATAGACAACCTCTGTCTCACTCCTGCCAGCAAGCAAACCTC  
CACTAATTGATCTTTTGTGGAGGCTTCCCCTGAAAGGTCTACAAGAACTCAGCAAAAAGAATTTCAAAC  
TTACATTTTGGATAGCGTGATGGACCATTGCTTGACGCTGATGTGTTATTAGGGGAAGATGCATCTCTG  
CCTATTACCAGTGGAGGAAGCTACCAGGTATTGGTGAACAATGTGTTTTATTTCACACAGCGTGTGGTGG  
ACAAGCTTTGGCAAGGCATGTTCAACAAAGAATCTAACTTCTTATAGATTTTATAATTCAACTAATTGC  
ACAGTCAAAGAGAAGATCACAGGGATTGTCACTGGATGCAGTGTATCATTGCCTCAATAGGACCATCTTG  
TACCAGTTCTCACGGGCACACAAAACCGTTCCTCAGCAAGTAGCTCTGCTTGATTCACTCAGGGTCTCTCA  
CTGTAAACAGAACTTGATCCTGGGACCTGGGAACCATGACCAAGAATTCATTAGCTGTCTGGCCCACTG  
CTTGATAAATCTACATGTTGGAAGCAACGTGGATGGATTTGGACTGGAAGCAGAAGCCCGCATGACCACA  
TGGCACATTATGATCCCCTCGGACATTGAACCAGATGGTAGTTACAGCCAAGATATTAGTGAAGGGCGTC  
AGCTTCTCATAAAAGCTGTCAACAGAGTTTGGACTGAACTGATACATAGTAAGAAACAAGTCTTAGAGGA  
ACTTTTCAAAGTAACTCTACCTGTGAATGAAAGGGGCCACGTGGACATAGCTACAGCAAGGCCACTCATT  
GAAGAAGCTGCCCTGAAGTGCTGGCAGAATCATTTGGCCCATGAAAAGAAATGCATAAGTCGAGGAGAAG  
CTTTAGCGCCCACCACACAGTCCAAATTATCCCGTGTCAGCAGTGGCTTTGGTCTTTCCAAGTTAACAGG  
ATCAAGAAGGAATCGAAAAGAAAGTGGTCTTAATAAACACAGTCTTTCCACCCAGGAGATTTGCGAGTGG  
ATGTTTACTCACATTGCTGTTGTTTCGTGACTTAGTAGATACACAATATAAAGAATATCAGGAGCGTCAGC  
AGAATGCCCTGAAGTACGTGACAGAAGAGTGGTGTGATCGAGTGCGAGCTGTTGAGGGAGCGGGGGCT  
GTGGGGCCCTCCCATCGGCTCCACCTCGACAAGTGGATGCTGGAGATGACAGAAGGGCCCTGCAGGATG  
AGGAAAAAGATGGTGCGAAATGATATGTTTTATAACCATTACCCTTACGTGCCAGAACTGAGCAAGAGA  
CAAATGTGGCGTCTGAGATCCCAAGTAAACAGCCTGAGACACCCGATGATATTCCTCAAAGAAACCTGC  
TCGATATAGAAGAGCCGTAAGTTATGACAGTAAAGAGTACTACATGCGACTGGCCTCTGGCAATCCCGCC  
ATTGTCCAAGACGCCATTGTGGAGAGTTCAGAAGGTGAAGCTGCTCAGCAAGAACCAGAGCATGGGGAAG  
ACACTATTGCTAAAGTCAAAGGTTTGGTCAAGCCTCCTCTAAAACGCTCCCGATCTGCACCTGATGGAGG

AGATGAGGAGAACCAGGAGCAGCTACAAGACCAGATTGCTGAGGGCAGCTCCATAGAAGAGGAGGAGAAA  
ACAGATAATGCTACCTTACTGCGCCTGTTAGAGGAAGGAGAAAAGATCCAACACATGTACCGCTGTGCTC  
GAGTCCAGGGCCTAGATACCAGTGAGGGGCTCCTTCTTTTTGGTAAAGAGCATTTTTATGTGATTGATGG  
ATTTACCATGACAGCAACCAGGGAAATAAGAGATATTGAAACCTTACCTCCAAATATGCATGAGCCTATT  
ATTCCTAGAGGAGCCAGGCAAGGCCCTAGTCAACTCAAGAGAACATGCAGCATTTTTGCATATGAAGATA  
TCAAGGAAGTTCATAAAAGGAGATATCTCTGCAGCCTATTGCTGTGGAAGTTTTCTCTGGAGATGGACG  
GAATTACCTCCTTGCTTTTCAGAAAGGAATCAGAAACAAAGTCTATCAAAGGTTTTTGGCTGTAGTGCCA  
TCTCTAACGGACAGTTCAGAATCTGTATCTGGGCAACGACCAAACACGAGTGTGGAGCAGGGATCTGGGT  
TACTTAGCACTTTGGTTGGAGAGAAGTCTGTGACTCAGAGATGGGAGAGAGGTGAAATCAGCAACTTCCA  
ATATTTGATGCATTTGAACACTTTGGCTGGCAGATCATATAATGATCTCATGCAGTATCCTGTCTTCCCC  
TGGATCCTTGCAGATTATGACTCAGAGGAGGTGGATCTTACTAATCCCAAGACGTTTAGAAACCTGGCTA  
AGCCAATGGGAGCACAAACAGATGAACGATTAGCTCAGTATAAGAAGCGGTATAAAGACTGGGAGGATCC  
TAATGGAGAACTCCTGCATACCACTATGGGACCCACTATTCATCTGCAATGATTGTGGCCTCATACCTT  
GTAAGGATGGAGCCTTTCACACAGATATTCTTAAGGCTACAGGGTGGCCACTTTGACCTGGCTGACCGGA  
TGTTTCACAGTGTGCGCGAGGCCTGGTATTCAGCGTCAAAGCACAAATATGGCAGATGTAAAAGAACTTAT  
CCCAGAGTTCTTTTATTTACCAGAATTCTGTTC AATTCCAACAACTTTGATCTAGGCTGTAAACAAAAT  
GGCACCAAGCTTGGAGATGTTATCCTTCCACCCTGGGCAAAAGGGGACCCACGAGAATTCATCAGAGTCC  
ATCGTGAGGCTTTGGAGTGTGATTACGTGAGTGCCCATCTACATGAGTGGATTGACTTAATCTTCGGTTA  
TAAACAGCAAGGCCCTGCTGCAGTAGAAGCTGTAAATGTCTTCCATCATCTTTTTTATGAGGGTCAAGTG  
GATATCTACAACATCAATGACCCACTAAAGGAGACAGCCACAATTGGGTTCATTAATAACTTCGGTCAGA  
TCCCTAAACAGTTATTTAAAAAACCTCATCCACCAAAGCGAGTGAGAAGTCGACTCAATGGAGACAATGC  
AGGAATCTCTGTCCTACCAGGATCTACAAGTGACAAGATCTTTTTTCATCATCTAGACAACCTTGAGGCCT  
TCTCTAACACCTGTAAAAGAACTCAAAGAACCTGTAGGACAAATCGTATGTACAGATAAAGGTATTCTTG  
CGGTGGAACAGAATAAGGTTCTTATCCCACCAACCTGGAATAAACTTTTTGCTTGGGGCTATGCAGACCT  
CAGTTGCAGACTGGGAACCTATGAGTCAGACAAGGCCATGACTGTTTATGAATGCTTGTCTGAGTGGGGC

CAGATTCTCTGTGCAATCTGCCCCAACCCCAAGCTGGTCATCACGGGTGGAACAAGCACGGTTGTGTGTG  
TGTGGGAGATGGGCACCTCCAAAGAAAAGGCCAAGACCGTCACCCTCAAACAGGCCTTACTGGGCCACAC  
TGATACCGTCACCTGCGCCACAGCATCATTAGCCTATCACATAATTGTCAGTGGGTCCCGTGATCGAACC  
TGTATCATTTGGGATTTGAACAAACTGTCATTTCTAACCCAGCTTCGAGGGCATCGAGCTCCAGTTTCTG  
CTCTTTGTATCAATGAATTAACAGGGGACATTGTGTCTGCGCTGGCACATATATCCATGTGTGGAGCAT  
CAATGGGAACCCTATCGTGAGTGTCAACACGTTACAGGTAGGAGCCAGCAGATCATCTGCTGCTGCATG  
TCGGAGATGAACGAATGGGACACGCAGAACGTCATAGTGACAGGACACTCAGATGGAGTGGTTCGGTTTT  
GGAGAATGGAATTTTTGCAAGTTCCTGAAACACCAGCTCCTGAGCCTGCTGAAGTCCTAGAAATGCAGGA  
AGACTGTCCAGAAGCACAAATAGGGCAGGAAGCCCAAGACGAGGACAGCAGTGATTGAGAAGCAGATGAG  
CAGAGCATCAGCCAGGACCCTAAGGACACTCCAAGCCAACCCAGCAGCACCAGCCACAGGCCCCGGGCAG  
CCTCCTGCCGCGCAACAGCCGCCTGGTGTACTGACAGTGGCTCTGACGACTCCAGACGCTGGTCCGACCA  
GCTCAGTCTAGATGAGAAAGACGGCTTCATATTTGTGAACTATTCAGAGGGCCAGACCAGAGCCCATCTG  
CAGGGCCCCCTTAGCCACCCCCACCCAATCCCATTGAGGTGCGGAATTACAGCAGATTGAAACCTGGGT  
ACCGATGGGAACGGCAGCTGGTGTTCAGGAGTAAGCTGACTATGCACACAGCCTTTGATCGAAAGGACAA  
TGCACACCCAGCTGAGGTCACTGCCTTGGGCATCTCCAAGGATCACAGTAGGATCCTCGTTGGTGACAGT  
CGAGGCCGAGTTTTAGCTGGTCTGTGAGTGACCAGCCAGGCCGTTCTGCTGCTGATCACTGGGTGAAGG  
ATGAAGGTGGTGACAGCTGCTCAGGCTGCTCGGTGAGGTTTTCACTCACAGAAAGACGACACCATTGCAG  
GAACTGTGGTCAGCTCTTCTGCCAGAAGTGCAGTCGCTTCAATCTGAAATCAAACGCTTGAAAATCTCA  
TCCCCGGTGCGTGTTTGTGAGAACTGTTATTATAACTTACAGCATGAGAGAGGTTGAGAAGATGGGCCTC  
GAAATTGTTGA

>|cl|NM\_007075.4\_cds\_NP\_009006.2\_1 [gene=WDR45] [db\_xref=CCDS:CCDS14318.1] [protein=WD repeat domain phosphoinositide-interacting protein 4 isoform 1] [protein\_id=NP\_009006.2] [location=497..1582] [gbkey=CDS]

ATGACTCAACAGCCACTTCGAGGAGTGACCAGCCTGCGTTTCAACCAAGACCAAAGCTGCTTTTGCTGCG  
CCATGGAGACAGGTGTGCGCATCTACAACGTGGAGCCCTTGATGGAGAAGGGGCATCTGGACCACGAGCA  
GGTGGGCAGCATGGGCTTGGTGGAGATGCTGCACCGCTCCAACCTTCTGGCCTTGGTGGGCGGTGGTAGT  
AGTCCCAAGTTCTCAGAGATCTCAGCAGTGCTGATCTGGGACGATGCCCCGGGAGGGCAAGGACTCCAAGG  
AGAAGCTGGTGCTGGAGTTCACCTTCACCAAGCCAGTGCTTTCTGTGCGCATGCGCCATGACAAGATCGT  
GATCGTGCTGAAGAACCGCATCTATGTGTACTCCTTCCCCGACAATCCCCGAAAGCTGTTTGAGTTTGAT  
ACCCGGGACAACCCCAAGGGGCTCTGTGACCTCTGCCCCAGCCTGGAGAAGCAACTGCTAGTGTTCCCGG  
GACACAAGTGTGGGAGTCTGCAACTTGTGGACCTGGCGAGCACAAAGCCTGGCACCTCGTCTGCTCCATT  
CACGATCAATGCACATCAGAGTGACATAGCCTGTGTGTCTCTAAACCAGCCAGGCACTGTAGTGGCCTCA  
GCCTCCCAGAAGGGTACCCTTATTCGCCTCTTTGACACACAATCCAAGGAGAACTGGTGGAGCTGCGCC  
GAGGCACTGACCCTGCCACCCTCTACTGCATTAACCTCAGCCACGACTCCTCCTTCTCTGCGCTTCCAG  
TGATAAGGGTACTGTCCATATCTTTGCTCTCAAGGATACCCGCCTCAACCGCCGCTCCGCGCTGGCTCGC  
GTGGGCAAGGTGGGGCCTATGATTGGGCAGTACGTGGACTCTCAGTGGAGCCTGGCGAGCTTCACTGTGC  
CTGCTGAGTCAGCTTGCATCTGCGCCTTCGGTCGCAATACTTCCAAGAACGTCAACTCTGTCAATTGCCAT  
CTGCGTAGATGGGACCTTCCACAAATATGTCTTCACTCCTGATGGAACTGCAACAGAGAGGCTTTCGAC  
GTGTACCTTGACATCTGTGATGATGATGACTTTTAA

>|cl|NM\_019613.4\_cds\_NP\_062559.2\_1 [gene=WDR45B] [db\_xref=CCDS:CCDS11815.2] [protein=WD repeat domain phosphoinositide-interacting protein 3] [protein\_id=NP\_062559.2] [location=105..1139] [gbkey=CDS]

ATGAACCTCCTGCCGTGTAACCCTCACGGCAACGGGCTGCTCTACGCCGGCTTCAACCAGGACCACGGAT

GCTTTGCGTGTGGGATGGAAAATGGATTCCGAGTCTATAACACTGATCCACTAAAAGAAAAAGAGAAACA  
AGAATTTCTAGAAGGAGGAGTTGGCCATGTTGAAATGTTATTTGCTGCAACTATTTAGCTTTAGTTGGT  
GGTGGAaaaaAGCCGAAATACCCTCCCAACAAAGTAATGATCTGGGATGACCTGAAGAAGAAGACTGTTA  
TTGAAATAGAATTTTCTACAGAAGTCAAGGCAGTCAAGCTGCGGCGAGATAGAATTGTGGTGGTTTTGGA  
CTCCATGATTAAGGTGTTACATTACACACAATCCCCATCAGTTGCACGTCTTCGAAACCTGCTATAAC  
CCCAAAGGCCTCTGTGTCCTTTGTCCCAATAGTAACAACCTCCCTCCTGGCCTTTCCGGGCACGCACACGG  
GCCATGTGCAGCTTGTGGACCTGGCCAGCACGGAGAAGCCACCCGTGGACATTCTGCACACGAGGGTGT  
CCTGAGCTGCATTGCACTCAACCTGCAGGGAACAAGAATTGCAACTGCATCCGAGAAAGGGACGCTTATA  
AGAATATTTGATACTTCATCAGGGCATTTAATCCAGGAACTGCGAAGAGGATCTCAAGCAGCCAATATTT  
ACTGCATCAACTTCAATCAGGATGCGTCCCTCATCTGCGTATCCAGCGACCACGGCACAGTGCATATTTT  
TGCAGCTGAAGATCCAAAAAGGAATAAACAGTCCAGTTTGGCCTCAGCCAGTTTCCTTCCAAAATACTTC  
AGTTCCAAGTGGAGTTTCTCCAAGTTTCAGGTTCCCTCAGGCTCTCCGTGCATTTGTGCCTTTGGAACAG  
AGCCAAACGCCGTATTGCAATTTGTGCAGACGGCAGCTACTACAAATTCCTGTTCAACCCCAAGGGGGA  
GTGCATCCGAGATGTCTACGCGCAGTTTCTAGAGATGACCGATGACAAGCTGTGA

>|cl|NM\_017983.7\_cds\_NP\_060453.3\_1 [gene=WIP1] [db\_xref=CCDS:CCDS11677.1] [protein=WD  
repeat domain phosphoinositide-interacting protein 1 isoform a] [protein\_id=NP\_060453.3]  
[location=76..1416] [gbkey=CDS]

ATGGAGGCCGAGGCCGCGGACGCTCCCCGGGCGGGGTTGAGTCGGCGCTCAGCTGCTTCTCTTTCAACC  
AGGACTGCACATCCCTAGCAACTGGAATAAGCCGGGTATAAGCTGTTTTCTCTGAGTTCTGTGGAGCA  
GCTGGATCAAGTCCACGGAAGCAATGAAATCCCGGACGTCTACATCGTGGAGCGCCTCTTCTCCAGCAGC  
CTGGTGGTGGTAGTCAGTCACACAAAACACGGCAGATGAACGTGTATCACTTCAAGAAAGGCACAGAGA  
TCTGTAATTACAGCTACTCCAGCAACATCTTGTCATAAGGCTGAACCGGCAAAGGCTGCTGGTTTGCCT

AGAAGAGTCCATTTATATTACAACATTAAAGACATGAAGCTGTTGAAGACCCTCCTGGATATTCTGCA  
AACCCAACAGGTCTATGTGCTCTCTCTATCAACCATTCCAATTCTTACCTGGCCTATCCTGGAAGCCTGA  
CTTCAGGGGAGATTGTGCTTTATGATGGAACTCCCTGAAAACAGTCTGCACTATTGCTGCCCATGAGGG  
AACACTAGCTGCCATCACCTTCAATGCCTCAGGCTCCAACTAGCAAGTGCCTGCTGAAAAAGGCACAGTC  
ATCCGGGTGTTCTCTGTCCCTGATGGGCAAAAGCTCTATGAGTTCGGGAGAGGGATGAAAAGGTATGTGA  
CAATCAGCTCTCTAGTGTTCAGTATGGATTACAATTCTCTGCGCCTCCAGTAACACCGAGACGGTACA  
CATCTTCAAGCTGGAACAGGTCACCAACAGTCGACCAGAAGAGCCTTCGACCTGGAGTGGCTACATGGGA  
AAGATGTTTATGGCTGCTACCAACTACCTCCCTACCCAGGTGTCAGACATGATGCATCAGGACAGGGCTT  
TTGCCACTGCACGCTTGAAGTTCTCCGGACAGAGGAACATCTGTACCCTCTCAACGATCCAGAAGTTGCC  
ACGGCTGCTAGTTGCGTCATCCAGTGGACACCTTTATATGTACAATTTGGATCCTCAGGATGGAGGAGAG  
TGTGTCTTAATCAAAACCCACAGCTTGCTTGGCTCAGGAACAACAGAAGAGAATAAAGAAAATGACCTCA  
GACCTTCCTTACCTCAGTCTTATGCAGCGACCGTAGCCAGACCAAGTGCATCTTCAGCCTCCACGGTGCC  
AGGTTATTCTGAGGACGGCGGGGCGCTGCGAGGAGAAGTTATTCTGAACATGAGTTTGCACGGGACCA  
GTGTGTCTTGATGATGAGAATGAGTTTCCTCTATAATCTTGTGCCGTGGAAATCAGAAGGGCAAAACGA  
AGCAGTCATGA

>|cl|NM\_015610.4\_cds\_NP\_056425.1\_1 [gene=WIP1] [db\_xref=CCDS:CCDS5339.1] [protein=WD repeat  
domain phosphoinositide-interacting protein 2 isoform a] [protein\_id=NP\_056425.1]  
[location=188..1552] [gbkey=CDS]

ATGAACCTGGCGAGCCAGAGCGGGGAGGCCGGCGCCGCCAGCTGCTCTTCGCCAACTTCAACCAGGACA  
ACACAGAAGTGAAAGGGGCATCAAGAGCAGCTGGTCTTGCCGTCGCGCTGTTGTCTGGTCCCTAGCTGT  
TGGTAGTAAGTCCGTTATAAATTTTCTCCCTTCTCTGTGGATAAGCTGGAACAGATCTATGAATGC  
ACCGATACGGAAGATGTGTGCATTGTAGAGAGATTGTTCTCCAGCAGCCTAGTGGCCATCGTCAGCCTTA

AAGCACCAAGGAAGCTAAAGGTTTGCCACTTTAAGAAGGGAAGTGAAGATCTGCAACTACAGCTACTCCAA  
CACGATTCTGGCTGTGAAGCTCAACAGGCAGAGGCTGATAGTATGCCTGGAGGAGTCCCTGTACATCCAC  
AACATTCGGGACATGAAGGTGCTGCATACGATCAGGGAGACGCCTCCAAACCCTGCAGGCCTGTGTGCGC  
TGTCATCAACAACGACAAGTCTACTTGGCGTACCCAGGGAGCGCGACCATCGGAGAGGTGCAGGTCTT  
CGATACCATTAATTTGAGAGCTGCAAACATGATTCCGGCTCACGACAGTCCTTTAGCGGCACTGGCCTTT  
GACGCAAGTGGAAGTAACTTGCCACGGCTTCGGAGAAGGGGACCGTGATTAGGGTATTTTCCATTCCAG  
AAGGACAAAACTCTTTGAGTTTCGGAGAGGAGTAAAGAGGTGCGTGAGCATCTGCTCCCTGGCCTTCAG  
CATGGACGGCATGTTCTCTCCGCCTCCAGCAACACTGAGACCGTGACATCTTCAAACCTCGAGACTGTG  
AAAGAAAAACCCCAGAGGAGCCACACCTGGACCGGGTACTTCGGGAAAGTGCTCATGGCCTCCACCA  
GCTACCTGCCTTCCCAAGTGACAGAAATGTTCAACCAGGGCAGAGCCTTCGCCACGGTCCGCCTGCCATT  
CTGCGGCCACAAAAACATCTGCTCGCTAGCCACAATTCAGAAGATCCCGCGGTTGTTGGTGGGTGCCGCC  
GACGGGTACCTGTACATGTACAACCTGGACCCCAGGAGGGCGGCGAGTGTGCCCTGATGAAGCAGCACC  
GGCTGGACGGCAGTCTGGAAACGACCAATGAGATCTTGGACTCTGCCTCTCACGACTGCCCCTTAGTCAC  
TCAGACATACGGCGCAGCTGCAGGAAAAGTACTTACGTGCCTTCATCCCCAACGAGACTTGCCTACACA  
GACGACCTGGGTGCTGTGGGTGGCGCCTGCCTGGAGGACGAGGCCAGCGCCCTGCGCCTGGATGAGGACA  
GCGAGCACCCGCCCATGATTCTTCGGACTGACTGA

>|cl|NM\_021260.4\_cds\_NP\_067083.1\_1 [gene=ZFYVE1] [db\_xref=CCDS:CCDS9811.1] [protein=zinc  
finger FYVE domain-containing protein 1 isoform 1] [protein\_id=NP\_067083.1] [location=616..2949]  
[gbkey=CDS]

ATGAGTGCCCAGACTTCCCCAGCAGAGAAGGGCCTGAATCCGGGGCTGATGTGCCAGGAAAGTTACGCTT  
GCAGCGGGACTGATGAAGCTATCTTTGAGTGTGATGAGTGCTGCAGTCTGCAGTGTCTCCGCTGCGAGGA  
GGAGCTCCATCGGCAGGAGCGCCTGAGAAACCATGAGCGGATAAGACTCAAACCTGGCCATGTCCCTTAC

TGTGACCTCTGCAAGGGTCTCAGTGGGCATTTACCAGGTGTTAGGCAGAGGGCAATAGTGAGGTGCCAGA  
CCTGCAAAATTAACCTTGTGCCTGGAGTGCCAGAAGAGGACTCATTCTGGGGGTAACAAAAGGAGACACCC  
TGTTACTGTGTACAATGTCAGTAATCTCCAGGAGTCACTGGAGGCAGAAGAGATGGATGAGGAGACCAAG  
AGGAAGAAGATGACTGAGAAGGTTGTGAGTTTCCTCCTAGTAGACGAAAATGAAGAAATTCAGGTAACAA  
ATGAAGAAGACTTTATTAGAAAATTGGACTGCAAACCTGATCAGCATCTGAAAGTGGTTTCCATTTTTGG  
AAATACTGGTGATGGAAAGTCTCATACTCTCAACCACACTTTCTTTTATGGTCGTGAAGTCTTTAAAACC  
TCCCCGACCCAGGAGTCCTGCACTGTGGGAGTGTGGGCAGCCTATGACCCAGTTCACAAAGTAGCAGTGA  
TCGATACGGAAGGGCTCCTGGGGGCCACCGTGAATCTAAGCCAGAGAACACGGCTGCTGCTTAAGGTCTT  
GGCCATCTCAGACCTCGTCATCTATCGAACTCATGCAGACCGGCTGCATAACGACCTCTTCAAATTCCTT  
GGGGATGCCTCAGAAGCTTATCTGAAGCACTTCACCAAGGAGCTCAAGGCCACCACTGCTCGCTGTGGCC  
TGGATGTCCCTTTATCCCACTGGGCCCTGCAGTTATCATCTTCCATGAGACCGTGCACACCCAGCTACT  
GGGCTCTGATCATCCCTCAGAGGTGCCAGAGAAGCTCATCCAGGACCGGTTCCGGAAGCTGGGCCGTTTC  
CCTGAAGCCTTTAGTTCCATTCACTACAAGGGAACGAGGACTTACAACCCTCCCACGGACTTTTCTGGGC  
TTCGGCGTGCTTTGGAGCAGCTACTAGAGAATAACACCACCCGTTCTCCCCGGCACCCGGGAGTCATCTT  
CAAAGCCCTGAAGGCACTAAGTGACCGCTTCAGCGGTGAGATCCCCGATGACCAGATGGCGCACAGCTCC  
TTTTTCCAGATGAGTATTTACCTGCTCCTCCTTGTGCCTCAGCTGTGGGGTTGGATGTAAGAAAAGCA  
TGAATCATGGGAAGGAAGGAGTGCCTCATGAAGCCAAGAGCCGCTGCAGATACTCCCACCAGTATGACAA  
CCGAGTGTATACCTGCAAGGCCTGCTATGAGAGAGGCGAGGAAGTCAGTGTAGTGCCCAAAACATCTGCT  
TCCACTGACTCCCCCTGGATGGGTCTCGCAAAATATGCCTGGTCTGGGTATGTGATCGAATGTCCTAACT  
GTGGCGTGGTCTATCGTAGTCGGCAGTACTGGTTTGGAACCAAGATCCTGTGGATACGGTGGTGCGGAC  
AGAGATTGTGCATGTGTGGCCTGGAAGTATGAGGTTTCTGAAGGACAACAACAATGCTGCCCAGCGCCTG  
TTGGACGGGATGAACTTCATGGCTCAGTCGGTGTCCGAGCTTAGCCTTGACCCACCAAGGCTGTGACTT  
CCTGGCTGACAGACCAGATCGCCCCTGCCTACTGGAGGCCCAACTCCCAGATTCTGAGCTGCAACAAGTG  
TGCGACGTCTTTAAAGATAACGACACTAAGCATCACTGCCGAGCCTGTGGGGAGGGCTTCTGTGACAGC  
TGTTTCATCAAAGACTCGGCCAGTGCCTGAGCGGGGCTGGGGCCCTGCGCCAGTGCGGGTCTGTGACAACT

GCTACGAAGCCAGGAACGTCCAGTTAGCTGTTACCGAGGCACAAGTGGACGATGAAGGTGGAACGCTCAT  
TGCTCGGAAGGTGGGCGAGGCCGTGCAGAACTCTGGGAGCCGTGGTGACAGCCATTGACATACCACTA  
GGTCTGGTAAAGGACGCGGCCAGGCCTGCGTACTGGGTGCCTGACCACGAAATCCTCCACTGCCACAAC  
GCCGGAAGGAGTTCAGCATCAAGCTCTCAAGCACCACTGCCGGGCCTGCGGACAGGGCTTCTGTGATGA  
GTGCTCCCATGACCGCCGGGCTGTTCTTCTCGTGGCTGGGACCATCCCGTCCGAGTCTGCTTCAACTGC  
AATAAAAAGCCCGGTGACCTTTAA
