# Supplementary material for: Analysis of the Compositional Features and Codon Usage Pattern of Genes Involved in Human Autophagy
Source: Cells. 2022 Oct 12;11(20):3203. doi: 10.3390/cells11203203 (PMC9601114; doi:10.3390/cells11203203)
Supplement: Supplementary file 1 [file cells-11-03203-s001.zip › Supplementary Table S3.pdf]

**Supplementary Table S3.** Complete mRNA sequences of 224 human autophagy genes.

>NM\_017749.3 Homo sapiens autophagy and beclin 1 regulator 1 (AMBRA1), transcript variant 2, mRNA  
AGGGGATTAATGAAGAGCCACCAGACTATCTTTATGGAGAATCTAGATTGGGAAGTTAAGCTAAGAATGT  
GCATTTTTGAAAAAGTTTTATGGTAGAAGAGAATGTATATCAGAGGAAAGAATGTAGAGAAGAAAGCAA  
CATTGTCCACTGGGAATTGATAAGTTCTGCGTAGAATTTAGAGTTATAAGGACTATCTCATTGGCTCCTA  
ATGAATGCTAAATAACAAATGGAAATTGCTATTTCCATGAGGACAACCTACAAGGACCTGTATGGCCTCA  
TTTAGCTGCTTCAGTGTGTTGGAGCTGTTACTTGCTCCTTCATTTCTGGGCCTGGTGTGACAGTGGCT  
ACTGAGCGCCATGAAGGTTGTCCAGAAAAGAATGCTGTCCGGATACTCTGGGGGCGAGAACGGGGTGCT  
CGGGCCATGGGAGCTCAGCGGCTTCTGCAGGAGCTGGTAGAAGATAAAACCCGGTGGATGAAATGGGAGG  
GCAAGAGAGTAGAACTGCCGGATAGTCCACGCTCTACCTTCTTATTGGCCTTCAGCCCAGACAGGACTCT  
CTTAGCCTCCACCCATGTGAACCATAATATCTATATTACGGAGGTGAAGACTGGCAAGTGTGTTCAATCC  
CTGATTGGACACCGCCGTACTCCATGGTGTGTCACCTTTTCATCCCACCATCTCAGGCCTTATTGCTTCTG  
GCTGCCTAGATGGGGAGGTTAGGATTTGGGATTTACACGGTGGCAGTGAAAGCTGGTTCACAGATAGCAA  
CAATGCCATTGCCTCCCTGGCTTTCCACCCTACGGCTCAGCTCCTGCTGATTGCCACTGCCAATGAGATC  
CACTTCTGGGACTGGAGTCGACGGGAACCCCTTTGCTGTGGTGAAGACAGCTAGTGAGATGGAACGGGTCC  
GTCTGGTGAGATTTGATCCACTTGACACTACTTACTCACAGCAATTGTTAACCCCTCTAATCAACAGGG  
TGATGACGAACCAGAGATCCCCATAGATGGAACAGAATTATCCCACTACCGTCAGCGTGCCCTCCTGCAA  
TCACAGCCAGTTCGCCGGACGCCTCTCCTCCACAATTTCTGCACATGCTGTCCTCCCGCTCTTCTGGCA  
TCCAGACCGAGCCCTTCCATCCCCCGGAGCAGGCCTCGTCAACGCAGCAGGACCAGGGCCTCCTGAACCG  
GCCGTCTGCCTTCAGTACAGTCCAGAGCAGCACTGCCGGCAACACGCTCCGCAACCTCAGTCTGGGTCCT  
ACCCGCCGCTCTTTGGGAGGGCCTCTGTCTAGCCACCCTTCTAGGTATCACCGAGAAATAGCTCCTGGGT  
TGACAGGATCTGAGTGGACCCGGACAGTACTCAGTCTGAACTCCCGCTCTGAGGCGGAATCCATGCCCCC  
GCCCAGAACCAGTGCCTCTTCGGTGAGTTTGCTGTCTGTGCTGAGACAGCAGGAAGGTGGCTCTCAGGCA  
TCTGTGTACACTTCAGCCACAGAAGGGAGGGGTTTTCCGGCATCAGGGTTGGCAACTGAGTCAGATGGAG

GGAATGGCTCCAGCCAAAACAACCTCGGGCAGCATTCGCCATGAGCTTCAGTGTGACCTGAGACGCTTCTT  
TCTGGAGTATGACCGGCTTCAGGAGCTGGATCAGAGCCTGAGTGGGGAAGCTCCCCAGACCCAACAGGCC  
CAGGAAATGCTCAACAATAACATTGAATCTGAGAGGCCAGGCCCTTCCCACCAGCCCACCCCACACAGCA  
GTGAGAACAACCTCAACCTGTCCCGTGGCCACCTGAATCGCTGTCGTGCTTGCCACAATCTCCTGACCTT  
CAACAACGATACCCTGCGCTGGGAAAGAACCACACCTAACTACTCCTCTGGCGAGGCTAGTTCCTCTTGG  
CAGGTCCCCAGCTCCTTTGAGAGTGTGCCATCAAGTGGCAGCCAGTTGCCACCTCTCGAGCGGACTGAGG  
GCCAAACGCCCAGCTCCAGCAGGCTGGAGTTGAGCAGCTCTGCTAGTCCGCAGGAGGAGAGGACTGTGGG  
GGTGGCCTTTAACCAGGAGACAGGCCACTGGGAAAGAATTTACACCCAGTCCAGCAGATCTGGAACCTGTG  
TCACAGGAGGCCTTACATCAGGATATGCCTGAGGAGAGCTCTGAGGAGGATTCACTCAGGAGGAGGCTGC  
TGGAATCTTCCCTCATTTTATTATCCCGTTATGATGGAGCAGGATCCAGAGAGCACCCAATTTACCCAGA  
CCCAGCGAGATTATCTCCTGCTGCATACTACGCCCAGAGGATGATCCAGTATCTCTCACGGAGAGACAGT  
ATTCGCCAGCGCTCCATGCGCTACCAACAGAACCGTCTCCGTTCTTCCACCTCCTCCTCTTCCTCAGACA  
ACCAGGGTCCATCAGTAGAGGGAACCGACTTGGAATTTGAGGACTTTGAGGACAATGGTGACAGATCCAG  
GCACCGAGCTCCACGCAATGCCCGGATGTCTGCACCTTCGCTTGACGCTTTGTCCCAAGGCGTTTCTTG  
CTGCCTGAGTACTTGCCTTATGCTGGGATTTTTTATGAACGTGGACAGCCTGGCTTGGCTACTCACTCTT  
CTGTTAACAGGGTCTGGCAGGGGCAGTGATCGGTGATGGACAGTCTGCTGTGGCCAGTAACATTGCCAA  
TACTACCTACCGGCTCCAGTGGTGGGACTTCACTAAGTTTGACCTCCCTGAAATCAGTAATGCTTCCGTG  
AATGTGCTGGTGCAGAACTGCAAGATCTACAATGATGCCAGCTGTGACATTTCTGCAGATGGCCAGCTCC  
TGGCAGCTTTTCATCCCCAGCAGCCAGAGGGGCTTTTCTGATGAAGGCATCCTGGCAGTGTACTCCCTGGC  
CCCCATAACCTGGGCGAAATGCTCTACACCAAGCGATTTGGTCCCAATGCCATTTGGTGAGCCTGTCC  
CCAATGGGCAGATATGTAATGGTGGGCTTGGCCTCACGAAGGATCCTGCTGCACCCCTCCACAGAGCACA  
TGGTGGCCCAGGTCTTCAGGCTGCAACAGGCCCATGGTGGAGAGACCTCCATGAGGAGAGTTTTCAACGT  
CCTTTATCCCATGCCTGCCGACCAGCGGAGACATGTCAGTATCAACTCTGCCCCTTGGCTGCCTGAGCCA  
GGGCTTGGCTTGGCCTATGGTACTAACAAGGAGACCTGGTGATCTGCCGACCAGAGGCCTTAAACTCTG  
GTGTTGAGTACTACTGGGACCAGCTGAACGAGACGGTCTTCACTGTCCATTCCAACAGCAGGAGCAGCGA

GCGGCCTGGAACCAGCAGAGCCACATGGAGGACAGACAGAGACATGGGGCTGATGAATGCCATTGGGCTT  
CAGCCCCGGAACCCTGCCACCTCAGTGACATCTCAGGGCACCCAGACTCTGGCCCTCAGCTGCAGAATG  
CCGAAACACAGACTGAGAGGGAGGTGCCGGAGCCAGGGACAGCCGCCTCAGGTCCTGGTGAAGGTGAGGG  
TTCAGAGTATGGTGCCAGTGGAGAAGATGCGCTCAGCAGGATCCAGAGGCTGATGGCGGAGGGCGGCATG  
ACAGCCGTGGTGACGCGGGAGCAGAGCACCACCATGGCCTCCATGGGCGGCTTCGGCAACAACATCATCG  
TCAGCCACCGCATTACCCGCAGCTCTCAGACGGGCACTGAACCTGGTGCCGCCACACCTCCTCACCCCA  
GCCCTCCACCTCTCGGGGACTGCTCCCAGAGGCCGGGCAACTGGCAGAGCGAGGCCTAAGCCCCGGACA  
GCTTCCTGGGACCAGCCTGGTACCCCTGGGCGGGAGCCAACCCAGCCAACCCTGCCCTCTTCTCCCCTG  
TCCCCATTCTGTTTCCCTTCCCAGCGCTGAGGGACCAACCCTCCACTGCGAGTTGACCAATAACAACCA  
CCTTCTGGATGGTGGCAGCAGCAGGGGGGACGCTGCAGGCCCTAGGGGAGAACCACGGAACAGGTAGAGA  
CAAACGTTGCACTGGTGCCTCCCCTCGAACCGCCAAGCAGAAACCGGACCTCACAGCTGACTGGGAACTG  
GACATGTGGAAGAGCTGCTGGCTGCATCAGGGAACAGGAGGAGGAAGAGGGTCAGGGTGGAGAGGAAGAT  
CAGTCAGTGGGCACAAGACAGTCAAATGGGCAAGGCCTGCCTCGGGGAACTAGAACCTTCCAGGATCTGG  
AGCCCCGGGAGAGCCACACTGTGGGCTTAATGTGAATAGAGGAACAAGTGGGTATCTCTGCCAGGCACCCC  
ACTTTCTCTAGTAACATGGGCTCAGGGGACTCAGCCCTGGACAGAGAGCCTCCAGAGAGTGAACAGTCT  
TCCAGATCTGGGCCAATCATCTGGACAGAGGCCCGCGAGGCAGCTTTGCCCTGTCCACCTGTTGGGTGG  
GCAGAGCCACCAGGAACCCAGACACCACCTCCAACCTCTGAGCCTTCCAGAGCTTCAGCCTCTCTTCGTCG  
TCTTACCCCACTGAAACCAACAGGGATCGGGCCAGGCTCCAGATTCTTGAGGACAGGGACTTCGGCATT  
TACTAATGGGGGACTACTGTGGGGTAAGGGGGCGCCTGCTTGCCTGATACAGGATGGGGTCAAGGGACAG  
TGGGCAGGTCCTCACTCAGGAGTGGGGGGTGTAGGCTGGCCAGCCCCAGGGCTTGTCCACCAGTCTTCT  
CCCCGCAAGGCCCTCAGAGCAGCGCCTGTGGGTGTAGTATTACCTGAGCCTAGGCCAAAGCTAGCCCAA  
GGCTGGGGAAGGGGAGGAGACTCCAGGTCAGAATGTGAGGTCTCAGTCTGTGATTTAAGGTGTTGCATGT  
GGACTCTTAACTGTACGTGTAGTTTCTAGTGGAGAAATCAAGGCTCTGATCATTTTGTTTTGTAGTATGAA  
AATGTGATTTCTTTCTGTTTGTAACTCATCATAGAAACATTGTGGTGGGAGGAGAGGGGATAGTCTACA  
GCTAATGAGGGAAACACCAAAGATCACATCATTAATGATGACATGCCCTCGCAAAAAAAAAA

>NM\_145343.3 Homo sapiens apolipoprotein L1 (APOL1), transcript variant 2, mRNA

ATTATACAGACGCATAACTGGAGGTGGGATCCACACAGCTCAGAACAGCTGGATCTTGCTCAGTCTCTGC  
CAGGGGAAGATTCTTGACTTCTGGGGTGATGGAGAAGAAACAGGCTGTGCTGTGTCCCTAATGGGAAAC  
GTGGCTGAGACAGGGGAGTGAGAAGGGTGC GTTGAGAATGGTGCCTGTGGCATGATGCCAGCTTTGCAA  
TCATGAGATTCAAAAGCCACACTGTGGAATTGAGGAGGCCCTGCAGCGACATGGAGGGAGCTGCTTTGCT  
GAGAGTCTCTGTCCTCTGCATCTGGATGAGTGCAC TTTCTTG GTGTGGGAGTGAGGGCAGAGGAAGCT  
GGAGCGAGGGTGCAACAAAACGTTCCAAGTGGGACAGATACTGGAGATCCTCAAAGTAAGCCCCTCGGTG  
ACTGGGCTGCTGGCACCATGGACCCAGAGAGCAGTATCTTTATTGAGGATGCCATTAAGTATTTCAAGGA  
AAAAGTGAGCACACAGAATCTGCTACTCCTGCTGACTGATAATGAGGCCTGGAACGGATTCGTGGCTGCT  
GCTGAACTGCCCAGGAATGAGGCAGATGAGCTCCGTAAAGCTCTGGACAACCTTGCAAGACAAATGATCA  
TGAAAGACAAAACTGGCACGATAAAGGCCAGCAGTACAGAACTGGTTTCTGAAAGAGTTTCCTCGGTT  
GAAAAGTGAGCTTGAGGATAACATAAGAAGGCTCCGTGCCCTTGCAAGATGGGGTTCAGAAGGTCCACAAA  
GGCACCACCATCGCCAATGTGGTGTCTGGCTCTCTCAGCATTTCTCTGGCATCCTGACCCTCGTCGGCA  
TGGGTCTGGCACCTTCACAGAGGGAGGCAGCCTTG TACTCTTGGAACCTGGGATGGAGTTGGGAATCAC  
AGCCGCTTTGACCGGGATTACCAGCAGTACCATGGACTACGGAAGAAAGTGGTGGACACAAGCCCAAGCC  
CACGACCTGGTCATCAAAAGCCTTGACAAATTGAAGGAGGTGAGGGAGTTTTTGGGTGAGAACATATCCA  
ACTTTCTTTCTTAGCTGGCAATACTTACCAACTCACACGAGGCATTGGGAAGGACATCCGTGCCCTCAG  
ACGAGCCAGAGCCAATCTTCAGTCAGTACCGCATGCCTCAGCCTCACGCCCCGGGTCACTGAGCCAATC  
TCAGCTGAAAGCGGTGAACAGGTGGAGAGGGTTAATGAACCCAGCATCCTGGAAATGAGCAGAGGAGTCA  
AGCTCACGGATGTGGCCCCTGTAAGCTTCTTTCTTGTGCTGGATGTAGTCTACCTCGTGACGAATCAAA  
GCACTTACATGAGGGGGCAAAGTCAGAGACAGCTGAGGAGCTGAAGAAGGTGGCTCAGGAGCTGGAGGAG

AAGCTAAACATTCTCAACAATAATTATAAGATTCTGCAGGCGGACCAAGAACTGTGACCACAGGGCAGGG  
CAGCCACCAGGAGAGATATGCCTGGCAGGGGCCAGGACAAAATGCAAACCTTTTTTTTTTTCTGAGACAG  
AGTCTTGCTCTGTGCGCAAGTTGGAGTGCAATGGTGCGATCTCAGCTCACTGCAAGCTCTGCCTCCCGTG  
TTCAAGCGATTCTCCTGCCTTGGCCTCCCAAGTAGCTGGGACTACAGGCGCCTACCACCATGCCCAGCTA  
ATTTTTGTATTTTAATAGAGATGGGGTTTCACCATGTTGGCCAGGATGGTCTCGATCTCCTGACCTCTT  
GATCTGCCCACCTTGGCCTCCCAAAGTGCTGGGATTACAGGCGTGAGCCATCGCTTTTGACCCAAATGCA  
AACATTTTATTAGGGGGATAAAGAGGGTGAGGTAAAGTTTATGGAAGTGAAGTGTAGGGACTTTGGCATT  
TCCATAGCTGAGCACAGCAGGGGAGGGGTAAATGCAGATGGCAGTGCAGCAAGGAGAAGGCAGGAACATT  
GGAGCCTGCAATAAGGGAAAAATGGGAAGTGGAGAGTGTGGGGAATGGGAAGAAGCAGTTTACTTTAGAC  
TAAAGAATATATTGGGGGGCCGGGTGTAGTGGCTCATGCCTGTAATCCGAGCACTTTGGGAGGCCAAGGC  
GGGCGGATCACGAGGTCAGGAGATCGAGACCATCCTGGCTAACACAGTGAAACCCCGTCTCTACTAAAAA  
TACAAAAAATTAGCCGGGCATGGTGGCGGGCGCCTGTAGTTCAGCTAACTGGGCGGCTGAGGCAGGAGA  
ATGGCGTGAACCTGGGAGGTGGAGCTTGCACTGAGCCGAGATATCGCCACTGCACTCCAGCCTGGGTGAC  
AGAGCGAGACTCCATCTCAAAAAAAAAAAAAAAAAAGAATATATTGACGGAAGAATAGAGAGGAGGCTTGA  
AGGAACCAGCAATGAGAAGGCCAGGAAAAGAAAGAGCTGAAAATGGAGAAAAGCCCAAGAGTTAGAACAGT  
TGGATACAGGAGAAGAAACAGCGGCTCCACTACAGACCCAGCCCCAGGTTCAATGTCCTCCGAAGAATGA  
AGTCTTTCCTGGTGATGGTCCCCTGCCCTGTCTTCCAGCATCCACTCTCCCTTGTCTCTCTGGGGGCA  
TATCTCAGTCAGGCAGCGGCTTCCTGATGATGGTCATTGGGGTGGTTGTCATGTGATGGGTCCCCTCCAG  
GTTACTAAAGGGTGCATGTCCCCTGCTTGAACACTGAAGGGCAGGTGGTGGGCCATGGCCATGGTCCCCA  
GCTGAGGAGCAGGTGTCCCTGAGAACCCAACTTCCCAGAGAGTATGTGAGAACCAACCAATGAAAACAG  
TCCCATCGCTCTTACCCGGTAAGTAAACAGTCAGAAAATTAGCATGAAAGCAGTTTAGCATTGGGAGGAA  
GCTCAGATCTCTAGAGCTGTCTTGTGCGCCGCCAGGATTGACCTGTGTGTAAGTCCCAATAAACTCACCT  
ACTCATCAA

>NM\_001197325.2 Homo sapiens aryl hydrocarbon receptor nuclear translocator (ARNT), transcript variant 4, mRNA

GGGGTGGCGCGGCGGCGGTGGCATCTGCGGCCATGGCGGCGACTACTGCCAACCCCGAAATGACATCAGA  
TGTACCATCACTGGGTCCAGCCATTGCCTCTGGAACTCTGGACCTGGAATTCAAGGTGGAGGAGCCATT  
GTCCAGAGGGCTATTAAGCGGCGACCAGGGCTGGATTTTGATGATGATGGAGAAGGGAACAGTAAATTTT  
TGAGGTGTGATGATGATCAGATGTCTAACGATAAGGAGCGGTTTGCCAGGGAAAATCACAGTGAAATTGA  
ACGGCGGCGACGGAACAAGATGACAGCCTACATCACAGAACTGTCAGATATGGTACCCACCTGTAGTGCC  
CTGGCTCGAAAACCAGACAAGCTAACCATCTTACGCATGGCAGTTTCTCACATGAAGTCCTTGCGGGGAA  
CTGGCAACACATCCACTGATGGCTCCTATAAGCCGCTTTCTCTACTGATCAGGAACTGAAACATTTGAT  
CTTGAGGCAGCAGATGGCTTTCTGTTTATTGTCTCATGTGAGACAGGCAGGGTGGTGTATGTGTCTGAC  
TCCGTGACTCCTGTTTTGAACCAGCCACAGTCTGAATGGTTTGGCAGCACACTCTATGATCAGGTGCACC  
CAGATGATGTGGATAAACTTCGTGAGCAGCTTTCCACTTCAGAAAATGCCCTGACAGGGCGTATCCTGGA  
TCTAAAGACTGGAACAGTGAAAAAGGAAGGTCAGCAGTCTTCATGAGAATGTGTATGGGCTCAAGGAGA  
TCGTTTATTTGCCGAATGAGGTGTGGCAGTAGCTCTGTGGACCCAGTTTCTGTGAATAGGCTGAGCTTTG  
TGAGGAACAGATGCAGGAATGGACTTGGCTCTGTAAAGGATGGGGAACCTCACTTCGTGGTGGTCCACTG  
CACAGGCTACATCAAGGCCTGGCCCCAGCAGGTGTTTCCCTCCCAGATGATGACCCAGAGGCTGGCCAG  
GGAAGCAAGTTTTGCCTAGTGGCCATTGGCAGATTGCAGGTAAGTCTCCCAACTGTACAGACATGA  
GTAATGTTTGTCAACCAACAGAGTTCATCTCCCGACACAACATTGAGGGTATCTTCACTTTTGTGGATCA  
CCGCTGTGTGGCTACTGTTGGCTACCAGCCACAGGAACTCTTAGGAAAGAATATTGTAGAATTCTGTCAT  
CCTGAAGACCAGCAGCTTCTAAGAGACAGCTTCCAACAGGTAGTGAAATTAAGGCCAAGTGCTGTCTG  
TCATGTTCCGGTTCGGTCTAAGAACCAAGAATGGCTCTGGATGAGAACCAGCTCCTTTACTTTCCAGAA  
CCCTTACTCAGATGAAATTGAGTACATCATCTGTACCAACACCAATGTGAAGAACTCTAGCCAAGAACCA  
CGGCCTACACTCTCCAACACAATCCAGAGGCCACAAGTGGTCCCACAGCTAATTTACCCCTGGAGATGG  
GCTCAGGACAGCTGGCACCCAGGCAGCAGCAACAGCAAACAGAATTGGACATGGTACCAGGAAGAGATGG  
ACTGGCCAGCTACAATCATTCCCAGGTGGTTCAGCCTGTGACAACCACAGGACCAGAACACAGCAAGCCC

CTTGAGAAGTCAGATGGTTTATTTGCCCAGGATAGAGATCCAAGATTTTCAGAAATCTATCACAACATCA  
ATGCGGATCAGAGTAAAGGCATCTCCTCCAGCACTGTCCCTGCCACCCAACAGCTATTCTCCCAGGGCAA  
CACATTCCCTCCTACCCCCGGCCGGCAGAGAATTCAGGAATAGTGGCCTAGCCCCCTCTGTAACCATT  
GTCCAGCCATCAGCTTCTGCAGGACAGATGTTGGCCAGATTTCCCGCCACTCCAACCCACCCAAGGAG  
CAACCCCAACTTGGACCCCTACTACCCGCTCAGGCTTTTCTGCCCAGGTGGCTACCCAGGCTACTGCTAA  
GACTCGTACTTCCCAGTTTGGTGTGGGCAGCTTTCAGACTCCATCCTCCTTCAGCTCCATGTCCCTCCCT  
GGTGCCCCAACTGCATCGCCTGGTGTGCTGCCTACCCTAGTCTCACCAATCGTGGATCTAACTTTGCTC  
CTGAGACTGGACAGACTGCAGGACAATTCCAGACACGGACAGCAGAGGGTGTGGGTGTCTGGCCACAGTG  
GCAGGGCCAGCAGCCTCATCATCGTTCAAGTTCTAGTGAGCAACATGTTCAACAACCGCCAGCACAGCAA  
CCTGGCCAGCCTGAGGTCTTCCAGGAGATGCTGTCCATGCTGGGAGATCAGAGCAACAGCTACAACAATG  
AAGAATTCCCTGATCTAACTATGTTTCCCCCTTTTCAGAATAGAACTATTGGGGTGAGGATAAGGGGTG  
GGGGAGAAAAAATCACTGTTTGTTTTAAAAAGCAAATCTTCTGTAAACAGAATAAAAGTTCCTCTCCC  
TTCCCTTCCCTCACCCCTGACATGTACCCCTTTCCCTTCTGGCTGTCCCTGCTCTGTTGCCTCTCTA  
AGGTAACATTTATAGAAGAAATGGAATGAATCTCCAAGGCTTTTAGGACTGTCTGAAAATTTGAGGCTGG  
GTGAAGTTAAACACCTTTCCTTATGTCTCCTGACCTGAAATTGTATAGTGTTGATTTGTGCTGAGATCA  
AGAGGCAGGTTAGAAGAACCTGACATCCACTGTTTGCCTTGGATAGTATGGCTTGTTTTTGGAAGAAAT  
TCTGAAGAGAGTGGAGGAGAGGAGAAATGTCCTCATATTTGAGGACCATGAAACATTGTAGGTATATATG  
GGGCTTTAGCAAGTTTGAGCATAGGCTCTTTTTGCTGCCTGTGAGCAGTCCCTCTGGAAAGAAACATGTG  
AGTAAGTGAGAGAGAGTGTGTGTGTATGTGTGTGTGTGTGTGTGTGCGCACACATGCTTCTGTATTTAC  
TCTTCTCCCTATTAGGGAGTTATGCAAAATTTGTCCCGATTTACCTTTGTCTTCTGTGTACTTTTC  
AAAGAGTCCTAAGGAGTTAAATCTTCAGGTATTTTCCACTTAGTATTGCAGCCAAAGAATATTTAAATA  
AACGTCTTTGCTGCGCTTGCATCCATGCCCAGCCAATATACAACCTGTAAAGCAAATATAGAAAGTCGGCT  
GTTGATACGATTGTCTGTTATCGAACACATTCAGTGATAAAGCTGGGTTACTGCTGCTTTTGGTGCTCTC  
ACCTTATCTGGAAGATCTGCAAACATTACCTAAATAGGCTGGCAAGATAAACACTTTCTGGAACCCGAGA  
CTTGCCATAAAGATAATGCTGCATTTTTCTGTGAGAATCACATATGATGTGTGTTCTGTAGAGGTTATT

TCTGCATGGAACTCAACTTCTTGGATTAGCCGTCCCAGTGAAAAATCCTCATTGTTGGAGTGTAACCAA  
ATACGAAGCCCTCTTGCAAAGTAGCCTCTTTCATCCCATACTCAAAATACCCAGTTTAGCAAGCAACTGA  
GATTTAAGTCTCTCTGGCCCTAAGAGGTTTTCTCTTGTCCCTCCAATCTTGAGATTGGGTTTTGCT  
TTAGAGTGCAAGTATCATAATCCGTATGATAGATGGGGCCTGGACACCCATCTCAACAGGGTCACTTGG  
TAATTAACAATAGCCATATAAATGCGGATACAGGTTACTACCCTCACCTTTACCTTCCTCAGGTAACAG  
TCGTAGATACCAGCTTTTTTTTTTTTTTTTTAAATTGGCTTTGGCCAGTAGCTAAAGTGCAAGACTGAA  
TTAATGAGAAGATATATTAATGTAGTCATAGGGGACTGAGGAGCAAGGGTGGCCTTGAAGAGGCCAAAG  
GAATGTCCATTTGCTGAGTTTCCCTTCCTTATGTCTCCAGTCTGGTGCCAGGTAGTGGAGTAAAAAAGGA  
GACAGTTTATTTTTTTATTCTATGTGCACACTTACAGTATACATATATTTATATCACAATTTACGAAA  
CCAAAAAGTTGAGTTTCCAATGGAACCCTTGTTTTTAATAATCGACTTTTTAAATGTGATCAGGACTAT  
AATATTGTACAGTTATTATAGGGCTTTTGGGGAAGGGGAGGATAGCGAGAAGATGCTCTGGGGGTTTTGT  
TTTTGCTTTTCCTCAGGGTTTTATTTTTGACTGTTTTGTTTTCTTGTTGGCCATTTCTGTATTGCTGGC  
ATCTGTGCTAAGCTTTACAGTGGCAAAAATAATGACATGTAGCAAAGATTTTCAAACAAAATATTTTTTC  
CTTTTGTAATAATTTCTTGTTGTGTGATCTTGATTGCGGCTTTATCATTCTTTCCAGTTCATAAACAA  
CAGGCACCCACAACCAGAGGAATCTATAGTTTAAGCTCCAGACATACAAACATAAGGCACATTGTGTCTT  
TAATTCAGGAATCAGAAATCATAGGGTTCTGATCATTGCACGCCTCCCCCTCACTTGTCTCTCTGA  
TCCTGACACATTCTGAGTAACATCAGCAGGAATGCTCTGACCATGAGGTGGGGGTTTTGGGGTGGGCGTT  
GCCTGGGTCTTGGGAGAGAGGGGAAGAGTCGGGACTTGAAAACCACTAGGGGCACATCTGGATGCCTTCC  
CCCAGTATGTCCTTTTCTGGATTAAATGAGTGAAATTTAAA

>NM\_000487.6 Homo sapiens arylsulfatase A (ARSA), transcript variant 1, mRNA

GAGGCGGAAGCGCCCGCAGCCCGGTACCGGCTCCTCCTGGGCTCCCTCTAGCGCCTTCCCCCGGCCCGA  
CTCCGCTGGTCAGCGCCAAGTGA CTACGCCCCGACCCTGAGCCCGGACCGCTAGGCGAGGAGGATCAG

ATCTCCGCTCGAGAATCTGAAGGTGCCCTGGTCTGGAGGAGTTCCGTCCCAGCCCCGGTCTCCCGGTA  
CTGTCGGGCCCCGGCCCTCTGGAGCTTCAGGAGGCGGCCGTAGGGTCGGGGAGTATTTGGGTCCGGGGT  
CTCAGGGAAGGGCGGCGCCTGGGTCTGCGGTATCGGAAAGAGCCTGCTGGAGCCAAGTAGCCCTCCCTCT  
CTTGGGACAGACCCCTCGGTCCCATGTCCATGGGGGCACCGCGGTCCCTCCTCCTGGCCCTGGCTGCTGG  
CCTGGCCGTTGCCCCGTCCGCCAACATCGTGCTGATCTTTGCCGACGACCTCGGCTATGGGGACCTGGGC  
TGCTATGGGCACCCAGCTCTACCACTCCCAACCTGGACCAGCTGGCGGCGGGAGGGGCTGCGGTTACAG  
ACTTCTACGTGCCTGTGTCTCTGTGCACACCCTCTAGGGCCGCCCTCCTGACCGGCCGGCTCCCGGTTG  
GATGGGCATGTACCCTGGCGTCCTGGTGCCAGCTCCCGGGGGGGCCTGCCCTGGAGGAGGTGACCGTG  
GCCGAAGTCCTGGCTGCCCCGAGGCTACCTCACAGGAATGGCCGGCAAGTGGCACCTTGGGGTGGGGCCTG  
AGGGGGCCTTCTGCCCCCATCAGGGCTTCCATCGATTTCTAGGCATCCCGTACTCCCACGACCAGGG  
CCCCTGCCAGAACCTGACCTGCTTCCCGCCGGCCACTCCTTGCGACGGTGGCTGTGACCAGGGCCTGGTC  
CCCATCCCACTGTTGGCCAACCTGTCCGTGGAGGCGCAGCCCCCTGGCTGCCCGGACTAGAGGCCCGCT  
ACATGGCTTTCGCCCATGACCTCATGGCCGACGCCAGCGCCAGGATCGCCCCTTCTCCTGTACTATGC  
CTCTACCCACACCCACTACCCTCAGTTCAGTGGGCAGAGCTTTGCAGAGCGTTCAGGCCGCGGGCCATT  
GGGGACTCCCTGATGGAGCTGGATGCAGCTGTGGGGACCCTGATGACAGCCATAGGGGACCTGGGGCTGC  
TTGAAGAGACGCTGGTCATCTTCACTGCAGACAATGGACCTGAGACCATGCGTATGTCCCGAGGCGGCTG  
CTCCGGTCTCTTGCGGTGTGGAAAGGGAACGACCTACGAGGGCGGTGTCCGAGAGCCTGCCTTGGCCTTC  
TGCCAGGTCATATCGCTCCCGGCGTGACCCACGAGCTGGCCAGCTCCCTGGACCTGCTGCCTACCCTGG  
CAGCCCTGGCTGGGGCCCCACTGCCCAATGTCACCTTGGATGGCTTTGACCTCAGCCCCCTGCTGCTGGG  
CACAGGCAAGAGCCCTCGGCAGTCTCTTCTTCTACCCGTCTACCCAGACGAGGTCCGTGGGGTTTTT  
GCTGTGCGGACTGGAAAGTACAAGGCTCACTTCTTACCCAGGGCTCTGCCACAGTGATAACCACTGCAG  
ACCCTGCCTGCCACGCCTCCAGCTCTCTGACTGCTCATGAGCCCCGCTGCTCTATGACCTGTCCAAGGA  
CCCTGGTGAGAACTACAACCTGCTGGGGGGTGTGGCCGGGGGCCACCCAGAGGTGCTGCAAGCCCTGAAA  
CAGCTTCAGCTGCTCAAGGCCAGTTAGACGCAGCTGTGACCTTCGGCCCCAGCCAGGTGGCCCCGGGGCG  
AGGACCCCGCCCTGCAGATCTGCTGTATCCTGGCTGCACCCCCGCCAGCTTGCTGCCATTGCCAGA

TCCCATGCCTGAGGGCCCTCGGCTGGCCTGGGCATGTGATGGCTCCTCACTGGGAGCCTGTGGGGGAG  
GCTCAGGTGTCTGGAGGGGGTTTGTGCCTGATAACGTAATAACACCAGTGGAGACTTGACAGATGTGACAA  
TTCGTCCAATCCTGGGGTAATGCTGTGTGCTGGTGCCGGTCCCCTGTGGTACGAATGAGGAACTGAGGT  
GCAGAGAGGTTGAGGACTTGACAAAGATCACCCAGCCAGAAAGAGGTTGGGCTGGGATTGAAACCCTGGT  
GTCGTGGCTCTGGAAGCTGCCCTGGCGCCTTGGTGATCTGCGTGGGTCAGTGCACACAGGCACACGTCAG  
CCTCAAGGACATGGGCACATCTGTTACAGGAGCAGCGCCACGTGCCTTTGAGTGCCAGGAACGGGGTGG  
GAGGGTGGGAGGGTGTGAGGGCCAGAAGACTCAGAAGATGCAAAGTGCCTGAGAGAGACGGGATATTCCC  
CCAGAAGAAGCATTCTTAGAGACACAGGCACTGGACCTCCTTGGTTCTTATAAGAAACCTGTCTGAAGCT  
GGGTGATGAGTTGCACACTCCAGGTGGGGCTAAGGGGCTGGAGCCCCTGCTGGCTCCTAGGAAGGCACA  
GCAGCAGGCCCTGAGACGGCTCCTCTGGGGCCCCCTCCACCCTCCAGGCCTCTGCATTTACCTGTGCCC  
ACACTTCTGTCTCCTGCCTTACCTTTTGACCCACTACTAACGATTCTCCACCAGCAGACAAAGTGATC  
TCTTAAAAATATCTGTTGGCTGGGCACGGTGGCTCACGCCTGTAATCCCAGCACTTTAGGAAGCCGAGGC  
GGGTGGATCACCTGAGGTGCGGAGTTCGAGACCAGCCTGACCAACATGGAGAAACCCATCTCTACTAAA  
AATACAAAATTAGCCAGGTGTAGTGGTGCATCCCTGTAATCCCAGCTACTTGGGAGTCTGAGGCTGGAGA  
ATCACTTGAACCTGGGAGGCGGTGGTTGCAGTGAGCCGAGATCGCACCATTGCACTCCAGCCTGGGCAAC  
AAGAGAAAACTCTGTCTCAAAAAACAAAAATCTGTTAGGCTGCACACGGCGATTCACTCCTGTATTCC  
CAGTGCTTTGGGAGGCTGAGGTGAGAGGATGCCTGAGGCCAGGAATTCAGACCAGCCTGGGCAACATAGT  
GAGACCCAGCTCTAAAGATTTGTTTTGTTTTTTTTTTTTTTTTTTTTTTTTTTTTTTTTTTTTTTG  
AGACGGAGTCTCGCTCTGTGCGCCAGGCTAGAGTGCAGTGGTACCATCTCCGCTCACTGCAACCTCCGCC  
TCCCGGGTTCCAGGGATTCTCCTGCCTCAGCCTCCCTAGTAGCTGGAACTACAGGTGTGTGCTGCCATGC  
CCAGCTAATTTTTTTTTTATTTAATAGAGACAAGATTCACCATGTTGGCCAGGCTGGTCTCAAACCTCTG  
ACCTCAGGTGATCCACCCGCCTCAGCCTCCCAAAGTGCTGGGATTACAGGTGTGAACCACCACACCTGGC  
CAACAATATTTGTTTTAATTAGCCAGGCGTGGTAGCATTTGTCCTAGCAATTTGGGAGGTTGAGGTGGGA  
GAATCACTTCAGCCCACTAGGTCGAGGCTGTAGTGAGCTATAATTGTACCACTGCACTCCAGCCTCGGGG  
ACAGAGTGAGACCCTGTCTGCAAATAACAAATAAAACATCAGGCTGGGCTTGAGCATCTATTCTGCTC

AAAATTTGCGAGGCTTCTCAGAAGAAAATCCAAACCCCTTACAGTGACCCAGTTTGCCCTTGAGGCCTCC  
ACCCACACCCCTTCCCCCAGTCTTAGGGGGTGGCCTGGCTGTTCCCTTCAACGGCAACGCTCTGCCTC  
CATTGTTGGCCTCCTCTGCAGGGAGGGACTGTCTGAGCACCTGCCCCTGTCTGTGCAGCATGGCACACTG  
ACGTCAGGCCCACGTGCATGCCCAGGTGGCCAGTCACACGCCAGGTGCTCCCTCAGTGTTGGCCAAGTGA  
GAGGAGCACACCTTCCGGGCGTTCAGACACCTCCCCGTGGCAGACACCGTTCGTTGCTACCAAACAGCCA  
CCTCCTTCCTAATGGGCTCCCATTTTTTCAGTGCTGGGCAAAGGTCCCTTGATCTTGAGTTGCAGCCTCT  
TTCTCTCCAAGGAGGGCGGTGACCAGCCTGAGCCAGTCAATCCAGTGATTGGTTCAGGAGTAGCCTGTGA  
CCAGGAGTCCTGGTAGTGAACGACTGGGGCAGCCCTGGGGGTGAGGACCTTGCGCAGCCGTCACAGGCC  
TGATTGGACACTGGGCAGCTGCTAACCCAGTGTCTCCAGCTGCCTACCTGGAGAGCTCCAAGCGTAAGAA  
AATAAACCTGCCTGTTGAAGCCA

>NM\_000046.5 Homo sapiens arylsulfatase B (ARSB), transcript variant 1, mRNA

ATTCTATCAGCGGTACAAGGGGCTGGTGGCGCCACAGGCGCTGGGACCGCGGGCGGACAAGGATGGGTCC  
GCGCGGCGCGGCGAGCTTGCCCCGAGGCCCGGACCTCGGCGGCTGCTCCTCCCCGTGCTCCTCCCGCTG  
CTGCTGCTGCTGTTGTTGGCGCCGCCGGGCTCGGGCGCCGGGGCCAGCCGGCCGCCCCACCTGGTCTTCT  
TGCTGGCAGACGACCTAGGCTGGAACGACGTCGGCTTCACGGCTCCCGCATCCGCACGCCGCACCTGGA  
CGCGCTGGCGGCCGGCGGGGTGCTCCTGGACAATACTACACGCAGCCGCTGTGCACGCCGTGCGGGAGC  
CAGCTGCTCACTGGCCGCTACCAGATCCGTACAGGTTTACAGCACCAAATAATCTGGCCCTGTCAGCCCA  
GCTGTGTTCTCTGGATGAAAACTCCTGCCCCAGCTCCTAAAAGAAGCAGGTTATACTACCCATATGGT  
CGGAAAATGGCACCTGGGAATGTACCGGAAAGAATGCCTTCCAACCCGCCGAGGATTTGATACCTACTTT  
GGATATCTCCTGGGTAGTGAAGATTATTATCCCATGAACGCTGTACATTAATTGACGCTCTGAATGTCA  
CACGATGTGCTCTTGATTTTCGAGATGGCGAAGAAGTTGCAACAGGATATAAAAATATGTATTCAACAA  
CATATTCACCAAAAGGGCTATAGCCCTCATAACTAACCATCCACCAGAGAAGCCTCTGTTTCTCTACCTT

GCTCTCCAGTCTGTGCATGAGCCCCCTCAGGTCCCTGAGGAATACTTGAAGCCATATGACTTTATCCAAG  
ACAAGAACAGGCATCACTATGCAGGAATGGTGTCCCTTATGGATGAAGCAGTAGGAAATGTCACTGCAGC  
TTTAAAAAGCAGTGGGCTCTGGAACAACACGGTGTTTCATCTTTTCTACAGATAACGGAGGGCAGACTTTG  
GCAGGGGGTAATAACTGGCCCCCTCGAGGAAGAAAATGGAGCCTGTGGGAAGGAGGCGTCCGAGGGGTGG  
GCTTTGTGGCAAGCCCCTTGCTGAAGCAGAAGGGCGTGAAGAACCGGGAGCTCATCCACATCTCTGACTG  
GCTGCCAACACTCGTGAAGCTGGCCAGGGGACACACCAATGGCACAAAGCCTCTGGATGGCTTCGACGTG  
TGGAAAACCATCAGTGAAGGAAGCCCATCCCCAGAATTGAGCTGCTGCATAATATTGACCCGAACCTCG  
TGGACTCTTCACCGTGTCCCAGGAACAGCATGGCTCCAGCAAAGGATGACTCTTCTCTTCCAGAATATTC  
AGCCTTTAACACATCTGTCCATGCTGCAATTAGACATGGAAATTGGAAACTCCTCACGGGCTACCCAGGC  
TGTGGTTACTGGTTCCTCCACCGTCTCAATACAATGTTTCTGAGATACCCTCATCAGACCCACCAACCA  
AGACCCTCTGGCTCTTGATATTGATCGGGACCCTGAAGAAAGACATGACCTGTCCAGAGAATATCCTCA  
CATCGTCACAAAGCTCCTGTCCCGCCTACAGTTCTACCATAAACTCAGTCCCCGTGTACTTCCCTGCA  
CAGGACCCCCGCTGTGATCCCAAGGCCACTGGGGTGTGGGGCCCTTGGATGTAGGATTTAGGGAGGCTA  
GAAAACCTTTCAATTGGAAGTTGGACCTCAGGCCTTTTCTCACGACTCTTGTCTCATTTGTTATCCCAAC  
CTGGGTTCACTTGGCCCTTCTCTTGCTCTTAAACCACACCGAGGTGTCTAATTTCAACCCCTAATGCATT  
TAAGAAGCTGATAAAATCTGCAAACTCCTGCTGTTGGCTGGAGCATGTGTCTAGAGGTGGGGGTGGCTG  
GGTTTATCCCCCTTCTAAGCCTTGGGACAGCTGGGAACTTAACTTGAAATAGGAAGTTCTCACTGAAT  
CCTGGAGGCTGGAACAGCTGGCTCTTTTAGACTCACAAGTCAGACGTTGATTCCCCTCTGCCAATAGCC  
AGTTTTATTGGAGTGAATCACATTTCTTACGCAAATGAAGGGAGCAGACAGTGATTAATGGTTCTGTTGG  
CCAAGGCTTCTCCCTGTCGGTGAAGGATCATGTTGAGGCACTCCAAGTGAACCACCCCTCTGGTTCACC  
CCTTACTCACTTATCTCATCAGAGCATAAGGCCCATTTTGTGTTGTTGAGGTCAACAGCAAAATGCCTGC  
ACCATGACTGTGGCTTTTAAAAATAAGAAATGTGTTTTATCGTAATTTATTTCCCCCAGCCATTGCTC  
ACTCTGTCTAGACTTCCTGCCACTTCCAATTCTTCTGTGGCTTTTCTGCCTTTCCTTTTGACCTCAGTA  
GTCCTATCCCTGGGAAGGCCACTTTGCTTCTCTACCTGAGCACCCCTGATTTCTGGAACGCTGCTGAGCC  
CTGCCTTACTTTTGCCCCTAGGGCTGAAGCTAGAGGCCTCCCCGTAATAGGCGGTGGAGTTGCTCTGTGA

GGATGTTTCATGGTAGACACTAAGAGGGCTGGGTGGGAGATGCTTGGCTCTGTGGCATCTGTTTCAGCGAGG  
CTTTTCCTATATTGCATGGAGTTAGTCATTGTGATTGTAGCTTTATTTTCATAATATATTAAGACTTGCAC  
TGCTATTTACTAGCAGTGAGAAGAAACCTCAGGAAAGGATATGAAAAAGCAAGTGGCCAGTGTCTGGGAT  
ACTGGGCCTTGGTAAAGCAGAGGAGGGCACACCCACAGTCCTCTTATTCTCTGTTTTACTGCTTGTTTTG  
AGGTTCTGGGGTCTGGCAAAGAGGATGCAGTTTGACACCTGCAGCCCTTCTCAATCCCACTAATGTCTT  
ACTAATGTGGAACAGTCCATATTAGCTCCAGAGAGTGTCAAACCCAGAGAAATGTGTGCAAAAATGATAC  
TCTTTTCTGCATTAGCCCCACCATTTGTGTTACCAATGCTTGGAACTGCCTGAAGGCACTCATTTTTT  
AATTTTTATTTTATTTTAAATTTTTATATCTTTATGAGACGATCTCACTCTGTCACCAGGTTGGAGTAC  
AGTGGTACAATCACAACCTACCGTAGCCTCAAACCTCTGGGCTCAAGTGATTCTCCACCTCAGGCACCC  
AAATAGCTGGAACCTACAGGCATATACCGCCACACCCAGCTAATTTTATTTTTGAAAAGACAAGGTTCCC  
TATGTTGCCAGCTGGTCTTAAACTCCTGGGCTCCAGCAATTATCCAGCTTGGGCTCCAAAAGTGCTGG  
GATTACAGGCATGAGTCACCATGCCTGGCCTCATTTTTTAAAACAAATGAATAAATGGACAAATGAGTAA  
ATGAGAAAGTCTCACACCATGAAAGATGCTAGTCCAATGAGCTGAATACAGAGGTAATATAAATGTCTTC  
CAGCTGTTGCTTTTCTGTTCTCAAGCTGCCCCTCCTGGGGTAGGAGCATAATCTACATCACTGGGCAGTC  
ACAGGACACTCTATAGCAAGGTTGTAGCGTCCTCTCCAGTGGGGGGAGAAAAGGAACTGTGCCTACCAAA  
GGTACTCTCTTGTCAGCAATTTCCATTTCTATACTTTATGGGACACTAGAACTAAAAGCAACAAATAAT  
CTGATATAAGTCCTTGATAGTCATCCTTCAATTCAGTAGCAATATTTTCTGGTCACTACTAACCTGTAT  
TGTATTAAGTGAAGTATTGGAAGGAAATGGTGCTAAACTAATAACATCTCTTACCAACCTTTACCCA  
ACTCCTGGGTTGGCAAACAGCTGACCAAACCTGCCATCACCTCCCACTTGGAAGTGTATGGCCGACAGCAT  
GAAATAGCTGAGCCAGATGTTCTTCTGCATCCTCCGAATCCAGGGCTGGGTGTAGGTAGCCGTTGGA  
GGCCATCGCTACAGGGCACCTATCTGTTATCGTGCTGTCTCCCAACAGCTGTCTCCAGTTCTAGTTCC  
TTGGTTTTCAGGCACAGTGGGGGATGTTCTGCACCCAGTGGACTTCAAAGAGTTTTGAAGACTTAATTT  
TTTGTAACAAGTACTTGAGATTTTGGTTTATCCATAATAGAATGTATTTTATTAGATTCTCTGATTCT  
ATATAAGAATGTGAAAAGATTGATATATTGTTGTTAGAAATAATGTTATTTCTTCCAATTTTTTTTTT  
TTTTTTTTGAGATGGAGTCTCGCTCTGTCAACCCAGGCTGGAGTGCAGTGGTGTGATCTCGGCTCACTGC

AGCCTCTAACTCCCAGGTTCAAGCTATTCTCCTGCCTCAGCCTCCCAAGTAGCTGGATTACAGGCATACA  
CCACCACGCCTGGCTATGTTTTGTATTTTCGTAGAGATAGGGTTTCACCATGTTGGCCAGGCTGGTCTC  
AAACTCCTGACCTCAAGTGATCCACCCACTTCAGCTTCCCAAAGCACTGGGATTACAGGTGTGAGCCACT  
GTGCCC GGCAAATTTTTTTACCTTTACAGAAGGTTTGCTTATTTAATTGTGAGCTCATTTTTCTTTGTT  
ACTTTTGTCCCCCAGATTTGGGGGACAAAATAAAATTAATCTTTTAAAATGTGTCAGCCATATGTATGG  
GGCTTCCATTTGGGGTGAGGAGAAAAGTTCTGGAAGTAGATAGTGGTCATGGTTATACAACATCATAAATG  
CAATTACTGCCACTGAATTGTATGTTTTAAAGTGGTTAAAATGTAAAGTTTTATGTTTTATTACAATTTT  
TAAATGTGTCAACCAACTTTATAGTACATAAATTATATCTCAGTAAAGCTGTAAATAAATAAATATAGT  
AAAAATTTTAGAACTAAAAAAA

>NM\_001675.4 Homo sapiens activating transcription factor 4 (ATF4), transcript variant 1, mRNA  
AGCCATTTCTACTTTGCCCCCCACAGATGTAGTTTTCTCTGCGCGTGTGCGTTTTCCCTCCTCCCCGCC  
CTCAGGGTCCACGGCCACCATGGCGTATTAGGGGCAGCAGTGCCTGCGGCAGCATTGGCCTTTGCAGCGG  
CGGCAGCAGCACCAGGCTCTGCAGCGGCAACCCCCAGCGGCTTAAGCCATGGCGTGAGTACCGGGGCGGG  
TCGTCCAGCTGTGCTCCTGGGGCCGGCGCGGGTTTTGGATTGGTGGGGTGCGGCCTGGGGCCAGGGCGGT  
GCCGCCAAGGGGGAAGCGATTTAACGAGCGCCCGGGACGCGTGGTCTTTGCTTGGGTGTCCCCGAGACGC  
TCGCGTGCCTGGGATCGGGAAAGCGTAGTCGGGTGCCCGGACTGCTTCCCCAGGAGCCCTACAGCCCTCG  
GACCCCGAGCCCCGCAAGGGTCCCAGGGGTCTTGGCTGTTGCCCCACGAAACGTGGCAGGAACCAAGATG  
GCGGCGGCAGGGCGGCGGCGGGCGGTGAGTCAAGGGCGGGCGGTGGGCGGGGCGCGGCCGCCCTGGCCG  
TATTTGGACGTGGGGACGGAGCGCTTTCCTCTTGGCGGCCGGTGGAAGAATCCCCTGGTCTCCGTGAGCG  
TCCATTTTGTGGAACCTGAGTTGCAAGCAGGGAGGGGCAAATACAACCTGCCCTGTTCCCGATTCTCTAGA  
TGGCCGATCTAGAGAAGTCCCGCCTCATAAGTGAAGGATGAAATTCTCAGAACAGCTAACCTCTAATGG

GAGTTGGCTTCTGATTCTCATTAGGCTTCTCACGGCATTAGCAGCAGCGTTGCTGTAACCGACAAAGA  
CACCTTCGAATTAAGCACATTCCTCGATTCCAGCAAAGCACCGCAACATGACCGAAATGAGCTTCCTGAG  
CAGCGAGGTGTTGGTGGGGGACTTGATGTCCCCCTCGACCAGTCGGGTTGGGGGCTGAAGAAAGCCTA  
GGTCTCTAGATGATTACCTGGAGGTGGCCAAGCACTTCAAACCTCATGGGTTCTCCAGCGACAAGGCTA  
AGGCGGGCTCCTCCGAATGGCTGGCTGTGGATGGGTTGGTCAGTCCCTCCAACAACAGCAAGGAGGATGC  
CTTCTCCGGGACAGATTGGATGTTGGAGAAAATGGATTTGAAGGAGTTCGACTTGGATGCCCTGTTGGGT  
ATAGATGACCTGGAAACCATGCCAGATGACCTTCTGACCACGTTGGATGACACTTGTGATCTCTTTGCCC  
CCCTAGTCCAGGAGACTAATAAGCAGCCCCCAGACGGTGAACCCAATTGGCCATCTCCAGAAAGTTT  
AACAAAACCCGACCAGGTTGCCCCCTTACCTTCTTACAACCTCTTCCCCTTTCCCAGGGGTCCTGTCC  
TCCACTCCAGATCATTCTTTAGTTTAGAGCTGGGCAGTGAAGTGGATATCACTGAAGGAGATAGGAAGC  
CAGACTACACTGCTTACGTTGCCATGATCCCTCAGTGCATAAAGGAGGAAGACACCCCTTCAGATAATGA  
TAGTGGCATCTGTATGAGCCCAGAGTCCTATCTGGGGTCTCCTCAGCACAGCCCCTTACCAGGGGCTCT  
CCAAATAGGAGCCTCCCATCTCCAGGTGTTCTCTGTGGGTCTGCCCGTCCCAAACCTTACGATCCTCCTG  
GAGAGAAGATGGTAGCAGCAAAAGTAAAGGGTGAGAACTGGATAAGAAGCTGAAAAAATGGAGCAAAA  
CAAGACAGCAGCCACTAGGTACCGCCAGAAGAAGAGGGCGGAGCAGGAGGCTCTTACTGGTGAGTGCAAA  
GAGCTGGAAAAGAAGAACGAGGCTCTAAAAGAGAGGGCGGATTCCCTGGCCAAGGAGATCCAGTACCTGA  
AAGATTTGATAGAAGAGGTCCGCAAGGCAAGGGGGAAGAAAAGGGTCCCCTAGTTGAGGATAGTCAGGAG  
CGTCAATGTGCTTGACATAGAGTGCTGTAGCTGTGTGTTCCAATAAATTATTTTGTAGGGAAAGTAAAA  
AAAAAAAAAA

>NM\_007348.4 Homo sapiens activating transcription factor 6 (ATF6), mRNA

AGATATTAATCACGGAGTTCCAGGGAGAAGGAACTGTGAAATGGGGGAGCCGGCTGGGGTTGCCGGCAC  
CATGGAGTCACCTTTTAGCCCGGGACTCTTTCACAGGCTGGATGAAGATTGGGATTCTGCTCTCTTTGCT  
GAACTCGGTTATTTACAGACACTGATGAGCTGCAATTGGAAGCAGCAAATGAGACGTATGAAAACAATT

TTGATAATCTTGATTTTGATTTGGATTTGATGCCTTGGGAGTCAGACATTTGGGACATCAACAACCAAAT  
CTGTACAGTTAAAGATATTAAGGCAGAACCTCAGCCACTTTCTCCAGCCTCCTCAAGTTATTAGTCTCG  
TCTCCTCGGTCACTGGACTCTTATTCTTCAACTCAGCATGTTCTGAGGAGTTGGATTTGTCTTCTAGTT  
CTCAGATGTCTCCCCTTTCTTATATGGTGAAAACCTAATAGTCTCTCTTCAGCGGAGCCACTGAAGGA  
AGATAAGCCTGTCACTGGTCCTAGGAACAAGACTGAAAATGGACTGACTCCAAAGAAAAAAATTCAGGTG  
AATTCAAAACCTTCAATTCAGCCCAAGCCTTTATTGCTTCCAGCAGCACCCAAGACTCAAACAACTCCA  
GTGTTCCAGCAAAAACCATCATTATTAGACAGTACCAACGCTTATGCCATTGGCAAAGCAGCAACCAAT  
TATCAGTTTACAACCTGCACCCACTAAAGGCCAGACGGTTTTGCTGTCTCAGCCTACTGTGGTACAACCT  
CAAGCACCTGGAGTTCTGCCCTCTGCTCAGCCAGTCCTTGCTGTTGCTGGGGGAGTCACACAGCTCCCTA  
ATCACGTGGTGAATGTGGTACCAGCCCCTTCAGCGAATAGCCCAGTGAATGGAAAACCTTTCCGTGACTAA  
ACCTGTCCTACAAAGTACCATGAGAAATGTCGGTTCAGATATTGCTGTGCTAAGGAGACAGCAACGTATG  
ATAAAAAATCGAGAATCCGCTTGTCAGTCTCGCAAGAAGAAGAAAGAATATATGCTAGGGTTAGAGGCGA  
GATTAAAGGCTGCCCTCTCAGAAAACGAGCAACTGAAGAAAGAAAATGGAACACTGAAGCGGCAGCTGGA  
TGAAGTTGTGTCAGAGAACCAGAGGCTTAAAGTCCCTAGTCCAAAGCGAAGAGTTGTCTGTGTGATGATA  
GTATTGGCATTATAATACTGAACTATGGACCTATGAGCATGTTGGAACAGGATTCCAGGAGAATGAACC  
CTAGTGTGAGCCCTGCAAATCAAAGGAGGCACCTTCTAGGATTTTCTGCTAAAGAGGCACAGGACACATC  
AGATGGTATTATCCAGAAAAACAGCTACAGATATGATCATTCTGTTTCAAATGACAAAGCCCTGATGGTG  
CTAACTGAAGAACCATTGCTTTACATTCTCCACCTCCTTGTCAGCCCCTAATTAACACAACAGAGTCTC  
TCAGGTAAATCATGAACTTCGAGGATGGGTTCATAGACATGAAGTAGAAAGGACCAAGTCAAGAAGAAT  
GACAAATAATCAACAGAAAACCCGTATTCTTCAGGGTGCTCTGGAACAGGGCTCAAATTCTCAGCTGATG  
GCTGTTCAATACACAGAAACCACTAGTAGTATCAGCAGGAACTCAGGGAGTGAGCTACAAGTGATTATG  
CTTCACCAGAAAGTTATCAAGACTTTTTTGAAGCCATCCGCAGAAGGGGAGACACATTTTATGTTGTGTC  
ATTCGAAGGGATCACCTGCTGTTACCAGCTACCACCCATAACAAGACCACAAGACCAAAAATGTCAATT  
GTGTTACCAGCAATAAACATAAATGAGAATGTGATCAATGGGCAGGACTACGAAGTGATGATGCAGATTG  
ACTGTCAGGTGATGGACACCAGGATCCTCCATATCAAAGTTCGTGAGTTCCTCCTTACCTCCGAGATCA

GCAGAGGAATCAAACCAACACCTTCTTTGGCTCCCCTCCCGCAGCCACAGAGGCAACCCACGTTGTCAGC  
ACCATCCCTGAGTCATTACAATAGCACCTGCAGCTATGCTGGAAAAGTGAAGCGTGGGACCCTGCCAGAC  
TGAAGAGCAGGTGAGCAAAATGCTGCTTCTGCCTTGGTGGCAGGCAGAGAACTGTCTCGTACTAGAATT  
CAAGGAGGAAAGAAGAAGAAATAAAAGAAGCTGCTCCATTTTTTCATCATCTACCCATCTATTTGGAAAGC  
ACTGGAATTCAGATGCAAGAGAACAAATGTTTCTTCAGTGGCAAATGTAGCCCTGCATCCTCCAGTGTTAC  
CTGGTGTAGATTTTTTTTTCTGTACCTTTCTAAACCTCTCTCCCTCTGTGATGGTTTTGTGTTTAAACA  
GTCATCTTCTTTTAAATAATATCCACCTCTCCTTTTTGCCATTTCACTTATTGATTCATAAAGTGAATTT  
TATTTAAAGCTATGCCACACATGCATGTTCAAATGGTTTCCACTGATTCGATTTTTTCATTCATTTAATGC  
AAACCCATTCTGGATATTGTGCTTATTTGAGAAAACACATTTCAAACCAGAAAAGCCAAAAACACTCCA  
AAAACAAGCAAAACAATTTGGAGCTTTAGATAAAAGGAAAAACTCCCAGTTGGTAAAGTTTATCTTTACT  
TAGGATTTGTGGCTCACACCTAAACAAAGGGGGTCAGGGAGTGGGTACAAATTTGAGAAAATAGAAGGGT  
AAGGGAAGGGCCAGTGGTGGGGTTTGGAGAGAGGAGATAGCTCCATTAATACACATGTTTAAAAGATGGA  
AAGTTCACGCCTGTAATCCCAGCACTTTGGGAGGCCGAGGCGGGTGGATCACGAGGTCAGGAGATCAAGA  
CCATCCCGGCTAAAACGGTGAAACCCCGTCTCTACTAAAAATACAAAAAATTAGCCGGGCGTAGTGACGG  
GCGCCTGTAGTCCCAGCTACTTGGGAGGCTGAGGCAGGAGAATGGCGTGAACCCGGGAGGCGGAGCTTGC  
AGTGAGCCGAGATCCCGCCACTGCACTCCAGCCTGGGCGACAGAGCGAGACTCCGTCTCAAAAAAAAAA  
AAAAAAAAAAAAAAAAAGATGGAAAGTTCGATGTGACTGCAGTATGAGATTAAAGCCACAACCTATTGTTTATT  
TTGGGGACTCTAGGCCACCAAGTATTAGCACACATACTTATGTTTTCTCTACTAATCTGGTCCAGGTCCT  
CATGGACCACAGGACAAAGCTTTTCAATTTTCAATTCATTCTTCTATTGAAATTATACCAAATTCAGCTGAGG  
AATATGGAAGTAACTTTAGACTTAAACAAGACAAAAGTTTTTTCACTGAAGAATTGACAAGTATTTGCTC  
CTTAAACAACGCAGATTAGTGAACGTGGATTCTGCTGAGGGAGTGCATCCATAATATGGCAATAATT  
TTCAGTTTCTCCAACGAAAAGATAGTGAAGGAATTAATCTTTTGTCTCCCATGGTTAAAAAAAAAAAA  
AAAGCTGTGTTCAATTTTTACTGTACTATGCCTCTTTTTTACCATAGTAGACAATTATGTTTCATTTGAT  
GAATTCATAGAACTGGATCTCATACAGCGATGTCCTCTAATGTTCTACCTTTCAGTTTCTAAAGTGAG  
TCTTCTCCCTCTCTACAAAACCTTTTCAATTTTTTGATGTAACCTCATCTACAAATACTGTTTCTTACCC

CAGTTGACTTGCCTTTGTCAGATTTCTTCTTGTTCACACTATAGCAATCAATTTCTTCTTCTTACA  
AGAAAGGGAACGAGAAATTGTAGCAACCTCTCAAGGATTATATGCAGCTAGTTAGTTTTCTGCCTGTGAA  
ATTAGGTCTGGCTCCTAAATAATTTTAAAGAACCATCAGCACTTCTAACTCTCTGGACAGGTGCCTCTTT  
GTCCAAGCTAGTTAAATGCTTTCCAAGGAAATCAGTTCAACTTTTGTGAGCGGGGAAAAGCAGGGCTTTA  
TTGTTGTGTTACCTGGGAGTCTGGAGTTTGAAAAGTGCTAATTAACCTTCTCTTTTTCCACATTACAAA  
CCTTTTTAAGCAGCGCAGCACTCCCCTTAGATTTGGCTATCCTGGGTGATTTTCAGACAAGAACCATTTT  
CTCTGGGGACCATTCTTCTGCTGGGTGCCAAGGAATATAAGGCAAATGCCCAGAAGACCTTCAGGTGACT  
GGGCAGTCTTATCATGGGATATTTCTTCTGGCCCTGCCCTTCCCATTCTGTAATGTGAATTAGCCACAC  
CAGAGGCTGTGACCATGGCTAGTAGACAGTGGCAACATAGTCATCCCCAAGATGCTAATCTTCTGCTGGA  
ACTGTCATACGTTATCATGGTCAATGTAAACCTGGTTTGTGTGGGGTGATTATAAATAGAGTTTCCCTCC  
TCTCTGTGACAGAATCACAGGAGAAGGACCCATCTCGTGGCCTTCTTGTCTTAGCGCTTCACTTTTACT  
TCATCCCTCGATTCCCAGCTTTTTCTATCATCATTTTGCCAACTCCTCAGATGCAAGACTTTGGTTATGT  
CATACTACCAACGTTAGTCCCTCTCTTCCAGGTGAAAAGGTGGGTAGCGGTTGGGAGGGAGTCTCCACT  
GAAGAGCAGGAAGGTGGTAGCAGGGCCGGCAGCTCTGCCACAGAGCTAGGGGTGCCTGTAAGGTGCCGCC  
TAGAGCAGCCTGGGAGCTTTGCCTTCTTTGTCTCTCACTAGCCCTTCTACTCTTTGTCATTGCCTGTTT  
TTGAGTGGATCTTTGAAATGAGGGGACAGGATTCTCCTAAGGGTAGAGTTTCAGGAAATGAGTGAAAGGC  
AATTGACAAATGCAAAGAAGTAGTCACTTTTTAAATTGCTGGCAAAGCTATAATTAATCCCTAGGCACAA  
TTGTAGTTTTTATTTAATGTTTGTATGCACAAGGCCCTTTAGGAAATGAGAAGTTGCCATGCCAGATTA  
ATTTTTTTTTTTTTTTTTGGTGGGATTGCCTTTTGGGGTTGCAGCCAGAAATTGTGGGTAATGTGTGTA  
TTTTTTTATTTATTAAATTTTAAACAGGATTGTGCAAGCTTATGAGACAATTAGATAAACTCATGGAGGA  
GGCAGGTCCTCCTGTTATTAGATGATTTTGTGCTCTTGGGGCTGACAATAATACACTCTTGGGAAGTGAT  
GGTAGAGACTGATGGGAATAGTCTTTCTGCCTGGTTGCAAGTCCCAAATTTTAAAGGGTTAATGGAAGTA  
AGTGGATGTTTCCTCATGTTAACACTGAATCAGATGTTAGGAGCTTGTCCTTTGGGGTTGACTTATGC  
CCAGCAGTACAGGGACACAGCTTCATTAGAGTGTTAGTGTAACCTAACTCCAAAGTTAGGAGTTAATGTG  
AAAGGATCATCCTTGAAACAAATCTGCTGTTTGCCATGCTTGTAGTACAGAACTTCACATGGAGTTTTG

GGTGGGATTTGTGTTTTACAAAGTAAAAAATCCCTCACGATTATAAACTCAGAGCATCATCTAATTTTT  
TTTTTAATGACTACAAGTTCAGCACAAAAGTGGCATTCTTTGCCATTCTTGCCAGTAAGAAGTTGA  
CACGGAGGTATTTGAAAGCAATGTTATGTGAGTCATTCTTAAGTGTCCAAGTAAGTTAGAAACAGAAA  
AGGAACTTGGGATTCAAATTGATTTTTCAAATCATTTTTAAAGAGACATCATCCTGACTAAATCTTAGCC  
TGAACCTCCTCCCCTGTGTGATTCCCCGGTAGTCACCGCAGCGAGATGCTGGTGAGACTGCCGTGGTG  
GCATTTAGCATCGTTAAAACTGGAAAAGTCTCAAGCTCTTTGCCACTTCTCTACTATTTTTTGATTCTTG  
CCATTTTACCAAGCTTAGGTTGTGAAAAGTGGACAGAAATGTATTACAGGAAAAAGTTATAATTGTATTG  
ACTTTCTAACACATTGCAAAGTTTCAAAGTGACTTTCACTTTCAACAACATATTAGAAGTAACCACTTTT  
GCTTTCACAGCCTGAAGAGTTAGAGCCTGATCTGATGCCCCCTTCACTCTGAAGTCATGGGAAATTTTC  
CAGCCATGAAAGCCCTCTTCCACTGCATACTGATGGGCTGACTCAGCTTCCTTCAGCCGACTGAGATCT  
TTTCATACTATTGGCTATTTCATACCAATTAACCTCTTAAATAAGATTGTGAATTGCCAAAATTGATAGA  
CACTTATTACCACCTGTGGACTCCATATTCCTTACCACAAATGTTATTTTCATCAGTCCTGAGTCATTTT  
AACTTACAGAAATTAGGATTGTTGCTGCTAATATGAATACCAATTATAACTTTTAGAAACAAGAATAAAG  
CCTAAAAGAGAATGAAATATAAGAAATGTTGTTCCACCCCTAATAACATTTGGAAGTGAATATTCCCA  
TTTTCTTCCACCCACAGGGATTGGGATTGATTTTTAATTCCTAGGAAACAATACTAGACTACCCAAAAA  
GATGTTGCCAGAATCCAAAAGGAACTATGCTCGTAAAAGAAATGCAGTTTTCTCCTACCTAAAAAAAAGA  
AAGTAAAGTGTGTTCTGTTCTTATCTTTTTAATGACTAAGCTTTAAACAGTTTATTTTGGGTAAGACTAG  
AACTTTCGGCCATTGTTCTAATATGTGTGTTATTAGATGCAATAGAATTTATGAAAAGAAGAATGACAA  
AGGTATCTGATTAGAAAATTTGATCTTACGCATGAATCCATGTCATGGCCAGCCACTGTCACATAGTGGG  
TGCCATTCTCAACATATTGGTTTGCTAACTTTAAGCATTAGGGATTTAGCACACTAAAATACTTTTAATT  
ATATTAGGTTTGGTAACTAAGGAGTAAATAAATCATAATTTATCATTTGCCAAGGCCAACAAACAACACT  
ATTGTGCTGTTTGCTCTCAATGAAGTTGAATAAACCAGGAGGCTTGGCATATCCCCTTTATGTTAATCCC  
AGCTAGAGATTAGTAGGTTGACTTTCACAGCAATTGTATATTGATCCATTTTAACTCATCCTTGCCATAA  
TTTCCAGGCCAGTCACCAGGACAGAGGAGATGATGGGGAAACAGAGCTTTAGATGAAAAGTACTATGCAC  
TACTAGCCTTAGAGGCACTGGTTTCCTGTTACCACTTTGGCAAGTATGGATGGTCTAAGTCCAGTAGGGC

TTCATCCATGGAGCCATTAGAACTGAGGGGGGAGTGTTAGAGATGCCATTCACCAGGATCTTTTTGCTC  
AGGTTGTACCCATGCCAATTGAAGAACGTGTTAAAGATGAGGAGGAGAGATGTACCATTCTCTCCCTTAA  
TAATGATGTTGGTTTGCAAAACCTAAAGAAATAATAACAACAGACTATTCATACTTTCAAGCAAGTCTT  
TATACTACCTGTTATTTCTCTAAAATTCAAATAAAGAATTTTTAAACTTA

>NM\_001131028.2 Homo sapiens autophagy related 10 (ATG10), transcript variant 3, mRNA

GCAGTGCGCACGCTCCGACTCGGCCGTGGCGGACCTGACTGAAGGAGGCCGCGGACCTGACTGAAGGAGG  
CCACGGCCACTTCTGGTTGGCCTCGGGGCGCGCTGGCTCGGCTCTTCCTCCGCCCTCGAGGCCCCCGCAG  
TCCCATCATTCAGTTCCGTAGGGTCACCGGCGCGGCAGTGGCCTCGCAGGGCGCTGGGTCCCTCTCCCCA  
GCTCTCCTCCCCCTGGCCCCGTGCCCCGCCCTCGCCGGGCTGGGCTGCGGGGTCAGGGGCCGAGCGGAG  
AGGGTAGAGACGGGGTTTCACCGTGTTAGCCAAGATGGTCTCGATCTCCTGACCTCGTGATCCGCCCCGCC  
TCGGCCTCCCAAAGTGCTGGGATTACAGGCGTGAGCCACTGCGCCCGGCCTGTTGTACAGTTATTAAAGT  
TATCATTTAACATGGAAGAAGATGAGTTCATTGGAGAAAAACATTCCAACGTTATTGTGCAGAATTCAT  
TAAACATTACAACAGATAGGTGATAGTTGGGAATGGAGACCATCAAAGGACTGTTCTGATGGCTACATG  
TGCAAATACACTTTCAAATTAAGAATGGGTCTGTGATGTCACATCTAGGAGCATCTACCCATGGACAGA  
CATGTCTTCCCATGGAGGAGGCTTTCGAGCTACCCTTGGATGATTGTGAAGTGATTGAAACTGCAGCAGC  
GTCCGAAGTGATTAAATATGAGTATCATGTCTTATATTCTGTAGCTACCAAGTGCCTGTACTTTACTTT  
AGGGCAAGCTTTTTAGATGGGAGACCTTTAACTCTGAAGGACATATGGGAAGGAGTTCATGAGTGCTATA  
AGATGCGACTGCTACAGGGACCATGGGACACTATTACGCAACAGGAACATCCAATACTTGGGCAACCCTT  
TTTTGTACTTCATCCCTGCAAGACGAATGAATTCATGACTCCTGTATTAAAGAATTCTCAGAAAATCAAT  
AAGAATGTCAACTATATCACATCATGGCTGAGCATTGTAGGGCCAGTTGTTGGGCTGAATCTACCTCTGA  
GTTATGCCAAAGCAACGTCTCAGGATGAACGAAATGTCCCTTAACAAGATTCTTCTATTGAGTTTAGGAA  
TTGCGGCACGAAGAATGCCAAGAGTTTACCTGGCCAGCCCTGGCTTTAATAGGACTGATACCATGGAATA  
TTTCATCTACCAAGATGTGACATGGATTATTTTTCCCTTGGACACAAATGTCTACAGCAACTGGTGTTT

GATAGGCTGAATGTTTAGAAGAAACACTTCAAAGGGATACATCATGGCCAGGCATGGTGGCTCACACCTG  
TAATCCAAGCACTTTGGGAGGCCAAGGTGGGAGCATCACTTGATCCTGGGAGTTCGAGACCAGCCTGGGC  
AACATGGTGAAACCCTGTCGGTACAAAAAATACAAAAATTTGCCTGTTTATGGTGGTGTGTTCTGTAG  
TCCCAGCTCCCCAGGAGGCTGAGGTGGGAGGTTGGCTTAACCCAGGAGGCAGAGGTTGCAGTGAGCTGA  
GACTGTGCCACTGCAGTCCAGCCTGGGTGACAGAGCCAGACACTGTCTCGGGGAAAAAAAAAAAAAAAAA  
AAGACACATCACTATAAATAGCAAAAAACAAATCTAACTTATTAATACTAGGAATACCAACATTATTAG  
GGCACTTGCAGGTTATTCTTTCTAGGCCAAGTACTTCACTTCATTTGTCTGACATGGAGATTGAGGGA  
GAAATGTATTTGTGTGTTCATTTTAATGTAAGATATATAAAAATTAAATTACTGGATTTACCTGTCCCTG  
AAACTGGTGTTATAAACATGACCTATCTTAAGTGATTTTCCACAATCAAACCTCAGGAACAATAGATTAT  
TTCTGTTTTACTCCAAAAGAGAGAGAGAGAGTGAAGTGTGAGTGTGTGTGTGTGTGTGTGTGTATGTGTGG  
GTGTTTGTGTAGATAGTTGTAAAACAAAGAAAAACACAATATTTTACTGTGAGATAATATGTTTTACCA  
GCAAAGTGTGGCATAGTAATTAGAAGTTTTCTAAAAAGCTATAGGAGATATTTAAACATTAAAATTTCTT  
TTTGACCTATAGTAATAAAACAATGGTCATTTTACCCCTCTGCTTCTCAACCCACAGCTGCTCTGCTGT  
ACTCTTTGAGGGCTCTTGAGCGAGTCTTCATGTCCCTGAGACTTATTTTCCTCATCTTTAATTTGAACT  
AACAAGCTACCTCATAGGGTTGCTGTGAGAACCACATGAGATCATTAAATGCATGATAAGATATTGTAAAG  
TATTATACGAATATTCATTAAATGCTCACCTTTCTGTATATAATTGGTATTCATAAGGCTGTAAATAA  
GTTTCATAGCCAGTTAAGTATTAAGATAAACCTAACCTGGAACAATTTTTTTTTTGGTTGCTTGTTTTGT  
TTTTTGCTTTCATTTGCTAGGAGCTGAAACGAAGATTAATGTCATTGGCTTTTTAGAGAGTCTAGATT  
AGTGTGTCTTTGAATGAGGGATATACTTAAATCACCTGAGGATCGTTTACAGCTACAGATGCTGGGGCC  
ACCTGACACAGTCTCTCTGGGGGTGATTCTGCTCTGGAGAACCTCTGGTCTGGATATACCTTTATTGTGA  
CATTGATTTGTATTGTTTTGCTCTACTGACAGGCCTTTTCCAATCCATACAAGCTGAACTTGCTTCCTAA  
TGTTTGTCTAGGCCTTACATGGATAGTAAGGAAGCTTAGGAGACATGTACACAAGGCAGCCCACTTGTAG  
GAAACTGCTTCAGGTGAGGACATCATTCACCAAGTGGATCACCGAGCACCGTGACAGCACCTCAGTCCAC  
GTCTGCAGATTAAGAGCTGAACTCTCACAGAGAAAGTGGAAGTAGAGAAAGGGTTAATTCAAACCTGCTAG  
AAAAGCTAAAAGTAAATTTTAAATGCTGAGCTGCCCATATTCATGCTAGGATGAGAGCCGGCTTAAATG

CTTGCTGGGCATTTTGGTATTTACCACTTAGCATGTTTTCAACTTCTGTGAGGGATTTTCCCCCAATCT  
CCCTAATGTAAACACAGATTTCTCAGCAAGTCATTTCTCAAGCCATGTCATTTCTAGTGTAATAATAATT  
ATAATAATGTGTCA

>NM\_021934.5 Homo sapiens autophagy related 101 (ATG101), transcript variant 1, mRNA

CCGGTCCCGGCTCAGCCTCCGACCCAGGTGGTCTGGAGCCTGCCGGGAGAGTGGTGGCATCTGAGAGGCT  
GGTCGTGGACTGTGGTTGGGGGAGGTGGGAGCTGTTTTAACCGTGTGCCCCCTCTCCTGTGCCGGCGTGG  
GCATCCCCCGGGCAGTGGAACGCGGGCGCTCCTCCAGCTTCCGAGTCCAGCCAGCCTGGGCGCGGGGCG  
CCGCCCCGAGACACCCGAGGAGTCCGTTCTCCTGGTTACGTGGACTGTGGAGCTGGTCTCTTGTGGC  
TCAGCGCCGTGCGGAGGTTGAAGCGTACCTGCGGAGGTGCGACCAGGGCGTGAGGAGGAGGAGGAAGGGC  
ATGAGCCGAGCTTGAGGAATCCGTGCTCCAACTCTACACTCAAGGGTGGCCCTTGGGTAGGGTGAAGAT  
CCCCTGTCTTTATCCTAGTTCCACACCTTGGTGTGGGTACTGGGTGCAGGATGAACTGTCGCTCGGAGG  
TGCTGGAGGTGTCGGTGGAGGGGCGGCAGGTGGAGGAGGCCATGCTGGCTGTGCTGCACACGGTGCTTCT  
GCACCGCAGCACAGGCAAGTTCCACTACAAGAAGGAGGGCACCTACTCCATTGGCACCGTGGGCACCCAG  
GATGTTGACTGTGACTTCATCGACTTCACTTATGTGCGTGTCTTCTGAGGAACTGGATCGTGCCCTGC  
GCAAGGTTGTTGGGGAGTTCAAGGATGCACTGCGCAACTCTGGTGGCGATGGGCTGGGGCAGATGTCCTT  
GGAGTTCTACCAGAAGAAGAAGTCTCGCTGGCCATTCTCAGACGAGTGCATCCCATGGGAAGTGTGGACG  
GTCAAGGTGCATGTGGTAGCCCTGGCCACGGAGCAGGAGCGGCAGATCTGCCGGGAGAAGGTGGGTGAGA  
AACTCTGCGAGAAGATCATCAACATCGTGGAGGTGATGAATCGGCATGAGTACTTGCCCAAGATGCCCAC  
ACAGTCGGAGGTGGATAACGTGTTTGACACAGGCTTGCGGGACGTGCAGCCCTACCTGTACAAGATCTCC  
TTCCAGATCACTGATGCCCTGGGCACCTCAGTCACCACCACCATGCGCAGGCTCATCAAAGACACCCTTG  
CCCTCTGAGCGTCGCTGGATCTCTGGGAGCTCCTTGATGGCTCCCAGACCTTGGCTTTTGGGAATTGCAC  
TTTTGGGCCTTTGGGCTCTGGAACCTGCTCTGGGTCAATTGGTGAGACTTGGAAGGGGCAGCCCCGCTGG

CTTCTTGGTTTTGTGGTTGCCAGCCTCAGGTCATCCTTTAATCTTTGCTGACGGTTCAGTCCTGCCTCT  
ACTGTCTCTCCATAGCCCTGGTGGGGTCCCCCTTCTTTCTCCACTGTACAGAAGAGCCACCACTGGGATG  
GGGAATAAAGTTGAGAACATGAGTTTGGGCTGA

>NM\_004707.4 Homo sapiens autophagy related 12 (ATG12), transcript variant 1, mRNA

GTCTCCAAGCAAGATGGCGGAGGAGCCGCAGTCTGTGTTGCAGCTTCCTACTTCAATTGCTGCTGGAGGG  
GAAGGACTTACGGATGTCTCCCCAGAAACAACCAACCCCGGAGCCCCGTCTCCGCTGCAGTTTCCCCGG  
GAACAGAGGAACCTGCTGGCGACACCAAGAAAAAATTGACATTTTGCTAAAGGCTGTGGGAGACACTCC  
TATTATGAAAACAAAGAAGTGGGCAGTAGAGCGAACACGAACCATCCAAGGACTCATTGACTTCATCAAA  
AAGTTTCTTAACTTGTGGCCTCAGAACAGTTGTTTATTTATGTGAATCAGTCCTTGCTCCTTCCCCAG  
ACCAAGAAGTTGGAACCTCTATGAGTGTTTTGGCAGTGATGGTAACTGGTTTTACATTACTGCAAGTC  
TCAGGCGTGGGGATGAACCACAAAGAAAATCAACTTGCTACTACATGAAATGGATTTTCACGGAAGAGAC  
AGCTCTGAAAAGTTTTGATGCTTGTTGGCAAGAGACTTAACAGATGTGATCTATTTAGTATGTGTCTACTC  
TATGTTTATGCATAAGAAAACATCCATAGCATGAATGGACTCAGAAAAATGTGATTTGTATTAATGCACC  
AGTCATCATAAAAGATGGTCATGATAGTACACCCATTGCTCCTACTTGTTACTATTATTGCTGCAGATCT  
GCCTCCAAGGTTGAAAAGGAGACTAAGACTGTATAAACATCTTCATTGTCAGTTCTCAAAATGACTGAAA  
TTGTTTTCATGGTAAAAGTTAATATACTAAAGGGTTCCTTTTTTTTAAATGTTTACATTTATCTCTATGT  
TTACCTTTTTAGTCACATTGACCTGCTGGCTGAATACCTCAAATAGTCCAGTAGAGGGCAGTCCACCAGG  
CAGAAAAGGTTAGGCGTTTTGGTTTCACATCTTGCTGGGGAATAATAGGGGAAATGGCTGTTTTTGCTA  
ATTTTATGCTAATATCTAGCCAGGAGAGCAAGCACATAGGACAGACTGAAAGACTGTAATTTTACACAAT  
ACACATGGCTTAATTATTTTATTGGGATACAGAAAAATATAAATTCTGGACAAATAAGTCATATACCTGT  
TTTCAGTCCTAACATTTAAGGATTCTTGAGTCCCAATCACATAACTGTGGTGTTACTCTGTCATTTATAT  
GGTGTCAAAAGCACTTGATGAGTAAACCCAGTAGCATCTTTTTGAGTGTTTCATAATGCATTTTCCAAC  
TGAAAACAATAATTGAAAAATAGCCTTATTGTATTTTTATGCCATGACTAAAAGTGCCATTTTACTGA

TGCTATTAGACTGATAATTTCTTGAAGTGAAATTTAACCTTTTTTCTCTTTAGTATTATGTTTATAATG  
CCATATTTTTAGAAAGCATTCCAGATCAGGCATGGTGGCTTACACCTGTAATCCCAGCACTTTGGAAGGC  
TGAGGTGTGGGGATTGCGTGAAGCCACAAGTTTGAGACCAGCCTGGTTAGCAAGGCAAGATCCCCAACTC  
TACAAAAAATAAAAAATAAAAAAAATTATTAGGCTGCAGAGGCAAGAGGATCCCCTGAGCCCAGAAGT  
TCAAGGGTATAGTGAGTCGTGATTGTACCACTGCATTCCTGCTGAGCAACAGAGTGAGACCCCATCTCAA  
AAAAGAAAAAAAAGGCATTCTAGTAAATCGAATGTAATGTGAATGGAATTTCAAAACAGGATCTAAGAT  
GGTATGTAGTAGAATTCAAAGTAATATCATTTTAAAGTTAAATGAGTATGGAAAAGGTCTGTTCTCTAGT  
TTTGTCCAGTTCAGTTTACTGAAGGAATATATTTAATTATATTCATATATTTAACAAATAAAAAATATGTT  
GAATTTTCGTATTGTTTGCCACTGAGGGTTCAGATGATAGACCTCAAAAAATCGAAAATACTGGTTGAAA  
TTTGTAGCATCCATTTAGTTATTCTTTTTGACCTAAATAACTTAATAGTTTATTAAATCTAAGGTTAGCT  
AAATATGTAGCTAACCTTATTTGTTTTCTTCCTAACAACTCTGAAGAATACATAGGACTTTGCACTTTT  
TTTTTTTTTTTTTTTTTAAAGAGACAGCGTTTCGGTCTTGTTGCCCAGGCTGGACTGTAATGGCACAA  
TCTTGGCTCATTGCAACCTCTACCTCCCGGGTTCAAGTGATTCTCCTGCCTCAGCCTCCTGAGTAGCTGG  
GATTACAGGCACCTGCCACCACACCCGCCTAATTTTTGTTATTTTGTAGTGGAGACAGGGTTTTACCATT  
TTGGCCAGGCTGGTCTCAAACCTCTGACTGACCTCAGGTGATCCACCCGCCTTGGCCTCCCAAAGTGCTG  
GGATTATAGGTGTGAGCCACCGTGCCGGGCCTGGACTTTGTACTTTTTCAAATCATATTTAATTATTTCT  
TGATCTTTACTCAAAGAATTATTCTGCGCTAAATTTGCAACATTAAACAATAATTAAGCCTGGATCCGAT  
AAGTTATTGGGTGACTAGAACCTACAACACAATTTATTTTAAATTTAACTCTCAAGTCTGATTAACTT  
GGGGGAAAAACTGAACATTCAGGTGATATTTTAAATTTCTTTGTGACTAAATAGATGTCATTAATATCA  
TGCTTCATCTTACTGTGCATAGATGACCCATGGCACACAAAGTATATGTATAATATTGCAATATTGTACT  
TCCATCTTTAAAAGTATGCCAAAGACTTCATAATGAATTCACCATATTTAAGGAATAAGGCAAATTAATG  
TTTATCCGAAATCAAAATGAGATTGGATAATTCCTGGAATCTGATTTCTGTAAGTTTCAGTCCTAAAGGG  
ACCTTAAATATCTACTAGAACGAAGTACAGTGTATTTCTCAGATTACATGACATTAGTCAACCAATTTAG  
TTGTAACACAAAGTGAGAAAGCCTTAGGTGTTGAAGGAGTGTGAAAATAAAAATCTCTTTTCATGCAGTT  
TCTGCTTCATTTCCAAGGATTATAATATGCTGAGTAACTTTTGGCACTAAGGAAGCCAGCTACAGGCC

ACGTAATGAAACTATTTCAGAAAACAGTTCAGCAAATACTACTATTTGAATACAGTTCAAATCGTATTTA  
TATAAACTACTCTGCCTACATTATTTAACCCAACTGGATTATTCACCATTCTTTGAAGATGCCTTGTGTT  
TTCTGTTATCTACTTCTGCTCGTGCAGTTTACTTACACCTTCACCCTTCAAATCCTAACTCTTCTCAA  
GGCCTGATTAGATTCTTAACCTTTTTAAAGGCTATCTGAATCATTCAAGGAGAAGATACCCTTCTCTCAT  
AAAAACACTTAGAGCAAACCTACCACTATTAAATCACTTATTGCATACTGCCTCAGAGCCATGTGTCCAGT  
TATTCTGGTTTTTATCTGGTACCCACACACACATAATACTTAGTACATTTCTTATATGTAAATAATTAG  
TAATGTAACACATCGAGTGAATGAAATTGTGATTAGCAAAGTATGACAGCTAAAAACAAAGGAAATTTTG  
TATAGTTTAAGTTTTGTACAGCAGAAGGTAATGGAAAATATTTGCAACATATGACAGTGTTTTAAATGT  
CTTAAGTATATGAAGAATTTGTTTCAATTGGTAAGAAAAGACCAACTGAAAAATAGGCAAAACATACCAA  
ATTTGATTACAAAAAGATACAAATGGCCAACAAAACATGAAACACCTTGAACCCATTGGTTACAAAA  
AATACAAATAAAAAACAATGCTGACTGACAATAAAAAATAATGTACATCTTGCTATTAGCAGAGTTGTGGGG  
AAATCCTGTCATATTTTGGTGAATAGAATATGAGTTGGTATATCACTTTTAGGGGGCCATTTGGCAATAT  
CAAAAACCTTGAAACGTAAGTATAAACTTCAGTTTGTTGCTATAACCTGTCATTACATATTGAGTGCCT  
ACTATGTCCTAAATATTGGAATAACACTAATAAAGCTCATAAGAGACTAA

>NM\_014741.5 Homo sapiens autophagy related 13 (ATG13), transcript variant 2, mRNA

GGCCATTACCGAAGCGGATGAAAACAAACACTAACGATGGCGGCGCCGGGAAGCGACCGGCTGCTGGGCT  
TAAGGCGGGAGTGACCGCTTAACCACTGAGGGAAGCACTGAAGAGCGCCAGTCGACGTGGGTGCGACAAC  
TCGCGGAGTCTTAGGAGCAAAACGTCTGGGGCCTGCGAGCCAGGACCCTTCTGAAGCCTTAGGTGTCTAT  
CGGCGACGTGTACGGTCACTGCAGCTCCGGAGCGCGGAACCCTCAGCCAGGAGGCGCGGCTGGTCGGTCC  
CAGGTCCCGGCCTCCGTAATGAGAGCCCGGAACCACTCTTTGTGCCGAGCTTCGCAGCATCTTGGACTION  
AAGTGATTCTCCTGCCTCAGCCTCCTGAGTAGCTGGGACTACAGATTCCTATAGGCAATGGAACTGATC  
TCAATCCCAGGACAGAAAGGACCTGGACAAGTTTATTAAATTTTTGCCCTCAAGACTGTCCAAGTGAT

TGTCAGGCTCGGCTTGGTGAAAAGATTTGCACTCGTTCATCATCTTCTCCAACGGGTTGAGATTGGTTC  
AACTTAGCAATCAAAGACATCCCAGAGGTTACACATGAAGCAAAGAAGGCACTGGCAGGACAGCTGCCTG  
CAGTCGGGAGGTCCATGTGTGTGGAGATTTCACTTAAGACTTCTGAGGGAGATTCCATGGAGCTGGAAAT  
ATGGTGTCTTGAAATGAATGAAAAGTGTGATAAAGAAATCAAAGTTTCTACACGGTGTACAACAGACTG  
TCATTGCTGCTGAAGTCCCTTCTTGCTATAACTAGGGTGACACCAGCCTATAGGCTCTCCAGGAAACAAG  
GGCATGAATATGTCATATTATACAGGATATATTTTGGAGAAGTTCAGCTGAGTGGCTTAGGAGAAGGCTT  
CCAGACAGTTCGTGTTGGGACAGTGGGCACCCCTGTGGGCACCATCACTCTTTCTGTGCTTACAGAATT  
AACTTGGCATTTCATGTCTACCAGGCAATTTGAGAGGACCCACCTATCATGGGGATTATTATTGATCACT  
TTGTGGACCGTCCCTATCCCAGCTCCTCTCCCATGCACCCCTGCAATTACAGAACTGCTGGTGAGGACAC  
TGGAGTAATATACCCGTCTGTAGAAGACTCTCAAGAAGTGTGTACCACCTCTTTTTCCACCTCCCCACCA  
TCCCAGCTGATGGTTCCTGGGAAGGAAGGTGGGGTACCCCTTGCTCCCAACCAGCCTGTCCATGGTACCC  
AGGCTGACCAGGAGAGACTGGCAACCTGCACCCCTTCTGACAGAACCCACTGTGCTGCCACACCCTCCAG  
TAGTGAGGATACTGAAACCGTATCAAACAGCAGTGAGGGACGGGCCTCCCCTCACGATGTCTTGAGACC  
ATCTTTGTCCGAAAAGTGGGGGCTTTTGTCAACAAACCCATTAACCAGGTGACCCTGACGAGTTTGGATA  
TACCCTTTGCCATGTTTGCTCCCAAGAATTTGGAGCTGGAGGATACCGATCCAATGGTGAATCCTCCAGA  
TTCCCCAGAGACTGAATCTCCTCTCCAGGGCAGCCTGCACTCAGATGGCTCCAGCGGGGGCAGCAGTGGC  
AATACCCATGATGACTTTGTTATGATAGACTTTAAACCAGCTTTTTCTAAAGATGACATTCTTCCGATGG  
ACCTGGGGACCTTCTATCGGGAGTTTCAGAACCCACCTCAGCTGAGCAGCCTCTCCATAGATATTGGAGC  
ACAGTCCATGGCTGAAGACTTGGACTCATTACCAGAGAAGCTGGCTGTGCATGAGAAGAATGTCCGCGAG  
TTTGATGCCTTTGTGGAAACCCTGCAGTAAAAGTATCCTTGAGTCCCAGCAGCACCCCTTTTTGTGGCC  
CCAGGGCATAAGCAGCCTCCCATGCATCAGCTGCTCCCACCCCTCATCCTGCTCTGAGCCAGGTGGAAGG  
GAGGCTGGCTTCTCCCATGGGGACCCAGAAGTCCCTACTCTTGACCTCCTGGAGACTCCGTGGCGGCAG  
TCAAGCCCAGTGCCAGTTGGAGAAGACTCACGTGCTGGCCTTGGAGATGGGAAGAACCTTCGTACGAAA  
AAGCCCTCAGCAGGGCCATCTGTGTGCCCTGCCCATCACCAACTGCTTCCCAAGGGTGTATCCTGTTCC  
TCCTGCTGCCGGCCTCCTGCCTGGGCCTGCCTTGACGCTGGCCCCCTCCTGCCTGCTGTACCATCCAC

TGTTTGACATTCCAGCTGGTGGCCAAGAGATTGGTGTGGAGGCAGAAAGAGGAAGGAGACAGTGCCAGGA  
GGAAGAAGGAAGGAGTCCCTTAGCTCTCTTCATTGTCCCCTTACTTCTGCTATCTTCTCTCTCTTC  
TTCTCTCTCTTGCCTCTATGCCTGTATTTCTGGCAATATGACAGGCCTGCCTACCCAAGATCAGAACTCC  
AAAACCACTCCCACCCCTGAAGGTCGGGAGGGTCTGAGCAGCCCTGGTGGCTGCCTGTGCTCAGGTCCTC  
AGCTCCATGGGAAATAAAAATGGCACCTGAATCTCTAGGATTTTGTCACTTGGAGTCACAGCAAAGTTC  
TCTTCTCTTGTCCCCCGTTGCTGCTCCTTGGTTATAGAACATGGTAAATATTTATTACTTTCAGAGAA  
ACCAGATATTTTATAGAGGAAATATGTTTGAGGTGAGTTGTTTTTCACTTGGAGAAGGCGGAGGGCTCTT  
CCTGGGACGGAGACCTCCTCCTCCGGAGGTTATTGAGAATCCGGGCTGCTGCTTTGAGGATCTTCCCACC  
ATACAGACAGCGAGATCCAAGAAGAGGGCTGGCCGGGGGCAAAGTCACCTCCCAGTGTGGCTGCACTGGA  
ACTGACTAAAGGCTTTACCTTGGATAGTTGCGTATTCCTGGTGAGAGCCTTACATCTCCACAGTTTCTG  
CAGAGTGACTGACTCCATTCTGGCAGCCCAGGAAGTCTGGGTGCTAAATGTGATGGCCACATGTAGTGG  
TTAGGGGATGTTGTGTGTGTGTCCCCAACTGCCTGGGTACTTGTTCTGATCCCTGGGGCTGTCCTGTGGA  
GCTTTTCTCTGCTTGGGCCTAGCTACCATCTCCCTCTAATCCCAGGTTCTCTACACTGCCCTGGGGTT  
TACCAGCTGGATTGGCTTCTGGTTGAGAAATCAAAGCTGGGCGTATGATTGACTTAACCTTCAGGTATT  
GTTACTTGAATAAGTCAAGTGCCTAGCCTCACCCACCTATGATCTGTCCTTTCCCAGCCTCGCTGGTAGT  
CCTGGTCAAGGAGATCTAGGTCTACTCCATTCTCCTGGCCACCTGGGGCATTCACTGGCAGCAGCTGT  
GCTTCAGTGGAGCAGGTGGTTCTCAGCTGCTTGTTAGTATACTGCATGTGACACTGTTCCACATACAAG  
GCTGACTTCTGAGGATTGGAGCAGGCTCTGGCGGGGACCAGAGCTCTGCGTGCTGCTGCTGCCACCAAGA  
AGTGTTAGCAGAAGCAGTAGCAGCCAACTGGCCCTCCTGACTTTGGCCAGAGCACATGCGTGGCTTGCT  
GAACCCAGGCTCAGGTTTATCCCCAAGGCCCCAGCTTTGAGAAGGGGGAAGGCCCTGGTAAGTTATTGA  
TGCCCCCATATTTAGCTACTGCTCTCTTTCCAAGGCCTTGCATGGAAAGGCCTAGCCATTGTCTGAGGC  
AGCAATCTTTGGCATCTACAGGTGGCAGCAGCCTTTCACCAGGGCTCCATCTGTGAAGAGTCTCAGCCAT  
GACTTTGAGCTGAGCTTGGGAGAAGTAAAGCAACTGTTAAGGCCAGCCCTTGCCCCTCAGACCTGCCATG  
AAAGGAATGAGCCCTAGACTGACTCCTGCAGCACCCCCGGGACAGGCTGGGACCAGCTGTTTGTCTCCAG  
GTGTCAGAGTCCCTCCTCCTCCAACCTCTCCAACCTACTTTGTTTGGAATAACCGAGCTACACTTCA

AAATGTATTCAAGGGATTTC AATAAAATTTTTTCTGTACTTTA

>NM\_014924.5 Homo sapiens autophagy related 14 (ATG14), mRNA

AGGCCATCATGGCGTCTCCAGTGGGAAGGGAGCCCGGGCGCTGGAGGCTCCTGGCTGCGGGCCCCGGCC  
GCTCGCCCGGGACCTGGTGGACTCCGTGGACGATGCGGAGGGGCTGTACGTGGCTGTGGAGCGCTGCCCC  
CTGTGCAACACTACCCGCCGGCGGCTGACCTGCGCCAAATGCGTTCAGAGCGGCGATTTCTGTCTACTTCG  
ACGGCCGCGACCGGGAGAGGTTTATCGACAAGAAGGAAAGGTTAAGCCGACTTAAGAGCAAGCAAGAAGA  
ATTTCAGAAAGAAGTGTTAAAAGCTATGGAAGGAAAATGGATAACAGATCAGTTGAGATGGAAAATAATG  
TCCTGCAAGATGAGGATTGAACAGTTAAACAAACAATATGTAAAGGAAATGAAGAAATGGAGAAAAATT  
CTGAAGGCCTTCTCAAAACCAAGGAAAAGAATCAGAAGCTTTACAGTCGAGCACAACGGCACCAAGAGAA  
AAAGGAGAAGATTCAGAGGCATAATCGCAAACCTGGTGACCTGGTAGAAAAAAGACCATTGACTTAAGA  
AGTCATTATGAGCGTCTGGCAAATCTTCGACGATCCCATATATTAGAGCTCACCTCTGTCATTTTTCCAA  
TCGAGGAAGTAAAGACGGGTGTGAGAGACCCCGCAGATGTGTCTTCAGAGAGTGACAGTGCCATGACCTC  
CAGCACTGTGAGCAAGCTTGCTGAAGCCCGGAGGACAACCTACCTCTCAGGACGATGGGTCTGTGACGAT  
CACAACGGAGACACCAGCATTAGCATTACAGGGCCTTGGATTAGCCTCCCTAACAAATGGGGACTACTCTG  
CCTACTACAGCTGGGTGGAGGAGAAGAAAACAACCCAGGGGCCTGACATGGAGCAGAGTAACCCTGCCTA  
CACCATCAGTGCTGCGCTGTGCTATGCAACTCAGCTGGTCAACATTCTGTCTCATATACTTGATGTAAAT  
CTTCCCAAAAAGCTCTGCAACAGTGAATTTTGTGGCGAAAATCTAAGCAAGCAGAAATTTACTCGAGCAG  
TGAAGAAACTGAATGCAAATATTCTTTACCTTTGTTTTTCTCAGCATGTAAATTTAGATCAATTACAACC  
ACTGCATACCCTCAGGAATCTAATGTACCTGGTCAGTCCAAGCTCTGAACACCTAGGCAGGTCAGGGCCC  
TTTGAAGTACGAGCAGACCTTGAGGAGTCCATGGAATTTGTGGATCCCGGAGTTGCTGGAGAATCAGATG  
AGAGCGGAGATGAGCGCGTCAGCGATGAAGAAACCGACCTGGGCACAGACTGGGAGAACTTGCTAGTCC  
CCGGTTTTGTGATATCCCTTCCAGTCTGTGGAAGTCTCCAGAGTCAGAGCACCCAGGCGTCCCCACCC

ATCGCGAGCAGCAGTGCAGGTGGGATGATCTCCTCTGCAGCAGCCTCGGTGACCTCCTGGTTAAAGCTT  
ACACTGGACACCGTTAACGAGCATGGACCAAAACATACCAAATCTGCATCAAGAAAGTTCTTCTCCCACT  
ACACTCTAGTAAACATTTTCTGTTTAAAGTTAAGATAGTGTCTGGAACAAAGAGGTTAAAGTGTTGTTTTG  
TTTTGTCTTTTTAAGCAGGGAGACAAACATTTCTATTTGCCAAGTGGCCTGTGATGGTGACCAACATGCT  
TATGATAATTAAGAGAACAGGGGTGGAAGGTCTTTCTACCCAGACCAGTGCTGGTGGAAGGAGGACCTGT  
GCGTGTGGCCAGTTCTGCCAAGGAAGCAGTTGATTTGGGTTCCCTCTGGGCCCCGGGCCACCGGGCCCACA  
GATATGGGTCAGTGTGCTGGTCCTTGCGGTGCTGAGACTGTTCTGACACTTTAAGTTTTAGAGGTTGGT  
TGAATCACAAGAGGTGATTCTTGATTATTAGGACATGAAAGATAAAAGCTCTTTAATAAGAGTTTTTCTG  
CCATTGTTTTTTGTATGAGAACCAGCAGGCAATTTAAATTTCTAATTTGGTCCTTTGATTTTGTTGGG  
AGGGGTGAGTTACACGTATTTTATTCATGCTGCTCTGTCGTAGTTTGTGAGACATTCTGTTTTCTTTC  
CCCCACACACCAAAGAAAATGAAAGTCTTTTTCTTTAGGACCCACATCCATAAATGGAAGAAATCCTGGC  
TGCAATAATGTCTAGAGAGTTTTTAACTATTTTCTGTATTCTGAGGGGAATTAAGCTTATTCTTACCTA  
GTTGAATTCCTGCCATCCACACTATGAGCATTTTGAAATTGAACTTATATTTTCTGGGTGAAAATAAGTC  
ATGAAGGTCATTCCCTTATGTAAGCTCAATGCCTGCCTGGGCACAGGGGAAAAGCCACTTAGTTAAGTGG  
CCTCTGGTCATTCTTGTTGGTGTCCACTTTCTTTCTATGGGATTGAGTAGGTGGCAGGTGTTTTCAGGGGA  
AACCATCCTACTTGTTTCCCCGAACCTTTGTTGCTCTGAGGACACAGCTTTGCTCAGAAATGCAGCGCA  
GATCCTTACGGCTGATGCTACTCTGCTCTGTTCTGGGGAAAGCACAATATAAAGAAAGAATTTCCCAGCC  
AGGCGCAGTGGCTCACGCCTGTAATCCCAGCACTTTAGGAGGCCGAGGCAGGCGGATCACTTGAGGTCAG  
GAGTTTGAGAGCAGCCTGGCTAACATGGTGAAACCCTGTTTCTACTAAAAATACAAAAAATTACCGGGTG  
TGGTGGCGCACGCCTGTAATCCCAGCTACTCGGGAGGCTGCGGCAGGAGAATCGCTTGAACCGGGAGGCA  
GAGGTTGCAGTGAGCCGAGATTGTGCCATTGCACTCCAGCCTGGGCAACAAGAGCGAAACTCCGTCTCAA  
AAAAAAAAAGAATTTCCCTCAGCAGGAGATCATTTTCAGCTCACGTGTCTTGTCATTCTTTTAGTGACAA  
TCTTACAAGAAAACCTATAATGAGAGAGGCATTATGTACAAATATGTAAGTAGTTTATTTTAAATAACTGC  
AAAAAATCCTATGTAACAACTACCAAAAGAAATCCTATGAAAGAGTCCTAACAGGCATTATTACCATAT  
CTTATGTGATTGGCATGATAGCACCTCTGATAAATCATTCAGAGGTTTGCCATGCCCCAGCTTCTTTTCT

CATCATAATAATTGTAGTTGATACTTTGCCTCCAAGTCCGAGGTGCTATATAGCTTTTGCTAATGGTATA  
TTTGGTGTTTTGTATAGTTTTGGGTAGAGTTGCAGAACGGAGTTTATTTCTATCCGGTAGTCACAAATTC  
CTTGGCTCTATGAATTTTCCATGAAAGGAGGAAGTAGGCTTTTCTCGTTGTGGGTGGTCTTTTTTTTTT  
TGGAGACGGAGTCTCACTCAGCTGCCCAGGCTGGAGTGTAGTGGCACCATCTCCGCTCACTGCAACCACC  
ATCTCCTGGGTCAAGCAATTCTTCCATCTCAACCTCCCAGTAGCTGGGATTATAGGCACCTGCCATCA  
TGCCCAGCTAATTTTTGTATTTTAGTAAAGACGGGGGTTTTACCATGTTGGCCAGGCTGGTCTTGAAC  
CCTGACTTCAGGTGATCCGCTTGCCTTGGCCTCCTAAAGTGCTAGGATTACAGGCCTGAGCCACCGCGCC  
CGGCCCCTTATGGGTCTTCTACACTGCTGGGATCTCTGTTTTAAGTGCTCAGCTTCATGATTGATTGCT  
GGGCTTCCATTTTCCCATCCAGTTCTGGAGTTCGTAGAGAGTGAAGATGGTAGACTTGAACAGATAAATA  
AACTTAACGATCTTGTAAAGAGTTGTCTAGCTACTTAAACCTCAGAAGTAAGAGCTTAGTCTCACGAGT  
TGTAAGAGTGGGATTTGGAGCTTGGTGGTGGAGACTGACTTCAGCTGAGAGATGCACAACAGTCATGGTT  
TTCTTAAGCCTCTTATGAAACCATGAATGAGAGATGAAGCTAAAGAATAGAATCCAGAGATCACAACTC  
ATCTAGAGTACTTCCACAAAATTTACAAAGATGTGGGAACTTTATGGATAGGATATATTTTGTGTTGT  
TGTTAATATCAACTAGAGGCACTTTACATAGGGTTAAGTGATCGAACCCTTTTGTGGTTTTGAACACCAA  
CATACTGGCTTACACTGCTGAAATATTTTGGGTTTCATTATTTGCACTGGATCCACCCTGTAAATACTC  
TTAAGTATACATTTCAACCACTGTTTTTCTACTCTTTTGTCTGCTCATTAAATCTTTCATGTAGGTGC  
CAGAACCATATGTAAACAGCTTTTTAAAAAATTGAAGCTGGTATTTTGTAAACAAAAAGCCATAGAAC  
TTGGTCATGTTTTCCATTTTAAAATGATTTACTGAAACAAAGTAATACTAATAAAAAACCCACAGGCACCA  
AACAGGCTGCTTAAATGGTCTGTAAAGACATTTTTTGGTTATGGAATATAAGAAAAGTTTTGCACATC  
TGTAAGGGGGAAAAACAGTATATCACCATTGGGTAGAGTGGACGGGACTCATGTAAGGACTCAATTTGGG  
GAAGAGCATTCAGTGGCATGCTGTTAGAGGACTAGTGCCGAGAATCTCCTCACAGTATCATGTTGCAGG  
AATCCCCATTGCTCTGCAACTTCAAACCAGTTTGAGTCATACAAATGTTTTCTAACTTTTATTGTAT  
TACTGCAATAAATCTTTTAACAGTA

>NM\_017974.4 Homo sapiens autophagy related 16 like 1 (ATG16L1), transcript variant 2, mRNA  
AGACCGTCCCGGATGGCCTCGGGGACTGCCAGTGTGTGGAGGTGAGCTCCGGGATTGCCGGCATTCCCGC  
TTCTGCTGGTTGCTTCATGCTGCAGGCTGCGGCCGTGAGCCCTCGCTCGCATTGGTGGCGCTGAGGTGCC  
GGGGCAGCAAGTGACATGTCGTCGGGCCTCCGCGCCGCTGACTTCCCCCGCTGGAAGCGCCACATCTCGG  
AGCAACTGAGGCGCCGGGACCGGCTGCAGAGACAGGCGTTCGAGGAGATCATCCTGCAGTATAACAAATT  
GCTGGAAAAGTCAGATCTTCATTAGTGTGGCCAGAACTACAGGCTGAAAAGCATGACGTACCAAAC  
AGGCACGAGATAAGTCCCGGACATGATGGCACATGGAATGACAATCAGCTACAAGAAATGGCCCAACTGA  
GGATTAAGCACCAAGAGGAACTGACTGAATTACACAAGAAACGTGGGGAGTTAGCTCAACTGGTGATTGA  
CCTGAATAACCAAATGCAGCGGAAGGACAGGGAGATGCAGATGAATGAAGCAAAAATTGCAGAATGTTTG  
CAGACTATCTCTGACCTGGAGACGGAGTGCCTAGACCTGCGCACTAAGCTTTGTGACCTTGAAAGAGCCA  
ACCAGACCCTGAAGGATGAATATGATGCCCTGCAGATCACTTTTACTGCCTTGGAGGGAAAACTGAGGAA  
AACTACGGAAGAGAACCAGGAGCTGGTCACCAGATGGATGGCTGAGAAAGCCAGGAAGCCAATCGGCTT  
AATGCAGAGAATGAAAAAGACTCCAGGAGGCGGCAAGCCCGGCTGCAGAAAGAGCTTGCAGAAGCAGCAA  
AGGAACCTCTACCAGTCGAACAGGATGATGACATTGAGGTCAATTGTGGATGAACTTCTGATCACACAGA  
AGAGACCTCTCCTGTGCGAGCCATCAGCAGAGCAGCCACGAGACGCTCTGTCTCTTCTCCAGTCCCC  
CAGGACAATGTGGATACTCATCCTGGTTCTGGTAAAGAAGTGAGGGTACCAGCTACTGCCTTGTGTGTCT  
TCGATGCACATGATGGGGAAGTCAACGCTGTGCAGTTCAGTCCAGGTTCCCGGTTACTGGCCACTGGAGG  
CATGGACCGCAGGGTTAAGCTTTGGGAAGTATTTGGAGAAAAATGTGAGTTCAAGGGTTCCTATCTGGC  
AGTAATGCAGGAATTACAAGCATTGAATTTGATAGTGTGGATCTTACCTCTTAGCAGCTTCAAATGATT  
TTGCAAGCCGAATCTGGACTGTGGATGATTATCGATTACGGCACACACTCACGGGACACAGTGGGAAAGT  
GCTGTCTGCTAAGTTCCTGCTGGACAATGCGCGGATTGTCTCAGGAAGTCACGACCGGACTCTCAAATC  
TGGGATCTACGCAGCAAAGTCTGCATAAAGACAGTGTTTGCAGGATCCAGTTGCAATGATATTGTCTGCA  
CAGAGCAATGTGTAATGAGTGGACATTTTGACAAGAAAAATTCGTTTCTGGGACATTCGATCAGAGAGCAT  
AGTTCGAGAGATGGAGCTGTTGGGAAAGATTACTGCCCTGGACTTAAACCCAGAAAGGACTGAGCTCCTG

AGCTGCTCCCGTGATGACTTGCTAAAAGTTATTGATCTCCGAACAAATGCTATCAAGCAGACATTCAGTG  
CACCTGGGTTC AAGTGCGGCTCTGACTGGACCAGAGTTGTCTTCAGCCCTGATGGCAGTTACGTGGCGGC  
AGGCTCTGCTGAGGGCTCTCTGTATATCTGGAGTGTGCTCACAGGGAAAGTGAAAAAGGTTCTTCAAAG  
CAGCACAGCTCATCCATCAATGCGGTGGCGTGGTCGCCCTCTGGCTCGCACGTTGTCAGTGTGGACAAAG  
GATGCAAAGCTGTGCTGTGGGCACAGTACTGACGGGGCTCTCAGGGCTGGGAGGACCCCACTGCCCTCCT  
CAGAAGAAGCACATGGGCTCCTGCAGCCCTGTCCTGGCAGGTGATGTGCTGGGTATAGCATGGACCTCCC  
AGAGAAGCTCAAGCTATGTGGCACTGTAGCTTTGCCGTGAATGGGATTTCTGAAGATTTGACTGAGGTCT  
CTCTTGGCCTGGAAGAATAACACTGAAAAACCTGACGCTGCGGTCACTTAGCAGAGGCTCAGGTTCTTG  
CCTTGGGAAACACTACTAGCTCTGACCTTCCATACCTCACTTGGGGGAGCACAGGGCCCCGCTGGGCCTC  
CTCACCAACGGCAGTGCCAAAATCAGCCCCACATCAAGGTGGTGTCTCTGTGCTTTCTCTCGTCTTC  
CAAAGTCGGTTCTGGCCTAACGCATGTCCCAACACCTTGGGTTCATTTGCCCGGTGAACTCACTTTAAGC  
ATTGGATTAACGGAACTCCCGAACTACAGACCCCTCCCTGGTGGGTTCATGAATGTGTCTCATTACTG  
CTGAAATGTCCTCACATCTCTTTCACTGTTCTTCAGAGCTTTCTGGCTCTCTTTCCCCACAAAATTCGA  
CATATTTAAAAATCTCCGTGTGGCTTTAAAAAATGGTTTTTTGTTTTTTGTTTTTTGAGGTGGGAGAG  
GATGTGTGAAAATCTTTTCAGGGAAATGGGTTCGCTGCAGAGGTAAGGATGTGTTCTGTATCGATCTG  
CAGACACCCAGAAGGTGGGTGCACACTGCATGCTTGGGGGTGCCAAGGGATTCGAGACCTCCAACATACT  
TGTCTGAAGGTGGTGATTCTGGCCATGGCCCCCTTGCCAAGCCTGTGTGCGATGCCCTTGGTGCTTTAGT  
GCAAGAAGCCTAGGCTCAGAAGCACAGCAGCGCCATCTTCCGTTTCAGGGGTGTGATGAAGGCCAAGG  
AAAAACATTTATCTTTACTATTTTACCTACGTATAAAGTTTTAGTTCATTGGGTGTGCGAAACACCCCTT  
TTATCACTTTTAAATTTGCACTTTATTTTTTTCTTCCATGCTTGTCTCTGGACATTTGGGGATGTGAG  
TGTTAGAGCTGGTGAGAGAGGAGTCAGGTGGCCTTCCACCGATGGTCCTGGCCTCCACCTGCCCTCTCT  
TCCCTGCCTGATCACCGCTTTCCAATTTGCCCTTCAGAGAACTTAAGTCAAGGAGAGTTGAAATTCACAG  
GCCAGGGCACATCTTTTATTTATTTTATTATGTTGGCCAACAGAACTTGATTGTAAATAATAATAAAGAA  
ATCTGTTATATACTTTTCAA

>NM\_033388.2 Homo sapiens autophagy related 16 like 2 (ATG16L2), transcript variant 1, mRNA

GGGAGGAACGCGCCGCTAGGCGGGAGAGCGCGGCCATGGCGGGGCCGGGCGTCCCCGGTGCCCCGCAGC  
GCGCTGGAAACGCCACATCGTGCGGCAGCTGCGGCTTCGGGACCGTACGCAAAGGCGCTTTTCCTGGAG  
CTGGTGCCGGCCTATAACCATCTCTTAGAGAAGGCTGAGCTGCTGGACAAGTTCTCAAAGAAGCTGCAGC  
CGGAGCCAAACAGTGCTACTCCCACCACCCACCAGGGCCCCTGGGAGGAGTCAGAGCTTGACTCAGACCA  
AGTCCCATCACTGGTCGCACTGAGGGTGAAGTGGCAGGAGGAGGAGGAGGGGGCTCCGGCTGGTCTGTGGT  
GAGATGGCCTACCAGGTGGTGGAGAAGGGCGCGGCCCTGGGCACGCTGGAGTCGGAGCTGCAGCAGAGGC  
AAAGCAGGCTGGCAGCCCTGGAGGGCCGCGTGGCGCAGCTGCGAGAGGCGCGGGCGCAGCAGGCCAGCA  
GGTGGAGGAGTGGCGGGCGCAGAATGCGGTGCAGCGGGCAGCCTACGAGGCGCTGCGCGCGCACGTCTGGG  
CTCCGGGAGGCGGCACTGCGCAGGCTCCAGGAAGAGGCGCGCGACCTGCTGGAGAGGCTCGTGCAGCGCA  
AGGCGCGCGCCGCGGCCGAGCGCAACCTGCGCAACGAGCGCCGGGAGCGGGCCAAGCAGGCGCGGGTGTC  
CCAGGAGCTGAAGAAGGCTGCCAAGCGGACCGTGAGCATCAGCGAGGGCCCGGACACCCTAGGCGATGGG  
ATGAGGGAGAGAAGGGAGACTCTGGCTCTGGCCCCTGAGCCAGAGCCCCTGGAGAAGGAAGCTTGTGAGA  
AGTGGAAGAGGCCCTTCAGGTCTGCCTCAGCCACCTCCCTGACGCTGTCCACTGTGTGGATGTGGTGAA  
GGGGCTTCTGGATTTTAAGAAGAGGAGAGGTCACTCAATTGGGGGAGCCCCTGAGCAGCGATACCAGATC  
ATCCCTGTGTGTGTGGCTGCCCAGCTTCTACCCGGGCTCAGGATGTGCTGGATGCCACCTCTCTGAGG  
TCAATGCTGTTCTGTTTTGGCCCCAACAGCAGCCTCCTGGCCACTGGAGGGGCTGACCGCCTGATCCACCT  
CTGGAATGTTGTGGGAAGTCGCCTGGAGGCCAACCAGACCCTGGAGGGAGCTGGTGGCAGCATCACCAGT  
GTGGACTTTGACCCCTCGGGCTACCAGGTTTTAGCAGCAACTTACAACCAGGCTGCCAGCTCTGGAAGG  
TGGGGGAGGCACAGTCCAAGGAGACACTGTCTGGACACAAGGATAAGGTGACAGCTGCCAAATTCAAGCT  
AACGAGGCACCAGGCAGTGACTGGGAGCCGCGACCGGACAGTGAAGGAGTGGGACCTCGGCCGTGCCTAT  
TGCTCCAGGACCATCAATGTCCTTTCCTACTGTAATGACGTGGTGTGTGGGGACCATATCATCATTAGTG  
GCCACAATGACCAGAAGATCCGGTTCTGGGACAGCAGGGGGCCCCACTGCACCCAGGTCATCCCTGTGCA

GGGCCGGGTACCTCCCTGAGCCTCAGCCACGACCAACTGCACCTGCTCAGCTGTTCCCGAGACAACACA  
CTCAAGGTCATCGACCTGCGTGTGAGCAACATCCGCCAGGTGTTACAGGGCCGATGGCTTCAAGTGTGGTT  
CTGACTGGACCAAAGCTGTGTTAGCCCCGGACAGAAGCTATGCACTGGCAGGCTCCTGTGATGGGGCCCT  
TTACATCTGGGATGTGGACACCGGGAACTGGAGAGCAGACTACAGGGACCCCATTCGCGCTGCCGTCAAC  
GCCGTGGCCTGGTGCTACTCCGGGAGCCACATGGTGAGCGTGGACCAGGGCAGGAAGGTTGTGCTCTGGC  
AGTAGGGCCACGACCTGCCTGCCTGGGCTGGAGCTCTTGCCCGAAGCCTGAAGCTTCCTTCGGCGCCATG  
CAGGGGTTGGGGTTGGGACTGGAGCTGGCCTTGGGATTTAATGGGGAAGAAGGCCTGGCAGGACCTGGCC  
TGTTTGTTTAAAAATGAAGTATGGGTTGGGGGATTACGCTAGTTTTCTTTGTATTTTATCTCTATCTC  
CTCACTTTTTCTCCCAAAGTAGAAAAAATGATATCTGAA

>NM\_015104.3 Homo sapiens autophagy related 2A (ATG2A), transcript variant 1, mRNA

AGTGAACAGCGGAGCCGGACGGGGATCGCCGGCGGGCGGCAAGCGGAGGCGGCCAGGCCCGGGCGGTCTC  
CGAGATGTCACGATGGCTGTGGCCATGGTCAAACGTGTGTGAAAGAGCGGGTCTGCCGCTACTTGCTGCAC  
CACTACTTAGGTCACCTTCTTCCAAGAGCACCTCAGCCTGGACCAGCTCAGCCTCGATCTGTACAAGGGCA  
GCGTTGCCCTGCGAGACATCCACCTGGAAATCTGGTCTGTGAACGAGGTGCTGGAGTCAATGGAGTCACC  
GCTGGAGCTGGTGAAGGCTTCGTGGGCTCCATCGAGGTGGCCGTGCCCTGGGCTGCTCTGCTCACCGAC  
CACTGCACAGTGCGCGTGTCCGGCCTCCAGCTCACCTTGCAGCCCCGCCGGGGTCCAGCGCCAGGGGCTG  
CCGACTCACAGAGCTGGGCCTCATGCATGACCACAAGCCTGCAGCTGGCCCAGGAGTGTCTGCGGGATGG  
GCTACCGGAGCCCTCTGAGCCACCACAGCCCCTGGAGGGGCTGGAGATGTTTGCCAGACCATTGAGACT  
GTGCTTCGGAGGATCAAAGTGACCTTCTGGACACTGTCGTGAGGGTGGAGCACTCTCCGGGTGATGGGG  
AACGTGGTGTGGCCGTCGAGGTCCGTGTGCAGAGACTGGAGTACTGTGATGAGGCAGTGCGGGACCCAAG  
CCAGGCGCCGCCGGTGGACGTGCATCAGCCGCCTGCCTTCTGCACAAGCTGCTGCAGCTGGCAGGGGTC

CGCCTGCACTACGAGGAGCTCCCGGCACAGGAAGAGCCTCCAGAGCCCCCTTGCAGATCGGCAGCTGCT  
CAGGGTACATGGAGCTGATGGTGAAGTTGAAGCAAAATGAGGCCTTCCCTGGCCCCAAGTTGGAGGTGGC  
GGGACAGCTGGGCTCCCTGCACCTGCTCCTGACCCCGAGGCAGCTCCAGCAACTTCAGGAACTGCTCAGC  
GCCGTGAGCCTTACAGACCACGAGGGCCTGGCTGACAAGCTGAACAAGAGCCGCCCGCTAGGTGCCGAAG  
ACCTGTGGCTGATTGAGCAGGACCTGAACCAGCAGCTGCAGGCAGGGGCAGTGGCTGAGCCCCCTAGCCC  
AGACCCCCTTACCAACCCCCTTCTCAACCTGGATAAAGCTGACCTCTTCTTCTCCATGGCTGGCCTCACA  
AGCAGTGTGGCCTCAGCCCTCTCTGAGCTCTCCCTCTCCGATGTAGACCTGGCCTCCTCTGTGCGCAGCG  
ACATGGCCTCCCGCCGGCTCTCTGCCCAGGCCACCCAGCTGGCAAGATGGCCCCCAACCCCCTCCTGGA  
CACCATGCGCCCTGACTCGCTGCTGAAGATGACCTTGGGGGGTGTGACCCTGACCTTGCTTCAGACGTCT  
GCCCCATCTTCCGGACCACCTGACCTCGCCACGCACTTTTTACCGAGTTTGATGCCACCAAGGATGGGC  
CCTTCGGTTCCCGAGACTTCCATCACCTTCGACCACGCTTCCAGAGGGCCTGTCCCTGTAGCCATGTTCTG  
GCTAACGGGCACAGCCGTGCAGCTGTCTGGGAGCTGCGGACGGGCAGTCGGGGCCGGCGGACAACCAGC  
ATGGAAGTGAAGTTCGGGCAGCTGGAGGTGCTGGAGTGTCTGTGGCCCCGGGGCACCTCTGAGCCTGAGT  
ACACGGAGATCCTGACCTTTCCTGGTACGCTGGGCTCCAGGCCTCAGCTCGGCCCTGCGCCATCTGCG  
CCACACACAGATCCTGCGCCGTGTGCCTAAGAGCCGACCCCGGCGCTCAGTTGCCTGCCATTGCCACTCA  
GAACTGGCCCTGGACCTGGCCAACTTCCAGGCGGACGTGGAGCTGGGGGGCCTGGACCGGCTGGCCGCC  
TACTGCGCCTGGCCACCGTACCTGCTGAGCCTCCAGCCGGCCTGCTGACAGAGCCCCTGCCGGCGATGGA  
GCAGCAGACGGTATTTTGGCTCTCTGCACCCCGGGCCACGCTGCGGCTGCGCTTCCCCATTGCCGACCTG  
CGGCCTGAGCCGGACCCCTGGGCGGGCCAGGCCGTGCGGGCTGAGCAGCTTCGGCTGGAGCTGAGTGAGC  
CCCAGTTCGGTCAGAGCTTAGCAGTGGGCCTGGTCCCCAGTCCCCACCCACCTGGAAGTACCTGCTC  
CGACCTACATGGTATCTATGAAGATGGAGGGAAGCCACCTGTCCCTTGCTGCGTGTCTCAAAGCCCTG  
GACCCCAAGAGCACTGGGCGCAAGTACTTCTGCCCCAGGTAGTGGTGACTGTGAACCCCACTCCAGCA  
GCACACAGTGGGAGGTGGCCCCGGAGAAGGGAGAGGAACTGGAGCTGTCAGTGGAGAGTCCCTGTGAGCT  
GCGGGAACCTGAGCCCTCGCCCTTCTCCTCTAAGAGGACCATGTATGAGACAGAGGAGATGGTGATCCCT  
GGAGACCCTGAGGAGATGAGGACGTTCCAGAGCCGGACCCTGGCACTGTCCCGCTGCAGCCTGGAAGTGA

TCCTGCCCAGTGTCCACATCTTTCTGCCCAGCAAGGAGGTCTACGAGAGCATCTACAACAGGATCAACAA  
CGACCTGCTCATGTGGGAGCCTGCAGATCTGCTTCCACCCCCGACCCGCCGCCAGCCCTCGGGCTTC  
CCCGGCCCTCAGGCTTCTGGCACGACAGCTTTAAGATGTGCAAGTCAGCCTTCAAGCTGGCCAACTGCT  
TTGATCTCACCCAGACTCGGACTCGGATGACGAGGATGCCCACTTCTTCTCAGTGGGGGCATCAGGTGG  
CCCACAGGCCGCTGCCCTGAGGCCCAAGTCTTCACTTGACAGAGCACCTTCTTACACTGGTGACAGTG  
CTGAAGGGGCGGATCACAGCCCTCTGTGAGACCAAGGATGAGGGTGGGAAGCGGCTGGAGGCTGTGCACG  
GGGAGCTGGTGCTGGACATGGAGCACGGTACCCTCTTACGCGTCTCCAGTACTGTGGCCAGCCAGGACT  
TGGCTACTTCTGTCTGGAAGCTGAAAAGGCAAACTCTACCACCGAGCGGCCGTGGATGACTACCCGCTG  
CCCAGTCACCTGGACCTTCCAGTTTCGCTCCCCGGCTCAGCTGGCCCCAACCATCTACCCATCGGAGG  
AAGGGGTGACCGAGCGGGGAGCCTCGGGCCGCAAGGGCCAGGGCCGGGGACCCACATGTTGTCCACTGC  
TGTGCGCATCCACCTGGACCCCCACAAGAATGTGAAGGAGTTCCTGGTGACACTGCGGTTGCACAAAGCC  
ACCTTGCGCCACTACATGGCCCTGCCCCGAGCAGAGCTGGCATTCCAGTTGTTGGAGTTCCTAGACGTGC  
TGGATGACCCTGTGCTGGGCTACCTGCCCCGACGGTCATCACCATCCTGCACACACACCTGTTCTCCTG  
CTCTGTGGACTATAGGCCACTCTACCTCCCAGTGCGTGTCTCATCACCGCGGAGACCTTCACTCTCTCC  
AGCAACATCATCATGGACACCTCCACCTTCCTGCTCAGGTTTCATCCTCGATGACTCCGCCTTGACCTGT  
CCGACAAGTGTGAGGTGGAGACCCTGGACCTGCGGCGAGATTATGTCTGTGTTTTGGATGTTGACCTCTT  
GGAATTGTGATTAACCTGGAAAGGGAGCACCGAGGGCAAACCTGAGCCAGCCACTATTCGAGCTGCGC  
TGCTCCAACAATGTGGTACACGTGCACAGCTGTGCCGACTCCTGTGCCCTGCTGGTCAACCTGCTCCAGT  
ACGTAATGAGCACAGGCGATCTGCACCCCCACCCCGCCCCCAGCCCCACGGAGATCGCCGGCCAGAA  
GCTCTCGGAGAGTCTGCCTCTCTGCCCTCGTGCCCCCAGTGGAGACGGCCCTCATCAACCAGCGTGAC  
CTGGCCGACGCCCTCCTGGACACCGAGCGCAGCCTACGGGAGCTGGCCCAGCCTTCAGGTGGCCACCTCC  
CTCAGGCGTCGCCATCTCCGTCTACCTATTCCAGGTGAACGGAGTGGGGCCCCACCCCTTCACCACC  
TGTCGGGGGCCCTGCTGGCAGCTTAGGGTCATGCTCAGAGGAGAAGGAAGATGAAAGGGAAGAGGAGGGC  
GATGGAGACACCCTGGACAGTGATGAGTTCTGCATCCTTGATGCTCCCGCCTGGGCATCCCCCCCCGAG  
ATGGGGAGCCTGTGGTGACACAGCTGCATCCCGGCCCATCGTTGTGAGGGACGGTACTTCTCACGGCC

GATCGGCAGCACGGACTTGCTGCGGGCACCTGCCCATTTCCAGTGCCCAGCACTCGGGTGGTGCTACGT  
GAGGTCTCCCTCGTCTGGCACCTCTATGGGGGCCGAGACTTTGGCCCCACCCCGGCCACAGGGCAAGAA  
CTGGCCTCTCAGGTCCCAGGAGCTCCCCTTCCCGCTGCTCTGGCCCCAACCGGCCCCAGAACTCATGGCG  
CACGCAGGGGGGCAGCGGGCGGCAGCACCATGTCCTCATGGAGATCCAGCTGAGCAAGGTAAGCTTCCAG  
CACGAGGTGTACCCAGCGGAGCCAGCCACAGGCCCTGCGGCCCCAGCCAGGAGCTGGAGGAGCGACCGC  
TGTCCCGTCAGGTGTTTCATCGTGCAGGAGCTGGAGGTCCGAGACCGGCTCGCCTCCTCCCAGATCAACAA  
GTTCTGTACCTACACACGAGTGAGCGGATGCCGCGACGTGCCACTCTAACATGCTCACCATCAAAGCG  
CTGCATGTGGCCCCACTACCAACCTGGGTGGGCCTGAGTGCTGTCTCCGCGTCTCGCTGATGCCCTGC  
GGCTCAATGTGGACCAGGATGCCCTCTTCTCCTCAAGGACTTCTTCACTAGTCTGGTGGCCGGCATCAA  
CCCCGTGGTCCCAGGGGAGACCTCCGCTGAGGCTCGCCCCGAGACTCGAGCCCAGCCCAGCAGCCCCCTG  
GAAGGGCAGGCCGAAGGCGTAGAGACCACTGGTTCGAGGAGGCCCCAGGAGGTGGACACAGCCCCCTCC  
CTCCTGACCAGCAGCCCATCTACTTCAGAGAGTTCCGCTTCACGTCTGAGGTCCCCATCTGGCTGGATTA  
CCATGGCAAGCACGTACGATGGACCAGGTGGGCACCTTTGCTGGCCTCCTCATCGGCCTGGCCCACTC  
AACTGCTCCGAGCTGAAGCTAAAGCGGCTCTGTTGCAGGCACGGGCTCCTGGGTGTGGACAAGGTGCTGG  
GCTATGCCCTCAACGAGTGGCTGCAGGACATCCGCAAGAACCAGCTGCCCCGGCCTGCTGGGAGGCGTGGG  
CCCCATGCACTCGGTTGTCCAGCTCTTCCAAGGGTTCCGGGACCTGCTGTGGGTGCCATTGAGCAGTAC  
AGGAAGGATGGCCGCCTCATGCGGGGGCTGCAGCGAGGGGCTGCCTCCTTTGGCTCATCCACAGCCTCTG  
CCGCCCTGGAACCTAGCAACCGGTTGGTACAGGCTATCCAGGCCACAGCTGAGACCGTGTATGACATCCT  
GTCCCCGGCAGCCCCCGTCTCCCGCTCCCTGCAGGATAAGCGCTCTGCGCGGAGGCTGCGCAGGGGCCAG  
CAGCCTGCCGACCTGCGGGAGGGTGTGGCCAAGGCCTACGACACAGTGCGAGAGGGCATCTTGGATACAG  
CTCAGACCATCTGTGACGTGGCATCGCGGGCCATGAGCAGAAGGGGCTGACGGGCGCCGTGGGGGGCGT  
GATCCGCCAGCTGCCCCGACTGTGGTGAAGCCGCTCATCCTGGCCACGGAGGCCACGTCCAGCCTGCTC  
GGGGGCATGCGCAACCAGATTGTCCCCGACGCCCACAAGGACCACGCCCTCAAGTGGCGCTCGGACAGTG  
CCCAAGACTGAGCCTGGGGTGCCCGGCACCCAGAGGGTGCTGCCACCATGCTCCTGAGCCTCCCAAGAG  
CTGCAGCCCACGGGCCCCGGCCCGCCTGGCCCTTCAGGGGATGGCCACTGTGAAGGACGCCTTCCCAGCC

TGCCCCGTTGCCAATCTGCTGTGAGAGGGGGCCTCCCTGCCTTGGGGCCTTAGCCCTGGCTCTGCACTTT  
TCCTCCGGGGAGAAAGGACACTGCCCCCTCCCCGACCTGGGCCCACACTGCTGCCTTCTCCCAGGACGGA  
GGCTTTTGGACCCTCGGACCCCATCCCACTCAGCCAAGTGTCTTTCTGTGTCTGGGGGGAGGAGGGGATG  
ATATCCGTGTGGTTCGATGTATTATTTTAAGCTCCGTGAGTGCGTGGGTCAGTGTCTGCATGAAGTGGA  
ATAAACTGCCCACCGCCA

>NM\_018036.7 Homo sapiens autophagy related 2B (ATG2B), mRNA

ACAGCCGGGAACGCGCCTCGCGGATGACAACAAATTCGTCGCGCGGCGGCAGTGGCGGTGGCTGCCTCAG  
CCCCTGCCGCCTCCTCTCGCGCTCTCTTGCACTCTCTCCGAGCCGGTTGGGACCCTCCTCGGAAGTCCCC  
TGGCCTGGGGCCAGGAGGACCCCTCTGCGTCTTGCTCCGCCAGGCCAGCGCGAGCGGTGCGGCGCCGG  
CGATGGGGTCTCCCTGAGGGACTCCCGGCACCAAATAGGGATGGAGGGGCGCCCCAGGCTTAGGCCCCG  
CCGCGGCCTGGAGCCGGAGTCGCTACCCCGAGGCCGGAGCCGTCGCAACCCGCAGCCGCAGTCAGCCCAG  
CTGCCAGCAGTCACTATGCCTTGGCCGTTTTCGGAGTCCATCAAGAAGAGGGCCTGCCGGTACCTCCTGC  
AGAGGTACCTGGGCCACTTTCTGCAGGAGAAGCTGAGCCTGGAGCAGCTCAGCCTGGACCTGTACCAAGG  
CACCGGGTCCCTCGCCCAGGTCCCCTTGACAAATGGTGTCTCAATGAGATCTTGGAGTCAGCAGATGCA  
CCCTTAGAAGTCACTGAAGGATTCATTCAGTCAATTTCCCTGTCAGTTCCATGGGGCTCTTTACTGCAGG  
ATAATTGTGCACTGGAAGTGAGAGGATTAGAAATGGTCTTCCGGCCTAGACCTCGCCCAGCAACTGGTTC  
TGAGCCTATGTATTGGTCAAGTTTTATGACCAGCAGTATGCAATTGGCAAAAGAATGTCTTAGCCAGAAA  
CTAACAGATGAACAAGGAGAAGGATCCCAGCCTTTGAAGGACTTGAAAAGTTTGCTGAAACCATTGAAA  
CAGTACTAAGAAGAGTAAAAGTCACTTTTATAGATACTGTTTTGAGAATTGAACATGTGCCAGAAAATTC  
CAAACTGGAACTGCACTTGAAATTCGAATAGAAAGAACTGTGTACTGTGATGAACTGCTGACGAATCC  
TCAGGAATTAATGTGCATCAACCCACTGCTTTTGCTCACAAGTTACTTCAGCTCTCTGGAGTGTCTCTCT  
TCTGGGATGAGTTTTCTGCATCAGCCAAATCTTCCCAGTGTGTTCAACTGCACCAGTGGAAGTGAAGCC

AAAGCTCTCACCTAGCTGGAACCCCAAATTATTTATGAGCCACCCACAGCTAACTAGAAATTTACCA  
GAGATAGCACCTTCTGACCCAGTGCAGATTGGACGGTTAATTGGTAGGTTGGAGTTGAGTCTCACGTTGA  
AACAGAATGAAGTGCTTCTGGAGCTAAGTTGGATGTTGATGGACAGATAGACTCTATTCATCTACTCCT  
GTCACCAAGACAGGTGCACTTGCTTTTGGATATGTTGGCAGCTATTGCTGGACCAGAAAATTCTAGCAAA  
ATAGGGTTAGCTAATAAAGATAGGAAAAATCGACCCATGCAGCAGGAAGACGAGTATCGAATTCAGATGG  
AATTAAACCGGTATTATTTGAGAAAAGATTCCCTCTCTGTGGGTGTATCTTCAGAGCAAAGCTTTTATGA  
GACAGAAACAGCTCGTACACCTTCTAGCCGTGAAGAAGAAGTATTCTTCTCCATGGCTGATATGGACATG  
TCTCATAGTCTCTCTTCTCTCCACCCCTTGGGGACCCCCAAACATGGACCTTGAGTTATCATTA ACTA  
GTACATATACAAATACCCAGCAGGATCTCCATTAAGTGCTACTGTGCTTCAGCCCACTTGGGGAGAGTT  
CCTTGATCATCATAAAGAACAGCCAGTAAGAGGGTCAACATTTCCATCCAACCTAGTTCACCCAACACCT  
TTACAGAAGACATCTCTCCATCTAGATCTGTTTCAGTGGATGAATCAAGGCCTGAACTTATTTTTAGAC  
TAGCTGTGGGAACTTTTCAATCTCTGTGCTTCACATTGATCCTTTATCTCCACCTGAAACGTCACAGAA  
CCTTAATCCATTGACACCTATGGCAGTAGCTTTCTTTACTTGTATAGAAAAGATTGATCCAGCAAGATTT  
TCAACAGAAGATTTTAAGTCTTTCCGAGCAGTGTTTGCAGAAGCTTGCTCACACGATCACCTTAGATTTA  
TAGGTACTGGCATTAAAGTATCCTATGAACAAAGACAAAGATCAGCTTCCCGATATTTTAGTACTGATAT  
GTCCATTGGGCAAATGGAATTTTTGGAGTGCCTATTTCCAACCTGATTTTCATTCTGTTCTCCTCACTAT  
ACAGAGCTTTTAACGTTCCATTCCAAAGAAGAACTGGTTCCTTCCCTGTGTGTCTTCAGCTTCATT  
ATAAGCATTCTGAGAATAGAGGGCCCCAGGGTAATCAAGCAAGACTTAGTTCAGTTCCTCACAAGGCAGA  
ATTGCAAATTAATTAATCCAGTGTGTTGTGAGCTGGATATCAGTATTGTGGACAGGTTAAATTCCTTG  
CTTCAACCACAGAACTTGCCACAGTAGAGATGATGGCATCCACATGTATACTTCATATAATAAACATA  
TTAGTCTGCACAAGGCTTTCACTGAAGTGTTCTAGATGATTCACATAGTCCTGCAAATTGTCGGATATC  
AGTACAAGTTGCCACACCAGCATTAACCTTTCTGTTGCTTCCCAATACCTGATCTTCGATCTGATCAA  
GAAAGAGGACCATGGTTTAAGAAGTCACTTCAGAAGGAGATCCTTTATTTAGCCTTCACAGATCTAGAAT  
TTAAGACTGAATTTATAGGAGGATCAACCCAGAACAAATTAATTGGAACCTTACCTTTAGAGAACTAAT  
TGGATCGTTCCAGGAAGAGAAAGGAGATCCATCTATTAAGTTTTTCATGTGTCTAGTGGAGTAGATGGA

GATACAACATCGTCAGATGACTTTGACTGGCCACGAATTGTAAGTAAAATAATCCACCAGCCATGCATT  
CCATTTTGGAGAGAATTGCAGCTGAAGAAGAAGAGGAGAATGATGGTCACTACCAGGAGGAAGAGGAAGG  
AGGTGCTCATTCTTGAAAGATGTTTGTGATCTAAGAAGACCAGCCCCATCTCCTTTTTCTTCTCGTAGA  
GTAATGTTTGAATGAACAGATGGTGTGATGCCAGGAGACCCTGTAGAAATGACAGAATTCAGGATAAAG  
CAATCAGCAATTCTCACTATGTGCTGGAACCTACGTTACCAAATATTTATGTAACACTACCTAATAAGAG  
CTTTTATGAGAAGCTTTATAATAGGATCTTTAATGACTTGCTACTGTGGGAACCAACAGCTCCTTCACCA  
GTGGAGACATTCGAGAATATTTCTATGGCATTGGGCTTTCAGTAGCCAGTCAGCTCATTAATACTTTCA  
ACAAAGATAGTTTTAGTGCATTTAAATCTGCAGTTCCTATGATGAGGAAAGTGGATCTGAGGAGGAGAC  
TTTGCAGTATTTTTCCACTGTTGATCCCACTATCGTTCTCGCAGGAAAAAAAAAATTAGACTCTCAGAAC  
AAGAACTCTCAGAGTTTTCTCTCAGTCTTCTGAATATTAATCATGGATTAATAGCAGTGTTCACAGATG  
TGAAGCAAGATAATGGAGATCTGTTGGAAAACAAGCATGGTGAATTCTGGTTAGAGTTCAATAGTGGTTC  
ATTATTTTGTGTGACAAAATATGAAGGTTTTGATGACAAGCACTACATTTGCCTTCATTCTAGCAGTTTC  
AGTCTGTACCATAAAGGCATAGTGAATGGAGTGATTCTCCCGACAGAAACACGACTTCCCAGCTCAACCC  
GCCCACTGGTTGGAACCTACTATTTATCTCTGAAGAAGATGGCCTCAGTAAACTTCTTCAGATGG  
AGTTGGAGGAGACAGTTTGAATATGCTGTCTGTTGCCGTTAAATATTGTCTGATAAATCAGAGTCCAAT  
ACAAAGGAATTTCTCATTGCCGTAGGACTGAAAGGAGCCACTCTCCAGCATAGAATGCTTCCTTCTGGGC  
TTAGCTGGCATGAGCAGATTTTATACTTCTTGAATATTGCTGATGAACCTGTTTTGGGATATAATCCTCC  
AACTTCATTTACAACTTTTCATGTTTCATCTTTGGAGCTGTGCACTTGATTATAGACCCCTTATTTGCCA  
ATCCGATCTCTTCTTACCGTGGAACATTCAAGTGTTCAGTAGCGTTGCATTGGATAAATCTTCCTCTA  
CTCTCAGAATAATCTTGGATGAAGCTGCTTTACATCTATCTGACAAATGCAATACTGTCACTATAAATCT  
GAGTAGAGATTATGTTCTGTGATGGATATGGGGCTTTGGAGTTAACCATAACTGCAGTGAAGTCTGAT  
TCTGATGGAGAGCAAAGTGAAGCTTTGAGTTACACTGTTCCAGCGATGTTGTCCATATCAGAACGT  
GCTCAGACTCTTGTGCTGCGTTAATGAATCTCATTCACTGATTGCAAGCTATGGTGAAGTGCAGACACC  
TAACAAGGCAGATATGAAGCCTGGAGCCTTTCAAAGAAGGTCTAAGGTAGATTCCAGTGGTCGATCATCC  
TCACGTGGTCCAGTACTTCTGAAGCAGATCAACAAATGTTACGAGATCTGATGAGTGTGCTATGGAGG

AGATCGACATGCAACAAGGCACCTCGTCAGTAAAACACAGGCTAATGGTGTGTTTGGATGAAAAATCTCA  
AATTCAGGAGCCATGTTGTTGAGACCTCTCCTGTTTCTGACGAGAGTGGGAATGTATCCCAGGAGTCC  
GGCCCCACCTATGCCTCATTCTCTCACCATTTCATCAGTGATGCAATGACAGGTGTGCCCACTGAGAATG  
ATGACTTTTGCACTCTTTTTGCACCAAAGCAGCCATGCAGGAGAAGGAAGAAGAACCAGTTATAAAAAT  
CATGGTTGATGATGCAATTGTGATAAGAGACAATTATTTAGTCTGCCCCGTTAATAAGACCGATACGAGC  
AAAGCCCCCTTACACTTTCCATTCTGTGATTCGCTATGTGGTGAAGGAGGTCTCTCTGTCTGGCATC  
TTTATGGAGGAAAGGATTTTGAATAGTCCCTCCCACTTCTCCGGCTAAAAGTTATATTAGTCCCCACAG  
TTCGCCTTCTCACACACCCACGAGACATGGACGTAATACAGTATGTGGGGGAAAAGGAAGGAACCATGAC  
TTTTTAATGGAAATACAGCTAAGCAAGGTGAAGTTTCAGCATGAAGTCTACCCGCCATGCAAACCTGATT  
GTGATTCCAGCCTCTCAGAACACCCAGTCTCCCGGCAGGTGTTTCATTGTTTCAGGATCTTGAGATTGAGA  
TCGTTTGGCAACATCACAAATGAATAAATTTTTATACCTGTATTGCAGTAAAGAAATGCCTCGAAAAGCT  
CACTCCAACATGTTGACAGTGAAAGCCTTACACGTGTGTCCAGAATCTGGCAGGTCCCCACAGGAGTGCT  
GCTTGAGAGTGTCGCTGATGCCGCTCCGCCTCAATATTGACCAGGATGCTTTGTTCTTCTGAAGGATTT  
CTTCACAAGTCTTTCTGCAGAAGTAGAGCTTCAAATGACTCCAGATCCAGAAGTTAAAAAGTCTCCTGGA  
GCTGATGTCACCTGCAGTTTGCCAAGGCATTTGAGTACCTCAAAGGAGCCAAATCTGGTTATTTCTTTCT  
CTGGGCCAAAACAGCCTTCCCAAATGATAGTGCCAATTCAGTGGAAGTGGTTAATGGCATGGAAGAGAA  
GAACTTCTCTGCTGAAGAAGCATCTTTTAGGGATCAGCCTGTGTTTTTTAGAGAATTTAGATTCACGTCA  
GAAGTTCCCATTCGACTTGATTATCATGGCAAACATGTATCAATGGATCAGGGTACGCTAGCTGGGATTT  
TGATTGGTCTGGCTCAGTTAAACTGCTCTGAACTAAAGCTCAAGAGGCTTTCCTATCGACATGGTTTACT  
AGGCGTTGACAAATTATTCTCATATGCAATCACTGAGTGGCTTAATGACATTAAGAAGAACCAGCTACCA  
GGAATCCTGGGAGGTGTTGGACCTATGCATTCACTAGTACAATTAGTACAAGGCCTAAAGGACTTGGTCT  
GGCTCCAATAGAGCAGTACCGGAAGGATGGCCGCATTGTCAGAGGGTTTCAGAGAGGCGCTGCTTCCTT  
TGGTACCTCGACAGCGATGGCTGCTCTAGAACTCACAAACAGAATGGTTCAAACCATACAGGCAGCTGCA  
GAGACTGCTTATGATATGGTGTCTCCTGGTACCCTTTCTATCGAGCCCAAGAAGACCAAAAGGTTTCCTC  
ATCACCGGTTAGCCCACCAGCCAGTAGACCTGAGGGAAGGTGTGGCCAAGGCCTACAGTGTTGTGAAAGA

GGGAATCACAGACACGGCTCAGACCATTTATGAAACTGCGGCTCGAGAACACGAGAGCAGAGGGGTGACT  
GGTGCCGTGGGCGAGGTTCTGCGCCAGATTCTCCGGCAGTGGTGAAACCTCTGATTGTTGCCACAGAAG  
CAACGTCAAACGTGCTGGGTGGCATGAGAAACCAAATTAGGCCAGATGTCCGGCAAGACGAGTCACAGAA  
ATGGCGCCACGGGGATGACTGATGGCTTGGAACTGACAGTGTGAAGATAAGGAGAGTGGAACCAGGAGCT  
CAGAGTCCTGACAGCAGCTTCAGAGGAAGCTCGTTTAATTTTATTGTGCTCATCTCAGGAACAAAAGCAT  
TTTTTAGTTAAATAATTTAACATCAAAACAACATGCAACCAAAACTTCTGACATTTATAGTTGATACTT  
GCCTATAGAAATGTTTGGTGGCTGGTGTCAAAGGTCCTTAAAGCATTGCTGCCAAGTTAGTGGAAGGCT  
CACTTTTGTTAAGATGACTGTAATTCTCCTTGTTACCGACGAGAGATCATTGGAAGCTGCCTTCTAACAC  
TTTGTGTAGCTCTGTGGAGTTGGATTTTCTTAAGGTTTAAAAGAATCACAGCTTCGGAACTTTTAACTG  
AAAATGAGAGACAGAAGCCACAGGGGAAGCAAAGCAAATAGGATTTTCAATATAAATATCAGTGTGGAAA  
AATAACCTATTCTGTTGAATTTAGTGTTTCATGCACTTGAGAACAACATTATTTCCATTTACTCCGAAAAT  
CCTTCTGTGGGGGTTTGAGAAAGTGAATGTTGCAGACATGTTCTGTTGTGTTGCACTTTATCCTGTGTTT  
ATGTGTATGTGTTTTAGATTAATTCAAGTTGTGTGCTATATTTCTGTATAATTTACAAAGTTACACAA  
AATATAAGAGCAGTAACTTGTCTGAAAGTTTTTGGCAAAGGAAGGTAAGTTCAATGTAATAGCTTCCT  
TTAAGAGTACAGGAAAATGCATTCTGTAATGAAGTGGGGCCCATGTAATTGTTTATATTTTCAGTTTTAA  
GCAGGTATAGTGCAGGCTTGTTAGGAATGTGTGGAAGGGAAGATTGGAAGTGATTTTTCTCTTTTAAAA  
GTAAACAAAATTCTTCAAATATGCCCTAGTTAACTATTTTCAGCATACCATTTTTACTTGGTTAACAGTGT  
ACATTTTGATAACCTATCAGGAATGAATAAAGTATTTTTATTTAAAGGTGATATTGTTTTATGCTTCCAT  
GAATATTTTGCTTTTCTTAGAGCATATTCATAGATGCAGTACTGTGATTACCACAAGATAATTGGGAAC  
ACTTCTCAAAATCGATTTTGGTTAATATCAGGTAAATCATTACCTAGGAGTAAGAGGGAAATTGTTGTC  
AATTCCTGACTTTAGATTGATCCAGCAGAAAGAAAAGGTGGAACTTTGTATATATCCACTGTTGAAAGTT  
GCATGACCTGACTTCCTGTTTTCTAAAGTTGGGGGAATATTATTGAACTTCAATTTCAGAACTGCATTC  
AATTTGGGGCTTGAAAAATGTAGTTAAATCAATTTCTGTTCTCTAAATTTCTAAGCAGGAAAGCAATGTA  
AACCAAAAATCAAAATGTTTAGAATTTATAAAAATGGGGTTATATAGCTTTTAATTTTAGTTTCCTTTTT  
ACTGCCAAAAAATTTAAAAAGACAACAGCGTAACCACTGTTTAAGCACCGTGGGACCATCTCTTATTCG

GGTAGAGCCTGGTCCTGGCGACACACTAACAGGAAGGCGTGCTGTGTTACCGGGAAGGCGCCTCTGGCTG  
TGGGGTGCGTTCTGACCACCCCGCTCAGATGCCAGCATTTTCCATTTGCCCTTAAGGAACTTGCTATGT  
GTGTTAACCCAGTTATGATTAGTCAAACCTGGAAAACACTTGATCAAACCTAAAATTGTAAAATCTGTCTA  
ACTTTTAAATATACTTTCCACAGTTGTACTTAAGTTCAATTAACCTACAGTATAGAGAAAAATAATTATTC  
TCTTCTTGCACCCGGAGTTGCAAACAAATTAAGTTTACAAATCTCATTTAAACATATATCTTTGTAATG  
TAATCTCCGCGGTTCTTTCTTTGTTCTACCCTCCTGCACCTGTTGTCGATGTAATCATTTTGGGAACAGA  
AACGTTGTGTCTCAAAAAGATTCTGTTGTCAGTTCAGCCAAGATGTTCTTTACCTGAGATTCTGGAAAGAT  
GTTTATCTATATCGGAACACTTCTACATTATTAAATGTCCTTAAGCTTTTTCTTTTTTACAAGTGCTTTT  
TCAGACTTTGGTGTTGTGATGACACAGTAGAAAGAGCGTGGCTAGAATCCGTGGTTTGCCACATCTGCAG  
CTTACCAAACGGATGACTTGTCCAGGACATCTGATCCCTGTAAGCCTCAGCATCCCTCCTGGTAAATGGA  
GGGTTTTTTACGACAAAGCCCAAAGGGAGGTTTTGGATGATTAGGCTGTGTGTGCGTGTGAGAATGATCA  
CATGTGGCGTCATGCTTTGTACAGAGCCTCAGACCACTGGGCCTCGTCCAGTGAGAGTCTCTCTGGCGA  
CATCACACGCGGAGCAGCCAGGGGCCACCTTAGATCTCAGATCTCTCAGAGCAATACTTTTCTGAACTGC  
CACTGTGCCTGGGTGGTTGGGTTGGTGTCATGCTTCTGACTAGAGTAGATCGCGCATGTCCACCAAGTGAT  
ACGTTGAGTCCTTACAGTTCCCCCATGGAGTCCCATAAGCAGCTCCATCGAGATCTGTCAGCAAGTTGC  
AGGACCCCAATGTTCTGACATGTTAAGACCCCTTACATGACGAGTAGAGAGGCAGCTGAGGCCACAA  
CCGTGTCTTCCTCTTGAATGGAGCTAACTCGGAACCCCCGTTTTCTTCTCCTTTCTGCCACCACTGAA  
CATTGCCTTTTAGATAACTCAGTGTTTCTTCTAGATGTCATAGCAATAGACTTTCATTTTCATGAAGTTT  
GGGTACGATTTGGATTCTCGCTTAAGTACATATATTTATCAATATTTTATAAGGCAAAGTTCACTTAAA  
AAATCTTTCCAAGTAGCAGTGTGCCTAAGATGGCAAATACTAAAACTGGTGTTTCCTGCTCCTGTTGT  
GTGTCACTTTTCAAGCCGATTGAAATATTTCTGGCTTTTAGGGCATTACTTTTAACTATCTCCTTTAAA  
AACGATGTTCTGTAGGTTTAGTGTCTTTGTTCAATTTCCAAAAGAGTCCAGACAACTGTGTCTGCCCTGC  
AGAGGCTGTTTGTCAAAGGCAGCATGCCGCTTCCACCGGAATGCAGACAGCAGGGGAGCGGAATTCTAA  
AGCAGCGACTTAAAATGAGGAATCCCCAATTGCACTAAATGGTTTCAGGATTGACTAATCATTGTCTTAA  
CATTAACCTCAGATTTTCAATGTGTAAAGAGCTGTGTGACTTGGCGTCTGAGAGATCCCTCTGCTTTGCTT

TGCTTCAGAGTCCTCGCACCCGCATCCTCAGAACTGTGGGGCATGGTGGGCTCTAACGAGCACTCCCCTT  
CTGTTTTCTTCATTACTTTTGACCTCCTTAAGACTTCAGAGAGAATGTCCGTCAAGTTCTTTTCTCCAT  
CAAGTTCTTTAAGTTCCTTGAAAGGAAGGGACTGTGCAAACACAAAGCAATATTCTTTTGATCTGCAAA  
TGCATCAGCTGGACATACCAATTGGTATCAAATAGAATAAAATCAAATATAAATGTTTGAGTCTTAGGTT  
AAAAAGGAAGGTTATTTGTATAGTTTATAGATAATGAAGGAAAAATTTCTTTTCATTGCAGGAAATCTT  
GTTTACTGGAAGATAGAGTCACTCTTTTCATATAAGACAAATAGTGCTTTAATGCCAACTTCTTTTATC  
TCAACATTTCAGGATCATGCTAGGCACACTGCCCCCTTGAATAGACATTATATGCACAGTTGCAAGTCAG  
CCAATGTTTTTATTCAGAAGTATTTCCCCCATTATAGTGCCTGCATATCAGAGATACAAAAAGCATCCA  
ACACACTACCGTAATAGGCTTCTTTGGGGATGAGAAATTTGAGTCTCAACAACTCAGAGTTTGAGATGTC  
AGCTTTTTTGGTAAACGTAGGTGTTAGAGGTATATTTGCTTTCCTACAACAATTGTTGGCCCTTGATT  
CAAGCATGTTGCTTCATAGGAAGCACCAGAGTGCCATCTGCTGCATTTCAAGAGATTGTAAATGTCATCT  
CAGCTGGCTCAGTTATATCTCTAATGTCCCGGGTAGCAGCACCTCCCTCTAAAAATATGTTTACTTCACT  
GTTTCACTTGATTTTTGTGTATACGAAATGGCAGCTTCCGATTTCTAGTTGGATTTGTCTTGATTGTTT  
GTATAACTTGCTGGTCACCCAGGGCTATTTGCTTTTTCATTGAGAAATTTGGTAGGGGTGTCTAGTTCAG  
CTTTTATGTTGATCCATCCTGACTTATTTTAGACATTGAATTTATCTCACCACAAGTAAAAGAACATGTG  
TATTGACTGTCTTTGCTAAGTTTCCTAATTTTCTAATTATGGCAATTATGGATGTGAATAAGAATACT  
GATGCTGTACAAATATTTTGTGGAAATGTACCTTGTTAATGTGACTATTTAAATAATATGAAAATAAGA  
ATACTCTTGAAGAAAAAATTTAAATATTTACTCTTTGGATTTTGCTTTAAACACTTGTCTTTCACCAAGA  
AGTGTTCCCAAACTTGTGTAAATACTTATTGGGGTGGGGTGTACATCTGCCTCAGACCTTGTTATTGG  
GAAATGATGTTCCAGTGCCCCTGATGCTTCTGATAGCAGATCTTGGGTCTGTCTGCTACTGATTGCTGAG  
CTGTATGGAGTTTAAACAGTTCCTCCCTCCCTGCTTTGGATTTTAGTCCCTCTATTAGTTATCCTATCCC  
TGCAATAAGGACTTGCAGCAAACACACCTCCTAGTTTGATATCACGAACTGATAACTATTTGGAGGAGT  
ATTTTACTTATGAAGGGAATATTTAAAGACATACTTATTTTATTTTATTTATTTTTCAGACG  
GAGCTTTGCTCTTGTTGCCAGGCTGGAGTACAATGGAGCAATCTTAGCTCACTGCAGCCTCCACCTCCT  
GGGTTCAAGCGATTCTCTGCCTCAGCCTCCTGAGTAGTTGGGATTACAGGCACCTGCCACCACGCCCCA

CAAATTTTTGTTTTTTAGTAGAGACGAGGTTTCACCGTGTTGGCCAGGTAACTCAGCCTGGTCTCG  
AACTCTTGACCTCAGCCTCCAAAAATGCTGGGATTACAGGCATGAGCCACCGTGCCTGGCCAGACATACT  
TATTTTAAAGGGCAATTTACTTTAAAAGATTTTGTGTGACAGATGTGACTATATAACATCCACTTTGAA  
CAATTAGGGAAAAAATGACAAGTCACACTTCACCCATGGCTCTTGTTGAAAAAAGGGATGGGGACAATTG  
TGAGATGCTTACTGTGTGCCAAGTATCCTACTGTCTTTTATAATTTACAGCCCCCACTCAGAGGCAGT  
TACTAGAGTCCCTGTTTTCCAGATGAGGAGACAGGTTTCAGAGAGGTCAAGAACTTGCTCACCGTCACAT  
GGTTTGACTTCAGACCTCATGCTCTTCCAGGACTTCATTTAAGAAAAGCTTGGAGCAGTTACCTAACT  
TAGCAAAAAGTCTTCACTAATTGGGAAACCACAGAATTTTGCTAGAAGATTGAGATTAAAGGCTCTTAGA  
ATATTTGAGCAAGAAAATGTGCTTGATCTCTCCTGGCGTCTCCAGCCCCTCTCCCCTCTTCTGGCTGTG  
CTTAGCCACCCCAGCGGTTCAAGTTCTGCATGCCCCGTGAGTAGGGGTTAGCACCACTGGAAGATTTCTTT  
CTATAAATGCTGCACCACAGGCCACAGTCAACACTGATTAAAGCAAAATCTCAGAATGGGGCTAAAGTCG  
GGTTTCTCCACCTCAGCAGTTGACATTTGGGACCAGCCTGTGCATTGTAGGATGCAGGGGATGTTGCCAC  
CCTCCCACCCCCGCTGGCCTCTGGCCACTGGATGCCAGTAACAACTCCCCTCCCCAGTTGTGACAGC  
CAAAGACGTCTCCAGACATGGCCAAATATGCCAAATATGACAAAAATCCCCTGTAAAAATCACTGGGCT  
AAGAGCTCTCCTGGGGAAAATCATGCACAGCCTGGGGCAAGAACGCGCTATGGCCGCCCAACTCGGATG  
CTCTGTCGGGATCTCTGGCTGCTCCTGCTGTCTCAGCCCGGAGGCTCCACTTCAGGCAGCCTGGCCACCC  
TCCCTTCCTCTCTGTTTCCCACTATAGCATGCTTTCCTTTTTTTGTTTGTTAACTTTGCGGCACTCCC  
CGCATACTGTAGATCCACGTCTGTTTCCCTGTTTGACTTCCTTCAGGAGGGCAAGGGACTTAGGGACCCG  
GTGCCTAGCACAGTGCCTTGCCAGAGTCAGGGATCAGCAAATGGTGAATGAGTGAATGAATGAATGAAT  
GAGTGAGTGAACCCGAGTGGTCATCTAGTCCTGTCTGCAGGTGAGGAAATCGAAGCCCGGAGAGGGGAAA  
TTCTTTGCCAAGATCACATGATTACTACTTACAGATGTCCTTTATTCAATGTAAGCTCACGTTTTCTTG  
ATTTAGCAATACTTGTAATAATTTTTAAAATATAAATATATATGAAATAAAAGTTCATCATTGATTGAC  
TA

>NM\_022488.5 Homo sapiens autophagy related 3 (ATG3), transcript variant 1, mRNA

AGTGTACGTGAGGCCCCGGTGGCGGCGCAGCTACGGCAAGAGAGTGAGAAGGAAGGGAAGCCGGAAGGG  
GCGCGAGTGAAGCAAAGCGAGGACAGACAGCTCGCAGAGGGCGAGGGGTGCGTGTGCGTCCGCTTCTCAC  
CTCAGGTCTCCCTTCGGCCCCGCTGCCCTCCCTCGCGGCTGGGTGACAGCTGGGTCCGGTCCGTGCGGG  
CTGCCTGGGGTGCGAGGATCGCGCACCCGCTTCGCGCGCTGTGCCTGCCGCCCCGCCCCCTCGTCCCG  
CCCGTCCCGTCGCGTCGCGTCCCGTCCCTCGGGTGCTGCCAGCCGGGTGCTGATGCGAGTCGGTGGCAG  
CGAGGACATTTTCTGACTCCCTGGCCCCTGACACGGCTGCACTTTCCATCCCGTCGCGGGGCCGGCCGCT  
ACTCCGGCCCCAGGATGCAGAATGTGATTAATACTGTGAAGGGAAAGGCACTGGAAGTGGCTGAGTACCT  
GACCCCGGTCCTCAAGGAATCAAAGTTTAAGGAAACAGGTGTAATTACCCAGAAGAGTTTGTGGCAGCT  
GGAGATCACCTAGTCCACCACTGTCCAACATGGCAATGGGCTACAGGGGAAGAATTGAAAGTGAAGGCAT  
ACCTACCAACAGGCAAACAATTTTTGGTAACCAAAAATGTGCCGTGCTATAAGCGGTGCAAACAGATGGA  
ATATTCAGATGAATTGGAAGCTATCATTGAAGAAGATGATGGTGATGGCGGATGGGTAGATACATATCAC  
AACACAGGTATTACAGGAATAACGGAAGCCGTTAAAGAGATCACACTGGAAAATAAGGACAATATAAGGC  
TTCAAGATTGCTCAGCACTATGTGAAGAGGAAGAAGATGAAGATGAAGGAGAAGCTGCAGATATGGAAGA  
ATATGAAGAGAGTGATTGTTGGAAACAGATGAGGCTACCCTAGATACAAGGAAAATAGTAGAAGCTTGT  
AAAGCCAAAACCTGATGCTGGCGGTGAAGATGCTATTTTGCAAACCAGAACTTATGACCTTTACATCACTT  
ATGATAAATATTACCAGACTCCACGATTATGGTTGTTTGGCTATGATGAGCAACGGCAGCCTTTAACAGT  
TGAGCACATGTATGAAGACATCAGTCAGGATCATGTGAAGAAAACAGTGACCATTGAAAATCACCTCAT  
CTGCCACCACCTCCCATGTGTTCAAGTTCACCCATGCAGGCATGCTGAGGTGATGAAGAAAATCATTGAGA  
CTGTTGCAGAAGGAGGGGGGAGAACTGGAGTTCATATGTATCTTCTTATTTTCTTGAAATTTGTACAAGC  
TGTCATTCCAACAATAGAATATGACTACACAAGACACTTCACAATGTAATGAAGAGAGCATAAAATCTAT  
CCTAATTATTGGTTCTGATTTTTAAAGAATTAACCCATAGATGTGACCATTGACCATATTCATCAATATA  
TACAGTTTCTCTAATAAGGGACTTATATGTTTATGCATTAAATAAAAATATGTTCCACTACCAGCCTTAC

TTGTTTAATAAAAAATCAGTGCAAAGAGA

>NM\_052936.5 Homo sapiens autophagy related 4A cysteine peptidase (ATG4A), transcript variant 1, mRNA

GTCCGTAGTCAAGTTGCCGGTGAATTGGCCCAGGATGACAGCTGGAGAATGGAGTCAGTTTTATCCAAG  
TATGAAGATCAGATTACTATTTTCACTGACTACCTAGAAGAATATCCAGATACAGATGAGCTGGTATGGA  
TCTTAGGGAAGCAGCATCTCCTTAAAACAGAAAAATCTAAGCTGTTGTCTGATATAAGTGCTCGTCTATG  
GTTTACATACAGAAGGAAATTTTACCAATTGGTGGAACGGGCCCTTCATCAGATGCTGGTTGGGGATGT  
ATGCTACGCTGTGGACAGATGATGCTGGCTCAAGCCCTTATCTGTAGACACTTGGGAAGGGACTGGAGCT  
GGGAGAAACAAAAAGAACAACCCAAAGAATACCAACGCATCCTACAGTGCTTCTTAGATAGAAAAGATTG  
TTGCTACTCTATCCATCAAATGGCACAAATGGGTGTAGGAGAAGGGAAATCAATTGGAGAATGGTTTGA  
CCAAATACAGTTGCACAGGTGTTAAAAAACTTGCTTTATTTGACGAATGGAATTCCTTGGCTGTTTATG  
TTTCAATGGATAACACAGTGGTCATTGAAGATATCAAAAAATGTGCCGTGTCCTTCCCTTGAGTGCTGA  
CACAGCTGGTGACAGGCCTCCCGATTCTTAACTGCTTCAAACCAGAGTAAGGGCACCTCTGCCTACTGC  
TCAGCCTGGAAACCCCTGCTGCTCATTGTGCCCTTCGCCTGGGCATAAACCAAATCAATCCTGTCTATG  
TTGATGCATTCAAAGAGTGTTTTAAGATGCCACAGTCTTTAGGGGCATTAGGAGGAAAACCAAATAACGC  
GTATTATTTCATAGGATTCTTAGGTGACGAGCTCATCTTCTGGACCCTCATACAACCCAGACCTTTGTT  
GACACTGAAGAGAATGGAACGGTTAATGACCAGACTTTCATTGCCTGCAGTCCCCACAGCGAATGAACA  
TCCTAAACCTGGATCCTTCAGTTGCATTGGGATTTTTCTGCAAAGAAGAAAAAGACTTTGATAACTGGTG  
TAGCCTTGTTTCAAGGAAATTCTAAAGGAGAATTTAAGGATGTTTGAATTAGTTCAGAAACATCCATCA  
CACTGGCCTCCCTTTGTACCTCCAGCCAAGCCAGAAGTGACAACCACTGGGGCAGAATTCATTGACTCTA  
CTGAGCAACTGGAGGAGTTTGATCTGGAGGAAGATTTTGAGATTCTGAGTGTGTAGAATCCTGGGAACTC  
AACTGAAGGTCTGTCTTCCATCTGGCACCATAAAAAACATGAACTTATTGCATAAACTTTTCTAGTCAG  
CAAGTGCTGATATGCCAATAGCATACAACTCAATAGCAATCATGACTGAGCCAATCACTGTTTCTCAG

AAAAACAAAACAAAACAAAACAAATGACAGTAACCCCTCCCCGAAAGAAATAGAACAATCATGGAGCCT  
AGGAGCAGAGAGATGAGGAGGAGTTCATTGCTTCCCAGCTTGTGTTATATGGCTACAGCAAGTCTTCAGC  
TGCTGCAATGAGGAAATGGGCATCTGGAAGACAAACAGCAACTCTCAGCTTGCTTCAAGAACCAGCAGAT  
AAGAGATGGTTAAGCTGTTCTTCACCCTTTCAGATGTGACCTCTTTTGGACTAAGCAGCAATCTGTTCTC  
TTGCTCAAATAATAAAGTGACTGAATCAGGGAGGAAAAGGTTCTTGTTAAATTATTTGATTGTGTAGTTG  
AAGTAATTATAATTTATATCAAAACGTTTGTCAAAGAAACGATGTCAAATATACACTTCTTGATCTCCCT  
TCTGTTTGCGGGGATCTTACTATTTGATGGGTCACTGTCCCCATTCTTACTGATACTTTTGTGAGATATC  
ACCCTGTCCTTAAATCATGATCACTTAAATCAGGGGTCAGCAAACTTTTTCTGTAAAGGGCCAGACGGGA  
AATATTTTGGGCTTTGCAGGCCATGCGGCCTCTGTCACATCTACTCAACTCTGCTGTTGACATGCAAAAG  
CAGCAATAGACAATATGCGTGTAATGAGTGTGGCTGTAATCCAAGAAAACCTTATTTACAAAAGCAGGT  
GGAGGGCTGGGTTTGGCCTGCAGGCTGTAGCTTGCCAATCAGTGACTTAAATTGTTGATTTTTGTTTGAT  
AAATTAATAAATAAATTGTGTTTGAAGTATACCCTA

>NM\_013325.5 Homo sapiens autophagy related 4B cysteine peptidase (ATG4B), transcript variant 1,  
mRNA

AGTCGGCGGCCGGACTGGGAAGATGGACGCAGCTACTCTGACCTACGACACTCTCCGGTTTGCTGAGTTT  
GAAGATTTTCCTGAGACCTCAGAGCCCGTTTGGATACTGGGTAGAAAATACAGCATTTTCACAGAAAAGG  
ACGAGATCTTGTCTGATGTGGCATCTAGACTTTGGTTTACATACAGGAAAACTTTCCAGCCATTGGGGG  
GACAGGCCCCACCTCGGACACAGGCTGGGGCTGCATGCTGCGGTGTGGACAGATGATCTTTGCCAAGCC  
CTGGTGTGCCGGCACCTAGGCCGAGATTGGAGGTGGACACAAAGGAAGAGGCAGCCAGACAGCTACTTCA  
GCGTCCTCAACGCATTCATCGACAGGAAGGACAGTTACTACTCCATTCACCAGATAGCGCAAATGGGAGT  
TGCGGAAGGCAAGTCCATAGGCCAGTGGTACGGGCCCAACTGTCGCCCAGGTCCTGAAGAAGCTTGCT  
GTCTTCGATACGTGGAGCTCCTTGGCGGTCCACATTGCAATGGACAACACTGTTGTGATGGAGGAAATCA  
GAAGGTTGTGCAGGACCAGCGTTCCTGTGCAGGCGCCACTGCGTTTCCTGCAGATTCCGACCGGCACTG

CAACGGATTCCCTGCCGGAGCTGAGGTACCAACAGGCCGTCGCCATGGAGACCCCTGGTACTTCTCATT  
CCCCTGCGCCTGGGGCTCACGGACATCAACGAGGCCTACGTGGAGACGCTGAAGCACTGCTTCATGATGC  
CCCAGTCCCTGGGCGTCATCGGAGGGAAGCCCAACAGCGCCCACTACTTCATCGGCTACGTTGGTGAGGA  
GCTCATCTACCTGGACCCCCACACCACGCAGCCAGCCGTGGAGCCCACTGATGGCTGCTTCATCCCGGAC  
GAGAGCTTCCACTGCCAGCACCCGCCGTGCCGCATGAGCATCGCGGAGCTTGACCCGTCCATCGCTGTGG  
GGTTTTCTGTAAGACTGAAGATGACTTCAATGATTGGTGCCAGCAAGTCAAAAAGCTGTCTCTGCTTGG  
AGGTGCCCTGCCCATGTTTGAGCTGGTGGAGCTGCAGCCTTCACATCTGGCCTGCCCCGACGTCCTGAAC  
CTGTCCCTAGATTCTTCTGATGTAGAGCGACTGGAAAGATTCTTCGACTCAGAAGATGAAGACTTTGAAA  
TCCTGTCCCTTTGAAAATCCTGGGGTCGGGGGTGGCACCTGTGAGAGCCTGGGGCTCCTGGTGCCGCTGC  
GTTTCATCCATCCCGCCCGCTCGCCTGCCGAGGGCTGCGCCCCGTGCTGCCTCCCCCAGAGGGCCACCC  
GCTGTGCTCGTGGACTGAGGCTGCGCTGCCCCGGAGGCCTTACTGCTTGGTGTGAGACTGCCAGCTCAG  
AGTGCCCGTCAGGGCCTGTGCATCCGCACGCGGAGCCGTCTGTTAGGAGCTTCAGAGTGTCTCTCGAC  
ACTGCCAGCCCCGTGTTAGCACCTGGGCCTCAGTCCCACTTGCTCCCAGGCGCCGGTTCTGTGGTTGGTT  
TGGAATTAAAGTCCTGTTTGAAGTTGTCAGACACAGACATGAATTTCTGGGCGCTCCCTGAGTCAGAGTC  
TCAGAAGACCTGTGCAGGCTGGCGTGAGAGGAGCGGCAGCCACACTGCGGCCCCACGCCAAGGACTGGG  
CTGCTCTCGAGGGGGGCGCGCCACCGCTGTGTCCTCTCTGCCAGCCTGGCTTACCAAGGGCTACCTCA  
GTGGGAGATGAGGTTGGAGGAACGAAGGCGAGGTTCTCCTTGCTTTGGGGAGAAAAGTATTCAGGAAGT  
GGGTGTGTGGGAAACCTGAAGATGGCGTGACAGGACACAGCGTGGGCGGCCTGGGCAGAAGGGCGGCTG  
GCTGTCCTGGAGCTGCTGCTGGAGCCTGCCCTCAGAGTGTCCCTTCCAGTGCTGTGGCATTCTGTGGCA  
GCTTCCCCAGGTGTGGTGACGGGGGGGGGGCGGGGCCTCCACCTGTGACAGCCAGGCTTGAGGGTGGACG  
GCGTGCCTCTCCAGGAGCCTTCCCCATGTCCTTGCTTGCTGAGAATTGCCCTCCCATGCCGCTGAGGT  
GTTAGGTGGTTTAGGGCCAAAAGGGGAAAACCACTTGAGTCTTGTGGTGTGTGGTGGGCAGACACCACAG  
GGTGGCATCACCTGGTGGCATTTCAGAACCTCAGCCCCGATTCCAGCACCCACCACCGCCTGACCCTGT  
GTAACCTGCTGTCCCGGTCCCAGAGTGCACTCTGCCCCGCTGCTCTGCTGCCTGTCCTGGGAAAGTATC  
TTTGCCCCACTAGGAAATGTAAACAGGAGGGCTTGGGGAGCGTGGGCACTTTTCTCATGAGCAGCTACTG

CGGCGTTGGCAGGACTCGCTGCTGCTGCTGCTGCTTGTGTAGGTCGGGGAGCCAGAGATCCCCGAGGACG  
CGCGCCGGACAGTCGGCACTGACCGGCCACCTGGTAGCAGAGGACACCCCCAGCCCCCAAGCATTGAA  
GACATAGTGTATTTCCTCGTATCCTTTCTCCCTTGGGTGTAGTTGGGGTGGGGAAGCAGGGAAGGCTGGT  
GCGATCTCCATTCTTGGGCTCCACGTCCGAGTTCATGGTGCGCCGCTGTGCTGGGAGCTGCAGTGGTAA  
TGTGTGGGACACCTTGACCAAAGGGGAGCTTTGTCTCGTGTGTTTTGAAAAGGCTTAATGAAGAGAATG  
TTGTTCACTCTTAGTAGTATAGTTTGCAATTCTTAATGGCAAATAATAAGTTTCAGTAGAAAACAAA

>NM\_032852.4 Homo sapiens autophagy related 4C cysteine peptidase (ATG4C), transcript variant 1,  
mRNA

AAAGTACCTGTAGCTGCGGCGCTGAGGTCGGAACGTCTGCGTGTGTGCGGGCTGGTTTTGTGGCGGCTGC  
TGCTAGAGCTGGAGCATTTGCCGGGTTGGTGGCTCCTGCACATTTTACAGTTCTCCAGTCCTTCTCTTT  
CGTCAGTATAAAAGATTAACTCTACAGAAGAATGCAATCAAGTGATGGCTTTTCCTTTAGAATTTGAAT  
ATGGAGGCTACAGGAACAGATGAAGTTGACAAGCTAAAAACCAATTTATATCTGCTTGGAAACAACATGA  
AATATAGTTGGGTGTTGAAAACAAAGACGTATTTTAGTAGAAATTCTCCTGTATTATTGCTTGGAAAATG  
TTACCATTTTAAATATGAAGATGAAGATAAACGTTACCTGCAGAGTCGGGATGTACAATAGAGGATCAC  
GTAATTGCAGGAAATGTAGAAGAATTCGTAAAGATTTCAATTTCTAGAATATGGCTGACCTACAGGGAAG  
AATCCCTCAAATAGAAGGCTCAGCTTTGACAACAGACTGTGGGTGGGGCTGCACATTGAGAACTGGCCA  
GATGCTCTTGGCTCAAGGACTCATACTACACTTTCTTGGTAGAGCTTGGACCTGGCCTGATGCTTTGAAT  
ATTGAAAATTCAGACTCTGAATCATGGACTTCCCACACTGTCAAAAAATTTACTGCATCATTTGAAGCAT  
CACTTTCAGGGGAAAGAGAATTCAAAACCCCAACAATTTCTCTGAAGGAAACAATTGGGAAATATTCTGA  
TGATCATGAAATGCGAAATGAAGTTTATCATAGGAAATCATCTCTTGGTTTGGTGATTCCCCCTTGGCT  
CTTTTGGCTTACATCAACTAATAGAATATGGAAAGAAGTCTGGGAAAAAGCAGGAGATTGGTATGGAC  
CAGCTGTGGTTGCTCACATTTTAAGAAAAGCAGTTGAAGAAGCAAGGCATCCTGATTTACAAGGAATAAC  
TATTTATGTTGCACAAGATTGTACAGTTTACAATTCTGATGTAATTGATAAACAGAGTGCTTCCATGACT

TCTGATAATGCAGATGACAAAGCTGTTATTATTCTAGTTCCTGTTAGACTTGGTGGAGAAAGAACCAACA  
CCGACTACTTAGAATTTGTGAAGGGTATTTTAAGCCTGGAATATTGTGTGGGTATTATTGGTGGCAAACC  
TAAACAGTCATATTACTTTGCTGGATTTCAAGATGACAGTTTGATTTACATGGATCCTCATTACTGCCAA  
TCTTTTGTAGATGTCAGCATAAAGGATTTCCCTCTTGAGACATTCCACTGCCCTTCTCCCAAAAAGATGT  
CTTTTCGAAAAATGGATCCCAGCTGTACAATAGGATTTTACTGTGAAATGTTCAGGACTTCAAACGAGC  
TTCTGAAGAAATCACCAAGATGCTGAAATTTTCTTCTAAGGAGAAATATCCCTTATTTACTTTTGTAAT  
GGTCATTCCAGAGACTATGATTTTACATCTACTACAACCAATGAAGAAGACCTTTTTTCAGAGGATGAAA  
AGAAACAATTAAAAAGATTTAGCACGGAAGAGTTTGTCTTGCTTTAAAGATTAGCACATTTGTGCTTGAT  
AAGAAGAATTCCATTGAAAGGGGAAAAATGAAGAGAAACAAGTATATCTGAAATGTTTATTTTCACAAAT  
ATCTTAATTTTATATGTTCTTTAAAAAAGAACATTTGAAAAATATAACAGTTAAAGATATTTTCTAAAAG  
AGAAATGATTTAATGAATCTTGCTTTCTAATAAATAAATTGAGTGATTCTGGTTGCATTCTTATTTCCCT  
AAGATCTACTAGTGATAATTCTACCTTAAGCTTTTAGTCTTCAAAGTCTTCCACCTGAGCCCA  
TTGTTCTCATGGAGGTTTTGTGATATTAACCCTCCCCAAAGACTGGGATCACCAAATAGTTTCAAAT  
CTCAGTTTGTACTGAAGACCAGAAGATCAGAGAAGGAACTTTAATGCTGTCTAGCCTCTGCTATTAAT  
GCAATCAAAGAATACTTTTGCATATGTCTTGATAATTAAATAGTATTTGTAACTGTGATATGCATACAC  
TTATATAAGCAGAATTATGAGTTAAAGTAATACTTAGCAATATGATTTTATAATGGCTCCTCATTATGCT  
TGCTGTTGAACCTTTTATGAGGAGTGAATATAAAGTATTGGTTTTCCCTCACAAATTTAAAGATTATGTT  
ATTAATACTATTATAACTGCATCAATCAAGTCAGATAAAGGCAACTATAAAATAGTAGTAGTGTTTGTTT  
CCTATCTCAAGGGCGAAATTTTATGGGAACTCAATTTATTATGCAGTTTTTAAGTTTAAATACCAAGAA  
AGATGTCAGTAGATTCTCTTCTATGTGATTTTTGTTTTTATATAAAGCAGTGAGTGGTGTTTAGAAGC  
TGAGGCCACCTGTAAGGCAAATCTGCCTTAAGTGTATTATGTGTTACTTAAAGGCAAATTTGTGATCTAA  
AAGTACAAGAGTGATTTTTGAGCTAGGATTATAAAATACATAATAAAGATGTGAGAAGATAAAATGCTTT  
TGTTTTGGTTTTAATGTTGGGATTATTTAATCCTTTCATTTGAAAAATCAGTGTCTCAAATGAATTCTG  
TTCATTTATAATAAATGCATATATTGCTCTGAAAACAATATTAATTTTTTTAAGTGGAGCTTTCATGTTT  
CAGTGTAGAAACGTGACTTATAAAGACATAAAATTGTGTATCATCTAAAGTCATTGATCTCTCCATCAG

AAAACCTGTTTGTAGAGTTGCATGTAAAGCTGAAAGAGAGGGTGGGCGGATTGTTTTAGTATACCTGA  
TGAGAAAAATCAGGTTTGACATTTCTCAGTGAAGATTACTACTGAGTTGAAATAAATAGTCTGAAATCT  
AAAA

>NM\_032885.6 Homo sapiens autophagy related 4D cysteine peptidase (ATG4D), transcript variant 1,  
mRNA

GTCCTGGCCCGCTAAGATGGCGATGGCTGCGGTAGCAGCGGCGGCGGCTGTTGCCTGGCCCGGTACCTG  
GGGACGGGGGCGGAGTAGCGCCTTCCCCGGGCCCCGTGAACCGGCTGCGGGTCGCCCTTGGGGGGCAGCG  
GCCGCAGCCCCCACCTGGGCCCTCGGTCCGCCCTCCCGGCGCGTCCATGAACTCAGTGTGCGCGGCCGC  
CGCGCAGTACCGGAGCAGCAGCCGGAGGACGCGCGCCGCCGGCCCCGAGGCCCGCAGGCCGCGGGGTCCC  
AGAGGCCCAGACCCCAACGGCCTGGGGCCTTCCGGAGCCAGCGGCCCCGCTCTTGGCTCTCCCGGGGCTG  
GCCCCAGTGAGCCGGACGAAGTGGACAAGTTCAAGGCCAAGTTCTGACAGCCTGGAACAACGTCAAGTA  
CGGTTGGGTGGTTAAAAGCCGGACCAGCTTTAGCAAGATCTCCAGCATCCACCTCTGTGGCCGCCGCTAC  
CGTTTCGAGGGCGAGGGTGACATACAGCGTTTCCAGCGGGACTTTGTGTCCCGCCTGTGGCTCACATACC  
GCCGGGACTTCCCGCCCCTTCTGGGGGCTGCCTGACCTCGGACTGTGGCTGGGGGTGCATGTTACGCAG  
CGGCCAGATGATGCTGGCACAGGGCCTTCTGCTGCATTTCTGCCAGAGACTGGACATGGGCCGAGGGC  
ATGGGCCTGGGCCCCCCTGAGCTGTCAGGGTCAGCCTCTCCAGCCGGTACCATGGGCCTGCCCGCTGGA  
TGCCCCACGCTGGGCCCAGGGTGCCCCTGAGCTGGAGCAGGAACGCCGGCACCGGCAGATTGTGTCCTG  
GTTGCGCGACCACCCCGGGCCCCCTTGGCCTACACCGGCTGGTGGAGCTTGGGCAGAGCTCAGGCAAG  
AAGGCAGGTGACTGGTATGGGCCATCGCTAGTGGCACACATCCTCAGGAAAGCCGTGGAGAGCTGCTCCG  
ACGTACCCGCCTGGTGGTGTACGTTTCTCAGGACTGCACAGTGTACAAGGCGGATGTGGCACGCCTGGT  
GGCCAGGCCAGACCCACAGCCGAGTGGAAGTCTGTGGTCATCCTGGTGCCCGTGCGACTGGGTGGCGAG  
ACTCTCAACCCCGTGTATGTGCCCTGCGTGAAGGAACTCCTGCGTTGCGAGCTGTGCCTGGGCATCATGG  
GTGGGAAACCGCGACACTCACTGTACTTCATTGGCTACCAAGATGACTTCCTGCTGTACCTGGACCCTCA

CTACTGCCAGCCCACTGTGGATGTCAGCCAGGCCGACTTCCCCCTGGAGTCCTTCCACTGCACCTCGCCC  
CGCAAGATGGCCTTTGCCAAGATGGACCCAAGCTGTACCGTGGGCTTCTATGCTGGAGACAGGAAGGAGT  
TTGAGACACTCTGCTCAGAGCTGACCAGGGTCCTCAGCTCCTCCTCAGCCACAGAGCGGTACCCCATGTT  
CACCTTGGCCGAGGGCCATGCTCAGGACCACAGCCTGGACGACCTCTGCTCCCAGCTCGCCCAGCCCACA  
CTCCGGCTCCCTCGCACAGGGCGGCTCCTCAGGGCCAAACGCCCCAGCTCTGAGGACTTTGTGTTTTTAT  
AAAGGGAGGGGATGAGGGGAAAGATACAACACTATTTATTTTTTTATTTATGTCATGTCGGGTGTGGGAT  
CTTGAGCTCTGGCAGTGATGATGGTACTTCTGTTGTCAGCCCCTCAAGCCCAGCTGCAACCAGTCTGGG  
GCCATTCAGCCAGGGACAGAGCCCACAGAGCCCATACACCTGTCTCCCACCAGCGGGGGCCCTCCTGGCAG  
GGTAGGGAAGGAGGACCCCGGGCACCCCCCTCAGGGCCTGACTCACGTAAGTGTAGTTTGCAGTGGACGCC  
CGGGCCCTCCCTGTCCCAAAGCCCCCTTGGGGGAAGTGTGGCTGCTGGGGGCCAATAAAGCTGTGTAAGT  
TGA

>NM\_004849.4 Homo sapiens autophagy related 5 (ATG5), transcript variant 1, mRNA

AGCGTTGCCGTTGTATTCGCTGGATACCAGAGGGCGGAAGTGCAGCAGGGTTCAGCTCCGACCTCCGCG  
CCGGTGCTTTTTGCGGCTGCGCGGGCTTCTGGAGTCCTGCTACCGCGTCCCCGCAGGACAGTGTGTCAG  
GCGGGCAGCTTGCCCCGCGCCCCACCGGAGCGCGGAATCTGGGCGTCCCCACCAGTGCGGGGAGCCGGA  
AGGAGGAGCCATAGCTTGGAGTAGGTTTGGCTTTGGTTGAAATAAGAATTTAGCCTGTATGTACTGCTTT  
AACTCCTGGAAGAATGACAGATGACAAAGATGTGCTTCGAGATGTGTGGTTTGGACGAATTCCTCACTGT  
TTCACGCTATATCAGGATGAGATAACTGAAAGGGAAGCAGAACCATACTATTTGCTTTTGCCAAGAGTAA  
GTTATTTGACGTTGGTAACTGACAAAGTGAAAAAGCACTTTCAGAAGGTTATGAGACAAGAAGACATTAG  
TGAGATATGGTTTGAATATGAAGGCACACCACTGAAATGGCATTATCCAATTGGTTTGCTATTTGATCTT  
CTTGCACTCAAGTTCAGCTCTTCCTTGGAAACATCACAGTACATTTTAAGAGTTTTCCAGAAAAAGACCTTC  
TGCACTGTCCATCTAAGGATGCAATTGAAGCTCATTTTATGTCATGTATGAAAGAAGCTGATGCTTTAAA  
ACATAAAAGTCAAGTAATCAATGAAATGCAGAAAAAAGATCACAAGCAACTCTGGATGGGATTGCAAAAT

GACAGATTTGACCAGTTTTGGGCCATCAATCGGAACTCATGGAATATCCTGCAGAAGAAAATGGATTTCT  
GTTATATCCCCTTTAGAATATATCAGACAACGACTGAAAGACCTTTCATTACAGAAGCTGTTTCGTCCTGT  
GGCTGCAGATGGACAGTTGCACACACTAGGAGATCTCCTCAAAGAAGTTTGTCTTCTGCTATTGATCCT  
GAAGATGGGGAAAAAAGAATCAAGTGATGATTCATGGAATTGAGCCAATGTTGGAAACACCTCTGCAGT  
GGCTGAGTGAACATCTGAGCTACCCGGATAATTTTCTTCATATTAGTATCATCCACAGCCAACAGATTG  
AAGGATCAACTATTTGCCTGAACAGAATCATCCTTAAATGGGATTTATCAGAGCATGTCACCCTTTTGCT  
TCAATCAGGTTTGGTGGAGGCAACCTGACCAGAAACACTTCGCTGCTGCAAGCCAGACAGGAAAAAGATT  
CCATGTCAGATAAGGCAACTGGGCTGGTCTTACTTTGCATCACCTCTGCTTTCCTCCACTGCCATCATT  
AACCTCAGCTGTGACATGAAAGACTTACCGGACCACTGAAGGTCTTCTGTAAAATATAATGAAGCTGAAA  
CCTTTGGCCTAAGAAGAAAATGGAAGTATGTGCCACTCGATTTGTATTCTGATTAAACAAATAAACAGGG  
GTATTTCTAAGGTGACCATGGTTGAACTTTAGCTCATGAAAGTGGAACATTGGTTTAATTTTCAAGAG  
AATTAAGAAAGTAAAAGAGAAATTCTGTTATCAATAACTTGCAAGTAATTTTTGTAAAAGATTGAATTA  
CAGTAAACCCATCTTTCCTTAACGAAAATTTCTATGTTTACAGTCTGTCTATTGGTATGCAATCTTGTA  
ACTTTGATAATGAACAGTGAGAGATTTTTAAATAAAGCCTCTAAATATGTTTTGTCATTTAATAACATAC  
AGTTTTGTCACTTTTCAAGTACTTTCTGACTCACATACAGTAGATCACTTTTTACTCTGTGTTACCATT  
TGACTGGTCGTCATTGGCATGGGGTGGATATAGGGCATAGGATTACTTGTCTCAGAAGCTGTCATAGAAT  
TTCTTGCTGCCAATTAAAAAACCTGTGTTCTTTACACACTACACGTATAAATATTGTAAGTGTTCATCTT  
TGTTGTTTTATCACTGTAAGCCTGTCAAATCATAGTATCCTAAGCATCTGTAAATGCTAATTTTGCATTT  
TTGGAAAAACCCATTCCTTCCAAGCTAGTGTTTTTCATTGGCTCCAGGTCTAATTTTTCACTGTGGTCCC  
TGGCAGCCAGTCTTTTGAAGTTTAAAGATTACCTGTCTCTTGACTGCAGTACCTTTTCTTTAATTTTTAC  
CAAAAATATCCAGAGGTTACTGGAGTTCTTATTCAATATAAGGAAAGTTTGCTGCACCTTTATTACCAAGC  
CTCTGGGATTTTACCAGTCAAACATATTTGTGCATTACATTTCAATTTCTTGAGCTAGCTGGCTGTCCA  
TATTGAATGTTGACCCATTTGAGTACGCTAAAAGGCTTACAGTATCAGACACGATCATGGTTTTAGATCC  
CATAATAAAAATGAATGTTTTTCTTATAAAAAATTATACAAATGCTGAAGTGAGATTCTACTATTGTTCA  
TTGCTTCCTTTTCTTTTCTTTTGCATTTTCACTGATTAATAGCACATTTCTTCACAAAATTAGATAA

AGTTGGTCAAAGACCAGATATTCTGGAATGGAAATTGTAAAGCTTAATCAAAAAGAATAGCCAGTACAGC  
ATACAATCTCAGAACTTAGAAGCAAGTAGAAAATAATTGGTTGATGTAAACGAAAGTGCCATTTTAGTA  
AAGGCAGGAAAAAATAGCAATATTTGAGTTATGTAAGGATAAAAAATCCACTGACTTGTATTTTTGCAC  
AAGAGGCTGGTCTGAATATGATTGTTACATTAAGAGTGTTTATTCGTCGGTTCATTTTGGGGATTTTCC  
CCCTTGATGTTTTGACAGATTGAAGTGAGCTTTAGTGAGCAAAAGGATCAGAATGCAGGGAACACTAAGC  
TGTGATGAAGAAAGTGTTGTAAGGCCAGAGTAGTTTTATACAGACAAAACCAGTGTCAGGCCTTTGCA  
GTAGGCTTGAGTGAACCTTCTGATCTAGATTTGAAAGTAAATTTTATGAAGACATTGCCCCATTTTACTTC  
CTCATTCAATTATTGTACCAGCATCATAGCTTTATTACTCTAATCCCAGGTAAGTCAAGCCTACAATGCCC  
TAGAGGAAGAGTAAAACCAGAAATTCATGCTGGCTTAAATAATCTATTTTTGTTCTTTTCATTTGAATA  
TTTAAATTTTATGGTTTATTAATAAATTAATAAAA

>NM\_004849.4 Homo sapiens autophagy related 5 (ATG5), transcript variant 1, mRNA

AGCGTTGCCGTTGTATTCGCTGGATACCAGAGGGCGGAAGTGCAGCAGGGTTCAGCTCCGACCTCCGCG  
CCGGTGCTTTTTGCGGCTGCGCGGGCTTCTGGAGTCTGCTACCGCGTCCCCGCAGGACAGTGTGTCAG  
GCGGGCAGCTTGCCCCGCCGCCCCACCGGAGCGCGGAATCTGGGCGTCCCCACCAGTGCGGGGAGCCGGA  
AGGAGGAGCCATAGCTTGGAGTAGGTTTGGCTTTGGTTGAAATAAGAATTTAGCCTGTATGTACTGCTTT  
AACTCCTGGAAGAATGACAGATGACAAAGATGTGCTTCGAGATGTGTGGTTTGGACGAATTCCTCACTTGT  
TTCACGCTATATCAGGATGAGATAACTGAAAGGGAAGCAGAACCATACTATTTGCTTTTGCCAAGAGTAA  
GTTATTTGACGTTGGTAACTGACAAAGTGAAAAAGCACTTTCAGAAGGTTATGAGACAAGAAGACATTAG  
TGAGATATGGTTTGAATATGAAGGCACACCACTGAAATGGCATTATCCAATTGGTTTGCTATTTGATCTT  
CTTGCACTCAAGTTCAGCTCTTCCTTGGAACATCACAGTACATTTTAAGAGTTTTCCAGAAAAAGACCTTC  
TGCACTGTCCATCTAAGGATGCAATTGAAGCTCATTTTATGTCATGTATGAAAGAAGCTGATGCTTTAAA  
ACATAAAAGTCAAGTAATCAATGAAATGCAGAAAAAAGATCACAAGCAACTCTGGATGGGATTGCAAAAT

GACAGATTTGACCAGTTTTGGGCCATCAATCGGAACTCATGGAATATCCTGCAGAAGAAAATGGATTTCT  
GTTATATCCCCTTTAGAATATATCAGACAACGACTGAAAGACCTTTCATTACAGAAGCTGTTTCGTCCTGT  
GGCTGCAGATGGACAGTTGCACACACTAGGAGATCTCCTCAAAGAAGTTTGTCTTCTGCTATTGATCCT  
GAAGATGGGGAAAAAAGAATCAAGTGATGATTCATGGAATTGAGCCAATGTTGGAAACACCTCTGCAGT  
GGCTGAGTGAACATCTGAGCTACCCGGATAATTTTCTTCATATTAGTATCATCCACAGCCAACAGATTG  
AAGGATCAACTATTTGCCTGAACAGAATCATCCTTAAATGGGATTTATCAGAGCATGTCACCCTTTTGCT  
TCAATCAGGTTTGGTGGAGGCAACCTGACCAGAAACACTTCGCTGCTGCAAGCCAGACAGGAAAAAGATT  
CCATGTCAGATAAGGCAACTGGGCTGGTCTTACTTTGCATCACCTCTGCTTTCCTCCACTGCCATCATT  
AACCTCAGCTGTGACATGAAAGACTTACCGGACCACTGAAGGTCTTCTGTAAAATATAATGAAGCTGAAA  
CCTTTGGCCTAAGAAGAAAATGGAAGTATGTGCCACTCGATTTGTATTCTGATTAAACAAATAAACAGGG  
GTATTTCTAAGGTGACCATGGTTGAACTTTAGCTCATGAAAGTGGAACATTGGTTTAATTTTCAAGAG  
AATTAAGAAAGTAAAAGAGAAATTCTGTTATCAATAACTTGCAAGTAATTTTTGTAAAAGATTGAATTA  
CAGTAAACCCATCTTTCCTTAACGAAAATTTCTATGTTTACAGTCTGTCTATTGGTATGCAATCTTGTA  
ACTTTGATAATGAACAGTGAGAGATTTTTAAATAAAGCCTCTAAATATGTTTTGTCATTTAATAACATAC  
AGTTTTGTCACTTTTCAAGTACTTTCTGACTCACATACAGTAGATCACTTTTTACTCTGTGTTACCATT  
TGACTGGTCGTCATTGGCATGGGGTGGATATAGGGCATAGGATTACTTGTCTCAGAAGCTGTCATAGAAT  
TTCTTGCTGCCAATTAAAAAACCTGTGTTCTTTACACACTACACGTATAAATATTGTAAGTGTTCATCTT  
TGTTGTTTTATCACTGTAAGCCTGTCAAATCATAGTATCCTAAGCATCTGTAAATGCTAATTTTGCATTT  
TTGGAAAAACCCATTCCTTCCAAGCTAGTGTTTTTCATTGGCTCCAGGTCTAATTTTTCACTGTGGTCCC  
TGGCAGCCAGTCTTTTGAAGTTTAAAGATTACCTGTCTCTTGACTGCAGTACCTTTTCTTTAATTTTTAC  
CAAAAATATCCAGAGGTTACTGGAGTTCTTATTCAATATAAGGAAAGTTTGCTGCACCTTTATTACCAAGC  
CTCTGGGATTTTACCAGTCAAACATATTTGTGCATTACATTTCAATTTCTTGAGCTAGCTGGCTGTCCA  
TATTGAATGTTGACCCATTTGAGTACGCTAAAAGGCTTACAGTATCAGACACGATCATGGTTTTAGATCC  
CATAATAAAAATGAATGTTTTTCTTATAAAAAATTATACAAATGCTGAAGTGAGATTCTACTATTGTTCA  
TTGCTTCCTTTTCTTTTCTTTTGCATTTTCACTGATTAATAGCACATTTCTTCACAAAATTAGATAA

AGTTGGTCAAAGACCAGATATTCTGGAATGGAAATTGTAAAGCTTAATCAAAAAGAATAGCCAGTACAGC  
ATACAATCTCAGAACTTAGAAGCAAGTAGAAAATAATTGGTTGATGTAAACGAAAGTGCCATTTTAGTA  
AAGGCAGGAAAAAATAGCAATATTTGAGTTATGTAAGGATAAAAAATCCACTGACTTGTATTTTTGCAC  
AAGAGGCTGGTCTGAATATGATTGTTACATTAAGAGTGTTTATTCGTCGGTTCATTTTGGGGATTTTCC  
CCCTTGATGTTTTGACAGATTGAAGTGAGCTTTAGTGAGCAAAAGGATCAGAATGCAGGGAACACTAAGC  
TGTGATGAAGAAAGTGTTGTAAGGCAAGAGTAGTTTTATACAGACAAAACAGTGTCAGGCCTTTGCA  
GTAGGCTTGAGTGAACCTTCTGATCTAGATTTGAAAGTAAATTTTATGAAGACATTGCCCATTTTACTTC  
CTCATTCAATTATTGTACCAGCATCATAGCTTTATTACTCTAATCCCAGGTAAGTCAAGCCTACAATGCCC  
TAGAGGAAGAGTAAAACAGAAATTCATGCTGGCTTAAATAATCTATTTTTGTTCTTTTCATTTGAATA  
TTTAAATTTTATGGTTTATTAATAAATAAATAA

>NM\_006395.3 Homo sapiens autophagy related 7 (ATG7), transcript variant 1, mRNA

AGAGAGAGCTGTGGTTGCCGGAAGTTGAGCGGCGGCAAGAAATAATGGCGGCAGCTACGGGGGATCCTGG  
ACTCTCTAAACTGCAGTTTGCCCTTTTAGTAGTGCTTGGATGTTGGGTTTTGGCATGAGTTGACCCAG  
AAGAAGCTGAACGAGTATCGGCTGGATGAAGCTCCAAGGACATTAAGGGTTATTACTACAATGGTGACT  
CTGCTGGGCTGCCAGCTCGCTTAACATTGGAGTTCAGTGCTTTTGACATGAGTGCTCCACCCCAGCCCCG  
TTGCTGCCCAGCTATTGGAACACTGTATAACACCAACACACTCGAGTCTTTCAAGACTGCAGATAAGAAG  
CTCCTTTTGGAACAAGCAGCAAATGAGATATGGGAATCCATAAAATCAGGCACTGCTCTTGAAAACCTG  
TACTCCTCAACAAGTTCCTCCTTGACATTTGCAGATCTAAAGAAGTACCACTTCTACTATTGGTTTTG  
CTATCCTGCCCTCTGTCTTCCAGAGAGTTTACCTCTCATTGAGGGGCCAGTGGGTTTGGATCAAAGGTTT  
TCACTAAAACAGATTGAAGCACTAGAGTGTGCATATGATAATCTTTGTCAAACAGAAGGAGTCACAGCTC  
TTCCTTACTTCTTAATCAAGTATGATGAGAACATGGTGCTGGTTTCCTTGCTTAAACACTACAGTGATTT  
CTTCCAAGGTCAAAGGACGAAGATAACAATTGGTGTATATGATCCCTGTAAGTACCCAGTACCCTGGA

TGGCCTTTGAGGAATTTTTTGGTCCTAGCAGCCACAGATGGAGTAGCAGTTTCCAGTCTGTTGAAGTTG  
TTTGCTTCCGTGACCGTACCATGCAGGGGGCGAGAGACGTTGCCACAGCATCATCTTCGAAGTGAAGCT  
TCCAGAAATGGCATTAGCCAGATTGTCCTAAAGCAGTTGGATGGGAAAAGAACCAGAAAGGAGGCATG  
GGACCAAGGATGGTGAACCTCAGTGAATGTATGGACCCTAAAAGGTTAGCTGAGTCATCAGTGGATCTAA  
ATCTCAAACCTGATGTGTTGGAGATTGGTTCCTACTTTAGACTTGGACAAGGTTGTGTCTGTCAAATGTCT  
GCTGCTTGGAGCCGGCACCTTGGGTTGCAATGTAGCTAGGACGTTGATGGGTTGGGGCGTGAGACACATC  
ACATTTGTGGACAATGCCAAGATCTCCTACTCCAATCCTGTGAGGCAGCCTCTCTATGAGTTTGAAGATT  
GCCTAGGGGGTGGTAAGCCCAAGGCTCTGGCAGCAGCGGACCGGCTCCAGAAAATATTCCCCGGTGTGAA  
TGCCAGAGGATTCAACATGAGCATACTATGCCTGGGCATCCAGTGAATTCTCCAGTGTCACTCTGGAG  
CAAGCCCGCAGAGATGTGGAGCAACTGGAGCAGCTCATCGAAAGCCATGATGTCGTCTTCTATTGATGG  
ACACCAGGGAGAGCCGGTGGCTTCTGCCGTCAATTGCTGCAAGCAAGAGAAAGCTGGTCATCAATGCTGC  
TTTGGGATTTGACACATTTGTTGTCATGAGACATGGTCTGAAGAAACCAAAGCAGCAAGGAGCTGGGGAC  
TTGTGTCCAAACCACCTGTGGCATCTGCTGACCTCCTGGGCTCATCGCTTTTGGCAACATCCCTGGTT  
ACAAGCTTGGCTGCTACTTCTGCAATGATGTGGTGGCCCCAGGAGATTCAACCAGAGACCGGACCTTGA  
CCAGCAGTGCACTGTGAGTCGTCCAGGACTGGCCGTGATTGCAGGAGCCCTGGCCGTGGAATTGATGGTA  
TCTGTTTTGCAGCATCCAGAAGGGGGCTATGCCATTGCCAGCAGCAGTGACGATCGGATGAATGAGCCTC  
CAACCTCTCTTGGGCTTGTGCCTCACCAGATCCGGGGATTCTTTACGGTTTGATAATGTCCTTCCCGT  
CAGCCTGGCATTGACAAATGTACAGCTTGTCTTCCAAAGTTCTTGATCAATATGAACGAGAAGGATTT  
AACTTCCTAGCCAAGGTGTTTAATTCTTCACATTCCTTCTTAGAAGACTTGACTGGTCTTACATTGCTGC  
ATCAAGAAACCCAAGCTGCTGAGATCTGGGACATGAGCGATGATGAGACCATCTGAGATGGCCCCGCTGT  
GGGGCTGACTTCTCCCCGGCCGCTGCTGAGGAGCTCTCCATCGCCAGAGCAGGACTGCTGACCCAGGC  
CTGGTGATTCTGGGCCCCCTCCATACCCCGAGGTCTGGGATTCCCCCTCTGCTGCCAGGAGTGGCC  
AGTGTTGCGCGTTGCTCGGGATTCAAGATAACCACCAGTTCAGAGCTAAATAATAACCTTGGCCTTGGCCT  
TGCTATTGACCTGGGACTTGGTCCTCCATGCAGTTTTTATTTCTTGTCACAGTGACTGATAGCCATCCCC  
CAGGATCCTTCCCCCTTGGCCCTGAGGGGGTGACCCAACACAGACCAAATGGGGAAATGAGCAACCAGCT

CCTGCCCAGAGCCACTGCGGGAGGTGGCACCCCTCATCCCCGGAATGTGCTGCCCACCGCACCGCAGGCTC  
CTCCTGTGGGGGCCCTGGGCATGGGTGAGGGTGGGACCCCGTGAGCGCACTGCACCCTGGCCCTGGTGGA  
GCGGGAGGAGGAGGAGAGCCGAGCTGGGTACGAGACTAAAGGGCCCACATGACCCAGTGACGCCAGATT  
CCACCAAGGACTGAGTGAGCTGCTCAGACATGGCTTTCTGCCTCCCAGCCTGTCCTCCACTGTGGGCATA  
GCATCTGTGCCTGCCTGCCTGCTTGAGGGAGAGGAGTTTCTGCTGCTGCCTTGAGCTGGGGGGAAGAGCC  
CAGGGGCAGATCCTGGCAGCTGCCTGGATGGGGCTCCTCCCTGCCCTTATGAGCAGGCCAGGCCAGAAA  
GGCCGAGCCTGGGCTGCCTTCTGCCCCAGCCGAGGGAGGGGTGAGACGGCTCTACCATGGGTAAGTACAG  
GCAAGAGCTGGTTTTCTCTTTATTCTGGGTGTGTGCAGCTGTGAGGCCCCAACCCAGGAGAGGCCATGG  
CCTAGGTACCTGTGACCACCCTGCCCCGTGTAGAGGGCATCGTCTTCTGCTATTTTATTCTTTACAGC  
TTTTGTCTTAGGCCCAGAATCAAAGTGAAAATTGAGTCGAGCTGACCCTTACAACAGTAGGATTTAGTAG  
GGTAGATTTCAAATGAGGCTTCGCTTCTCCCAAAGTAGCCAGTCCAAGTCCAGTGGCTGTCGTTACAGT  
CATGGGAGCTTCATGGGGACACAGCCGGCACAGGTGCAGGGCCCGAGTCCGCCCACCCAGCCTGGCGCTG  
AAACTGCACACGTACACTATGTGGTTAAGAGCACTTTATTATTGTTCTTAAGGCTACTTTTAAGTACAA  
AAAAAGATGGCCTGCCAAACCTTTTTTTTTCTTCTCCAGGAAAAACAGGCCACAGAGAATGGTATATTA  
CAGATTTACACACATGAAGAGAAGGTCAGAGCGCACTGCAGGCAGCGCGGCTCTGGGAAGAACTTCACGG  
AGCCCCCTCTTAGAGCAGGGAGGGGGCTTCTCAGTGAAATGTTTGGTTTTCTGCTGCCTCCTCTGCCCC  
AGGCCCCCCTCCAGGGTACTGCCTATCCCAGATAGGTGAGTGCACCAGGGACCCGGCCGCCAGCACCGCC  
GACCCCTCCCAGAGTGACGCCCTTGTTCACTGACAAAGAGACCTGTCCAGGAGTGTCTCCACCGAGCC  
GGTCAGCTGTGGGTGGTTTTCTGTTACGACGCTCAGTAGCCTGTAGCAATAACAACTCGTGGCTATGA  
ATGCAGATGCAGTGTTCTCATAGAATAACTGTTCTGCACTTTTACAGACAAATCTACGACAAAAAAAAA  
GATCAACTTTTTTTTTCCGAACAACAAAAAAATGAATGATTACAATAGGAAAGGGAAAAATTAATAGC  
TACATATCATTAACAAATTAATGTTCTTCAAAAAATACCTACAAATTTCTCTGTACATTCTTTACGCACA  
GCGTAACGATGGTCTCAAAATCACCCATATAGAAAAGTGTTCTCAACGATTTTCTACAGAAAAATATAG  
GGGCCTGAATGCCAAAGCTTGGAAGCCCAGTACAGTGGGAGTGAAATGTGTGCGGGGCAAGGAGAAGGGC  
TTTTCTTCTCCTCACTTTTCAAAGGCCTGCAGCCACTCTGTGACTACAAGAGCCAGTCTCCGACCTTTT

CACCCAGTGCCAATTTCCAAAATTCAACAGCTAAAAACTGTAAAACCGGGGGTCATACGGTGTGCAGAGT  
CCACAAAGCCTTGACAGGTGAGGTGACCACGCCCACGTACCTGGTCAGGTGCCATCGTCGTGAGCCTCTG  
GTGGGCCAGGTGGGACACAGCACACCCCAGGGGGAGGGGATAGAAACGCTCATTGACCAAAAAGGAGCAG  
CTGTGACCTCCACAGCTGTGTCTGTCATGCTTGCTTCATCTAATTTCTAGTTAGTAGCTATTAATATAGC  
AAATAATAAATGCAGTAATAACAGTATAAAGTCAGAGGAATGTATACTGCCTTGGCCCCAGCGTACGAGG  
AAGCGTATAAAACACCATATCACAGATTGTCTGTCAGTAATCTGCTGTTGAGCCAAGAGAGTTCAAAGGG  
AGCAGTTTCTGCATGTAGGGAAGTTGGAAGACACAAACCCACCTCCCCTGGGAGCTTGTAACAAAGCAG  
ACAGGGATGCAAAAATAAATGATGTCAGCCTGCAGCCAACTCCAGCATCCCACACCGCAGCTGACCCAC  
TGCTCATCGCGAGGGCCTGCCAGGAGCTGGCCTCCCGCACTACTTGTGAGTAAAGTGAATATCAAATACC  
AATCTTAGAGTACAACGTACCAGCAGTAAGTATATCTAGGACTGTAAGTACAAAAATAAACTAATTCT  
GAAAAGAA

>NM\_024085.5 Homo sapiens autophagy related 9A (ATG9A), transcript variant 2, mRNA

GAGTGGCAGACACCCGGCCTAGCGCCGCGGGTCGCGCCGAGCCGAGCCGAGCCGAGCGGAGCCGGCGGAG  
CCTCTGGAATCACCCGGGTCGCTGTTCTGAGGTGGTCAAGGTGGACAGGGGGCGGTGGTGATGGCGCAG  
TTTGACACTGAATACCAGCGCCTAGAGGCCTCCTATAGTGATTCACCCCCAGGGGAGGAGGACCTGTTGG  
TGACGTCGCCGAGGGGAGCAAGTCACCTTGGCACCATATTGAAAACCTTGACCTCTTCTCTCTCGAGT  
TTATAATCTGCACCAGAAGAATGGCTTCACATGTATGCTCATCGGGGAGATCTTTGAGCTCATGCAGTTC  
CTCTTTGTGGTTGCCTTCACTACCTTCCTGGTCAGCTGCGTGGACTATGACATCCTATTTGCCAACAAGA  
TGGTGAACCACAGTCTTCACCCTACTGAACCCGTCAAGGTCACTCTGCCAGACGCCTTTTTGCCTGCTCA  
AGTCTGTAGTGCCAGGATTACAGGAAAATGGCTCCCTTATCACCATCCTGGTCATTGCTGGTGTCTTCTGG  
ATCCACCGGCTTATCAAGTTCATCTATAACATTTGCTGCTACTGGGAGATCCACTCCTTCTACCTGCACG  
CTCTGCGCATCCCTATGTCTGCCCTTCGTATTGCACGTGGCAAGAAGTGCAGGCCCGGATCGTGCAGAC

GCAGAAGGAGCACCAGATCTGCATCCACAAACGTGAGCTGACAGAACTGGACATCTACCACCGCATCCTC  
CGTTTCCAGAACTACATGGTGGCACTGGTTAACAAATCCCTCCTGCCTCTGCGCTTCCGCTGCCTGGCC  
TCGGGGAAGCTGTCTTCTCACCCGTGGTCTCAAGTACAACTTTGAGCTGATCCTCTTCTGGGGACCTGG  
CTCTCTGTTTCTCAATGAATGGAGCCTCAAGGCCGAGTACAAACGTGGGGGGCAACGGCTAGAGCTGGCC  
CAGCGCCTCAGCAACCGCATCCTGTGGATTGGCATCGCTAACTTCCTGCTGTGCCCCCTCATCCTCATAT  
GGCAAATCCTCTATGCCTTCTTCAGCTATGCTGAGGTGCTGAAGCGGGAGCCGGGGGCCCTGGGAGCACG  
CTGCTGGTCACTCTATGGCCGCTGCTACCTCCGCCACTTCAACGAGCTGGAGCACGAGCTGCAGTCCCGC  
CTCAACCGTGGCTACAAGCCCGCCTCCAAGTACATGAATTGCTTCTTGTCACCTCTTTTGACACTGCTGG  
CCAAGAATGGAGCCTTCTTCGCTGGCTCCATCCTGGCTGTGCTTATTGCCCTCACCATTATGACGAAGA  
TGTGTTGGCTGTGGAACATGTGCTGACCACCGTCACACTCCTGGGGGTCACCGTGACCGTGTGCAGGTCC  
TTTATCCCGGACCAGCACATGGTGTCTGCCCTGAGCAGCTGCTCCGCGTGATCCTCGCTCACATCCACT  
ACATGCCTGACCACTGGCAGGGTAATGCCACCGCTCGCAGACCCGGGACGAGTTTGCCAGCTCTTCCA  
GTACAAGGCAGTGTTCATTTTGGAAGAGTTGCTGAGCCCCATTGTCACACCCTCATCCTCATCTTCTGC  
CTGCGCCACGGGCCCTGGAGATTATAGACTTCTCCGAACTTCACCGTGGAGGTCGTTGGTGTGGGAG  
ATACCTGCTCCTTTGCTCAGATGGATGTTGCCAGCATGGTCATCCCCAGTGGCTATCTGCTGGGCAGAC  
AGAGGCCTCAGTGTACCAGCAAGCTGAGGATGGAAAGACAGAGTTGTCACTCATGCACTTTGCCATCACC  
AACCTGGCTGGCAGCCACCACGTGAGAGCACAGCCTTCTAGGCTTCTCAAGGAGCAGGTTTCAGCGGG  
ATGGAGCAGCTGCTAGCCTCGCCCAAGGGGGTCTGCTCCCTGAAAATGCCCTCTTTACGTCTATCCAGTC  
CTTACAATCTGAGTCTGAGCCCCTGAGCCTTATCGCAAATGTGGTAGCTGGCTCATCCTGCCGGGGCCCT  
CCACTGCCCAGAGACCTGCAGGGCTCCAGGCACAGGGCTGAAGTCGCTCTGCCCTGCGCTCCTTCTCCC  
CGCTGCAACCCGGGCAGGCGCCACAGGCCGGGCTCACAGCACCATGACAGGCTCTGGGGTGGATGCCAG  
GACAGCCAGCTCCGGGAGCAGCGTGTGGGAAGGACAGCTGCAGAGCCTGGTGCTGTCAGAATATGCATCC  
ACAGAGATGAGCCTGCATGCCCTCTATATGCACCAGCTCCACAAGCAGCAGGCCCAGGCTGAACCTGAGC  
GGCATGTATGGCACC GCCGGGAGAGTGATGAGAGTGGAGAAAGCGCCCCTGATGAAGGGGGAGAGGGCGC  
CCGGGCCCCCAGTCTATCCCTCGCTCTGCTAGCTATCCCTGTGCAGCACCCCGGCCTGGAGCTCCTGAG

ACCACTGCCCTGCATGGGGGCTTCCAGAGGCGCTACGGTGGCATCACAGATCCTGGCACAGTGCCCAGGG  
TTCCCTCTCATTTCTCTCGGCTGCCTCTTGAGGGTGGGCAGAAGATGGGCAGTCGGCATCAAGGCACCC  
TGAGCCCGTGCCCGAAGAGGGGCTCGGAGGATGAGCTACCCCTCAGGTGCACAAGGTATAGACAAGGCTG  
AGCAGGGTTCCTGTGGCCAGGATGGAGGCCACCGCTGCCCTGCCATCCCGTCTGCCTGCCATGGGACGG  
CTCCTCTGAGTGTTCCCTGGCCCCACGTGTGTGGTGTGTTGTGTGTCTGTGCCTGGCCAAGGGAGGTGCCA  
ACACTGGGCTTGCCACAGCCCCAGGAGAGGAATTTGGGGCCTAGGAACCGAGGGGCACACGGGACTCTAGC  
CTCATCCCCAGGACCCCCTTGGCTCAGAGTGTGGTGCTAGAACTGGCCCCAGCCCAGCCCCAGTACTG  
CCACCTTTACACCTACCCCTGCAAGTCCCCAGAGGGCTGCCCACGATAGAAGCTGCCAAGCAGGGAGAAC  
CTGTGCCAACTGTGGAGTGGGGAGGTTGGGCCTGGACCCTCAACCCCTGCAACCTTCCCTAGCCCCCTCA  
ATAGATGAGCAGGTCAGGCTGTGGCCCTTACCTACCCGCAGTTCTCGCCCAGTGCTGCAGCCGGCTCAC  
CTCTCTCCGCTTCTTGACATCACTGGCCTGTGTGTGCTGCTTGCTCCTGTTCTGTTGCTTCCCGT  
TCCGTTCCGCTTTTGCTTTGCGTTAGGGTGAAGACCCTAGCGTCCAGCTCCCCTCAACGCTATATTTTGA  
CACTAAAAAAGAAGGTTTCTAAATTGTAGGAGCAGGATGGAAATACTTTGCTGCCCTTGCCATCTTTTAG  
GATGGGCCCCCAGGAGACTGAGGTCTTCTGGGCCCTCATTGCTGCTTATCGTACCCCCCATCACCTGCA  
CATGGGACAGACCGGGCTGGAGGGTGACCTTGGCTGTGTGCGTCCAGCAAAAGAGCTCTGGCCCGCATC  
TCGCTGTGCCCTGAAGGGGGATGAAGGGCGATGCCTCGCCCGAGGCTTTGGGCTGCTGCACTGCATGCTG  
GGACTGCTCCTACTCTGTCCCACCCCTCACCCAGCTGTGGTCCGGCTTTGGGAGAGTGGTGAATTGCG  
CTGCCCCAACTCGGAGCGGAGCAGGGTAGGGACCGTGTACAGCTTGATAACCCTTAATAAAAAGGGAGTT  
TGACCAGA

>NM\_173681.5 Homo sapiens autophagy related 9B (ATG9B), transcript variant 1, mRNA

AGCTCAGTGTCACAGACCTTTGTGGAAGCAACAACAGCTCCCATCCTTCCAACCTTTCTGGAGAAGCCGT  
GGCCTGATGGTGAGCCGAATGGGCTGGGGGGGAGAAGAAGGCGGCTGGGGCGGTGGGGAGATCTGGGGC

CCGGATCGGTGCCCCTCTCCCATGCCACTGCCACCTCCTCCTCCTTCATGCCGGGGACCTGGGGG  
AGGGAGGATCTCCATCTTCTCTGTCCCCTGCCCTCATACAAGAAGCTCCCCCTCCTATTTTCCCCT  
CCCACCGCAGGGCCCCCTTGCTCAGTGCTACAGGGGACAGGGGCTTCTCAGTCTTGCCACAGTGCTCTCC  
CTATCCCAGCCACCCCCCAACACAGGCTCAACCTGCAATGACACCTGCCTCTGCATCTCCCTCCTGGGG  
ATCCCACTCCACCCACCCCTGGCCCCGGCAACCCCACTCCCTCACAGCAGTGCCCCAGGACTCTCCT  
GGGCTGCGGGTAGGCCCTTTGATCCCTGAACAGGATTATGAGCGGCTGGAGGACTGTGACCCTGAGGGGT  
CCCAAGACTCACCCATCCACGGGGAGGAGCAGCAACCCCTGCTTCATGTCCCTGAAGGGCTCCGAGGCTC  
CTGGCATCACATCCAGAACCTGGACAGTTTCTTACCAAGATCTACAGTACCACCAGCGGAATGGCTTT  
GCCTGCATCTTGCTGGAGGATGTCTTCCAGCTGGGACAATTTATTTTCATTGTCACCTTCACAACCTTCC  
TCCTTCGATGCGTGATTACAATGTTCTCTTTGCCAACCAACCAAGTAACCATAACCAGACCTGGGCCGTT  
CCACAGCAAAGTGACCCTGTCAGATGCCATCCTACCCTCAGCCCAGTGTGCTGAGAGGATCCGCTCCAGC  
CCGCTGCTGGTCCTCCTCCTGGTCCTGGCTGCCGGCTTCTGGCTGGTCCAACCTGCTTCGCTCAGTCTGCA  
ACCTCTTCAGTACTGGGACATCCAGGTGTTTTACAGGGAGGCCCTGCACATCCCCCGGAGGAGCTGAG  
CTCGGTTCCCTGGGCAGAGGTGCAGTCCCGCCTCTTGGCACTGCAGCGGAGCGGGGGCCTGTGCGTGCA  
CCGCGGCCCTGACGGAGCTGGACATCCACCACCGCATCCTGCGCTACACCAACTACCAGGTGGCGCTGG  
CCAACAAAGGCCTGCTGCCGGCCCCGCTGCCCGCTGCCCTGGGGAGGCAGTGCGGCTTTCCTCAGCCGCG  
CCTGGCGCTCAATGTCGACCTGCTGCTCTTCCGCGGTCCCTTCTCGCTCTTCCGCGGGGGCTGGGAGCTG  
CCGCACGCCTACAAGCGCAGCGACCAGCGGGGGCGCCCTAGCAGCGCGCTGGGGGCGCACAGTGCTGCTGC  
TGGCCGCCCTGAACCTGGCGCTGAGCCCGCTGGTGCTGGCCTGGCAGGTTCTGCACGTCTTCTATAGCCA  
CGTGAGCTGCTGCGGCGCGAGCCTGGCGCGCTGGGGGCGCGCGGCTGGTCCCGCTGGCGCGCTTGAG  
CTGCGCCACTTCAACGAGCTGCCGCAGAGCTGCGCGCGCGCCTGGCCCGCGCCTACCGCCCCGCCGCCG  
CCTTCTGCGCACCGCTGCGCCCCCGCGCCCCCTGCGCACGCTGCTGGCCCGCCAGCTCGTTTTCTTCGC  
GGGTGCACTCTTCGCCGCGCTGCTTGCTCACCGTCTACGACGAGGACGTGCTAGCCGTGGAGCACGTG  
CTACCGCCATGACCGCGCTCGGGGTACCGCCACCGTCGCCAGGTCTTTCATTCCGGAAGAGCAGTGCC  
AGGGTCGTGCGCCGAGCTCCTGCTGCAGACAGCCCTGGCCCACATGCACTACCTCCCGGAGGAGCCCGG

CCCCGGCGGCAGGGACCGCGCCTACCGGCAGATGGCGCAGCTGCTGCAGTACCGAGCGGTCTCCCTCCTG  
GAGGAGCTCCTGTCCCCGCTCTCACCCCGCTGTTTCTGCTTTTCTGGTTCCGCCCTCGTGCCCTGGAGA  
TTATCGACTTTTTTTCATCACTTCACTGTGGATGTGGCTGGGGTTGGGGACATCTGTTCCCTTGCCCTTAT  
GGATGTGAAGCGCCACGGACACCCTCAGTGGCTCTCGGCGGGACAGACTGAGGCCTCGCTGTCTCAGCGT  
GCGGAGGACGGCAAGACTGAGCTTTCTTTGATGCGGTTCTCCCTGGCGCATCCACTCTGGCGCCCCCAG  
GGCACAGCTCTAAGTTTCTTGGGCACCTCTGGGGCCGAGTACAACAAGATGCAGCTGCCTGGGGTGCCAC  
CTCGGCTCGCGGCCCTCCACCCGGGGGTGCTCAGCAACTGCACCTCGCCCCTGCCTGAGGCCTTCCTG  
GCCAACCTCTTCGTGCACCCTCTCCTGCCTCCGAGAGATCTGAGCCCGACAGCCCCCTGTCCAGCTGCGG  
CCACAGCCAGCCTCCTTGCTCCATTTCCCGAATTGCCAGGACCCAGCTCTGTGTCCCAGGAGGCAC  
TGGGGGCCAGAAGCTGGCCCAGCTCCAGAACTTGCTTCTGCCGAGATGAGTCTCCATGTCATCTACCTG  
CACCAGCTTCACCAGCAGCAGCAGCAGCAGGAGCCGTGGGGTGAGGCTGCAGCCTCCATCCTGTCCAGGC  
CCTGCTCCAGCCCCTCACAGCCACCCTCGCCTGATGAGGAGAAGCCATCCTGGTCAAGTGACGGCTCCAG  
TCCTGCCTCTAGCCCCAGACAACAGTGGGGAACCCAGAAGGCCCGGAATCTGTTCCCCGGAGGGTTTCAG  
GTGACCACAGACACCCAGAAGGAGCCTGACCGGGCCTCTTGCACTGACTGAGACGACTCCTCAGGGCCCC  
ACTCCTGGCAGCTGAGTGCTGCACCTGCCTTCTCGATCACGAGCCTGAGAACTGCACGGGGGAGCAGCCC  
AGACTGGCTGGAAACCATGTTTTAGAGTGCAGGGTCAAGTGGCGTCCTCTGGACAGATGTGAGAAGGCA  
CCACCTCAAGAGGGGAGGAGCGGGGCTGATCCTGGTCGGGCGGACCTGAGTCGGGCAGCCGCTCTCCCGG  
AACTGGAAGGGAAAGCCAGGCGGCTCTCAGGGGCTGTTGGTGTCTGAGCCGGGAGGGTCTGAACGCCCAGG  
GCACTGCGCCCCGCAACTGACGCTCCTGCAAGGAAAAGCTCTGGCACGCCGATGACGTCGCCGGCCTCGT  
CCAGCTCCATGTCGCCCTCCGTGCCCAGGATGCGCTGCACGGTCTGCAGGACGTTGGTTGCCATGGTAAC  
ATCGCCGCAGACAAACATGTGGCCCCGCTCGAGGCACAGCACGCGGTGCACCTCCGCAGCCAGCTCCGTC  
CTCAGGATGTCCTGCACGTTACCATTGCGCCCTCAGGGTCTCACACCTTGGGGTTGTCAGGTTCCCGGA  
GAAGGCGGTGAGGACTCGGCCAAACACCCGCGCTGCTGGGCGTTCTGCACCTCGTCGCGGTAGAGATGG  
TCAAGTTGGGAGCATCGGCAGCCGAACACCAAAGTCATGGGAGTGGGCTGCAGCCCTGCAAGCAACCCCG  
CGCTTGGGAAGGCTCTTCTCCGGGGCACAGTGCTAGTGGGGCCTCCCCACAGGCCACCGTCGCCCAGCCT

GGCAGCCCAGCGTTTTGGGCTGAAACCACCATTACTTTGGCTGTTTCATCTCTAAGAGAGTGTAGAATGC  
TTTCACAGAGACCCTGCACAGCCCTGATTACAGAGGGAAGGGAAGCGCGGGTGAGGTGGTGGCCCTGG  
TGGAGCTGCGCTAGAATGCGCGGCTTCGGACTCAGAATTCCATGCCCTTGCATTGTGTGACATCGCAGT  
CCCCTTCCCCGCTCCCACTTCATATTCTCCATACTTATAACTCTCCTCCCAGTCACAGCCCTCTTCTTT  
TGATTGACAGACCACCCTGGGCACCCCATGCTCAATATGAACACCTGTAGCATCCTTAGGTCTTGGACA  
GACCTCGGTGAGCTCTGGCACAGTCAAGAATCCACCTTGGGCAGTTCTTCTTTGAGTCTTAGCCCTAATC  
CCTTTGAAAATTCTATTTTCCTTTGCTCTCAATCCAGTCAACACCTACTATGTACCAGGCACCAGGAAGC  
CAGAAGCTCAGGGCCCAGCCCTTGCCCTTGGTACCTGCCCTCCCCTTGGTCTCATGAGCGTCTTTTCAGC  
TTTGTGGACTTTGTTTCCTGCCCTCTCTTTCCTATTTCTGCCTTCCAGCCCCACCCCTCTGTCCCTAGA  
TTGTGTGACTCCCTTCAGGCAGTCCTTTAGTCCCAGCCTCACCTTTGCTCTCAATGTCATGCAGCCGCT  
CCTGCCAGAATCCCCGGAAGGGGGCAATGCCAGTGCCTGGACCCACCAGGATGCAGGGCAAGCTGGGATC  
GGGTGGCAGCCGGAAGGAGGGAGCCCTGGCAGGAGAGACACTCCATCAGGTCCCCTTTGCCTTTCCTGCT  
CCACCATTCTACCATGCAGGGTGGGTGGAGCAAGGAGGACCCAAGTTCTTCCCATCTCAAAAAAAAAATT  
AAAAAAAAAACAAAAACAAAAACAA

>NM\_004044.7 Homo sapiens 5-aminoimidazole-4-carboxamide ribonucleotide formyltransferase/IMP  
cyclohydrolase (ATIC), mRNA

GCCACATCCCGGCAGCCCTCCTACCTGCGCACGTGGTGCCGCCGCTGCTGCCTCCCGCTCGCCCTGAACC  
CAGTGCCTGCAGCCATGGCTCCCGGCCAGCTCGCCTTATTTAGTGTCTCTGACAAAACCGGCCTTGTGGA  
ATTTGCAAGAACTGACCGCTCTTGTTTGAATCTGGTCGCTTCCGGAGGGACTGCAAAGCTCTCAGG  
GATGCTGGTCTGGCAGTCAGAGATGTCTCTGAGTTGACGGGATTTCTGAAATGTTGGGGGGACGTGTGA  
AACTTTGCATCCTGCAGTCCATGCTGGAATCCTAGCTCGTAATATTCCAGAAGATAATGCTGACATGGC  
CAGACTTGATTCAATCTTATAAGAGTTGTTGCCTGCAATCTCTATCCCTTTGTAAAGACAGTGGCTTCT  
CCAGGTGTAAGTGTGAGGAGGCTGTGGAGCAAATTGACATTGGTGGAGTAACCTTACTGAGAGCTGCAG

CCAAAAACCACGCTCGAGTGACAGTGGTGTGTGAACCAGAGGACTATGTGGTGGTGTCCACGGAGATGCA  
GAGCTCCGAGAGTAAGGACACCTCCTTGGAGACTAGACGCCAGTTAGCCTTGAAGGCATTCACTCATACG  
GCACAATATGATGAAGCAATTTTCAGATTATTTTCAGGAAACAGTACAGCAAAGGCGTATCTCAGATGCCCT  
TGAGATATGGAATGAACCCACATCAGACCCCTGCCAGCTGTACACACTGCAGCCCAAGCTTCCCATCAC  
AGTTCTAAATGGAGCCCCTGGATTTATAAACTTGTGCGATGCTTTGAACGCCTGGCAGCTGGTGAAGGAA  
CTCAAGGAGGCTTTAGGTATTCCAGCCGCTGCCTCTTTCAAACATGTCAGCCCAGCAGGTGCTGCTGTTG  
GAATTCCACTCAGTGAAGATGAGGCCAAAGTCTGCATGGTTTATGATCTCTATAAAACCCTCACACCCAT  
CTCAGCGGCATATGCAAGAGCAAGAGGGGCTGATAGGATGTCTTCATTTGGTGATTTTGTTGCATTGTCC  
GATGTTTGTGATGTACCAACTGCAAAAATTATTTCCAGAGAAGTATCTGATGGTATAATTGCCCCAGGAT  
ATGAAGAAGAAGCCTTGACAATACTTTCCAAAAAGAAAAATGGAACTATTGTGTCCTTCAGATGGACCA  
ATCTTACAAACCAGATGAAAATGAAGTTCGAACTCTCTTTGGTCTTCATTTAAGCCAGAAGAGAAATAAT  
GGTGTGTCGACAAAGTCATTATTTAGCAATGTTGTTACCAAAAAATAAAGATTTGCCAGAGTCTGCCCTCC  
GAGACCTCATCGTAGCCACCATTGCTGTCAAGTACACTCAGTCTAACTCTGTGTGCTACGCCAAGAACGG  
GCAGGTTATCGGCATTGGAGCAGGACAGCAGTCTCGTATACACTGCACTCGCCTTGCCAGGAGATAAGGCA  
AACTATTGGTGGCTTAGACACCATCCACAAGTGCTTTTCGATGAAGTTTAAACAGGAGTGAAGAGAGCAG  
AAATCTCCAATGCCATCGATCAATATGTGACTGGAACCATTGGCGAGGATGAAGATTTGATAAAGTGGAA  
GGCACTGTTTGAGGAAGTCCCTGAGTTACTCACTGAGGCAGAGAAGAAGGAATGGGTTGAGAACTGACT  
GAAGTTTCTATCAGCTCTGATGCCTTCTTCCCTTTCCGAGATAACGTAGACAGAGCTAAAAGGAGTGGTG  
TGGCGTACATTGCGGCTCCCTCCGTTCTGCTGCTGACAAAGTTGTGATTGAGGCCTGCGACGAACTGGG  
AATCATCCTCGCTCATACGAACCTTCGGCTCTTCCACCACTGATTTTACCACACACTGTTTTTTGGCTTG  
CTTATGTGTAGGTGAACAGTCACGCCTGAACTTTGAGGATAACTTTTTAAAAAAATAAAACAGTATCTC  
TTAATCACTGGA

>NM\_004323.6 Homo sapiens BAG cochaperone 1 (BAG1), transcript variant 1, mRNA

AGCTTCCATCGCTGGGCGGTCAACAAGTGCGGCCTGGCTCAGCGCGGGGGGCGCGGAGACCGCGAGGC  
GACCGGGAGCGGCTGGGTTCCTCGGCTGCGCGCCCTTCGGCCAGGCCGGGAGCCGCGCCAGTCGGAGCCCC  
CGGCCAGCGTGGTCCGCCTCCCTCTGGGCGTCCACCTGCCCGGAGTACTGCCAGCGGGCATGACCGACC  
CACCAGGGGCGCCGCCCGGCGCTCGCAGGCCGCGGATGAAGAAGAAAACCCGGCGCCGCTCGACCCGG  
AGCGAGGAGTTGACCCGGAGCGAGGAGTTGACCCTGAGTGAGGAAGCGACCTGGAGTGAAGAGGCGACCC  
AGAGTGAGGAGGCGACCCAGGGCGAAGAGATGAATCGGAGCCAGGAGGTGACCCGGGACGAGGAGTCGAC  
CCGGAGCGAGGAGGTGACCAGGGAGGAAATGGCGGCAGCTGGGCTCACCGTGACTGTCACCCACAGCAAT  
GAGAAGCACGACCTTCATGTTACCTCCCAGCAGGGCAGCAGTGAACCAAGTTGTCCAAGACCTGGCCCAGG  
TTGTTGAAGAGGTCATAGGGGTTCCACAGTCTTTTCAGAACTCATATTTAAGGGAAAATCTCTGAAGGA  
AATGGAAACACCGTTGTCAGCACTTGAATACAAGATGGTTGCCGGGTCATGTTAATTGGGAAAAAGAAC  
AGTCCACAGGAAGAGGTTGAACTAAAGAAGTTGAAACATTTGGAGAAGTCTGTGGAGAAGATAGCTGACC  
AGCTGGAAGAGTTGAATAAAGAGCTTACTGGAATCCAGCAGGGTTTTCTGCCAAGGATTTGCAAGCTGA  
AGCTCTCTGCAAACTTGATAGGAGAGTAAAAGCCACAATAGAGCAGTTTATGAAGATCTTGGAGGAGATT  
GACACACTGATCCTGCCAGAAAATTTCAAAGACAGTAGATTGAAAAGGAAAGGCTTGGTAAAAAAGGTTT  
AGGCATTCCTAGCCGAGTGTGACACAGTGGAGCAGAACATCTGCCAGGAGACTGAGCGGCTGCAGTCTAC  
AACTTTGCCCTGGCCGAGTGAGGTGTAGCAGAAAAAGGCTGTGCTGCCCTGAAGAATGGCGCCACCAGC  
TCTGCCGTCTCTGGAGCGGAATTTACCTGATTTCTTCAGGGCTGCTGGGGGCAACTGGCCATTTGCCAAT  
TTTCCTACTCTCACACTGGTTCTCAATGAAAAATAGTGTCTTTGTGATTTTGAGTAAAGCTCCTATCTGT  
TTTCTCCTTCTGTCTCTGTGGTTGTACTGTCCAGCAATCCACCTTTTCTGGAGAGGGCCACCTCTGCCCA  
AATTTCCAGCTGTTTGGACCTCTGGGTGCTTTCTTTGGGCTGGTGAGAGCTCTAATTTGCCTTGGGCC  
AGTTTCAGGTTTATAGGCCCCCTCAGTCTTCAGATACATGAGGGCTTCTTTGCTCTTGTGATCGTGTAGT  
CCCATAGCTGTAAAACCAGAATCACCAGGAGGTTGCACCTAGTCAGGAATATTGGGAATGGCCTAGAACA  
AGGTGTTTGGCACATAAGTAGACCACTTATCCCTCATTGTGACCTAATTCCAGAGCATCTGGCTGGGTTG  
TTGGGTTCTAGACTTTGTCCTCACCTCCCAGTGACCCTGACTAGCCACAGGCCATGAGATACCAGGGGGC

CGTTCCTTGGATGGAGCCTGTGGTTGATGCAAGGCTTCCTGTCCCCAAGCAAGTCTTCAGAAGGTTAGA  
ACCCAGTGTTGACTGAGTCTGTGCTTGAAACCAGGCCAGAGCCATGGATTAGGAAGGGCAAAGAGAAGGC  
ACCAGAATGAGTAAAGCAGGCAGGTGGTGAAGCCAACCATAAACTTCTCAGGAGTGACATGTGCTTCCTT  
CAAAGGCATTTTTGTAAACCATATCCTTCTGAGTTCTATGTTTCCTTCACAGCTGTTCTATCCATTTTGT  
GGACTGTCCCCACCCCCACCCCATCATTGTTTTTAAAAAATTAAGGCCTGGCGCAGCAGCTCATGCCTA  
TAATCCCAGCACTTTGGGAGGCTGAGGCGGGCGGATCACTTGAGGCCAGGAGTTTGAGACCAGCCCAGGC  
AACATAGCAAAACCCCATCTGCTTTAAAAAAAAAAAAAAAAAATTAGCTTGGCGTAGTGGCATGTGC  
CTATAATCCCAGCTACTGGGGAGGCTGAGGCACAAGAATCATTTGAACCTGGGAGGTAGAGGTTGCTGTG  
AGCCGAGATTACGCCCTGCACTCCAGCCTGGGTACAGAGTGAGACTCCATCTCAGAAAAAAAAAAAAAT  
TGAGTCAGGTGCAGTAGCTCCTTCCTGTAGTCCCAGCTACTTGGGAGGCTGAGGCTAGAGGATCACTTGA  
GCCCAGGAGTTTGAGTCTAGTCTGGGCAACATAGCAAGACCCCATCTCTAAAATTTAAGTAAGTAAAAGT  
AGATAAATAAAAAGAAAAAAAAAACTGTTTATGTGCTCATCATAAAGTAGAAGAGTGGTTTGCTTTTTTTT  
TTTTTTTTGGATTAATGAGGAAATCATTCTGTGGCTCTAGTCATAATTTATGCTTAATAACATTGATAGT  
AGCCCTTTGCGCTATAACTCTACCTAAAGACTCACATCATTGCGCAGAGAGAGAGTCGTTGAAGTCCCAG  
GAATTCAGGACTGGGCAGGTAAAGACCTCAGACAAGGTAGTAGAGGTAGACTTGTGGACAAGGCTCGGGT  
CCCAGCCCACCGCACCCCACTTTAATCAGAGTGGTTCCTATTGATCTATTTTTGTGTGATAGCTGTGT  
GGCGTGGGCCACAACATTTAATGAGAAGTTACTGTGCACCAAAGTCCCGAACACCATTCTAACTATTCA  
TATATATTAGTCATTTAATTCTTACATAACTTGAGAGGTAGACAGATATCCTTATTTTAGAGATGAGGAA  
ACCAAGAGAACTTAGGTCATTAGCGCAAGGTTGTAGAGTAAGCGGCAAAGCCAAGACACAAAGCTGGGTG  
GTTTGGTTTCAGAGCCAGTGCTTTTCCCCTCTACTGTACTGCCTCTCAACCAACACAGGGTTGCACAGGC  
CCATTCTCTGATTTTTTCTCTTGTCTCTGCCTCTCCCTCTAGCTCCCACTTCTCTCTGCTCTAGTT  
CATTTTCTTTAGAGCAGCCCGAGTGATCATGAAGTGCAAATCTTGCCATGTCAGTCCCCTGCTTAGAACC  
CTCCAATGGCTCACTTTCTTTTAGGCAAAAGTCTTTACCCCATGCCTTCTCCCATCTCATCTCAACCCC  
CTCATTTGTTGGCTGTCTGCTGTGAGCCACTCTTCTTTCAGGTCCTCAGATGCACTGCACCCCTCTCCTGC  
CTGGGGGTCTTTGCTCCTGCTACTACCTCTGCTTGAACAGCTCCTCACCTTCCTTCTCCAACCCTACCC

TTGTATAGGTGACTTTTGTTTCATCCTTCAGAATTCAACTCACATGTCTCTTGCATGGAGAACCCTCACCT  
ACTGTGTTGAGACCCTGTCCAGCCCCAGGTGGGATCCTCTCTCGACTTCCCATACATTTCTTTCACAGC  
ATTACATAGTCCATGATAGTTTACTTGTGGGATTATTTGGTTAATCTTTCCTTTAACACCAGGGTTCC  
TTGGGTGAAGGAGCTTCTTTATCTTGGTAACAGCATTATTTCAAGCATAACTTGTAATATAGTTATATTA  
CATATATAACATATATATATATAACATAACATATATAACATATATAACAAGCATAACTTGTTATATAGTC  
TTGTATATAGTAAGACCTCAATAAATATTTGGAGAACAAA

>NM\_004281.4 Homo sapiens BAG cochaperone 3 (BAG3), mRNA

GCATCCAACCCCGGGCCGCGCCAACCTTCTCTGGACTGGACCAGAAGTTTCTAGCCGGCCAGTTGCTACC  
TCCCTTTATCTCCTCCTTCCCCTCTGGCAGCGAGGAGGCTATTTCCAGACACTTCCACCCCTCTCTGGCC  
ACGTCACCCCGCCTTTAATTCATAAAGGTGCCCCGCGCCGGCTTCCCGACACGTCGGCGGCGGAGAGG  
GGCCACGGCGGCGGCCCCGGCCAGAGACTCGGCGCCCCGGAGCCAGCGCCCCGCACCCGCGCCCCAGCGGG  
CAGACCCCAACCCAGCATGAGCGCCGCCACCACTCGCCCATGATGCAGGTGGCGTCCGGCAACGGTGAC  
CGCGACCCTTTGCCCCCGGATGGGAGATCAAGATCGACCCGAGACCGGCTGGCCCTTCTTCGTGGACC  
ACAACAGCCGCACCACTACGTGGAACGACCCGCGCGTGCCCTCTGAGGGCCCCAAGGAGACTCCATCCTC  
TGCCAATGGCCCTTCCCGGGAGGGCTCTAGGCTGCCGCCTGCTAGGGAAGGCCACCCTGTGTACCCCCAG  
CTCCGACCAGGCTACATTCCCATTCCTGTGCTCCATGAAGGCGCTGAGAACCGGCAGGTGCACCCTTTCC  
ATGTCTATCCCCAGCCTGGGATGCAGCGATTCCGAACCTGAGGCGGCAGCAGCGGCTCCTCAGAGGTCCCA  
GTCACCTCTGCGGGGCATGCCAGAAACCACTCAGCCAGATAAACAGTGTGGACAGGTGGCAGCGGCGGCG  
GCAGCCCAGCCCCAGCCTCCACGGACCTGAGCGGTCCCAGTCTCCAGCTGCCTCTGACTGCTCATCCT  
CATCCTCCTCGGCCAGCCTGCCTTCTCCGGCAGGAGCAGCCTGGGCAGTCACCAGCTCCCGCGGGGGTA  
CATCTCCATTCCGGTGATACACGAGCAGAACGTTACCCGGCCAGCAGCCCAGCCCTCCTTCCACCAAGCC  
CAGAAGACGCACTACCCAGCGCAGCAGGGGGAGTACCAGACCCACCAGCCTGTGTACCACAAGATCCAGG

GGGATGACTGGGAGCCCCGGCCCCTGCGGGCGGCATCCCCGTTCAAGTCATCTGTCCAGGGTGCATCGAG  
CCGGGAGGGCTCACCAGCCAGGAGCAGCACGCCACTCCACTCCCCCTCGCCCATCCGTGTGCACACCGTG  
GTCGACAGGCCTCAGCAGCCCATGACCCATCGAGAACTGCACCTGTTTCCCAGCCTGAAAACAAACCAG  
AAAGTAAGCCAGGCCCAGTTGGACCAGAACTCCCTCCTGGACACATCCCAATTCAAGTGATCCGCAAAGA  
GGTGGATTCTAAACCTGTTTCCCAGAAGCCCCCACCTCCCTCTGAGAAGGTAGAGGTGAAAGTTCCCCCT  
GCTCCAGTTCCTTGTCTCCTCCCAGCCCTGGCCCTTCTGCTGTCCCCTCTTCCCCAAGAGTGTGGCTA  
CAGAAGAGAGGGCAGCCCCAGCACTGCCCCTGCAGAAGCTACACCTCCAAAACCAGGAGAAGCCGAGGC  
TCCCCAAAACATCCAGGAGTGCTGAAAGTGGAAGCCATCCTGGAGAAGGTACAGGGGCTGGAGCAGGCT  
GTAGACAACCTTTGAAGGCAAGAAGACTGACAAAAAGTACCTGATGATCGAAGAGTATTTGACCAAAGAGC  
TGCTGGCCCTGGATTCACTGGACCCCGAGGGACGAGCCGATGTGCGTCAGGCCAGGAGAGACGGTGTGAG  
GAAGGTTCAAGCATCTTGGAAAACTTGAACAGAAAGCCATTGATGTCCCAGGTCAAGTCCAGGTCTAT  
GAACTCCAGCCCAGCAACCTTGAAGCAGATCAGCCACTGCAGGCAATCATGGAGATGGGTGCCGTGGCAG  
CAGACAAGGGCAAGAAAAATGCTGGAAATGCAGAAGATCCCCACACAGAAACCCAGCAGCCAGAAGCCAC  
AGCAGCAGCGACTTCAAACCCCAGCAGCATGACAGACACCCCTGGTAACCCAGCAGCACCGTAGCCTCTG  
CCCTGTAAAAATCAGACTCGGAACCGATGTGTGCTTTAGGGAATTTTAAGTTGCATGCATTTCAAGACT  
TTAAGTCAGTTGGTTTTTATTAGCTGCTTGGTATGCAGTAACTGGGTGGAGGCAAAACACTAATAAAAAG  
GGCTAAAAGGAAAATGATGCTTTTCTTCTATATTCTTACTCTGTACAAATAAAGAAGTTGCTTGTTGTT  
TGAGAAGTTTAACCCCGTTGCTTGTTGTTCTGCAGCCCTGTCTACTTGGGCACCCCCACCACCTGTTAGC  
TGTGGTTGTGCACTGTCTTTTGTAGCTCTGGACTGGAGGGGTAGATGGGGAGTCAATTACCCATCACATA  
AATATGAAACATTTATCAGAAATGTTGCCATTTTAATGAGATGATTTTCTTCATCTCATAATTAATAAC  
CTGACTTTAGAGAGAGTAAAATGTGCCAGGAGCCATAGGAATATCTGTATGTTGGATGACTTTAATGCTA  
CATTTTAAAAAAGAAAATAAAGTAATAATACTCAAAA

>NM\_001188.4 Homo sapiens BCL2 antagonist/killer 1 (BAK1), mRNA

ACAGAGCAACTTCTCTAGAGGGAGCTGATTGGAGCCGGGTGCCGCTGGCACCTCTATGATCACTGGAGT  
CTCGCGGGTCCCTCGGGCTGCACAGGGACAAGTAAAGGCTACATCCAGATGCCGGAATGCACTGACGCC  
CATTCCTGGAAACTGGGCTCCCACTCAGCCCCTGGGAGCAGCAGCCGCCAGCCCCTCGGGACCTCCATCT  
CCACCCTGCTGAGCCACCCGGGTGGGCCAGGATCCCGGCAGGCTGATCCCGTCCTCCACTGAGACCTGA  
AAAATGGCTTCGGGGCAAGGCCAGGTCCTCCAGGCAGGAGTGCGGAGAGCCTGCCCTGCCCTCTGCTT  
CTGAGGAGCAGGTAGCCCAGGACACAGAGGAGGTTTTCCGCAGCTACGTTTTTACCGCCATCAGCAGGA  
ACAGGAGGCTGAAGGGGTGGCTGCCCCTGCCGACCCAGAGATGGTCACCTTACCTCTGCAACCTAGCAGC  
ACCATGGGGCAGGTGGGACGGCAGCTCGCCATCATCGGGGACGACATCAACCGACGCTATGACTCAGAGT  
TCCAGACCATGTTGCAGCACCTGCAGCCCACGGCAGAGAATGCCTATGAGTACTTCACCAAGATTGCCAC  
CAGCCTGTTTGAGAGTGGCATCAATTGGGGCCGTGTGGTGGCTCTTCTGGGCTTCGGCTACCGTCTGGCC  
CTACACGTCTACCAGCATGGCCTGACTGGCTCCTAGGCCAGGTGACCCGCTTCGTGGTTCGACTTCATGC  
TGCATCACTGCATTGCCCGGTGGATTGCACAGAGGGGTGGCTGGGTGGCAGCCCTGAACTTGGGCAATGG  
TCCCATCCTGAACGTGCTGGTGGTTCTGGGTGTGGTTCTGTTGGGCCAGTTTGTGGTACGAAGATTCTTC  
AAATCATGACTCCCAAGGGTGCCCTTTGGGGTCCCGTTTCAGACCCCTGCCTGGACTTAAGCGAAGTCTT  
TGCCTTCTCTGTTCCCTTGCAAGGGTCCCCCTCAAGAGTACAGAAGCTTTAGCAAGTGTGCACTCCAGC  
TTCGGAGGGCCCCTGCGTGGGGGCCAGTCAGGCTGCAGAGGCACCTCAACATTGCATGGTGCTAGTGGGC  
CCTCTCTCTGGGCCCAGGGGCTGTGGCCGTCTCCTCCCTCAGCTCTCTGGGACCTCCTTAGCCCTGTCTG  
CTAGGCGCTGGGGAGACTGATAACTTGGGGAGGCAAGAGACTGGGAGCCACTTCTCCCCAGAAAGTGTTT  
AACGGTTTTAGCTTTTTATAATACCCTTGTGAGAGCCATTCCACCATCTACCTGAGGCCAGGACGTC  
TGGGGTGTGGGGATTGGTGGGTCTATGTTCCCAAGGATTCAGCTATTCTGGAAGATCAGCACCTAAGAG  
ATGGGACTAGGACCTGAGCCTGGTCCTGGCCGTCCCTAAGCATGTGTCCAGGAGCAGGACCTACTAGGA  
GAGGGGGGCCAAGGTCCTGCTCAACTCTACCCCTGCTCCATTCTCCCTCCGGCCATACTGCCTTTGCA  
GTTGGACTCTCAGGGATTCTGGGCTTGGGGTGTGGGGTGGGGTGGAGTCGCAGACCAGAGCTGTCTGAAC  
TCACGTGTCAGAAGCCTCCAAGCCTGCCTCCCAAGGTCCTCTCAGTTCTCTCCCTCCTCTCTCCTTATA

GACACTTGCTCCCAACCCATTCACTACAGGTGAAGGCTCTCACCCCCATCCCTGGGGGCCTTGGGTGAGT  
GGCCTGCTAAGGCTCCTCCTTGCCCAGACTACAGGGCTTAGGACTTGGTTTGTATATCAGGGAAAAGGA  
GTAGGGAGTTCATCTGGAGGGTTCTAAGTGGGAGAAGGACTATCAACACCACTAGGAATCCCAGAGGTGG  
GATCCTCCCTCATGGCTCTGGCACAGTGTAATCCAGGGGTGTAGATGGGGGAACTGTGAATACTTGA  
CTGTCCCCCACCTCCATGCTCCTCACCTGTCTAGGTCTCCTCAGGGTGGGGGGTGACAGTGCCTTCTC  
TATTGGGCACAGCCTAGGGTCTTGGGGGTCAGGGGGGAGAAGTTCTTGATTAGCCAAATGCAGGGAGGG  
GAGGCAGATGGAGCCCATAGGCCACCCCCTATCCTCTGAGTGTTTGAAATAAACTGTGCAATCCCCTCA

>NM\_138763.4 Homo sapiens BCL2 associated X, apoptosis regulator (BAX), transcript variant delta, mRNA

GCGCTGCGGCCGCCGCGGACCCGGCGAGAGGCGGCGGGGAGCGGCGGTGATGGACGGGTCCGGGG  
AGCAGCCCAGAGGCGGGGGGCCACACAGCTCTGAGCAGATCATGAAGACAGGGGCCCTTTTGCTTCAGGG  
GATGATTGCCGCCGTGGACACAGACTCCCCCGAGAGGTCTTTTCCGAGTGGCAGCTGACATGTTTTCT  
GACGGCAACTTCAACTGGGGCCGGGTGTGCGCCCTTTCTACTTTGCCAGCAAAGTGGTGCTCAAGGCCC  
TGTGCACCAAGGTGCCGGAAGTATCAGAACCATCATGGGCTGGACATTGGACTTCCTCCGGGAGCGGCT  
GTTGGGCTGGATCCAAGACCAGGGTGGTTGGGACGGCCTCCTCTCTACTTTGGGACGCCCACGTGGCAG  
ACCGTGACCATCTTTGTGGCGGGAGTGCTCACCGCCTCACTCACCATCTGGAAGAAGATGGGCTGAGGCC  
CCCAGCTGCCTTGGACTGTGTTTTCTCCATAAATTATGGCATTCTTTCTGGGAGGGGTGGGGATTGGGG  
GACGTGGGCATTTTCTTACTTTGTAATTATTGGGGGGTGTGGGGAAGAGTGGTCTTGAGGGGGTAATA  
AACCTCCTTCGGGACACA

>NM\_000633.3 Homo sapiens BCL2 apoptosis regulator (BCL2), transcript variant alpha, mRNA

ACCCCTCGCCGCACCACACAGCGCGGGCTTCTAGCGCTCGGCACCGGCGGGCCAGGCGCGTCTGCCT  
TCATTTATCCAGCAGCTTTTCGGAAAATGCATTTGCTGTTTCGGAGTTTAATCAGAAGAGGATTCTGCCT  
CCGTCCCCGGCTCCTTCATCGTCCCCTCTCCCCTGTCTCTCTCTGCGGAGGCGTGAAGCGGTCCCGTGG  
ATAGAGATTCATGCCTGTGCCCCGCGCGTGTGTGCGCGCGTGTAATTGCCGAGAAGGGGAAAACATCACA  
GGACTTCTGCGAATACCGGACTGAAAATTGTAATTCATCTGCCGCCGCCGCTGCCTTTTTTTTTTCTCGA  
GCTCTTGAGATCTCCGGTTGGGATTCTGCGGATTGACATTTCTGTGAAGCAGAAGTCTGGGAATCGATC  
TGGAATCCTCCTAATTTTTACTCCCTCTCCCCGCGACTCCTGATTCATTGGGAAGTTTCAAATCAGCTA  
TAACTGGAGAGTGCTGAAGATTGATGGGATCGTTGCCTTATGCATTTGTTTTGGTTTTACAAAAAGGAAA  
CTTGACAGAGGATCATGCTGTACTTAAAAAATACAACATCACAGAGGAAGTAGACTGATTAACAATAC  
TTACTAATAATAACGTGCCTCATGAAATAAAGATCCGAAAGGAATTGGAATAAAAATTTCTGCATCTCA  
TGCCAAGGGGGAAACACCAGAATCAAGTGTTCCGCGTGATTGAAGACACCCCTCGTCCAAGAATGCAAA  
GCACATCCAATAAAATAGCTGGATTATAACTCCTCTTCTTTCTCTGGGGGCCGTGGGGTGGGAGCTGGGG  
CGAGAGGTGCCGTTGGCCCCGTTGCTTTTCTCTGGGAAGGATGGCGCACGCTGGGAGAACAGGGTACG  
ATAACCGGGAGATAGTGATGAAGTACATCCATTATAAGCTGTGCGCAGAGGGGCTACGAGTGGGATGCGGG  
AGATGTGGGCGCCGCGCCCCGGGGGCCGCCCCGACCGGGCATCTTCTCCTCCCAGCCCGGGCACACG  
CCCCATCCAGCCGCATCCCGGGACCGGTGCCAGGACCTCGCCGCTGCAGACCCCGGCTGCCCCGGCG  
CCGCCGCGGGCCTGCGCTCAGCCCGGTGCCACCTGTGGTCCACCTGACCCTCCGCCAGGCCGGCGACGA  
CTTCTCCCGCCGCTACCGCCGCGACTTCGCCGAGATGTCCAGCCAGCTGCACCTGACGCCCTTCACCGCG  
CGGGGACGCTTTGCCACGGTGGTGGAGGAGCTCTTCAGGGACGGGGTGAAGTGGGGGAGGATTGTGGCCT  
TCTTTGAGTTCGGTGGGGTCATGTGTGTGGAGAGCGTCAACCGGGAGATGTCGCCCCCTGGTGGACAACAT  
CGCCCTGTGGATGACTGAGTACCTGAACCGGCACCTGCACACCTGGATCCAGGATAACGGAGGCTGGGAT  
GCCTTTGTGGAAGTGTACGGCCCCAGCATGCGGCCTCTGTTTGATTCTCTGGCTGTCTCTGAAGACTC  
TGCTCAGTTTGGCCCTGGTGGGAGCTTGATCACCTGGGTGCCTATCTGGGCCACAAGTGAAGTCAACA  
TGCCTGCCCCAAACAAATATGCAAAGGTTCACTAAAGCAGTAGAAATAATATGCATTGTCAGTGATGTA  
CCATGAAACAAAGCTGCAGGCTGTTTAAGAAAAAATAACACACATATAAACATCACACACACAGACAGAC

ACACACACACACAACAATTAACAGTCTTCAGGCAAAACGTGCAATCAGCTATTTACTGCCAAAGGGAAAT  
ATCATTTATTTTTTACATTATTAAGAAAAAAGATTTATTTATTTAAGACAGTCCCATCAAACTCCTGT  
CTTTGGAAATCCGACCACTAATTGCCAAGCACCGCTTCGTGTGGCTCCACCTGGATGTTCTGTGCCTGTA  
AACATAGATTCGCTTTCCATGTTGTTGGCCGGATCACCATCTGAAGAGCAGACGGATGGAAAAAGGACCT  
GATCATTGGGGAAGCTGGCTTTCTGGCTGCTGGAGGCTGGGGAGAAGGTGTTCACTTGCATTTCTT  
TGCCCTGGGGGCTGTGATATTAACAGAGGGAGGGTTCCTGTGGGGGGAAGTCCATGCCTCCCTGGCCTGA  
AGAAGAGACTCTTTGCATATGACTCACATGATGCATACCTGGTGGGAGGAAAAGAGTTGGGAACCTCAGA  
TGGACCTAGTACCCACTGAGATTTCCACGCCGAAGGACAGCGATGGGAAAAATGCCCTTAAATCATAGGA  
AAGTATTTTTTTAAGCTACCAATTGTGCCGAGAAAAGCATTTTAGCAATTTATACAATATCATCCAGTAC  
CTTAAGCCCTGATTGTGTATATTCATATATTTTGGATACGCACCCCCCACTCCCAATACTGGCTCTGTC  
TGAGTAAGAAACAGAATCCTCTGGAACCTGAGGAAGTGAACATTTCCGTGACTTCCGCATCAGGAAGGCT  
AGAGTTACCCAGAGCATCAGGCCGCCACAAGTGCCTGCTTTTAGGAGACCGAAGTCCGCAGAACCTGCCT  
GTGTCCCAGCTTGGAGGCCTGGTCCTGGAACCTGAGCCGGGGCCCTCACTGGCCTCCTCCAGGGATGATCA  
ACAGGGCAGTGTGGTCTCCGAATGTCTGGAAGCTGATGGAGCTCAGAATTCCACTGTCAAGAAAGAGCAG  
TAGAGGGGTGTGGCTGGGCCTGTCACCCTGGGGCCCTCCAGGTAGGCCCGTTTTACGTGGAGCATGGGA  
GCCACGACCCTTCTTAAGACATGTATCACTGTAGAGGGAAGGAACAGAGGCCCTGGGGCCCTCCTATCAG  
AAGGACATGGTGAAGGCTGGGAACGTGAGGAGAGGCAATGGCCACGGCCCATTTTGGCTGTAGCACATGG  
CACGTTGGCTGTGTGGCCTTGGCCACCTGTGAGTTTAAAGCAAGGCTTTAAATGACTTTGGAGAGGGTC  
ACAAATCCTAAAAGAAGCATTGAAGTGAGGTGTCATGGATTAATTGACCCCTGTCTATGGAATTACATGT  
AAAACATTATCTTGTCATCTGTAGTTTGGTTTTATTTGAAAACCTGACAAAAAAAAGTTCCAGGTGTGGA  
ATATGGGGGTTATCTGTACATCCTGGGGCATTAAAAAAAATCAATGGTGGGGAACCTATAAAGAAGTAA  
CAAAGAAGTGACATCTTCAGCAAATAAACTAGGAAATTTTTTTTTCTTCAGTTTAGAATCAGCCTTGA  
AACATTGATGGAATAACTCTGTGGCATTATTGCATTATATACCATTTATCTGTATTAACCTTTGGAATGTA  
CTCTGTTCAATGTTTAATGCTGTGGTTGATATTTGAAAGCTGCTTTAAAAAATACATGCATCTCAGCG  
TTTTTTTGTTTTAATTGTATTTAGTTATGGCCTATACACTATTTGTGAGCAAAGGTGATCGTTTTCTGT

TTGAGATTTTTATCTCTTGATTCTTCAAAAGCATTCTGAGAAGGTGAGATAAGCCCTGAGTCTCAGCTAC  
CTAAGAAAAACCTGGATGTCACTGGCCACTGAGGAGCTTTGTTTCAACCAAGTCATGTGCATTTCACGT  
CAACAGAATTGTTTATTGTGACAGTTATATCTGTTGTCCCTTGACCTTGTTTCTGAAGGTTTCCTCGT  
CCCTGGGCAATTCCGCATTTAATTCATGGTATTCAGGATTACATGCATGTTTGGTTAAACCCATGAGATT  
CATTCAGTTAAAAATCCAGATGGCAAATGACCAGCAGATTCAAATCTATGGTGGTTTGACCTTTAGAGAG  
TTGCTTTACGTGGCCTGTTTCAACACAGACCCACCCAGAGCCCTCCTGCCCTCCTCCGCGGGGGCTTTC  
TCATGGCTGTCCTTCAGGGTCTTCCTGAAATGCAGTGGTGCTTACGCTCCACCAAGAAAGCAGGAAACCT  
GTGGTATGAAGCCAGACCTCCCCGGCGGGCCTCAGGGAACAGAATGATCAGACCTTTGAATGATTCTAAT  
TTTTAAGCAAAATATTATTTTATGAAAGGTTTACATTGTCAAAGTGATGAATATGGAATATCCAATCCTG  
TGCTGCTATCCTGCCAAAATCATTTTAATGGAGTCAGTTTGCAGTATGCTCCACGTGGTAAGATCCTCCA  
AGCTGCTTTAGAAGTAACAATGAAGAACGTGGACGTTTTTAATATAAAGCCTGTTTTGTCTTTTGTGTT  
GTTCAAACGGGATTCACAGAGTATTTGAAAAATGTATATATATTAAGAGGTCACGGGGGCTAATTGCTGG  
CTGGCTGCCTTTTGTGTGGGGTTTTGTTACCTGGTTTTAATAACAGTAAATGTGCCAGCCTCTTGCC  
CCAGAACTGTACAGTATTGTGGCTGCACTTGCTCTAAGAGTAGTTGATGTTGCATTTTCCTTATTGTAA  
AAACATGTTAGAAGCAATGAATGTATATAAAAGCCTCAACTAGTCATTTTTTTCTCCTCTTCTTTTTTT  
CATTATATCTAATTATTTTGCAGTTGGGCAACAGAGAACCATCCCTATTTTGTATTGAAGAGGGATTAC  
ATCTGCATCTTAACTGCTCTTTATGAATGAAAAACAGTCCTCTGTATGTACTCCTCTTTACACTGGCCA  
GGGTCAGAGTTAAATAGAGTATATGCACTTTCAAATTGGGGACAAGGGCTCTAAAAAAGCCCCAAAAG  
GAGAAGAACATCTGAGAACCTCCTCGGCCCTCCAGTCCCTCGCTGCACAAATACTCCGCAAGAGAGGCC  
AGAATGACAGCTGACAGGGTCTATGGCCATCGGGTCGTCTCCGAAGATTGGCAGGGGCAGAAAACCTG  
GCAGGCTTAAGATTTGGAATAAAGTCACAGAATTAAGGAAGCACCTCAATTTAGTTCAAACAAGACGCCA  
ACATTCTCTCCACAGCTCACTTACCTCTCTGTGTTTCAGATGTGGCCTTCCATTTATATGTGATCTTTGTT  
TTATTAGTAAATGCTTATCATCTAAAGATGTAGCTCTGGCCCAGTGGGAAAAATTAGGAAGTGATTATAA  
ATCGAGAGGAGTTATAATAATCAAGATTAAATGTAAATAATCAGGGCAATCCCAACACATGTCTAGCTTT  
CACCTCCAGGATCTATTGAGTGAACAGAATTGCAAATAGTCTCTATTTGTAATTGAACCTATCCTAAAAC

AAATAGTTTATAAATGTGAACTTAACTCTAATTAATTCCAAGTACTTTTAAGGCAGTGGCTGTTTTT  
AGACTTTCTTATCACTTATAGTTAGTAATGTACACCTACTCTATCAGAGAAAAACAGGAAAGGCTCGAAA  
TACAAGCCATTCTAAGGAAATTAGGGAGTCAGTTGAAATTCTATTCTGATCTTATTCTGTGGTGTCTTTT  
GCAGCCCAGACAAATGTGGTTACACACTTTTTAAGAAATACAATTCTACATTGTCAAGCTTATGAAGGTT  
CCAATCAGATCTTTATTGTTATTCAATTTGGATCTTTCAGGGATTTTTTTTTTAAATTATTATGGGACAA  
AGGACATTTGTTGGAGGGGTGGGAGGGAGGAAGAATTTTAAATGTAAACATTCCCAAGTTTGGATCAG  
GGAGTTGGAAGTTTTTCAGAATAACCAGAACTAAGGGTATGAAGGACCTGTATTGGGGTCGATGTGATGCC  
TCTGCGAAGAACCTTGTGTGACAAATGAGAAACATTTTGAAGTTTGTGGTACGACCTTTAGATTCCAGAG  
ACATCAGCATGGCTCAAAGTGCAGCTCCGTTTGGCAGTGCAATGGTATAAATTTCAAGCTGGATATGTCT  
AATGGGTATTTAAACAATAAATGTGCAGTTTAACTAACAGGATATTTAATGACAACCTTCTGGTTGGTA  
GGGACATCTGTTTCTAAATGTTTATTATGTACAATACAGAAAAAATTTTATAAAATTAAGCAATGTGAA  
ACTGAATTGGAGAGTGATAATAACAAGTCCTTTAGTCTTACCCAGTGAATCATTCTGTTCCATGTCTTTGG  
ACAACCATGACCTTGGACAATCATGAAATATGCATCTCACTGGATGCAAAGAAAATCAGATGGAGCATGA  
ATGGTACTGTACCGTTTCATCTGGACTGCCCCAGAAAAATAACTTCAAGCAAACATCCTATCAACAACAA  
GGTTGTTCTGCATACCAAGCTGAGCACAGAAGATGGGAACACTGGTGGAGGATGGAAAGGCTCGCTCAAT  
CAAGAAAATTCTGAGACTATTAATAAATAAGACTGTAGTGTAGATACTGAGTAAATCCATGCACCTAAAC  
CTTTTGGAAAATCTGCCGTGGGCCCTCCAGATAGCTCATTTTATTAAGTTTTTCCCTCCAAGGTAGAATT  
TGCAAGAGTGACAGTGGATTGCATTTCTTTTGGGGAAGCTTTCTTTTGGTGGTTTTGTTTATTATACCTT  
CTTAAGTTTTCAACCAAGGTTTGCTTTTGTGTTGAGTTACTGGGGTTATTTTGTGTTTAAATAAAAAATAA  
GTGTACAATAAGTGTTTTGTATTGAAAGCTTTTGTATCAAGATTTTCATACTTTTACCTTCCATGGCT  
CTTTTAAAGATTGATACTTTTAAAGAGGTGGCTGATATTCTGCAACACTGTACACATAAAAAATACGGTAA  
GGATACTTTACATGGTTAAGGTAAAGTAAGTCTCCAGTTGGCCACCATTAGCTATAATGGCACTTTGTTT  
GTGTTGTTGGAAAAAGTCACATTGCCATTAACTTTCCTTGTCTGTCTAGTTAATATTGTGAAGAAAAAT  
AAAGTACAGTGTGAGATACTG

>NM\_138578.3 Homo sapiens BCL2 like 1 (BCL2L1), transcript variant 1, mRNA

CTCGATCCGGGCGATGGAGGAGGAAGCAAGCGAGGGGGCTGGTTCCTGAGCTTCGCAATCCTGTGTCGC  
CTTCTGGGCTCCCAGCCTGCCGGGTCGCATGATCCCTCCGGCCGGAGCTGGTTTTTTTGGCAGCCACCGC  
GAGGCCGGCTGAGTTACCGGCATCCCCGAGCCACCTCCTCTCCCGACCTGTGATACAAAAGATCTTCCG  
GGGGCTGCACCTGCCTGCCTTTGCCTAAGGCGGATTTGAATCTCTTTCTCTCCCTCAGAATCTTATCTT  
GGCTTTGGATCTTAGAAGAGAATCACTAACCAGAGACGAGACTCAGTGAGTGAGCAGGTGTTTTGGACAA  
TGGACTGGTTGAGCCCATCCCTATTATAAAAAATGTCTCAGAGCAACCGGGAGCTGGTGGTTGACTTTCTC  
TCCTACAAGCTTTCCAGAAAGGATACAGCTGGAGTCAGTTTAGTGATGTGGAAGAGAACAGGACTGAGG  
CCCCAGAAGGGACTGAATCGGAGATGGAGACCCCCAGTGCCATCAATGGCAACCCATCCTGGCACCTGGC  
AGACAGCCCCGCGGTGAATGGAGCCACTGGCCACAGCAGCAGTTTGGATGCCCGGGAGGTGATCCCCATG  
GCAGCAGTAAAGCAAGCGCTGAGGGAGGCAGGCGACGAGTTTGAAGTACCGGCGGGCATTCAAGTG  
ACCTGACATCCCAGCTCCACATCACCCCAGGGACAGCATATCAGAGCTTTGAACAGGTAGTGAATGAAGT  
CTTCCGGGATGGGGTAAACTGGGGTCGCATTGTGGCCTTTTTCTCCTTCGGCGGGGCACTGTGCGTGGAA  
AGCGTAGACAAGGAGATGCAGGTATTGGTGAGTCGGATCGCAGCTTGGATGGCCACTTACCTGAATGACC  
ACCTAGAGCCTTGGATCCAGGAGAACGGCGGCTGGGATACTTTGTGGAAGTCTATGGGAACAATGCAGC  
AGCCGAGAGCCGAAAGGGCCAGGAACGCTTCAACCGCTGGTTCCTGACGGGCATGACTGTGGCCGGCGTG  
GTTCTGCTGGGCTCACTCTTCAGTCGGAATGACCAGACACTGACCATCCACTCTACCCTCCCACCCCT  
TCTCTGCTCCACCACATCCTCCGTCCAGCCGCCATTGCCACCAGGAGAACCACTACATGCAGCCCATGCC  
CACCTGCCCATCACAGGGTTGGGCCAGATCTGGTCCCTTGACGCTAGTTTTCTAGAATTTATCACACTT  
CTGTGAGACCCCCACACCTCAGTTCCTTGGCCTCAGAATTCACAAAATTTCCACAAAATCTGTCCAAAG  
GAGGCTGGCAGGTATGGAAGGGTTTGTGGCTGGGGCAGGAGGGCCCTACCTGATTGGTGCAACCCTTAC  
CCCTTAGCCTCCCTGAAAATGTTTTCTGCCAGGGAGCTTGAAAGTTTTCAGAACCTCTCCCCAGAAAG  
GAGACTAGATTGCCTTTGTTTTGATGTTTGTGGCTCAGAATTGATCATTTTCCCCCACTCTCCCCACA

CTAACCTGGGTTCCTTTCTTCCATCCCTACCCCTAAGAGCCATTTAGGGGCCACTTTTGACTAGGGA  
TTCAGGCTGCTTGGGATAAAGATGCAAGGACCAGGACTCCCTCCTCACCTCTGGACTGGCTAGAGTCCTC  
ACTCCCAGTCCAAATGTCCTCCAGAAGCCTCTGGCTAGAGGCCAGCCCCACCCAGGAGGGAGGGGGCTAT  
AGCTACAGGAAGCACCCCATGCCAAAGCTAGGGTGGCCCTTGCAAGTTCAGCACCCACCTAGTCCCTTCCC  
CTCCCTGGCTCCCATGACCATACTGAGGGACCACTGGGCCCAAGACAGATGCCCCAGAGCTGTTTATGG  
CCTCAGCTGCCTCACTTCCTACAAGAGCAGCCTGTGGCATCTTTGCCTTGGGCTGCTCCTCATGGTGGGT  
TCAGGGGACTCAGCCCTGAGGTGAAAGGGAGCTATCAGGAACAGCTATGGGAGCCCCAGGGTCTTCCCTA  
CCTCAGGCAGGAAGGGCAGGAAGGAGAGCCTGCTGCATGGGGTGGGGTAGGGCTGACTAGAAGGGCCAGT  
CCTGCCTGGCCAGGCAGATCTGTGCCCCATGCCTGTCCAGCCTGGGCAGCCAGGCTGCCAAGGCCAGAGT  
GGCCTGGCCAGGAGCTCTTCAGGCCTCCCTCTCTTCTGCTCCACCCTTGGCCTGTCTCATCCCCAGGG  
GTCCCAGCCACCCCGGGCTCTGCTGTACATATTTGAGACTAGTTTTTATTCCTTGTGAAGATGATATA  
CTATTTTTGTTAAGCGTGTCTGTATTTATGTGTGAGGAGCTGCTGGCTTGCAGTGCGCGTGACGTGGAG  
AGCTGGTGCCCGGAGATTGGACGGCCTGATGCTCCCTCCCCTGCCCTGGTCCAGGGAAGCTGGCCGAGGG  
TCCTGGCTCCTGAGGGGCATCTGCCCCTCCCCAACCCCCACCCACACTTGTTCCAGCTCTTTGAAATA  
GTCTGTGTGAAGGTGAAAGTGCAGTTCAGTAATAAACTGTGTTTACTCAGTGAA

>NM\_003766.5 Homo sapiens beclin 1 (BECN1), transcript variant 1, mRNA

CGGCGGCTACCGGGAAGTCGCTGAAGACAGAGCGATGGTAGTTCTGGAGGCCTCGCTCCGGGGCCGACCC  
GAGGCCACAGTGCCTCCGCGGTAGACCGGACTTGGGTGACGGGCTCCGGGCTCCCGAGGTGAAGAGCATC  
GGGGGCTGAGGGATGGAAGGGTCTAAGACGTCCAACAACAGCACCATGCAGGTGAGCTTCGTGTGCCAGC  
GCTGCAGCCAGCCCCTGAAACTGGACACGAGTTTCAAGATCCTGGACCGTGTCACCATCCAGGAACTCAC  
AGCTCCATTACTTACCACAGCCCAGGCGAAACCAGGAGAGACCCAGGAGGAAGAGACTAACTCAGGAGAG  
GAGCCATTTATTGAAACTCCTCGCCAGGATGGTGTCTCTCGCAGATTCATCCCCCAGCCAGGATGATGT

CCACAGAAAGTGCCAACAGCTTCACTCTGATTGGGGAGGCATCTGATGGCGGCACCATGGAGAACCTCAG  
CCGAAGACTGAAGGTCACTGGGGACCTTTTTGACATCATGTCTGGGCCAGACAGATGTGGATCACCCACTC  
TGTGAGGAATGCACAGATACTCTTTTAGACCAGCTGGACACTCAGCTCAACGTCACTGAAAATGAGTGTC  
AGAACTACAAACGCTGTTTGGAGATCTTAGAGCAAATGAATGAGGATGACAGTGAACAGTTACAGATGGA  
GCTAAAGGAGCTGGCACTAGAGGAGGAGAGGCTGATCCAGGAGCTGGAAGACGTGGAAAAGAACCGCAAG  
ATAGTGGCAGAAAATCTCGAGAAGGTCCAGGCTGAGGCTGAGAGACTGGATCAGGAGGAAGCTCAGTATC  
AGAGAGAATACAGTGAATTTAAACGACAGCAGCTGGAGCTGGATGATGAGCTGAAGAGTGTTGAAAACCA  
GATGCGTTATGCCCAGACGCAGCTGGATAAGCTGAAGAAAACCAACGTCTTTAATGCAACCTTCCACATC  
TGGCACAGTGGACAGTTTGGCACAATCAATAACTTCAGGCTGGGTCTGCCTGCCCAGTGTTCCCGTGGAAT  
GGAATGAGATTAATGCTGCTTGGGGCCAGACTGTGTTGCTGCTCCATGCTCTGGCCAATAAGATGGGTCT  
GAAATTTAGAGATACCGACTTGTTCTTACGGAAACCATTATATCTGGAGTCTCTGACAGACAAATCT  
AAGGAGCTGCCGTTATACTGTTCTGGGGGGTTGCGGTTTTCTGGGACAACAAGTTTGACCATGCAATGG  
TGGCTTTCCTGGACTGTGTGCAGCAGTTCAAAGAAGAGGTTGAGAAAGGCGAGACACGTTTTTGTCTTCC  
CTACAGGATGGATGTGGAGAAAGGCAAGATTGAAGACACAGGAGGCAGTGGCGGCTCCTATTCCATCAAA  
ACCCAGTTTAACTCTGAGGAGCAGTGGACAAAAGCTCTCAAGTTCATGCTGACGAATCTTAAGTGGGGTC  
TTGCTTGGGTGTCCTCACAATTTTATAACAAATGACTTTTTCTTAGGGGGAGGTTTGCCTTAAAGGCT  
TTTAATTTTGTGTTTGTGCAAACATGTTTTAAATTAATTCGGGTAATATTAACAGTACATGTTTACA  
ATACCAAAAAAGAAAAATCCACAAAAGCCACTTTATTTTAAAAATATCATGTGACAGATACTTTCCAGAG  
CTACAACATGCCATCTATAGTTGCCAGCCCTGGTCAGTTTTGATTCTTAACCCCATGGACTCCTTTCCCT  
TTCTTCTCTGAAAAAACTAATTTAAATTTGCTTTTCTTTTTTTAACTGAGTTGAATTGAGATTGATGT  
GTTTTCACTGGATTTTTATCTCTCAACTTCTGCACTTAACAATATGAAATAGAACTTTTGTCTTTA  
CTGAGATGAGGATATGTTTGAGATGCACAGTTGGATAATGTGGGAAAATGACATCTAAGCTTTACCTGGT  
CACCATGTGATGTGATCAGATGCTTGAAATTTAACTTTTCACTTGGTTCTTATACTGAATGCCGACTC  
TGCTCTGTGTTAGAGATATGAAATGGTGTTTGATACTGTTTGAGACATTATGGAGAGATTTAATTATTTG  
TAATAAAAGATTTGCTGCAGTCTGAAAACCTG

>NM\_001290693.1 Homo sapiens beclin 2 (BECN2), mRNA

ATGTCTTCATCCGCTTCCTGTGCCAGCGCTGCCACCAGGCCCTGAAGCTGAGCGGCTCCTCGGAGTCTA  
GGAGCCTCCCTGCAGCCCCGGCGCCACCTCTGGGCAGGCTGAGCCCGGAGACACCCGGGAGCCCGGCGT  
CACCACCAGGGAGGTGACAGACGCTGAGGAGCAACAGGACGGTGCCTCTAGCAGATCCCCTCCAGGCGAT  
GGCAGTGTGTCCAAGGGCCATGCCAACATCTTCACCCTGCTGGGGGAGCTTGGCGCCATGCACATGCTCA  
GTAGCATCCAGAAGGCAGCTGGTGACATTTTTGACATAGTCTCTGGCCAAGCAGTTGTGGACCATCCCCT  
GTGTGAAGAATGCACCGACAGTCTTTTAGAGCAGCTGGACATCCAGCTCGCTCTCACAGAAGCTGACAGT  
CAGAACTACCAACGCTGCCTGGAGACCGGGGAGCTGGCGACCAGCGAGGACGAGGCGGCGGCGCTGCGGG  
CGGAGCTGCGGGACCTGGAGCTGGAGGAGGCCAGGCTGGTGCAGGAGCTGGAGGATGTGGACAGGAACAA  
TGCAAGAGCAGCGGCGGATCTCCAGGCAGCCCAGGCAGAGGCTGCGGAGCTGGACCAGCAGGAGAGGCAG  
CACTACAGGGACTACAGTGCCTTGAAGCGGCAGCAGCTGGAACTGCTTGATCAGCTGGGGAACGTGGAGA  
ACCAGCTGCAGTATGCCAGGGTCCAGAGGGACCGGCTGAAGGAAATCAACTGTTTCACCGCCACGTTTGA  
GATCTGGGTGGAGGGCCCCCTTGGGCGTCATCAATAACTTCAGGTTGGGCCGCCTCCCCACTGTCCGTGTG  
GGCTGGAATGAGATTAACACTGCCTGGGGACAGGCGGCCTTGCTGCTCCTTACCCTGGCCAATACAATTG  
GACTGCAGTTTCAGAGGTATCGACTCATCCCCTGCGGAAACCATTTCGTATCTGAAGTCTTTAACAGATGA  
CCGCACTGAGCTGCCGTTGTTCTGTTATGGGGGGCAGGATGTTTTCTCAATAACAAGTATGACCGCGCG  
ATGGTGGCCTTCCTGGACTGCATGCAGCAGTTCAAGGAAGAGGCTGAGAAGGGTGAGCTGGGCCTCTCTC  
TGCCCTACGGGATCCAGGTGGAGACAGGCCTGATGGAGGACGTTGGCGGCCGAGGGGAATGCTATTCCAT  
CAGAACCCATCTGAACACGCAGGAGCTGTGGACAAAGGCACTCAAGTTCATGCTTATAAATTTCAAGTGG  
AGTCTCATCTGGGTTGCCTCAAGGTATCAAAAGTAG

>NM\_197966.3 Homo sapiens BH3 interacting domain death agonist (BID), transcript variant 1, mRNA

ACCCTTGCCGGCGGATCGGAATCCCCGCCACACCGTGGTCTTTCCAGCACCGCAGACACCTGCCGGCTC  
CTCCCGAGCGGAGCTCAGGGCTGACAAAGCGCGGTGAGAGCGGCCGCTTACTGGGGCTCGCCCGCTCCTT  
AGAGCACTGGCAATGATGTGCGGATCCTCGCTGCTGCTGCTGGGAACTGTTGAGTGGCTGAATGACCCC  
AGGGGACCCTGGGAGAGCTCTGAAGCCCTCAGCCACCAAGTGGCTGGGCTGGCAAGGGTTCATTTCATTCA  
TTCAACAAATACGAATGTGCAGCGGTGCTGGGGTCATGATGGCTCGGTGGGCAGCGAGGGGGCCGGGCCGG  
CTGGAGGAGCACAGTGCGGATTCTGTCGCCACTGGGACACTGTGAACCAGGAGTGAGTCGGAGCTGCCGC  
GCTGCCCAGGCCATGGACTGTGAGGTCAACAACGGTTCAGCCTCAGGGATGAGTGCATCACAAACCTAC  
TGGTGTTTGGCTTCCTCCAAAGCTGTTCTGACAACAGCTTCCGCAGAGAGCTGGACGCACTGGGCCACGA  
GCTGCCAGTGCTGGCTCCCCAGTGGGAGGGCTACGATGAGCTGCAGACTGATGGCAACCGCAGCAGCCAC  
TCCCGCTTGGGAAGAATAGAGGCAGATTCTGAAAGTCAAGAAGACATCATCCGGAATATTGCCAGGCACC  
TCGCCCAGGTCGGGGACAGCATGGACCGTAGCATCCCTCCGGGCCTGGTGAACGGCCTGGCCCTGCAGCT  
CAGGAACACCAGCCGGTCGGAGGAGGACCGGAACAGGGACCTGGCCACTGCCCTGGAGCAGCTGCTGCAG  
GCCTACCCTAGAGACATGGAGAAGGAGAAGACCATGCTGGTGCTGGCCCTGCTGCTGGCCAAGAAGGTGG  
CCAGTCACACGCCGTCCTTGCTCCGTGATGTCTTTACACAACAGTGAATTTTATTAACCAGAACCTACG  
CACCTACGTGAGGAGCTTAGCCAGAAATGGGATGGACTGAACGGACAGTTCAGAAGTGTGACTGGCTAA  
AGCTCGATGTGGTCACAGCTGTATAGCTGCTTCCAGTGTAGACGGAGCCCTGGCATGTCAACAGCGTTCC  
TAGAGAAGACAGGCTGGAAGATAGCTGTGACTTCTATTTTAAAGACAATGTTAAACTTATAACCCACTTT  
AAAATATCTACATTAATATACTTGAATGAAAATGTCCATTTACACGATTTGAATGGCCTTCATATCATC  
CACACATGAATCTGCACATCTGTAAATCTACACACGGTGCCTTTATTTCCACTGTGCAGGTTCCCACTTA  
AAAATTAAATTGGAAAGCAGGTTTCAAGGAAGTAGAAACAAAATACAATTTTTTTGGTAAAAAAAATTA  
CTGTTTATTAAAGTACAACCATAGAGGATGGTCTTACAGCAGGCAGTATCCTGTTTGAGGAAAGCAAGAA  
TCAGAGAAGGAACATACCCCTTACAAATGAAAAATTCCACTCAAATAGGGACTATCTATCTTAATACTA

AGGAACCAACAATCTTCTGTTTAAAAAACCACATGGCACAGAGATTCTGAACTAAAGTGCTGCACTCAA  
ATGATGGGAAGTCCGGCCCCAGTACACAGGGGCTTGACTTTTTCAACTTCGTTTCCTTTGTTGGAGTCAA  
AAAGAACCACTTGTGGTTCTAAAAGGTGTGAAGGTGATTTAAGGGCCCAGGTCAGCCACTGTTTGTTTAC  
AAAATCAGGTAATACTGCATACACTTTTTCTCTTCCATGACATCAAGACTTTGCTAAAGACATGAAG  
CCACGGGTGCCAGAAGCTACTGCGATGCCCCGGGAGTTAGCCCCCTGGTAATAGCTGTAAACTTCCAATT  
TCTAGCCATACGCTCAGCTCATCCATGCCTCAGAAGTGCATCTGGAGAGAACAGGTTTCTAAGCATAAAA  
GATGAAAGAGCAGTTGGACTTTTTAAAAATTAGCAAAGTGGTTCCTCTCTTAGGGACAGTCAAACCA  
AGTCACTTAGGTAGTACCAAATAAATAAGGAAAAGCTTAGCTTTAGAAACAGTGCAAACTGGTCTGCT  
GTTCCAGTGGTAAGCTATGTCCAGGAATCAGTTTAAAAGCACGACAGTGGATGCTGGGTCCATATCACA  
CACATTGCTGTGAACAGGAACTCCTGTGACCACAACATGAGGCCACTGGAGACGCATATGAGTAAGGGC  
ACTGACGGACTCATGATTTCTTCTTACCAGATGCTTTCCTGTTCTTTAAGAGTTTAAAATCATCAGAAAG  
GAAAAACAACTCTATATTGTTGAGCATGCAATACATACCACGCTAGGGCTGGCTCAATTGAAAGTGGGC  
AAAAGCTTACAAATACTAAAAAGAAGTGCTGCCGCGCAGTGTGGAGGCCACTGTTTGAAATAAATCTTC  
CTAACTACTACGA

>NM\_001168.3 Homo sapiens baculoviral IAP repeat containing 5 (BIRC5), transcript variant 1, mRNA

GCGGCGCGCCATTAACCGCCAGATTTGAATCGCGGGACCCGTTGGCAGAGGTGGCGGCGCGGCATGGGT  
GCCCCGACGTTGCCCCCTGCCTGGCAGCCCTTCTCAAGGACCACGCATCTCTACATTCAAGAACTGGC  
CCTTCTTGAGGGCTGCGCCTGCACCCCGGAGCGGATGGCCGAGGCTGGCTTCATCCACTGCCCCACTGA  
GAACGAGCCAGACTTGCCCCAGTGTTTCTTCTGCTTCAAGGAGCTGGAAGGCTGGGAGCCAGATGACGAC  
CCCATAGAGGAACATAAAAAGCATTTCGTCCGGTTGCGCTTTCCTTTCTGTCAAGAAGCAGTTTGAAGAAT  
TAACCCTTGGTGAATTTTTGAACTGGACAGAGAAAGAGCCAAGAACAATTGCAAAGGAAACCAACAA  
TAAGAAGAAAGAATTTGAGGAACTGCGGAGAAAGTGCGCCGTGCCATCGAGCAGCTGGCTGCCATGGAT

TGAGGCCTCTGGCCGGAGCTGCCTGGTCCCAGAGTGGCTGCACCACTTCCAGGGTTTATTCCCTGGTGCC  
ACCAGCCTTCTGTGGGCCCTTAGCAATGTCTTAGGAAAGGAGATCAACATTTTCAAATTAGATGTTTC  
AACTGTGCTCTTGTTTTGTCTTGAAAGTGGCACCAGAGGTGCTTCTGCCTGTGCAGCGGGTGCTGCTGGT  
AACAGTGGCTGCTTCTCTCTCTCTCTCTTTTTTGGGGGCTCATTTTTGCTGTTTTGATTCCCGGGCTT  
ACCAGGTGAGAAGTGAGGGAGGAAGAAGGCAGTGTCCCTTTTGCTAGAGCTGACAGCTTTGTTGCGGTGG  
GCAGAGCCTTCCACAGTGAATGTGTCTGGACCTCATGTTGTTGAGGCTGTCACAGTCCTGAGTGTGGACT  
TGGCAGGTGCCTGTTGAATCTGAGCTGCAGGTTCTTATCTGTCACACCTGTGCCTCCTCAGAGGACAGT  
TTTTTTGTTGTTGTGTTTTTTGTTTTTTTTTTTTTGGTAGATGCATGACTTGTGTGTGATGAGAGAATG  
GAGACAGAGTCCCTGGCTCCTCTACTGTTTAACAACATGGCTTTCTTATTTTGTGTTGAATTGTTAATTCA  
CAGAATAGCACAACTACAATTAATAAAGCACAAGCCATTCTAAGTCATTGGGGAAACGGGGTGAAC  
TTCAGGTGGATGAGGAGACAGAATAGAGTGATAGGAAGCGTCTGGCAGATACTCCTTTTGCCACTGCTGT  
GTGATTAGACAGGCCAGTGAGCCGCGGGGCACATGCTGGCCGCTCCTCCCTCAGAAAAAGGCAGTGGCC  
TAAATCCTTTTAAATGACTTGGCTCGATGCTGTGGGGGACTGGCTGGGCTGCTGCAGGCCGTGTGTCTG  
TCAGCCCAACCTTCACATCTGTACGTTCTCCACACGGGGGAGAGACGCAGTCCGCCCAGGTCCCCGCTT  
TCTTTGGAGGCAGCAGCTCCCGCAGGGCTGAAGTCTGGCGTAAGATGATGGATTTGATTCGCCCTCCTCC  
CTGTCATAGAGCTGCAGGGTGGATTGTTACAGCTTCGCTGGAAACCTCTGGAGGTCATCTCGGCTGTTCC  
TGAGAAATAAAAAGCCTGTCATTTCAAACACTGCTGTGGACCCTACTGGGTTTTTAAATATTGTCAGTT  
TTTCATCGTCGTCCCTAGCCTGCCAACAGCCATCTGCCAGACAGCCGCAGTGAGGATGAGCGTCTGGC  
AGAGACGCAGTTGTCTCTGGGCGCTTGCCAGAGCCACGAACCCAGACCTGTTTGTATCATCCGGGCTCC  
TTCCGGGCAGAAACAACTGAAAATGCACTTCAGACCCACTTATTTCTGCCACATCTGAGTCGGCCTGAGA  
TAGACTTTTCCCTCTAACTGGGAGAATATCACAGTGGTTTTTTGTTAGCAGAAAATGCACTCCAGCCTCT  
GTACTCATCTAAGCTGCTTATTTTTGATATTTGTGTCAGTCTGTAAATGGATACTTCACTTTAATAACTG  
TTGCTTAGTAATTGGCTTTGTAGAGAAGCTGGAAAAAATGGTTTTGTCTTCAACTCCTTTGCATGCCAG  
GCGGTGATGTGGATCTCGGCTTCTGTGAGCCTGTGCTGTGGGCAGGGCTGAGCTGGAGCCGCCCTCTCA  
GCCCGCCTGCCACGGCCTTTCCTTAAAGGCCATCCTTAAACCAGACCTCATGGCTACCAGCACCTGAA

AGCTTCCTCGACATCTGTTAATAAAGCCGTAGGCCCTTGTCTAAGTGCAACCGCCTAGACTTTCTTTCAG  
ATACATGTCCACATGTCCATTTTTTCAGGTTCTCTAAGTTGGAGTGGAGTCTGGGAAGGGTTGTGAATGAG  
GCTTCTGGGCTATGGGTGAGGTTCCAATGGCAGGTTAGAGCCCCCTCGGGCCAACTGCCATCCTGGAAAGT  
AGAGACAGCAGTGCCCGCTGCCCAGAAGAGACCAGCAAGCCAACTGGAGCCCCCATTGCAGGCTGTCGC  
CATGTGGAAAGAGTAACTCACAATTGCCAATAAAGTCTCATGTGGTTTTATCTA

>NM\_016252.4 Homo sapiens baculoviral IAP repeat containing 6 (BIRC6), transcript variant 1, mRNA

CTCCCTCCCTGCTTCTCCCCCTCTCCCGTCAGCCTCCCTCCGAGTTTGGCCCCCTCCGGCCGGGCGATCGA  
CGTTCCGCGTGCGTGCGGGCGCCTGACTTCACTTCCGGCTAACGCGCTCGGCTTGCCCCCTGGCCCCGGA  
TGGTGA CTGGTGGTGGTGCTGCACCTCCCGGGACTGTCACTGAGCCGCTTCCCAGTGTGATTGTGCTGAG  
CGCAGGCCGGAAGATGGCGGCTGCGGCTGCGGCGGCCTCGGGCCCCGGCTGCTCCTCGGCGGCGGGGGCG  
GGGGCGGCCGGGGTCTCAGAGTGGCTGGTGCTGCGGGACGGCTGCATGCACTGCGACGCCGACGGGCTGC  
ACAGCCTGTCCTACCACCCTGCGCTCAACGCCATCCTGGCCGTCACTAGCCGCGGGACCATCAAAGTCAT  
CGACGGCACCTCGGGGGCCCACTGCAGGCCTCCGCGCTCAGTGCTAAACCAGGTGGACAGGTGAAATGT  
CAGTATATCTCTGCTGTGGATAAAGTTATATTTGTGGATGATTATGCAGTAGGGTGTAGGAAGGACCTTA  
ATGGAATCTTGTTGTTAGACACTGCTCTGCAAACCTCCAGTTTCAAAGCAGGATGATGTGGTTCAGCTTGA  
ATTACCCGTTACAGAGGCACAGCAGCTCTTATCAGCATGTTTAGAAAAGGTAGATATTTCTAGTACAGAG  
GGTTATGATTTGTTTCATCACACAGCTCAAAGATGGTTTAAAAAATACATCTCATGAGACTGCAGCAAACC  
ACAAAGTTGCTAAGTGGGCCACAGTTACATTTTCATCTTCCTCATCATGTGTTGAAGTCCATTGCCAGTGC  
CATTGTAAATGAACTCAAGAAAATAAATCAAATGTTGCTGCCTTACCTGTGGCGTCCTCAGTGATGGAC  
AGATTGTCTTACCTCTTACCTAGTGACGTCCAGAACTCGGAGTGGGGCCAGGCCGTTCTGTAGACAGAT  
CACTGATGTATAGTGAAGCTAACAGACGGGAGACATTTACCTCATGGCCTCATGTAGGCTATAGGTGGGC  
ACAACCAGATCCCATGGCTCAAGCTGGATTTTATCATCAGCCTGCCTCATCTGGAGATGATAGAGCCATG

TGTTTTACTTGTAGTGTATGCCTCGTTTGTTGGGAACCTACTGATGAACCTGGTCTGAACACGAAAGAC  
ATTCCCCAACTGCCATTTGTGAAAGGTGAGCACACACAGAATGTGCCATTGTCAGTCACTCTTGCAAC  
AAGTCCTGCACAGTTTCCTTGTACGGATGGAAGTACAGAATATCTTGCTTTGGGTCGGGGAGCTGCCCT  
CATTTTCTAGCTGCTGCAACTAAACGAGGAAAGATCTGCATATGGGATGTTTCCAACTTATGAAGGTGC  
ACTTAAAGTTTGAAATTAATGCCTATGATCCAGCAATTGTACAACAGCTTATTCTATCAGGAGACCCAAG  
CTCAGGAGTTGATTCAAGGAGACCAACTTTGGCGTGGCTGGAGGACTCCTCTAGTTGCTCAGATATACCA  
AAATTGGAAGGAGATAGTGTATGATTTACTGGAGGATTCAGACAGTGAAGAGCATTCCAGATCAGATTCTG  
TGACAGGGCATAACATCACAGAAGGAAGCCATGGAAGTAAGCCTTGATATAACAGCACTCAGCATTCTCCA  
ACAGCCAGAAAACTTCAGTGGGAGATTGTTGCAAATGTGCTTGAAGATACTGTTAAGGATCTTGAAGAA  
CTTGGGGCAAATCCTTGTTTAACAACTCTAAGAGTGAAAAGACAAAGGAAAAGCACCAGGAGCAACACA  
ACATTCCTTTTCCATGTTTATTAGCTGGAGGTTTATTAACATATAAATCTCCTGCTACCTCACCCATTAG  
TAGTAATTCTCACAGGTCACTGGATGGTTTAAGCAGAACTCAGGGTGAAAGTATATCAGAACAAGGGTCA  
ACTGACAATGAATCCTGCACTAATTCAGAACTAAATTCTCCTCTGGTAAGGAGGACTTTACCGGTTTTGC  
TTCTTTATAGCATCAAGGAATCTGATGAGAAAGCAGGAAAGATCTTTTCACAGATGAACAATATTATGAG  
TAAAAGTTTGCATGATGATGGTTTTACTGTTCCACAGATTATTGAAATGGAGCTGGATAGTCAGGAGCAG  
TTGTTATTGCAGGATCCTCCTGTGACTTACATTCAGCAATTTGCAGATGCAGCAGCCAACCTTACCTCTC  
CGGATTCTGAGAAGTGGAAGTCTGTGTTTCCCAAGCCTGGGACTTTGGTTCAGTGCTTGAGGCTGCCAAA  
GTTTGCAGAGGAGGAGAATCTTTGTATAGACTCAATAACTCCTTGTGCTGACGGAATTCATTTGTTGGTA  
GGACTGCGGACATGCCCTGTTGAATCCTTGAGTGCAATAAATCAAGTAGAGGCCTTGAATAATTTAATA  
AATTAACTCTGCACTATGTAATAGACGGAAGGTGAGCTGGAATCAAATCTTGCTGTAGTGAATGGTGC  
AAATATTAGTGAATCCAACATGAATCACCAGCAGATGTACAGACTCCTTTAATAATTACGCCTGAGCAG  
AGGAATGTTAGTGGTGGATATTTAGTGCTTTATAAAATGAATTATGCCACTCGGATAGTGACTTTAGAAG  
AGGAGCCAATAAAAAATACAACATATCAAAGATCCCCAGGACACAATTACCTCGCTCATTTTGCTTCCACC  
CGATATATTGGATAATCGAGAGGATGACTGTGAGGAACCTATTGAGGACATGCAGTTAACCTCAAAGAAT  
GGTTTTGAGAGAGAAAAAACGTCTGACATTTCTACTCTGGACACCTGGTAATAACCACTCAGGGAGGAT

ATGTAAAAATACTAGATCTTTCAAACCTTTGAAATTTTGGCCAAAGTGGAGCCTCCCAAAAAGGAGGGCAC  
TGAGGAACAGGACACATTTGTTTCTGTGATTTACTGTTCTGGCACAGACAGGCTGTGTGCATGCACCAAA  
GGTGGTGAGCTTCATTTTCTCCAAATTGGAGGAACCTGTGATGATATTGATGAAGCTGATATACTAGTGG  
ATGGATCTCTTTCTAAAGGAATAGAACCATCTTCAGAAGGTTCCAAACCTTTATCAAATCCTTCAAGTCC  
TGGCATTTCAGGAGTTGATTTATTGGTGGACCAGCCATTCACCCTTGAAATCTTGACATCCCTAGTGGAG  
CTAACCCGCTTTGAGACTTTGACTCCAAGGTTTTTCAGCGACTGTTCTCCATGCTGGGTAGAAGTTCAAC  
AAGAACAGCAGCAAAGGAGGCATCCTCAACATTTGCATCAGCAACACCATGGTGATGCTGCTCAGCATAC  
TCGAACTTGAAACTACAGACCGACAGCAACAGCTGGGATGAACATGTATTTGAATTAGTACTACCTAAA  
GCTTGTATGGTTGGACATGTGGACTTCAAATTCGTTTTGAACTCAAACATCACCAATATTCCACAGATAC  
AAGTGACACTGCTGAAAAATAAAGCTCCAGGATTAGGGAAAGTCAATGCTCTTAACATTGAAGTGGAACA  
AAATGGGAAACCGTCCCTGGTTGATTTGAATGAAGAAATGCAGCACATGGATGTAGAGGAATCACAGTGT  
CTTAGATTATGTCCATTTTTGGAGGATCATAAAGAAGACATTCTATGTGGGCCAGTATGGCTTGCTAGTG  
GCCTTGATCTATCAGGGCATGCTGGAATGTTGACGTTAACAAGCCCCAACTTGTTAAAGGTATGGCAGG  
AGGAAAATATCGTTCGTTTTTAATCCATGTCAAGGCAGTGAATGAAAGAGGAACAGAAGAGATTTGTAAT  
GGTGGTATGCGTCCTGTAGTAAGGCTTCCATCCCTAAAACACCAGAGTAACAAGGGTTATTCACCTTGCTT  
CACTTTTGGCTAAAGTTGCAGCAGGCAAGGAAAAATCATCTAATGTTAAGAATGAAAATACAAGTGGCAC  
CCGTAAATCTGAAAACCTCCGGGGCTGTGATTTACTTCAAGAGGTCTCAGTCACCATTCTGAAGATTTAAG  
AAAACCTCAATTTCTAAGGAAAGAGTGCAACGATGTGCCATGTTACAGTTTTTCAGAATTTTCATGAGAAGC  
TTCTTAATACTCTTTGCAGAAAAACAGATGATGGCCAGATCACAGAACATGCCAGAGCCTTGTGTTGGA  
TACTCTCTGTTGGTTAGCTGGAGTTCATTCAAATGGACCCGGAAGCTCAAAGGAAGGAAATGAGAACCTA  
CTTCAAAAACACGAAAATTTCTGTCAGACATCGTACGTGTTTGCTTCTTTGAGGCAGGACGAAGTATAG  
CCCATAAGTGTGCCCCGATTTCTAGCCTTGTGCATTAGTAATGGCAAATGTGACCCATGTCAACCAGCATT  
TGGACCTGTTCTGTTGAAGGCTTTACTTGATAATATGTCATTTTTACCTGCAGCAACAACTGGTGGTTCT  
GTCTATTGGTATTTTGTCTTACTGAATTATGTGAAAGATGAAGATCTGGCTGGATGCAGTACAGCTTGTG  
CATCTTTGCTTACTGCAGTGTCCAGACAGTTACAGGACAGGCTAACACCAATGGAGGCTTTACTTCAGAC

AAGATATGGATTATATAGCTCACCATTGATCCAGTCCTCTTTGATTTGGAGATGAGTGGCTCTTCTGT  
AAAAATGTTTATAACAGCAGCATTGGTGTCCAGTCAGATGAAATTGATTTATCAGATGTCCTTTCAGGAA  
ATGGAAAGGTCAGTAGTTGCACAGCTGCTGAGGGTAGTTTCACATCTCTCACTGGACTTTTGGAAGTTGA  
ACCTCTGCACTTTACTTGTGTGTCAACTAGTGATGGAACCAGAATAGAAAGGGATGATGCAATGAGTTCC  
TTCGGGGTTACTCCTGCAGTAGGTGGACTATCATCTGGGACAGTTGGGGAAGCCTCGACAGCCCTGAGTT  
CAGCAGCCCAGGTAGCTTTGCAGTCTCTCTCATGCAATGGCTTCAGCCGAGCAACAGCTACAGGTGCT  
GCAAGAGAAACAGCAGCAGCTTTGAAGCTTCAGCAACAGAAAGCAAAGCTGGAAGCCAAGTTACATCAG  
ACAACAGCTGCAGCAGCTGCAGCAGCATCAGCAGTAGGTCCTGTTCACTCTGTGCCTTCCAACCCAG  
TGGCTGCCCCTGGATTCTTCATTCATCCATCTGATGTTATCCACCCACTCCAAAAACAACACCTCTTTT  
TATGACTCCACCACTCACTCCACCCAATGAAGCAGTTTCCGTTGTGATTAATGCCGAAGTTGCACAGCTT  
TTCCCAGGCTCAGTCATTGATCCCCCAGCAGTCAATCTTGCTGCACATAACAAAAATTCCAACAAGTCCA  
GAATGAATCCACTTGGTTCTGGTCTAGCCCTTGCAATTTCTCATGCTTCACATTTTCTCAACCTCCGCC  
TCACCAGTCCATTATTATAGAGCGAATGCATTGAGGAGCAAGAAGATTTGTGACCTTGGATTTTGGGAGG  
CCTATATTGTTGACTGATGTATTGATTCCCACTTGTGGAGACTTGGCCTCTTTGTCAATTGACATTTGGA  
CATTAGGAGAAGAGGTGGATGGAAGGCGGTTGGTAGTGGCAACTGATATAAGCACTCATTCACTAATTCT  
TCATGACTTAATACCACCTCCCGTGTGCAGATTCATGAAGATCACTGTTATTGGACGTTACGGGAGTACA  
AATGCCAGAGCCAAAATCCCATTAGGATTTTACTATGGTCATACCTACATCTTGCCTTGGGAAAGTGAAC  
TGAAGTTAATGCATGATCCTCTAAAGGGAGAGGGAGAATCTGCAAACCAGCCAGAAATTGACCAGCATTT  
AGCAATGATGGTTGCTTTGCAGGAGGATATACAGTGCAGGTATAACTTGGCTTGTGATCGTCTGGAAACC  
CTTTTGCAAAGTATTGATCTTCTCCTCTAAACAGTGCTAACAATGCACAGTACTTTTTACGAAAACCAG  
ATAAGGCAGTTGAGGAAGACAGTAGGGTTTTTCTGCTTATCAAGATTGTATTGAGCTACAGCTTCAACT  
AAATTTGGCTCATAATGCAGTGCAGAGGCTCAAAGTGGCGCTAGGTGCAAGCCGGAAGATGTTGAGTGAA  
ACATCAAATCCAGAAGATTTAATTCAGACATCTTCCACAGAGCAGTTACGTACTATCATCAGATATTTAC  
TGGACACTTTGCTCAGCCTGCTTCATGCTTCTAATGGACACTCTGTTCTGCACTTTTGCAGAGCACATT  
TCATGCCCAGGCCTGTGAAGAGCTCTTTAAACACTTGTGCATCAGTGGAACCCCAAAGATACGGTTACAT

ACTGGTCTTCTTCTTGTCAACTGTGTGGTGGTGAAAGGTGGTGGGGTCAATTTCTTTCTAATGTCCTTC  
AGGAATTGTACAATTCGGAACAGCTTCTCATCTTTCCACAGGATAGGGTCTTCATGTTACTTTCTGCAT  
TGGTCAAAGATCACTTAGTAATAGTGGAGTATTAGAAAGCTTACTTAATCTCTTGGATAATTTATTGTCA  
CCTCTTCAGCCACAGTTACCCATGCATAGGAGGACAGAAGGAGTACTAGATATTCCCATGATCAGTTGGG  
TTGTTATGCTGGTGTCCAGGTTGCTGGATTATGTGGCAACTGTTGAAGATGAAGCAGCAGCTGCAAAGAA  
ACCTTTGAATGGTAATCAGTGGAGTTTTATTAACAATAATCTACACACTCAGAGCTTAAATAGATCTTCT  
AAAGGCAGCAGTAGCCTTGATAGATTATATTCCAGAAAAATCAGAAAGCAGCTTGTTTCATCATAAACAGC  
AACTTAACCTACTAAAAGCAAAGCAGAAGGCATTGGTAGAACAGATGGAAAAAGAAAAAATACAAAGTAA  
CAAAGGATCATCATATAAACTCCTGGTAGAACAAGCAAACTAAAGCAGGCCACTTCAAAGCACTTTAAG  
GATTTAATTCGTTTACGTCGGACAGCAGAATGGTCCCGTTCTAATTTAGACACAGAAGTTACAACAGCAA  
AAGAAAGTCCTGAGATAGAACCACTTCCATTTACTCTGGCCCATGAGCGTTGTATCTCAGTAGTCCAGAA  
ACTTGTCTGTTTCTTCTCTCCATGGACTTTACATGTCATGCAGATCTCTTATTGTTTGTTTGTAAGGT  
CTTGACGCATTGCAAATGCCACGAGGCCAACTATTCATCTGTGTGAGATTGTGAACGAACCCCAGCTGG  
AAAGACTGCTGTTACTTTTGGTTGGAAGTCAATAGAGGAGATATATCTTGGGGTGGTGCTTGGGC  
TCAGTATTCCTTAACTTGCATGCTACAAGATATTTTAGCAGGAGAATTACTGGCTCCAGTAGCCGCAGAA  
GCCATGGAGGAAGGAACAGTGGGTGATGATGTAGGTGCGACAGCTGGTGACTCTGATGACTCCCTTCAAC  
AGTCCTCAGTTCAGTTGCTGGAACTATAGATGAACCTTTGACACATGACATAACAGGTGCACCTCCTCT  
GTCCTCTTTGGAAAAAGATAAAGAAATTGACCTTGAGTTACTTCAGGATCTAATGGAAGTTGACATTGAT  
CCTTTAGATATTGATTTGGAAAAGGACCCTCTTGCAGCCAAGGTTTTTAAGCCAATAAGCAGTACATGGT  
ATGATTATTGGGGTGCTGATTATGGGACCTACAATTACAACCCTTACATTGGAGGTCTGGGAATTCCTGT  
AGCAAAGCCACCAGCAAACACGGAGAAGAACGGATCACAGACAGTTAGCGTTTCAGTCTCTCAGGCCCTG  
GATGCTCGCCTAGAAGTTGGACTTGAACAGCAAGCAGAACTGATGTTGAAAATGATGTCTACTCTGGAGG  
CAGATTCCATTTTACAGGCATTAACAAATACATCTCCTACATTATCACAGTCTCCCACTGGAACAGATGA  
TTCATTCTAGGGGGTTTACAAGCAGCAAACCAAACCAGCCAGCTTATTATACAGTTATCATCTGTCCCA  
ATGTTAAATGTTTGTTTCAACAACTTTTTTCCATGCTTCAAGTCCATCATGTTTCAGTTGGAGTCACTTC

TCCAATTGTGGCTCACACTGAGCCTGAATTCTAGTTCAACTGGAAACAAAGAAAATGGAGCAGACATATT  
TTTATATAATGCTAATAGGATACCTGTTATTTTCATTAAATCAAGCATCAATAACTAGCTTTCTCACAGTG  
TTAGCTTGGTATCCCAATACTTTGCTCCGGACATGGTGCCTTGTGCTTCATAGCCTAACACTCATGACAA  
ACATGCAGCTTAATTCTGGTTCCAGCAGTGCCATTGGAAGCTCAGGAGAGTACTGCTCATTGTGGTTTC  
AGATCCAAACCTAATTCATGTATTAGTGAAATTTCTTTCTGGCACCAGTCCACATGGAACAAATCAACAC  
AGTCCACAGGTTGGTCCTACAGCTACACAAGCTATGCAAGAATTTCTTACTCGATTACAAGTGCATCTTT  
CTTCAACATGTCCTCAGATATTCAGTGAATTTTTGCTCAAGCTAATTCATATACTTTCAACTGAAAGGGG  
TGCTTTCCAGACAGGCCAAGGACCTCTCGATGCCCAAGTGAAGCTCTTAGAATTCCTCTGGAGCAGAAT  
TTTGAAGTCGTTTCAGTTAGTACTATTTCTGCCGTGATAGAATCGGTTACATTTTTAGTGCACCACTATA  
TCACTTGCTCAGACAAAAGTAATGTCAAGAAGTGGATCAGATAGCTCCGTGGGTGCTCGAGCATGCTTTGG  
GGGACTCTTTGCCAATCTTATTCGTCCGGGTGATGCAAAAGCAGTTTGTGGCGAAATGACAAGAGATCAA  
CTCATGTTTGATTTGTTAAACTTGTTAACATTTTAGTGCAGCTGCCTCTTTCAGGCAATAGGGAATACA  
GTGCAAGAGTGTCTGTGACCACAAATACAACAGATAGTGTTCAGATGAAGAAAAAGTCTCAGGAGGCCAA  
AGATGGCAATGGAAGCAGTACCAAGTGTTCAGGATCGCCTGCATATGTTGCTGACTTAGTCTTAGCCAAC  
CAACAAATTATGAGCCAGATTTTGTCTGCTCTGGGCCTGTGTAATAGCAGTGCCATGGCAATGATAATTG  
GAGCAAGTGGATTACATCTCACTAAACATGAAAACCTTCATGGTGGGTTGGATGCCATATCAGTTGGGGA  
TGGATTATTTACCATACTGACAACCCTTAGTAAAAAAGCTTCTACAGTCCACATGATGCTGCAGCCAATT  
TTAACATACATGGCCTGTGGATATATGGGCAGACAAGGCTCTCTTGCTACTTGCCAGTTATCTGAGCCAT  
TATTGTGGTTCATTTTGAGAGTATTGGATACTAGTGATGCCTTGAAAGCATTTTCATGATATGGGTGGTGT  
TCAGCTCATATGCAATAATATGGTTACTAGTACAAGGGCTATTGTGAACACTGCAAGAAGTATGGTATCA  
ACTATTATGAAATTTCTTGACTCTGGTCCAAATAAAGCTGTTGACAGCACATTGAAAACAAGAATACTAG  
CTTCTGAGCCTGACAATGCTGAAGGGATTTCATAACTTTGCACCCCTCGGTACAATCACATCTAGCAGTCC  
TACTGCCCAACCAGCTGAAGTGCTATTGCAGGCCACACCTCCTCACAGAAGAGCTCGCTCTGCTGCTTGG  
TCCTACATCTTTCTCCAGAGGAGGCTTGGTGTGACCTTACCATTACCTTCCTGCAGCAGTGCTGCTTA  
AGGAGATACATATCCAGCCTCATCTTGCATCTCTTGCAACCTGCCCTTCCTCAGTGTCTGTTGAAGTAAG

TGCAGATGGGGTAAATATGCTACCTTTGTCCACTCCTGTTGTCACAAGTGGCCTCACCTACATAAAAATT  
CAGCTTGTAAGCCGAAGTAGCTTCTGCTGTCTGCCTTAGACTACATCGTCCACGGGATGCCAGCACAT  
TAGGCCTTTCACAAATTAAATTATTGGGGCTCACTGCTTTTGGTACCACCTCTTCTGCAACAGTTAATAA  
TCCATTCTTCCATCTGAAGATCAGGTATCCAAAACAAGTATTGGATGGTTACGGTTATTACATCATTGC  
CTTACTCACATAAGTGATCTAGAAGGAATGATGGCAAGTGCAGCTGCACCTACTGCTAATCTGCTGCAGA  
CTTGTGCGGCCTTATTGATGTCACCTTACTGTGGAATGCATTACCCAACATCGAGGTTGTGCTTGTAAG  
GATAGGACTGCAGTCTACTAGAATTGGCCTGAAGCTCATAGACATTCTCCTGAGAAATTGTGCAGCATCA  
GGCAGTGATCCTACAGATTTGAATAGTCCTTTACTTTTTGGAAGACTAAATGGACTCTCTTCTGACTCTA  
CGATAGATATTCTTTACCAGCTTGGAACAACTCAGGATCCTGGTACAAAAGACAGAATTCAGGCCTTGTT  
AAAATGGGTAGTGATTCTGCAAGAGTGGCTGCTATGAAGAGAAGTGGCAGGATGAACTACATGTGTCCT  
AACTCCTCAACAGTAGAGTATGGTCTTCTGATGCCATCTCCTTCTCATTGCACTGTGTAGCAGCCATTC  
TGTGGCATAGTTATGAGCTGCTGTAGAATATGACTTACCAGCACTCCTGGACCAAGAGCTCTTTGAGTT  
ACTTTTAATTGGTCCATGTCTCTCCCTGCAATATGGTTTTGAAGAAAGCTGTTGACAGTCTACTTTCG  
TCAATGTGTCACGTACCCCAAATTTTTCTTTGCTCATGGGCTGGATGGGAATTACCCCTCCTCCAG  
TGCAATGTCATCATAGACTGTCCATGACAGATGATAGCAAAAAGCAGGATCTTAGTTCATCTTTAACAGA  
TGACTCTAAAAATGCACAAGCACCTCTCGCATTAAGTGAATCACATTTGGCTACCCTTGCTTCCTCTTCT  
CAATCTCCTGAAGCTATTAAACAATTACTAGACTCAGGTTTGCCTTCTCTTCTTGAGGAGTCTGGCTA  
GTTTCTGCTTTAGCCACATTTCTAGCTCAGAAAGCATTGCCAGTCAATAGATATTTCCAGGACAACT  
CAGGCGCCATCATGTCCACAACAATGTAATAAGATGCCTATCACAGCCGACCTAGTTGCTCCTATTCTT  
AGGTTTTTGACAGAAGTTGGCAATAGCCATATTATGAAAGATTGGCTTGGTGGTTCTGAAGTCAATCCAC  
TATGGACAGCACTTCTGTTTTATTGTGTCACTCTGGGTCCACTTCTGGAAGCCATAATTTAGGTGCACA  
ACAGACCAGTGCAAGATCAGCTTCTCTTCTCAGCTGCTACAACAGGACTGACTACTCAACAGCGCACA  
GCAATTGAGAATGCAACTGTTGCGTTCTTTCTACAGTGCATTTTCATGCCATCCTAATAATCAAAAGCTGA  
TGGCACAGGTTCTTTGTGAAGTATTTTACAGATCTCCTCAAAGAGGGAACCTTCCAACATCTGGGAACAT  
TTCAGGGTTTATACGAAGATTATTTTACAGTTGATGCTGGAAGATGAGAAAGTGACAATGTTTCTTCAG

TCTCCATGTCCACTGTACAAAGGTAGAATTAATGCTACTAGCCACGTCATCCAGCATCCAATGTATGGAG  
CAGGCCACAAATTCCGTACTCTTCATTTGCCAGTCTCAACAACATTATCAGATGTTCTTGACAGAGTGTC  
AGATACTCCAAGTATCACAGCTAAATTAATTAGTGAACAAAAAGATGACAAAGAAAAGAAAAACCATGAA  
GAGAAAGAAAAAGTTAAAGCGGAAAATGGATTTCAAGACAATTACAGTGTTGTTGTTGCCTCTGGGCTGA  
AGTCTCAATCTAAACGTGCTGTGTGCAGCTACACCACCTCGCCCACCATCCAGGAGGGGGAGGACAATACC  
TGATAAAATAGGAAGTACTTCAGGAGCAGAGGCTGCCAACAAAATAATTACTGTCCCAGTGTTTCACCTG  
TTTCACAAACTCTTGGCAGGCCAGCCATTGCCAGCTGAAATGACACTTGCCCAGCTTTTAACTCTCCTAT  
ATGACCGAAAACCTCCTCAGGGTTACCGCTCAATAGATCTGACTGTTAAATTGGGATCAAGAGTTATAAC  
AGACCCAGTCTATCAAAAACAGATTCTTATAAAAGACTACACCCTGAAAAAGATCATGGAGACTTACTT  
GCTAGCTGTCCAGAAGATGAGGCTCTCACTCCAGGTGATGAATGCATGGATGGGATACTGGATGAATCTT  
TGCTTGAAACCTGTCCAATTCAGTCACCATTACAAGTTTTTGCAGGAATGGGTGGACTGGCTCTTATTGC  
TGAAAGACTACCCATGCTATATCCAGAAGTAATTCAACAGGTGAGTGCTCCAGTTGTAACATCTACCACT  
CAGGAAAAGCCGAAGGATAGCGATCAGTTTGAATGGGTGACCATTGAACAGTCAGGGGAGTTAGTTTATG  
AAGCACCAGAACTGTTGCGGCTGAACCTCCACCTATCAAGTCAGCAGTACAGACCATGTCTCCCATACC  
TGCCCATCTTTGGCTGCTTTTGGATTATTTCTTCGCTTCCGGGCTATGCGGAAGTGCTACTGAAAGAG  
AGAAAACATGCCAGTGCCTTCTTCGATTGGTATTGGGAGTGACAGATGATGGAGAAGGAAGTCATATTC  
TTCAATCTCCATCAGCCAATGTGCTTCCAACCTTCCTTTCCACGTCCTTCGTAGCTTGTTTAGCACTAC  
ACCTTTGACAACTGATGATGGTGTACTTCTAAGGCGGATGGCATTGGAAATTGGAGCCTTACACCTCATT  
CTTGTCTGTCTCTCTGCTTTGAGCCACCATTCCCCACGAGTTCCAAACTCTAGCGTGAATCAAACCTGAGC  
CACAGGTGTCAAGCTCTCATAACCCTACATCAACAGAAGAACAACAGTTATATTGGGCCAAAGGGACTGG  
CTTTGGAACAGGCTCTACAGCTTCTGGGTGGGATGTGGAACAAGCCTTAACCTAAGCAAAGGCTGGAAGAG  
GAACATGTTACCTGCCTTCTGCAGGTTCTTGCCAGTTACATAAATCCCGTCAGTAGTGCGGTAAATGGAG  
AAGCTCAGTCATCTCATGAGACTAGAGGGCAGAACAGTAATGCCCTTCCTTCTGTACTTCTCGAGCTTCT  
CAGTCAGTCCTGCCTCATCCCAGCCATGTCATCTTATCTACGAAATGATTCAGTTCTGGACATGGCAAGA  
CATGTGCCACTCTATCGGGCACTGCTGGAATTGCTTCGGGCCATTGCTTCTTGCTGCCATGGTGCCCC

TATTGTTGCCCTTTCTACAGAGAACGGTGAAGAGGAAGAAGAACAGTCAGAATGTCAAACCTTCTGTTGG  
TACATTGTTAGCCAAAATGAAGACCTGTGTTGATACCTATACCAACCGTTTAAGATCTAAAAGGGAAAAT  
GTAAAACAGGAGTAAACCAGATGCGTCTGATCAAGAACCAGAAGGACTTACTCTTTTGGTACCAGACA  
TCCAAAAGACTGCTGAGATAGTTTATGCAGCCACCACCAGTTTGCGGCAAGCAAATCAGGAAAAAAAAACT  
GGGTGAATACTCCAAGAAGGCGGCTATGAAACCCAAACCTTTGTCAGTATTAAAGTCACTTGAAGAAAAA  
TATGTGGCTGTTATGAAGAAATTACAGTTTGATACGTTTGAAATGGTTTCTGAAGATGAAGATGGGAAAT  
TGGGATTAAAGTAAATTACCACTACATGTCTCAGGTGAAAAATGCTAATGATGCGAACAGTGCTGCCAG  
AGCTCGCCGCCTTGCCAGGAAGCTGTGACGCTTTCAACCTCACTGCCTCTGTCTTCATCCTCTAGTGTG  
TTTGTACGCTGTGATGAGGAGCGACTTGATATCATGAAGGTTCTAATAACTGGTCCAGCGGACACCCCTT  
ATGCAAATGGCTGCTTTGAGTTTGATGTGTATTTTCTCAAGATTATCCAGTTCACCCCTCTTGTGAA  
TCTAGAGACAACTGGTGGTCATAGCGTGCGATTCAATCCAAACCTTTATAATGATGGCAAGGTTTGTTA  
AGCATCTTAAACACGTGGCATGGAAGACCAGAAGAGAAGTGGAATCCTCAGACCTCAAGCTTTTTGCAAG  
TGTTGGTGTCTGTCCAGTCCCTTATATTAGTAGCTGAGCCTTATTTAATGAACCGGGATATGAACGGTC  
TAGAGGCACTCCCAGTGGCACACAGAGTTCTCGAGAATATGATGGAAACATTCGACAAGCAACAGTTAAG  
TGGGCAATGCTAGAACAAATCAGAAACCTTCACCATGTTTTAAAGAGGTAATACACAAACATTTTTACT  
TGAAAAGAGTTGAGATAATGGCCCAATGTGAGGAGTGGATTGCGGATATCCAGCAGTACAGCAGTGATAA  
GCGGGTAGGCAGGACTATGTCTCACCATGCAGCAGCTCTCAAGCGTCACACTGCTCAGCTCCGCGAAGAG  
TTGCTGAAACTCCCTGCCCTGAAGGCTTGATCCTGACACTGACGATGCCCCAGAGGTGTGCAGAGCCA  
CAACAGGTGCTGAGGAGACTCTAATGCATGATCAGGTAAACCCAGCAGCAGCAAAGAACTCCCCAGTGA  
CTCCAGTTATGAGCTGCATTGATGTGGACTTCATAGACACAAAGGCTTCGAAGCACAAGCCAAATATGT  
CAATATTTGTATGTAAGAACTAATTATGTAATAGGTAATGAAACTGAACTATACTATGCCCTTAAGGA  
GATCCAGTTTAATTCAAGGTGATCTTTTATTTACCTGTACAGGAGTGTAACCTTTTTTGTGCTTTTATTT  
TTCAATTGTGAGAACCACTGATTGGTATGTTCAACAAATTTGTGTATACAAAGAAATGGATAAATCACTG  
CTATATAAGGGAAACTACCTTAGGAAAGAATGTTTACTGAATGTTTATTTTATTTTATTTTTTTTTTACT  
ATAGAGTGAGGGGTTGTTAACAAGAATATATATTGGTCATTCTTACAACACTACTATTTAAAGTCAGCAAC

TTTTCAC TGAATTTGATAGATTTTATGTTTGGCCATATCTTCATGCTCACATTTGATTTCTGAAGACCTC  
CTACATACACTTCAATAAAAGTTAAATGGACATACTCCCTCTTTTTTGATTTACTGGTACATTTTAAAA  
TAATAAATCTGCCATAAAATGCATTATATCTGGAGACTTGCACTTGTATGGATGAATTTATTACATTCAA  
CATATTTAATTTTATGCCTTCTAATTCTAAGATGCAGAAAAAATAAATGAACATGATTTTATTCTATGC  
CAACATTTGGGCCTCTGAATGTATCTGTTATTTGAATTTAAGTATTTGAAAAGGAATGGTCAATTTGAAA  
GTCATTCTAAACTGATTTTTTTTTTCTAAAGGGCTCCTTTTTTCCTGGACTATGTGGTTTTATGACTAAA  
GTCACATGTATGTATTAAACATTGAGGCTCTGTAGAGGAGAGAGGATGTACCTCTCTGGTGCTGTTACAG  
TACATTCTGTACCTGCCATACAGGCTCATTTTCATGCAAATTCCTCCTAGAGCCAAATAAATAAAGACTT  
AGGTGAA

>NM\_013979.3 Homo sapiens BCL2 interacting protein 1 (BNIP1), transcript variant BNIP1-b, mRNA

GCCGGCGTCCCCAACATGGCGGCTCCCCAAGACGTCCACGTCCGGATCTGTAACCAAGAGATTGTCAAAT  
TTGACCTGGAGGTGAAGGCGCTTATTCAGGATATCCGTGATTGTTTCAAGGACCTTAAGTGCTCTTACTGA  
ACTGAATACTAAAGTAAAAGAGAAATTTCAACAGTTGCGTCACAGAATACAGCCAGTTCTCTATCAAAGG  
GCATTTATTTGGACTGCTTCCACATTTTTTTTTTAAGCTAACTTATCCCTGACAGACTTTTCTTCAACTC  
AGCATGACTTCAACTCTCCAACCTACACCTGTTACCTTCAGTGACCTGGAGCAGTTGGCTAAAGAGCAAGA  
CAAAGAATCAGAGAAACAACCTTCTACTCCAGGAAGTGGAGAATCACAAAAAGCAGATGCTCAGCAATCAG  
GCCTCATGGAGGAAAGCTAATCTCACCTGCAAAATTGCAATCGACAATCTAGAGAAAGCAGAACTTCTTC  
AGGGAGGAGATCTCTTAAGGCAAAGGAAAACCAAAAGAGAGCCTGGCCCAGACATCCAGTACCATCAC  
TGAGAGCCTCATGGGGATCAGCAGGATGATGGCCCAGCAGGTCCAGCAGAGCGAGGAGGCCATGCAGTCT  
CTAGTCACTTCTTCACGAACGATCCTGGATGCAAAATGAAGAATTTAAGTCCATGTCGGGCACCATCCAGC  
TGGGCCGGAAGCTTATCACAAAATACAATCGCCGGGAGCTGACGGACAAGCTTCTCATCTTCCTTGCGCT  
AGCCCTGTTTCTTGCTACGGTCTCTATATTGTGAAAAAGCGGCTCTTCCATTTTTGTGAGATCCCAAA

GGTGCCAGTTCTGGCCCTTCAGCTCCTGTTTCAGGATCTGTCCTGGTTCCTGAGCTCTAGGCTGCTAAG  
CTGAGCCACACACCCCTCCGTTTGACCCAGTTGCCTGCAGGTTGGATGGAACACAGTGCCCCACTTTTCT  
GCAAGTAGCTGGCTTGTAAGGGTGAACAGAGCCATGGGAGGAAGGTCTGGCATTGGGATGCCGCCCTGG  
GGACATACGAACCGCTCCTTCCACCATTGTGCACTATGGGAGGCCGCTGCTGCGTGGAGCACTTAAAGT  
CCAGCTCCAGGACCGGATGCCCCCTCTGTCTCCCGCTCCCATCGTGCCCTTAAATGCCAGATCTGGTGG  
AGGGAAGAGAGAAGAGGTAGGAAGAAAGGTGATGAAAACCTCTGGTCATTCTTGAATAAACTTGATTTT  
ATTTAATAGAATAAAATGTATTTGATTTTGTAAGATA

>NM\_004052.4 Homo sapiens BCL2 interacting protein 3 (BNIP3), mRNA

AGTCCGGGAGCGCAGCTGGGCCGCGCGCTCCGACCTCCGCTTCCACCGCCCGCAGCTGAAGCACATC  
CCGCAGCCCGGCGCGGACTCCGATCGCCGAGTTGCCCTCTGGCGCCATGTGCGAGAACGGAGCGCCCGG  
GATGCAGGAGGAGAGCCTGCAGGGCTCCTGGGTAGAACTGCACTTCAGCAATAATGGGAACGGGGGCAGC  
GTTCCAGCCTCGGTTTCTATTTATAATGGAGACATGGAAAAAATACTGCTGGACGCACAGCATGAGTCTG  
GACGGAGTAGCTCCAAGAGCTCTCACTGTGACAGCCACCTCGCTCGCAGACACCACAAGATACCAACAG  
AGCTTCTGAAACAGATACCCATAGCATTGGAGAGAAAAACAGCTCACAGTCTGAGGAAGATGATATTGAA  
AGAAGGAAAGAAGTTGAAAGCATCTTGAAGAAAAACTCAGATTGGATATGGGATTGGTCAAGTCGGCCGG  
AAAATATTCCCCCAAGGAGTTCCTCTTTAAACACCCGAAGCGCACGGCCACCCTCAGCATGAGGAACAC  
GAGCGTCATGAAGAAAGGGGGCATATTCTCTGCAGAATTTCTGAAAGTTTTCTTCCATCTCTGCTGCTC  
TCTCATTTGCTGGCCATCGGATTGGGGATCTATATTGGAAGGCGTCTGACAACCTCCACCAGCACCTTTT  
GATGAAGAACTGGAGTCTGACTTGGTTCGTTAGTGGATTACTTCTGAGCTTGCAACATAGCTCACTGAAG  
AGCTGTTAGATCCTGGGGTGGCCACGTCACTTGTGTTTATTTGTTCTGTAAATGCTGCGTTCCTAATTTA  
GTAAAATAAAAGAATAGACACTAAAATCATGTTGATCTATAATTACACCTATGGGATCAATAAGCATGTC  
AGACTGATTAATGTCTACTGTGAAAATTTGGTAGTAAATTTTCATTTGATATTAGATATAAATATCTGAA  
TATAAATAATTTTAATACTAGTCATGATGTGTGTTGATTTTAAAAATTATCTGCAACCTTAATTGAG

CTGAAGTACTTTATATTTCAAAGAATGAATAACATTGATAATAAAATCGCTACTTTAAGGGGTTTGTCC  
AAAATAAATATTGTGGCCTTATATATCACACTATTGTAGAAAGTATTATTTAATTTAAATGGATGCAGGT  
TGTCTACTAAAGAAAGATTATATATAACTATGCTAATTGTTCAATCAACAGAAACCAAGATAGAGCTA  
CAAACCTCAGCTGTACAGTTCGTACACTAACTCTTCTTGCTTTTGCATTATAAGGAATTAAGTCTCCGAT  
TATTAGGTGATCACCTGGATGATCAGTTTTCTGCTGAAGGCACCTACTCAGTATCTTTTCCTCTTTATC  
ACTCTGCATTGGTGAATTTAATCCTCTCCTTTGTGTTCAACTTTTGTGTGCTTTTAAAATCAGCTTTATT  
CTAAGCAAATCTGTGTCTACTTTAAAAAACTGGAAATGGAAAAAAAATAAATCTTTGCCAAATCCTTCA  
GA

>NM\_004331.3 Homo sapiens BCL2 interacting protein 3 like (BNIP3L), transcript variant 1, mRNA  
GGACTCGGCTTGTTGTGTTGCTGCCTGAGTGCCGGAGACGGTCCTGCTGCTGCCGCAGTCCTGCCAGCTG  
TCCGACAATGTCGTCCACCTAGTCGAGCCGCCGCCGCCCTGCACAACAACAACAACACTGCGAGGAA  
AATGAGCAGTCTCTGCCCCGCCGGCCGGCCTCAACAGTTCCTGGGTGGAGCTACCCATGAACAGCAGCA  
ATGGCAATGATAATGGCAATGGGAAAAATGGGGGGCTGGAACACGTACCATCCTCATCCTCCATCCACAA  
TGGAGACATGGAGAAGATTCTTTTGATGCACAACATGAATCAGGACAGAGTAGTTCCAGAGGCAGTTCT  
CACTGTGACAGCCCTTCGCCACAAGAAGATGGGCAGATCATGTTTGATGTGGAAATGCACACCAGCAGGG  
ACCATAGCTCTCAGTCAGAAGAAGAAGTTGTAGAAGGAGAGAAGGAAGTCGAGGCTTTGAAGAAAAGTGC  
GGACTGGGTATCAGACTGGTCCAGTAGACCCGAAAACATTCCACCCAAGGAGTTCCACTTCAGACACCTT  
AAACGTTCTGTGTCTTTAAGCATGAGGAAAAGTGGAGCCATGAAGAAAGGGGTATTTTCTCCGCAGAAT  
TTCTGAAGGTGTTTCATTCCATCTCTCTCCTTTCTCATGTTTGGCTTTGGGGCTAGGCATCTATATTGG  
AAAGCGACTGAGCACACCCTCTGCCAGCACCTACTGAGGGAAAGGAAAAGCCCCTGGAAATGCGTGTGAC  
CTGTGAAGTGGTGTATTGTCACAGTAGCTTATTTGAACTTGAGACCATTGTAAGCATGACCCAACCTACC  
ACCCTGTTTTTACATATCCAATTCCAGTAACTCTCAAATTCATATTTATTCAAACCTCTGTTGAGGCAT

TTTACTAACCTTATACCCTTTTTGGCCTGAAGACATTTTAGAATTTCTAACAGAGTTTACTGTTGTTTA  
GAAATTTGCAAGGGCTTCTTTCCGCAAATGCCACCAGCAGATTATAATTTGTCAGCAATGCTATTATC  
TCTAATTAGTGCCACCAGACTAGACCTGTATCATTGATGTTATAAATTTTACTCTTGCAACATAACTACC  
ATCTCTCTCTTAAACGAGATCAGGTTAGCAAATGATGTAAAAGAAGCTTTATTGTCTAGTTGTTTTTTT  
TCCCCAAGACAAAGGCAAGTTTCCCTAAGTTTGAGTTGATAGTTATTAAGAAAGAAAACAAAACAAAAA  
AAAAGGCAAGGCACAACAAAAAATATCCTGGGCAATAAAAAAATATTTTAAACCAGCTTTGGAGCCAC  
TTTTTTGTCTAAGCCTCCTAATAGCGTCTTTTAATTTATAGGAGGCCAACTGTATAAATGATAGGTATGA  
AATAGAATAAGAAGTAAAATACATCAGCAGATTTTCATACTAGTATGTTGTAATGCTGTCTTTTCTATGG  
TGTAAGATCTTTCTTTCTGATAAGGAACGTCTCAGGCTTAGAAATATATGAAATTGCTTTTGTAGATTTT  
TGCGTGTGTGTTTGATATTTTTTACGATAATTAGCTGCATGTGAATTTTTCATGACCTTCTTTACATTTT  
TTATTTTTTATTTCTTTATTTTTTTTTCTCTAAGAAGAGGCTTTGGAATGAGTTCCAATTTGTGATGTTA  
ATACAGGCTTCTGTTTTAGGAAGCATCACCTATACTCTGAAGCCTTTAACTCTGAAGAGAATTGTTTC  
AGAGTTATTCCAAGCACTTGTGCAACTTGGAAAAACAGACTTGGGTTGTGGGAACAGTTGACAGCGTTCT  
GAAAAGATGCCATTTGTTTCCTTCTGATCTCTCACTGAATAATGTTTACTGTACAGTCTTCCAAGGTGA  
TTCCTGCGACTGCAGGCACTGGTCATTTTCTCATGTAGCTGTCTTTTCAGTTATGGTAAACTCTTAAAGT  
TCAGAACTCAACAGATTCCTTCAGTGATATACTTGTTGTTTCAATTTCTAAAATGTGAAGCTTTAGGAC  
CAAATTGTTAGAAAGCATCAGGATGACCAGTTATCTCGAGTAGATTTTCTTGGATTTCAGAACATCTAGC  
ATGACTCTGAAGGATACCACATGTTTTATATATAAATAATTACTGTTTATGATATAGACATTGATATTGA  
CTATTTAGAGAACCGTTGTTAATTTTAAACTAGCAATCTATAAAGTGCACCAGGTCAACTTGAATAAAA  
ACACTATGACAGACAGGTTTGCCAGTTTGCAGAACTAACTCTTTTCTCACATCAACATTTGTAAAATTG  
ATGTGTTATAGTGGAAAATAACATATAGATTAAACAAAATTTTATCTTTTTTCAAGAATATAGCTGGCT  
ATCTTTAAGAAAGATGATATATCCTAGTTTTGAAAGTAATTTTCTTTTTTCTTTCTAGCATTTGATGTCT  
AAATAATTTTGGACATCTTTTCTAGACCATGTTTCTGTCTTACTCTTAAACCTGGTAACACTTGATTT  
GCCTTCTATAACCTATTTATTTCAAGTGTTTATTTGAATTTCTTTGGGAAGAAAGTAAATCTGATGGC  
TCACTGATTTTTGAAAAGCCTGAATAAAATTGGAAAGACTGGAAAGTTAGGAGAACTGACTAGCTAAACT

GCTACAGTATGCAATTTCTATTACAATTGGTATTACAGGGGGGAAAAGTAAAATTACACTTTACCTGAAA  
GTGACTTCTTACAGCTAGTGCATTGTGCTCTTTCCAAGTTCAGCAGCAGTTCTATCAGTGGTGCCACTGA  
AACTGGGTATATTTATGATTTCTTTAGCGTTAAAAAGAAACATAGTGTTGCCCTTTTCTTAAAGCATC  
AGTGAAATTATGGAAAATTACTTAAAACGTGAATACATCATCACAGTAGAATTTATTATGAGAGCATGTA  
GTATGTATCTGTAGCCCTAACACATGGGATGAACGTTTTACTGCTACACCCAGATTTGTGTTGAACGAAA  
ACATTGTGGTTTGGAAAGGAGAATTCAACAATTAATAGTTGAAATTGTGAGGTTAATGTTTAAAAAGCTT  
TACACCTGTTTACAATTTGGGGACAAAAAGGCAGGCTTCATTTTTCATATGTTTGATGAAAACCTGGCTCA  
AGATGTTTGTAAATAGAATCAAGAGCAAACTGCACAACTTGCACATTGGAAAGTGCAACAAGTTCCCG  
TGATTGCAGTAAAAATATTTACTATTCTAAAAAATGAGAATTGAAGACTTAGCCAGTCAGATAAGTTTT  
TTCATGAACCCGTTGTGGAAATTATTGGAATTAAGTGAAGCTTAGCCAGTCAGATAAGTTTT  
AGTTAGCACTTTGTATCGTTATATACAGTTTACAATACATGTATAACTGTAGCTATAAACATTTTGTGC  
CATTAAAGCTCTCACAAAACCTT

>NM\_005831.5 Homo sapiens calcium binding and coiled-coil domain 2 (CALCOCO2), transcript variant 3, mRNA

ACTCTGCCCTGTTGCTGTCGCGCCGCTGCTGGTTGCTGTCCCTGGACCCCTACCATGGAGGAGACCATCA  
AAGATCCCCCACATCAGCTGTCTTGCTGGATCACTGTCATTTCTCTCAGGTCATCTTTAACAGTGTGGA  
GAAGTTCTACATCCCTGGAGGGGACGTACATGTCATTATACCTTCACCCAGCATTTTCATCCCTCGTCGA  
AAGGATTGGATTGGCATCTTTAGAGTGGGGTGGAAGACAACCCGTGAGTATTACACCTTCATGTGGGTTA  
CTTTGCCCATTTGACCTAAACAACAAATCAGCTAAACAGCAGGAAGTCCAATTCAAAGCTTACTACCTGCC  
CAAGGATGATGAGTATTACAGTTCTGCTATGTGGATGAGGATGGTGTGGTCCGGGGAGCAAGTATTCCT  
TTCCAATTCGGTCCAGAAAATGAGGAAGACATCCTGGTTGTTACCACTCAGGGAGAGGTGGAAGAGATTG  
AGCAGCACAAACAAGGAGCTTTGCAAAGAAAACCAGGAGCTGAAGGACAGCTGTATCAGCCTCCAGAAGCA

GAAGTCAGACATGCAGGCTGAGCTCCAAAAGAAGCAGGAGGAGCTAGAAACCTACAGAGCATCAATAAG  
AAGTTGGAAGTCAAAGTGAAAGAACAGAGGACTATTGGGAGACAGAGCTGCTTCAACTGAAAGAACAAA  
ACCAGAAGATGTCCTCAGAAAATGAGAAGATGGGAATCAGAGTGGATCAGCTTCAGGCCAGCTGTCAAC  
TCAAGAGAAAGAAATGGAGAAGCTTGTTTCAGGGAGATCAAGATAAGACAGAGCAGTTAGAGCAGCTGAAA  
AAGGAAAATGACCACCTCTTTCTCAGTTTAACTGAACAGAGGAAGGACCAGAAGAAGCTCGAGCAGACAG  
TGGAGCAAATGAAGCAGAATGAACTACTGCAATGAAGAAACAACAGGAATTAATGGATGAAAACCTTTGA  
CCTGTCAAAAAGACTGAGTGAGAACGAAATTATATGTAATGCTCTGCAGAGACAGAAAGAGAGATTGGAA  
GGAGAAAATGATCTTTTGAAGAGGGGAGAACAGCAGATTGCTCAGTTACATGGGTCTGGATTTTAATTCTT  
TGCCGTATCAAGTACCTACTTCAGATGAAGGAGGCGCAAGACAAAATCCAGGACTTGCCTATGGAAACCC  
ATATTCTGGTATCCAAGAAAGTTCTTCCCCAGCCCGCTCTCCATCAAGAAATGCCCTATCTGCAAAGCA  
GATGATATTTGTGATCACACCTTGGAGCAACAGCAGATGCAGCCCCTTTGTTTCAATTGTCCAATTTGTG  
ACAAGATCTTCCCAGCTACAGAGAAGCAGATCTTTGAAGACCACGTGTTCTGCCACTCTCTCTGAGTATC  
CCAACCTCTTGGATGTATACAGAGATTTTATAGAATAGAACCTATAGCTTCTACCATGAGTTATATGAGT  
CAAGATCCTGCCTAACCTGAAATTATTAGGGATTTACTCAGCCCTGCTGCCGCTAACAGTGGAGTTATGT  
CACTGATCTGAAGGTCACTGTTAAGGGCTTCTGCTGCCATCCTTGTTGGGTTGCTACCTTTAAGTCGCATA  
ACTCTAGCTGTATCATCCTCTCACCTGTCACTTCTGAGGGTCTCAGTACAAGGGCCCTGGGATGGAGC  
CAACCTGGGTATTCACAACAGGCCTGACTTGATACTAAGTGATTAGTTTTCCAAGTTGTCCCACTGCCAT  
TCAAAGTCAGCCCTTGAGTGTATTTGTTCTCAGTCCTAACCTGGGGCCAGAGATTGGTCCGAGGTTGAG  
AATTCCTTCCTCCTCATCCTTGGTGTGCTTTCTCAAATGATTGTTTTAGACTAGCCAAAAATGCCGTG  
GCAAAGAGCTCAGAAATCCAATTTGGATACCAAAGGTTTCTCATGTAAATTTCTCAGCCCCCAAAGAAGC  
ATCTTACTCCTGAACCTTAGACAGGAAGTATTGTTTCAGTCACAGAAAGCTTTTCTGGGTACCTCTGGTT  
AGCACTTCTACTCTCTGATATTTCTATGTACATAGCTTTTATTGTTGTAAATCCTTTCTTAATGGTTA  
AATAGGATTGTTAGCAACTATGGGTTTGCAGTTTTCTGAGTAGGTGAGTTTTGAATATGGGTAAATCAGA  
ATAATGAGACAACCTGTAAATCTCTTAATACTAAAAATAAATTACTCTTCTATTTCAGGGACTTAGGTA  
ATTTAAATAAACCTTCAATTTATGGTCTTCTGTTTTGAAGCTCATGGGAAAATTGTGATCAAAAGGGCT

ATGGGAAGGGCAGACCCGCCAATGATTTCTCTTCACCTGTCTTAAGATTAAATAAAAAAGAGTGCCTG  
GCAGTTATCTTGAGGTGGGGAAGGAGGTGATGAAACATTAGTTTGTGAAATCCAAGGCCCTGGCTTGCTT  
TCTTTCTTTTTTTTTTTTTTTTTTTTTGAAACAGTCTCTCTGTCAACCAGGCTGGCGTGCAATGGCGCAG  
TTGACTCACTACAGCCTCTGCCTCCCAGGTTCAAGCGATTCTCATGCCTTAGCCTCCCAAGTAGCTGGGA  
TTACAGGTGTGTGCCGCAATGCCAGCTAATTTTTGTGTTTTTAGTAGAGACAGGGTTTCACTATGTTGG  
CCAGGCTGGTCTCGAACTCCTGGCCTCACGTGATCTGTCCACTTCAGCCGTCCAAAGTGCTGGGATTACA  
AGCGTGAGCCACTGTGCTGGGCCCCGAGGCCCTGACTTCTTGCTGTAACCTTCCATGCATTTTTTTAAAA  
GGAGCAGTGTGGATTTTCGCACCTTTGTGAACTAAGTTCAATGCGCTCTATCCAAATTTGCCTAATTGA  
ACTATAAGAAAGTAATAATTCCATTTTCTATCCCCTCAGGGACTGAACAAATGGAAATAACTCCCAGGCA  
GTATCAGGTGGTCACTACAGAGACTTCACAAAACTTTTGAATGATGTGAAACACGATGTCATGAATAA  
GGGTTGAGCCAACTATAGCTCTGTGTTCTACTGGGCTTCCCTAATGTGGTTGGGAGTTATGCCCTAGA  
CTAACTGTATTGTCCTAGTCACAGCTCCTTGCTTTGATTCATCCTTGATAAAATGAAGATGAACTTAC  
ACTACTTCTCCAAGCCTTTTGCTGTCTTAAGAATAAGACCTGAGATTAACACTAACCCTAGAATAGAAAT  
GTAATAGGGAGATGGTAATAAAGGAGTTTTTCTGGCACATACCCTCCCTACAGAATTTCTGTTGCTCCCC  
AGATCCAGTGAAGAATTGCAGTTTCATTTATTTGTACCAGTCAGCTCTTAATTAAGTACATGAATGGAG  
AGGAACAGTGGTGACATAATCCAAATCAGTGAATACCATTTTCTGGTGAATTACCCACCCCTTTGCCCC  
TGCTACCCCGAGGGTTACCATGATTGTCAACAGCAGCAGGAGCCCTTCCACAGGGCTTGGTAAAAAAACC  
AGTTGAGGTGTTAATGACCCTTTTGCTGGGTGTAAACAAAGCATCTTTAACCCTGTTTCATTATCCCC  
AGCTGCTCTTACCAAGGCTTTGAAGGGGGAAATTATGCTCTAGGCAGCCACTAGTAGTAAACAAT

>NM\_172226.3 Homo sapiens calcium/calmodulin dependent protein kinase kinase 2 (CAMKK2),  
transcript variant 7, mRNA

AGAGCAAGCTGAGCCGAGCCGAGCCGAGCTGGGGGCGCAGAGCGCGGAGGCGGCGGCGCGGAGGCC  
AGGTGGCTCCGCTGCCGGATGGGAGTGCCCCAGTGTGCTGGATGAAGCTGGCGCATGCACCATGTCATCA

TGTGTCTCTAGCCAGCCCAGCAGCAACCGGGCCGCCCCCAGGATGAGCTGGGGGGCAGGGGCAGCAGCA  
GCAGCGAAAGCCAGAAGCCCTGTGAGGCCCTGCGGGGCCTCTCATCCTTGAGCATCCACCTGGGCATGGA  
GTCCTTCATTGTGGTCACCGAGTGTGAGCCGGGCTGTGCTGTGGACCTCGGCTTGGCGCGGGACCGGCCC  
CTGGAGGCCGATGGCCAAGAGGTCCCCCTTGACACCTCCGGGTCCCAGGCCCGGCCCCACCTCTCCGGTC  
GCAAGCTGTCTCTGCAAGAGCGGTCCCAGGGTGGGCTGGCAGCCGGTGGCAGCCTGGACATGAACGGACG  
CTGCATCTGCCCCGTCCCTGCCCTACTACCCGTAGCTCCCCGAGTCCTCGCCTCGGCTGCCCCGGCGG  
CCGACAGTGGAGTCTCACCACGTCTCCATCACGGGTATGCAGGACTGTGTGCAGCTGAATCAGTATACCC  
TGAAGGATGAAATTGGAAGGGCTCCTATGGTGTGTCGAAGTTGGCCTACAATGAAAATGACAATACCTA  
CTATGCAATGAAGGTGCTGTCCAAAAGAAGCTGATCCGGCAGGCCGGCTTCCACGTGCGCCTCCACCC  
CGAGGCACCCGGCCAGCTCCTGGAGGCTGCATCCAGCCCAGGGGCCCCATTGAGCAGGTGTACCAGGAAA  
TTGCCATCCTCAAGAAGCTGGACCACCCAATGTGGTGAAGCTGGTGGAGGTCCTGGATGACCCCAATGA  
GGACCATCTGTACATGGTGTTTGAAGTGGTCAACCAAGGGCCCGTGATGGAAGTGCCACCCCTCAAACCA  
CTCTCTGAAGACCAGGCCCCGTTTCTACTTCCAGGATCTGATCAAAGGCATCGAGTACTTAACTACCAGA  
AGATCATCCACCGTGACATCAAACCTTCCAACCTCCTGGTCGGAGAAGATGGGCACATCAAGATCGCTGA  
CTTTGGTGTGAGCAATGAATTCAAGGGCAGTGACGCGCTCCTCTCCAACACCGTGGGCACGCCCCGCTTC  
ATGGCACCCGAGTCGCTCTCTGAGACCCGCAAGATCTTCTCTGGAAGGCCTTGGATGTTTGGGCCATGG  
GTGTGACACTATACTGCTTTGTCTTTGGCCAGTGCCCATTCATGGACGAGCGGATCATGTGTTTACACAG  
TAAGATCAAGAGTCAGGCCCTGGAATTTCCAGACCAGCCCGACATAGCTGAGGACTTGAAGGACCTGATC  
ACCCGTATGCTGGACAAGAACCCCGAGTCGAGGATCGTGGTGCCGGAATCAAGCTGCACCCCTGGGTCA  
CGAGGCATGGGGCGGAGCCGTTGCCGTGGAGGATGAGAACTGCACGCTGGTGAAGTGAAGAGGA  
GGTCGAGAACTCAGTCAAACACATTCCCAGCTTGGCAACCGTGATCCTGGTGAAGACCATGATACGTAAA  
CGCTCCTTTGGGAACCCATTCGAGGGCAGCCGGCGGGAGGAACGCTCACTGTCAGCGCTGGAAACTTGC  
TCACGAAGCAAGGCAGCGAAGACAACCTCCAGGGCACCGACCCGCCCCCGTGGGGGAGGAGGAAGTGCT  
CTTGTGAGAGGCAGTCCCTGCGTGAAAGTTGCTGGGCCCCCGCCCCGGCTCCCCCGCACGCATGCATC  
CACTGCGGCCGGAGGAGGCCATGGAGCCCAGTAGCTGCCTGGATCGCTCGACCTCGCATGCGCGCCGCG

TCGCCTCTGGGGGGCTGCTGCACCGCGTTTCCATAGCAGCATGTCCTACGGAAACCCAGCACGTGTGTAG  
AGCCTCGATCGTCATCTCTGGTTATTTGTTTTTCTTTGTTGTTTTAAAGGGGACAAAAAAAAAAAAAG  
GACTTGACTCCATGACGTCGACCGTGGCCGCTGGCTGGCTGGACAGGCGGGTGTGAGGAGTTGCAGACCC  
AAACCCACGTGCATTTTGGGACAATTGCTTTTTAAACGTTTTTATGCCAAAAATCCTTCATTGTGATTT  
TCAGAACCACGTGAGATATACCAAGTGAAGTGTGTGGGGTTTGACAAGTGTGGAAAGGCGAGCAGAAAA  
CTCCGGCGGTCTGAGGCCATGGAGGTGGTTGCTGCATTTGAGAGGGAGTAGGGGGCTAGATGTGGCTCCT  
AGTGCAAACCGGAAACCATGGCACCTTCAGAGCCGTGGTCTCAAGGAGTCAGAGCAGGGCTGGCCCTCA  
GTAGCTGCAGGGAGCTTTGATGCAACTTATTTGTAAGAAGGATTTTTAAATTTTTTATGGGTAGAATTGT  
AGTCAGGAAAACAGAAAGGGCTTGAAATTTAATAAGTGCTGCTGGAAGGGGATTTTCCAAGCCTGGAAGG  
GTATTCAGCAGCTGTGGTGGGGAAACATTTCTCCTGAAAGACTGAACGTGTTTCTTCATGACAGCTGCTC  
AAAGCAGGTTTCTGAGATAGCTGACCGAGCTCTGGTAAATCTCTTTGTCAAATTACGAAAACCTCAGGGT  
GAAATCCTATGCTTCCATGTACATTACATGGCTTAAGATTAAACAAAAACATTTTTCAAGTCTCTAACTA  
GAGTGAAGTCTAGAGCACAGTAGTTCAGAACTATTTAGAGCTTCCAGGATATATTTACAGCTTCAGGC  
ATGTGATCAGTTAGAGCCGATGAAACCTATGCCCGCCTGTATATATATTAGCAGCTTAGCTAGTTCATAA  
CCTGTATATTCTAAAGACTGCTAAGGTTTTGTTTTCATTTTAAATCCTAGCTGATTGTTGTGGTCAATGA  
AATACCCAGTTTCTGGAGGGCCAGGTGGGAAATGCTTTCACTGGACCAACACACAAATGATCATCCTGAG  
GATCTGAGCTTCCCTAGACTCCACACAATAACCTTGGGGCACCTTTTAGAGAAGACTGTTGAAACCCAC  
AGCACTCGTTGGGGTATGAGGAAACCAGGGCTTGGCACAGGAAGTTCCCCTTGTAGCTAAAAGTCCAGA  
AAGAAAGGGTTCATCTTTTTGACTTCCAAGTATGTTGGGAAGTTTGGTTGAGGTTCAAGTGTGACTCCT  
TCCAGAGCCACAGGTAGGGGAGTGTGAAGTTGAGGGGGAGGAAAGCTGGAAGGACTCTGCCTTGGGAGAT  
TCCCAGCTCTGCTTTCAGCGCTTGGTGAATCTGGGCTGGGGAAAGACGGCACCGGGAACTCTGCTTC  
CCCATTGTTTCCATCTGATCAGCTGTGGTGTGAGGACTTCTCAGACAAAGGCAAGGCCTCGTGCCCTGC  
CCAGCCCATTCATGGAGCCCTGGGCCTTCTTGGCTTCCATAGATCCTAAGCTCTTGACTGTAGTTTAGCC  
AGACTTGTTTTGCTATCTTATAAGCAGTTCAGAATTAGGGAATGCTGGTTTTGAAGAGCAAAGGACAGGT  
AGTCTAGAGAGGGTCGCTCTGGCCTGCTTGTGGGTCTTTGTAACCCAGCACTTCCTCTTGCCCTCCTGGC

TTTATGTTTATGGGGAGAGGACTCAATAGCTCCACCCCTTCTGGCACCAGATGGGGCTTGGTTAGTTTGC  
AATAAGCACCTTGCAGAGGTTAAAGCCAGCGGGTCCCTAGTCTTAGGCCAGCCTGCTTGTGTGGGCTCT  
GGCCTGGCCTGGTGGCTGGCCCAGGGGGCAGCAGTGCTTAGAGCTTCTGCAGGGCTTCTCTTGTTTACAC  
AGCTGCATCAGACAATGCCATTTCTCCCCACCACGGAACCTTCCATCTAAGATTTCTCCAGGGAATGCC  
AGCAATCAGGCAGCACCCAGCTGTGGGGGCAGTGGGGTGGGGGAGACCCACATTGATGACTTTTTTTTTT  
TCTTTTAATGAAGAAACACCAAAGAAAGCTGTGGAAGGACCTGCCCCACATGAAAAGGATAAGCCAAGA  
TGGCTGTAAACACAGAGCATTGAGCTGCCACTCTTGAGCACATTGATTTTTCAAAAGCCAGCTCTGTC  
AGGAAAGGAGGTGCTGTTATGAGCAGCTCTCCAGTGGGCAAAGAGGACGCCATAATTTCTTCCATTGC  
TAGCTCATCTGTGGGACCAATTTGGTGTAAAGCAACCTGTGGCCTGCACTTGTGGCCTCGAAGGAAGCACA  
AACCCTCCATCCACTTCCATTTCTCTGCCCTTTTCCACCTCCCCCTTCCATCCCACCAGCTGCCAGTG  
GCTCCCAGAAAGCCTTATTGAGCCCCCTTGTGACACTTGGGGCTGCGGAGGCCTCTCCCTACTGGTCTGG  
CCTTCCTGAGAGGCAGGTCTTCCGTCCTCAGAGCCTTTCTGGAACAAGGAGAATGCCTGTGCAGGTGGA  
CACACAGGCCTGGCCTGTCGCTCTCACTTGTCTTCCAGCGGGGAGCTTCACGTTGCCGAGTGGAAGAACC  
ATGACCTCCACTTGCTTCCAAGGTGCTAGGGAAGTTTCAGGGTACGCTGGTTCCCCTCTCCAGCTGGAGG  
CCGAGTTTCTGGGGACTGCAGATTTTTCTACTCTGTGATCGATTCAATGCCCGATGCTTCTGTTTCATTC  
CCGACCCTTTCTACTATGCATTTTCTTTTATCAGGTGTATAAAGTTAAATACTGTGTATTTATCACTAA  
AAAGTACATGAACTTAAGAGACAATAAGCCTTTCGTGTTTTTCCACAGGTGTTTAAGCTTCTCTGTACA  
GTTGAAATAAACAGACAGCAAAATGGTGCCAA

>NM\_001024649.2 Homo sapiens calnexin (CANX), transcript variant 2, mRNA

AGCGGTGGCCGAGGCCTCTTGGTTCTGCGGCACGTGACGGTCGGGCCGCCTCCGCCTCTCTTTACTGC  
GGCGCGGGGCAAGATCATGGAAGGGAAGTGGTTGCTGTGTATGTTACTGGTGCTTGGAAGTCTATTGTT

GAGGCTCATGATGGACATGATGATGATGTGATTGATATTGAGGATGACCTTGACGATGTCATTGAAGAGG  
TAGAAGACTCAAAACCAGATACCACTGCTCCTCCTTCATCTCCAAGGTTACTTACAAAGCTCCAGTTCC  
AACAGGGGAAGTATATTTTGCTGATTCTTTTGACAGAGGAAGTCTGTCAGGGTGGATTTTATCCAAAGCC  
AAGAAAGACGATACCGATGATGAAATTGCCAAATATGATGGAAAGTGGGAGGTAGAGGAAATGAAGGAGT  
CAAAGCTTCAGGTGATAAAGGACTTGTGTTGATGTCTCGGGCCAAGCATCATGCCATCTCTGCTAAACT  
GAACAAGCCCTTCCTGTTTGACACCAAGCCTCTCATTGTTGAGTATGAGGTTAATTTCCAAATGGAATA  
GAATGTGGTGGTGCCTATGTGAAACTGCTTTCTAAAACACCAGAACTCAACCTGGATCAGTTCCATGACA  
AGACCCCTTATACGATTATGTTTGGTCCAGATAAATGTGGAGAGGACTATAAACTGCACTTCATCTTCCG  
ACACAAAACCCCAAACGGGTATCTATGAAGAAAAACATGCTAAGAGGCCAGATGCAGATCTGAAGACC  
TATTTTACTGATAAGAAAACACATCTTTACACACTAATCTTGAATCCAGATAATAGTTTTGAAATACTGG  
TTGACCAATCTGTGGTGAATAGTGGAAATCTGCTCAATGACATGACTCCTCCTGTAAATCCTTCACGTGA  
AATTGAGGACCCAGAAGACCGGAAGCCCGAGGATTGGGATGAAAGACCAAAAATCCCAGATCCAGAAGCT  
GTCAAGCCAGATGACTGGGATGAAGATGCCCTGCTAAGATTCCAGATGAAGAGGCCACAAAACCCGAAG  
GCTGGTTAGATGATGAGCCTGAGTACGTACCTGATCCAGACGCAGAGAAACCTGAGGATTGGGATGAAGA  
CATGGATGGAGAATGGGAGGCTCCTCAGATTGCCAACCTAGATGTGAGTCAGCTCCTGGATGTGGTGTG  
TGGCAGCGACCTGTGATTGACAACCCCAATTATAAAGGCAAATGGAAGCCTCCTATGATTGACAATCCCA  
GTTACCAGGGAATCTGGAAACCCAGGAAAATACCAAATCCAGATTTCTTTGAAGATCTGGAACCTTTCAG  
AATGACTCCTTTTAGTGCTATTGGTTTGGAGCTGTGGTCCATGACCTCTGACATTTTTTTTGACAACCTT  
ATCATTTGTGCTGATCGAAGAATAGTTGATGATTGGGCCAATGATGGATGGGGCCTGAAGAAAGCTGCTG  
ATGGGGCTGCTGAGCCAGGCGTTGTGGGGCAGATGATCGAGGCAGCTGAAGAGCGCCCGTGGCTGTGGGT  
AGTCTATATTCTAACTGTAGCCCTTCCTGTGTTCTGTTATCCTCTTCTGCTGTTCTGGAAAGAAACAG  
ACCAGTGGTATGGAGTATAAGAAAACCTGATGCACCTCAACCGGATGTGAAGGAAGAGGAAGAAGAGAAGG  
AAGAGGAAAAGGACAAGGGAGATGAGGAGGAGGAAGGAGAAGAGAAACTTGAAGAGAAACAGAAAAGTGA  
TGCTGAAGAAGATGGTGGCACTGTCAGTCAAGAGGAGGAAGACAGAAAACCTAAAGCAGAGGAGGATGAA  
ATTTTGAACAGATCACCAAGAAACAGAAAGCCACGAAGAGAGTGAAACAATCTTAAGAGCTTGATCTGTG

ATTTCTTCTCCCTCCTCCCCTGCAAGAGTGGTCCTAGGAGAGGACCTGGCACACCTTAGGTTGACATTCA  
GAAAACTTCAAGACATCACCATCAGCAGGCTCCAGTTGAACACTAGTCTGTGTAACCTTAAACATCTAGC  
AGTAAATACTTGCAGTTGTGATATAAAGGACCCTGTTTCTGTAGAAAAGAAAACATTTAACATAATGGTT  
GTGAAATGTAACATGAAGCAAATAACTTTTTTTTTTTTAAACATCTTGTTTTTAAATAGAATGATAGA  
ACTTTGCCAGTCTTTAAGATCTTGGCTTAATTTAATGTATTAATCTGTTTGTGCAAACATAATACCACCA  
TTTAAAAATGTTAGGGAGATGAGTTGCAGTTTTTATAATAGATTTTTTTTTTAAAGTTTGGTATTGTAAAAC  
ATTCACACCTCTGTCCCTCAAATTGATAATTACGTTTAAAGTGCAGTCATTTGTGGTTAGAATCTTGTT  
TTGTTTGCTTCCATTATTGAGTTCCTCCTAAGGAAATTGAGGAGAGGGACTGAATAGAAGCCCAAATTCA  
TATAAAAGTTGCGTTTAAGTTGTATTAATAATAGATATATAAGAAAAAATCTTTCACCTGATGTTTGTT  
AGACCAGAAAGTGTGTGTGTTCTGTAGCTCAGTTCCAGACAGCTTTTTAGGTAGTGGAGGAGGTGGCTT  
CATGTGGCACTTGGGCATTTATATTCCACTTGGGAGGGTCAGGCTGTGGCCTTCTGGAGCAGGTGGCTTG  
TTAAGGAATGCTAGCAGGGCATGGCACGTGAGCTCCGGAATAGATGTCTTCATCACTTCTTCCACTGTGT  
GTTGACACTGTTTTCTTACCTATTTCTCAGATCCCCAGCTTCTCCTCTGCTATGCATTTTCTTCACA  
GTGCAGCTTGCAGTCCGTTGCTGAAAATGATTATAAGCCCTGCATAATGTTAAGCTTTATTGTGATTACG  
TGTATGTTTCTTCTTTCTTTAAGCAGACCCATACCTTTCCAGGGTCAAAGTACAGAATAGAATACATTG  
ATACAAAGTACAGAAAAATACTTTGATTTTTATCCATTTCTTTTACTCTGTGTAAAGACTTGAGAAGTCT  
AATTCACAGGCAAACCAATACAGAATTGACTGCAGTTGAACAGACTAGAAGTATTTGTGGGAGGAGTGAC  
ATGAAGCATGAGTTATCTGATTTTTTTGTAGCTGCTATATATTTAAGCCTTCATTTGCAATTCATGTA  
ACAGTTGTGTCATAAATTACACAATAAAGCAGTCCTGTTCAAATTTTTTTTTAACGTGGCTTGTAAGATT  
TTTAAAAAAGTGATCTTAGGTTTGTGTTTTTTCATGCGGGATGCAGATGGGTGCTATCAGAGCCTCTCCAC  
ACCACTATAGTGAATAATGTTATTATTACTCTACACTGAAACGTATTCAGAGTTAGATATTATTTAGC  
TTCAGTTGTTCTTTAGAGGCTTTCAAATGTACCGATGATACTGTTTCTTGCACTGAATATATAAACTC  
CACAGTGTGTTATTTGGGAAGATATTGGGAAGGAAATATATTTGTAAAAGATGAAGGCTGTATCTATTTT  
TTTTTCTTTTTAAAGTTTGTTCACTTAAATTCTTTGAGGATGGGATGTATTTTTCTTGCTGTTCAGTGC  
TTTTTCTTTTCATCTGTTGTTCTGTGGTCACAGTGACCTTAGCTACATAGCAGACTTTCCCAAATGTAT

TGATTACAAATAAACAGTTGTTACTTAGCAAGACCTGAAAATATGTCTGCAGGTTTCTCCTTGAAGCAAA  
TGTGTGGGATCATTGCATTTCCAGAAATCTGCCTCCTTCACCCTCCGTTGACAGTATATGTCATGCCTCA  
CTTCTTCTAGCTGAGCTTTAAATCATTAGAGCTTAAATTGTCAGATCGTTCATTGCCTTTCCAGGGTTA  
TTTAGTAAAGTTTGTTGAAAACAAAAACGCCTTTTCTTGTTCTTTTTTCAGTTATTTTGAAGGTCCAGC  
ATCCTGATTAAATGTCTGACACATTAATGAATGACCAGCAGCAGCTTTCAGCTCTTAAAAAGACACTTAT  
ATTTTGATTTTACATGCTGGTTACCTGTTCCATTGTTGTCAAATGCCCACTCTCCATCAGATGTGTTCTT  
CCATTTTCTTATCCACAAAGTACTCCTCACTTTTCAATTTGTCATGTTACTAAATGGTGTTACATTAAAG  
CCCTGTGTTAAGTGTCTGCTTTTGAAGAATTTCTCATAGTAACCTTCAGTGTGTGTGTGTGACTATGT  
TCAATTAGTGGGTTGATCTTCGTATAATTGGCCACTATGTGAGAGTTCCTACTAGGCAGAACTATTAT  
GGACAGTGAAATAATGACTTTTATCTCACCACGTGAGTTTGATGCAGTCTTTTCTGTCTAGCCCTTGCCT  
CTTCCTGCCCATGTGATTGCGGTGCAGTAGTTTCTGTTGTATAATAGTGTGGACAGCAGCTCAGAAAAGG  
AGGGAATGCTACTGATAATTTGTAGATAATATTCTTTAAGACTTAGGGGAACCATTGAACTTTGAAATTT  
TTATTAGAAAATTATTTGTTTCTGAGATCAGACTCCATTATTTTACATATACTTAAATACTTTAGGGGTATT  
TTTGAAAGTTAGCCAGTTTTTTATGTGCTATTAAATTTTATGATTACATACTAAAGAAAAGTATGTACA  
CAGAATGTAGTGCTCCTAGTTACTATTTTTTCTATTAAGAAATAGTTTAGTTCTGGTGTAATTTTGT  
GAATGCTAAAAAAGCAGGACTGCATTATGGCACTTTTGCCTTGGTGGCCCACTTTCTCCATTTA  
AAACATTAGGATTTGTATTTTCTGCTGCGTTTGTATGAAGACATATTTGATTGTTGTTTTCTCTTGATT  
TTAAATAAACCTCATGAGCCCTAGTAAAAA

>NM\_001198868.2 Homo sapiens calpain 1 (CAPN1), transcript variant 1, mRNA

AGCCCGGCCCTCCTCAGAGCAGCTGCCGAGCCGAGGATGTCGGAGGAGATCATCACGCCGGTGTACT  
GCACTGGGGTGTCAGCCCAAGTGCAGAAGCAGCGGGCCAGGGAGCTGGGCCTGGGCCGCCATGAGAATGC  
CATCAAGTACCTGGGCCAGGATTATGAGCAGCTGCGGGTGCGATGCCTGCAGAGTGGGACCCTCTCCGT

GATGAGGCCTTCCCCCGGTACCCAGAGCCTGGGTACAAGGACCTGGGTCCCAATTCTCCAAGACCT  
ATGGCATCAAGTGGAAGCGTCCACGGAAGTCTGTCAAACCCCCAGTTCATTGTGGATGGAGCTACCCG  
CACAGACATCTGCCAGGGAGCACTGGGGGACTGCTGGCTCTTGGCGGCCATCGCCTCCCTCACTCTCAAC  
GACACCCTCTGCACCGAGTGGTTCCGCACGGCCAGAGCTTCCAGAATGGCTATGCCGGCATCTTCATT  
TCCAGCTGTGGCAATTTGGGGAGTGGGTGGACGTGGTCGTGGATGACCTGCTGCCCATCAAGGACGGGAA  
GCTAGTGTTCTGTGCACTCTGCCGAAGGCAACGAGTTCTGGAGCGCCCTGCTTGAGAAGGCCTATGCCAAG  
GTAAATGGCAGCTACGAGGCCCTGTCAGGGGGCAGCACCTCAGAGGGCTTTGAGGACTTCACAGGCGGGG  
TTACCGAGTGGTACGAGTTGCGCAAGGCTCCCAGTGACCTCTACCAGATCATCCTCAAGGCGCTGGAGCG  
GGGCTCCCTGCTGGGCTGCTCCATAGACATCTCCAGCGTTCTAGACATGGAGGCCATCACTTTCAAGAAG  
TTGGTGAAGGGCCATGCCTACTCTGTGACCGGGGCCAAGCAGGTGAACTACCGAGGCCAGGTGGTGAGCC  
TGATCCGGATGCGGAACCCCTGGGGCGAGGTGGAGTGGACGGGAGCCTGGAGCGACAGCTCCTCAGAGTG  
GAACAACGTGGACCCATATGAACGGGACCAGCTCCGGGTCAAGATGGAGGACGGGGAGTTCTGGATGTCA  
TTCCGAGACTTCATGCGGGAGTTCACCCGCCTGGAGATCTGCAACCTCACACCCGACGCCCTCAAGAGCC  
GGACCATCCGCAAATGGAACACCACACTCTACGAAGGCACCTGGCGGCGGGGGAGCACCGCGGGGGGCTG  
CCGAAACTACCCAGCCACCTTCTGGGTGAACCCTCAGTTCAAGATCCGGCTGGATGAGACGGATGACCCG  
GACGACTACGGGGACCGCGAGTCAGGCTGCAGCTTCGTGCTCGCCCTTATGCAGAAGCACCGTCGCCCGG  
AGCGCCGCTTCGGCCGCGACATGGAGACTATTGGCTTCGCGGTCTACGAGGTCCCTCCGGAGCTGGTGGG  
CCAGCCGGCCGTACACTTGAAGCGTGACTTCTTCTGGCCAATGCGTCTCGGGCGCGCTCAGAGCAGTTC  
ATCAACCTGCGAGAGGTCAGCACCCGCTTCGCTGCCACCCGGGGAGTATGTGGTGGTGCCCTCCACCT  
TCGAGCCCAACAAGGAGGGCGACTTCGTGCTGCGCTTCTTCTCAGAGAAGAGTGCTGGGACTGTGGAGCT  
GGATGACCAGATCCAGGCCAATCTCCCCGATGAGCAAGTGCTCTCAGAAGAGGAGATTGACGAGAACTTC  
AAGGCCCTCTCAGGCAGCTGGCAGGGGAGGACATGGAGATCAGCGTGAAGGAGTTGCGGACAATCCTCA  
ATAGGATCATCAGCAAACACAAAGACCTGCGGACCAAGGGCTTCAGCCTAGAGTCGTGCCGAGCATGGT  
GAACCTCATGGATCGTGATGGCAATGGGAAGCTGGGCCTGGTGGAGTTCAACATCCTGTGGAACCGCATC  
CGGAATTACCTGTCCATCTTCGGAAGTTTGACCTGGACAAGTCGGGCAGCATGAGTGCCTACGAGATGC

GGATGGCCATTGAGTCGGCAGGCTTCAAGCTCAACAAGAAGCTGTACGAGCTCATCATCACCCGCTACTC  
GGAGCCCGACCTGGCGGTGCACTTTGACAATTTGTTTTGCTGCCTGGTGCGGCTAGAGACCATGTTCCGA  
TTTTTCAAACCTCTGGACACAGATCTGGATGGAGTTGTGACCTTTGACTTGTTTAAGTGGTTGCAGCTGA  
CCATGTTTGCATGAGGCAGGGACTCGGTCCCCCTTGCCGTGCTCCCCCTCCTCCTCGTCTGCCAAGCCTC  
GCCTCTACCACACCACACCAGGCCACCCCAGCTGCAAGTGCCTTCCTTGGAGCAGAGAGGCAGCCTCGT  
CCTCCTGTCCCCTCTCCTCCCAGCCACCATCGTTCATCTGCTCCGGGCAGAACTGTGTGGCCCCCTGCCTG  
TGCCAGCCATGGGCTCGGGATGGACTCCCTGGGCCCCACCCATTGCCAAGCCAGGAAGGCAGCTTTCGCT  
TGTTCTGCCTCGGGACAGCCCCGGGTTTCCCCAGCATCCTGATGTGTCCCCTCTCCCCACTTCAGAGGC  
CACCCACTCAGCACACCAGGCCTGGCCTTGCCTGCAGACTATAAACTATAACCACTAGCTCGACACAGTC  
TGCAGTCCAGGCGTGTGGAGCCGCCTCCCGGCTCGGGGAGGCCCGGGGCTGGGAACGCCTGTGCCTTCC  
TGCGCCGAAGCCAACGCCCCCTCTGTCTTCCCTGGCCCTGCTGCCGACCAGGAGCTGCCAGCCTGTGG  
GCGGTGCGCCTTCCCTCCTTCGCTCCTTTTTTATATTAGTGATTTTAAAGGGGACTCTTCAGGGACTTGT  
GTACTGGTTATGGGGGTGCCAGAGGCACTAGGCTTGGGGTGGGGAGGTCCCGTGTTCATATAGAGGAAC  
CCCAAATAATAAAAGGCCCCACATCTGTCTGTGA

>NM\_023083.4 Homo sapiens calpain 10 (CAPN10), transcript variant 1, mRNA

AGACTAGCGGGCCGGCGTACTGGCCTGGTCCAGCACCTGCGGGGCCCTCGGGCTTGGAGGGCTGGGCCGG  
GCGGGGAACGGGCGGGGCGGGCCGGAGGCGGCGGGCTGACTCGCCTTCTCTCCGGGGCTGCGACCCCG  
AGGCAACCGGCTGCAGATGGGAGCCCGGAGCCGAGGATGCGGGCGGGCCGGGGCGCGACCCGGCGAG  
GGAGCTGTTCCGGGACGCCGCTTCCCCGCCGCGGACTCCTCGCTCTTCTGCGACTTGTCTACGCCGCTG  
GCCAGTTCCGCGAGGACATCACGTGGAGGCGGGCCCGAGAGATTTGTGCCACACCCCGGCTGTTTCCAG  
ATGACCCACGGGAAGGGCAGGTGAAGCAGGGGCTGCTGGGGGATTGCTGGTTCCTGTGTGCCTGCGCCGC  
GCTGCAGAAGAGCAGGCACCTCCTGGACCAGGTCATTCTCCGGGACAGCCGAGCTGGGCCGACCAGGAG

TACCGGGGCTCCTTCACCTGTCGCATTTGGCAGTTTGGACGCTGGGTGGAGGTGACCACAGATGACCGCC  
TGCCGTGCCTTGACAGGGAGACTCTGTTTCTCCCGCTGCCAGAGGGAGGATGTGTTCTGGCTCCCCTTACT  
GGAAAAGGTCTACGCCAAGGTCCATGGGTCTACGAGCACCTGTGGGCCGGGCAGGTGGCGGATGCCCTG  
GTGGACCTGACCGGCGGCCTGGCAGAAAGATGGAACCTGAAGGGCGTAGCAGGAAGCGGAGGCCAGCAGG  
ACAGGCCAGGCCGCTGGGAGCACAGGACTTGTGGCAGCTGCTCCACCTGAAGGACCAGTGTCTGATCAG  
CTGCTGCGTGCTCAGCCCCAGAGCAGGTGCCCCGGGAGCTGGGGGAGTTCCATGCCTTCATTGTCTCGGAC  
CTGCGGGAGCTCCAGGGTCAGGCGGGCCAGTGCATCCTGCTGCTGCGGATCCAGAACCCCTGGGGCCGGC  
GGTGCTGGCAGGGGCTCTGGAGAGAGGGGGGTGAAGGGTGGAGCCAGGTAGATGCAGCGGTAGCATCTGA  
GCTCCTGTCCCAGCTCCAGGAAGGGGAGTTCTGGGTGGAGGAGGAGGAGTTCCTCAGGGAGTTTGACGAG  
CTCACCGTTGGCTACCCGGTCACGGAGGCCGGCCACCTGCAGAGCCTCTACACAGAGAGGCTGCTCTGCC  
ATACGCGGGCGCTGCCTGGGGCCTGGGTCAAGGGCCAGTCAGCAGGAGGCTGCCGGAACAACAGCGGCTT  
TCCCAGCAACCCCAAATTCTGGCTGCGGGTCTCAGAACCGAGTGAGGTGTACATTGCCGTCTGCAGAGA  
TCCAGGCTGCACGCGGCGGACTGGGCAGGCCGGGCCCCGGGCACTGGTGGGTGACAGTCATACTTCGTGGA  
GCCCAGCGAGCATCCCGGGCAAGCACTACCAGGCTGTGGGTCTGCACCTCTGGAAGGTAGAGAAGCGGCG  
GGTCAATCTGCCTAGGGTCTGTCCATGCCCCCGTGGCTGGCACCGCGTGCCATGCATACGACCGGGAG  
GTCCACCTGCGTTGTGAGCTCTACCGGGCTACTACCTGGCTGTCCCCAGCACCTTCTGAAGGACGCGC  
CAGGGGAGTTCCTGCTCCGAGTCTTCTCTACCGGGCGAGTCTCCCTTAGCGCCATCAGGGCAGTGGCCAA  
GAACACCACCCCCGGGGCAGCCCTGCCTGCGGGGGAGTGGGGGACCGTGCAGCTACGGGGTTCTTGAGAG  
GTCGGCCAGACGGCGGGGGGCAGCAGGAACTTTGCCTCATACCCACCAACCCCTGCTTCCCCTTCTCGG  
TCCCCGAGGGCCCTGGCCCCGCTGCGTCCGCATCACTCTGCATCAGCACTGCCGGCCAGTGACACCGA  
GTTCCACCCCATCGGCTTCCATATCTTCCAGGTCCCAGAGGGTGAAGGAGCCAGGACGCACCCCCACTG  
CTGCTGCAGGAGCCGCTGCTGAGCTGCGTGCCACATCGCTACGCCAGGAGGTGAGCCGGCTCTGCCTCC  
TGCCTGCGGGCACCTACAAGGTTGTGCCCTCCACCTACCTGCCGGACACAGAGGGGGCCTTCACAGTGAC  
CATCGCAACCAGGATTGACAGGCCATCCATTACAGCCAGGAGATGCTGGGCCAGTTCCTCCAAGAGGTC  
TCCATCATGGCAGTGATGAAAACCTAACAGGGTGGCCCCCTGTGCCAGCTCAGGTGACTGGAGCCCCGAGG

GCCTGACAGGTTCCCAGCAGCTGGGCCGGCCAGCCTTGCACTGTGGGGGCTGGTCCTGAGTCTTGGCCTG  
CCTCCCAGCCCTGCCAGGAGGCTGCGGCCTAGGGGTCCACGGGAAGCCTCCGTCAGGAGAGACGCAGCCC  
TGGGGGCCAGCTGGTGCTGCAAGGAAGGGTGGGAAGCTTGCTGGCTTCTGTTGCGCCACTGAGACGGCAG  
AGACCCAGGATCCCAGAGCTTCCCAGGATCCCTCCCAGATCCTCTGCTGACTCCATATGGAGGCCTCAC  
ACCCAGAGGGTAGGGCAGCAGATCTTCTTTATAACTATTTATTGTTGGAATCACTTTTAGGATGTAATT  
TATAAATAAACATGAGCGCTGATGATTTGCA

>NM\_001748.5 Homo sapiens calpain 2 (CAPN2), transcript variant 1, mRNA

AGTGGCCGCAGCAGCGCGCCGGGCCCTGGCCGCGCCCCAGCCGAGCGCAGCGCGGAGTCGCCCCGACCTT  
TCTCTGCGCAGTACGGCCCGGGACCGCAGCATGGCGGGCATCGCGGCCAAGCTGGCGAAGGACCGGGA  
GGCGGCCGAGGGGCTGGGCTCCCACGACAGGGCCATCAAGTACCTCAACCAGGACTACGAGGCGCTGCGG  
AACGAGTGCCTGGAGGCCGGGACGCTCTTCCAGGACCCGTCCTTCCCGGCCATCCCCTCGGCCCTGGGCT  
TCAAGGAGTTGGGGCCCTACTCCAGCAAAACCCGGGGCATCGAGTGGAAGCGCCCCACGGAGATCTGCGC  
TGACCCCCAGTTTATCATTGGAGGAGCCACCCGCACAGACATCTGCCAAGGAGCCCTGGGTGACTGCTGG  
CTGCTGGCAGCCATTGCCTCCCTCACCTTGAATGAAGAAATCCTGGCTCGAGTCGTCCTTAAACCAGA  
GCTTCCAGGAAAATATGCAGGGATCTTCACTTCCAGTTCTGGCAATACGGCGAGTGGGTGGAGGTGGT  
GGTGGATGACAGGCTGCCACCAAGGACGGGGAGCTGCTCTTTGTGCATTAGCCGAAGGGAGCGAGTTC  
TGGAGCGCCCTGCTGGAGAAGGCATACGCCAAGATCAACGGATGCTATGAAGCGCTATCAGGGGGTGCCA  
CCTGAGGGCTTGAAGACTTACCGGAGGCATTGCTGAGTGATGAGTTGAAGAAGCCCCCTCCCAA  
CCTGTTCAAGATCATCCAGAAAGCTCTGCAAAAAGGCTCTCTCCTTGGCTGCTCCATCGACATCACCAGC  
GCCGCGGACTCGGAGGCCATCACGTTTCAGAAGCTGGTGAAGGGGCACGCGTACTCGGTCACCGGAGCCG  
AGGAGGTTGAAAGTAACGGAAGCCTACAGAACTGATCCGCATCCGAAATCCCTGGGGAGAAAGTGGAGTG  
GACAGGGCGGTGGAATGACAACTGCCAAGCTGGAACACTATAGACCCAGAGGAGAGGGAAAGGCTGACC

AGACGGCATGAAGATGGAGAATTCTGGATGTCTTTCAGTGACTTCCTGAGGCACTATTCCCGCCTGGAGA  
TCTGTAACCTGACCCAGACACTCTCACCAGCGATACCTACAAGAAGTGGAACCTACCAAAATGGATGG  
GAACTGGAGGCGGGGCTCCACCGCGGGAGGTTGCAGGAACTACCCGAACACATTCTGGATGAACCCTCAG  
TACCTGATCAAGCTGGAGGAGGAGGATGAGGACGAGGAGGATGGGGAGAGCGGCTGCACCTCCTGGTG  
GGCTCATTGAGAAGCACCGACGGCGGCAGAGGAAGATGGGCGAGGACATGCACACCATCGGCTTTGGCAT  
CTATGAGGTTCCAGAGGAGTTAAGTGGGCAGACCAACATCCACCTCAGCAAAAATTCTTCTGACGAAT  
CGCGCCAGGGAGCGCTCAGACACCTTCATCAACCTCCGGGAGGTGCTCAACCGCTTCAAGCTGCCGCCAG  
GAGAGTACATTCTCGTGCCTTCACCTTCGAACCCAACAAGGATGGGGATTTCTGCATCCGGGTCTTTTC  
TGAAAAGAAAGCTGACTACCAAGCTGTCGATGATGAAATCGAGGCCAATCTTGAAGAGTTCGACATCAGC  
GAGGATGACATTGATGATGGATTGAGGAGACTGTTTGCCAGTTGGCAGGAGAGGATGCGGAGATCTCTG  
CCTTGAGCTGCAGACCATCCTGAGAAGGGTTCTAGCAAAGCGCCAAGATATCAAGTCAGATGGCTTCAG  
CATCGAGACATGCAAAATTATGGTTGACATGCTAGATTCGGACGGGAGTGGCAAGCTGGGGCTGAAGGAG  
TTCTACATTCTCTGGACGAAGATTCAAAAATACCAAAAAATTTACCGAGAAATCGACGTTGACAGGTCTG  
GTACCATGAATTCCTATGAAATGCGGAAGGCATTAGAAGAAGCAGGTTTCAAGATGCCCTGTCAACTCCA  
CCAAGTCATCGTTGCTCGGTTTGAGATGACCAGCTCATCATCGATTTTGATAATTTGTTGCGGTGTTTG  
GTTGCGGCTGGAAACGCTATTCAAGATATTTAAGCAGCTGGATCCCGAGAATACTGGAACAATAGAGCTCG  
ACCTTATCTCTGGCTCTGTTTCTCAGTACTTTGAAGTTATACTAATCTGCCTGAAGACTTCTCATGAT  
GGAAAATCAGCCAAGGACTAAGCTTCCATAGAAATACACTTTGTATCTGGACCTCAAATTATGGGAACA  
TTTACTTAAACGGATGATCATAGCTGAAAATAATGATACTGTCAATTTGAGATAGCAGAAGTTTCACACA  
TCAAAGTAAAAGATTTGCATATCATTATACTAAATGCAAATGAGTCGCTTAACCTTGACAAGGTCAAAG  
AAAGCTTTAAATCTGTAAATAGTATACACTTTTTACTTTTACACACTTTCCTGTTTCATAGCAATATTAAA  
TCAGGAAAAAAAATGCAGGGAGGTATTTAACAGCTGAGCAAAAACATTGAGTCGCTCTCAAAGGACACG  
AGGCCCTTGGCAGGGAATATTTAAAGCAACTTCAAGTTTAAAATGCAGCTGTTGATTCTACCAAACAACA  
GTCCAAGATTACCATTTCCCATGAGCCAACCTGGGAAACATGGTATATCATGAAGTAATCTGTCAAGGCA  
TCTGGAGAGTCCAGGAGAGAAGACTCACCTCTGTCGCTTGGGTAAACAAGAGACAGGTTTTGTAGAATA

TTGATTGGTAATAGTAAATCGTTCTCCTTACAATCAAGTTCTTGACCCTATTCGGCCTTATACATCTGGT  
CTTACAAAGACCAAAGGGATCCTGCGCTTGATCAACTGAACCAGTATGCCAAAACCAGGCATCCAATTTG  
TAAACCAATTATGATAAAGGACAAAATAAGCTGTTTGCCACCTCAAACTTTATGAACTTCACCACCACT  
AGTGTCTGTCCATGGAGTTAGAGGGGACATCACTTAGAAGTTCTTATAGAAAGGACACAAGTTTGTTTCC  
TGGCTTTACCTTGGGAAAATGCTAGCAACATTATAGAAATTTTGCCTTGTTGCCTTATCTTCTTCAAAT  
GTACTGTAAATAAAAAATAAAGGGTTACCCCATGCAATCACACCATGCCATGTTTTCTTCCTGGAGGGC  
AGCCCCACAGGACGGTTTATGAGCACACAATTATAGCTTGTCTACTTTAACAAGGTATGCTGCCTCTG  
TAAATTCATGTATTCAAAGGAAAAGACACCTGCCTATAATTAATGTGGAACATAAAATTTTTTAA  
ATCCAA

>NM\_001003962.3 Homo sapiens calpain small subunit 1 (CAPNS1), transcript variant 2, mRNA

GAGTCACCGGCCCCGCCCTCCGGAGCCGGACGCTGCGGGAGGCCCGGGAGCGGCAGTGGAACCGACTCCC  
AGAACTCCGGACGTGTGCGGCGTGAGTCGCAGCCATGTTCTGGTTAACTCGTTCTTGAAGGGCGGCGGC  
GGCGGCGGCGGGGGAGGCGGGGGCCTGGGTGGGGCCTGGGAAATGTGCTTGGAGGCCTGATCAGCGGGG  
CCGGGGGCGGCGGCGGCGGCGGCGGCGGCGGCGGCGGTGGTGGAGGCGGCGGTGGCGGTGGAACGGCCAT  
GCGCATCCTAGGCGGAGTCATCAGCGCCATCAGCGAGGCGGCTGCGCAGTACAACCCGGAGCCCCCGCCC  
CCACGCACACATTACTCCAACATTGAGGCCAACGAGAGTGAGGAGGTCCGGCAGTTCCGGAGACTCTTTG  
CCCAGCTGGCTGGAGATGACATGGAGGTCAGCGCCACAGAACTCATGAACATTCTCAATAAGGTTGTGAC  
ACGACACCCTGATCTGAAGACTGATGGTTTTGGCATTGACACATGTCGCAGCATGGTGGCCGTGATGGAT  
AGCGACACCACAGGCAAGCTGGGCTTTGAGGAATTCAAGTACTTGTGGAACAACATCAAAAGGTGGCAGG  
CCATATACAAACAGTTCGACACTGACCGATCAGGGACCATTTCAGTAGTGAACTCCAGGTGCCTTTGA  
GGCAGCAGGGTTCCACCTGAATGAGCATCTCTATAACATGATCATCCGACGCTACTCAGATGAAAGTGGG  
AACATGGATTTTGACAACTTCATCAGCTGCTTGGTCAGGCTGGACGCCATGTTCCGTGCCTTCAAATCTC

TTGACAAAGATGGCACTGGACAAATCCAGGTGAACATCCAGGAGTGGCTGCAGCTGACTATGTATTCCTG  
AACTGGAGCCCCAGACCCGCCCCCTCACTGCCTTGCTATAGGAGTCACCTGGAGCCTCGGTCTCTCCAG  
GGCCGATCCTGTCTGCAGTCACATCTTTGTGGGGCCTGCTGACCCACAAGCTTTTGTCTCTCAGTACTT  
GTTACCCAGCTTCTCAACATCCAGGGCCCAATTTGCCCTGCCTGGAGTTCCCCCTGGCTCTAGGACACTC  
TAACAAGCTCTGTCCACGGGTCTCCCCATTCCCACCAGGCCCTGCACACACCCACTCCGTAACCTCTCCC  
CTGTACCTGTGCCAAGCCTAGCACTTGATGCCTCCATGCCCCGAGGGCCCTCTCTCAGTTCTGGGAGG  
ATGACTCCAGTCCCTGCACGCCCTGGCACACCCTTCACGGTTGCTACCCAGGCGGCCAAGCTCCAGACCG  
TGCCAGACCCAGGTGCCCCAGTGCCTTTGTCTATATTCTGCTCCCAGCCTGCCAGGCCAGGAGGAAATA  
AACATGCCCCAGTTGCTGATCTCTA

>NM\_033292.4 Homo sapiens caspase 1 (CASP1), transcript variant alpha, mRNA

CAGTCACACAAGAAGGGAGGAGAGAAAAGCCATGGCCGACAAGGTCCTGAAGGAGAAGAGAAAGCTGTTT  
ATCCGTTCCATGGGTGAAGGTACAATAAATGGCTTACTGGATGAATTATTACAGACAAGGGTGCTGAACA  
AGGAAGAGATGGAGAAAGTAAACGTGAAAATGCTACAGTTATGGATAAGACCCGAGCTTTGATTGACTC  
CGTTATTCCGAAAGGGGCACAGGCATGCCAAATTTGCATCACATACATTTGTGAAGAAGACAGTTACCTG  
GCAGGGACGCTGGGACTCTCAGCAGATCAAACATCTGGAAATTACCTTAATATGCAAGACTCTCAAGGAG  
TACTTTCTTCCTTTCCAGCTCCTCAGGCAGTGCAGGACAACCCAGCTATGCCACATCCTCAGGCTCAGA  
AGGGAATGTCAAGCTTTGCTCCCTAGAAGAAGCTCAAAGGATATGGAAACAAAAGTCGGCAGAGATTTAT  
CCAATAATGGACAAGTCAAGCCGCACACGTCTTGCTCTCATTATCTGCAATGAAGAATTTGACAGTATTC  
CTAGAAGAACTGGAGCTGAGGTTGACATCACAGGCATGACAATGCTGCTACAAAATCTGGGGTACAGCGT  
AGATGTGAAAAAAAATCTCACTGCTTCGGACATGACTACAGAGCTGGAGGCATTTGCACACCGCCCAGAG  
CACAAGACCTCTGACAGCACGTTCTGGTGTTTCATGTCTCATGGTATTCGGGAAGGCATTTGTGGGAAGA  
AACACTCTGAGCAAGTCCCAGATATACTACAACTCAATGCAATCTTTAACATGTTGAATACCAAGAACTG

CCCAAGTTTGAAGGACAAACCGAAGGTGATCATCATCCAGGCCTGCCGTGGTGACAGCCCTGGTGTGGTG  
TGGTTTAAAGATTCAGTAGGAGTTTCTGGAAACCTATCTTTACCAACTACAGAAGAGTTTGAGGATGATG  
CTATTAAGAAAGCCCACATAGAGAAGGATTTTATCGCTTCTGCTCTTCCACACCAGATAATGTTTCTTG  
GAGACATCCCACAATGGGCTCTGTTTTTATTGGAAGACTCATTGAACATATGCAAGAATATGCCTGTTCC  
TGTGATGTGGAGGAAATTTCCGCAAGGTTGATTTTCATTTGAGCAGCCAGATGGTAGAGCGCAGATGC  
CCACCACTGAAAGAGTGACTTTGACAAGATGTTTCTACCTCTTCCAGGACATTAAAATAAGGAAACTGT  
ATGAATGTCTGTGGGCAGGAAGTGAAGAGATCCTTCTGTAAAGGTTTTTGAATTATGTCTGCTGAATAA  
TAACTTTTTTGAATAATAAATCTGGTAGAAAAATGAAAACCTGTCCTCATTTTTCTCCCACTGAAG  
AAACAGGGACTGGAACCTAGAGTGACTAAGGAATTT

>NM\_004346.4 Homo sapiens caspase 3 (CASP3), transcript variant 1, mRNA

AGTGCAGACGCGGCTCCTAGCGGATGGGTGCTATTGTGAGGCGGTTGTAGAAGAGTTTCGTGAGTGCTCG  
CAGCTCATACCTGTGGCTGTGTATCCGTGGCCACAGCTGGTTGGCGTCGCCTTGAAATCCCAGGCCGTGA  
GGAGTTAGCGAGCCCTGCTCACACTCGGCGCTCTGGTTTTCGGTGGGTGTGCCCTGCACCTGCCTCTTCC  
CCCATTCTCATTATAAAGGTATCCATGGAGAACTGAAAACCTCAGTGGATTCAAAATCCATTAAAAAT  
TTGGAACCAAAGATCATACATGGAAGCGAATCAATGGACTCTGGAATATCCCTGGACAACAGTTATAAAA  
TGGATTATCCTGAGATGGGTTTATGTATAATAATTAATAATAAGAATTTTCATAAAAGCACTGGAATGAC  
ATCTCGGTCTGGTACAGATGTTCGATGCAGCAAACCTCAGGGAAACATTCAGAAACTTGAAATATGAAGTC  
AGGAATAAAAATGATCTTACACGTGAAGAAATTGTGGAATTGATGCGTGATGTTTCTAAAGAAGATCACA  
GCAAAGGAGCAGTTTTGTTGTGTGCTTCTGAGCCATGGTGAAGAAGGAATAATTTTTGGAACAAATGG  
ACCTGTTGACCTGAAAAAATAACAACTTTTTTCAGAGGGGATCGTTGTAGAAGTCTAACTGGAAAACCC  
AACTTTTTTCATTATTCAGGCCTGCCGTGGTACAGAACTGGACTGTGGCATTGAGACAGACAGTGGTGTG  
ATGATGACATGGCGTGTCAAAAATACCACTGGAGGCCGACTTCTTGATGCATACTCCACAGCACCTGG

TTATTATTCTTGGCGAAATTCAAAGGATGGCTCCTGGTTCATCCAGTCGCTTTGTGCCATGCTGAAACAG  
TATGCCGACAAGCTTGAATTTATGCACATTCTTACCCGGGTTAACCGAAAGGTGGCAACAGAATTTGAGT  
CCTTTTCCTTGACGCTACTTTTCATGCAAAGAAACAGATTCCATGTATTGTTTCCATGCTCACAAAAGA  
ACTCTATTTTTATCACTAAAGAAATGGTTGGTTGGTGGTTTTTTTTAGTTTGTATGCCAAGTGAGAAGAT  
GGTATATTTGGTACTGTATTTCCCTCTCATTTTGACCTACTCTCATGCTGCAGAGGGTACTTTAAGACAT  
ACTCCTTCCATCAAATAGAACCACTATGAAGCTACCTCAAACCTCCAGTCAGGTAGTTGCAATTGAATTA  
AATTAGGAATAAATAAAAATGGATACTGGTGCAGTCATTATGAGAGGCAATGATTGTTAATTTACAGCTT  
TCATGATTAGCAAGTTACAGTGATGCTGTGCTATGAATTTTCAAGTAATTGTGAAAAAGTTAAACATTGA  
AGTAATGAATTTTTATGATATTCCCCCACTTAAGACTGTGTATTCTAGTTTTGTCAAACCTGTAGAAATG  
ATGATGTGGAAGAAGCTTAGGCATCTGTGGGCATGGTCAAAGGCTCAAACCTTTATTTTAGAATTGATATA  
CACGGATGACTTAACTGCATTTTAGACCATTTATCTGGGATTATGGTTTTGTGATGTTTGCCTGAACA  
CTTTTGTGTAAAAAATAATAAATGTTTAATATTGAGAAAGAACTAATATTTTATGTGAGAGAAAG  
TGTGAGCAAACCTTGAAGCTTTTAAAGGCTAAACCTTAACATTCATAGAGGGGTGGAGTTTTAACTGTAA  
GGTGCTACAATGCCCCTGGATCTACCAGCATAAATATCTTCTGATTTGTCCCTATGCATATCAGTTGAGC  
TTCATATACCAGCAATATATCTGAAGAGCTATTATATAAAAAACCCCAAACCTGTTGATTATTAGCCAGGTA  
ATGTGAATAAATTCTATAGGAACATATGAAAATACAACCTTAAATAATAAACAGTGGAATATAAGGAAAGC  
AATAAATGAATGGGCTGAGCTGCCTGTAACCTGAGAGTAGATGGTTTGAGCCTGAGCAGAGACATGACTC  
AGCCTGTTCCATGAAGGCAGAGCCATGGACCACGCAGGAAGGGCCTACAGCCCATTCTCCATACGCACT  
GGTATGTGTGGATGATGCTGCCAGGGCGCCATCGCCAAGTAAGAAAGTGAAGCAAATCAGAACTTGTGA  
AGTGGAATGTTCTAAAGGTGGTGAGGCAATAAAAATCATAGTACTCTTTGTAGCAAAATTCTTAAGTAT  
GTTATTTTCTGTTGAAGTTTACAATCAAAGGAAAAATAGTAATGTTTTATACTGTTTACTGAAAGAAAAAG  
ACCTATGAGCACATAGGACTCTAGACGGCATCCAGCCGGAGGCCAGAGCTGAGCCCTCAGCCCGGAGGC  
AGGCTCCAGGCCTCAGCAGGTGCGGAGCCGTCACTGCACCAAGTCTCACTGGCTGTCAGTATGACATTTT  
ACGGGAGATTTCTTGTTGCTCAAAAATGAGCTCGCATTTGTCAATGACAGTTTCTTTTTCTTACTAGA  
CCTGTAACCTTTGTAAATACATAGCATGTAATGGTATCTTAAAGTGTGTTTCTATGTGACAATTTTGT

ACAAATTTGTTATTTTCCATTTTATTTCAAATATACATTCAAACCTTAAATTA

>NM\_001225.4 Homo sapiens caspase 4 (CASP4), transcript variant alpha, mRNA

ACTCTGAGGCTCTTCCAACGCTGTAAAAAAGGACAGAGGCTGTTCCCTATGGCAGAAGGCAACCACAGA  
AAAAAGCCACTTAAGGTGTTGGAATCCCTGGGCAAAGATTTCTCACTGGTGTTTTGGATAACTTGGTGG  
AACAAAATGTACTGAACTGGAAGGAAGAGGAAAAAAGAAATATTACGATGCTAAAACCTGAAGACAAAGT  
TCGGGTCATGGCAGACTCTATGCAAGAGAAGCAACGTATGGCAGGACAAATGCTTCTTCAAACCTTTTTT  
AACATAGACCAAATATCCCCAATAAAAAAGCTCATCCGAATATGGAGGCTGGACCACCTGAGTCAGGAG  
AATCTACAGATGCCCTCAAGCTTTGTCCTCATGAAGAATTCCTGAGACTATGTAAAGAAAGAGCTGAAGA  
GATCTATCCAATAAAGGAGAGAAACAACCGCACACGCCTGGCTCTCATCATATGCAATACAGAGTTTGAC  
CATCTGCCTCCGAGGAATGGAGCTGACTTTGACATCACAGGGATGAAGGAGCTACTTGAGGGTCTGGACT  
ATAGTGTAGATGTAGAAGAGAATCTGACAGCCAGGGATATGGAGTCAGCGCTGAGGGCATTGCTACCAG  
ACCAGAGCACAAGTCCTCTGACAGCACATTCTTGGTACTCATGTCTCATGGCATCCTGGAGGGAATCTGC  
GGAAGTGTGCATGATGAGAAAAAACCAGATGTGCTGCTTTATGACACCATCTTCCAGATATTCAACAACC  
GCAACTGCCTCAGTCTGAAGGACAAACCCAAGGTCATCATTGTCCAGGCCTGCAGAGGTGCAAACCGTGG  
GGAAGTGTGGGTCAGAGACTCTCCAGCATCCTTGAAGTGGCCTCTTACAGTCATCTGAGAACCTAGAG  
GAAGATGCTGTTTACAAGACCCACGTGGAGAAGGACTTCATTGCTTTCTGCTCTTCAACGCCACACAACG  
TGTCTGGAGAGACAGCACAATGGGCTCTATCTTCATCACAACTCATCACATGCTTCCAGAAATATTC  
TTGGTGCTGCCACCTAGAGGAAGTATTTGGAAGGTACAGCAATCATTTGAAACTCCAAGGGCCAAAGCT  
CAAATGCCCACCATAGAACGACTGTCCATGACAAGATATTTCTACCTCTTCTGGCAATTGAAAATGGA  
AGCCACAAGCAGCCCAGCCCTCCTTAATCAACTTCAAGGAGCACCTTCATTAGTACAGCTTGCATATTTA  
ACATTTTGTATTTCAATAAAAGTGAAGACAAACGAA

>NM\_001228.4 Homo sapiens caspase 8 (CASP8), transcript variant 1, mRNA

GTGCTCTGAGTTTTTGGTTTCTGTTTCACCTTGTGTCTGAGCTGGTCTGAAGGCTGGTTGTTTCAGACTGA  
GCTTCCTGCCTGCCTGTACCCCGCCAACAGCTTCAGAAGAAGGTGACTGGTGGCTGCCTGAGGAATACCA  
GTGGGCAAGAGAATTAGCATTTCTGGAGCATCTGCTGTCTGAGCAGCCCCTGGGTGCGTCCACTTTCTGG  
GCACGTGAGGTTGGGCCTTGGCCGCTGAGCCCTTGAGTTGGTCACTTGAACCTTGGGAATATTGAGATT  
ATATTCTCCTGCCTTTTAAAAAGATGGACTTCAGCAGAAATCTTTATGATATTGGGGAACAACCTGGACAG  
TGAAGATCTGGCCTCCCTCAAGTTCCTGAGCCTGGACTACATTCCGCAAAGGAAGCAAGAACCCATCAAG  
GATGCCTTGATGTTATTCCAGAGACTCCAGGAAAAGAGAATGTTGGAGGAAAGCAATCTGTCCTTCCTGA  
AGGAGCTGCTCTTCCGAATTAATAGACTGGATTTGCTGATTACCTACCTAAACACTAGAAAGGAGGAGAT  
GGAAAGGGAACTTCAGACACCAGGCAGGGCTCAAATTTCTGCCTACAGGTTCCACTTCTGCCGCATGAGC  
TGGGCTGAAGCAAACAGCCAGTGCCAGACACAGTCTGTACCTTTCTGGCGGAGGGTCGATCATCTATTAA  
TAAGGGTCATGCTCTATCAGATTTTCAAGAAGTGAGCAGATCAGAATTGAGGTCTTTTAAGTTTCTTTT  
GCAAGAGGAAATCTCCAAATGCAAACCTGGATGATGACATGAACCTGCTGGATATTTTCATAGAGATGGAG  
AAGAGGGTCATCCTGGGAGAAGGAAAGTTGGACATCCTGAAAAGAGTCTGTGCCCAAATCAACAAGAGCC  
TGCTGAAGATAATCAACGACTATGAAGAATTCAGCAAAGGGGAGGAGTTGTGTGGGGTAATGACAATCTC  
GGACTCTCCAAGAGAACAGGATAGTGAATCACAGACTTTGGACAAAGTTTACCAAATGAAAAGCAAACCT  
CGGGGATACTGTCTGATCATCAACAATCACAATTTTGCAAAGCACGGGAGAAAGTGCCCAAACCTTCACA  
GCATTAGGGACAGGAATGGAACACACTTGATGCAGGGGCTTTGACCACGACCTTTGAAGAGCTTCATTT  
TGAGATCAAGCCCCACGATGACTGCACAGTAGAGCAAATCTATGAGATTTTGAAAATCTACCAACTCATG  
GACCACAGTAACATGGACTGCTTCATCTGCTGTATCCTCTCCCATGGAGACAAGGGCATCATCTATGGCA  
CTGATGGACAGGAGGCCCCCATCTATGAGCTGACATCTCAGTTCACTGGTTTGAAGTGCCCTTCCCTTGC  
TGGAACCAAGTGTGTTTATTCAGGCTTGTGAGGGGGATACTACCAGAAAGGTATACCTGTTGAG

ACTGATTCAGAGGAGCAACCCTATTTAGAAATGGATTTATCATCACCTCAAACGAGATATATCCCGGATG  
AGGCTGACTTTCTGCTGGGGATGGCCACTGTGAATAACTGTGTTTCCTACCGAAACCCTGCAGAGGGAAC  
CTGGTACATCCAGTCACTTTGCCAGAGCCTGAGAGAGCGATGTCCTCGAGGCGATGATATTCTCACCATC  
CTGACTGAAGTGAAGTATGAAGTAAGCAACAAGGATGACAAGAAAAACATGGGGAAACAGATGCCTCAGC  
CTACTTTCACACTAAGAAAAAACTTGCTTCCCTTCTGATTGATGGTGCTATTTTGTTGTTTTGTTTT  
GTTTTGTTTTTTTGGAGACAGAATCTCGCTCTGTCGCCAGGCTGGAGTGCAGTGGCGTGATCTCGGCTCA  
CCGCAAGCTCCGCCTCCCGGGTTCAGGCCATTCTCCTGCCTCAGCCTCCCGAGTAGCTGGGACTACAGGG  
GCCCCCACCACACCTGGCTAATTTTTTAAAAATATTTTTAGTAGAGACAGGGTTTCACTGTGTTAGCCA  
GGGTGGTCTTGATCTCCTGACCTCGTGATCCACCCACCTCGGCCTCCCAAAGTGCTGGGATTACAGGCGT  
GAGCCACCGCGCCTGGCCGATGGTACTATTTAGATATAAACTATGTTTATTTACTAATTTTCTAGATT  
TCTACTTTATTAATTGTTTTGCACTTTTTTATAAGAGCTAAAGTTAAATAGGATATTAACAACAATAACA  
CTGTCTCCTTTCTCTTATGCTTAAGGCTTTGGGAATGTTTTAGCTGGTGGCAATAAATACCAGACACGT  
ACAAAATCCAGCTATGAATATAGAGGGCTTATGATTCAGATTGTTATCTATCAACTATAAGCCCACTGTT  
AATATTCTATTAACTTTAATTCTCTTTCAAAGCTAAATTCCACACTACCACATTAAAAAAATTAGAAAGT  
AGCCACGTATGGTGGCTCATGTCTATAATCCCAGCACTTTGGGAGGTTGAGGTGGGAGGATTGCTTGAAC  
CCAAGAGGTCAAGGCTGCAGTGAGCCATGTTACACCGCTGCACTCAAGCTTGGGTGACAGAACAAGACC  
CCGTCTCAAAAAAAATTTTTTTTTTAATAAAACAAAATTTGTTTGAAATCTTTTAAAAATTCAAATGATT  
TTTACAAGTTTTAAATAAGCTCTCCCCAACTTGCTTTATGCCTTCTTATTGCTTTTATGATATATATAT  
GCTTGGCTAACTATATTTGCTTTTTGCTAACAAATGCTCTGGGGTCTTTTTATGCATTTGCATTTGCTCTT  
TCATCTCTGCTTGGATTATTTTAAATCATTAGGAATTAAGTTATCTTTAAATTTAAGTATCTTTTTTCA  
AAAACATTTTTTAATAGAATAAAATATAATTTGATCTTATTA

>NM\_002982.4 Homo sapiens C-C motif chemokine ligand 2 (CCL2), mRNA

GAGAGGCTGAGACTAACCCAGAAACATCCAATTCTCAAAGCTCGCACTCTCGCCTCCAGCATGAA  
AGTCTCTGCCGCCCTTCTGTGCCTGCTGCTCATAGCAGCCACCTTCATTCCCCAAGGGCTCGCTCAGCCA  
GATGCAATCAATGCCCCAGTCACCTGCTGTTATAACTTCACCAATAGGAAGATCTCAGTGCAGAGGCTCG  
CGAGCTATAGAAGAATCACCAGCAGCAAGTGTCCCAAAGAAGCTGTGATCTTCAAGACCATTGTGGCCAA  
GGAGATCTGTGCTGACCCCAAGCAGAAGTGGGTTTCAGGATTCCATGGACCACCTGGACAAGCAAACCCAA  
ACTCCGAAGACTTGAACACTCACTCCACAACCCAAAGAATCTGCAGCTAACTTATTTCCCTAGCTTTCC  
CCAGACACCCTGTTTTATTTTATTATAATGAATTTTGTGTTGATGTGAAACATTATGCCTTAAGTAAT  
GTTAATTCTTATTTAAGTTATTGATGTTTTAAGTTTATCTTTCATGGTACTAGTGTTTTTTAGATACAGA  
GACTTGGGGAAATTGCTTTTCCTCTTGAACCACAGTTCTACCCCTGGGATGTTTTGAGGGTCTTTGCAAG  
AATCATTAATACAAAGAATTTTTTTTAACATTCCAATGCATTGCTAAAATATTATTGTGGAAATGAATAT  
TTTGTAACCTATTACACCAAATAAATATATTTTTGTACAAAA

>NM\_001123041.3 Homo sapiens C-C motif chemokine receptor 2 (CCR2), transcript variant A, mRNA

AGATCTGTTTGGTTCAGTTGCTGAGAAGCCTGACATACCAGGACTGCCTGAGACAAGCCACAAGCTGAAC  
AGAGAAAGTGGATTGAACAAGGACGCATTTCCCAGTACATCCACAACATGCTGTCCACATCTCGTTCTC  
GGTTTATCAGAAATACCAACGAGAGCGGTGAAGAAGTCACCACCTTTTTTGATTATGATTACGGTGCTCC  
CTGTCATAAATTTGACGTGAAGCAAATTGGGGCCCAACTCCTGCCTCCGCTCTACTCGCTGGTGTTTCATC  
TTTGGTTTTGTGGGCAACATGCTGGTCGTCCTCATCTTAATAAACTGCAAAAAGCTGAAGTGCTTGACTG  
ACATTTACCTGCTCAACCTGGCCATCTCTGATCTGCTTTTTCTTATTACTCTCCATTGTGGGCTCACTC  
TGCTGCAAATGAGTGGGTCTTTGGGAATGCAATGTGCAAATTATTCACAGGGCTGTATCACATCGGTTAT  
TTTGGCGGAATCTTCTTCATCATCCTCCTGACAATCGATAGATACCTGGCTATTGTCCATGCTGTGTTTG  
CTTTAAAAGCCAGGACGGTCACCTTTGGGGTGGTGACAAGTGTGATCACCTGGTTGGTGGCTGTGTTTGC

TTCTGTCCCAGGAATCATCTTTACTAAATGCCAGAAAGAAGATTCTGTTTATGTCTGTGGCCCTTATTTT  
CCACGAGGATGGAATAATTTCCACACAATAATGAGGAACATTTTGGGGCTGGTCCTGCCGCTGCTCATCA  
TGGTCATCTGCTACTCGGGAATCCTGAAAACCCTGCTTCGGTGTCGAAACGAGAAGAAGAGGCATAGGGC  
AGTGAGAGTCATCTTCACCATCATGATTGTTTACTTTCTTCTGGACTIONCCTATAATATTGTCATTCTC  
CTGAACACCTTCCAGGAATTCTTCGGCCTGAGTAACTGTGAAAGCACCAGTCAACTGGACCAAGCCACGC  
AGGTGACAGAGACTCTTGGGATGACTCACTGCTGCATCAATCCCATCATCTATGCCTTCGTTGGGGAGAA  
GTTCAGAAGCCTTTTTACATAGCTCTTGGCTGTAGGATTGCCCCACTCCAAAACAGTGTGTGGAGGT  
CCAGGAGTGAGACCAGGAAAGAATGTGAAAGTGACTACACAAGGACTCCTCGATGGTCGTGAAAAAGGAA  
AGTCAATTGGCAGAGCCCCTGAAGCCAGTCTTCAGGACAAAGAAGGAGCCTAGAGACAGAAATGACAGAT  
CTCTGCTTTGGAAATCACACGTCTGGCTTCACAGATGTGTGATTACAGTGTGAATCTTGGTGTCTACGT  
TACCAGGCAGGAAGGCTGAGAGGAGAGAGACTCCAGCTGGGTTGAAAAACAGTATTTTCCAACTACCTT  
CCAGTTCCTCATTTTTGAATACAGGCATAGAGTTCAGACTTTTTTTAAATAGTAAAAATAAAATTAAAGC  
TGAAAACTGCAACTTGTAATGTGGTAAAGAGTTAGTTTGAGTTACTATCATGTCAAACGTGAAAATGCT  
GTATTAGTCACAGAGATAATTCTAGCTTTGAGCTTAAGAATTTTGAGCAGGTGGTATGTTTGGGAGACTG  
CTGAGTCAACCAATAGTTGTTGATTGGCAGGAGTTGGAAGTGTGTGATCTGTGGGCACATTAGCCTATG  
TGCATGCAGCATCTAAGTAATGATGTCGTTTGAATCACAGTATACGCTCCATCGCTGTCATCTCAGCTGG  
ATCTCCATTCTCTCAGGCTTGCTGCCAAAAGCCTTTTGTGTTTTGTTTGTATCATTATGAAGTCATGCG  
TTTAATCACATTCGAGTGTTTCAGTGCTTCGCAGATGTCCTTGATGCTCATATTGTTCCCTATTTTGCCA  
GTGGGAACTCCTAAATCAAGTTGGCTTCTAATCAAAGCTTTTAAACCCTATTGGTAAAGAATGGAAGGTG  
GAGAAGCTCCCTGAAGTAAGCAAAGACTTTCCTCTTAGTCGAGCCAAGTTAAGAATGTTCTTATGTTGCC  
CAGTGTGTTTCTGATCTGATGCAAGCAAGAAACACTGGGCTTCTAGAACCAGGCAACTTGGGAACTAGAC  
TCCAAGCTGGACTATGGCTCTACTTTCAGGCCACATGGCTAAAGAAGGTTTCAGAAAGAAGTGGGGACA  
GAGCAGAACTTTCACCTTCATATATTTGTATGATCCTAATGAATGCATAAAATGTTAAGTTGATGGTGAT  
GAAATGTAAATACTGTTTTTAACAACTATGATTTGGAAAAATAAATCAATGCTATAACTATGTTGATAAAA  
GATTTAAAAACAA

>NM\_172361.3 Homo sapiens CD46 molecule (CD46), transcript variant I, mRNA

GCGGCTCGGGCCACGCCACCTGTCCTGCAGCACTGGATGCTTTGTGAGTTGGGGATTGTTGCGTCCCAT  
ATCTGGACCCAGAAGGGACTTCCCTGCTCGGCTGGCTCTCGGTTTCTCTGCTTTCCTCCGGAGAAATAAC  
AGCGTCTTCCGCGCCGCGCATGGAGCCTCCCGGCCGCCGCGAGTGTCCCTTTCCTCCTGGCGCTTTCCT  
GGGTTGCTTCTGGCGGCCATGGTGTTGCTGCTGTACTCCTTCTCCGATGCCTGTGAGGAGCCACCAACAT  
TTGAAGCTATGGAGCTCATTGGTAAACCAAAACCCTACTATGAGATTGGTGAACGAGTAGATTATAAGTG  
TAAAAAAGGATACTTCTATATACCTCCTCTTGCCACCCATACTATTTGTGATCGGAATCATACATGGCTA  
CCTGTCTCAGATGACGCCTGTTATAGAGAAACATGTCCATATATACGGGATCCTTTAAATGGCCAAGCAG  
TCCCTGCAAATGGGACTTACGAGTTTGGTTATCAGATGCACCTTATTTGTAATGAGGGTTATTACTTAAT  
TGGTGAAGAAATTCTATATTGTGAACCTAAAGGATCAGTAGCAATTTGGAGCGGTAAGCCCCCAATATGT  
GAAAAGGTTTTGTGTACACCACCTCCAAAAATAAAAAATGGAAAACACACCTTTAGTGAAGTAGAAGTAT  
TTGAGTATCTTGATGCAGTAACTTATAGTTGTGATCCTGCACCTGGACCAGATCCATTTTCACTTATTGG  
AGAGAGCACGATTTATTGTGGTGACAATTCAGTGTGGAGTCGTGCTGCTCCAGAGTGTAAGTGGTCAAA  
TGTCGATTTCCAGTAGTCGAAAATGGAAAACAGATATCAGGATTTGGAAAAAATTTTACTACAAAGCAA  
CAGTTATGTTTGAATGCGATAAGGGTTTTTACCTCGATGGCAGCGACACAATTGTCTGTGACAGTAACAG  
TACTTGGGATCCCCCAGTTCCAAAGTGTCTTAAAGGATATCCTAAACCTGAGGAAGGAATACTTGACAGT  
TTGGATGTTTGGGTCATTGCTGTGATTGTTATTGCCATAGTTGTTGGAGTTGCAGTAATTTGTGTTGTCC  
CGTACAGATATCTTCAAAGGAGGAAGAAGAAAGGGAAAGCAGATGGTGGAGCTGAATATGCCACTTACCA  
GACTAAATCAACCACTCCAGCAGAGCAGAGAGGCTGAATAGATTCCACAACCTGGTTTGCCAGTTCATCT  
TTTGA CTCTATTA AAAATCTTCAATAGTTGTTATTCTGTAGTTTCACTCTCATGAGTGCAACTGTGGCTTA  
GCTAATATTGCAATGTGGCTTGAATGTAGGTAGCATCCTTTGATGCTTCTTTGAACTTGTATGAATTTG  
GGTATGAACAGATTGCCTGCTTCCCTTAAATAACACTTAGATTTATTGGACCAGTCAGCACAGCATGCC

TGGTTGTATTAAAGCAGGGATATGCTGTATTTTATAAAATTGGCAAAATTAGAGAAATATAGTTCACAAT  
GAAATTATATTTTCTTTGTAAAGAAAGTGGCTTGAAATCTTTTTTGTTCAAAGATTAATGCCAACTCTTA  
AGATTATTCTTTCACCAACTATAGAATGTATTTTATATATCGTTCATTGTAAAAAGCCCTTAAAAATATG  
TGTATACTACTTTGGCTCTTGTGCATAAAAACAAGAACACTGAAAATTGGGAATATGCACAACTTGGCT  
TCTTTAACCAAGAATATTATTGGAAAATTCTCTAAAAGTTAATAGGGTAAATTCTCTATTTTTTGTAAATG  
TGTTCCGGTGATTCAGAAAGCTAGAAAGTGTATGTGTGGCATTGTTTTCACTTTTAAAACATCCCTAA  
CTGATCGAATATATCAGTAATTTCAGAATCAGATGCATCCTTTCATAAGAAGTGAGAGGACTCTGACAGC  
CATAACAGGAGTGCCACTTCATGGTGCGAAGTGAACACTGTAGTCTTGTTGTTTTCCCAAAGAGAACTCC  
GTATGTTCTCTTAGGTTGAGTAACCCACTCTGAATTCTGGTTACATGTGTTTTCTCTCCCTCCTTAAAT  
AAAGAGAGGGGTAAACATGCCCTCTAAAAGTAGGTGGTTTTGAAGAGAATAAATTCATCAGATAACCTC  
AAGTCACATGAGAATCTTAGTCCATTACATTGCCTTGGCTAGTAAAAGCCATCTATGTATATGTCTTAC  
CTCATCTCCTAAAAGGCAGAGTACAAAGTAAGCCATGTATCTCAGGAAGGTAACCTTCATTTTGTCTATTT  
GCTGTTGATTGTACCAAGGGATGGAAGAAGTAAATATAGCTCAGGTAGCACTTTATACTCAGGCAGATCT  
CAGCCCTCTACTGAGTCCCTTAGCCAAGCAGTTTCTTTCAAAGAAGCCAGCAGGCGAAAAGCAGGGACTG  
CCACTGCATTTTCATATCACACTGTTAAAAGTTGTGTTTTGAAATTTTATGTTTAGTTGCACAAATTGGGC  
CAAAGAAACATTGCCTTGAGGAAGATATGATTGGAAAATCAAGAGTGTAGAAGAATAAATACTGTTTTAC  
TGTCCAAAGACATGTTTATAGTGCTCTGTAAATGTTCTTTCTTTGTAGTCTCTGGCAAGATGCTTTAG  
GAAGATAAAAGTTTGAGGAGAACAAACAGGAATTCTGAATTAAGCACAGAGTTGAAGTTTATACCCGTTT  
CACATGCTTTTCAAGAATGTCGCAATTACTAAGAAGCAGATAATGGTGTTTTTTAGAAACCTAATTGAAG  
TATATTCAACCAAATACTTTAATGTATAAAATAAATATTATACAATATACTTGTATAGCAGTTTCTGCTT  
CACATTTGATTTTTTCAAATTTAATATTTATATTAGAGATCTATATATGTATAAATATGTATTTTGTCAA  
ATTTGTTACTTAAATATATAGAGACCAGTTTTCTCTGGAAGTTTGTTTAAATGACAGAAGCGTATATGAA  
TTCAAGAAAATTTAAGCTGCAAAAATGTATTTGCTATAAAATGAGAAGTCTCACTGATAGAGGTTCTTTA  
TTGCTCATTTTTTAAAAATGGACTCTTGAAATCTGTTAAAATAAAATTGTACATTTGGA

>NM\_078467.3 Homo sapiens cyclin dependent kinase inhibitor 1A (CDKN1A), transcript variant 2, mRNA

ATGTTGAGCTCTGGCATAGAAGAGGCTGGTGGCTATTTTGTCTTGGGCTGCCTGTTTTAGCTGCTGCA  
ACCACAGGGATTTCTTCTGTTGAGGCGCCATGTCAGAACCGGCTGGGGATGTCCGTCAGAACCCATGCGG  
CAGCAAGGCTGCCGCCGCTCTTCGGCCCAGTGGACAGCGAGCAGCTGAGCCGCGACTGTGATGCGCTA  
ATGGCGGGCTGCATCCAGGAGGCCCGTGAGCGATGGAACCTCGACTTTGTACCGAGACACCACTGGAGG  
GTGACTTCGCCTGGGAGCGTGTGCGGGGCCTTGGCCTGCCAAGCTCTACCTTCCACGGGGCCCCGGCG  
AGGCCGGGATGAGTTGGGAGGAGGCAGGCGGCCTGGCACCTCACCTGCTCTGCTGCAGGGGACAGCAGAG  
GAAGACCATGTGGACCTGTCACTGTCTTGTACCCTTGTGCCTCGCTCAGGGGAGCAGGCTGAAGGGTCCC  
CAGGTGGACCTGGAGACTCTCAGGGTCGAAAACGGCGGCAGACCAGCATGACAGATTTCTACCACTCCAA  
ACGCCGGCTGATCTTCTCCAAGAGGAAGCCCTAATCCGCCACAGGAAGCCTGCAGTCCTGGAAGCGCGA  
GGGCCTCAAAGGCCCGCTCTACATCTTCTGCCTTAGTCTCAGTTTGTGTGTCTTAATTATTATTTGTGTT  
TTAATTTAAACACCTCCTCATGTACATACCCTGGCCGCCCCCTGCCCCCAGCCTCTGGCATTAGAATTA  
TTTAAACAAAACTAGGCGGTTGAATGAGAGGTTCTTAAGAGTGCTGGGCATTTTTATTTTATGAAATAC  
TATTTAAAGCCTCCTCATCCCGTGTCTCCTTTTCTCTCTCCCGAGGTTGGGTGGGCCGGCTTCATGC  
CAGCTACTTCCTCCTCCCCACTTGTCCGCTGGGTGGTACCCTCTGGAGGGGTGTGGCTCCTTCCCATCGC  
TGTCACAGGCGGTTATGAAATTCACCCCCTTTCCTGGACACTCAGACCTGAATTCTTTTTCATTTGAGAA  
GTAAACAGATGGCACTTTGAAGGGGCCTCACCGAGTGGGGGCATCATCAAAAACCTTTGGAGTCCCCTCAC  
CTCCTCTAAGGTTGGGCAGGGTGACCCTGAAGTGAGCACAGCCTAGGGCTGAGCTGGGGACCTGGTACCC  
TCCTGGCTCTTGATACCCCCTCTGTCTTGTGAAGGCAGGGGGAAGGTGGGGTCTGGAGCAGACCACCC  
CGCCTGCCCTCATGGCCCCTCTGACCTGCACTGGGAGCCCGTCTCAGTGTTGAGCCTTTTCCCTCTTG  
GCTCCCCTGTACCTTTTGAGGAGCCCCAGCTACCCTTTTCTCCAGCTGGGCTCTGCAATCCCCTCTGC  
TGCTGTCCCTCCCCCTTGTCTTTCCCTTCAGTACCCTCTCAGCTCCAGGTGGCTCTGAGGTGCCTGTCC

CACCCCCACCCCAGCTCAATGGACTGGAAGGGGAAGGGACACACAAGAAGAAGGGCACCCCTAGTTCTAC  
CTCAGGCAGCTCAAGCAGCGACCGCCCCCTCTCTAGCTGTGGGGGTGAGGGTCCCATGTGGTGGCACAG  
GCCCCCTTGAGTGGGGTTATCTCTGTGTTAGGGGTATATGATGGGGGAGTAGATCTTTCTAGGAGGGAGA  
CACTGGCCCCCTCAAATCGTCCAGCGACCTTCCTCATCCACCCCATCCCTCCCCAGTTCATTGCACTTTGA  
TTAGCAGCGGAACAAGGAGTCAGACATTTTAAGATGGTGGCAGTAGAGGCTATGGACAGGGCATGCCACG  
TGGGCTCATATGGGGCTGGGAGTAGTTGTCTTTCCTGGCACTAACGTTGAGCCCCTGGAGGCACTGAAGT  
GCTTAGTGTACTTGGAGTATTGGGGTCTGACCCCAAACACCTTCAGCTCCTGTAACATACTGGCCTGGA  
CTGTTTTCTCTCGGCTCCCCATGTGTCCTGGTTCGTTTCTCCACCTAGACTGTAAACCTCTCGAGGGC  
AGGGACCACACCCTGTACTGTTCTGTGTCTTTCACAGCTCCTCCCACAATGCTGAATATACAGCAGGTGC  
TCAATAAATGATTCTTAGTGACTTTA

>NM\_004064.5 Homo sapiens cyclin dependent kinase inhibitor 1B (CDKN1B), mRNA

CTTCTTCGTCAGCCTCCCTTCCACCGCCATATTGGGCCACTAAAAAAGGGGGCTCGTCTTTTCGGGGTG  
TTTTTCTCCCCCTCCCCTGTCCCCGCTTGCTCACGGCTCTGCGACTCCGACGCCGGCAAGGTTTGGAGAG  
CGGCTGGGTTCGCGGGACCCGCGGGCTTGACCCGCCAGACTCGGACGGGCTTTGCCACCCTCTCCGCT  
TGCCTGGTCCCCTCTCCTCTCCGCCCTCCCGCTCGCCAGTCCATTTGATCAGCGGAGACTCGGCGGCCGG  
GCCGGGGCTTCCCCGCAGCCCCTGCGCGCTCCTAGAGCTCGGGCCGTGGCTCGTCGGGGTCTGTGTCTTT  
TGGCTCCGAGGGCAGTCGCTGGGCTTCGAGAGGGGTTGGGGCTGCGTAGGGGCGCTTTGTTTTGTTGCG  
TTTTGTTTTTTTGAGAGTGCAGAGAGAGGCGGTCGTGCAGACCCGGGAGAAAGATGTCAAACGTGCGAGTG  
TCTAACGGGAGCCCTAGCCTGGAGCGGATGGACGCCAGGCAGGCGGAGCACCCAAGCCCTCGGCCTGCA  
GGAACCTCTTCGGCCCCGTGGACCACGAAGAGTTAACCCGGGACTTGGAGAAGCACTGCAGAGACATGGA  
AGAGGCGAGCCAGCGCAAGTGGAATTTGATTTTCAGAATCACAAACCCCTAGAGGGCAAGTACGAGTGG  
CAAGAGGTGGAGAAGGGCAGCTTGCCCGAGTTCTACTACAGACCCCCGCGGCCCCCAAGGTGCCTGCA

AGGTGCCGGCGCAGGAGAGCCAGGATGTCAGCGGGAGCCGCCCGGCGGCGCCTTTAATTGGGGCTCCGGC  
TAACTCTGAGGACACGCATTTGGTGGACCCAAAGACTGATCCGTCGGACAGCCAGACGGGGTTAGCGGAG  
CAATGCGCAGGAATAAGGAAGCGACCTGCAACCGACGATTCTTCTACTCAAAACAAAAGAGCCAACAGAA  
CAGAAGAAAATGTTTCAGACGGTTCGCCAAATGCCGGTTCTGTGGAGCAGACGCCCAAGAAGCCTGGCCT  
CAGAAGACGTCAAACGTAAACAGCTCGAATTAAGAATATGTTTCCTTGTTTATCAGATACATCACTGCTT  
GATGAAGCAAGGAAGATATACATGAAAATTTTAAAAATACATATCGCTGACTTCATGGAATGGACATCCT  
GTATAAGCACTGAAAAACAACAACAATAACACTAAAATTTAGGCACTCTTAAATGATCTGCCTCTAA  
AAGCGTTGGATGTAGCATTATGCAATTAGGTTTTTCCTTATTTGCTTCATTGTACTACCTGTGTATATAG  
TTTTTACCTTTTATGTAGCACATAAACTTTGGGGAAGGGAGGGCAGGGTGGGGCTGAGGAACTGACGTGG  
AGCGGGGTATGAAGAGCTTGCTTTGATTTACAGCAAGTAGATAAATATTTGACTTGCATGAAGAGAAGCA  
ATTTTGGGGAAGGGTTTGAATTGTTTTCTTTAAAGATGTAATGTCCCTTTCAGAGACAGCTGATACTTCA  
TTTAAAAAATCACAAAAATTTGAACACTGGCTAAAGATAATTGCTATTTATTTTACAAGAAGTTTATT  
CTCATTTGGGAGATCTGGTGATCTCCCAAGCTATCTAAAGTTTGTTAGATAGCTGCATGTGGCTTTTTTA  
AAAAAGCAACAGAAACCTATCCTCACTGCCCTCCCCAGTCTCTCTTAAAGTTGGAATTTACCAGTTAATT  
ACTCAGCAGAATGGTGATCACTCCAGGTAGTTTGGGGCAAAAATCCGAGGTGCTTGGGAGTTTTGAATGT  
TAAGAATTGACCATCTGCTTTTATTAAATTTGTTGACAAAATTTCTCATTTTCTTTTCACTTCGGGCTG  
TGTAACACAGTCAAATAATTCTAAATCCCTCGATATTTTTAAAGATCTGTAAGTAACTTCACATTAAA  
AAATGAAATATTTTTTAATTTAAAGCTTACTCTGTCCATTTATCCACAGGAAAGTGTTATTTTTCAAGGA  
AGGTTTCATGTAGAGAAAAGCACACTTGTAGGATAAGTGAAATGGATACTACATCTTTAAACAGTATTTCA  
TTGCCTGTGTATGGAAAAACCATTTGAAGTGACCTGTGTACATAACTCTGTAAAAACACTGAAAAATTA  
TACTAACTTATTTATGTTAAAAGATTTTTTTAATCTAGACAATATACAAGCCAAAGTGGCATGTTTTGT  
GCATTTGTAAATGCTGTGTTGGGTAGAAATAGGTTTTCCCTCTTTTGTTAAATAATATGGCTATGCTTAA  
AAGGTTGCATACTGAGCCAAGTATAATTTTTGTAAATGTGTGAAAAAGATGCCAATTATTGTTACACATT  
AAGTAATCAATAAAGAAAACCTCCATAGCTA

>NM\_000077.5 Homo sapiens cyclin dependent kinase inhibitor 2A (CDKN2A), transcript variant 1, mRNA

GAGAGCAGGCAGCGGGCGGCGGGGAGCAGCATGGAGCCGGCGGCGGGGAGCAGCATGGAGCCTTCGGCTG  
ACTGGCTGGCCACGGCCGCGGCCCGGGGTCTGGGTAGAGGAGGTGCGGGCGCTGCTGGAGGCGGGGGCGCT  
GCCCAACGCACCGAATAGTTACGGTCGGAGGCCGATCCAGGTCATGATGATGGGCAGCGCCCGAGTGGCG  
GAGCTGCTGCTGCTCCACGGCGCGGAGCCCAACTGCGCCGACCCCGCCACTCTACCCGACCCGTGCACG  
ACGCTGCCCCGGGAGGGCTTCTTGACACGCTGGTGGTGTGTCACCGGGCCGGGGCGCGGCTGGACGTGCG  
CGATGCCTGGGGCCGTCTGCCCCTGGACCTGGCTGAGGAGCTGGGCCATCGCGATGTCGCACGGTACCTG  
CGCGCGGCTGCGGGGGGCACCAGAGGCAGTAACCATGCCCCGATAGATGCCGCGGAAGGTCCCTCAGACA  
TCCCGATTGAAAGAACCAGAGAGGCTCTGAGAAACCTCGGGAACTTAGATCATCAGTCACCGAAGGTC  
CTACAGGGCCACAACCTGCCCCGCCACAACCCACCCGCTTTCGTAGTTTTTCATTTAGAAAATAGAGCTT  
TTAAAAATGTCCTGCCTTTTAACGTAGATATATGCCTTCCCCACTACCGTAAATGTCCATTTATATCAT  
TTTTTATATATTCTTATAAAAAATGTAAAAAAGAAAAACACCGCTTCTGCCTTTTCACTGTGTTGGAGTTT  
TCTGGAGTGAGCACTCACGCCCTAAGCGCACATTCATGTGGGCATTTCTTGCGAGCCTCGCAGCCTCCGG  
AAGCTGTCGACTTCATGACAAGCATTTTGTGAACTAGGGAAGCTCAGGGGGGTTACTGGCTTCTCTTGAG  
TCACACTGCTAGCAAATGGCAGAACCAAAGCTCAAATAAAAATAAAATAATTTTCATTCATTCACTCA

>NM\_003879.7 Homo sapiens CASP8 and FADD like apoptosis regulator (CFLAR), transcript variant 1, mRNA

ACACAAGCCATAGCAGGAAACAGCGAGCTTGACGCCTCACCGACGAGTCTCAACTAAAAGGGACTCCCGG  
AGCTAGGGGTGGGGACTCGGCCTCACACAGTGAGTGCCGGCTATTGGACTTTTGTCCAGTGACAGCTGAG  
ACAACAAGGACCACGGGAGGAGGTGTAGGAGAGAAGCGCCGCGAACAGCGATCGCCCAGCACCAAGTCCG

CTCCAGGCTTTCGGTTTCTTTCCTCCATCTTGGGTGCGCCTTCCCGCGTCTAGGGGAGCGAAGGCTG  
AGGTGGCAGCGGCAGGAGAGTCCGGCCGCGACAGGACGAACTCCCCACTGGAAAGGATTCTGAAAGAAA  
TGAAGTCAGCCCTCAGAAATGAAGTTGACTGCCTGCTGGCTTTCTGTTGACTGGCCCGGAGCTGTACTGC  
AAGACCCTTGTGAGCTTCCCTAGTCTAAGAGTAGGATGTCTGCTGAAGTCATCCATCAGGTTGAAGAAGC  
ACTTGATACAGATGAGAAGGAGATGCTGCTCTTTTTGTGCCGGGATGTTGCTATAGATGTGGTTCCACCT  
AATGTCAGGGACCTTCTGGATATTTTACGGGAAAGAGGTAAGCTGTCTGTCGGGGACTTGGCTGAACTGC  
TCTACAGAGTGAGGCGATTTGACCTGCTCAAACGTATCTTGAAGATGGACAGAAAAGCTGTGGAGACCCA  
CCTGCTCAGGAACCCTCACCTTGTTTCGGACTATAGAGTGCTGATGGCAGAGATTGGTGAGGATTTGGAT  
AAATCTGATGTGTCCTCATTAATTTTCTCATGAAGGATTACATGGGCCGAGGCAAGATAAGCAAGGAGA  
AGAGTTTCTTGGACCTTGTGGTTGAGTTGGAGAACTAAATCTGGTTGCCCCAGATCAACTGGATTTATT  
AGAAAAATGCCTAAAGAACATCCACAGAATAGACCTGAAGACAAAAATCCAGAAGTACAAGCAGTCTGTT  
CAAGGAGCAGGGACAAGTTACAGGAATGTTCTCCAAGCAGCAATCCAAAAGAGTCTCAAGGATCCTTCAA  
ATAACTTCAGGCTCCATAATGGGAGAAGTAAAGAACAAAGACTTAAGGAACAGCTTGGCGCTCAACAAGA  
ACCAGTGAAGAAATCCATTACAGGAATCAGAAGCTTTTTTGCCTCAGAGCATACCTGAAGAGAGATACAAG  
ATGAAGAGCAAGCCCCTAGGAATCTGCCTGATAATCGATTGCATTGGCAATGAGACAGAGCTTCTTCGAG  
ACACCTTCACTTCCCTGGGCTATGAAGTCCAGAAATTCTTGCATCTCAGTATGCATGGTATATCCCAGAT  
TCTTGGCCAATTTGCCTGTATGCCCCGAGCACCGAGACTACGACAGCTTGTGTGTGTCCTGGTGAGCCGA  
GGAGGCTCCCAGAGTGTGTATGGTGTGGATCAGACTCACTCAGGGCTCCCCCTGCATCACATCAGGAGGA  
TGTTTCATGGGAGATTCATGCCCTTATCTAGCAGGGAAGCCAAAGATGTTTTTTATTACAGAACTATGTGGT  
GTCAGAGGGCCAGCTGGAGGACAGCAGCCTCTTGGAGGTGGATGGGCCAGCGATGAAGAATGTGGAATTC  
AAGGCTCAGAAGCGAGGGCTGTGCACAGTTCACCGAGAAGCTGACTTCTTCTGGAGCCTGTGTACTGCGG  
ACATGTCCCTGCTGGAGCAGTCTCACAGCTCACCATCCCTGTACCTGCAGTGCCTCTCCAGAACTGAG  
ACAAGAAAGAAAACGCCCCACTCCTGGATCTTCACATTGAACTCAATGGCTACATGTATGATTGGAACAGC  
AGAGTTTCTGCCAAGGAGAAATATTATGTCTGGCTGCAGCACACTCTGAGAAAGAACTTATCCTCTCCT  
ACACATAAGAAACCAAAGGCTGGGCGTAGTGGCTCACACCTGTAATCCCAGCACTTTGGGAGGCCAAGG

AGGGCAGATCACTTCAGGTCAGGAGTTCGAGACCAGCCTGGCCAACATGGTAAACGCTGTCCCTAGTAAA  
AATACAAAAATTAGCTGGGTGTGGGTGTGGGTACCTGTATTCCCAGTTACTTGGGAGGCTGAGGTGGGAG  
GATCTTTTGAACCCAGGAGTTCAGGGTCATAGCATGCTGTGATTGTGCCTACGAATAGCCACTGCATACC  
AACCTGGGCAATATAGCAAGATCCCATCTCTTTAAAAAAAAAAAAAAAAAGGACAGGAACTATCTTACTCAA  
TGTATTAGTCATGTTTCTCTAGAGGGACAGAACTAATAGGATACATGTATATAAAAAGGGGAGTTTATTA  
AGGAGTATTGACTCACATGATCACAGGGTTAGGTCCCACAATAGGTCATCTGCAAGCAAGGAAGCCAATT  
CAAGTCCCAAAGCTGAAGAACTTGGAGTCCAATGTTTGAGGGCAGGAAGCATTGAGCATGAGAGAAAGAT  
GGAGGCCAGAAGACTACACCAGTCTAGTCTTTCCATGTTTTGCCTGCTTTTATTCTGGCAGTGCTGGCAG  
CTGATTAGATGGTGCCACCCAGATTGAGGATGGTCTGCCTTTCCCAGTCCACTGACTCAAATGTAAAT  
CTCCTTTGGCAGCACCCCTCACAGATGTACCCGGGAACACTTTGCATCCTTCTATTCAATCAAGTTGATAC  
TCAGTATTAACCATCACAGTCCATTTGGGCAACTATACCAAATTACCATAGACCAGGTGACTTAAACAGC  
AGTTATTTCTCACAGTTCGGGAGGCTGGGAAATCCAACATCTAAGTGGTAGCATATCTGGTGTCTGGTAA  
GGCATGCTTCCAGATCTTACCAGATGTCAGTCTTTTGATGTTCTCACATGGCAGAAAAAGAGGATGCAAA  
CTCTCAAGTATATCTTTAAGGGCACAAATTCATTCATGAGGGCTCTACCCTCATCACCTAATTACCTCC  
CAAAGGCCCCACCTTCTGATACTGTCACTTTGGGGATACTGTCTCCCCTTTGAATTCTGGGGGGAATACA  
AACATTCAGTTTGTAACAATAGCCTTATGATTTAGAGGTTACTTGTTCAATCACCTAGACCTCAAATTGC  
ATTTTACAGCTAGTCAAGTATATCTTTCTCTGATTTGATAGTGTGACCTAAAAGGGGACCATTGTTTGAA  
ATATCATTAGAGTTGCTTATTATTATTATTATTATTATTATTATTATTATTATTATTATTATTGAGACAG  
AGTTTCATTCTGCTGCCCAGGCTGGAGTGCAAGTGGCATCATCTTGGCTCATTGCAACCTCTGCCTTCTGG  
GTTCAAGCGATTCTCCTGCCTCAGCCTCCCGAGTAGCTGGGATTACAGGCTCCTGCCACCACACCCGGCT  
AATTTTGTATTTTATGAGGAGACAGGGTTTCCACCATGTTGGCCAGCGTGGTCTTGAACCTCTGACCTC  
AGGTGATTCACCAGCCTCGGCCTCCCAAAGTGCTGGGATTACAGGTGTGAGCCACTGCACCTGGCCTATT  
ATTATTTTAAATTTTTTTTTTTAATTGATCATTCTTGGGTGTTTCTCACAGAGGGTGATTTGGCAGGG  
TCACAGGACAATAGTGGAGGGAAGGTCAGCAGATAAACAAGTGAACAAAGGTCTCTGGTTTTCTAGGCA  
GAGGACCCTGCGCCTTCCGCAGTGTGTTGTGTCCTGGGTACTTGAGATTAGGGAGTGGTGATGACTCTT

AAGGAGCATGCTGCCTTCAAGCATCTGTTTAACAAAGCACATCTTGCACTGCCCTTAATCCATTTAACCC  
TGAGTGGACACAGCACATGTTTCAGAGAGCACAGGGTTGGGGGTAAGGTCATAGATCAACAGCATCCTAA  
GGCAGAAGAATTTTTCTTAGTACAGAACAAAATGAAGTCTCCCATGTCTACTTCTTTCTACACAGACACA  
GCAACAATCTGATTTCTCTATCTTTTCCCCACCTTTCCCCCTTTCTATTCCACAAAACCGCCATCGTCA  
TCATGGCCTGTTCTCAATGAGCTGTTGGGTACACCTCCCAGACGGGGTGGCGGTGGGCAGAGGGGCTCC  
TCACTTCCCAGATGGGGCGGCCAGGCGGACGCGCCCCCACCTCCCTCCCGACGGGATAGCTGGCCGGG  
CGGGGGCTGACCCCCACCTCCCTCCCCGACGGGGCGGCTGGCCGGGCGGGGGCTGACCCCCACGCCTCC  
CTCCCGACGGGGCGGCTGCCAGGCGGAGGGGCTCCTCACTTCTCAGACGGGGTGGCTGCTGGGCGGAGA  
CGCTCCTCACTTCCCAGACAGGGTGGCTGTCGGGCGGAGGGGCTCCTCACTTCTCAGACGGGGCAGCTGC  
GGGCGGAGGGGGCTCCTCACTTCTCAGACGGGGTGGCCGGGCAGAGAAGCTCCTCACATCCCAGACGGGGG  
GGCGGGGCAGAGGCGCTCCCCACATCTCAGACGATGGGCGGCCGGGCAGAGACGCTCCTCACTTCATCCC  
AGACGGGGTGGCGGCCGGGCAGAAGCTGTAATCTCGGCACCCTGGGGGGCCAAGGCAGGCGGCTGGGAGG  
CGGAGGCCGTAGCCAGCTGAGATCACACCACTGCACTCCAGCCTGGGCAACATTGAGCACTGAGTGGACG  
AGACTCTGCCCCGAATCCCGGCACCTCGGGAGGCCGAGGCTGGCAGATCACTCGCAGTCAGGAGCTGGAG  
ACCAGCCCGGCCAACACAGTGAAACCCTGTCTCCACCAAAAAAATACGAAAACCAGTCAGGCGTGGCGGC  
GCCCCGAATGGCAGGCACGCGGCAGGCCGAGGCGGGAGAATCAGGCAGGGAGGCTGCAGTGAGCCGAGAT  
GGCAGCAGTACAGTCCAGCTTCGGCTCGGCATCAGAGGGAGACCGTGGGGAGAGGGAGAAGAGAGGGAGG  
GGGAGAGGGCTATTTTTAAATTTTTTAAATTTGCTGAACAGGGGTACCTCTGGGCAGTGTGTCAGAATA  
CCACTTTTTAAATATTTTATGATTTATTTATTTTCTATTTCTTGAGGTTTTAACTGATGTGTATCTGTA  
TGTCTATTTGTGTATATTTTGTATGATCATGTAACAGAGTCTGAAAAGTGTGAAGAGACAGTTTTTCAG  
GAACAACAAGCAATTATTCCTACTTTCCAAGTTATTTTGATGCCATGGTGGCTCATACCTATAATCTGAG  
TACTTTGGGAGGCTGAGGTGGACTGATCACTTGAGCCCAGGAGTTTGAGACCAGCCTGGGCAACATAGCA  
AGACTCCATCTCTACAAAAAAGACAAAATTTAGCTGAGCGTGGTGGCGTGTTCTGTAGTCCCAGCTAC  
TTGGGAGGCTGAAGTGAGTGGATCCCCTGAGCCCAGAGAGGTCAAGGTTGTGATGAGCTGTGATCACACC  
ACTGCACTTCAGCATGGGAGACAGAGTGAGACCCTGTTTCAGAAAAAATAAATAAATAAAACCACCAGCA

[illegible]

AGAGACCAGAGAAAAGAAGACCACACATCTACAGCCATCTGATCATCGACAAACCTGACAAAAACAAGCAA  
TGGGGAAAAGATTCCCTATTTAATAAATGGTGCTGGGAAAACCTGGCTAGCCATATGCAGAAAATTGAAAC  
TGACCCCTTCCTTACACCTTATACAAAAATTAACCTCAAGATTAAAGACTTAATGTAAAACCTAAACTAT  
AAAAACCTAGAGAAGAAAATCTATTTAATACCATTCAAGACATAGGCACAAGCAAAGGTTTCATGACAAAA  
ACATCAAAAGCAATTGCAACAAAAGCAAAAATTACAAATGGGATCTAATTAACTAAAGAGCTCCTGCAC  
AGCAAAAGAACTATCATTAGAGTGAACAGGCAACCTACAGAATGGGAGAACATTTTTGCAATCTATCCA  
TCTGACAAAGGTCTAATATCCAGAACCTACAAGGACTTAAAACAAATTTACAAGGAAAAAACAACCCC  
ATCAAAAAGTGGACAAAGGACATGAACAGACACTTCTCAAAAGAAGACATTTATGTGGCCAACAAACATA  
TAAAAAAAAGCTCAACCTTACTGATCATTAGAGAAATGCAAAGGAGAACCAATGAGATACCATCTCAT  
GCCGGTCAGAATGGTGATTATTA AAAAGTCAAAAAACAACAGATGCTGGCGAGGCTGTGGAGAAGTAGGA  
ACACTTTTACATTGTTGGTGGGAATGTAAATTAGTTCAACCGTTGTGGAAGTGTGTGTGGCTATTCTCTCA  
AAGATCTAGAACTAGAAATACTATTTGTCCAGCAATCCCATTACTGGGTATATACCCAAAGGAATATAA  
ACCATTTTATTATAAAGATACATGCACATTTTTGTTCATTGCAGCACTCTTCACAATAGCAAAGACACAA  
TAGCAAATGCCCATCAAAGATAGACTGGATAAAGAAAATGTGGTACATATACCCATGGAATACTGTGCA  
GTGCAGCCATTACAGCTTTTGGTGATACAGTGAATCAGATTTTTTCATTAATTCTTTAATTGGTTATTAC  
TGAACGTGAAAAAGTAATGTTTGTATTGAAATCTTGAGTCTGGCCATGTTTCTATTTTAAATTCATAAAG  
AATTCTAACAAGAGGAATTCCAAGAATGTCATAAATGGATGTTTCTCCATGGATGAAGGAACTGTTTTAT  
TCACTTGCTGATAATTACAGCCTAATCCAGTTTGACATCATATAGATAAGTAGTTGAATTATGGATTTAAA  
ATACATATCATTTTCTAACTCCAAAGGTAATACTTATTTAAATGGTTTTGAAAATATAGAAAGGCACAAT  
TTCTTTTTAAATCTGTTATTCTCCACCACCACTCAATCTGTCTATCATCTATCTCTCCATTCACTCTCC  
ATTTGTTTATATCTGTTAATCTTTGTATGTGTTTCATGTATAGCTTTTACATGATTGGAATCATAATGCAT  
ATTCCATTTTGAAGTCTGCTTTTTTTTACACAAAAATATGTTGTGAATATTTTCCTATATTATGAAATAT  
CATTAGCTGAGCTTTTAGAATTGACTGCATGTTTTGGTACCATTTAGATATAGTTTAAGATACTTAGAAG  
TTATGTGGCTTTGCCACTATGGATGAATCTTATTTACTCAATATTAATTACTTACAAATAACCTCACCTA  
AACACTACTCAGCCATAAAAAGGAATGAATTAATGACATTCACAGCAACCTGGAGACTATTACTCTAAAG

GAAGTAACTGAGGAATGGAAAACCAAACATTGTATGTTCTCACTCATAAGTGGGAGATAAGCTATGAGGA  
TGCAAAGGCATAAGAAGGATACAATGGACTTTGGGGACTTAGGGGAAAGGGTGGGAGGGGGGTGAAGGAT  
AAAAGAATACAAATTGGGTTCACTGTATACTGCTCAGGTGATGGGTGCACCAGAATCTCACAAGTAACCA  
CTTAATTACTTACGCATGTAACCAGATACCACCTGTTCCCAAACACCTATGGAAATAATTTTGTTTTTT  
TTTTTAAAAAAGGAATGAGATCATGTCCTTTGCAGGGACATGGATGAAGCTGGAAGCCATTATCCTCAGC  
AAACTAACAGAGGAGCAGGAAACCAAACACCACATGTTCTCACTTGTAAGCGGAAGCTGAACAATGAGAA  
CACACGGACACAGGGATGAGATCAACACACACTGGGGCCTGATGCAGGGGCCGTAGCGGGGAGAGCATCA  
GGATAACTAGCTAATGCATGTGGGGCTTAATACCTAGGTGATAGGTTGATAGGTGCAGCAAACCACCATG  
GGACACGTTTACCTATGTAACAAACCCGCACATCCTGCACTTGATCCAGAACTTAAATATTTTAAAAA  
TCTTTAGAGAATACAAAAAAAAAAAAAAAAAGATTCTTCAATGCATACACAATAAAATTGCAGTTCAGTCAA  
ACATTGGAAGTCTTTCTCTGACTGTCTAGTTGGTATCTTCATTTTCAGCTTCTTCAAGATCCCACTCCAA  
ACACTGTTAGCTCAGCCAAATTGAACAGCTCATATCTCCTACCTCTGGATCTTTGGTTCTGGTGATTGTA  
TATTTCTGGACCATCTGGAACCCAGCATATCACCTACCCACATCTCCACATCCCCAAAATATAACCA  
TACTTCAAGGGCAGTTCAAATACCATCTCCTTCTATCCTCCATGAAGTCAGTTATCTCTTCCATTGGAAT  
TATCGCCCCCTCTCCTGAACAGTACTATTTCTGTGTGAATCTCCTCCAAGCCTTCTTTTCATTTTATATCT  
CATGCTGTAATTCTTGGAAAGTATGCTGTAGCTCAAGTGCAGAATTCTCATCAGTTTTATCTTTATATCT  
CTCCTAAACACTTTACCTGATGAAGAGCCTGGCATAACATAAAATATATATTGAATGAATCAGTGATGGA  
TTGAAAAGAGAAATGATGGATCTCCTAAATTTTAACTTTTATAAAATATTTTGATACATTCATGACCTTA  
CTTAGCAAGCAATGAACGTGATGTAACTATTGTTGATATAGTTTTTATATTGGAAGTGTAAGTAGTTT  
GTGGCATGGGATTGTGACATATCCTAGGTTTCCTCATCTTCTTTTTATTGAAATGTAATTCACAAGCCAT  
AAAATTTGCCCTTTAAAGTAAATGATGCAGTGGATTTTAGTATATTTACAGAGTTGTGCAATCATCACC  
ACTATCTAATTCCAGAACATTTCCATCTACCTAGAACTCCATACCAGTGAGCTGCCACTCTAATCCTCC  
TCTTCCCCCAGCCTCTAGAAACAATAATCCATTTTCTGTCTCTATGATTTGCCTGTTCTAGATATTTTAT  
AAAAATAAACATGTGGCCTTTCTGTCTGACTTCCTTCACTTAGCATGTTTCAAGGTTTCATCTATGCTAT  
AGAGTGTAACAGTGCTTCATTACATTTTATGGCTGAATAATACCCTATTGTGTGGATATACCGCATTTAG

TTTATTCATCAGTTGATCGAAATTTAGACTGTTTCCACTTTTTTGCTATTATGGATGATGCTGCTATGAA  
TATTCGTATATGAATTTTTATATGGATATATGTTTTAGTTCTTCTGGGCATATACCTTAGAAGTGAGAG  
TGCTCATCATATAGTAACTCTATGTTTAGCCTTTGAGGAACTGCCAACTGCTTTTCAAAGTAGTAGCA  
TCATTTTATATTCCCACCAGCAGTGTATGAGGTTTTTTTTATTTTTTGTGTTTTGAGACGGAGTCTCACT  
CTGTCGCCCAGGGTGGAGTGCAGTGGCGTTATCTTGATTCACTGTAACTCTGCCTTCTGGGTTC AAGCC  
ATTCTCCTGCCTCAGCCTCCCTAGTAGTTGGGAGTAGCTGGGTTTACAGGAGCTCGCCACCATGCCCAAC  
TAATTTTTGTATTGTTTTTGAGACGGAGTCTCGCTCTGTGGCCAGGCTGGAGTGCAGTGGTGCAATCT  
CAGCTCACTGCAAGCTCCGCCTCCTGGGTTCATGCCATTCTCCTGCCTCAGCCTCCCAAGTATCTGGGAC  
TACAGCCGCCCTCCACCACGCCCGGCTAATTTTTGTATTTTAGTAGAGACAGGGTTTCACCGTGTTAG  
CCAGGATGGTCTCTATCTCCTGACCTCGTGATCCGCCTGCCTTGGCCTCCCAAAGTGCTGGGATTACAGG  
CGTGAGCCACCGCGCCAGCCAATTTTTGTATTTTAGTAAAGACAGGGTTTCACCATGTTGGCCAGGCT  
GGTCTCGAACTCCTGGCCTCAGGTGATCTGACTGCCTTGGCTTCCCAAAGTGCTGGCATTACAGACATTA  
GCTACTGTGCCTGGCCTCAAGTCCTTCTCATTTTAAACTGCGTTATTTATTTTATTTTCTGAGATG  
GAATCTCACTCTGTGCCCCAGGTTGGAGTGCAGTGGTGCAATCTCGGCTCACTGCAACCTCCACCTCCTG  
AGTTCAAGCGACTCTCCTGCCTCGGCCTCCCTAGTAACTGGGATTACAGGCACCCACCATCACGCCTGGC  
TAATTTTTGTATTTTAGTAGAGACAGGGTTTCGCCATGTTGGCCAGGCTGGTCTTGAACCTCCTGAACCTC  
AGGTGATCTGCCTGCCTCGGCCTCCCAAATGCTAGGATTACAGGCGTGAGCCACCACACCCGGTGGGTT  
GTCTTTTATTGTTGAGTTGTAAGCATTCTTTTAAATATTCTGGATACTAGTTTCTTATCAGGTACAATC  
TTTGTGAATATATTCTCCATTCCATGGATTGTCTTCTCACTTCTGGATACTATACAGTACAAGTTTTA  
AATTTGATGAAGTTCATTGATTTCTGTTTTTATGTTATTGCTTATGCTTTTGGTGTCATACCTAAAA  
AACCATTGTCTAAATCAATTGCCTATGAGGTGTTACCCCTATGTTTTCTTCTAAAGTTTTATGATTTAG  
CTCTTTGACCCATTTGAGTTATTTTGTGTATGCAGTGCAGATAAGCATCCAGCCTCATTCTTTGCA  
CATAAATGTTCACTTGTCTTAGCATTACTTATTGAAAATACTATTTTTCCCTATAGAATTATTTTATAC  
TTATCACAAATCAACTAACTATAAGGGTTTATTTCTGGACTCAATTCTGTTGCTCTATCTTATGGTAGTA  
CCACACTGTCTTGATTATTGTAACCTCGTAGTAAGTTTTGGAATCCAGAAATGTAGTCCTCTAACTTTGT

TGTTGTTGTTGTTCTTCTTTTTCTTTGTAGAGATGAGGCCTTGCTATGTTGCCAGGCTGGTCTCAAA  
CTCCTGGCCTCAAACAATCCTCCCACCTCCACCTCCCAAAGTGCTGAGGGGTGAGCCACTGCAACTGGCC  
TGTTCTTTTTCAAATTGTTAGGGCTGTATTGGGTTTACCTTCCCTAAATTTTCATATAACTGTTAGGA  
TTCATTGCAAATTTATGTAAAAAGGCCTCTGGAATTTTGATAGTGATTACACTGAATGAGAGGAGTTT  
GGCAGGACTGGTTTCCAAGACCACAAGACCCTGTAAGACCCTGCTGATAAGACAGGATGTGGTAGAAAG  
GCCAACCCAAACCAGCCAAAACCATGATGGTGACAGAAGAGACCTCTGGTTACCTTTGCTGCCATTCTA  
TGGAATTATAATACATTAGCACGCTAAAAGAACTTCTACAGCACCATGATAGTTTACAACCTGCCATAG  
CAACTTTCAGAAGTTACCCTGTATGGTCTAAAAGGTCCAGACCTCCCCACTTCTTCTGGAAAACTCAT  
GAATAAGCCACCTCTGTTTAGCGTATAGTCAAGAAGCAACCATAAATATAGCCAGTCAGCAGCCCATCA  
GGGCTACTCTTCCTATGGGGTAGCCATTCTTTATTCCTTTACTTTCTTAATGAACTTGCTTTCACTTTA  
TTCTGTCAGCATGCTCTTGAATTCTTTCCTGAACCCACTTGACCTCTTGGGCTGAGCCTTAACCTTGGGG  
TACTTTTGCCTATAACAAACATACAAAGATAAGTTTGGCTGGGCGCAGTGGCTCATGCCTGTAATCCCAG  
GACTTTGGGAGGCTGAGGATGGTGGATCGCTTGAGCCAAGGAATTTGAGGCCACCTTGGGCAACACGGCA  
AAACCCTGTCTCTACTAAAAATACAAAAATTAGCTGGGTATGGTAGCATGCGCCTGTAGTACCAGCTACT  
CGGAAGGCTGAGGTGGGAGGATCACTTGAGCCCGGGAGGTGGAGGTTTCAGTGAGCTGAGATTGTGCCAC  
TGTA CTCCAGCCTGGGGAACAGAGTGAGACCCTGTCTCAAAATAAAAAATAAATTTGAGGTGTATTGCCAT  
CTTAACGGAAGTTGTTACTGGTGGACGGTATCCAAGTTACTGGTGGTAAATCTGCAGCAACCTCAATTCT  
TTCCTCCTCAGAAGAAAAGAATTTGACTGAGGGGCATAAGGCAGAAGGAGGGACCGAGGCAAGTTTCAGAG  
CAACAGTGAAAGTTTATTACGCTTTAGGCTGGGCACAGTGGCTCATGCCTGTAATCCCAGCATTTTGGGA  
GGCTGAGGCAGGTGGATTACTTGAGGTCAGTAGTTCGAGACCAGCCTGGCCATCATGATGATGAAACCTC  
GTCTCTACTAAAAATAGAAAAATCAGCTGGGCATGGTGGTCCATGCCTCTAATCCCAGCTACTCGGGAGG  
CTGAGGCAGGCGAATCAGTTGAACCTGGGAGGCGGAGGTTGCAGTGAGCCAAGAAAGTTTATTAAGCTTT  
AGAACAGTAAGGAAAGGAAAGAAAAGAAGGAAAGTATAACTTGGAAGAGGGCCAAGCAGGTGACCTGAGA  
AACCAGGTGCAGGGCTTGCCCTCTTGA CTTGGGGTTTTATATGCTGGCATACTCCGGGATCTTGTGTTA  
CTTTTCCCCACTCCTGAGATCTTTTGTAGAAGCTGATGATCAGTCTCAGGTGTTTTCTATTGCGGGGGGG

GGGGGCGGGCGGGGAGCTGCCTGTCCCTGGCACCACCTGTGACCAATTATTACTTTACAGAAACATTTA  
ACAACCGCCTGACCATCACCTGATGGTTGCCCAACACTCTTGGTGTGTGTCGGGGGAGCCCTCTCCTGCC  
TTGCTCAGACCTGAATGTACCCATTGTAACAAACCCCTTCTTTGTATACTTTGATATGGTGACATTTCTT  
GTCACCTGCCTCATTGTGAATTTTTATAGATGTGGCTAAGTCATATGCTTCCTTCTGAAAAATTATGTCA  
AATACTAGCAGTTTCTCACTGTTTTTTGCCCTAGAAACAACAACTAACCTTGAAGTGAAAGGCCTTTCT  
GCGTTTATCTTACCTTTTTTGAGCAGCATTAAAACTGTTTACTCAGACCAA

>NM\_014043.4 Homo sapiens charged multivesicular body protein 2B (CHMP2B), transcript variant 1,  
mRNA

GTTAGTCCCGGTCACCTGAGCTCCGGGTGACGCGGCTGCGGTAGCTGCGGATACAAGCCTTCCGCGGGT  
CCTGCCTGGCGACCCCGACCTCCTCCTGCTGTCTCTCCGCTCCGCCACCCCGAACCCGCCAAGGTCCTGT  
CCTTTTCTCCTGTCTTTGCCAGCGTTGGGCCGGACCGGGCCGAGCCGGGCGCCCGGGGCGCAGTCTTT  
AACCATGGCGTCCCTCTTCAAGAAGAAAACCGTGGATGATGTAATAAAGGAACAGAATCGAGAGTTACGA  
GGTACACAGAGGGCTATAATCAGAGATCGAGCAGCTTTAGAGAAACAAGAAAAACAGCTGGAATTAGAAA  
TTAAGAAAATGGCCAAGATTGGTAATAAGGAAGCTTGCAAAGTTTTAGCCAAACAACCTTGTGCATCTACG  
GAAACAGAAGACGAGAACTTTTGCTGTAAGTTCAAAAGTTACTTCTATGTCTACACAAACAAAAGTGATG  
AATCCCAAATGAAGATGGCTGGAGCAATGTCTACTACAGCAAAAACAATGCAGGCAGTTAACAAGAAGA  
TGGATCCACAAAAGACATTACAAACAATGCAGAATTTCCAGAAGGAAAACATGAAAATGGAAATGACTGA  
AGAAATGATCAATGATACACTTGATGACATCTTTGACGGTTCTGATGACGAAGAAGAAAGCCAGGATATT  
GTGAATCAAGTTCTTGATGAAATTGGAATTGAAATTTCTGGAAAGATGGCCAAAGCTCCATCAGCTGCTC  
GAAGCTTACCATCTGCCTCTACTTCAAAGGCTACAATCTCAGATGAAGAGATTGAACGGCAACTCAAGGC  
TTTAGGAGTAGATTAGTCAAAAGAAGTCATACTATTTTGCTTACTTATAATTATGTAGTATAAACCAAGC  
ACAGTGCAAGTTTCTTTTACAAAACACATGTATTTTGCAAAAAAAAAAAAAATGAAGACCATGAGTGAAC  
AGTTGTTTCCTAACCCATGGCTATTTAGAATCTTTTGCCAAAGAATGACAATGATGCAAAAATGGGAACA  
GTTTGGATTTTAATTAGAACTGTTTAGGAGTGATGATGTGTAAAAAGTTGACTTCTCTTTTGCATGGCAC

AGAGAAATTATATTCCTTACTTCATGTCAGTTTATGTTCTAAATCTTTTCACTGAATATAAAAAATCTTG  
TTAAATGCCATTAGGCACCAACTTAAAGAGGGTTGTA AAAATATTA AAAAGTATATCGTTAATTCTGTATC  
TGTTGCTTGCTTTTGTAAGTGATTATGTGTTATGACCATAGGTGGTTACAGCTGCCAAATTATTTTAA  
ATGGTCAAAAAGAAGAGTGCTATTTAAACATCTGTCTTAAACAAAACTGTCATAACTTTTCTTTTCT  
TTTTCCATTAGGAGAACATTCTAGTTGGTAAATTTCAAATGTGCTTGACACCTGCCTTAAATAGCACAG  
ACCTATTGTGCACATCTTTAAATTATTCAGCTGGCAGAAAAGAATTACATTTAAACTGAAATCAAGGC  
CTCAATACAAAGATTATCCTGGCTCTTTTCTATCTCTGTGGGCCTAATTGAAATATGTACTCTTATTTA  
GACACGCCTCTGTTAAACAGACCAGTTTTCTGGTCTCAGACCTATGATGACTTGTCCTTTGATGTC  
ACTACTGTGAATTGAATATAATTAGTAAAAATAGACGATGAATAAATAACACTTTATAGTAAGAAAACAA  
TATATTTTGGCCATCTAAAAATGAGAATTATAATTATATGAATTATAATTTAACTGTTTAATTTTGTTT  
AATGTGTATATTGAATCTTCAAATTGAAGCCATTATTCTCAATTAAGTACTACAACTATGACAATGCTT  
GACCTACATTTCTAAAAATAAAATTCACATTTTTTGATAAATAAACTACAGTTTTACCAGAAATTACTAT  
CTAAATGTGTATTAGCAGTATTTTTTAAGGTGAAATTGCCTTGGTATCTAATGAATGTGTAGACAGGGAG  
ATAAAATGAAGGATTGCCAGACTAGTTAGAATAGAATTTAGGATTAGGTTAGTTTTGAAAAATGATGTTG  
TAATATATGGGTTCTAACACATCCTACCATAAAAACTGGAGGAGATATGTGTAACCTGGTTAATTTGGGA  
TGGTGGACATTTTGGGCTAATACTGACAAAATACATCTTAGGACTAGTATACATGTGACACGGATTGCTA  
GGAGGAATGAAAAACTAACTGTATAGTTTATATTCCGTAAACCATTTTATAATGTTCAAAGATTAGGTT  
TTGTTATTGATAGTATTAAATACACAGTTTCTCTTAACAGTGATGGGTGAAAACATTTTACCGGATTATG  
GAATGTTTACCAGAACATGTTTTGATTCTTGAATGTACATAATAATGCCATCTAACTATTTACGTTCTT  
GTTTACATGTGGGAGCTTTTGTTTTCAAAAATTATTTGTAAAAAATCTCAATAAAGATTATATTATGT  
TGTTCTTTTCTTACCTTTTTTGCTTTTTTGGTTCCTGCTAAAATTA AAAATTTTATGCATATTTGGTAA

>NM\_176812.5 Homo sapiens charged multivesicular body protein 4B (CHMP4B), mRNA

GGAGAGGCCTGCGGCGGCAGGGAGCGGCGGGACTGGGAGCGGGCGCCGGAGCCGACCCGAGCCGAGCCGA  
GCCGAGCCGAGCCGGAGCGGGCGGCGAAGGCCGGCGCGGCGAGCAGCAACCATGTCGGTGTTGCGGAAGC  
TGTTGCGGGCTGGAGGGGGTAAGGCCGGCAAGGGCGGCCCCGACCCCCAGGAGGCCATCCAGCGGCTGCG  
GGACACGGAAGAGATGTTAAGCAAGAAACAGGAGTTCCTGGAGAAGAAAATCGAGCAGGAGCTGACGGCC  
GCCAAGAAGCACGGCACCAAAAAACAAGCGCGCGGCCCTCCAGGCACTGAAGCGTAAGAAGAGGTATGAGA  
AGCAGCTGGCGCAGATCGACGGCACATTATCAACCATCGAGTTCAGCGGGAGGCCCTGGAGAATGCCAA  
CACCAACACCGAGGTGCTCAAGAACATGGGCTATGCCGCCAAGGCCATGAAGGCGGCCCATGACAACATG  
GACATCGATAAAGTTGATGAGTTAATGCAGGACATTGCTGACCAGCAAGAACTTGCAGAGGAGATTTCAA  
CAGCAATTCGAAACCTGTAGGGTTTGGAGAAGAGTTTGACGAGGATGAGCTCATGGCGGAATTAGAAGA  
ACTAGAACAGGAGGAACTAGACAAGAATTTGCTGGAAATCAGTGGACCCGAAACAGTCCCTCTACCAAAT  
GTTCCCTCTATAGCCCTACCATCAAAACCCGCCAAGAAGAAAGAAGAGGAGGACGACGACATGAAGGAAT  
TGGAGAACTGGGCTGGATCCATGTAATGGGGTCCAGCGCTGGCTGGGCCCAGACAGACTGTGGTGGCCTG  
CGCAGCGAGCAGGCGTGTGCGTGTGTGGGGCAGGCAGGATGTGGTGCAGGCAGGTTCCATCGCTTTCGAC  
TCTCACTCCAAAGCAGTAGGGCCGCGTTGCTGCTCACTCTCTGCATAGCATGGTCTGCACCTGGGAGATG  
GGCGGGGGGAGGGGGGCGGGCGGGGTGGGAAGTGCCTGCTGTTTATAATGTTGAATTTCTGTAAATAAA  
CTGTATTTGCAATCCAACATTGAGCTTCTGGACTACGCTGACTCCACTGCTGAATCCTCAATGGAAAGG  
GTCGACTGGTTGCAGTTGAAATGACCTGAAATGTAGCCTCTGTCCTTGTAAGTCAGTTGACTTGCCGCAC  
ATCTCTTTGTGTACTTGTACGGTACTGGCAGAAAAGTCATTTTTCAAAGCCATAGGCTTTTCCTTGCCC  
TTAGCTGTAATAATGCATCTGATTTTGATTTCTCCAGAGCTGTGTTTCTGTCCATCACCTGTGTATTGG  
CCCTGTGTTTACCACTCTGGCCCACTCCTCACCCCTTGCTCCCCTGGTCTTCTGGAGTTTGTGACATTG  
ATTTGAAATGGATGGTGTCTCTTGAGAGCAAGTGAGATTGTTAGAATTAAGTTCCAACATAACAGTTTT  
CTAACATAGCTATAAGGTCCTTGTTGCTGTTTGTGATAACTGATAGATAACTCATTGGAAACGTGCATAC  
ATTTATATTCAGATGAAATTATGGTTTGCAGTGTCTATTAAATATCTCGATTAATTTTCATA

>NM\_000086.2 Homo sapiens CLN3 lysosomal/endosomal transmembrane protein, battenin (CLN3), transcript variant 2, mRNA

GTGCTGTACGTGATCCGACAAACGGCCTCTGCATAGTGCAGAACATTCTGCTGCTCTTAAAGGTACAGG  
CCTCAGGGTCCCTGCTGTAGACGGGGCGGGGAGAGTACGATGGGTGGGGCGTGGTGGGTCGTAGGGCGC  
TCGAGATGGAGCCCCCAGCTTCCTTGATGGATCGCGGGGCGCGAGTGCCCTAGACAAGCCGGAGCTGGGA  
CCGGCAATCGGGCGTTGATCCTTGTCACCTGTCGCAGACCCTCATCCCTCCCGTGGGAGCCCCCTTTGGA  
CACTCTATGACCCTGGACCCTCGGGGGACCTGAACTTGATGCGATGGGAGGCTGTGCAGGCTCGCGGCGG  
CGCTTTTCGATTCCGAGGGGGAGGAGACCGTCCCGGAGCCCCGGCTCCCTCTGTTGGACCATCAGGGCG  
CGCATTGGAAGAACGCGGTGGGCTTCTGGCTGCTGGGCCTTTGCAACAACTTCTCTTATGTGGTGATGCT  
GAGTGCCGCCACGACATCCTTAGCCACAAGAGGACATCGGGAAACCAGAGCCATGTGGACCCAGGCCCCA  
ACGCCGATCCCCACAACAGCTCATCACGATTTGACTGCAACTCTGTCTCTACGGCTGCTGTGCTCCTGG  
CGGACATCCTCCCCCACTCGTCATCAAATTGTTGGCTCCTCTTGGCCTTACCTGCTGCCCTACAGCCC  
CCGGGTTCTCGTCAGTGGGATTTGTGCTGCTGGAAGCTTCGTCTGGTTGCCTTTTCTATTCTGTGGGG  
ACCAGCCTGTGTGGTGTGGTCTTCGCTAGCATCTCATCAGGCCTTGGGGAGGTCACCTTCCTCTCCCTCA  
CTGCCTTCTACCCAGGGCCGTGATCTCCTGGTGGTCCTCAGGGACTGGGGGAGCTGGGCTGCTGGGGGC  
CCTGTCCTACCTGGGCCTACCCAGGCCGGCCTCTCCCTCAGCAGACCCTGCTGTCCATGCTGGGTATC  
CCTGCCCTGCTGCTGGCCAGCTATTTCTTGTTGCTCACATCTCCTGAGGCCAGGACCCTGGAGGGGAAG  
AAGAAGCAGAGAGCGCAGCCCGGCAGCCCCTATAAGAACCGAGGCCCGGAGTCGAAGCCAGGCTCCAG  
CTCCAGCCTCTCCCTTCGGGAAAGGTGGACAGTGTTCAAGGGTCTGCTGTGGTACATTGTTCCCTTGCTC  
GTAGTTTACTTTGCCGAGTATTTATTAACCAGGGACTTTTTGAACTCCTCTTTTCTGGAACACTTCCC  
TGAGTCACGCTCAGCAATACCGCTGGTACCAGATGCTGTACCAGGCTGGCGTCTTTCCTCCCGCTCTTC  
TCTCCGCTGCTGTCGCATCCGTTTCACCTGGGCCCTGGCCCTGCTGCAGTGCCTCAACCTGGTGTTCTG  
CTGGCAGACGTGTGGTTCGGCTTTCTGCCAAGCATCTACCTCGTCTTCTGATCATTCTGTATGAGGGGC  
TCCTGGGAGGCGCAGCCTACGTGAACACCTTCACAACATCGCCCTGGAGACCAGTGATGAGCACCGGGA  
GTTTGCAATGGCGGCCACCTGCATCTCTGACAACTGGGGATCTCCCTGTCGGGGCTCCTGGCTTTGCCT

CTGCATGACTTCCTCTGCCAGCTCTCCTGATACTCGGGATCCTCAGGACGCAGGTCACATTCACCTGTGG  
GCAGAGGGACAGGTCAGACACCCAGGCCACCCAGAGACCCTCCATGAACTGTGCTCCAGCCTTCCCG  
GCAGGTCTGGGAGTAGGGAAGGGCTGAAGCCTTGTTTCCCTGCAGGGGGGCCAGCCATTGTCTCCCACT  
TGGGGAGTTTCTCCTGGCATCATGCCTTCTGAATAAATGCCGATTTTATCCATGGAAA

>NM\_147780.4 Homo sapiens cathepsin B (CTSB), transcript variant 2, mRNA

GGCTGCAGGGCTCCGGCAACCGCTCCGGCAACGCCAACCGCTCCGCTGCGCGCAGGCTGGGCTGCAGGCT  
CTCGGCTGCAGCGCTGGGCTGGTGTGCAGTGGTGCGACCACGGCTCACGGCAGCCTCAGCCACCCAGATG  
TAAGCGATCTGGTTCCACCTCAGCCTCCCGAGTAGTGTCTTCAGGCCTATGGAGAGCAGCTTGCCTGGG  
CTGGGCCTGCAGTACCTGGTTTGCATAGATGATTGGCAGGTGGATCTAGGATCCGGCTTCCAACATGTGG  
CAGCTCTGGGCCTCCCTCTGCTGCCTGCTGGTGTGGCCAATGCCCGGAGCAGGCCCTCTTCCATCCCC  
TGTCGGATGAGCTGGTCAACTATGTCAACAAACGGAATACCACGTGGCAGGCCGGGCACAACCTTCTACAA  
CGTGGACATGAGCTACTTGAAGAGGCTATGTGGTACCTTCTGGGTGGGCCCAAGCCACCCAGAGAGTT  
ATGTTTACCGAGGACCTGAAGCTGCCTGCAAGCTTCGATGCACGGGAACAATGGCCACAGTGTCCACCA  
TCAAAGAGATCAGAGACCAGGGCTCCTGTGGCTCCTGCTGGGCCTTCGGGGCTGTGGAAGCCATCTCTGA  
CCGGATCTGCATCCACACCAATGCGCACGTGAGCGTGGAGGTGTCGGCGGAGGACCTGCTCACATGCTGT  
GGCAGCATGTGTGGGGACGGCTGTAATGGTGGCTATCCTGCTGAAGCTTGGAACTTCTGGACAAGAAAAG  
GCCTGGTTTCTGGTGGCCTCTATGAATCCCATGTAGGGTGCAGACCGTACTCCATCCCTCCCTGTGAGCA  
CCACGTCAACGGCTCCCGGCCCCCATGCACGGGGGAGGGAGATACCCCAAGTGTAGCAAGATCTGTGAG  
CCTGGCTACAGCCCGACCTACAAACAGGACAAGCACTACGGATACAATTCTACAGCGTCTCCAATAGCG  
AGAAGGACATCATGGCCGAGATCTACAAAAACGGCCCCGTGGAGGGAGCTTTCTCTGTGTATTCGGACTT  
CCTGCTCTACAAGTCAGGAGTGTACCAACACGTCACCGGAGAGATGATGGGTGGCCATGCCATCCGCATC  
CTGGGCTGGGGAGTGGAGAATGGCACACCCTACTGGCTGGTTGCCAACTCCTGGAACACTGACTGGGGTG

ACAATGGCTTCTTTAAAATACTCAGAGGACAGGATCACTGTGGAATCGAATCAGAAGTGGTGGCTGGAAT  
TCCACGCACCGATCAGTACTGGGAAAAGATCTAATCTGCCGTGGGCCTGTCGTGCCAGTCCTGGGGGCGA  
GATCGGGGTAGAAATGCATTTTATTCTTTAAGTTCACGTAAGATACAAGTTTCAGACAGGGTCTGAAGGA  
CTGGATTGGCCAAACATCAGACCTGTCTTCCAAGGAGACCAAGTCCTGGCTACATCCCAGCCTGTGGTTA  
CAGTGCAGACAGGCCATGTGAGCCACCGCTGCCAGCACAGAGCGTCCTTCCCCCTGTAGACTAGTGCCGT  
AGGGAGTACCTGCTGCCCCAGCTGACTGTGGCCCCCTCCGTGATCCATCCATCTCCAGGGAGCAAGACAG  
AGACGCAGGAATGGAAAGCGGAGTTCCTAACAGGATGAAAGTTCCCCATCAGTTCCCCAGTACCTCCA  
AGCAAGTAGCTTTCCACATTTGTACAGAAATCAGAGGAGAGACGGTGTTGGGAGCCCTTTGGAGAACGC  
CAGTCTCCCAGGCCCCCTGCATCTATCGAGTTTGCAATGTCACAACCTCTCTGATCTTGTGCTCAGCATG  
ATTCTTTAATAGAAGTTTTATTTTTTCGTGCACTCTGCTAATCATGTGGGTGAGCCAGTGGAACAGCGGG  
AGACCTGTGCTAGTTTTACAGATTGCCTCCTTATGACGCGGCTCAAAAGGAAACCAAGTGGTCAGGAGTT  
GTTTCTGACCCACTGATCTCTACTACCACAAGGAAAATAGTTTAGGAGAAACCAGCTTTTACTGTTTTTG  
AAAAATTACAGCTTCACCCTGTCAAGTTAACAAGGAATGCCTGTGCCAATAAAAGTTTTCTCCAATTGA  
AGTCTACTCTGATGGGATCTCAGATCCTTTGTCACTGCCTATAGACTTGTAGCTGCTGTCTCTTTGTC  
CCTGCAGAGAATCACGTCCTGGAAGTGCATGTTCTTGCGACTCTTGGGACTTCATCTTAAGTCTCGCTG  
CCCCAGCCATGTTTTCAACCATGGCATCCCTCCCCCAATTAGTTCCTGTCATCCTCGTCAACCTTCTCT  
GTAAGTGCCTGGTAAGCTTGCCCTTGCTTAAGAACTCAAACATAGCTGTGCTCTATTTTTTTGTTGTTG  
TTGTGACTGACAGAGTGAGATTCCGTCTCCAGGCTGGAGTGCAGTGGCGCCTTCTCAGCTCACTGCAAC  
CTGCAGCCTCCTAGATTCAAGCGATTCTCCTGCTTCAGCCTTCCGAGTAGCTGGGATGACAGGCACTCAC  
CAATATGCCTGGGTAATTTTTGTATTTTTAAGTACATACAGGATTTACCATGTTGGCCAGGCTAGTTTC  
AAACTCCCGGCCTCAGGTGGTCTGCCTGCCTCAGCCTCCCAAAGTGTTGGGATTACAGGCGTGAGCCACT  
GGGCCCTGCCTGTATTTTTATCAGCCACAAATCCAGCAACAAGCTGAGGATTCAGCTCATAAAACAGGC  
TTGGTGTCTTGGTGATCTCACATAACCAAGATGCTACCCCGTGGGGAACCACATCCCCCTGGATGCCCTC  
CAGCCTTGTTTTGGGCTGGAGTCAGGGCCTGTATACAGTATTTTGAATTTGTATGCCACTGGTTTGCATT  
GCTGGTCAGGAACTCTAGTGCTTTGCATAGCCCTGGTTTAGAAACATGTTATAGCAGTTCTTGGTATAGA

GCAAAC TAGAAGA ACCAGCAATCATTCCACTGTCCTGCCAAGGTACACCTCAGTACTCCCCTTCCCAACT  
GAAGTGGTATGAGGCTAGCTCTTTCCAAAAGCATTCAAGTTTGGCTTCTGATGTGACTCAGAATTTAGGA  
ACCAGATGCTAGATCAAATAAGCTCTGAAAATCTGAGGAACATTGTAGGAAAGGTTTGTTAAGCATCTCT  
TAAGTGCCATGATGAGCATAACAGCCGGCCGTCGTGGCTCACGCCTGTAATCCCAGCACTTTGGGAGGCC  
AAGGTGGGAGGATGACAAGGTCAGGAGTTCAAGACCAGCCTGGCCAACATGCTGAAACCTCACCTCTACT  
AAAAATACAAAATTAGCTGGGCATGGTGGCACATGCCTGTAATCCCAGCTACTTGGGAGGCTGAGGCAG  
GAGAATCGCTTGAACCCGGGAGGCGGAGGTTGCAGTGAGCCAAGACAGTGCCAGTGCACTCCAGCCTCGG  
TGACAGCGCAAGGCTCCGTCTCAATAATTAAGGCGGGCGCAGTGGCTC  
AAGCCTGTAATCCCAGCACTTTGGGAGGCTGAGGCGGGCAGATCACCTGAGGTCAGGAGTTTTGAGATCA  
GCCTTGGCAACACGGTGAAACCCCATCTCTACTAAAAATACAAAATTAGCCAAGCATGCTGGCACATGCC  
TGTAATCCCAGCTACTCGGGAGGCTGAGGTACGAGAATCGCTTGAACCTGGGAGGCAGAGGATGCAGTGA  
GCCGAGATCACGCCATTGCACTCCAGCCTGGGGGACAAGAGTGAATCTGTGTCTACCAAAAAAAAAAAG  
AAAAAGAAAGATGCTTAACAAAGGTTACCATAAGCCACAAATTCATAACCACTTATCCTTCCAGTTTCAA  
GTAGAATATATTCATAACCTCAATAAAGTTCTCCCTGCTCCCAA

>NM\_001909.5 Homo sapiens cathepsin D (CTSD), mRNA

AACTGCGGGCGTCATCCCGGCTATAAGCGCACGGCCTCGGCGACCCTCTCCGACCCGGCCGCCGCCCAT  
GCAGCCCTCCAGCCTTCTGCCGCTCGCCCTCTGCCTGCTGGCTGCACCCGCCTCCGCGCTCGTCAGGATC  
CCGCTGCACAAGTTCACGTCCATCCGCCGGACCATGTCGGAGGTTGGGGGCTCTGTGGAGGACCTGATTG  
CCAAAGGCCCGTCTCAAAGTACTCCAGGCGGTGCCAGCCGTGACCGAGGGGCCATTCCCGAGGTGCT  
CAAGAACTACATGGACGCCAGTACTACGGGGAGATTGGCATCGGGACGCCCCCAGTGCTTCACAGTC  
GTCTTCGACACGGGCTCCTCAACCTGTGGGTCCCCTCCATCCACTGCAAACCTGCTGGACATCGCTTGCT  
GGATCCACCACAAGTACAACAGCGACAAGTCCAGCACCTACGTGAAGAATGGTACCTCGTTTGACATCCA

CTATGGCTCGGGCAGCCTCTCCGGGTACCTGAGCCAGGACACTGTGTGCGGTGCCCTGCCAGTCAGCGTCG  
TCAGCCTCTGCCCTGGGCGGTGTCAAAGTGGAGAGGCAGGTCTTTGGGGAGGCCACCAAGCAGCCAGGCA  
TCACCTTCATCGCAGCCAAGTTCGATGGCATCCTGGGCATGGCCTACCCCCGCATCTCCGTCAACAACGT  
GCTGCCCCGTCTTCGACAACCTGATGCAGCAGAAGCTGGTGGACCAGAACATCTTCTCCTTCTACCTGAGC  
AGGGACCCAGATGCGCAGCCTGGGGGTGAGCTGATGCTGGGTGGCACAGACTCCAAGTATTACAAGGGTT  
CTCTGTCCTACCTGAATGTCACCCGCAAGGCCTACTGGCAGGTCCACCTGGACCAGGTGGAGGTGGCCAG  
CGGGCTGACCCTGTGCAAGGAGGGCTGTGAGGCCATTGTGGACACAGGCACTTCCCTCATGGTGGGCCCCG  
GTGGATGAGGTGCGCGAGCTGCAGAAGGCCATCGGGGCCGTGCCGCTGATTCAGGGCGAGTACATGATCC  
CCTGTGAGAAGGTGTCCACCCTGCCCCGCGATCACACTGAAGCTGGGAGGCAAAGGCTACAAGCTGTCCCC  
AGAGGACTACACGCTCAAGGTGTGCGCAGGCCGGAAGACCCTCTGCCTGAGCGGCTTCATGGGCATGGAC  
ATCCCGCCACCCAGCGGGCCACTCTGGATCCTGGGCGACGTCTTCATCGGCCGCTACTACACTGTGTTTG  
ACCGTGACAACAACAGGGTGGGCTTCGCCGAGGCTGCCCCGCTCTAGTTCCCAAGGCGTCCGCGCGCCAG  
CACAGAAACAGAGGAGAGTCCCAGAGCAGGAGGCCCTGGCCCAGCGGCCCTCCCACACACACCCACAC  
ACTCGCCCCGCCACTGTCCTGGGCGCCCTGGAAGCCGGCGGCCCAAGCCCCGACTTGCTGTTTTGTTCTGT  
GGTTTTCCCCTCCCTGGGTTTCAGAAATGCTGCCTGCCTGTCTGTCTCTCCATCTGTTTGGTGGGGGTAGA  
GCTGATCCAGAGCACAGATCTGTTTCGTGCATTGGAAGACCCACCCAAGCTTGGCAGCCGAGCTCGTGT  
ATCCTGGGGCTCCCTTCATCTCCAGGGAGTCCCCTCCCCGGCCCTACCAGCGCCCCGCTGGGCTGAGCCCC  
TACCCACACACAGGCCGTCTCCCGGGCCCTCCCTTGAAACCTGCCCTGCCTGAGGGCCCCCTCTGCCCA  
GCTTGGGCCCAGCTGGGCTCTGCCACCCTACCTGTTCAAGTGTCCCGGGCCCGTTGAGGATGAGGCCGCTA  
GAGGCCTGAGGATGAGCTGGAAGGAGTGAGAGGGGACAAAACCCACCTTGTTGGAGCCTGCAGGGTGGTG  
CTGGGACTGAGCCAGTCCCAGGGGCATGTATTGGCCTGGAGGTGGGGTTGGGATTGGGGGCTGGTGCCAG  
CCTCCTCTGCAGCTGACCTCTGTTGTCCTCCCCTTGGGCGGCTGAGAGCCCCAGCTGACATGGAAATAC  
AGTTGTTGGCCTCCGGCCTCCCCTC

>NM\_001912.5 Homo sapiens cathepsin L (CTSL), transcript variant 1, mRNA

AGAACCGCGACCTCCGCAACCTTGAGCGGCATCCGTGGAGTGCGCCTGCGCAGCTACGACCGCAGCAGGA  
AAGCGCCGCCGCCAGGCCAGCTGTGGCCGGACAGGGACTGGAAGAGAGGACGCGGTTCGAGTAGGTGTG  
CACCAGCCCTGGCAACGAGAGCGTCTACCCGAACCTCTGCTGGCCTTGAGGTGGGGAAGCCGGGGAGGGC  
AGTTGAGGACCCCGCGGAGGCGCGTGAAGTGGTTGAGCGGGCAGGCCAGCCTCCGAGCCGGGTGGACACAG  
GTTTTAAACATGAATCCTACACTCATCCTTGCTGCCTTTTGCTGGGAATTGCCTCAGCTACTCTAACA  
TTTGATCACAGTTTAGAGGCACAGTGGACCAAGTGAAGGCGATGCACAACAGATTATACGGCATGAATG  
AAGAAGGATGGAGGAGAGCAGTGTGGGAGAAGAACATGAAGATGATTGAACTGCACAATCAGGAATACAG  
GGAAGGGAAACACAGCTTCACAATGGCCATGAACGCCTTTGGAGACATGACCAGTGAAGAATTCAGGCAG  
GTGATGAATGGCTTTCAAACCGTAAGCCCAGGAAGGGGAAAGTGTTCAGGAACCTCTGTTTTATGAGG  
CCCCCAGATCTGTGGATTGGAGAGAGAAAGGCTACGTGACTCCTGTGAAGAATCAGGGTCAGTGTGGTTC  
TTGTTGGGCTTTTAGTGCTACTGGTGCTCTTGAAGGACAGATGTTCCGAAAACCTGGGAGGCTTATCTCA  
CTGAGTGAGCAGAATCTGGTAGACTGCTCTGGGCCTCAAGGCAATGAAGGCTGCAATGGTGGCCTAATGG  
ATTATGCTTTCCAGTATGTTCCAGGATAATGGAGGCCTGGACTCTGAGGAATCCTATCCATATGAGGCAAC  
AGAAGAATCCTGTAAGTACAATCCCAAGTATTCTGTTGCTAATGACACCGGCTTTGTGGACATCCCTAAG  
CAGGAGAAGGCCCTGATGAAGGCAGTTGCAACTGTGGGGCCATTTCTGTTGCTATTGATGCAGGTCATG  
AGTCCTCCTGTTCTATAAAGAAGGCATTTATTTTGAGCCAGACTGTAGCAGTGAAGACATGGATCATGG  
TGTGCTGGTGGTTGGCTACGGATTTGAAAGCACAGAATCAGATAACAATAAATATTGGCTGGTGAAGAAC  
AGCTGGGGTGAAGAATGGGGCATGGGTGGCTACGTAAAGATGGCCAAAGACCGGAGAAACCATTGTGGAA  
TTGCCTCAGCAGCCAGCTACCCCACTGTGTGAGCTGGTGGACGGTGATGAGGAAGGACTTGACTGGGGAT  
GGCGCATGCATGGGAGGAATTCATCTTCAGTCTACCAGCCCCGCTGTGTCGGATACACACTCGAATCAT  
TGAAGATCCGAGTGTGATTTGAATTCTGTGATATTTTCACACTGGTAAATGTTACCTCTATTTTAATTAC  
TGCTATAAATAGGTTTATATTATTGATTCACTTACTGACTTTGCATTTTCGTTTTTAAAGGATGTATAA  
ATTTTACCTGTTTAAATAAAATTTAATTTCAAATGTAGTGGTGGGGCTTCTTCTATTTTGTATGCACT

GAATTTTGTGTAATAAAGAACATAATTGGGCTCTAAGCCATAA

>NM\_002996.6 Homo sapiens C-X3-C motif chemokine ligand 1 (CX3CL1), transcript variant 1, mRNA

AAGGGGACAGCACTGAGCTCTGCCGCCTGGCTCTAGCCGCCTGCCTGGCCCCCGCCGGGACTCTTGCCCA  
CCCTCAGCCATGGCTCCGATATCTCTGTCGTGGCTGCTCCGCTTGGCCACCTTCTGCCATCTGACTGTCC  
TGCTGGCTGGACAGCACACGGTGTGACGAAATGCAACATCACGTGCAGCAAGATGACATCAAAGATACC  
TGTAGCTTTGCTCATCCACTATCAACAGAACCAGGCATCATGCGGCAAACGCGCAATCATCTTGAGACG  
AGACAGCACAGGCTGTTCTGTGCCGACCCGAAGGAGCAATGGGTCAAGGACGCGATGCAGCATCTGGACC  
GCCAGGCTGCTGCCCTAACTCGAAATGGCGGCACCTTCGAGAAGCAGATCGGCGAGGTGAAGCCCAGGAC  
CACCCCTGCCGCCGGGGGAATGGACGAGTCTGTGGTCCTGGAGCCCGAAGCCACAGGCGAAAGCAGTAGC  
CTGGAGCCGACTCCTTCTTCCCAGGAAGCACAGAGGGCCCTGGGGACCTCCCCAGAGCTGCCGACGGGCG  
TGACTGGTTCCTCAGGGACCAGGCTCCCCCGACGCCAAAGGCTCAGGATGGAGGGCCTGTGGGCACGGA  
GCTTTTCCGAGTGCCTCCCGTCTCCACTGCCGCCACGTGGCAGAGTTCTGCTCCCCACCAACCTGGGCCC  
AGCCTCTGGGCTGAGGCAAAGACCTCTGAGGCCCCGTCCACCCAGGACCCCTCCACCCAGGCCTCCACTG  
CGTCCTCCCCAGCCCCAGAGGAGAATGCTCCGTCTGAAGGCCAGCGTGTGTGGGGTCAGGGACAGAGCCC  
CAGGCCAGAGAACTCTCTGGAGCGGGAGGAGATGGGTCCCGTGCCAGCGCACACGGATGCCTTCCAGGAC  
TGGGGGCCTGGCAGCATGGCCACGTCTCTGTGGTCCCTGTCTCCTCAGAAGGGACCCCCAGCAGGGAGC  
CAGTGGCTTCAGGCAGCTGGACCCCTAAGGCTGAGGAACCCATCCATGCCACCATGGACCCCCAGAGGCT  
GGGCGTCCTTATCACTCCTGTCCCTGACGCCCAGGCTGCCACCCGGAGGCAGGCGGTGGGGCTGCTGGCC  
TTCCTTGGCCTCCTCTTCTGCCTGGGGGTGGCCATGTTACCTACCAGAGCCTCCAGGGCTGCCCTCGAA  
AGATGGCAGGAGAGATGGCGGAGGGCCTTCGCTACATCCCCGGAGCTGTGGTAGTAATTCATATGTCCT  
GGTGCCCGTGTGAACTCCTCTGGCCTGTGTCTAGTTGTTTGATTGAGACAGCTGCCTGGGATCCCTCATC  
CTCATACCCACCCCCACCCAAGGGCCTGGCCTGAGCTGGGATGATTGGAGGGGGGAGGTGGGATCCTCCA

GGTGACAAGCTCCAAGCTCCCAGGCATTCCCCAGGAGGCCAGCCTTGACCATTCTCCACCTGCCAGGGA  
CAGAGGGGGTGGCCTCCCAACTCACCCCAGCCCCAAAACCTCTCCTCTGCTGCTGGCTGGTTAGAGGTTCC  
CTTTGACGCCATCCCAGCCCCAATGAACAATTATTTATTAATGCCAGCCCCTTCTGACCCATGCTGCC  
CTGTGAGTACTACAGTCCTCCCATCTCACACATGAGCATCAGGCCAGGCCCTTGCCCACTCCCTGCAAC  
CTGATTGTGTCTCTTGGTCTGCTGCAGTTGCCAGTCACCCGGCCACCTGCGGTGCTATCTCCCCAGC  
CCCATCCTCTGTACAGAGCCCACGCCCCCACTGGTGACATGTCTTTTCTGCATGAGGCTAGTGTGGTGT  
TTCCTGGCACTGCTTCCAGTGAGGCTCTGCCCTTGGTTAGGCATTGTGGGAAGGGGAGATAAGGGTATCT  
GGTGACTTTCCTCTTTGGTCTACACTGTGCTGAGTCTGAAGGCTGGGTTCTGATCCTAGTTCCACCATCA  
AGCCACCAACATACTCCCATCTGTGAAAGGAAAGAGGGAGGTAAGGAATACCTGTCCCCCTGACAACACT  
CATTGACCTGAGGCCCTTCTCTCAGCCCCTGGATGCAGCCTCACAGTCCTTACCAGCAGAGCACCTTAG  
ACAGTCCCTGCCAATGGACTAACTTGTCTTTGGACCCTGAGGCCCAGAGGGCCTGCAAGGGAGTGAGTTG  
ATAGCACAGACCCTGCCCTGTGGGCCCCCAAATGGAAATGGGCAGAGCAGAGACCATCCCTGAAGGCCCC  
GCCCAGGCTTAGTCACTGAGACAGCCCGGGCTCTGCCTCCCATCACCCGCTAAGAGGGAGGGAGGGCTCC  
AGACACATGTCCAAGAAGCCCAGGAAAGGCTCCAGGAGCAGCCACATTCTGATGCTTCTTCAGAGACTC  
CTGCAGGCAGCCAGGCCACAAGACCCTTGTGGTCCCACCCACACACGCCAGATTCTTTCCTGAGGCTGG  
GCTCCCTTCCCACCTCTCTCACTCCTTGAAAACACTGTTCTCTGCCCTCCAAGACCTTCTCCTTACCTT  
TGTCCCCACCGCAGACAGGACCAGGGATTTCCATGATGTTTTCCATGAGTCCCCTGTTTGTCTGAAAG  
GGACGCTACCCGGGAAGGGGGCTGGGACATGGGAAAGGGGAAGTTGTAGGCATAAAGTCAGGGGTTCCCT  
TTTTTGCTGCTGAAGGCTCGAGCATGCCTGGATGGGGCTGCACCGGCTGGCCTGGCCCCCTCAGGGTCCC  
TGGTGGCAGCTCACCTCTCCCTTGATTGTCCCCGACCCTTGCCGTCTACCTGAGGGGCCTTTATGGGC  
TGGGTTCTACCCAGGTGCTAGGAACACTCCTTCACAGATGGGTGCTTGGAGGAAGGAAACCCAGCTCTGG  
TCCATAGAGAGCAAGACGCTGTGCTGCCCTGCCACCTGGCCTCTGCACTCCCCTGCTGGGTGTGGCGCA  
GCATATTCAGGAAGCTCAGGGCCTGGCTCAGGTGGGGTCACTCTGGCAGCTCAGAGAGGGTGGGAGTGGG  
CCCAATGCACTTTGTTCTGGCTCTTCCAGGCTGGGAGAGCCTTCCAGGGGTGGGACACCCTGTGATGGGG  
CCCTGCCTCCTTTGTGAGGAAGCCGCTGGGGCCAGTTGGTCCCCCTTCATGGACTTTGTTAGTTTCTCC

AAGCAGGACATGGACAAGGATGATCTAGGAAGACTTTGGAAAGAGTAGGAAGACTTTGGAAAGACTTTTC  
CAACCCTCATACCAACGTCTGTGCCATTTTGTATTTACTAATAAAATTTAAAAGTCTTGTGAA

>NM\_001008540.2 Homo sapiens C-X-C motif chemokine receptor 4 (CXCR4), transcript variant 1, mRNA

CTTCCCTCTAGTGGGCGGGGCAGAGGAGTTAGCCAAGATGTGACTTTGAAACCCTCAGCGTCTCAGTGCC  
CTTTTGTCTAAACAAAGAATTTTGTAAATTGGTTCTACCAAAGAAGGATATAATGAAGTCACTATGGGAA  
AAGATGGGGAGGAGAGTTGTAGGATTCTACATTAATTCTCTTGTGCCCTTAGCCCACTACTTCAGAAATT  
CCTGAAGAAAGCAAGCCTGAATTGGTTTTTTAAATTGCTTTAAAAATTTTTTTAACTGGGTTAATGCTT  
GCTGAATTGGAAGTGAATGTCCATTCTTTGCCTCTTTTGCAGATATACACTTCAGATAACTACACCGAG  
GAAATGGGCTCAGGGGACTATGACTCCATGAAGGAACCCTGTTCCGTGAAGAAAATGCTAATTTCAATA  
AAATCTTCCTGCCACCATCTACTCCATCATCTTCTTAACTGGCATTGTGGGCAATGGATTGGTCATCCT  
GGTCATGGGTTACCAGAAGAACTGAGAAGCATGACGGACAAGTACAGGCTGCACCTGTCAGTGGCCGAC  
CTCCTCTTTGTCATCACGCTTCCCTTCTGGGCAGTTGATGCCGTGGCAAACCTGGTACTTTGGGAACTTCC  
TATGCAAGGCAGTCCATGTCATCTACACAGTCAACCTCTACAGCAGTGTCTCATCCTGGCCTTCATCAG  
TCTGGACCGCTACCTGGCCATCGTCCACGCCACCAACAGTCAGAGGCCAAGGAAGCTGTTGGCTGAAAAG  
GTGGTCTATGTTGGCGTCTGGATCCCTGCCCTCCTGCTGACTATTCCCGACTTCATCTTTGCCAACGTCA  
GTGAGGCAGATGACAGATATATCTGTGACCGCTTCTACCCAATGACTTGTGGGTGGTTGTGTTCCAGTT  
TCAGCACATCATGGTTGGCCTTATCCTGCCTGGTATTGTCATCCTGTCCTGCTATTGCATTATCATCTCC  
AAGCTGTCACACTCCAAGGGCCACCAGAAGCGCAAGGCCCTCAAGACCACAGTCATCCTCATCCTGGCTT  
TCTTCGCTGTTGGCTGCCTTACTACATTGGGATCAGCATCGACTCCTTCATCCTCCTGGAAATCATCAA  
GCAAGGGTGTGAGTTTGAGAACACTGTGCACAAGTGGATTTCATCACCGAGGCCCTAGCTTTCTTCCAC  
TGTTGTCTGAACCCCATCCTCTATGCTTTCCTTGGAGCCAAATTTAAAACCTCTGCCAGCACGCACTCA  
CCTCTGTGAGCAGAGGGTCCAGCCTCAAGATCCTCTCAAAGGAAAGCGAGGTGGACATTCATCTGTTTC

CACTGAGTCTGAGTCTTCAAGTTTTCACTCCAGCTAACACAGATGTAAAAGACTTTTTTTTATACGATAA  
ATAACTTTTTTTTAAGTTACACATTTTTCAGATATAAAAGACTGACCAATATTGTACAGTTTTTATTGCT  
TGTTGGATTTTTGTCTTGTGTTTCTTAGTTTTTGTGAAGTTTAATTGACTTATTTATATAAATTTTTT  
TGTTTCATATTGATGTGTGTCTAGGCAGGACCTGTGGCCAAGTTCTTAGTTGCTGTATGTCTCGTGCTAG  
GACTGTAGAAAAGGGAAGTGAACATTCCAGAGCGTGTAGTGAATCACGTAAAGCTAGAAATGATCCCCAG  
CTGTTTATGCATAGATAATCTCTCATTCCCGTGGAACGTTTTTCCTGTTCTTAAGACGTGATTTTGCTG  
TAGAAGATGGCACTTATAACCAAAGCCCAAAGTGGTATAGAAATGCTGGTTTTTCAGTTTTCAGGAGTGG  
GTTGATTTCAGCACCTACAGTGTACAGTCTTGATTAAGTTGTTAATAAAAGTACATGTTAACTAAAA  
AAAAAAAAAAAAAA

>NM\_004938.4 Homo sapiens death associated protein kinase 1 (DAPK1), transcript variant 1, mRNA

GCTTCGGAGTGTGAGGAGGACAGCCGGACCGAGCCAACGCCGGGGACTTTGTTCCCTCCGCGGAGGGGAC  
TCGGCAACTCGCAGCGGCAGGGTCTGGGGCCGGCGCCTGGGAGGGATCTGCGCCCCCACTCACTCCCTA  
GCTGTGTTCCCGCCGCCCGCCCGGCTAGTCTCCGGCGCTGGCGCCTATGGTCGGCCTCCGACAGCGCTCC  
GGAGGGACCGGGGGAGCTCCCAGGCGCCCGGGACTGGAGACTGATGCATGAGGGGGCTACGGAGGCGCAG  
GAGCGGTGGTGATGGTCTGGGAAGCGGAGCTGAAGTGCCCTGGGCTTTGGTGAGGCGTGACAGTTTATCA  
TGACCGTGTTCAAGCAGGAAAACGTGGATGATTACTACGACACCGGCGAGGAACTTGGCAGTGGACAGTT  
TGCGGTTGTGAAGAAATGCCGTGAGAAAAGCACCGGCCTCCAGTATGCCGCCAAATTCATCAAGAAAAGG  
AGGACTAAGTCCAGCCGGCGGGGTGTGAGCCGCGAGGACATCGAGCGGGAGGTCAGCATCCTGAAGGAGA  
TCCAGCACCCCAATGTCATCACCTGCACGAGGTCTATGAGAACAAGACGGACGTCATCCTGATCTTGGA  
ACTCGTTGCAGGTGGCGAGCTGTTTGACTTCTTAGCTGAAAAGGAATCTTTAACTGAAGAGGAAGCAACT  
GAATTTCTCAAACAAATTCTTAATGGTGTTTACTACCTGCACTCCCTTCAAATCGCCCACTTTGATCTTA

AGCCTGAGAACATAATGCTTTTGGATAGAAATGTCCCCAACCTCGGATCAAGATCATTGACTTTGGGTT  
GGCCATAAAATTGACTTTGGAAATGAATTTAAAAACATATTTGGGACTCCAGAGTTTGTGCTCCTGAG  
ATAGTCAACTATGAACCTCTTGGTCTTGAGGCAGATATGTGGAGTATCGGGGTAATAACCTATATCCTCC  
TAAGTGGGGCCTCCCCATTTCTTGAGACACTAAGCAAGAAACGTTAGCAAATGTATCCGCTGTCAACTA  
CGAATTTGAGGATGAATACTTCAGTAATACCAGTGCCCTAGCCAAAGATTTCATAAGAAGACTTCTGGTC  
AAGGATCCAAAGAAGAGAATGACAATTCAAGATAGTTTGCAGCATCCCTGGATCAAGCCTAAAGATACAC  
AACAGGCACTTAGTAGAAAAGCATCAGCAGTAAACATGGAGAAATTCAAGAAGTTTGCAGCCCGGAAAAA  
ATGGAAACAATCCGTTGCTTGATATCACTGTGCCAAAGATTATCCAGGTCATTCTGTCCAGAAGTAAC  
ATGAGTGTTGCCAGAAGCGATGATACTCTGGATGAGGAAGACTCCTTTGTGATGAAAGCCATCATCCATG  
CCATCAACGATGACAATGTCCCAGGCCTGCAGCACCTTCTGGGCTCATTATCCAACATATGATGTTAACCA  
ACCCAACAAGCACGGGACACCTCCATTACTCATTGCTGCTGGCTGTGGGAATATTCAAATACTACAGTTG  
CTCATTAAGAGAGGCTCGAGAATCGATGTCCAGGATAAGGGCGGGTCCAATGCCGTCTACTGGGCTGCTC  
GGCATGGCCACGTCGATACCTTGAAATTTCTCAGTGAGAACAAATGCCCTTTGGATGTGAAAGACAAGTC  
TGGAGAGATGGCCCTCCACGTGGCAGCTCGCTATGGCCATGCTGACGTGGCTCAGTTACTGTGCAGCTTC  
GGCTCAAATCCCAATATCCAGGACAAGGAAGAAGAAACCCCCCTGCACTGTGCTGCTTGGCACGGCTATT  
ACTCTGTGGCCAAAGCCCTTTGTGAAGCCGGCTGTAACGTGAACATCAAGAACCGAGAAGGAGAGACGCC  
CCTCCTGACAGCCTCTGCCAGGGGCTACCACGACATCGTGGAGTGTCTGGCCGAACATGGAGCCGACCTT  
AATGCTTGCACAAAGGACGGACACATTGCCCTTCATCTGGCTGTAAGACGGTGTGAGATGGAGGTAATCA  
AGACTCTCCTCAGCCAAGGGTGTTTCGTCGATTATCAAGACAGGCACGGCAATACTCCCTCCATGTGGC  
ATGTAAAGATGGCAACATGCCTATCGTGGTGGCCCTCTGTGAAGCAAACGCAATTTGGACATCTCCAAC  
AAGTATGGGCGAACGCCTCTGCACCTTGCGCCAACAACGGAATCCTAGACGTGGTCCGGTATCTCTGTC  
TGATGGGAGCCAGCGTTGAGGCGCTGACCACGGACGGAAAGACGGCAGAAGATCTTGCTAGATCGGAACA  
GCACGAGCACGTAGCAGGTCTCCTTGCAAGACTTCGAAAGGATACGCACCGAGGACTCTTCATCCAGCAG  
CTCCGACCCACACAGAACCTGCAGCCAAGAATTAAGCTCAAGCTGTTTGGCCACTCGGGATCCGGGAAAA  
CCACCCTGTAGAATCTCTCAAGTGTGGGCTGCTGAGGAGCTTTTTCAGAAGGCGTCGGCCCAGACTGTC

TTCCACCAACTCCAGCAGGTTCCACCTTCACCCCTGGCTTCTAAGCCCACAGTCTCAGTGAGCATCAAC  
AACCTGTACCCAGGCTGCGAGAACGTGAGTGTGAGGAGCCGCAGCATGATGTTGAGCCGGTCTTACCA  
AAGGGATGCTGGAGGTGTTTGTGGCCCCGACCCACCACCCGCACTGCTCGGCCGATGACCAGTCCACCAA  
GGCCATCGACATCCAGAACGCTTATTTGAATGGAGTTGGCGATTTTCAGCGTGTGGGAGTTCTCTGGAAAT  
CCTGTGTATTTCTGCTGTTATGACTATTTTGCTGCAAATGATCCCACGTCAATCCATGTTGTTGTCTTTA  
GTCTAGAAGAGCCCTATGAGATCCAGCTGAACCAAGTGATTTTCTGGCTCAGTTTCCTGAAGTCCCTTGT  
CCCAGTTGAAGAACCCATAGCCTTCGGTGGCAAGCTGAAGAACCCACTCCAAGTTGTCCTGGTGGCCACC  
CACGCTGACATCATGAATGTTCTCGACCGGCTGGAGGCGAGTTTGGATATGACAAAGACACATCGTTGC  
TGAAAGAGATTAGGAACAGGTTTGGAAATGATCTTCACATTTCAAATAAGCTGTTTGTCTGGATGCTGG  
GGCTTCTGGGTCAAAGGACATGAAGGTACTTCGAAATCATCTGCAAGAAATACGAAGCCAGATTGTTTCG  
GTCTGTCCTCCCATGACTCACCTGTGTGAGAAAATCATCTCCACGCTGCCTTCCTGGAGGAAGCTCAATG  
GACCCAACCAGCTGATGTCGCTGCAGCAGTTTGTGTACGACGTGCAGGACCAGCTGAACCCCTGGCCAG  
CGAGGAGGACCTCAGGCGCATTGCTCAGCAGCTCCACAGCACAGGCGAGATCAACATCATGCAAAGTGAA  
ACAGTTCAGGACGTGCTGCTCCTGGACCCCCGCTGGCTCTGCACAAACGTCCTGGGGAAGTTGCTGTCCG  
TGGAGACCCACGGGCGCTGCACCACTACCGGGGCGCTACACCGTGGAGGACATCCAGCGCCTGGTGCC  
CGACAGCGACGTGGAGGAGCTGCTGCAGATCCTCGATGCCATGGACATCTGCGCCCGGGACCTGAGCAGC  
GGGACCATGGTGGACGTCCCAGCCCTGATCAAGACAGACAACCTGCACCGCTCCTGGGCTGATGAGGAGG  
ACGAGGTGATGGTGTATGGTGGCGTGCGCATCGTGCCCGTGGAACACCTCACCCCTTCCCATGTGGCAT  
CTTTCACAAGGTCCAGGTGAACCTGTGCCGGTGGATCCACCAGCAAAGCACAGAGGGGCGACGCGGACATC  
CGCCTGTGGGTGAATGGCTGCAAGCTGGCCAACCGTGGGGCCGAGCTGCTGGTGTCTGGTCAACCACG  
GCCAGGGCATTGAGGTCCAGGTCCGCGGCCTGGAGACGGAGAAGATCAAGTGCTGCCTGCTGCTGGACTC  
GGTGTGCAGCACCATTGAGAACGTCATGGCCACCACGCTGCCAGGGCTCCTGACCGTGAAGCATTACCTG  
AGCCCCCAGCAGCTGCGGGAGCACCATGAGCCCGTCATGATCTACCAGCCACGGGACTTCTTCCGGGCAC  
AGACTCTGAAGGAAACCTCACTGACCAACACCATGGGGGGGTACAAGGAAAGCTTCAGCAGCATCATGTG  
CTTCGGGTGTACGACGTCTACTCACAGGCCAGCCTCGGCATGGACATCCATGCATCAGACCTGAACCTC

CTCACTCGGAGGAACTGAGTCGCCTGCTGGACCCGCCCGACCCCTGGGGAAGGACTGGTGCCTTCTCG  
CCATGAACTTAGGCCTCCCTGACCTCGTGGCAAAGTACAACACCAGTAACGGGGCTCCAAGGATTTCT  
CCCCAGCCCCCTCCACGCCCTGCTGCGGGAATGGACCACCTACCCTGAGAGCACAGTGGGCACCCTCATG  
TCCAACTGAGGGAGCTGGGTCGCCGGGATGCCGCAGACTTTTTGCTGAAGGCATCCTCTGTGTTCAAAA  
TCAACCTGGATGGCAATGGCCAGGAGGCCTATGCCTCGAGCTGCAACAGCGGCACCTCTTACAATTCCAT  
TAGCTCTGTTGTATCCCGGTGAGGGCAGCCTCTGGCTTGGGCAGGGTCTGTTTGGACTGCAGAAGCAAGG  
GGGTGATGTAGCCCATCCTTCCCTTTGGAGATGCTGAGGGTGTTCCTGCACCCACAGCCAGGGGGA  
TGCCACTCCTCCCTCCGGCTTGACCTGTTTCTGCCGCTACCTCCCTCCCGTCTCATTCCGTTGTCTG  
TGGATGGTCATTGCAGTTTAAGAGCAGAACAGATCTTTTACTTTGGCCGCTTGAAAAGCTAGTGTACCTC  
CTCTCAGTGTTTTGGACTCCATCTCTCATCCTCCAGTACCTTGCTTCTTACTGATAATTTTGTGGAATT  
CCTAACTTTTCAATGACATTTTTTTTAACTACTATATTGATTGTCCTTTAAAAAAGAAAAGTGCATATTT  
ATCCAAAATGTGTATTTCTTATACGCTTTTCTTGTTATACCATTCCTCAGCTTATCTCTTTTATATTT  
GTAGGAGAACTCCCATGTATGGAATCCCACTGTATGATTTATAAACAGACAATATGTGAGTGCCTTTTG  
CAGAAGAGGGTGTGTTTGAAATCATCGGAGTCAGCCAGGAGCTGTCACCAAGGAAACGCTACCTCTCTGT  
CCCTTGCTGTATGCTGATCATCGCCAGAGGTGCTTCACCCTGAGTTTTGTTTTGTATTGTTTTCTGACAG  
TTTTTCTGTTTTGTTTGGCAAGGAAAGGGGAGAAGGGAATCCTCCTCCAGGGTGATTTTATGATCAGTGT  
TGTTGCTCTAGGAAGACATTTTTCCGTTTGCTTTTGTCCAATGTCAATGTGAACGTCCACATGAAACCT  
ACACACTGTCATGCTTCATCATTCCCTCTCATCTCAGGTAGAAGGTTGACACAGTTGTAGGGTTACAGAG  
ACCTATGTAAGAATTCAGAAGACCCCTGACTCATCATTTGTGGCAGTCCCTTATAATTGGTGCATAGCAG  
ATGGTTTCCACATTTAGATCCTGGTTTCATAACTTCCTGTACTTGAAGTCTAAAAGCAGAAAATAAAGGA  
AGCAAGTTTTCTCCATGATTTTAAATTGTGATCGAGTTTTAAATTGATAGGAGGGAACATGTCCTAATT  
CTTCTGTCCTGAGAAGCATGTAATGTTAATGTTATATCATATGTATATATATATATGCACTATGTATATA  
CATATATATTAATACTGGTATTTTTACTTAATCTATAAAATGTCGTTAAAAAGTTGTTTGTTTTTTTCTT  
TTTTTATAAATAAACTGTTGCTCGTTGCATTA

>NM\_014326.5 Homo sapiens death associated protein kinase 2 (DAPK2), transcript variant 1, mRNA

CTCGGCTCCTAGGCTGCTCGGCGGGCGGGTGCCGGGCGCTCTGGGAGGAGAGGACTGCAGGGCCGAGCCC  
AGCGCACCCCGCCGCGTCCCCGTTCCCGCCGCGCCCGCCGCGCCCGCCGCGCCCGCCGCGCCCGCCGCT  
CCCGCCGCGCCTGCCGCGGCCGCGACCGCGGCAGCTCAGCCTCCCGCCGATTGTATGTTCCAGGCCTCAA  
TGAGGAGTCCAAACATGGAGCCATTCAAGCAGCAGAAGGTGGAGGACTTTTATGACATCGGAGAGGAGCT  
GGGGAGTGGCCAGTTTGCCATCGTGAAGAAGTGCCGGGAGAAGAGCACGGGGCTTGAGTATGCAGCCAAG  
TTCATCAAGAAGCGGCAGAGCCGGGCGAGCCGGCGCGGTGTGAGCCGGGAGGAGATCGAGCGGGAGGTGA  
GCATCCTGCGGCAGGTGCTGCACCACAATGTCATCACGCTGCACGACGTCTATGAGAACCGCACCGACGT  
GGTGCTCATCCTTGAGCTAGTGTCTGGAGGAGAGCTCTTCGATTCCTGGCCCAGAAGGAGTCACTGAGT  
GAGGAGGAGGCCACCAGCTTCATTAAGCAGATCCTGGATGGGGTGAACCTTACACAAAAGAAAATTG  
CTCACTTTGATCTCAAGCCAGAAAACATTATGTTGTTAGACAAGAATATTCCCATTCCACACATCAAGCT  
GATTGACTTTGGTCTGGCTCACGAAATAGAAGATGGAGTTGAATTTAAGAATATTTTTGGGACGCCGGAA  
TTTGTTGCTCCAGAAATTGTGAACTACGAGCCCCTGGGTCTGGAGGCTGACATGTGGAGCATAGGCGTCA  
TCACCTACATCCTCTTAAGTGGAGCATCCCCCTTCCTGGGAGACACGAAGCAGGAAACACTGGCAAATAT  
CACAGCAGTGAGTTACGACTTTGATGAGGAATTCTTCAGCCAGACGAGCGAGCTGGCCAAGGACTTTATT  
CGGAAGCTTCTGGTTAAAGAGACCCGGAACGGCTCACAATCCAAGAGGCTCTCAGACACCCCTGGATCA  
CGCCGGTGGACAACCAGCAAGCCATGGTGCGCAGGGAGTCTGTGGTCAATCTGGAGAACTTCAGGAAGCA  
GTATGTCCGCAGGCGGTGGAAGCTTCCTTCAGCATCGTGTCCCTGTGCAACCACCTACCCGCTCGCTG  
ATGAAGAAGGTGCACCTGAGGCCGGATGAGGACCTGAGGAACTGTGAGAGTGACACTGAGGAGGACATCG  
CCAGGAGGAAAGCCCTCCACCCACGGAGGAGGAGCAGCACCTCCTAACTGGCCTGACCTGCAGTGGCCGC  
CAGGGAGGTCTGGGCCCAGCGGGGCTCCCTTCTGTGCAGACTTTTGGACCCAGCTCAGCACCAGCACCCG  
GGCGTCCTGAGCACTTTGCAAGAGAGATGGGCCCAAGGAATTCAGAAGAGCTTGCAGGCAAGCCAGGAGA

CCCTGGGAGCTGTGGCTGTCTTCTGTGGAGGAGGCTCCAGCATTCCCAAAGCTCTTAATTCTCCATAAAA  
TGGGCTTTCCTCTGTCTGCCATCCTCAGAGTCTGGGGTGGGAGTGTGGACTTAGGAAAACAATATAAAGG  
ACATCCTCATCATCACGGGGTGAAGGTCAGACTAAGGCAGCCTTCTTCACAGGCTGAGGGGGTTCAGAAC  
CAGCCTGGCCAAAAATTACACCAGAGAGACAGAGTCTCCCCATTGGGAACAGGGTGATTGAGGAAAGTG  
AACCTTGGGTGTGAGGGACCAATCCTGTGACCTCCAGAACCATGGAAGCCAGGACGTCAGGCTGACCAA  
CACCTCAGACCTTCTGAAGCAGCCCATTGCTGGCCCGCCATGTTGTAATTTTGCTCATTTTTATTAACT  
TCTGGTTTACCTGATGCTTGGCTTCTTTTAGGGCTACCCCATCTCATTTCTTTAGCCCGTGTGCCTGT  
AACTCTGAGGGGGGGCACCCAGTGGGGTGCTGAGTGGGCAGAATCTCAGAAGGTCTCCTGAACCGTCCG  
CGCAGGCCTGCAGTGGGCCTGCCTCCTTGCTTCCCTAACAGGAAGGTGTCCAGTTCAAGAGAACCCA  
CCCAGAGACTGGGAGTGGTGGCTCACGCCTATAATCCCTGCGCTTTGGCAGTCCGAGGCAGGGGAATTGC  
TTGAACTCAGGAGTTGGAGACCAGCCTGGGCAACATGGCAAAACGCAGTCTGTACAAAAAATACAAAAA  
TTAGCCAGGTGTAGGGGTAGGCACCTGGCATCCCAGCTACTCCAGGGGCTGAGGTGACAGCATTGCTTAA  
GCCCAGAAGGTCGAGGCTGCAGTGAGCTGAGATCACGCCACTGCACTCCAGTCTGGGTGACAGAGAGAGA  
CCATATCCAAAAAAAAAAAAAGTTGCCAGAGACGAGTATGCCCATGCTCCCTCTACCTCACTGCCACCAC  
TCCTGCTGTTAGGAGCTGAGTGTGTCTCCCTAAAATTTCTATGTTGAAGTCTTAACCCTTGGTACCACAG  
AATATCACTGTATTTGGAGATGGGGTCTTTAGAAAGGCACTTAAATTAATGAGCTCACTGATATGGGC  
CCCGATGCAATATAATTGGTGTCTTATAAGAAGGGGAGGTTAGGACACGCAGGAAAGACCACATGAAGG  
CCCAGGAGTGGGAGGGGGAATAGCCATCGACAACTAAGGGGGCCTCAGAGGAAACCAACCCTGCTGACA  
CCTCAATCTTAGACTCTGGCCTCAAAAATTGTAAGAAAATAAACTTCTGTCTTTAAGCCA

>NM\_004083.6 Homo sapiens DNA damage inducible transcript 3 (DDIT3), transcript variant 5, mRNA  
GTCAGAGACTTAAGTCTAAGGCACTGAGCGTATCATGTTAAAGATGAGCGGGTGGCAGCGACAGAGCCAA

AATCAGAGCTGGAACCTGAGGAGAGAGTGTTCAAGAAGGAAGTGTATCTTCATACATCACCACACCTGAA  
AGCAGATGTGCTTTTCCAGACTGATCCAACTGCAGAGATGGCAGCTGAGTCATTGCCTTTCTCCTTCGGG  
AACTGTCCAGCTGGGAGCTGGAAGCCTGGTATGAGGACCTGCAAGAGGTCCTGTCTTCAGATGAAAATG  
GGGGTACCTATGTTTCACCTCCTGGAAATGAAGAGGAAGAATCAAAAATCTTCACCACTCTTGACCCTGC  
TTCTCTGGCTTGGCTGACTGAGGAGGAGCCAGAACCAGCAGAGGTCACAAGCACCTCCCAGAGCCCTCAC  
TCTCCAGATTCCAGTCAGAGCTCCCTGGCTCAGGAGGAAGAGGAGGAAGACCAAGGGAGAACCAGGAAAC  
GGAAACAGAGTGGTCATTCCCCAGCCCGGGCTGGAAAGCAGCGCATGAAGGAGAAAGAACAGGAGAATGA  
AAGGAAAGTGGCACAGCTAGCTGAAGAGAATGAACGGCTCAAGCAGGAAATCGAGCGCCTGACCAGGGAA  
GTAGAGGCGACTCGCCGAGCTCTGATTGACCGAATGGTGAATCTGCACCAAGCATGAACAATTGGGAGCA  
TCAGTCCCCCACTTGGGCCACACTACCCACCTTTCCAGAAGTGGCTACTGACTACCCTCTCACTAGTGC  
CAATGATGTGACCCTCAATCCCACATACGCAGGGGGAAGGCTTGGAGTAGACAAAAGGAAAGGTCTCAGC  
TTGTATATAGAGATTGTACATTTATTTATTACTGTCCCTATCTATTAAAGTGACTTTCTATGA

>NM\_004675.5 Homo sapiens DIRAS family GTPase 3 (DIRAS3), mRNA

GTGTCCAGTTGGTTGCCGCGGCAGTCTCTCCGAGCAGCGCATTTGTCTTCTAGGCTGCTTGGTTCGTGCC  
TCCGAGAAAGGGTCTCCTGCTGCCAGCTAAGTGTGGGAGAACTTGTGCACGTATCTCCCCTCCGAATCC  
CAACGATGGGTAACGCCAGCTTTGGCTCCAAGGAACAGAAGCTGCTGAAGCGGTTGCGGCTTCTGCCCCG  
CCTGCTTATCCTCCGCGCCTTCAAGCCCCACAGGAAGATCAGAGATTACCGCGTCGTGGTAGTCGGCACC  
GCTGGTGTGGGGAAAAGTACGCTGCTGCACAAGTGGGCGAGCGGCAACTCCGTCATGAGTACCTGCCGA  
CCATTGAAAATACCTACTGCCAGTTGCTGGGCTGCAGCCACGGTGTGCTTTCCCTGCACATCACCGACAG  
CAAGAGTGGCGACGGCAACCGCGCTCTGCAGCGCCACGTTATAGCCCGGGGCCACGCCTTCGTCTGGTC  
TACTCAGTCACCAAGAAGGAAACCCTGGAAGAGCTGAAGGCCTTCTATGAGCTGATCTGCAAGATCAAAG

GTAACAACCTGCATAAGTTCCCATCGTGCTGGTGGGCAATAAAAGTGATGACACCCACCGGGAGGTGGC  
CCTGAATGATGGTGCCACCTGTGCGATGGAGTGGAATTGCGCCTTCATGGAGATTTAGCCAAGACCGAT  
GTGAATGTGCAGGAGCTGTTCCACATGCTGCTGAATTACAAGAAAAAGCCCACCACCGGCCTCCAGGAGC  
CCGAGAAGAAATCCCAGATGCCAACACCACTGAGAAGCTGCTTGACAAGTGCATAATCATGTGAGCCCT  
GGGCCTTAAGAGCCAGCTCTTCCTATCCTGTAGCGTGTAGAAAACGTGGACTCATTTCACTATGTTACAT  
GTACATGGTTGATTTTGTGCTGTTGTTGGACTGTAACATCCATGTTGTCAATACGTATACCTTGTAAGT  
GGATAACTTTTCTTTTCCAGGCCAGAGAATTCAAATTGTTAAACATTGGCATTGAAGAGGAGAACA  
AAATGTAGCATGATGTATTTAAAGTAAGGCCTTTAGTAATGAATGTAATGAGAGAAAATGTTTTGAAAAG  
AACAAAACATCAAATGAATAGAAAGAAAAATTGGAAGGCGTCCTTTGGTAACCCGATTATTGTGTATT  
ACCTTTAAATATTTACATCCTGTAAGTGCTTAATCATATCTTTAATTGTGTATTTAAGAAAAGTGTTT  
TCACAACAAAAGCTTTTGATAAATTGCTGCGTGACATATACTAAATAAAAAAATGAATATGTTGATCATT  
AGGGGTGTGGGAGCAGAGAAAATTGTGAAAGTGACTCTCACTAAAGATGTTAGTAGTTTCTCATGTCATT  
TAAAAATGTTTGAGTATTCTGCATAGCAGTTTGTAAGTGTAACAGCTTATTGACTTAATAAGCTTTT  
CCTGCATGCAA

>NM\_182643.3 Homo sapiens DLC1 Rho GTPase activating protein (DLC1), transcript variant 1, mRNA

AGTCTGAATTTAGTAGACAGAAGTCACTAGGAATGCCTTGACAGGATCCTGCCTTAGCTAAGGCTCCCTC  
CAGCTGCAGAGGGTGTTTTTGTAGACTCACACACTGCGTGAACTGCTCAGAATAGAGCCATGATCTCA  
ACCACGAAATGGGAAGTTAGATTTTGGAGAACTAACGGGGACGGACTTCTTCCTAGCCTGAGTGTTGA  
GCAGTGTCATGCCTTGGCGTTTCAGCTCCTCGTTGTCTAGGTGGTGAAATGACAGAACTATTCGCTTCT  
TTGATTGGTGATTTTGAAATAATCTTTCATCAAGTTCCATCTCCTTTACCCTCATATGGAATATATCTCT  
CTGTCTGTTGTAACTACGATGACATGTCTGTAGCTATCAGAAAGAGAAGCTGGGAAGAACATGTGACC  
CACTGGATGGGACAGCCTTTTAATTCTGATGATCGTAACACAGCATGTCATCATGGACTAGTAGCTGACA

GCTTGCAGGCAAGTATGGAAAAAGATGCAACTCTAAATGTGGACCGCAAAGAGAAGTGTGTTTCACTACC  
TGA CTGCTGTCATGGATCAGAGCTGAGAGATTTTCTGGGAGGCCAATGGGTCATCTTTCAAAGGATGTG  
GACGAAAATGACAGCCATGAAGGTGAAGATCAGTTTCTTCTCTGGAAGCCAGCACAGAAACACTAGTGC  
ATGTTTCTGATGAGGATAACAATGCTGATTTATGCCTTACAGATGATAAACAGGTTTTAAATACCCAAGG  
GCAGAAAACATCAGGCCAACATATGATCCAAGGAGCAGGCTCCTTAGAAAAGGCACTGCCATCATACAA  
AGTAACCAAGTTTCTTCTAACTCCTGGGAATAGCTGGTGAAACTGAATTAGCACTGGTAAAAGAAAGTG  
GGGAGAGAAAAGTTACTGACTCTATAAGTAAAAGCCTGGAGCTTTGCAATGAAATAAGCTTAAGTGAAAT  
AAAAGATGCACCCAAAGTAAATGCAGTGGATACTTTGAACGTGAAAGATATTGCACCTGAGAAACAATTG  
CTTAACTCTGCTGTAATTGCTCAGCAACGAAGGAAACCTGACCCCCCTAAAGATGAAAATGAAAGAAGCA  
CCTGCAATGTAGTACAAAATGAGTTCTTGGATACTCCTTGACAAACAGAGGACTGCCATTATTA AAAAC  
AGATTTTGGAAGCTGCCTTCTGCAGCCTCCTTCTGCCCCAATGGAATGTCAGCTGAAAATGGCCTGGAG  
AAGAGTGGTTTTT CACAACATCAAAACAAAAGTCCACCAAAGGTCAAGGCAGAAGATGGCATGCAGTGTT  
TACAATTAAAGGAGACCCTGGCCACCCAGGAACCCACAGATAACCAAGTCAGACTTCGTAAGAGAAAGGA  
AATAAGAGAAGATCGAGATAGGGCGCGGCTGGACTCCATGGTGCTGCTGATTATGAAACTGGACCAGCTT  
GATCAGGACATAGAAAATGCCCTCAGCACCAGCTCCTCTCCATCAGGCACACCAACAAACCTGCGGCGGC  
ACGTTCTGATCTGGAATCAGGATCTGAAAGTGGAGCAGATACCATTT CAGTAAATCAGACACGAGTAAA  
TTTGTCTTCTGACACTGAGTCCACGGACCTCCCATCTTCCACTCCAGTAGCCAATTCTGGAACCAAACCC  
AAGACTACGGCTATTCAAGGTATTT CAGAGAAGGAAAAGGCTGAAATTGAAGCCAAGGAAGCTTGTGATT  
GGCTACGGGCAACTGGTTTCCCCAGTATGCACAGCTTTATGAAGATTTCTGTTCCCCATCGATATTT C  
CTTGGTCAAGAGAGAGCATGATTTTTTGGACAGAGATGCCATTGAGGCTCTATGCAGGCGTCTAAATACT  
TTAAACAAATGTGCGGTGATGAAGCTAGAAATTAGTCCTCATCGGAAACGAAGTGACGATTCAGACGAGG  
ATGAGCCTTG TGCCATCAGTGGCAAATGGACTTTCAAAGGGACAGCAAGAGGTGGTCCCGGCTTGAAGA  
GTTTGATGTCTTTTCTCAAACAAAGACCTGGTCCCTGGGTCCCCAGACGACTCCCACCCGAAGGACGGC  
CCCAGCCCCGGAGGCACGCTGATGGACCTCAGCGAGCGCCAGGAGGTGTCTTCGTCCGCAGCCTCAGCA  
GCACTGGCAGCCTCCCCAGCCACGCGCCCCCAGCGAGGATGCTGCCACCCCCCGGACTAACTCCGT CAT

CAGCGTTTGCTCCTCCAGCAACTTGGCAGGCAATGACGACTCTTTCGGCAGCCTGCCCTCTCCAAGGAA  
CTGTCCAGCTTCAGCTTCAGCATGAAAGGCCACGAAAAAACTGCCAAGTCCAAGACGCGCAGTCTGCTGA  
AACGGATGGAGAGCCTGAAGCTCAAGAGCTCCCATCACAGCAAGCACAAAGCGCCCTCAAAGCTGGGGTT  
GATCATCAGCGGGCCCATCTTGCAAGAGGGGATGGATGAGGAGAAGCTGAAGCAGCTCAACTGCGTGGAG  
ATCTCCGCCCTCAATGGCAACCGCATCAACGTCCCCATGGTACGAAAGAGGAGCGTTTCCAATCCACGC  
AGACCAGCAGCAGCAGCAGCCAGTCGGAGACCAGCAGCGCGGTACGACGCCCAGCCCTGTTACGAGGAC  
CCGGAGCCTCAGTGCGTGCAACAAGCGGGTGGGCATGTACTTAGAGGGCTTCGATCCTTTCAATCAGTCA  
ACATTTAACAACGTGGTGGAGCAGAACTTTAAGAACCGCGAGAGCTACCCAGAGGACACGGTGTTCTACA  
TCCCTGAAGATCACAAGCCTGGCACTTTCCCCAAAGCTCTACCAATGGCAGTTTCTCCCCCTCGGGGAA  
TAACGGCTCTGTGAACTGGAGGACGGGAAGCTTCCACGGCCCTGGCCACATCAGCCTCAGGAGGGAAAAC  
AGTAGCGACAGCCCCAAGGAACTGAAGAGACGCAATTCTCCAGCTCCATGAGCAGCCGCTGAGCATCT  
ACGACAACGTGCCGGGCTCCATCCTCTACTCCAGTTCAGGGGACCTGGCGGATCTGGAGAACGAGGACAT  
CTCCCCGAGCTGGACGACATCCTCTACCACGTGAAGGGGATGCAGCGGATAGTCAATCAGTGGTCGGAG  
AAGTTTTCTGATGAGGGAGATTCGGA CTGAGCCCTGGACTCGGTCTCTCCCTGCCCCGTCTCTCCAAAAC  
AGATACACCTGGATGTGGACAACGACCGAACCACACCCAGCGACCTGGACAGCACAGGCAACTCCCTGAA  
TGAACCGGAAGAGCCCTCCGAGATCCCGGAAAGAAGGGATTCTGGGGTTGGGGCTTCCCTAACCAGGTCC  
AACAGGCACCGACTGAGATGGCACAGTTTCCAGAGCTCACATCGGCCAAGCCTCAACTCTGTATCACTAC  
AGATTA ACTGCCAGTCTGTGGCCCAGATGAACCTGCTGCAGAAATACTCACTCCTAAAGCTAACGGCCCT  
GCTGGAGAAATACACACCTTCTAACAAGCATGGTTTTAGCTGGGCCGTGCCCAAGTTCATGAAGAGGATC  
AAGGTTCCAGACTACAAGGACCGGAGTGTGTTGGGGTCCCACTGACGGTCAACGTGCAGCGCACAGGAC  
AACGTTGCCTCAGAGCATCCAGCAGGCCATGCGATACCTCCGGAACCATTTGTTGGATCAGGTTGGGCT  
CTTCAGAAAATCGGGGGTCAAGTCCCGGATTCAGGCTCTGCGCCAGATGAATGAAGGTGCCATAGACTGT  
GTCAACTACGAAGGACAGTCTGCTTATGACGTGGCAGACATGCTGAAGCAGTATTTTCGAGATCTTCCTG  
AGCCACTAATGACGAACAACTCTCGGAAACCTTTCTACAGATCTACCAATATGTGCCCAAGGACCAGCG  
CCTGCAGGCCATCAAGGCTGCCATCATGCTGCTGCCTGACGAGAACCGGGAGGTTCTGCAGACCCTGCTT

TATTCCTGAGCGATGTCACAGCAGCCGTAAAAGAAAACCAGATGACCCCAACCAACCTGGCCGTGTGCT  
TAGCGCCTTCCCTCTTCCATCTCAACACCCTGAAGAGAGAGAATTCCTCTCCAGGGTAATGCAAAGAAA  
ACAAAGTTTGGGCAAACCAGATCAGAAAGATTTGAATGAAAACCTAGCTGCCACTCAAGGGCTGGCCCAT  
ATGATCGCCGAGTGCAAGAAGCTTTTCCAGGTTCCCGAGGAAATGAGCCGATGTCGTAATTCCTATACCG  
AACAAGAGCTGAAGCCCCTCACTCTGGAAGCACTCGGGCACCTGGGTAATGATGACTCAGCTGACTACCA  
ACACTTCCTCCAGGACTGTGTGGATGGCCTGTTTAAAGAAGTCAAAGAGAAGTTTAAAGGCTGGGTGAGC  
TACTCCACTTCGGAGCAGGCTGAGCTGTCCTATAAGAAGGTGAGCGAAGGACCCCTCTGAGGCTTTGGA  
GGTCAGTCATTGAAGTCCCTGCTGTGCCAGAGGAAATCTTAAAGCGCCTACTTAAAGAACAGCACCTCTG  
GGATGTAGACCTGTTGGATTCAAAGTGATCGAAATTCTGGACAGCCAAACTGAAATTTACCAGTATGTC  
CAAAACAGTATGGCACCTCATCCTGCTCGAGACTACGTTGTTTAAAGAACCTGGAGGACTAATTTACCCA  
AAGGAGCCTGTGCCCTTTTACTAACCTCTGTGGATCACGATCGCGCACCTGTGGTGGGTGTGAGGGTTAA  
TGTGCTCTTGCCAGGTATTTGATTGAACCCTGTGGGCCAGGAAAATCCAACTCACCTACATGTGCAGA  
GTTGACTTAAGGGGCCACATGCCAGAATGGTACACAAAATCTTTGGACATTTGTGTGCAGCTGAAGTTG  
TAAAGATCCGGGATTCCTTCAGTAACCAGAACACTGAAACCAAAGACACCAAATCTAGGTGATCACTGAA  
GCAACGCAACCGCTTCCACCACCATGGTGTTTGTCTAGAACTTTTGCCAGTCCTTGAAGAATGGGTTC  
TGTGTCTAATCCTGAAACAAAGAAAACACTACAAGCTGGAGTGTAGGAATTGACTATAGCAATTTGATACAT  
TTTTAAAGCTGCTTCTGTTTGTGAGGGTCTGTATTCATAGACCTTGACTGGAATATGTAAGACTGTGC  
AAAAAAAAAAAAAAAAAATTTATGTGTATTCTTATTCAAATTGCTTCTGAGAAGCAAACTCTTTAAATACA  
TTATGGAAGATAATGAAGATACTTCATTCTTGTGATATCAGTGTATGCGTACCTGTGTGCTTTATTT  
GCAGTGTGTTGAGGGACTGGTGTATCCACTGGAATAGTTGGTACTCTTGGATGTGTTTTCTACCAAGAT  
GAGCAAAGAAAGGTTTGCACAGAGGAGTGTGAATGTGTGTTTGTGCTGGCTGAATGGCAATAGATGTCT  
AAGGTGGATTCAGTGTCTGGCACACTGAGACACCTCCAAGAAGGAGATTGATGCATCAGGTTCAAGTTAA  
CCTGGAATATCTGACTACCCCTGAATCCACCCAGAAAGGGGGCCCAACACCCTTGTCATTTATGGGTAT  
TTTTTTTCGAAGTTATTAAGCATATTCCTTTTCCACGAACCTCTTCTGTACTTTGATTGTAATAGGTTGG  
CTCTTACACCCATTCCAAATGCAGTTTATTTTAGACCCGATTGCAAATAGTGATGTAGTTTAAACAGT

ATGGATTAGTTCAGGGATGAACTGCTCCCTCTAGCCTTACTGGCTCTGATCCACAGGGTTTTGTTTTGTT  
TTGTTTTGTTTTTTGTTAAGTCGAGATATAAAAACTGAACACGATAACACTTACTCTTAAATCAAGCAT  
CAACACTTTTTCCCTGTTAGAATTCTTGCATTTTTGTGTTTGTAACAGAAACGCCTTAAGACACTATGT  
TTGGGAATATAGGAACTATGTGTGTCCAAGGAAATCCCTGTAAATTTAACTCACCTACAAAAGGCTTT  
TTCCCCGCCTTTGGTTGTTAACGGCATTCTGAAAGCCACATGTGTTTATTCATTGGGCTTGTTCTTATC  
AGCAAATAGGTTTTCTGGTTTTATGACTTTTTGTCTTATTTTATTTTCTACATTTCTTTTTTTTTTT  
TTTCCTTTAGAATGCCCTGGAAATATATTTAAGTGGTAATGAAAAATAGTAATCATAGTAAACGCAACA  
AGAAGAAAACCAACCCAAACCAGTGAAGTTTTTTAGAACCTTTAGAAGGGTGGTCTTTATTCAGGTTTTA  
CTGTAATGGTAAGGATTGACTCAAGAGACAGTATTAGTAAATTTATTGTGTATGGATCAAAAGTGAATAA  
TGTATGAATGAGAGCTGTAAGAAGGATTTTTATTTGTTATAATTTAGTTACCATTTTCAGTGTTATTTT  
AAAGGTTCTTTGAAGAATTTTGGGGCAGGGCATCAGATTAGAGTTTTAAAATTTGAGTATTTTGGATATC  
AGTGTTCCCTCATGAAGATATACATGGATATTCAATTTTGATGGCTTCCAGATTTGTAAGATTGTATGTTG  
TATATACCATTCTATTAAGAAACATGTCCACTGTGCTTTCAAACATAGATAAAGCATGATAAAGATTATT  
ATTTAAGATATACTTGTATTTATACCTCAGATATTCTTTGGGTTTTGTACCTCAAGGCTTTTTTCTTCT  
TATTGTAAATACACTTTACGTGAATACAGTCTAAGTGAAGAAAATAAATAAAAGGAAGAGGTTTATAACT  
TGCTCTATATCTGTACAGATTATAATCAATAAGTGCACTATTATTAAATGTTTAAAGTAAGGGAAAAGTC  
TGGGCTGCCTTCCTTAATATTGCATCTCACTCCCACCCTTAAACCACAGATTGCAAAGCATAGCATTTT  
AGCATCAACTACAATCAAAGAGCGATTTGCTGAAGGAAAAATCGGACTGCAAATCATTCCAAGGCCAAA  
CTGCAACTGAGCCACCCACTCCCAAACAGGAAACCCTGGTGAAGGTTTCAGGAAGCACGGAGATTCTCTCC  
AACAAAGGTCCAGTTAGGAAACGACGCTGAGAGGATGACGACAACGTGCAACAGCAGAAAGATGCTTGCA  
AGCAGAGTCAGGGTCACCAGTGAATGCCACAAAAGTTCTTTCCCACTGTTTAATTTGACAAGAGAAGA  
ATTTGAAGGATATGAACATTTTCAAGAACTCTGCTGAGGTCACCTAGAGCGCCATCACAACCTATTTGTG  
TGAATAATTGCCTAGATTGTAAGCTCTTTGAGGGCAGGGCTTGCTCTTACACATCTTTATAATCCCCTG  
CAGCGGCTTTCAGTATTTTGTACTTGTAGGCACCTAATAAATTTATTATTTGCTATACTGAA

>NM\_006145.3 Homo sapiens DnaJ heat shock protein family (Hsp40) member B1 (DNAJB1), transcript variant 1, mRNA

GGAGCCGGGGACGGCGACAGCGGGTCGGCGGGCCGCAGGAGGGGGTCATGGGTAAAGACTACTACCAGA  
CGTTGGGCCTGGCCCGCGGCGCTCGGACGAGGAGATCAAGCGGGCCTACCGCCGCCAGGCGCTGCGCTA  
CCACCCGGACAAGAACAAGGAGCCCGGCGCCGAGGAGAAGTTCAAGGAGATCGCTGAGGCCTACGACGTG  
CTCAGCGACCCGCGCAAGCGCGAGATCTTCGACCGCTACGGGGAGGAAGGCCTAAAGGGGAGTGGCCCCA  
GTGGCGGTAGCGGCGGTGGTGCCAATGGTACCTCTTTCAGCTACACATTCCATGGAGACCCTCATGCCAT  
GTTTGCTGAGTTCTTCGGTGGCAGAAATCCCTTTGACACCTTTTTTGGGCAGCGGAACGGGGAGGAAGGC  
ATGGACATTGATGACCCATTCTCTGGCTTCCCTATGGGCATGGGTGGCTTCACCAACGTGAACTTTGGCC  
GCTCCCGCTCTGCCCAAGAGCCCGCCGAAAGAAGCAAGATCCCCCAGTCACCCACGACCTTCGAGTCTC  
CCTTGAAGAGATCTACAGCGGCTGTACCAAGAAGATGAAAATCTCCACAAGCGGCTAAACCCCGACGGA  
AAGAGCATTCGAAACGAAGACAAAATATTGACCATCGAAGTGAAGAAGGGGTGGAAAGAAGGAACCAAAA  
TCACTTTCCCAAGGAAGGAGACCAGACCTCCAACAACATTCCAGCTGATATCGTCTTTGTTTTAAAGGA  
CAAGCCCCACAATATCTTTAAGAGAGATGGCTCTGATGTCATTTATCCTGCCAGGATCAGCCTCCGGGAG  
GCTCTGTGTGGCTGCACAGTGAACGTCCCCACTCTGGACGGCAGGACGATACCCGTCGTATTCAAAGATG  
TTATCAGGCCTGGCATGCGGCGAAAAGTTCCTGGAGAAGGCCTCCCCCTCCCCAAAACACCCGAGAAACG  
TGGGGACCTCATTATTGAGTTTGAAGTGATCTTCCCCGAAAGGATTCCCCAGACATCAAGAACCGTACTT  
GAGCAGGTTCTTCCAATATAGCTATCTGAGCTCCCCAAGGACTGACCAGGGACCTTTCAGAGCTCAAGG  
ATTTCTGGACCTTTCTACCAAGTTGTGGACCATGAGAGGGTGGGAGGGCCCAGGGAGGGCTTTCGTACTGC  
TGAATGTTTTCCAGAGCATATATTACAATCTTCAAAGTCGCACACTAGACTTCAGTGGTTTTTCGAGCT  
ATAGGGCATCAGGTGGTGGGAACAGCAGGAAAAGGCATTCCAGTCTGCCCCACTGGGTCTGGCAGCCCTC  
CCGGGATGGGCCCACATCCACCTCCAGTCCCTGGCCAGGGGTGAGAGGCAGACCAGCAGATGGACTTGAT  
CCCTCTGTGTCTTTTTGCTTCTGGCTGGTAGATAATGTCAACCTGCAGTCTTGATTCCCAGACCCTGTAC  
ACTCCTCCTTTTCTGTTGTGTGATCAGTTTGTGCTTTATTCTGTATTTGTCTCCCATGTCTTGCTCTTCT

CCTGGAGAATTCTGTCTTCTCTTTGGCCATCTCAAATTGAGAACCTAAACTATTCCTGCAGAACTGCCTG  
GTTGGCGTCCACAAGCAATACCTCTCGTTCCAGCAGGACCAAGGGAGCCAGCCTCCAGTGAGTGACTCCA  
GCAAGTGCAGCCACCTCTCCCTTGATGGTCTGGGAGCCTGGCCTCAGCAAGGGGCCTTCCTGACCTCTGG  
CTCCAGTGAAGCTGAATGTCCTCACTTTGTGGGTCACACTCTTTACATTTCTGTAAGGCAATCTTGGCAC  
ACGTGGGGCTTACCAGTGGCCCAGGTAATTTTTTGTTCATGGACTATGGACTCTTCAAAGGGATCTGA  
TCCTTTTGAATTTGCACAGCCCTAGATACAATCCCTTTTGATAAAAGGGTCTTTGCTTCTGATTACAGG  
AGCACTGTGGAACGTCTGTAAATATGTTTTATAATTCCATGTATAGTTGGTGTACACTCAAACCTGTC  
CCCGGCAGCCAGTGCTCTCTGTATAGGGCCATAATGGAATTCTGAAGAAATCTTGGGGAGGGAAGGGGAG  
TTGGAACAAATGTCTGTTCCCTGGAGGCCAGTCCAGTGCTCAGACCTTAGACTCATTGTAAGTTGCCAC  
TGCCAACATGAGACCAAAGTGTGTGACTAGTCAATGAAGTGCGACAGCATTAAAGACTGATGCTAAACCT  
CA

>NM\_012328.3 Homo sapiens DnaJ heat shock protein family (Hsp40) member B9 (DNAJB9), mRNA  
GAGGTGGTGGCGCCAGCGGCTACCTCCTGCCTGTGAGGAGCTGGCTGAGAGGGGACTGGGCGCCGGCGGG  
GAAGGAGGAGCGCTAGGTGGTGTACGACCGAGATTAGGGTGCCTGCCAGCTCCGGGAGGCCGCGGTGAG  
GGGCCGGGCCCAAGCTGCCGACCCGAGCCGATCGTCAGGGTCGCCAGCGCCTCAGCTCTGTGGAGGAGCA  
GCAGTAGTCGGAGGGTGCAGGATATTAGAAATGGCTACTCCCCAGTCAATTTTCATCTTTGCAATCTGCA  
TTTTAATGATAACAGAATTAATTCTGGCCTCAAAAAGCTACTATGATATCTTAGGTGTGCCAAAATCGGC  
ATCAGAGCGCCAAATCAAGAAGGCCTTTCACAAGTTGGCCATGAAGTACCACCCTGACAAAAATAAGAGC  
CCGGATGCTGAAGCAAAATTCAGAGAGATTGCAGAAGCATATGAAACACTCTCAGATGCTAATAGACGAA  
AAGAGTATGATACACTTGGACACAGTGCTTTTACTAGTGGTAAAGGACAAAGAGGTAGTGGAAGTTCTTT  
TGAGCAGTCATTTAACTTCAATTTTGATGACTTATTTAAAGACTTTGGCTTTTTTGGTCAAAACCAAAAC  
ACTGGATCCAAGAAGCGTTTTGAAAATCATTTCCAGACACGCCAGGATGGTGGTCCAGTAGACAAAGGC

ATCATTCCAAGAATTTCTTTGGAGGTGGATTATTTGATGACATGTTGAAGATATGGAGAAAATGTT  
TTCTTTAGTGGTTTTGACTCTACCAATCAGCATACAGTACAGACTGAAAATAGATTTTCATGGATCTAGC  
AAGCACTGCAGGACTGTCACTCAACGAAGAGGAAATATGGTTACTACATACACTGACTGTTTCAGGACAGT  
AGTTCTTATTCTATTCTCACTAAATCCAACCTGGTTGACTCTTCTCATTATCTTTGATGCTAAACAATTT  
TCTGTGAACTATTTTGACAAGTGCATGATTTCACTTTAAACAATTTGATATAGCTATTAAATATATTTAA  
GGGTTTTTTTTTTTTGACAAATTCAACATTCAACGAGTAGACAAAATGCTAATTATTTCCCTGATTAGGA  
AAGTTTCTTTAAAAAACACGTAATTTGCCTAGTGCTTTTCTCTACCTGCCCTGGGCTCACTAATATC  
ACCAGTATTATTACCAAGAAAATATTGAGTTTACCTGATTAACTTTAAAAGTTAATTGTAGATTTAAAT  
TGTGTGAACCTAATGATTTTTGCAGTGAAACCTTTACTAATTCAAAGTTGCATGTTCTATGACATCTGTG  
ACTTGCCTTGCAGAGTGTACATGAACTGTATAATTGAGTCATTCAAGTAAAGGAGAACAGTATCTTGGTT  
AATTGCTACTGAAAGGTTGAGAAAGGAATGGTTTGATATTTACCACAGCGCTGTGCCTTTCTACAGTAGA  
ACTGGGGTAAAGGAAATGGTTTTATTGCCCATAGTCATTTAGGCTGGAAAAAAGTTGAAAACTTAACGAA  
ATATTGCCAAGAGATTGTTATGTGTTGGTTCCAGCCTAAAAATGATTTGTAGTGTGAAATCATAGCT  
ACTTACATAGCTTTTTCATATTTCTTTCTTAGTTGTTGGCACTCTTAGGTCTTAGTATGGATTTATGTGT  
TTGTGTGTGTGTAGTTTATCCTCTCTCATCTTTATCTAGAGATTGACTGATACCTCATTCTGTTTGTA  
AAACCAGCCAGTAATTTCTGTGCAACCTTACTATGTGCAATATTTTAAATCCTGAGAAATGTGTGCTTT  
TGTTTTCGGATAGACTTATTTCTTTAGTTCTGCACTTTCCACATTATACTCCATATGAGTATTAATCCT  
ATGGATACATATTAACAAGTGTCTCATACAACATTGTATGTGAGAGAAATATAAATATTTACAACCTG  
ATATTCGTTGTTGTTTTATTGTTAAAAGTTTATTATGCAACTCTGGAGGTATAGAGGGCATATAAGCTAT  
GGGACATATGCTGATCACAGGCTATATTCATGAAGTTACTTTGACCAACCTGAAAACTGATAGGATTTT  
GTTTGTCAATTTGGTAATTTCTACTGCATTCTTACCATCCTTCTCTCACAAATTTTGATAGCTTGAAGATC  
TTTTTAATTATAATTTGTTGTATTTGTTTCCTAGGAGCAAGTGTCTGCTGCCAGTTCTTCTCTTT  
AGGCGTGGTTGAGAAAAAGCAGAACTTTACATAAAGCTGTATTTCTTAATCATCTTTAATTTGAAACTT  
AAGAAAATGAATTTATTCTGTTATTTATGTAACCTATTTCTGGAAGTTATATCTACTAGTTTTGTTT  
GATAATAATAAAATTAGCTATACCTTGAA

>NM\_018370.3 Homo sapiens DNA damage regulated autophagy modulator 1 (DRAM1), mRNA

ACTCTGGCCCCGGCAGCCTCGCCGCCCGCAGCCTCGCTCCGCTCCTCGCGCTTCCCCTCCCTCCGGGGCTG  
GGCCTGCCCCGGCCGTGCGGAGCCTCCCCTCCCACCGTCCGTGAGTGTACGCGCCCGGCCGCCGCCTCC  
AGGCAGCCCGGAGCAACCCGGCGCCCGGCCCGCTGGGCGCAGCACTCCGTCGGCGGGCGGGCGGGCGCG  
ATGCTGTGCTTCCTGAGGGGAATGGCTTTCGTCCCCTTCTTGGTGACCTGGTCGTCAGCCGCCTTCA  
TTATCTCCTACGTGGTCGCCGTGCTCTCCGGGCACGTCAACCCCTTCTCCCGTATATCAGTGATACGGG  
AACAACACCTCCAGAGAGTGGTATTTTTGGATTATGATAAACTTCTCTGCATTTCTTGGTGCAGCCACG  
ATGTATACAAGATACAAAATAGTACAGAAGCAAAATCAAACCTGCTATTTCAGCACTCCTGTTTTAACT  
TGGTGTCTTTAGTGCTTGGATTGGTGGGATGTTTCGGAATGGGCATTGTCGCAATTTTCAGGAGTTAGC  
TGTGCCAGTGGTTCATGACGGGGGCGCTCTTTGGCCTTGTCTGTGGTGTCTGTACACGCTCCTACAG  
TCCATCATCTCTTACAAATCATGTCCCCAGTGGAACAGTCTCTCGACATGCCACATACGGATGGTCATCT  
CTGCCGTTTCTTGCGCAGCTGTCATCCCCATGATTGTCTGTGCTTCACTAATTTCCATAACCAAGCTGGA  
GTGGAATCCAAGAGAAAAAGGATTATGTATATCACGTAGTGAGTGCGATCTGTGAATGGACAGTGGCCTTT  
GGTTTTATTTTCTACTTCCTAACTTTCATCCAAGATTTCCAGAGTGTACCCTAAGGATATCCACAGAAA  
TCAATGGTGATATTTGAAGAAAGAAGAATTCAGTCTCACTCAGTGAATGTCGCAGGCCATTTCTAAAAGT  
GCTACAGAGGACAGACAGGGTTTTGAGGCCACCCTGATTATTGGGATGCATCTGCAGCACATCCAGGACT  
TGAATTCATTACGAGTTCCTAATAGTTGTATTTCTAAAGATGTGTTTCCTAGAGAATGTACAGCCTTAT  
GACACTGTAGTGATGTTTTTATAATTTCTAAGTAGATTTTTTATATTAACAAATTCATATACAGAAAA  
AATAAGGTGTTACAAAAAATGGAGAGCTCTATTTTTGTACAGATTCTGTCGTTTTTGTATTTGTGT  
GAGATTTATGGAAATACACTAAATGAGTAATTCAGGTTTCAGTACATTTATTACAAAGTGAAATCAGGGGA  
TATTCATTTGTAAATTTTATTCTTAGTGAATGAACTGTATAATTTTTTTTATCAGGAGAGCACTTATAAA  
ATTCAATTTATAAAGATCATATACCCAAATCATAAAGATTTAGTTGATACATTAACACTAAGATACTCTG

ATTTTtagccgaactaaacaaagtGCTTCTACTGAGAGGCCTTTATACCACCATGTACAGTAACTCTAAG  
TGAATACGGAAGACCTTGGTTTTGAAATTCTGCCACCTTGTTTCTCCCTGCTCATGAGGTCGCACCTTTT  
GCTCTTGCTGCTAATTGCCATTCTAGTGGGTGTAATGCCAGGTGGAATGGTTTCAACAAGTCAGGTGA  
AAACCATCCTTTATTGTTGCTGGCACAACCTTGATATATAGTCTGACTCAGAACTGAAGCTCACATCTCAA  
ATTCATTTTCATGCCAGTAAATGTGGCAAAGAGAAGAAAGGCCCAAGAGCGAGACAAGAAGAATGGAGAAG  
GGGGCAGCCAAGAAGAACTTCTGGGTTCAAGGGTACTGTTTATTTGCTCCTTCTTTCATGCCTGTGGCTG  
GATGTCCCACAACACTATAAGAAATATAAGTCAAGCCCTTGTTGTTAAGCAAGAACTACAGACTCCATCT  
TTTCACCCAAATCATGAATGACCAATAAAAAGCAAGTTATTCCAGAGGAAGAAGCAGCCCTTGAAATGTT  
AAGGCTTAGGCTTGAAAGGTGAAGAGCAGGAATTCTCTTTCAAATCCTAGAGCATAAACCCATGTGTG  
GCCAAGTGAGATCAGCCCTCAAGGGCACATGCCAAGGGCAGAGCAGCCCATGTAGACAGCTTCGGAGGGC  
ATGGGGGTGTAGGGAGTTCGGGGTAGCTCCTCATTAACATTTGTTGGGTGAGTAAAGGGGTGAGGCTCA  
GTGGCAGGTACCTCTGCAATGACAAGCTGCCTCCCCTCTATGTGTTTAGCATATGTTATTAGAACATGTC  
CGACACCCCTACCGCTGCCATTTGGGCCCTTTAATAAAGCCAAGTAGAGAAATCTGGCAATAAAAGGCAA  
ATGTAAGCATGCTTTCTTTAAGACGCATCATAAATGGTTTTCTTTAAGTGAATGGAAGAGTTTGACAGAG  
ATACACCTTTGTAAGAAAACATTAAGAATGCTGGCTGGCTGTGGTGGCTCACACCTGTATTCCCAGCACT  
TTGGGAGGCCTAGGCAGGAGGATTGCTTGAGCCTGGGACTTCGAGACCAGACTGGGAAACATGGCAAAAT  
CCCATCTCTACAACAAAAATACAAAAATTAGCCAAGTGCGGTGGTGTGCCTGTAGTCCTAGTTACTTGGG  
AGGCTGAGGTGGGAGAATCACCTGAGCCCAGGAGGTGGAGGCTGCAGTGAGCCATGCCAATGCACTCCAG  
TCTGGGCAACAGAGTGAGACCCTGTCTCAAAAATAAATAAATAAATAAATGAATAAAGAGAATGCTAATC  
ATTTCTGGGTTCACTGCGACTCACTGTAGTGCTGGGGATCCCCCTGTAACACTGGAAGTAAAGACAGT  
GATGAAAGCTATGTCAAGCATTATTCTGAAGAGGAGGAGAAATGCCACATACCTTTCCCATGGGAC  
CTGTGGTGGAATGAATCCATACTTCTGCCTCACTTCGAGCAGACTTTTGTTCTCGGCGCTCCTCACGATG  
GAGTTTCATGCTTCATTTTCACATCTCTCTGCACAATTAGATTGGGAGCTCCTTGAGGGCAGAGTACGTG  
CCTTAATCTTTATCTTTGTAATGCCACAATGAACAGAGTGCCTCCTGGTACACTGTAGGAGCTTAAGAAA  
TACTCACTGAATGCATGAATGAATGAATGAACAAATGAAGGAATGACTAAGGATGTTTGTAGTGCTATAA

TATAGAATGGGATTTACTCTGCTTTACCAGTTAGTTTCATAATAAACAAATAGTCTGTA

>NM\_014674.3 Homo sapiens ER degradation enhancing alpha-mannosidase like protein 1 (EDEM1), mRNA

AAAGGGGAAGCGAGCCGGGCTACGGGGCGAGCGGGGTGCGGTGGTCGGCGGGGAGGCCCCGCGCTTT  
AAAATAATGCCCGCGGCGCCGCGGACCATGCAATGGCGAGCGCTCGTCCTGGGGCTGGTGCTCCTCCG  
GCTTGGCCTCCATGGAGTATTGTGGCTCGTCTTCGGGCTGGGGCCCAGCATGGGCTTCTACCAGCGCTTT  
CCGCTCAGCTTCGGCTTCAGCGTCTGAGGAGCCCCGACGGCCCCGCGTCGCCACCTCGGGGCCCCGTGG  
GCCGGCCTGGGGGGGTATCCGGGCCGTCTGTGGCTGCAGCCGCCGGGGACCGGGGCAGCGCAGAGCCCCGCG  
CAAGGCTCCGCGGCGTCTGGGCCGGGGATGTGCGGCCAGCCAATGGGGCTACGTGCTGGGCGGCCGG  
GGCCGCGGCCCGGACGAGTACGAGAAGCGCTACAGCGGCGCCTTCCTCCGAGCTGCGTGCCAGATGC  
GCGACCTGGCACGGGGCATGTTCTGCTTTGGCTACGACAACCTACATGGCTCACGCCTTCCCCAGGACGA  
GCTCAACCCCATCCACTGCCGCGGCCGTGGGCCCCGACCGCGGGGACCCTTCAAATCTGAACATCAATGAT  
GTACTAGGGAACACTACTCATTGACTCTTGTTGATGCATTGGATACACTTGCAATAATGGGAAATTCATCCG  
AGTTCCAGAAAGCCGTCAAGTTAGTGATCAACACAGTTTCATTTGACAAAGATTCCACCGTCCAAGTCTT  
TGAGGCCACGATAAGGGTCTGGGAAGCCTCCTTTCTGCTCACAGAATAATAACTGACTCCAAGCAGCCC  
TTTGGTGACATGACAATTAAGGACTATGATAATGAGTTGTTATACATGGCCCATGACCTGGCGGTGCGGC  
TCCTCCCTGCTTTTGAAAACACCAAGACAGGGATTCCATATCCTCGGGTGAATCTAAAGACAGGAGTTCC  
TCCTGACACCAATAATGAGACATGCACAGCGGGAGCCGGTTCCTCCTGGTGGAATTTGGGATTCTGAGT  
CGACTCCTGGGGGACTCCACATTTGAGTGGGTGGCCAGACGAGCAGTGAAAGCCCTTTGGAACCTCCGGA  
GCAATGATACAGGATTACTAGGCAATGTCGTGAACATTCAGACGGGCCACTGGGTTGGAAAGCAGAGTGG  
CCTGGGTGCCGGGCTGGACTCCTTCTATGAATACCTCTTGAAATCTTACATTCTTTGGAGAAAAAGAA  
GACCTAGAAATGTTTAATGCTGCATATCAGAGTATTCAGAACTACTTAAGAAGAGGGCGGGAAGCCTGCA  
ATGAAGGAGAAGGAGACCCTCCACTCTATGTCAACGTGAACATGTTCAGTGGGCAGCTGATGAACACCTG

GATTGACTCTCTGCAGGCCTTTTTCCCTGGACTGCAGGTGCTGATAGGAGATGTGGAAGATGCCATCTGC  
CTTCATGCCTTCTACTATGCCATATGGAAACGATATGGTGCCCTCCCTGAGAGATATAACTGGCAGCTGC  
AGGCCCTGACGTTCTTCTACCCACTGAGACCAGAGTTAGTGGAATCCACATATCTCCTCTACCAGGC  
AACCAAGAATCCCTTCTACCTCCATGTAGGAATGGATATTCTGCAGAGTCTGGAAAAGTACACAAAAGTC  
AAGTGTGGGTACGCCACGCTGCATCACGTCATTGACAAGTCCACAGAAGACCGGATGGAGAGCTTCTTTC  
TCAGTGAGACCTGTAAATATTTGTATCTGCTGTTTGATGAAGACAATCCAGTACACAAGTCTGGAACCAG  
ATACATGTTCAACAGAGGGACACATTGTATCTGTGGATGAGCATCTTCGGGAATTGCCATGGAAGGAA  
TTCTTCTCTGAAGAGGGAGGGCAGGACCAAGGGGGAAAGTCTGTGCACAGGCCGAAACCTCATGAGTTAA  
AAGTCATCAACTCCAGCTCCAACGCAATCGTGTACCTGATGAGAGGAGGTACTCCCTGCCCTTAAAGAG  
CATCTACATGCGACAGATTGACCAGATGGTTGGTTTGATTGATCTGCTCTCTGTGAGGCCTCATCTTGA  
ACCAGACCTTAACGACCAAACCCAGACCATGCCAAAGTCCAGTCTGAAATGAAAGGGGACAGAAGTCTTG  
CTGTCCATGGTGGTGTAGGAATTTCTGTGCAACACCTCACCACGTCTGGTTAATCCTTGCACACTTCAGT  
GTTTCTCTCCTGTTCAATAAAATGCCCTGTTAAGGATATAATTTGAAGTGAGAAGATACATGGAAATTGC  
CCTCTTATGACATGTTGATGTTATAAGCACAATAGATGGGGCATCTTTGGATTGATGTTACAGCTTTAT  
ACTTCAGAACCTAAGTCTCTTCACTTTGCTGGCACCTGCTATACTGGAGTATTGCTATGTCTTTAAAAAA  
TTTTTTTTATTATATTTATTTTTTTGAGACAGGGTCTTGATATTTTTTTGGGACAGGGTTACCTGGGCT  
CAAGTGATCCTTCTGCCTCAGCCTCCCGAGTAGCTGGGATTACAGGTGAGCACCCTGTACCTGGCTAGC  
TACTTCTTTGTTAGAGGATTGAGAATGAAATTTCTGCAAAAGGGCCCATGGTTCATTTGGTATCCCTATT  
TAATTGCATTGAAAATGTCATCCTTTCTGTTGTTAGATAATTGGGGTCTTCCCCTGATATCCAACCGTGA  
TTTTGGATCACATGGGAGAAAAAGTCATCCAGTTTTTCATGTTTGCCTCAAGTAATCTTTACAGTGTTAC  
AAATTATTTGCTTAAGAAGAATGGTCTTAACCAGAATTCTTAACAGATAGTCTCTTAGGTTATTATGTTA  
TGGTCTAAGAGGTTAACTGACATCTTTGGGTGGTATTTGCATTTTGAATATGAACTTACCTGAGGAAC  
TCCCATAGTTCCAGAATCAGGTGCCTTTTAGGGAGAGACAATACTAAGATTGTCTGAGCTTCCATCTT  
TCTCATATTTCTAAGCAAGGATTCTCACTTCTGACCATATTTGGGTAGAGTTCTGTTTTGTTTCTGTT  
TTCTGTGTCTAGTGCCAATTAGCTAAATCAGGGAGAAAGAAATGATCACATGACTTTTAGCATCCTTGAG

CCATTTCTCTGTGTAATACAGGCTTTAGATTAGTGCCTTATATTGGTTTTGGTTTGGGGCACTGGATGTC  
GCAGCTACTGCTATGGTTTCAGGAGGCCTGTTTAGCCACATGGTGAGACCGTGGTGAAAGGGGGATGGAA  
ATTGCTTGCCAGTCTTGCCTTTCATCCTGTAAAAGTAAGCATGTAGAAGGAGGAAGTTGTGCTAAAAT  
GCCTTGTTTTTTTGTATTATTTTCTTAGCCAGAACATCTCTCTTGAACCTCACACTGATACACACCTG  
CTACTCTTACACAGTGCAGCAGGGTTGACTCTTAGTCTGGCTTCCATGAAGCGTCATGGGTGGAAACGCA  
TTCTAGTAAAAAAGGTAGGAAATCCCTAAACTTCCAGCCTCACATAGCACGGTTCTCACCTGTCACTGT  
TTCCACCTCTAAGGATTTTATGTACATCTTTTCAAAGCTAGAAATAAGCACTGTCTAAGTTTATGTTG  
CATTTTTAGTCAAAAGGGAGAAATCTTATTCCTTCTTGAAAATTTTAAGTGTTATGGTTTTATATAGTTC  
AGTTCTTTGAGATTTTTGAAAAGAGTATTTTCAGTAATAAACGTGCCATCTCTATCTCTTAAACATTTAT  
TACAACAATTGTTTTAAATAGAAAAAATAAAATGCTTCTATTTTACCTTTTTTCATTTCAGAAGCATT  
TTCTGTTTATTAACAGTGTCCCATCTACTGAATAGAAAACCTTGAGAATAATATATATATATATTTTTAA  
TGTTTTCACTGACTCATTGAAAATGTTAATTACACACACATGCATGCATGCACACACGAGCATACTTGTA  
CCTTTGTCTCTGGGCAAACAGGTGGGACTGTTAGTGACCCATTTGGGAAAATAGAGCATCTCAGAGAAGG  
AGGTGAGTTCTTCTGCCTGTGATTTCTTGGCGCTCCCTCCTCTCCCGCTCTGGCTTCTGTGGCGGC  
AGTGGTGGGTAAGCACTCCAGTGTTCTCTTAATGAGGCACTTGCCTGTCACTCGAGCAAGCCTGGGTGT  
TCCTTCCTCCTCATGCTCCTGGAATAGGGAATAGGGATCTCATGCTTGCAAACCTACACAATGCTGCAGGT  
GCTTCCAGGGGGCCACAGGCTGTCAGGAAACGTGTTTTATGTTAAGTCACAAACCCACTTGACTTCTGGG  
TACTGGAATTAATACCAAGTGGGTGAGACTGAGGGTGAGTGAGTTAGTACATATTAATCCTGGTTGTTGAG  
CTTCCAGACTACCCCGTCCAAAGTTTGATGCTATGTAGTCAGTGGTTTGTGGGGCTGGATGCCAGAAGGT  
TCTTTGAGCCAGTTTCAAAGGTTACTTGTTTTTTTTTTTTTTTTTAAAGTCAGAATGTTAACAGCTGTG  
ATATATCCTGCAGGGCTTTTGCAGTTTCTTCTGTTCTGTGTTCTGAAATACTGGGTAGAGAATGGCTGAG  
GAGGAGATTACCAGAGAAGTTGCTTGTCTAGTGCTTGTCCCAGGATTGCCTCAAATCTGAGTGGACTT  
CATCCTTTGCGGCGGCTCTGAGCCTGGCCCATCTTCTATTCCACGTGTAGCTAGTGTCTAGTGTGAGC  
TTTGCTCAGTGTGGTGAAACATTTTGCAGAACTGTTGTAGAAAGCTGCCTTATAGTTGGCTTGACAAAG  
CATAATTCTCTCATAACAACTTTCAAATCATTACAGTAGCTTAGCTACTTTAGTTGATGTGACCGAGGA

ATCCCTTCTAGAATCATAGGTGGCAAGGGAGGGTTTGCTAGCTCTCCATTTGCACTGGCCATTGTGAAAA  
ACCAGCTTCTGTATTCAAATCTTTCCTTCATTTTTTTAAATTTTTTTTTTGGCAGCGCTTGTGCTGGAAC  
TACTCATTGTAAGTGAATCCTCAGGGCTTTTCTTGTTTTAGATCATGGACTGTGCACGTGACACTTAAA  
TAATTTTCTATGTATTTAAAGAAAAATGCACCAGGATGGTGTCTGTGCACGTGACTATTAGAGGAGCGTC  
TGTAAGAAGTACCTGGTTTGGTCAGTGCAGTTGTGCAATCTGAGGGCCTTGTTTCCTCCTCCCTTTCCCC  
TTCTCCCCACCAAAGGAAAATATCCCTCTTAATGATTTTCGTAGTTCAGTTTACTGAATGATTACCACCTG  
TAATTCCTCTTTGGATTGTGTAGACTCAACATGAGACATTCCTTTCTGCTTTCTGGAGGGCACCAGGGGC  
CTTCTCTTTGATAAATTTTTTTGTCTGTTGACAAAAACAAAATCTTTTTTCAAATGTAGTGCTGGTG  
AAAAGGTAGGGCTGAGTGATTACCTTAGCCACAGGGTGGCTGAGCAGGAACTTTAGAAGAAAAATCCTGAG  
CTTTCCTGTCCATTCCCAGCATCCAGCTCCTATTCTAGTGCCTCTTCCCTGCAGGGCAGGGACCCCTTGG  
GAAATCGAGGAGGTGGGACGGGCTGGGCCCTGTGTCCCAGGTTTCACAGGGCTCAGGGTTATGCTCCCGC  
TTGAATCTGGACGTGAATCTGGTAAAAATATCAAGTACCTGTGGAACCTCCTGATTCTATACCCTCTTCC  
TTCTTTCTGCAAGGCAGAGGAATAATTTTTAAAGGTATTTTGTTTTAGTTTTAAATAGCAAAACACA  
AGCTGCATTTTTATTTATTTTGCATAAGAAAGGTAAATCTTTTTACAAAAAAAAGTATAGAGTTGGAAC  
TCTGGGAAAACCTACGGAAATACACAAATGCTTCTCTGTAATGTGCAATATGCTTTGCAACTGTAGATGA  
TATTTTATGTTAATCTGTAAATAAGAAATGTATTTAAATTTAAAGGGATCTTTTGTAAGGACCAAA  
TGTTCTTTTATAAATGTAATAAGGAATATCTTGCTCTTTAAATTTATTAGGATTTTATGAGTAATTTT  
TATTAAGATTTCTTTTTTTGA

>NM\_001961.4 Homo sapiens eukaryotic translation elongation factor 2 (EEF2), mRNA

CTCTCCGCCGTCGTCGCCGCCATCCTCGGCGCGACTCGCTTCTTTCGGTTCTACCTGGGAGAATCCACC  
GCCATCCGCCACCATGGTGAACCTCACGGTAGACCAGATCCGCGCCATCATGGACAAGAAGGCCAACATC  
CGCAACATGTCTGTCATCGCCACGTGGACCATGGCAAGTCCACGCTGACAGACTCCCTGGTGTGCAAGG

CGGGCATCATCGCCTCGGCCCCGGGCCGGGAGACACGCTTCACTGATACCCGGAAGGACGAGCAGGAGCG  
TTGCATCACCATCAAGTCAACTGCCATCTCCCTCTTCTACGAGCTCTCGGAGAATGACTTGAAC TTCATC  
AAGCAGAGCAAGGACGGTGCCGGCTTCCTCATCAACCTCATTGACTCCCCGGGCATGTCGACTTCTCCT  
CGGAGGTGACTGCTGCCCTCCGAGTCACCGATGGCGCATTGGTGGTGGTGGACTGCGTGTCAGGCGTGTG  
CGTGACAGACGGAGACAGTGCTGCGGCAGGCCATTGCCGAGCGCATCAAGCCTGTGCTGATGATGAACAAG  
ATGGACCGCGCCCTGCTGGAGCTGCAGCTGGAGCCCGAGGAGCTCTACCAGACTTTCCAGCGCATCGTGG  
AGAACGTGAACGTCATCATCTCCACCTACGGCGAGGGCGAGAGCGGCCCCATGGGCAACATCATGATCGA  
TCCTGTCCTCGGTACCGTGGGCTTTGGGTCTGGCCTCCACGGGTGGGCCTTACCCTGAAGCAGTTTGCC  
GAGATGTATGTGGCCAAGTTCGCCGCCAAGGGGGAGGGCCAGTTGGGGCCTGCCGAGCGGGCCAAGAAAG  
TAGAGGACATGATGAAGAAGCTGTGGGGTGACAGGTACTTTGACCCAGCCAACGGCAAGTTCAGCAAGTC  
AGCCACCAGCCCCGAAGGGAAGAAGCTGCCACGCACCTTCTGCCAGCTGATCCTGGACCCCATCTTCAAG  
GTGTTTGATGCGATCATGAATTTCAAGAAAGAGGAGACAGCAAACTGATAGAGAACTGGACATCAAAC  
TGGACAGCGAGGACAAGGACAAAGAAGGCAAACCCCTGCTGAAGGCTGTGATGCGCCGCTGGCTGCCTGC  
CGGAGACGCCTTGTTGCAGATGATCACCATCCACCTGCCCTCCCCTGTGACGGCCCAGAAGTACCGCTGC  
GAGCTCCTGTACGAGGGGGCCCCGGACGACGAGGCTGCCATGGGCATTAAAAGCTGTGACCCCAAAGGCC  
CTCTTATGATGTATATTTCCAAAATGGTGCCAACTCCGACAAAGGTCGGTTCTACGCCTTTGGACGAGT  
CTTCTCGGGGCTGGTCTCCACTGGCCTGAAGGTCAGGATCATGGGGCCCACTATACCCCTGGGAAGAAG  
GAGGACCTCTACCTGAAGCCAATCCAGAGAACAATCTTGATGATGGGCCGCTACGTGGAGCCCATCGAGG  
ATGTGCCTTGTTGGGAACATTGTGGGCCTCGTGGGCGTGGACCAGTTCCTGGTGAAGACGGGCACCATCAC  
CACCTTCGAGCACGCGCACAACATGCGGGTGATGAAGTTCAGCGTCAGCCCTGTTGTCAGAGTGGCCGTG  
GAGGCCAAGAACCCGGCTGACCTGCCAAGCTGGTGGAGGGGCTGAAGCGGCTGGCCAAGTCCGACCCCA  
TGGTGCAGTGATCATCGAGGAGTCGGGAGAGCATATCATCGCGGGCGCCGGCGAGCTGCACCTGGAGAT  
CTGCCTGAAGGACCTGGAGGAGGACCACGCCTGCATCCCCATCAAGAAATCTGACCCGGTCGTCTCGTAC  
CGCGAGACGGTCAGTGAAGAGTCGAACGTGCTCTGCCTCTCCAAGTCCCCCAACAAGCACAACCGGCTGT  
ACATGAAGGCGCGGCCCTTCCCCGACGGCCTGGCCGAGGACATCGATAAAGGCGAGGTGTCCGCCCGTCA

GGAGCTCAAGCAGCGGGCGCGCTACCTGGCCGAGAAGTACGAGTGGGACGTGGCTGAGGCCCCGAAGATC  
TGGTGCTTTGGGCCCCGACGGCACCGGCCCAACATCCTCACCGACATACCAAGGGTGTGCAGTACCTCA  
ACGAGATCAAGGACAGTGTGGTGGCCGGCTTCCAGTGGGCCACCAAGGAGGGCGCACTGTGTGAGGAGAA  
CATGCGGGGTGTGCGCTTCGACGTCCACGACGTACCCCTGCACGCCGACGCCATCCACCGCGGAGGGGGC  
CAGATCATCCCCACAGCACGGCGCTGCCTCTATGCCAGTGTGCTGACCGCCCAGCCACGCCTCATGGAGC  
CCATCTACCTTGTGGAGATCCAGTGTCCAGAGCAGGTGGTCGGTGGCATCTACGGGGTTTTGAACAGGAA  
GCGGGGCCACGTGTTCGAGGAGTCCCAGGTGGCCGGCACCCCCATGTTTGTGGTCAAGGCCTATCTGCCC  
GTCAACGAGTCCTTTGGCTTCACCGCTGACCTGAGGTCCAACACGGGCGGCCAGGCGTTCCCCCAGTGTG  
TGTTTGACCACTGGCAGATCCTGCCCCGAGACCCCTTCGACAACAGCAGCCGCCCCAGCCAGGTGGTGGC  
GGAGACCCGCAAGCGCAAGGGCCTGAAAGAAGGCATCCCTGCCCTGGACAATTCTGGACAAATTGTAG  
GCGGCCCTTCCTGCAGCGCTGCCGCCCCGGGGACTCGCAGCACCCACAGCACACGTCCCTCGAATTCTC  
AGACGACACCTGGAGACTGTCCCGACACAGCGACGCTCCCCTGAGAGGTTTCTGGGGCCCCGCTGCGTGCC  
ATCACTCAACCATAACACTTGATGCCGTTTCTTTCAATATTTATTTCCAGAGTCCGGAGGCAGCAGACAC  
GCCCTCTTAGTAGGGACTTAATGGGCCGGTCGGGGAGGGGGAGGCGGGATGGGACACCCAACACTTTTTTC  
CATTTCTTCAGAGGGAACTCAGATGTCCAACTAATTTTAACAAACGCATTAAGAGGTTTATTTGGGTA  
CATGGCCCCGAGTGGCTTTTGCCCCAGAAAGGGGAAAGGAACACGCGGGTAGATGATTTCTAGCAGGCAG  
GAAGTCCTGTGCGGTGTCACCATGAGCACCTCCAGCTGTACTAGTGCCATTGGAATAATAAATTTGATAA  
GGTGGTGA

>NM\_013302.5 Homo sapiens eukaryotic elongation factor 2 kinase (EEF2K), mRNA

GCTCAACCTAGACCAGCCCCAGCTTCAGCCTCAGTCCCCCTCCTTCTGGATCGAGCGCCCGCACTCCCG  
GCCCTGCAGCCACCCGAGTCCCGCTCGCTGTCGCCTGCACGCGAGTCCCCCTGGCACGCGCTCCACAT  
CCCGGGATCGTCCCAACGGCCCCCTGCGCCCTTCTGGGATCACTCCGACTGCCCCGCGCGCCCTGGGATC

GGTCCATCTACCCCGCGTGGCCCCAGCTGCTTGCCCGGAGCGCCAGCTAGCGCTCCCCGCTCTCCGCTCC  
CCGGCACTCTCGGGGGGCCCCGCCCTGCACCCTGGAGCTCCGGGCCGCGAGCCTCTGCCAACTCCTC  
TGGACCCTCGCGGCCGTGGGCAGCGGCTGCCGCGCCTGTCTGCCCCAGGGAGGACCTTCGCCTCTGCATT  
TGTCCAGTAACTCTGGCTGTGCCGGATACTGCTTGGGTAAAACGGGCACCCCAGGAACATGGCAGACGAA  
GATCTCATCTTCCGCCTGGAAGGCGTTGATGGCGGCCAGTCCCCCGAGCTGGCCATGATGGTGATTCTG  
ATGGGGACAGCGACGATGAGGAAGGTTACTTCATCTGCCCCATCACGGATGACCCAAGCTCGAACCAGAA  
TGTCAATTCCAAGGTTAATAAGTACTACAGCAACCTAACAAAAAGTGAGCGGTATAGCTCCAGCGGGTCC  
CCGGCAAACCTCTTCCACTTCAAGGAAGCCTGGAAGCACGCAATCCAGAAGGCCAAGCACATGCCCCGACC  
CCTGGGCTGAGTTCCACCTGGAAGATATTGCCACCGAACGTGCTACTCGACACAGGTACAACGCCGTAC  
CGGGGAATGGCTGGATGATGAAGTTCTGATCAAGATGGCATCTCAGCCCTTCGGCCGAGGAGCAATGAGG  
GAGTGCTTCCGGACGAAGAAGCTCTCAACTTCTTGCATGCCCAGCAGTGGAAGGGCGCCTCCAACCTACG  
TGGCGAAGCGCTACATCGAGCCCGTAGACCGGGATGTGTACTTTGAGGACGTGCGTCTACAGATGGAGGC  
CAAGCTCTGGGGGGAGGAGTATAATCGGCACAAGCCCCCAAGCAGGTGGACATCATGCAGATGTGCATC  
ATCGAGCTGAAGGACAGACCGGGCAAGCCCCTCTTCCACCTGGAGCACTACATCGAGGGCAAGTACATCA  
AGTACAACTCCAACCTCTGGCTTTGTCCGCGATGACAACATCCGCCTGACGCCGAGGCCTTCAGCCACTT  
CACTTTTGAGCGTTCCGGCCATCAGCTGATAGTGGTGGACATCCAGGGAGTTGGGGATCTCTACACTGAC  
CCACAGATCCACACGGAGACGGGCACTGACTTTGGAGACGGCAACCTAGGTGTCCGCGGGATGGCGCTCT  
TCTTCTACTCTCATGCCTGCAACCGGATTTGCGAGAGCATGGGCCTTGCTCCCTTTGACCTCTCGCCCCG  
GGAGAGGGATGCAGTGAATCAGAACACCAAGCTGCTGCAATCAGCCAAGACCATCTTGAGAGGAACAGAG  
GAAAAATGTGGGAGCCCCCAAGTAAGGACCCTCTCTGGGAGCCGGCCACCCCTGCTCCGTCCCTTTTCAG  
AGAACTCTGGAGACGAGAACATGAGCGACGTGACCTTCGACTCTCTCCCTTCTTCCCATCTTCGGCCAC  
ACCACACAGCCAGAAGCTAGACCACCTCCATTGGCCAGTGTTCAGTGACCTCGATAACATGGCATCCAGA  
GACCATGATCATCTAGACAACCACCGGGAGTCTGAGAATAGTGGGGACAGCGGATACCCAGTGAGAAGC  
GGGGTGAGCTGGATGACCCTGAGCCCCGAGAACATGGCCACTCATACAGTAATCGGAAGTACGAGTCTGA  
CGAAGACAGCCTGGGCAGCTCTGGACGGGTATGTGTAGAGAAGTGAATCTCCTCAACTCCTCCCGCCTC

CACCTGCCGAGGGCTTCGGCCGTGGCCCTGGAAGTGCAAAGGCTTAATGCTCTGGACCTCGAAAAGAAAA  
TCGGGAAGTCCATTTTGGGGAAGGTCCATCTGGCCATGGTGCGCTACCACGAGGGTGGGCGCTTCTGCGA  
GAAGGGCGAGGAGTGGGACCAGGAGTCGGCTGTCTTCCACCTGGAGCACGCAGCCAACCTGGGCGAGCTG  
GAGGCCATCGTGGGCCTGGGACTCATGTACTCGCAGTTGCCTCATCACATCCTAGCCGATGTCTCTCTGA  
AGGAGACAGAAGAGAACAAAACCAAAGGATTTGATTACTTACTAAAGGCCGCTGAAGCTGGCGACAGGCA  
GTCCATGATCCTAGTGGCGCGAGCTTTTGACTCTGGCCAGAACCTCAGCCCGGACAGGTGCCAAGACTGG  
CTAGAGGCCCTGCACTGGTACAACACTGCCCTGGAGATGACGGACTGTGATGAGGGCGGTGAGTACGACG  
GAATGCAGGACGAGCCCCGGTACATGATGCTGGCCAGGGAGGCCGAGATGCTGTTACAGGAGGCTACGG  
GCTGGAGAAGGACCCGCGAGAGATCAGGGGACTTGTATACCCAGGCAGCAGAGGCAGCGATGGAAGCCATG  
AAGGGCCGACTGGCCAACCAGTACTACCAAAAGGCTGAAGAGGCCTGGGCCAGATGGAGGAGTAACCAG  
GAAAATCACTGCCGGCTAGTCCCAAGCAAACGGGCTAGGAGGAAAGATTAACAAAAACAACAACAACACT  
TATTTAGTTTGGGGAGGGGAAGCATTTTTAAGTGTGTTGTAAATCAAATTTATATTTTATTTTTTGAC  
TCTTGAAAAATGTCTTTGCTCCTTGGCAGCTACCAGCAGAGACTCTATAGCTGTCTCTTAGGGCAGTATT  
TTGGGGAAGTGGGGCTTGAAGAAGCAGCCTAATGAACCAACATACCGTTTTGTGTGTGGTTTTTTTTGT  
TGTTTGTTTGTTTGTTTGAGACAGAGTCTTGCTCTGTCACCCAGGCTGGAGTGCAGTGACATGATCTTA  
GCTCACTGCAACCTCCGCCTCCTGGGTTCAAGTGATTCTCCTGCCTCAGCCTCCCAAGTAGCTGGGATTA  
CTGGTGACACCACCACACTCAGCTAATTTTTGCATTTTAGTAGAGATGGGGTTTCACCATGTTGGCCA  
GGCTGGTCTCGAACTCCTAACCTCAGGTGATCCACCTGCCTCAGCCTCCCAAAGTGCTGGGATTACAGGT  
GTGAGCCACCATGCCTGCCATTTTGTGGTTCTATTTTCATTTTATTTCTTTTTTTTTTTTGTACGA  
GATATAAGAAAGTGCTTTTTGCCTTGAATGGACAATTTAGGGCTGTGCTCACTAGTCTTTTCAGGCTGG  
ACTGAAATGTCGGGCCCATGGAGCCCTGTGTTTTGTGCATCGGGATGAGAAATGAAGCACTTCACGCTGG  
CTTTCCTAAGTCACGGGGCGTGATTGCCGTGGCTTAGTGCAAAGCATTCTTCTCAGAGCATTTAGAGG  
CATGCGTGGCATTTTTTCAGTGGGTGTGAGATTGCACAATACCCAGGCTCCCTTCTACTGTGGGGAAGGG  
CCTGCATGTTGGCTGTTTTTAACTTCTAGTTCAATTTCTTCCATAATGCTACTGATTTTCTGGCATA  
CAGCCGAATTCCATCTTTTAAGCATGCTTTCTACGGTGGGCTTTTCAAACAGGTTTGAGTTTTGTATGC

ACACGTTTACTACCTCTAACTCCTACATCAGCTAGTGTGGAAGAGGGTGCACCTCAAAGCTTTTACACGT  
AAGGACAGCGGCTTGGAATGTGAGAGCCTTTTCTCCAAGCAGACCCACACTCTGCATCTCAGTGGCAGCT  
CCCACAACGTGACTGCAATGTCTCTTATACAGTATTCCTTGGTGTTTTCTTAGTGTCTGGATGTTCTTAC  
GTGAAATCTGCTCCCCAGCCCTGGTCCTTGGCATTCTTGCTTGAAGCTGGGCTGATTTTCTTGAATTT  
ACAGCAGGACGCTTTCAGCAGCAGTCTCTTGGGATTTTATCTAAGATGTTTGAGGATGAGAGGGCAAGAA  
CTATAAACACTCATTAATTCTAGTAGTCTCCCCATGGCCAGACAATGGCGATTGTTATTTAATGAGCTTT  
TCCTTTCAATGGAATTCAGCTCTCACATTAGTATGATTTCAATTTGATGTTCAAATAGCAAAGATGCTAG  
GTGCGGTGGCTCCCGCCTGTAATCTCAGCACTTTGAGGAGGGCCAAGGTGGGAGGATTGCTTGAGCTCAG  
GACTTCAAGACCAGCCTGGGTAAACATGGCGAGACCCTGTCTCTACCAAACAACAAAAAAGACAGAC  
TGCTTTGATCAACCCTAAATGCAAAAGCAGCCTATTTTTCTTTGTTTAAAAGTCAAAACATAAAAAAGCA  
GAGTATAACATACAAACCATTCTTAACTATTCATTAATAATGGGTCCTTCAACACCTTAGTGGGGTTTGT  
GTTGTTGCTTATGCAGAGAGATTATTTCTTTTTATTATTTTATAATTTTGAAATAGAGATGGGGTCTC  
ACTGTGTTGCCAGGCTGGTCTCGAACTCCTGGACTTAAGTGAGCCTCCCGCCTCAGTCTCCCAAAGCGC  
TGGGATTACAGGCAGGAGCCACTGAGCCCAGCCAAGACTTCAGTGTTGACTGCTTTGGAGGCACAAACCC  
ATGCAAGCGTTAGTTCCAAAGTTCAGTGTGTACCCTTAAATGAACAATGAAGCAGGTAAAATTACCCTTG  
AAAAAATCCCTTGGACCACCCATAAATGACAGTGACTTTTTCAATATGGACTCATCATAGCCAGTTTTTC  
CTTTGAAGTTGGAAGTATCACCTTTTGTCTCTGTACCAGATCAGTAGTTGGCTTGTGTTACATTTT  
GTGTGTGTGTGTGCGTGTTTTAAACCAGTGCATATAAATTGTATGTTAAATGTAAGTAACTTTAAGTTGA  
CTTATCTCTTCACAGTAATCAAGCCTCACGTAATTCATGCTTTTTAAATTCAGCCAGCCCCCTCTCTG  
AAATTTTATTATGTAAATAATTTGTGTTCCCTGATCACTCGTTTAAAGTTCTTAGTTGTATGTCATCTCTT  
CTCTAGCAGGAATTGGCAAACCTTTTTGTAAAGGGGTAGAAAGTGAAGATTTTAGGCTTTGCAGGCCATA  
TAGCCTCTGCTGCAAATGCTCAGCCCTGCTGTTGTAATGTAAAAGCTGCCACAGACACTACATGAACACG  
AATGAGTGTGGCTGGTGTCCAATAAACTTTATTTACACAAACGGGTGGCCCTTTTGGGCTGTAGTTTG  
TCAACCCTTGCTCTAACCTTGACTGAGAGCTACTTTATTAAGCCCTGAGGGCAGGAGCTATCCCAATTT  
TGTGTTCCCCAGGGCACCAAACACAGTGCTTTGGCATAGAGTAGGCACTCAACAAGTGTGTGAACAGAT

GGAGAGCCAGCCCTAGTCAGTGCACCTCACCCCTTGAGGCTCTGGTTCCTCCAAACAATGATTCGTTGTCT  
GGATTGGCTGGAAGTGTACCCCCGCAATTCTACTCCCCACCCACCCATGTGACCTTAATGTCAGTTGCT  
GGTCTGTTGCTCTTCGGGGAGGGAGAGATGGCCTGGATACAGAGCTAAGCAAATGCTTCTTTAAGGGCCC  
TTAAAAGTGAAAAGTAACTTGCAAGAGGTTGAGATCCTTCTGAGCTAGGAGAACTTATTCCACCTTCAAA  
ACCTAGTTTGGGCTGGGTGCAGTGGCTCACGCCACTTTGGGAGGCTGAGGTGGGCGGATCACCTGAAGTC  
AGCTACTCGGGAGGCTGAGGCAGGAGAATCGCTTGAACCCAGGAGGCAGAGGTTGCAGTGAGCCGAGATT  
GCGTCACTGCACTCCAGCCTGGGCGACAGAGTGAGACTCCGTCTCGAAACCAAAAAACAAGAAAAACCCCT  
AGTTTTGTGCCTTCTGAAGATAGTTAGGACATCTTCTTTTTCCGCAAATGCTGGACATGCCAAAAACCTA  
ACGCAAAACCCAGGACATTCCAGCCCACTGGGACGATATCAGAGACCATCTTCAAGTGCAAGAAGCAGG  
TGAAAGCCCAGGAAATTGGCAGAGCCAGGATTATCATCCAGTACTTTCATTTACAAATGGAGAAACCGA  
GGTTCTGCCAGCTAGATTTTTTTTACAGTGTCACTGCTAGCAAGCCACTAAGCTGGAGCTGGGATTGA  
GAGCTGCTGCTATTTAGAGGATCTTGGGAATAAAATTTAACTGGAGTTTAATGGCCCTTTCAGTTTTGC  
TATAGGCAAGAGAATAAAATGAATGAATGGATAGGTGGCTTATGGGTGTAAGAAAGAAGCGAAAAAAC  
TCCCAAACCCAGTGTTCTGAATATCTGTTCTCCCCCTGACCACTCTGGGAATTTATCAAATGCAGCTT  
TGACCTCCAAGCCAAGTAACTGCTCTTGTTGCTATTTTAGTGGTTTTTGTTTTTTAAGACACAAGGTC  
TCACTTTGTTACTCAGGCTGGAGTGCAGTGGCATGATCATAACTCATTGTAGGCTCAACCTCCTGGGCCC  
CAGTGATCCTCCTGCCTCAGCCTCTCAAGTAGCTAAACTACAGATGTGCACCATCACATCTGGCTAATT  
TTTTTTTTTTTTTTTTGAGGTGGAGTCTCGCTCTGTTGCCAGATTCAAGTGCAATGGCACGTTTTGGC  
TCACTGCAACCTCTGCCTCCCAGGTTCAAGCGATTCTCCCTGTCTCGGCCTCCCGAGTAGCTGGGACTAC  
AGGCACCTGCCACCACGCGCAGCTAATGTTTGTATTTTAGTAGAGACGGGGGTTTCACCATGTTGGCCA  
GGCTGGTTTCAAACCTCCTGACATTAGGTGATCCACCTGCCTCGGCCTCCCAAAGTGCTGGGATTACAGGC  
ATGAGCCACCGTGCCAAGCCACGCCTGGCTAATTTTTTAAATTTATTTTTTGAGAGACAGAGTTTCACT  
ATGTTGCCAGGCTGGTCTTGAACCTTGGCCTCAAGTGATCCTCCACCTCAGCCTCCCAAAGCATTG  
GGGTTACAGGCGTGAGCCACTGCACCTGGCCCTGTTTTCATGGCTTTTATTTCTTTTCATCCACACATT  
TGTCTGCAGTACTAGACATGTTTTACAAATCAACAAGTTTACACAAGTATATGCAGCTTGTTTTGGGGGG

AAAGGAGACAAAATATGCATATTTCTGTGTGGATTTGTGCCTCTTAATTGTGTTTCTAGTCTCTAAGGT  
GACCTTTAACCTACTCAAGATGGGGCCAGAGAAGTGGCCTGCGTTACAGATTTATTTTGGCATATGTA  
CTAAGTCCATTTTCTCTTTACAAATAAAGTGTTTTCTTTCTTTCTG

>NM\_005228.5 Homo sapiens epidermal growth factor receptor (EGFR), transcript variant 1, mRNA

AGACGTCCGGGCAGCCCCGGCGCAGCGCGGCCGAGCAGCCTCCGCCCCCGCACGGTGTGAGCGCCCG  
ACGCGGCCGAGGCGGCCGGAGTCCCGAGCTAGCCCCGGCGGCCGCCGCCAGACCGGACGACAGGCC  
ACCTCGTCGGCGTCCGCCCCAGTCCCCGCCTCGCCGCCAACGCCACAACCACGCGCACGGCCCCCTGAC  
TCCGTCCAGTATTGATCGGGAGAGCCGGAGCGAGCTCTCGGGGAGCAGCGATGCGACCCTCCGGGACGG  
CCGGGGCAGCGCTCCTGGCGCTGCTGGCTGCGCTCTGCCGGCGAGTCGGGCTCTGGAGGAAAAGAAAGT  
TTGCCAAGGCACGAGTAACAAGCTCACGCAGTTGGGCACTTTTGAAGATCATTTTCTCAGCCTCCAGAGG  
ATGTTCAATAACTGTGAGGTGGTCCTTGGGAATTTGGAAATTACCTATGTGCAGAGGAATTATGATCTTT  
CCTTCTTAAAGACCATCCAGGAGGTGGCTGGTTATGTCCTCATTGCCCTCAACACAGTGGAGCGAATTCC  
TTTGAAAACCTGCAGATCATCAGAGGAAATATGTACTACGAAAATTCCTATGCCTTAGCAGTCTTATCT  
AACTATGATGCAAATAAAACCGGACTGAAGGAGCTGCCCATGAGAAATTTACAGGAAATCCTGCATGGCG  
CCGTGCGGTTTCAGCAACAACCTGCCCTGTGCAACGTGGAGAGCATCCAGTGGCGGGACATAGTCAGCAG  
TGACTTTCTCAGCAACATGTGCGATGGACTTCCAGAACCACCTGGGCAGCTGCCAAAAGTGTGATCCAAGC  
TGTTCCAATGGGAGCTGCTGGGGTGCAGGAGAGGAGAACTGCCAGAACTGACCAAAATCATCTGTGCCC  
AGCAGTGCTCCGGGCGCTGCCGTGGCAAGTCCCCAGTGACTGCTGCCACAACCAAGTGTGCTGCAGGCTG  
CACAGGCCCCCGGGAGAGCGACTGCCTGGTCTGCCGCAAATTCGAGACGAAGCCACGTGCAAGGACACC  
TGCCCCCACTCATGCTCTACAACCCACACGTACCAGATGGATGTGAACCCGAGGGCAAATACAGCT  
TTGGTGCCACCTGCGTGAAGAAGTGTCCCCGTAATTATGTGGTGACAGATCACGGCTCGTGCGTCCGAGC

CTGTGGGGCCGACAGCTATGAGATGGAGGAAGACGGCGTCCGCAAGTGTAAGAAGTGCGAAGGGCCTTGC  
CGCAAAGTGTGTAACGGAATAGGTATTGGTGAATTTAAAGACTCACTCTCCATAAATGCTACGAATATTA  
AACACTTCAAAAAGTGCACCTCCATCAGTGGCGATCTCCACATCCTGCCGGTGGCATTAGGGGTGACTC  
CTTCACACATACTCCTCCTCTGGATCCACAGGAAGTGGATATTCTGAAAACCGTAAAGGAAATCACAGGG  
TTTTTGCTGATTAGGCTTGGCCTGAAAACAGGACGGACCTCCATGCCTTTGAGAACCTAGAAATCATAC  
GCGGCAGGACCAAGCAACATGGTCAGTTTTCTTGCAGTCGTCAGCCTGAACATAACATCCTTGGGATT  
ACGCTCCCTCAAGGAGATAAGTGATGGAGATGTGATAATTTAGGAAACAAAAATTTGTGCTATGCAAAT  
ACAATAAACTGGAAAAAACTGTTTGGGACCTCCGGTCAGAAAACCAAAATTATAAGCAACAGAGGTGAAA  
ACAGCTGCAAGGCCACAGGCCAGGTCTGCCATGCCTTGTGCTCCCCGAGGGCTGCTGGGGCCCGGAGCC  
CAGGGACTGCGTCTCTTGCCGGAATGTCAGCCGAGGCAGGGAATGCGTGGACAAGTGCAACCTTCTGGAG  
GGTGAGCCAAGGGAGTTTGTGGAGAACTCTGAGTGCATACAGTGCCACCCAGAGTGCTGCCTCAGGCCA  
TGAACATCACCTGCACAGGACGGGGACCAGACAACTGTATCCAGTGTGCCCACTACATTGACGGCCCCCA  
CTGCGTCAAGACCTGCCCCGCAGGAGTCATGGGAGAAAACAACACCCTGGTCTGGAAGTACGCAGACGCC  
GGCCATGTGTGCCACCTGTGCCATCCAACTGCACCTACGGATGCACTGGGCCAGGTCTTGAAGGCTGTC  
CAACGAATGGGCCTAAGATCCCGTCCATCGCCACTGGGATGGTGGGGGCCCTCCTCTTGCTGCTGGTGGT  
GGCCCTGGGGATCGGCCTCTTCATGCGAAGGCGCCACATCGTTGGAAGCGCACGCTGCGGAGGCTGCTG  
CAGGAGAGGGAGCTTGTGGAGCCTCTTACCCCAGTGGAGAAGCTCCCAACCAAGCTCTCTTGAGGATCT  
TGAAGGAACTGAATTCAAAAAGATCAAAGTGCTGGGCTCCGGTGCCTTCGGCACGGTGTATAAGGGACT  
CTGGATCCCAGAAGGTGAGAAAAGTTAAAATTCCCGTCGCTATCAAGGAATTAAGAGAAGCAACATCTCCG  
AAAGCCAACAAGGAAATCCTCGATGAAGCCTACGTGATGGCCAGCGTGGACAACCCCCACGTGTGCCGCC  
TGCTGGGCATCTGCCTCACCTCCACCGTGCAGCTCATCACGCAGCTCATGCCCTTCGGCTGCCTCCTGGA  
CTATGTCCGGGAACACAAAGACAATATTGGCTCCAGTACCTGCTCAACTGGTGTGTGCAGATCGCAAAG  
GGCATGAACTACTTGGAGGACCGTCGCTTGGTGCACCGCGACCTGGCAGCCAGGAACGTACTGGTGAAAA  
CACCGCAGCATGTCAAGATCACAGATTTTGGGCTGGCCAACTGCTGGGTGCGGAAGAGAAAGAATACCA  
TGCAGAAGGAGGCAAAGTGCCTATCAAGTGGATGGCATTGGAATCAATTTTACACAGAATCTATACCCAC

CAGAGTGATGTCTGGAGCTACGGGGTGA CTGTTGGGAGTTGATGACCTTTGGATCCAAGCCATATGACG  
GAATCCCTGCCAGCGAGATCTCCTCCATCCTGGAGAAAGGAGAACGCCTCCCTCAGCCACCCATATGTAC  
CATCGATGTCTACATGATCATGGTCAAGTGCTGGATGATAGACGCAGATAGTCGCCCAAAGTTCCGTGAG  
TTGATCATCGAATTCTCCAAAATGGCCCGAGACCCCCAGCGCTACCTTGTCATTAGGGGGATGAAAGAA  
TGCAATTTGCCAAGTCCTACAGACTCCAATTCTACCGTGCCCTGATGGATGAAGAAGACATGGACGACGT  
GGTGGATGCCGACGAGTACCTCATCCACAGCAGGGCTTCTTCAGCAGCCCCTCCACGTCACGGACTCCC  
CTCCTGAGCTCTCTGAGTGCAACCAGCAACAATTCCACCGTGGCTTGCAATTGATAGAAATGGGCTGCAAA  
GCTGTCCCATCAAGGAAGACAGCTTCTTGACGCGATACAGCTCAGACCCCACAGGCGCCTTGACTGAGGA  
CAGCATAGACGACACCTTCTCCAGTGCCTGAATACATAAACCAGTCCGTTCCCAAAAGGCCCGCTGGC  
TCTGTGCAGAATCCTGTCTATCACAATCAGCCTCTGAACCCCGCGCCAGCAGAGACCCACACTACCAGG  
ACCCCCACAGCACTGCAGTGGGCAACCCCGAGTATCTCAAACTGTCCAGCCCACCTGTGTCAACAGCAC  
ATTCGACAGCCCCTGCCCACTGGGCCAGAAAGGCAGCCACCAAATTAGCCTGGACAACCCTGACTACCAG  
CAGGACTTCTTTCCCAAGGAAGCCAAGCCAAATGGCATCTTTAAGGGCTCCACAGCTGAAAATGCAGAAT  
ACCTAAGGGTCGCGCCACAAAGCAGTGAATTTATTGGAGCATGACCACGGAGGATAGTATGAGCCCTAAA  
AATCCAGACTCTTTCGATACCCAGGACCAAGCCACAGCAGGTCTCCATCCCAACAGCCATGCCCCGATT  
AGCTCTTAGACCCACAGACTGGTTTTGCAACGTTTACACCGACTAGCCAGGAAGTACTTCCACCTCGGGC  
ACATTTTGGAAGTTGCATTCCTTTGTCTTCAAAGTGTGAAGCATTTACAGAAACGCATCCAGCAAGAAT  
ATTGTCCCTTTGAGCAGAAATTTATCTTTCAAAGAGGTATATTTGAAAAAAAAAAAAAGTATATGTGAGG  
ATTTTTATTGATTGGGGATCTTGGAGTTTTTCATTGTCGCTATTGATTTTTACTTCAATGGGCTCTTCCA  
ACAAGGAAGAAGCTTGCTGGTAGCACTTGCTACCCTGAGTTCATCCAGGCCCAACTGTGAGCAAGGAGCA  
CAAGCCACAAGTCTTCCAGAGGATGCTTGATTCCAGTGGTTCTGCTTCAAGGCTTCCACTGCAAAACACT  
AAAGATCCAAGAAGGCCTTCATGGCCCCAGCAGGCCGGATCGGTACTGTATCAAGTCATGGCAGGTACAG  
TAGGATAAGCCACTCTGTCCCTTCTGGGCAAAGAAGAAACGGAGGGGATGGAATTCTTCCTTAGACTTA  
CTTTTGTA AAAATGTCCCCACGGTACTTACTCCCACTGATGGACCAGTGGTTTCCAGTCATGAGCGTTA  
GACTGACTTGTGTCTTCCATTCCATTGTTTTGAACTCAGTATGCTGCCCTGTCTTGCTGTCATGAA

ATCAGCAAGAGAGGATGACACATCAAATAATAACTCGGATTCCAGCCCACATTGGATTTCATCAGCATTTG  
GACCAATAGCCACAGCTGAGAATGTGGAATACCTAAGGATAGCACCGCTTTTGTCTCGCAAAAACGTA  
TCTCCTAATTTGAGGCTCAGATGAAATGCATCAGGTCCTTTGGGGCATAGATCAGAAGACTACAAAAATG  
AAGCTGCTCTGAAATCTCCTTTAGCCATCACCCCAACCCCCAAAATTAGTTTGTGTTACTTATGGAAGA  
TAGTTTTCTCCTTTACTTCACTTCAAAGCTTTTTACTCAAAGAGTATATGTTCCCTCCAGGTCAGCTG  
CCCCCAAACCCCTCCTTACGCTTTGTCACACAAAAGTGTCTCTGCCTTGAGTCATCTATTCAAGCACT  
TACAGCTCTGGCCACAACAGGGCATTTTACAGGTGCGAATGACAGTAGCATTATGAGTAGTGTTGAATTC  
AGGTAGTAAATATGAACTAGGGTTTGAAATTGATAATGCTTTCACAACATTTGCAGATGTTTTAGAAGG  
AAAAAAGTTCCTCCTAAAATAATTTCTCTACAATTGGAAGATTGGAAGATTCAGCTAGTTAGGAGCCCA  
CCTTTTTCTAATCTGTGTGTGCCCTGTAACCTGACTGGTTAACAGCAGTCCTTTGTAAACAGTGTTTT  
AAACTCTCCTAGTCAATATCCACCCATCCAATTTATCAAGGAAGAAATGGTTCAGAAAATATTTTCAGC  
CTACAGTTATGTTTCAGTCACACACACATACAAAATGTTCTTTTGCTTTTAAAGTAATTTTTGACTCCCA  
GATCAGTCAGAGCCCCTACAGCATTGTTAAGAAAGTATTTGATTTTTGTCTCAATGAAAATAAACTATA  
TTCATTTCCACTCTATTATGCTCTCAAATACCCCTAAGCATCTATACTAGCCTGGTATGGGTATGAAAGA  
TACAAAGATAAATAAAACATAGTCCCTGATTCTAAGAAATTCACAATTTAGCAAAGGAAATGGACTCATA  
GATGCTAACCTTAAAACAACGTGACAAATGCCAGACAGGACCCATCAGCCAGGCACTGTGAGAGCACAGA  
GCAGGGAGGTTGGGTCCTGCCTGAGGAGACCTGGAAGGGAGGCCTCACAGGAGGATGACCAGGTCTCAGT  
CAGCGGGGAGGTGGAAAGTGCAGGTGCATCAGGGGCACCCTGACCGAGGAAACAGCTGCCAGAGGCCTCC  
ACTGCTAAAGTCCACATAAGGCTGAGGTGAGTCACCCTAAACAACCTGCTCCCTCTAAGCCAGGGGATGA  
GCTTGGAGCATCCCACAAGTTCCTAAAAGTTGCAGCCCCAGGGGGATTTTGAGCTATCATCTCTGCAC  
ATGCTTAGTGAGAAGACTACACAACATTTCTAAGAATCTGAGATTTTATATTGTCAGTTAACCCTTTCA  
TTATTCATTCACCTCAGGACATGCAGAAATATTTTCAGTCAGAACTGGGAAACAGAAGGACCTACATTCTG  
CTGTCACCTTATGTGTCAAGAAGCAGATGATCGATGAGGCAGGTGAGTTGTAAGTGAGTCACATTGTAGCA  
TTAAATTCTAGTATTTTTGTAGTTTGAAACAGTAACTTAATAAAAGAGCAAAAGCTATTCTAGCTTTCTT  
CTTCATATTTTAATTTCCACCATAAAGTTTAGTTGCTAAATTCTATTAATTTTAAGATTGTGCTTCCCA

AAATAGTTCTCACTTCATCTGTCCAGGGAGGCACAGTTCTGTCTGGTAGAAGCCGCAAAGCCCTTAGCCT  
CTTCACGGATCTGGCGACTGTGATGGGCAGGTCAGGAGAGGAGCTGCCCAAAGTCCCATGATTTTCACCT  
AACAGCCCTGATCAGTCAGTACTCAAAGCTTGGACTCCATCCCTGAAGGTCTTCCTGATTGATAGCCTGG  
CCTTAATACCCTACAGAAAGCCTGTCCATTGGCTGTTTCTTCCTCAGTCAGTTCCTGGAAGACCTTACCC  
CATGACCCCACTTCAGATGTGGTCTTTGGAAACAGAGGTGGAAGGAAAGTAAGGAGCTGAGAGCTCACA  
TTCATAGGTGCCGCCAGCCTTCGTGCATCTTCTTGATCATCTCTAAGGAGCTCCTCTAATTACACCATG  
CCCGTCACCCCATGAGGGATCAGAGAAGGGATGAGTCTTCTAACTCTATATTCGCTGTGAGTCCAGGT  
GTAAGGGGGAGCACTGTGGATGCATCCTATTGCACTCCAGCTGATGACACCAAAGCTTAGGTGTTTGCTG  
AAAGTTCTTGATGTTGTGACTTACCACCCCTGCCTCACAAGTGCAGACATAAGGGGACTATGGATTGCTT  
AGCAGGAAAGGCACTGGTTCTCAAGGGCGGCTGCCCTTGGGAATCTTCTGGTCCCAACCAGAAAGACTGT  
GGCTTGATTTTCTCAGGTGCAGCCAGCCGTAGGGCCTTTTCAGAGCACCCCTGGTTATTGCAACATTC  
ATCAAAGTTTCTAGAACCTCTGGCCTAAAGGAAGGGCCTGGTGGGATCTACTTGGCACTCGCTGGGGGGC  
CACCCCCAGTGCCACTCTCACTAGGCCTCTGATTGCACTTGTGTAGGATGAAGCTGGTGGGTGATGGGA  
ACTCAGCACCTCCCCTCAGGCAGAAAAGAATCATCTGTGGAGCTTCAAAGAAGGGGCCTGGAGTCTCTG  
CAGACCAATTCAACCCAAATCTCGGGGGCTCTTTCATGATTCTAATGGGCAACCAGGGTTGAAACCCTTA  
TTTCTAGGGTCTTCAGTTGTACAAGACTGTGGGTCTGTACCAGAGCCCCGTCAGAGTAGAATAAAAGGC  
TGGGTAGGGTAGAGATTCCCATGTGCAGTGGAGAGACAATCTGCAGTCACTGATAAGCCTGAGACTTGG  
CTCATTTCAAAGCGTTCAATTCATCTCACCAGCAGTTCAGCTGGAAAGGGGCAAATACCCCACTGA  
GCTTTGAAAACGCCCTGGGACCCTCTGCATTCTCTAAGTAAGTTATAGAAACCAGTCTCTTCCCTCCTT  
GTGAGTGAGCTGCTATTCCACGTAGGCAACACCTGTTGAAATTGCCCTCAATGTCTACTCTGCATTTCTT  
TCTTGATAAGCACACACTTTTATTGCAACATAATGATCTGCTCACATTCCTTGCTGGGGGCTGTAA  
AACCTTACAGAACAGAAATCCTTGCCTCTTTCACCAGCCACACCTGCCATACCAGGGGTACAGCTTTGTA  
CTATTGAAGACACAGACAGGATTTTTAAATGTAAATCTATTTTGTAACTTTGTTGCGGGATATAGTTCT  
CTTTATGTAGCACTGAACTTTGTACAATATATTTTGTAACTCATTTTCTACTAAAACAAACACAGTT  
TACTTTAGAGAGACTGCAATAGAATCAAATTTGAACTGAAATCTTTGTTTAAAAGGGTTAAGTTGAGG

CAAGAGGAAAGCCCTTTCTCTCTTATAAAAAAGGCACAACCTCATTGGGGAGCTAAGCTAGGTCATTGT  
CATGGTGAAGAAGAGAAGCATCGTTTTATATTTAGGAAATTTTAAAAGATGATGGAAAGCACATTTAGC  
TTGGTCTGAGGCAGGTTCTGTTGGGGCAGTGTTAATGGAAAGGGCTCACTGTTGTTACTACTAGAAAAAT  
CCAGTTGCATGCCATACTCTCATCATCTGCCAGTGTAACCCTGTACATGTAAGAAAAGCAATAACATAGC  
ACTTTGTTGGTTTATATATATAATGTGACTTCAATGCAAATTTTATTTTATATTTACAATTGATATGCA  
TTTACCAGTATAAACTAGACATGTCTGGAGAGCCTAATAATGTTTCAGCACACTTTGGTTAGTTCACCAAC  
AGTCTTACCAAGCCTGGGCCCAGCCACCCTAGAGAAGTTATTAGCCCTGGCTGCAGTGACATCACCTGA  
GGAGCTTTTAAAAGCTTGAAGCCCAGCTACACCTCAGACCGATTAAACGCAAATCTCTGGGGCTGAAACC  
CAAGCATTCTAGTTTTTAAAGCTCCTGAGGTCATTCCAATGTGCGGCCAAAGTTGAGAACTACTGGCCT  
AGGGATTAGCCACAAGGACATGGACTTGGAGGCAAATTCTGCAGGTGTATGTGATTCTCAGGCCTAGAGA  
GCTAAGACACAAAGACCTCCACATCTGTCGCTGAGAGTCAAGAACCTGAACAGAGTTTCCATGAAGGTTCT  
TCCAAGCACTAGAAGGGAGAGTGTCTAAACAATGGTTGAAAAGCAAAGGAAATATAAAACAGACACCTCT  
TTCCATTTCTAAGGTTTCTCTTTTATTAAGGGTGGACTAGTAATAAAATATAATATTCTTGCTGCTTA  
TGCAGCTGACATTGTTGCCCTCCCTAAAGCAACCAAGTAGCCTTTATTTCCACAGTGAAAGAAAACGCT  
GGCCTATCAGTTACATTACAAAAGGCAGATTTCAAGAGGATTGAGTAAGTAGTTGGATGGCTTTTCATAAA  
AACAAGAATTCAAGAAGAGGATTCATGCTTTAAGAAACATTTGTTATACATTCCTCACAAATTATACCTG  
GGATAAAACTATGTAGCAGGCAGTGTGTTTTCTTCCATGTCTCTCTGCACTACCTGCAGTGTGTCCTC  
TGAGGCTGCAAGTCTGTCCTATCTGAATCCCAGCAGAAGCACTAAGAAGCTCCACCCTATCACCTAGCA  
GATAAAACTATGGGGAAAACTTAAATCTGTGCATACATTTCTGGATGCATTTACTTATCTTTAAAAAAA  
AGGAATCCTATGACCTGATTTGGCCACAAAATAATCTTGCTGTACAATACAATCTCTTGGAATTAAGA  
GATCCTATGGATTTGATGACTGGTATTAGAGGTGACAATGTAACCGATTAACAACAGACAGCAATAACTT  
CGTTTTAGAAACATTCAAGCAATAGCTTTATAGCTTCAACATATGGTACGTTTTAACCTTGAAAGTTTTG  
CAATGATGAAAGCAGTATTTGTACAAATGAAAAGCAGAATTCTCTTTTATATGGTTTATACTGTTGATCA  
GAAATGTTGATTGTGCATTGAGTATTAATAAATTAGATGTATATTATTCATTGTTCTTTACTCCTGAGTA  
CCTTATAATAATAATAATGTATTCTTTGTTAACAA

>NM\_002759.4 Homo sapiens eukaryotic translation initiation factor 2 alpha kinase 2 (EIF2AK2), transcript variant 1, mRNA

GAAACTGAGAACCAGCTCTCCCGAAGCCGCGGGTCTCCGGCCGGCGGGCGGGCGGGCGGGCGGGCGGGCGGCG  
CAGTTTGCTCATACTTTGTGACTTGCGGTCACAGTGGCATTAGCTCCACACTTGGTAGAACCACAGGCA  
CGACAAGCATAGAAACATCCTAAACAATCTTCATCGAGGCATCGAGGTCCATCCAATAAAAATCAGGAG  
ACCCTGGCTATCATAGACCTTAGTCTTCGCTGGTATCACTCGTCTGTCTGAACCAGCGGTTGCATTTTTT  
TAAGCCTTCTTTTTTCTCTTTTACCAGTTTCTGGAGCAAATTCAGTTTGCCTTCCTGGATTTGTAAATTG  
TAATGACCTCAAACTTTAGCAGTTCTTCATCTGACTCAGGTTTGCTTCTCTGGCGGTCTTCAGAATCA  
ACATCCACACTTCCGTGATTATCTGCGTGCATTTTGGACAAAGCTTCCAACCAGGATACGGGAAGAAGAA  
ATGGCTGGTGATCTTTCAGCAGGTTTCTTCATGGAGGAACTTAATACATACCGTCAGAAGCAGGGAGTAG  
TACTTAAATATCAAGAACTGCCTAATTCAGGACCTCCACATGATAGGAGGTTTACATTTCAAGTTATAAT  
AGATGGAAGAGAATTTCCAGAAGGTGAAGGTAGATCAAGAAGGAAGCAAAAAATGCCGCAGCCAAATTA  
GCTGTTGAGATACTTAATAAGGAAAAGAAGGCAGTTAGTCCTTTATTATTGACAACAACGAATTCTTCAG  
AAGGATTATCCATGGGGAATTACATAGGCCTTATCAATAGAATTGCCAGAAGAAAAGACTAACTGTAAA  
TTATGAACAGTGTGCATCGGGGGTGCATGGGCCAGAAGGATTTTATTATAAATGCAAAATGGGACAGAAA  
GAATATAGTATTGGTACAGGTTCTACTAAACAGGAAGCAAAACAATTGGCCGCTAAACTTGCATATCTTC  
AGATATTATCAGAAGAAACCTCAGTGAAATCTGACTACCTGTCCTCTGGTTCTTTTGCTACTACGTGTGA  
GTCCCAAAGCAACTCTTAGTGACCAGCACACTCGCTTCTGAATCATCATCTGAAGGTGACTTCTCAGCA  
GATACATCAGAGATAAATTCTAACAGTGACAGTTTAAACAGTTCTTCGTTGCTTATGAATGGTCTCAGAA  
ATAATCAAAGGAAGGCAAAAAGATCTTTGGCACCCAGATTTGACCTTCCTGACATGAAAGAAACAAAGTA  
TACTGTGGACAAGAGGTTTGGCATGGATTTTAAAGAAATAGAATTAATTGGCTCAGGTGGATTTGGCCAA  
GTTTTCAAAGCAAAACACAGAATTGACGGAAAGACTTACGTTATTAACGTGTTAAATATAATAACGAGA  
AGGCGGAGCGTGAAGTAAAAGCATTGGCAAACTTGATCATGTAAATATTGTTCACTACAATGGCTGTTG

GGATGGATTTGATTATGATCCTGAGACCAGTGATGATTCTCTTGAGAGCAGTGATTATGATCCTGAGAAC  
AGCAAAAATAGTTCAAGGTCAAAGACTAAGTGCCTTTTCATCCAAATGGAATTCTGTGATAAAGGGACCT  
TGGAACAATGGATTGAAAAAAGAAGAGGCGAGAACTAGACAAAGTTTTGGCTTTGGAACCTTTGAACA  
AATAACAAAAGGGGTGGATTATATACATTCAAAAAATTAATTCATAGAGATCTTAAGCCAAGTAATATA  
TTCTTAGTAGATACAAAACAAGTAAAGATTGGAGACTTTGGACTTGTAACATCTCTGAAAAATGATGGAA  
AGCGAACAAGGAGTAAGGGAACCTTGCGATACATGAGCCCAGAACAGATTTCTTCGCAAGACTATGGAAA  
GGAAGTGGACCTCTACGCTTTGGGGCTAATTCTTGCTGAACTTCTTCATGTATGTGACACTGCTTTTGAA  
ACATCAAAGTTTTTCACAGACCTACGGGATGGCATCATCTCAGATATATTTGATAAAAAAGAAAAAACTC  
TTCTACAGAAATTACTCTCAAAGAAACCTGAGGATCGACCTAACACATCTGAAATACTAAGGACCTTGAC  
TGTGTGGAAGAAAAGCCCAGAGAAAAATGAACGACACACATGTTAGAGCCCTTCTGAAAAAGTATCCTGC  
TTCTGATATGCAGTTTTCTTAAATTATCTAAAATCTGCTAGGGAATATCAATAGATATTTACCTTTTAT  
TTAATGTTTCCTTTAATTTTTTACTATTTTTACTAATCTTCTGCAGAAACAGAAAGGTTTTCTTCTTT  
TTGCTTCAAAAACATTCTTACATTTTACTTTTTCTGGCTCATCTCTTATTCTTTTTTTTTTTTTAAAG  
ACAGAGTCTCGCTCTGTTGCCAGGCTGGAGTGCAATGACACAGTCTTGGCTCACTGCAACTTCTGCCTC  
TTGGGTTCAAGTGATTCTCCTGCCTCAGCCTCCTGAGTAGCTGGATTACAGGCATGTGCCACCCACCCAA  
CTAATTTTTGTGTTTTTAATAAAGACAGGGTTTCACCATGTTGGCCAGGCTGGTCTCAAACCTCCTGACCT  
CAAGTAATCCACCTGCCTCGGCCTCCCAAAGTGCTGGGATTACAGGGATGAGCCACCGCGCCCAGCCTCA  
TCTCTTTGTTCTAAAGATGGAAAAACCAACCCCAAATTTCTTTTTATACTATTAATGAATCAATCAATT  
CATATCTATTTATTAATTTCTACCGCTTTTAGGCCAAAAAAATGTAAGATCGTTCTCTGCCTCACATAG  
CTTACAAGCCAGCTGGAGAAATATGGTACTCATTAATAAAAAAAAAAAAAAAAAAGTGATGTACAACCACTTCGG  
AAAACAATTTGGCATTATCTAGTAAAGTTGAATCCATGTATACCCACATAGCTATCAATTCTATTCCTAC  
ATACGTGCTTACAAGAATGTCCATAAAACCCTGTTTATAATAGCCAAAAGAACAGGGAACAACCATAATG  
CACATCAAAAGAAGAATGGATTAATAAATTATATTCACACACAGGAGTACTATATAGTATTGAAAACAA  
TTGAAGTACAGCTAAATGTAATAACGTAACACAATACTCTCAGAAACATAATGTTAAGCGAACAAG  
CAGGTTTTTCAGAAAATATATGCAGAATAATTCCATTTATATAAAGTTCCAGAGCATGCAAACTAAATCA

TTTTGTATAAAAAACCCAACAAATGTGATGAGACAATAATGGGAAGGAAGGGAATGAGAAATATTAAATT  
CTGGATGGTGGTTATCTTTGAGGGAGGGGAATGATGTGATTGGGGAAATGGACTTTCAAAGGTAATGGTA  
ACTTCCTTAAGCTGGATGGTAGGTCCACTAGTGTTGCTGCATAGTTATACCTTTTATCTTAAATACATT  
TTGTATCTATTGTAACAACCACTTTAAAGACAACCGTGCTGTAAGGCAGTAGCTAAAAACAGAAAATAGT  
CCATCGGGAAGGGTAAGATGGCTTTCTGCTGAGCACAGGGCTAGAAGTGACAGCCCAGTGGGCCTTCCAA  
CTATATGCCAGGGTGTTAGATGAGTAGAGAGGAGACCACCCAGGAAGTCTGGACAAGGGGTCTGGCATGA  
GCTCTGGAGAAGATATATTTGAGGAACATGGGGTATGCTAGTTTGTTGTCCTGAATTGCTGTAGAGAAGA  
TAATTTAAATTGCATCTTAGAAGACGACCCTGAGGGTGAATTTCAACTTAGGGCAATTGTTTTAGTTTGT  
TTCTTATTGGTTTAAATGGATACTTGAAGCTGGATAATTTATAAGGAAAAGAGATTTATATGACTTACAG  
TTCTGCAGGCTGTACAAGAAACATGGCACCAGCATCTGCTTCTCCCCGGCTGCTTCCACTCATGGTGGA  
AGGTGAAGGGGAGCCGGATGTGCAGAGATCATATGGCAAGAGAGGAAGCAAGAGAGCGAGGGAGAAGGTG  
CCAGGCTCTTTTTAAATAACCGGCTCTTGAGGGAACTAATAGATTGAGAACTCCTTGCTTCTCCTCCCCA  
GCACACCCACCCCCAGGGACGGCATTAAATGTATTCATGAGGGGTCTTCCCCATGACCCAAACACCTCC  
CATCAGGCCCCACCTCCAACACTGGGATCAAATTTCAACATGAGATTTTGGGGGACAAACATGCAAACTA  
TAGCAGCAACCAGCTACCATTCTAAAAGTCCCATATGATTTTAGGATTTTAAAAAGGGCCAAATTTAGG  
TTAAGCAAAAAGTGAAAATACAGTAAGAGAAAATAGTTTTATAAAGGCTTTAAAAAGTGTTTCATAAAGAG  
CAGTTCATAGATTTTTCACGTAACGTTTCATCAATAGATGCTAAACTATTGGATGAAAAGCTATTGTGGA  
ATAGGATCTTCTACAAGGATTTAAATATAATCCTACAGAAGAGGTATCAATTATACAGGGGAAAATGTAC  
CTTTACAATGGTCACCACAATAACCAAGTGATTCAATTTAGCATCACCCAAGGTGGAACACCCTAACATT  
ATGCCCTCCTGATGTGACTTAAGAATTTTACCTATTTAGTTTTCTTGACAAAGTGTTAAACTGGAATT  
TAATCATGAGGAAATTATTAGACAAATCCTGAATGTAGTCATTCTATAAGATGATTGACTTGGGCTTCTC  
AAAAAGTCAGTGTGATGAAAAAAAAAAAAAGGGGAGAGACTTGTAAGATACAATGACCAAATGCAATGTT  
TGAATCTTTATTGTATTCTGGATATTTAAAAAGACAAAAGCTGGACGCAGTAGCTAATGCCTGTTATCCC  
AGCATTTTTGGGAGGTCAAAGGGGAGGATGGCTTGAGCATAGGATTTTGAGACTAGCCTGGGCAACACA  
GTGAGTTCTCATCTCTACAAAAAATCAGAAAATTAGCTGGGCATGGTAGTGTGCATCTGTGGTCCCAGCT

ACTTGGGGGGGTGAGGTGGGAGGATCACTTGAGCCTAGGAGGTCAAGGCCGCAGTGAGCCATGATCATGT  
TACTGCATTCCAGCCTGGGTGACAGAGTGAGATCATATCTAAATAATAATAATAATAAAAGAAAGCAACA  
ACCCAGCAAACAGCTATAAAGATATCTTCGGGACAATTGAGAACATTTGAATATAGACTGCATATTAGAT  
AACAATGCCAAATAACTGTTTTCTCAGGTGTGATAATAGTATATGTAGAAAATGTCTTTTTGTTTTGTTT  
TATTTTGTGTTTTGTTGTTTGTGTTTTGAGACAGAGTCTCACTGTGTCGCCAGGCTGGAGTGCACTG  
GCACGATCTCGGCTCACTGCAACCTCTGCCTCCCAGGTTCAAGTGATTCTCCTGCCTCTGCTTCCTGAGT  
AGCTGGGATTACAGGTATCTGCCACCACTCCAGGTAAATTTTTCTATTTTAGTAGAGACGGAATTTCA  
CCATGTTGACCCAGCTGGTTTTGAACTCCTGACCTCAGGTGATTCACTTGCCTTGGCCTCCCAAAGTGTT  
GAGATTACAGGCATGAGTCACTGCACCCAGCCAAAAATGTTTTTTAGGCAATGCATGCACAAACATTTA  
GAGGCCAAGTGTGTCATGATGTCTGCAACTTTCAATGTTTCAGCAAAAATCAACATGGAGAGAGAAAAGAGG  
GCACACATGTGGCAAAATATTAGCCATTGTACAATTGGTAAATCTAGATGACAGTACACAGGTGTTTGTT  
GTATTATTCTTTGAACTTTTCTGTAGATTGGAAATGTTCTGCGTAGAGAGAAATCTTTTTTAAAAAAA  
CAATATCTGGTTTTGATTAATGAGGCTATATTCAAAGAAACACTAAATGATGTGGCCAGTTAGTGAGAA  
TGTAGCCTTATCTTTACTGACCTCATTTAATATTCTACTCTGGCTGGGCATGGTGGCTCACGCCTATA  
ATCCCAGCACTCTGGGAGGCCGAGACGGGTGGATCACCTGAGGTCAGGGGTTTCGAGACCAGCCTGGCCAA  
CATGGTGAAACCCCATCTCTACTAAAAATACAAAAATTAGCTGGGTGTGGTGGTAGGCGCCTGTAATCCC  
AGCTACTCGGGAGTCCGTGGCAGGAGAATCGCTTGAACCCAGGAGGTGGAGGTTGCAGTGAGCTGAGATC  
ACGCCATTGCACTCCAGCCTGGGTGACAAGAGCAAACTCAGTCTCAAAAAAAAAAAGAAAAAAAAAGA  
TATATATATTCTACTCTTATTAATGAATATAGCATTTCTTAGCAACTTCTTTGATTTGTGAGTATAT  
ATTTTCTTGGCCTCAAAATTAAGTAAAAAGTATCCTCTTACTCAGAGGAGGACAGGGGCAAGAGCCTGG  
GACCTTATTGCTAATTAATTAATGCACACACACACACACACACAGAAATTTGAGAGCCATTTTAATAT  
AATTGCCTCCCTAGAAACATACCTTTTAGGGAATTTTATCACTAAACCACATGTTATTTAATACGTAC  
ATGTTTAACATAAATACATACATAAAATTCACATGCATACTTAACACTTATGTTAAATATATTCAATGTA  
TATACATATGTACACAATATATGCATATATACATGTGGGTATGTGGTATGTGTGCATGTGTGTGTATGGC  
CAGCTACATAATTTGTGGGACTAAGGGCAAAATGAACTGTACGGCCCTCGTTCAAAATTAGGTGTGGG

GTGCTTCTAAGCACAGTCTTGTGCAACTGCACAGGTTGCATGTCCATGAAGCCATCCTGTGTGTGTGCAC  
ATATGTGTATGAATATGTATTTTATATAATACATATATATGCATGTATGTATCTGAGAAGAAATGTTTAA  
AAGGCTACATACAAGCTTTTCCAGGTCTCTACTATCTGTAACTAACTAGAGACATAACTCACAATATGC  
AGTCCCCACTGAGTGTTACCATAATTTGAGATTCTTGGCATGTAACTTTTCATTATGGAATATTGAAT  
AATTTCAATATTATTCATACATTTCTTTATGTTCAAACATACACAAAAATAGAATAATGAACTCTACCC  
ATCACCCAGCTGCAACAAATATCAATACTTTACCGTTCTTAATACATCTAACCCCTTACTTTTTGTTTGT  
TTCTTTTGGTGAAGTATTTAATTGTAATTTTTTTTTTAAGAGACAGGATCTCACTCTGTCACCCAGGCCA  
GAGTACAGTGGTACGATCACAGCTCCTTGTAACCTCGAACTCCTAGGCTCAAGTGATCCTCCTGCCTCAG  
CCGCTTGAATAGCTGGGACTACATGCATACACCAACACACCCAATAATTTTTAAATTTTTGTAGAAAT  
ATGGTCTTGCTGTGTTTCCAGGCTGGTCTCAAACCTCTGGCCTTGAGAGATTCTCCTGCCTGGTCTTC  
CAAACCTGCTGGGATTACAATATCCGGCCCTACTGGAATATTTTAAAGTAAATCTCAGGTGTTACATCATT  
GCACTTGTAAGTACTTTAAATGTATCTCTAGCAGATAAATCTTTTAAACAAAACCACAGCATCATTGTC  
ACACTCAAAAAATTGACAAGATTTCTTAATTATCATATAATAGTCTGTATTGTTTCTATCTCAAAAATA  
CAGTTTTCTTGGTTGTTGAAATCTAGATCCAACATTGCATTTGGTTGATGTGTCTCCTTTACTCTGTAAA  
ATTTACCCCTGCGTTTTAGTTCCTTTTCGGCTTTTATTTGTCCTGTGGAATTCCTCCACTCAGGATTTGA  
CTGAGAGTATCCCCAGAGTGTCAGTTAGACCTAGAAGCTGGATTTGATCCTGGTTCATTTATTTTCCCC  
CAAGAATACTCCATAGGTGATGCTATACACTTTCTCTTACATCATTTTCAGGAGGAACATGATGTCTGATT  
GTTCCACTTTCAGTGATTTTAATATTGATCAATGAGTTCTGGTGGTACCAACTACTACAAAGTTTCTCAT  
CAATCTTTCACCTGATGGTTTTAGCAGCTATTGATAATTGTTGCCTGGATCCATTATTTTCATTTCAGGGG  
TTGTAAAATAGTGATTTTCTGGTTCTATCAAACCTCTTGCAATTTATCATCTATGATTCTTCTTTAAGGAA  
CTTCTCTAAATCTGAATGGGAAAGATGCGATAAATATTTATCAAATTTTAGAGTGAGTTAGTGCCTAG  
CAACCTCCACAGTTGACAAATGAGTATTTCTTTAAAGCAAGGTATGGCCCAACCAATACTTTGAACTAG  
CATGTTTAGAATAGAGCAGGAGGAACTATATTTGAAAGGTCAGAAGTGGAAGACTAAGAGGGCCTGAA  
CAATAAGAGGACAGAACCAAGAGGAGTTGGCAACTAATTGGATGTGGGGATTAAGGAAAGGTAAGCATCA  
AAGATTACCTCCAAGTTTGTTAGAAAGGTTAGTAGCAGGATTCTGATGCCATTCAAGTAAATACAAGTCTC

AGTCAGATGAACCCCAAGAGCCACATGTATTTGAGGGGTACTTTGTCTCACACTTTTACCTGTTACATGG  
TTTTCAGTAATTTAGAATTTAAGCCAGTAGTGGGGCGACTGTACATCTATCGACATGGTGAGGTAGAGCA  
TGTTTGGGAGGAAAGACGTTGAATCCCATTTGGTGACAGTGAGCTTGAGGTGCTGCCAGAACACTGCACT  
GAAGATAGGAGGAGACTGTAGGAAATACAAGATAGGAAAGGTCTCCACTGAAATGTAACTCTTTCTCTC  
TAAACGGCCATCCAGGCCTCAATGTCTGCAGTTTCTGATCTGTGATTATGACTTATCCAAATCTTACATT  
TCTTAAAAATAGTCATAGATGAAGGGAATCACAGTTGATAGTTATATGGTGACATTATTGGCTTAAATTC  
TAAATAACTAGAACTGTATAATAGGCAAACTGTGAGGCAAATAAAATGCTTCTCAAATCTGTGTGGCT  
CTTATGGGGTTAATTTGATTTGGACCTGTATTAATTTCTTATGGCTGCTATAACTAACAAATTACCACAA  
ACTTGGTGGTTTAAAACAACACACATTTATTCTCTTTCTGTTCTGGAGGCCAGAAGTCTAAAATGAGATT  
CACTGGGCTGCAGTTCACTGGGCAAGGCCATGCTCCTCTGGAGGCTTCATGATGCATCCCATATTCAGT  
GTTTCCCGAGTAAGCCCCACCCATGCAGGTCTGCAGTTTACCTCAACAGGCTTTTGCACTCAGTGGCTC  
TCTCCTGTGGTTTCTATCTGAAATTCTCTTCATTTTTTTTTTAATAACTGCTTTATTGAGATATAATTCA  
CATGCCATACAATTCACCTATACAGTATACAATTCAGTAGTGTTTACTATATTCAGAGTTGTGCAACTAT  
CATTTTTCTCACCCCCAAAAGAAACCTATGCCCGTTAGTATTCAGTCTGTTTTCTCACAACCTCTAGGTA  
ACCACTAATCTACTCTCCATCTCTATAGATTTGCCCATGCTAGACATTTATATAAATGGAATCATACAT  
GTGGTCTTTTTCACTGAGTATATTTCAAGGTGCATCCCAGCTGTGGCATGAATCAGCATCTCATTCTT  
TTTATTGCCAAATAATATTCTATCATATGGATATGTCGCATTTTATGTATCCATTCATCAGCTGATGGAC  
ATTTGGGTTGTTTGTACTTTTTGGCTACCATGAATAATGCTACTATGAACTTTTGTGTACAAATCTTATG  
TGGACTTGTTTTCATTTCTCTTGATGTATATTCCTAGGAGAATGGCTGGATTATACAGTAACTCTTCC  
TCATAACTTTGCATATCAAAATTATATCCATCTTTCAGAACCCAAATTCAGTGTTATTTCCAAAGTGTT  
CAACATCTCCCACTCAAAATGAATCTTCTCCCTAGTACTCCCATGTTTAGTACCTAATTGTTCTTACCA  
GTTTGTCTTAGAGCTCAGTCATTCTACACAGCACTTTTCTTATTATACTGCTAATTTTATTACACTGT  
AAGAGTGGGGACAAGCTGTTCTTCTGTATACCAGAAAGTAGTGAGTGCACTGCTGTGAAGAAAGCAGGA  
ACTCAAAAGTTAAGAATTTTGAATGAGCCTATAAAATGTGTCTAATAAATAATAATGTTTCAATTTCAAAT  
CTCAACAATTAATGTTTAACAAATAACACTTGAAATAAATGTTTATTAGAAAAACCA

>NM\_004836.7 Homo sapiens eukaryotic translation initiation factor 2 alpha kinase 3 (EIF2AK3), transcript variant 1, mRNA

AGGCTGTCACTCAGGTGGCAGCGGCAGAGGCCGGGCTGAGACGTGGCCAGGGGAACACGGCTGGCTGTCC  
AGGCCGTGCGGGCGGCAGTAGGGTCCCTAGCACGTCCTTGCCTTCTTGGGAGCTCCAAGCGGCGGGAGAG  
GCAGGCGTCAGTGGCTGCGCCTCCATGCCTGCGCGCGGGGCGGGACGCTGATGGAGCGCGCCATCAGCCC  
GGGGCTGCTGGTACGGGCGCTGCTGCTGCTGCTGCTGCTGCTGGGGCTCGCGGCAAGGACGGTGGCCGCG  
GGGCGCGCCCGTGGCCTCCCAGCGCCGACGGCGGAGGCGGCGTTCGGCCTCGGGGCGGCCGCTGCTCCCA  
CCTCAGCGACGCGAGTACCGGCGGCGGGCGCCGTGGCTGCGGCCGAGGTGACTGTGGAGGACGCTGAGGC  
GCTGCCGGCAGCCGCGGGAGAGCAGGAGCCTCGGGGTCCGGAACCAGACGATGAGACAGAGTTGCGACCG  
CGCGGCAGGTCATTAGTAATTATCAGCACTTTAGATGGGAGAATTGCTGCCTTGGATCCTGAAAATCATG  
GTAAAAAGCAGTGGGATTTGGATGTGGGATCCGGTTCCTTGGTGTATCCAGCCTTAGCAAACCAGAGGT  
ATTTGGGAATAAGATGATCATTCTCCCTGGATGGAGCCCTCTTCCAGTGGGACCAAGACCGTGAAAGC  
ATGGAAACAGTTCCTTTCACAGTTGAATCACTTCTTGAATCTTCTATAAATTTGGAGATGATGTTGTTT  
TGGTTGGAGGAAAATCTCTGACTACATATGGACTCAGTGCATATAGTGGAAGGTGAGGTATATCTGTTC  
AGCTCTGGGTTGTCGCAATGGGATAGTGACGAAATGGAACAAGAGGAAGACATCCTGCTTCTACAGCGT  
ACCCAAAAAAGTGTAGAGCTGTCGGACCTCGCAGTGGCAATGAGAAGTGGAATTTAGTGTGGCCACT  
TTGAACTTCGGTATATTCCAGACATGGAAACGAGAGCCGATTTATTGAAAGCACCTTTAAGCCCAATGA  
GAACACAGAAGAGTCTAAAATTATTTAGATGTGGAAGAACAGGAAGCTGCCATAATGGACATAGTGATA  
AAGGTTTCGGTTGCTGACTGGAAAGTTATGGCATTAGTAAGAAGGGAGGACATCTGGAATGGGAGTACC  
AGTTTTGTACTCCAATTGCATCTGCCTGGTTACTTAAGGATGGGAAAGTCATTCCCATCAGTCTTTTTGA  
TGATACAAGTTATACATCTAATGATGATGTTTTAGAAGATGAAGAAGACATTGTAGAAGCTGCCAGAGGA  
GCCACAGAAAACAGTGTTTACTTGGGAATGTATAGAGGCCAGCTGTATCTGCAGTCATCAGTCAGAATTT

CAGAAAAGTTTCCTTCAAGTCCCAAGGCTTTGGAATCTGTCACTAATGAAAACGCAATTATTCCTTTACC  
AACAATCAAATGGAAACCCCTTAATTCATTCTCCTTCCAGAACTCCTGTCTTGGTAGGATCTGATGAATTT  
GACAAATGTCTCAGTAATGATAAGTTTTCTCATGAAGAATATAGTAATGGTGCACTTTCAATCTTGCACT  
ATCCATATGATAATGGTTATTATCTACCATACTACAAGAGGGAGAGGAACAAACGAAGCACACAGATTAC  
AGTCAGATTCTCGACAACCCACATTACAACAAGAATATCCGCAAAAAGGATCCTGTTCTTCTTTTACAC  
TGGTGGAAAGAAATAGTTGCAACGATTTTGTGTTGTATCATAGCAACAACGTTTATTGTGCGCAGGCTTT  
TCCATCCTCATCCTCACAGGCAAAGGAAGGAGTCTGAAACTCAGTGTCAAACGAAAATAAATATGATTCT  
TGTAAGTGGTGAAGCCAATGACAGTAGCTGGAATGACATAAAAAACTCTGGATATATATCACGATATCTA  
ACTGATTTTGAGCCAATTCAATGCCTGGGACGTGGTGGCTTTGGAGTTGTTTTGAAGCTAAAAACAAAG  
TAGATGACTGCAATTATGCTATCAAGAGGATCCGTCTCCCAATAGGGAATTGGCTCGGGAAAAGGTAAT  
GCGAGAAGTTAAAGCCTTAGCCAAGCTTGAACACCCGGGCATTGTTAGATATTTCAATGCCTGGCTCGAA  
GCACCACCAGAGAAGTGGCAAGAAAAGATGGATGAAATTTGGCTGAAAGATGAAAGCACAGACTGGCCAC  
TCAGCTCTCCTAGCCCAATGGATGCACCATCAGTTAAAATACGCAGAATGGATCCTTTGCTACAAAAGA  
ACATATTGAAATCATAGCTCCTTCACCACAAAGAAGCAGGTCTTTTTCAGTAGGGATTTCTGTGACCAG  
ACAAGTTCATCTGAGAGCCAGTTCTCACCCTGGAATTCTCAGGAATGGACCATGAGGACATCAGTGAGT  
CAGTGGATGCAGCATAACAACCTCCAGGACAGTTGCCTTACAGACTGTGATGTGGAAGATGGGACTATGGA  
TGGCAATGATGAGGGGCACTCCTTTGAACTTTGTCTTCTGAAGCTTCTCCTTATGTAAGGTCAAGGGAG  
AGAACCTCCTCTTCAATAGTATTTGAAGATTCTGGCTGTGATAATGCTTCCAGTAAAGAAGAGCCGAAAA  
CTAATCGATTGCATATTGGCAACCATTGTGCTAATAAACTAACTGCTTTCAAGCCCACAGTAGCAAATC  
TTCTTCTGAAGCTACATTGTCTATTTCTCCTCCAAGACCAACCACTTTAAGTTTAGATCTCACTAAAAAC  
ACCACAGAAAAACTCCAGCCAGTTCACCAAAGGTGTATCTTTACATTCAAATGCAGCTGTGCAGAAAAAG  
AAAACCTCAAAGACTGGATGAATGGACGATGTACCATAGAGGAGAGAGAGAGGAGCGTGTGTCTGCACAT  
CTTCCTGCAGATCGCAGAGGCAGTGGAGTTTCTTCACAGTAAAGGACTGATGCACAGGGACCTCAAGCCA  
TCCAACATATTCTTTACAATGGATGATGTGGTCAAGGTTGGAGACTTTGGGTTAGTGACTGCAATGGACC  
AGGATGAGGAAGAGCAGACGGTTCTGACCCCAATGCCAGCTTATGCCAGACACACAGGACAAGTAGGGAC

CAAACGTATATGAGCCCAGAGCAGATTCATGGAAACAGCTATTCTCATAAAGTGGACATCTTTTCTTTA  
GGCCTGATTCTATTTGAATTGCTGTATCCATTCAGCACTCAGATGGAGAGAGTCAGGACCTTAAGTGATG  
TAAGAAATCTCAAATTTCCACCATTATTTACTCAGAAATATCCTTGTGAGTACGTGATGGTTCAAGACAT  
GCTCTCTCCATCCCCATGGAACGACCTGAAGCTATAAACATCATTGAAAATGCTGTATTTGAGGACTTG  
GACTTTCCAGGAAAAACAGTGCTCAGACAGAGGTCTCGCTCCTTGAGTTCATCGGGAACAAAACATTCAA  
GACAGTCCAACAACCTCCCATAGCCCTTGCCAAGCAATTAGCCTTAAGTTGTGCTAGCAACCCTAATAGG  
TGATGCAGATAATAGCCTACTTCTTAGAATATGCCTGTCCAAAATTGCAGACTTGAAAAGTTTGTTCTTC  
GCTCAATTTTTTTGTGGACTACTTTTTTATATCAAATTTAAGCTGGATTTGGGGGCATAACCTAATTTG  
AGCCAACCTCTGAGTTTTGCTATACTTAAGGAAAGGGCTATCTTTGTTCTTTGTTAGTCTCTTGAAACTG  
GCTGCTGGCCAAGCTTTATAGCCCTCACCATTTGCCTAAGGAGGTAGCAGCAATCCCTAATATATATATA  
TAGTGAGAACTAAAATGGATATATTTTTATAATGCAGAAGAAGGAAAGTCCCCCTGTGTGGTAACTGTAT  
TGTTCTAGAAATATGCTTTCTAGAGATATGATGATTTTGAAACTGATTTCTAGAAAAAGCTGACTCCATT  
TTTGTCCCTGGCGGGTAAATTAGGAATCTGCACTATTTTGGAGGACAAGTAGCACAACTGTATAACGGT  
TTATGTCCGTAGTTTTATAGTCCTATTTGTAGCATTCAATAGCTTTATTCCTTAGATGGTTCTAGGGTGG  
GTTTACAGCTTTTTGTACTTTTACCTCCAATAAAGGGAAAATGAAGCTTTTTATGTAAATTGGTTGAAAG  
GTCTAGTTTTGGGAGGAAAAAAGCCGTAGTAAGAAATGGATCATATATATTACAACCTAAGTCTTCAACT  
ATGGACTTTTTAAGCCTAATGAAATCTTAAGTGTCTTATATGTAATCCTGTAGGTTGGTACTTCCCCAA  
ACTGATTATAGGTAACAGTTTAATCATCTCACTTGCTAACATGTTTTTATTTTCACTGTAAATATGTTT  
ATGTTTTATTTATAAAAATTCTGAAATCAATCCATTTGGGTTGGTGGTGTACAGAACACACTTAAGTGTG  
TTAACTTGTGACTTCTTTCAAGTCTAAATGATTTAATAAACTTTTTTTAAATTAA

>NM\_004094.5 Homo sapiens eukaryotic translation initiation factor 2 subunit alpha (EIF2S1), mRNA

ATGCGCGGTGGAGTGAGCGAAGCGCACGCTGAGGAGGATCGGCGGCCGGTGAGGGGGAAGCAAGTCTGGT  
CTCTGTGATTGAAGAAGTCGGCTCTGGGCTCCAGTGCGGGAATCACACACATACCTCAGAATGCCGGGTC  
TAAGTTGTAGATTTTATCAACACAAATTTCTGAGGTGGAAGATGTAGTGATGGTGAATGTCAGATCCAT  
TGCTGAAATGGGGGCTTATGTCAGCTTGCTGGAATACAACAACATTGAAGGCATGATTCTTCTTAGTGAA  
TTATCCAGAAGGCGTATCCGTTCTATCAACAAACTCATCCGAATTGGCAGGAATGAGTGTGTGGTTGTCA  
TTAGGGTGGACAAAGAAAAAGGATATATTGATTTGTCAAAAAGAAGAGTTTCTCCAGAGGAAGCAATCAA  
ATGTGAAGACAAATTCACAAAATCCAAAAGTGTATAGCATTCTTCGTCATGTTGCTGAGGTGTTAGAA  
TACACCAAGGATGAGCAGCTGGAAAGCCTATTCCAGAGGACTGCCTGGGTCTTTGATGACAAGTACAAGA  
GACCTGGATATGGTGCCTATGATGCATTTAAGCATGCAGTCTCAGACCCATCTATTTTGGATAGTTTAGA  
TTTGAATGAAGATGAACGGGAAGTACTCATTAAATAATATTAATAGGCGCTTGACCCACAGGCTGTCAAA  
ATTCGAGCAGATATTGAAGTGGCTTGTTATGGTTATGAAGGCATTGATGCTGTAAAAGAAGCCCTAAGAG  
CAGGTTTGAATTGTTCTACAGAAAACATGCCCATTAAGATTAATCTAATAGCTCCTCCTCGGTATGTAAT  
GACTACGACAACCCTGGAGAGAACAGAAGGCCTTTCTGTCCTCAGTCAAGCTATGGCTGTTATCAAAGAG  
AAGATTGAGGAAAAGAGGGGTGTGTTCAATGTTCAAATGGAGCCCAAAGTGGTCACAGATACAGATGAGA  
CTGAACTTGCGAGGCAGATGGAGAGGCTTGAAAGAGAAAATGCCGAAGTGGATGGAGATGATGATGCAGA  
AGAAATGGAAGCCAAAGCTGAAGATTAACCTTTGTGGGAAACAGAGTCCAATTTAAGGAACACAGAGCAGC  
GCTTCCTGGCTGTAAATCCTAGACTTGAAAGTTTTCCAGTATTGAAAACCTCAAAGCTGAATATTTTTTA  
TTTCTAAGTATTTAAATGTTCTAACAGATCAGAACATGAAATGCCCTCCTAAATGTCAGCTGTTGTCACA  
CAGTAGCTCCAACACTTTGAGCATTTTTAAGGGAGTGGCCTCATTTCACTAGAGACAAATCTTTAAGAAT  
AGTTCTAAAATTGGGCTTGTTGATTTCCATTTCTGATGTCTCCAGATTGGCACCCCTTCTAGTTCAATGC  
CTCACGAGATTTGCCAGGGGCATCCAAGGCAAACAATCCCAATCTTTCTATATAAAATGTATTCAAGCAA  
ACATCAAATAAATTTCTGGGATATTTAACTATAGGCTTCTTCCTTCTTGTCACCAAGTTAAAAGCATTTTA  
ATACTAAGACCCTAATTCTTTTATCTTTATTTTAGTCTTGATGTGGAACTGTAGGAGCAGGTGAATAAAG  
GATCTCTATAACAGATCCTTTCAAAGAAGAGTTTTAGAGAAAATAAATTTAACTTTAACCACAGTGAAA  
GTTGACCCTTAGCGGGACAAAGCCTTAAATGCATTGAAAGAATTAGATCGGTTCTGTGCCTTTTATCTA

TTTGAGATTGATGACAACCTGTGTGAGAGAATTTATCACACCACGTCCTTATTGGAATAATAAGCTACTT  
GCCTTGAGTTTATAATTCAGGGTGGTAAAGTATGTTTTTAAATTTTAAAAAGCAGCTGCATTTTTTATTT  
AGTTGGAATATCACCCAATTTTTTATTTTTATTGCTATTAATAATATCCACTAGATGCCACCTAGAGCTCC  
AGTTCTTTATAACAAAACAGGGATCTGTTGAACACTTACTGTTGTTTTTTTTTTTTTACATGTTTCCAT  
CATTTCTGTCTTTAAGAACTAATTCGTACATAATAAGTTTCATAGGTAACACATTATTTGAAGTTACAGC  
TACAGTAGTCAGGTGTAGAAAATCTTGAGTTGCTTTGGTCTGCTTGCTTCATAAATTTATTCTCTTATG  
ATACTTGAGGTACCAGTTGTATTTAATTTTATTCATTATCCCTAGATAGCTATTAAGATACTTAGATTAG  
ACCTAACCACCATAGTCAATCCAAGACTAGACTACTCAATATTAAGGGTCTGGAAAATAGAAGAGTGT  
GTTGGGCAGGTAGTTTGTACCATTTATGAAGGTTTGTCCTTTGTTAAATTTAGCAGCCTGTACTAGCTT  
TTGAAATCCAGAAGTTTTAACTTCCAGTGGCTGGTTTCTGAGAGAGTGCCATGATTGCTAGCCAGCATT  
CATATTGGGAATATGTAGAGGAGAACCTGGATGTACTTAAGAGTGGCATATAATTTTCACTTCTGTCTGT  
TGAGGCATCAAAAAACAAGTTTAGAAAGCTGGCAACATGAAGAATGCATTCAAATATAACAGGTGCTT  
CTTTGTTGTACGCAGAGGAATTTTTCTTTTGATTTGTTTACTGAAATTTGTTATACTTCAAAAGCCAT  
AACTTGAAAAATACTGGTGGCGTCGATGGTGAGTGATTTTTATCCACGTGGGCCTTTTGCTCAGTTCCA  
TGGCAATTTTGTAATTGACCCTAGCCAGAGAATAGATCAGTATTTCACTGATACCACGAGGAAAAGAAC  
AAACAAAACCTAAAAGTATTCATACACCTTGCTAACCTAAAAGACAGCAGGGACAAGATACATATGAGGA  
CAAGGTATACACCCAGTTCTGAATAACTTGAAGAACAGGCTTGGCAAAGAAGTAAGTTTATCCAAATCTT  
GAATTTCTGCCAGGCATGGTAGCTCATGCCTGTAACCCTGGCACTTAAGGGGCCAAGGCAGGAGGATCAC  
TTGAGGCCAGTGAGCTGTGATCACTCCAGTGCACTCGAGCCTGGGTGACAGGGCAAGACCCTGTCTCAAA  
AAAAAAAAAAAAAACCAAAATCTTGAATCTCCCATCAAAGCCTTTTCATTAAAAATACAATTTATCTA  
CTCCCTACTGTACCTTTCACTGATGTCAAGTGGCTATCAATTCATATAGCTGAAAATTAGTGATAGTTTG  
GGTCTCATTTATGCATAAATTAATTGAAAATCAGTAATGGCCAGGAAGAAATATGAATATTCAAACCACT  
TTTTTCTTTTTTTTTTTTTTTTTTTTGGCAAATGGTGTTATATTGCCTGGGCAGGTCTCGAAATCCTGGGC  
TCAAGCTATCCTCCTGCCTCTGCCTCTGTAAGAGTGTGAGCCACCATGCCCCACCAAACCATTTTTTCAT  
ATCAGTTATAGCAAAACAAGACAAACCAGTTCTTAATAATGTTCAAAGTTGGACCCATAGAGACATGCTA

AGCACTACATCATGCTAAGAAGAACAGTTATTACTCAGCTGCCATACTTCAGCCATTCTACTTTTACACC  
AAGAACAAAATGGCTAGAGATTTTTTTAAAAATACAAATGCCAGTACCTTGCCGAGACTTGTTCACTGAT  
TTGCCCCAACCCCAAGGTAATGGTCATCTACTTTGCAACCTATGGAGATCCTGATAGCTCCCATACAAAG  
TGAGGTACACTGTTGCCAATTTGGAGGCAGGAAGCCATCAAACCTAAACGTAGTTTAATTCAGATGAACAC  
CTATCGATATTCAAAAGGCAAAACAAAAAACTAATTCCAGGGACATTAGACCTTGGTGAAATGCCAAAT  
GGAAAATGGTGCTTTAAAAGGTAGTCTCTTACCATATAAGGAATAAGTAAACATTAGCTTGTGATTTCT  
CATTATTCAGGTCAATGTTTTAGACACGACTAACAAGGGACAGTTCAAACCTATTAAGAGAACAAATTTT  
TACTTAAGCACTTTGAGGTATCCACTCCCCTTAAATGTAAGTTATGTATTTTATCTGTTGATTAAGGGGA  
GGTCCAAGCATTTGTACTTGGCAGGAATGCTGGCAATAGCTTGTGCCAGATTACTGTATAAACTTGAAAG  
TAATAAAAATGTTCTTTAAAAGTA

>NM\_004095.4 Homo sapiens eukaryotic translation initiation factor 4E binding protein 1 (EIF4EBP1), mRNA

AGGGCAGCGAGAGGTTTCGCGGGTGCAGCGCACAGGAGACCATGTCCGGGGGCAGCAGCTGCAGCCAGACC  
CCAAGCCGGGCCATCCCCGCCACTCGCCGGGTGGTGCTCGGCGACGGCGTGCAGCTCCCGCCGGGGACT  
ACAGCACGACCCCCGGCGGCACGCTCTTCAGCACCAACCCCGGGAGGTACCAGGATCATCTATGACCGGAA  
ATTCCTGATGGAGTGTGGAACCTCACCTGTGACCAAAACACCCCCAAGGGATCTGCCACCATTCGGGGG  
GTCACCAGCCCTTCAGTGATGAGCCCCCATGGAAGCCAGCCAGAGCCACCTGCGCAATAGCCCAGAAG  
ATAAGCGGGCGGGCGGTGAAGAGTCACAGTTTGAGATGGACATTTAAAGCACCAAGCCATCGTGTGGAGCA  
CTACCAAGGGGCCCTCAGGGCCTTCCTGGGAGGAGTCCCACCAGCCAGGCCTTATGAAAGTGATCATAC  
TGGGCAGGCGTTGGCGTGGGGTCGGACACCCAGCCCTTCTCCCTCACTCAGGGCACCTGCCCCCTCCT  
CTTCGTGAACACCAGCAGATACCTCCTTGTGCCTCCACTGATGCAGGAGCTGCCACCCCAAGGGGAGTGA  
CCCCTGCCAGCACACCCTGCAGCCAAGGGCCAGGAAGTGGACAAGAACGAACCCTTCCTTCCGAATGATC

AGCAGTTCAGCCCCTCGCTGCTGGGGGCGCAACCACCCCTTCTTAGGTTGATGTGCTTGGGAAAGCTC  
CCTCCCCCTCCTTCCCCAAGAGAGGAAATAAAAAGCCACCTTCGCCCTAGGGCCAAGA

>NM\_182917.4 Homo sapiens eukaryotic translation initiation factor 4 gamma 1 (EIF4G1), transcript variant 1, mRNA

TCACTTGCCTGAAACCGGCTCCTCGACGGCCGCCGCCCGCCTGGCCTTTAGGGCCTGACTCCCGCCCTT  
CCTGGCCTACACTCCTGGGCGGCGGCAGGCCTAGCTTCTGGCCCAGTGCGGGTTCCTCCGGCGGCAGGCGT  
ATCCTGTGTGCCCTGGGCCAGGCCCGAACCCTGTCTCCCGGGTGGGGGGTGGGGACGCCACGGCCGAA  
GCAGCTAGCTCCGTTCTGTATCCGGGAGCCTGGTGCCAGCGAGACCTGGAATTTCGGTCTGGTTGGTCT  
GGGGCCCCGCGGAGCCAGGTTGATACCCTCACCTCCCAACCCAGGCCCTCGGATGCCCAGAACCTGTAG  
GCCGCACCGTGGACTTGTTCTTAATCGAGGGGGTGTCTGGGGGGACCTGATGTGGCACCAAATGAAATGA  
ACAAAGCTCCACAGTCCACAGGCCCCCCACCCGCCCATCCCCGGACTCCACAGCCAGCGTTTCCCCC  
GGGGCAGACAGCGCCGGTGGTGTTCAGTACGCCACAAGCGACACAAATGAACACGCCTTCTCAGCCCCGC  
CAGCACTTCTACCCTAGCCGGGCCAGCCCCGAGCAGTGCAGCCTCCCGAGTGCAGAGTGCAGCCCCTG  
CCCGCCCTGGCCAGCTGCCCATGTCTACCCTGCTGGATCCCAAGTAATGATGATCCCTTCCAGATCTC  
CTACCCAGCCTCCAGGGGGCCTACTACATCCCTGGACAGGGGCGTTCCACATACGTTGTCCCGACACAG  
CAGTACCCTGTGCAGCCAGGAGCCCCAGGCTTCTATCCAGGTGCAAGCCCTACAGAATTTGGGACCTACG  
CTGGCGCCTACTATCCAGCCCAAGGGGTGCAGCAGTTTCCCACTGGCGTGGCCCCCGCCCCAGTTTTGAT  
GAACCAGCCACCCAGATTGCTCCCAAGAGGGAGCGTAAGACGATCCGAATTCGAGATCCAAACCAAGGA  
GGAAAGGATATCACAGAGGAGATCATGTCTGGGGCCCGCACTGCCTCCACACCCACCCCTCCCCAGACGG  
GAGGCGGTCTGGAGCCTCAAGCTAATGGGGAGACGCCCCAGGTTGCTGTCATTGTCCGGCCAGATGACCG  
GTCACAGGGAGCAATCATTGCTGACCGGCCAGGGCTGCCTGGCCCAGAGCATAGCCCTTCAGAATCCAG  
CCTTCGTCGCCTTCTCCGACCCCATCACCATCCCCAGTCTTGGAACCGGGGTCTGAGCCTAATCTCGCAG

TCCTCTCTATTCTGGGGACACTATGACAACTATACAAATGTCTGTAGAAGAATCAACCCCCATCTCCCC  
TGAAACTGGGGAGCCATATCGCCTCTCTCCAGAACCCTCTCTCGCCGAACCCATACTGGAAGTAGAA  
GTGACACTTAGCAAACCGTTCCAGAATCTGAGTTTTCTTCCAGTCCTCTCCAGGCTCCCACCCCTTTGG  
CATCTCACACAGTGGAATTCATGAGCCTAATGGCATGGTCCCATCTGAAGATCTGGAACCAGAGGTGGA  
GTCAAGCCCAGAGCTTGCTCCTCCCCAGCTTGCCCTCCGAATCCCCTGTGCCATTGCTCCAACTGCC  
CAACCTGAGGAACTGCTCAACGGAGCCCCCTCGCCACCAGCTGTGGACTTAAGCCCAGTCAGTGAGCCAG  
AGGAGCAGGCCAAGGAGGTGACAGCATCAATGGCGCCCCCACCATCCCCTCTGCTACTCCAGCTACGGC  
TCCTTCAGTACTTCCCCAGCTCAGGAGGAGGAAATGGAAGAAGAAGAAGAGGAAGAAGGAGAAGCA  
GGAGAAGCAGGAGAAGCTGAGAGTGAGAAAGGAGGAGAGGAACTGCTCCCCCAGAGAGTACCCCTATTC  
CAGCCAACTTGTCTCAGAATTTGGAGGCAGCAGCAGCCACTCAAGTGGCAGTATCTGTGCCAAAGAGGAG  
ACGGAAAATTAAGGAGCTAAATAAGAAGGAGGCTGTTGGAGACCTTCTGGATGCCTTCAAGGAGGCGAAC  
CCGGCAGTACCAGAGGTGGAATCAGCCTCCTGCAGGCAGCAATCCAGGCCCAGAGTCTGAGGGCAGTG  
GTGTGCCCCCACGTCCTGAGGAAGCAGATGAGACCTGGGACTCAAAGGAAGACAAAATTCACAATGCTGA  
GAACATCCAGCCCGGGGAACAGAAGTATGAATATAAGTCAGATCAGTGGAAGCCTCTAAACCTAGAGGAG  
AAAAACGTTACGACCGTGAGTTCCTGCTTGGTTTTTCAGTTCATCTTTGCCAGTATGCAGAAGCCAGAGG  
GATTGCCACATATCAGTGACGTGGTGCTGGACAAGGCCAATAAAACACCACTGCGGCCACTGGATCCCAC  
TAGACTACAAGGCATAAATTGTGGCCAGACTTCACTCCATCCTTTGCCAACCTTGCCCGGACAACCTT  
AGCACCCGTGGGCCCCCAAGGGGTGGGCCAGGTGGGGAGCTGCCCCGTGGGCCGAGGCTGGCCTGGGAC  
CCCGGCGCTCTCAGCAGGGACCCCGAAAAGAACCACGCAAGATCATTGCCACAGTGTTAATGACCGAAGA  
TATAAACTGAACAAAGCAGAGAAAGCCTGGAAACCCAGCAGCAAGCGGACGGCGGCTGATAAGGATCGA  
GGGGAAGAAGATGCTGATGGCAGCAAAACCCAGGACCTATTCCGCAGGGTGCGCTCCATCCTGAATAAAC  
TGACACCCAGATGTTCCAGCAGCTGATGAAGCAAGTGACGCAGCTGGCCATCGACACCGAGGAACGCCT  
CAAAGGGGTCATTGACCTCATTTTTGAGAAGGCCATTTAGAGCCCACTTCTCTGTGGCCTATGCCAAC  
ATGTGCCGCTGCCTCATGGCGCTGAAAGTGCCCACTACGGAAAAGCCAACAGTGACTGTGAACTTCCGAA  
AGCTGTTGTTGAATCGATGTCAGAAGGAGTTTGAGAAAGACAAAGATGATGATGAGGTTTTTGAGAAGAA

GCAAAAAGAGATGGATGAAGCTGCTACGGCAGAGGAACGAGGACGCCTGAAGGAAGAGCTGGAAGAGGCT  
CGGGACATAGCCCGGCGGCTCTTTAGGGAATATCAAGTTTATTGGAGAGTTGTTCAAACCTGAAGATGT  
TAACAGAGGCAATAATGCATGACTGTGTGGTCAAACCTGCTTAAGAACCATGATGAAGAGTCCCTTGAGTG  
CCTTTGTCGTCTGCTCACCACCATTGGCAAAGACCTGGACTTTGAAAAAGCCAAGCCCCGAATGGATCAG  
TATTTCAACCAGATGGAAAAATCATTAAAGAAAAGAAGACGTCATCCCGCATCCGCTTTATGCTGCAGG  
ACGTGCTGGATCTGCGAGGGAGCAATTGGGTGCCACGCCGAGGGGATCAGGGTCCCAAGACCATTGACCA  
GATCCATAAGGAGGCTGAGATGGAAGAACATCGAGAGCACATCAAAGTGCAGCAGCTCATGGCCAAGGGC  
AGTGACAAGCGTCGGGGCGGTCTCCAGGCCCTCCCATCAGCCGTGGACTTCCCCTTGTTGGATGATGGTG  
GCTGGAACACAGTTCCCATCAGCAAAGGTAGCCGCCCCATTGACACCTCACGACTACCAAGATCACCAA  
GCCTGGCTCCATCGATTCTAACAACCAGCTCTTTGCACCTGGAGGGCGACTGAGCTGGGGCAAGGGCAGC  
AGCGGAGGCTCAGGAGCCAAGCCCTCAGACGCAGCATCAGAAGCTGCTCGCCCAGCTACTAGTACTTTGA  
ATCGCTTCTCAGCCCTTCAACAAGCGGTACCCACAGAAAGCACAGATAATAGACGTGTGGTGCAGAGGAG  
TAGCTTGAGCCGAGAACGAGGCGAGAAAGCTGGAGACCGAGGAGACCGCCTAGAGCGGAGTGAACGGGGA  
GGGGACCGTGGGGACCGGCTTGATCGTGCGCGGACACCTGCTACCAAGCGGAGCTTCAGCAAGGAAGTGG  
AGGAGCGGAGTAGAGAACGGCCCTCCCAGCCTGAGGGGCTGCGCAAGGCAGCTAGCCTCACGGAGGATCG  
GGACCGTGGGCGGGATGCCGTGAAGCGAGAAGCTGCCCTACCCCCAGTGAGCCCCCTGAAGGCGGCTCTC  
TCTGAGGAGGAGTTAGAGAAGAAATCCAAGGCTATCATTGAGGAATATCTCCATCTCAATGACATGAAAG  
AGGCAGTCCAGTGCGTGCAGGAGCTGGCCTCACCTCCTTGCTCTTCATCTTTGTACGGCATGGTGTGCA  
GTCTACGCTGGAGCGCAGTGCCATTGCTCGTGAGCATATGGGGCAGCTGCTGCACCAGCTGCTCTGTGCT  
GGGCATCTGTCTACTGCTCAGTACTACCAAGGGTTGTATGAAATCTTGGAATTGGCTGAGGACATGGAAA  
TTGACATCCCCACGTGTGGCTCTACCTAGCGGAACTGGTAACACCCATTCTGCAGGAAGGTGGGGTGCC  
CATGGGGGAGCTGTTCAAGGAGATTACAAAGCCTCTGAGACCGTTGGGCAAAGCTGCTTCCCTGTTGCTG  
GAGATCCTGGGCCTCCTGTGCAAAAGCATGGGTCTAAAAAGGTGGGGACGCTGTGGCGAGAAGCCGGGC  
TTAGCTGGAAGGAATTTCTACCTGAAGGCCAGGACATTGGTGCATTGCTCGCTGAACAGAAGGTGGAGTA  
TACCCTGGGAGAGGAGTCGGAAGCCCCTGGCCAGAGGGCACTCCCCTCCGAGGAGCTGAACAGGCAGCTG

GAGAAGCTGCTGAAGGAGGGCAGCAGTAACCAGCGGGTGTTGCGACTGGATAGAGGCCAACCTGAGTGAGC  
AGCAGATAGTATCCAACACGTTAGTTCGAGCCCTCATGACGGCTGTCTGCTATTCTGCAATTATTTTTGA  
GACTCCCCTCCGAGTGGACGTTGCAGTGCTGAAAGCGCGAGCGAAGCTGCTGCAGAAATACCTGTGTGAC  
GAGCAGAAGGAGCTACAGGCGCTCTACGCCCTCCAGGCCCTTGTAAGTACCTTAGAACAGCCTCCCAACC  
TGCTGCGGATGTTCTTTGACGCACTGTATGACGAGGACGTGGTGAAGGAGGATGCCTTCTACAGTTGGGA  
GAGTAGCAAGGACCCCGCTGAGCAGCAGGGCAAGGGTGTGGCCCTTAAATCTGTCACAGCCTTCTTCAAG  
TGGCTCCGTGAAGCAGAGGAGGAGTCTGACCACAACTGAGGGCTGGTGGGGCCGGGGACCTGGAGCCCCA  
TGGACACACAGATGGCCCGGCTAGCCGCCTGGAAGTGCAGGGGGGCGGCAGCAGCGGCGGTGGCAGTGGGT  
GCCTGTAGTGTGATGTGTCTGAACTAATAAAGTGGCTGAAGAGGCAGGATGGCTTGGGGCTGCCTGGGCC  
CCCCTCCAGGATGCCGCCAGGTGTCCCTCTCCTCCCCCTGGGGCACAGAGATATATTATATATAAAGTCT  
TGAAATTTGGTGTGTCTTGGGGTGGGGAGGGGCACCAACGCCTGCCCCTGGGGTCCTTTTTTTTATTTTC  
TGAAATCACTCTCGGGACTGCCGTCCTCGCTGCTGGGGGCATATGCCCCAGCCCCTGTACCACCCCTGC  
TGTTGCCTGGGCAGGGGGAAGGGGGGGCACGGTGCCTGTAATTATTAACATGAATTCAATTAAGCTCAA  
AAAAAAAAAAAAAAAAA

>NM\_004448.4 Homo sapiens erb-b2 receptor tyrosine kinase 2 (ERBB2), transcript variant 1, mRNA

CCCCTCCATTGGGACCGGAGAAACCAGGGGAGCCCCCGGGCAGCCGCGCGCCCTTCCCACGGGGCCCT  
TACTGCGCCGCGCGCCCGGCCCCACCCCTCGCAGCACCCCGCGCCCGCGCCCTCCCAGCCGGGTCCA  
GCCGAGCCATGGGGCCGGAGCCGCACTGAGCACCATGGAGCTGGCGGCCTTGTCGCGCTGGGGGCTCCT  
CCTCGCCCTCTTGCCCCCGGAGCCGCGAGACCCAAGTGTGCACCGGCACAGACATGAAGCTGCGGCTC  
CCTGCCAGTCCCAGACCCACCTGGACATGCTCCGCCACCTCTACCAGGGCTGCCAGGTGGTGCAGGGAA  
ACCTGGAACCTACCTACCTGCCACCAATGCCAGCCTGTCTTCTGCAGGATATCCAGGAGGTGCAGGG

CTACGTGCTCATCGCTCACAACCAAGTGAGGCAGGTCCCACTGCAGAGGCTGCGGATTGTGCGAGGCACC  
CAGCTCTTTGAGGACAACTATGCCCTGGCCGTGCTAGACAATGGAGACCCGCTGAACAATACCACCCCTG  
TCACAGGGGCTCCCCAGGAGGCCTGCGGGAGCTGCAGCTTCGAAGCCTCACAGAGATCTTGAAAGGAGG  
GGTCTTGATCCAGCGGAACCCCCAGCTCTGCTACCAGGACACGATTTTGTGGAAGGACATCTTCACAAG  
AACAACCAGCTGGCTCTCACTGATAGACACCAACCGCTCTCGGGCCTGCCACCCCTGTTCTCCGATGT  
GTAAGGGCTCCCGCTGCTGGGGAGAGAGTTCTGAGGATTGTCAGAGCCTGACGCGCACTGTCTGTGCCGG  
TGGCTGTGCCCGCTGCAAGGGGCCACTGCCCACTGACTGCTGCCATGAGCAGTGTGCTGCCGGCTGCACG  
GGCCCCAAGCACTCTGACTGCCTGGCCTGCCTCCACTTCAACCACAGTGGCATCTGTGAGCTGCACTGCC  
CAGCCCTGGTCACCTACAACACAGACACGTTTGAGTCCATGCCAATCCCGAGGGCCGGTATACATTCGG  
CGCCAGCTGTGTGACTGCCTGTCCCTACAACTACCTTTCTACGGACGTGGGATCCTGCACCCTCGTCTGC  
CCCTGCACAACCAAGAGGTGACAGCAGAGGATGGAACACAGCGGTGTGAGAAAGTGCAGCAAGCCCTGTG  
CCCGAGTGTGCTATGGTCTGGGCATGGAGCACTTGCGAGAGGTGAGGGCAGTTACCAGTGCCAATATCCA  
GGAGTTTGCTGGCTGCAAGAAGATCTTTGGGAGCCTGGCATTCTGCCGGAGAGCTTTGATGGGGACCCA  
GCCTCCAACACTGCCCCGCTCCAGCCAGAGCAGCTCCAAGTGTTTGAGACTCTGGAAGAGATCACAGGT  
ACCTATACATCTCAGCATGGCCGGACAGCCTGCCTGACCTCAGCGTCTTCCAGAACCTGCAAGTAATCCG  
GGGACGAATTCTGCACAATGGCGCCTACTCGCTGACCCTGCAAGGGCTGGGCATCAGCTGGCTGGGGCTG  
CGCTCACTGAGGGAACTGGGCAGTGGACTGGCCCTCATCCACCATAACACCCACCTCTGCTTCGTGCACA  
CGGTGCCCTGGGACCAGCTCTTTCGGAACCCGCACCAAGCTCTGCTCCACACTGCCAACCGGCCAGAGGA  
CGAGTGTGTGGGCGAGGGCCTGGCCTGCCACCAGCTGTGCGCCCGAGGGCACTGCTGGGGTCCAGGGCCC  
ACCCAGTGTGTCAACTGCAGCCAGTTCCTTCGGGGCCAGGAGTGCGTGGAGGAATGCCGAGTACTGCAGG  
GGCTCCCCAGGGAGTATGTGAATGCCAGGCACTGTTGCCGTGCCACCCTGAGTGTGAGCCCCAGAATGG  
CTCAGTGACCTGTTTTGGACCGGAGGCTGACCAGTGTGTGGCCTGTGCCCACTATAAGGACCCTCCCTTC  
TGCGTGGCCCGCTGCCCCAGCGGTGTGAAACCTGACCTCTCCTACATGCCCATCTGGAAGTTTCCAGATG  
AGGAGGGCGCATGCCAGCCTTGCCCCATCAACTGCACCCACTCCTGTGTGGACCTGGATGACAAGGGCTG  
CCCCGCCGAGCAGAGAGCCAGCCCTCTGACGTCCATCATCTCTGCGGTGGTTGGCATTCTGCTGGTCGTG

GTCTTGGGGGTGGTCTTTGGGATCCTCATCAAGCGACGGCAGCAGAAGATCCGGAAGTACACGATGCGGA  
GACTGCTGCAGGAAACGGAGCTGGTGGAGCCGCTGACACCTAGCGGAGCGATGCCCAACCAGGCGCAGAT  
GCGGATCCTGAAAGAGACGGAGCTGAGGAAGGTGAAGGTGCTTGGATCTGGCGCTTTTGGCACAGTCTAC  
AAGGGCATCTGGATCCCTGATGGGGAGAATGTGAAAATTCCAGTGGCCATCAAAGTGTGAGGGAAAAACA  
CATCCCCCAAAGCCAAAGAAATCTTAGACGAAGCATACGTGATGGCTGGTGTGGGGCTCCCCATATGT  
CTCCCGCCTTCTGGGCATCTGCCTGACATCCACGGTGCAGCTGGTGACACAGCTTATGCCCTATGGCTGC  
CTCTTAGACCATGTCCGGGAAAACCGCGGACGCTGGGCTCCCAGGACCTGCTGAACTGGTGTATGCAGA  
TTGCCAAGGGGATGAGCTACCTGGAGGATGTGCGGCTCGTACACAGGGACTTGGCCGCTCGGAACGTGCT  
GGTCAAGAGTCCCAACCATGTCAAATTACAGACTTCGGGCTGGCTCGGCTGCTGGACATTGACGAGACA  
GAGTACCATGCAGATGGGGGCAAGGTGCCCATCAAGTGGATGGCGCTGGAGTCCATTCTCCGCCGGCGGT  
TCACCCACCAGAGTGATGTGTGGAGTTATGGTGTGACTGTGTGGGAGCTGATGACTTTTGGGGCCAAACC  
TTACGATGGGATCCCAGCCCGGGAGATCCCTGACCTGCTGGAAAAGGGGGAGCGGCTGCCCCAGCCCCC  
ATCTGCACCATTGATGTCTACATGATCATGGTCAAATGTTGGATGATTGACTCTGAATGTCGGCCAAGAT  
TCCGGGAGTTGGTGTCTGAATTCTCCCGCATGGCCAGGGACCCCCAGCGCTTTGTGGTCATCCAGAATGA  
GGACTTGGGCCCAGCCAGTCCCTTGGACAGCACCTTCTACCGCTCACTGCTGGAGGACGATGACATGGGG  
GACCTGGTGGATGCTGAGGAGTATCTGGTACCCCAGCAGGGCTTCTTCTGTCCAGACCCTGCCCCGGGCG  
CTGGGGGCATGGTCCACCACAGGCACCGCAGCTCATCTACCAGGAGTGGCGGTGGGGACCTGACACTAGG  
GCTGGAGCCCTCTGAAGAGGAGGCCCCCAGGTCTCCACTGGCACCTCCGAAGGGGCTGGCTCCGATGTA  
TTTGATGGTGACCTGGGAATGGGGGCAGCCAAGGGGCTGCAAAGCCTCCCCACACATGACCCCAGCCCTC  
TACAGCGGTACAGTGAGGACCCACAGTACCCCTGCCCTCTGAGACTGATGGCTACGTTGCCCCCTGAC  
CTGCAGCCCCCAGCCTGAATATGTGAACCAGCCAGATGTTGCGCCCCAGCCCCCTTCGCCCCGAGAGGGC  
CCTCTGCCTGCTGCCCCGACCTGCTGGTGCCACTCTGGAAAGGCCCAAGACTCTCTCCCCAGGGAAGAATG  
GGGTCGTCAAAGACGTTTTTGCCTTTGGGGGTGCCGTGGAGAACCCCGAGTACTTGACACCCCAGGGAGG  
AGCTGCCCCCTCAGCCCCACCTCCTCCTGCCTTCAGCCCAGCCTTCGACAACCTCTATTACTGGGACCAG  
GACCCACCAGAGCGGGGGGCTCCACCCAGCACCTTCAAAGGGACACCTACGGCAGAGAACCCAGAGTACC

TGGGTCTGGACGTGCCAGTGTGAACCAGAAGGCCAAGTCCGCAGAAGCCCTGATGTGTCCTCAGGGAGCA  
GGGAAGGCCTGACTTCTGCTGGCATCAAGAGGTGGGAGGGCCCTCCGACCACTTCCAGGGGAACCTGCCA  
TGCCAGGAACCTGTCCTAAGGAACCTTCCTCCTGCTTGAGTTCCAGATGGCTGGAAGGGGTCCAGCCT  
CGTTGGAAGAGGAACAGCACTGGGGAGTCTTTGTGGATTCTGAGGCCCTGCCCAATGAGACTCTAGGGTC  
CAGTGGATGCCACAGCCCAGCTTGGCCCTTTCCTTCCAGATCCTGGGTACTGAAAGCCTTAGGGAAGCTG  
GCCTGAGAGGGGAAGCGGCCCTAAGGGAGTGTCTAAGAACAAAAGCGACCCATTCAGAGACTGTCCCTGA  
AACCTAGTACTGCCCCCATGAGGAAGGAACAGCAATGGTGTCAGTATCCAGGCTTTGTACAGAGTGTCTT  
TTCTGTTTAGTTTTACTTTTTTGTGTTTTTAAAGATGAAATAAAGACCCAGGGGGAGAATGGG  
TGTTGTATGGGGAGGCAAGTGTGGGGGGTCTTCTCCACACCCACTTTGTCCATTTGCAAATATATTTTG  
GAAAACA

>NM\_001433.5 Homo sapiens endoplasmic reticulum to nucleus signaling 1 (ERN1), mRNA

GCTGCCTAGTCAGTTCTGCGTCCGCTGAGGCTCGGTCACCGCCTCGCTGTCGTCGCGGCGCCCCGCCCC  
GTCCTCTGTCCGTACCGCCCCGGAGCCAGGGCCGAGTCTCGCCATGCCGGCCCGGCGGCTGCTGCTGC  
TGCTGACGCTGCTGCTGCCCCGCCCTCGGGATTTTTGGAAGTACCAGCACAGTGACGCTTCCTGAAACCTT  
GTTGTTTGTGTCAACGCTGGATGGAAGTTTGCATGCTGTCAGCAAGAGGACAGGCTCAATCAAATGGACT  
TTAAAAGAAGATCCAGTCCTGCAGGTCCCAACACATGTGGAAGAGCCTGCCTTTCTCCAGATCCTAATG  
ATGGCAGCCTGTATACGCTTGGAAGCAAGAATAATGAAGGCCTGACGAACTTCCTTTTACCATCCCAGA  
ATTGGTGCAGGCATCCCCATGCCGAAGTTCAGATGGAATCCTCTACATGGGTAAAAAGCAGGACATCTGG  
TATGTTATTGACCTCCTGACCGGAGAGAAGCAGCAGACTTTGTCATCGGCCTTTCAGATAGTCTCTGCC  
CATCAACCTCTCTTCTGTATCTTGGGCGAACAGAATACACCATCACCATGTACGACACCAAAACCCGAGA  
GCTCCGGTGAATGCCACCTACTTTGACTATGCGGCCTCACTGCCTGAGGACGACGTGGACTACAAGATG  
TCCCACTTTGTGTCCAATGGTGTGGGCTGGTGGTGAAGTGTGGACAGTGAATCTGGGGACGTCTGTGGA

TCCAAAACACTACGCCTCCCCTGTGGTGGCCTTTTATGTCTGGCAGCGGGAGGGTCTGAGGAAGGTGATGCA  
CATCAATGTCGCTGTGGAGACCCTGCGCTATCTGACCTTCATGTCTGGGAGGTGGGGCGCATCACAAAG  
TGGAAGTACCCGTTCCCCAAGGAGACAGAGGCCAAGAGCAAGCTGACGCCCACTCTGTATGTTGGGAAAT  
ACTCTACCAGCCTCTATGCCTCTCCCTCAATGGTACACGAGGGGGTTGCTGTCGTGCCCCGCGGCAGCAC  
ACTTCCTTTGCTGGAAGGGCCCCAGACTGATGGCGTCACCATTGGGGACAAGGGGGAGTGTGTGATCACG  
CCCAGCACGGACGTCAAGTTTGATCCCGGACTCAAAGCAAGAACAAGCTCAACTACTTGAGGAATTACT  
GGCTTCTGATAGGACACCATGAAACCCCACTGTCTGCGTCTACCAAGATGCTGGAGAGATTTCCAACAA  
TCTACCCAAACATCGGGAAAATGTGATTCTGCTGATTCAGAGAAAAAGAGCTTTGAGGAAGTTATCAAC  
CTGGTTGACCAGACTTCAGAAAACGCACCTACCACCGTGTCTCGGGATGTGGAGGAGAAGCCCCGCCATG  
CCCCTGCCCCGCCCCGAGGCCCGTGGACTCCATGCTTAAGGACATGGCTACCATCATCCTGAGCACCTT  
CCTGCTGATTGGCTGGGTGGCCTTCATCATCACCTATCCCCTGAGCATGCATCAGCAGCAGCAGCTCCAG  
CACCAGCAGTTCCAGAAGGAACTGGAGAAGATCCAGCTCCTGCAGCAGCAGCAGCAGCAGCTGCCCTTCC  
ACCCACCTGGAGACACGGCTCAGGACGGCGAGCTCCTGGACACGTCTGGCCCGTACTCAGAGAGCTCGGG  
CACCAGCAGCCCCAGCACGTCCCCAGGGCCTCCAACCACTCGCTCTGCTCCGGCAGCTCTGCCTCCAAG  
GCTGGCAGCAGCCCCTCCCTGGAACAAGACGATGGAGATGAGGAAACCAGCGTGGTGATAGTTGGGAAAA  
TTTCCTTCTGTCCAAGGATGTCCTGGGCCATGGAGCTGAGGGCACAATTGTGTACCGGGGCATGTTTGA  
CAACCGCGACGTGGCCGTGAAGAGGATCCTCCCCGAGTGTTTTAGCTTCGCAGACCGTGAGGTCCAGCTG  
TTGCGAGAATCGGATGAGCACCCGAACGTGATCCGCTACTTCTGCACGGAGAAGGACCGGCAATTCCAGT  
ACATTGCCATCGAGCTGTGTGCAGCCACCCTGCAAGAGTATGTGGAGCAGAAGGACTTTGCGCATCTCGG  
CCTGGAGCCCATCACCTTGCTGCAGCAGACCACCTCGGGCCTGGCCACCTCCACTCCCTCAACATCGTT  
CACAGAGACCTAAAGCCACACAACATCCTCATATCCATGCCCAATGCACACGGCAAGATCAAGGCCATGA  
TCTCCGACTTTGGCCTCTGCAAGAAGCTGGCAGTGGGCAGACACAGTTTCAGCCGCCGATCTGGGGTGCC  
TGGCACAGAAGGCTGGATCGCTCCAGAGATGCTGAGCGAAGACTGTAAGGAGAACCCTACCTACACGGTG  
GACATCTTTTCTGCAGGCTGCGTCTTTTACTACGTAATCTCTGAGGGCAGCCACCCTTTTGGCAAGTCCC  
TGCAGCGGCAGGCCAACATCCTCCTGGGTGCCTGCAGCCTTGACTGCTTGACCCAGAGAAGCACGAAGA

CGTCATTGCACGTGAATTGATAGAGAAGATGATTGCGATGGATCCTCAGAAACGCCCCTCAGCGAAGCAT  
GTGCTCAAACACCCGTTCTTCTGGAGCCTAGAGAAGCAGCTCCAGTTCTTCCAGGACGTGAGCGACAGAA  
TAGAAAAGGAATCCCTGGATGGCCCGATCGTGAAGCAGTTAGAGAGAGGCGGGAGAGCCGTGGTGAAGAT  
GGACTGGCGGGAGAACATCACTGTCCCCCTCCAGACAGACCTGCGTAAATTCAGGACCTATAAAGGTGGT  
TCTGTCAGAGATCTCCTCCGAGCCATGAGAAATAAGAAGCACCCTACCGGGAGCTGCCTGCAGAGGTGC  
GGGAGACGCTGGGGTCCCTCCCCGACGACTTCGTGTGCTACTTCACATCTCGCTTCCCCCACCTCCTCGC  
ACACACCTACCGGGCCATGGAGCTGTGCAGCCACGAGAGACTCTTCCAGCCCTACTACTTCCACGAGCCC  
CCAGAGCCCCAGCCCCAGTGA CTCCAGACGCCCTCTGAGCGAGGGCGGGCCCTCTGTTCTGGTGGCCCC  
AGCTGTGACTGAGGGCCTGGTCACCACAATTAGAGCTTGATGCCTCCCGGCTTTGCAGGGAGACCAGGCT  
TCCCAAACCAAGTGCCTTGAGCTGCCTGCTCTGCAGCCACAGAGGACAGTGCTGACCCAGGAAGTGGG  
AGAAGTGGCCCCCTCGTGACCTACAGGGAAGTGGGAAGATGCTGGCCCCAAAAGCCTTACGGTCATGATGT  
CTGCAAAGGAGGGCCTCAGAGACAGCGGAGTAGCACCCCCAGCCATCTACTGGATAAACTTGCTTCAGA  
CTTTTTAAATTCCTGCTTAATGTCAGTCTACAGGCCTTTCAGGAAGGGAGAGGAGGGAATCGTACATTTT  
GCTTGCGTGCTGGGACAGCTAGGCTGAGATGCACCAAGTACAGCCTTCACTGGAGACCGGAATTGAGAGG  
TGGGGGATGCTGAGGAGGGGGAGGACGGAGTTCAGAGGGTGTCGTCCTGCAGTGTGAGATTTCTCATTGA  
TCACAGATGTGCCAGAGTAGCCCAGGTCACTGTAACTAGTGTTTCTGCAGAGGCAGCAGGAGCCATGA  
GCATGAGGTGTGGCATTAGGGACTGGTCAGCTATGCATGCTGGCAGGTGGGGTTGTGTCTGCAGGTCTCA  
GAAATGAAGAGGCTGCTCTGTTCTGGAGGCAGCCGTGGCCCAGTGCCAGTGGCCAGAACAGTGGCCTTTG  
GTGGGTGTGTCCCGGGCCATCTCGGGGTGGTGTCTCAGGAGCGCCTGGGGCAAGAGGTAAAGAGTTCCCTG  
GCCTTCAAGGAGAGCAGCGAAGACCCAGACAGGGGCCAGCCTTCAGGACCAGAGGGAGGCCGCCGAATGG  
GACCCTCCTGGTCACCAGGAGAAAGCCCTGGGCCAGCGAGTAGGCAGTCAAACCTCCTCGTCCCCAAGGC  
CGGTGGAACAAGAGGCTCGTGGTGAGTCAGGGCCAGGGTGGGTGGCCAAGGCCAGGGTCACCGTGTGCTT  
CATGGGCCAGCTTTTTTGTCTTCTGGCAAATTTAATAACTATATTTTGATTATACTGTAGAATGCTA  
TGTCAGCATAAGTAAGCTAACTTGAAGCTTCTTGTGAAGAATAAATGCAAGATAGAATACATCTTCTA  
TTTTTTGTGGTACCAAAAATCACCATCCCCTCAAGAGTGTTTCATGTATAGAACATTCTCTAATGCTGAAG

AGTAAAACATTATAGCAACACTATGTAAATGTATTGAACAGTATCAAAGAAATAGTCTCTAAATTGTTTG  
TACCATATTTTTTTTTCTAAACTTAACATAATTTTAGCTTTAGTTTCAGTCAAAACTTTGTCTTTTCTC  
TCCCGAGAGCCTTAGAGGTTAAATGCAATCAGCCTACCGTGTAAGGAGATGTTGTCCATGTACTTTCTC  
CAGCCAGTTGGGGGATCATTGCAGCTCAGGCCTGGTGAACCTCAGAGATTCCATTCAGTATTAAGAATGGG  
ATTGTTGAATTTTACTCACAGAGAAATCACTGTTTCTTCATGTTGTAAGATGTTTTCTGTTTGTGTATTT  
GTATCATGGTTACTCATCAAAAGCTCTCATTCTGCCTTTGTAGAATTCAGTTCCTTCCTTTCATCATAG  
CTAAAGTGACTTTTTTCCCTACTATTAACGTGATCCTACATCCTTAAATCTCATCGATTACCTCACTTAG  
GCCTTGGAACCTTGCCCTTGGTCGGTGTCTTGGCGTCTTCTAAGCAAGGCTGTGCGTTGTTTCAGAAAC  
GTGGCCAGACCGCATTTCTGCTGCTCCCATGCCGCATGCCAGGTGGCCTGAGACAGAGCTCCCCATACG  
GCTGCAAGGTGCTTTACCTGTGGGCTTTGGCAGTAACCCAAGAGAGGATCAGAAGGTGGAGAAGGTGCCA  
CGAGTGATTTAACAGGCCTGCCACAGGGAGTGCCCCCAGCCCAGCTCGTTCTCAGCACAGGTTTTCTCTT  
TGGGAGTACCCAGGTGATTTCTAGTGACCCAATTTTGTGCATCTCCCTGTTTTAGCCCCACTTGCCTAG  
AGACAACTGTTTCCGATGCCTTTTCTGCTTATCATACTAGTTTCTAACCACGCAGATTTCTCAAAATCAT  
TTATTCAATGTATTTTATTTGAGCACTTAGTGTATTGAGCTAGGCAGGATATAGGGTGCCGGAGATACAG  
CGATGAACAAGACAGGCCAAACTTCTGCTTTCCTAAACTTGTGATGAGAGAGAACAATAAAAAAGTGTT  
GCTGCCACAAAGAAACCAAGTGTGTGGGGAAGGGCGCGTGTTTGCGGTTTACATCTCTTCTGTCCCAGA  
ATCACAGGGATCTGGTCCGGTCACCTCTGGTCTTTCCTCTTAGTCGCCTTAGGAGCCCTGGTTCCCGTC  
CATCCTCTGGGGGGTTTGTGTTGAAGAGATCTCGTGTGGGTACTTGTCATGAAAACACCTTGGGCATCATC  
TGGTGTATCCAGTTCTAGTCTCGAGAAATCTGGTTTCCCACTGTGCTCAGCAAGTGGAAGTTCTTTTCA  
GGCCAGAACAGCTCTGCACCATCACATATCGTGTTGCGGCTTAGCTGTTTGGTCTGTAGTTCAGGTTATG  
GGACTTCTCCAATCCTGGAAGGCTGTTGAGCTTTTAGAAGTACTGTACGCTATCTTCAAGATGGAGCTT  
GGTCACATCTGTTAGGAATCCAAAGGACACTATGACTTATTTAAATCTTGTCTTACTAAACCTCTCTTGG  
GCACGTGTGCCAGAATTTCTTGTGCTTCTTGAGTCTTTTAATTTAGTGTTTTTTCGTTTGTTTTT  
TGTTTTTTTGAGACAGAGTCTCGCTCTGTCAACCAGGCTGGAGTGCAAGTGGCACGACCTCAGCTCACTGC  
AACCTCCGCCTCCTTGGTTCAAGCAATTCTCCTGCCTCAGCCTCCCGAGTAGCTGGGATTACAGGTGTGT

GCCACCACGCTCGGCTAATTTTTATATTTTTTTAGTAGAGACGGGGTTTCCCATGTTAGGCAGGATG  
GTCTCGATCTCCTAACCTCGTGATCCGCTGCCTCAGCCTCCCAAAGTGCTGGGATTACAGGCTTGAGCC  
ACCGCACCCGGCCTAATCTCAGTTTTTGAAGTGCTCCACAAGTCATTAGGCACCAAAACATTTTCACCTG  
GGGAACACTGGCATTTCCTGATTAGCTGTGAAGCAATCTAGTGGCTAAGTGTGAAATCCTGGGTGCGCA  
GGTGTTCCTCACTCCCGCGTGTTCTCAGTGCAGTGGTGGTCAGAGGCCCTTCCAAGGAGACATCACTCTG  
ATCAGTTACAGATAGATGTTCTGGAAGATCTGCAGGTGAGTAGATCCAGCAGAGTTTCTTCCACCAACT  
CTAGAAGAAAGGGCCTTATCAGAGTTGACCCTGAGCCTTTGGTAAGGTTTTGTGTGCATGCGATTCAAGT  
ATCTTTGGCAATTCTTTTCTTGCTGCAGTGAGAGATTAATTGGTTGCTGATCAAACCGTTCATGCAGATG  
GGGGGACCTTTGGATTGTACGGCTTTCTCCTCTTGGCTGCTTTCTTTTCAGGAAGTTGGACTTTGGCCAG  
GTTTGGCTTTCCAGAGCCGTTCTTTCTCTGTCCTTTCTTGGGTCTCATGGTGTGCCATTGGATCC  
TTGGCCTTGTGATCCTCTGGGAACTGGGGGCCAGTTCCACTTTTGACGCTTCTGTGCTGGAAGAGAAGC  
CCAGCGCCCTGGAAGGAGCCTCTTTAAGTCCCCCATGTCGCTTCTCTCTGCTCTTTTAGTGTCTGAG  
ATTGCCTTTCTTTGAATTTCCAGTGTTTCTTTCTTGTCCCTTCCCTCACCAACCTGGAGTTATTTTG  
GTTGACTATGTCCTGGCTTTGGCTTCTCCTGGCAGGAAGTCATCAGGCATCCTCTCCAGGTGAGCCGAAA  
TTCCACCCTCCCAGGTTGGACATCATCTTTTAAACCAATGGTCTACTCCCCTCCTTCTTTATGAAACAG  
TGATTCCCCTGAGTAACTCTGGTTCTGATTTTTGTACCGGCGCTTAAATTCTTTCTGTAGACGTTGGA  
AAGCCACAAAGAACGTGACTGCAGTGAGCCTCCCACTGGAGCAGCCTTAACCAACACTTTGGCCAAAGCC  
CCCCACCTCCCCTGTGTACTGTGTGTGTGTTTGGTGGATACAGTATTCCTTTTCAGTGTCCCTAAAGCT  
GTGATGGGGAGTCCCCACTTACCTAGAAAGCATTACCAGTCACCTACTCTGCATTCTCAGATGTAAACCT  
TGTGTAGTGTTCTTTTGCAATGACCTATTTATTTAACCTATTTATTTATTTAATTTTACTCTGAAA  
TGTATCCAGTTACAATTGTACTTGCTTAAAGCACATCAGATTTGTTTTGGACAACACCCTTGACCATTTT  
AAACTGGAAAAGTGATACTGTATCCTTCCATGGGATGGATGCTTTACAGTAGTCTTATTATTAAAGGGT  
GATTAATTTGGTCGGGGTAAAATGTTAATTTTTAGGTGATTTTTAAGAATTCTGTGCCATTATGTCTTCT  
GTGTGGATGGTTAATTGTTTAATTAGTACGTGTTAATTGTGTGATACAGTCTTCTTTGTGGAACCCAAAA  
TCCTCTTTTAGCTTTATTTTTATAAACTGCCAGATTGTACAACCTTTATGTGCATTTTTAAAGCTTGA

AGACATGAGGGTCATTATCTAAGTTAAACAGCCTATTTTTGTGCCTCCTGTACAGTTTTATAATTCTGCT  
GATGGCGGCATCTTATGTCGAGCCAACCACAATAAAGGTAGTTTTAGATTTTGGGA

>NM\_014584.3 Homo sapiens endoplasmic reticulum oxidoreductase 1 alpha (ERO1A), transcript  
variant 2, mRNA

ATCTGAGGGCGCACGGCCCGCGACCGAGCGTGC GGACTGGCCTCCCAAGCGTGGGGCGACAAGCTGCCGG  
AGCTGCAATGGGCCGCGGCTGGGGATTCTTGT TTGGCCTCCTGGGCGCCGTGTGGCTGCTCAGCTCGGGC  
CACGGAGAGGAGCAGCCCCGGAGACAGCGGCACAGAGGTGCTTCTGCCAGGTTAGTGGTTACTTGGATG  
ATTGTACCTGTGATGTTGAAACCATTGATAGATT TAATAACTACAGGCTTTTCCAAGACTACAAAACT  
TCTTGAAAGTGACTACTTTAGGTATTACAAGGTAAACCTGAAGAGGCCGTGTCCTTCTGGAATGACATC  
AGCCAGTGTGGAAGAAGGGACTGTGCTGTCAAACCATGTCAATCTGATGAAGTTCCTGATGGAATTAAT  
CTGCGAGCTACAAGTATTCTGAAGAAGCCAATAATCTCATTGAAGAATGTGAACAAGCTGAACGACTTGG  
AGCAGTGGATGAATCTCTGAGTGAGGAAACACAGAAGGCTGTTCTTCAGTGGACCAAGCATGATGATTCT  
TCAGATAACTTCTGTGAAGCTGATGACATTCAGTCCCCTGAAGCTGAATATGTAGATTGCTTCTTAATC  
CTGAGCGCTACACTGGTTACAAGGGACCAGATGCTTGGAAAAATATGGAATGTCATCTACGAAGAAAACTG  
TTTTAAGCCACAGACAATTA AAAAGACCTTTAAATCCTTTGGCTTCTGGTCAAGGGACAAGTGAAGAGAAC  
ACTTTTACAGTTGGCTAGAAAGTCTCTGTGTAGAAAAAAGAGCATTCTACAGACTTATATCTGGCCTAC  
ATGCAAGCATTAAATGTGCATTTGAGTGCAAGATATCTTTTACAAGAGACCTGGTTAGAAAAGAAATGGGG  
ACACAACATTACAGAATTTCAACAGCGATTTGATGGAATTTTGACTGAAGGAGAAGGTCCAAGAAGGCTT  
AAGAACTTGTATTTTCTCTACTTAATAGAACTAAGGGCTTTATCCAAAGTGTTACCATTCTTCGAGCGCC  
CAGATTTTCAACTCTTTACTGGAAATAAAATTCAGGATGAGGAAAACAAAATGTTACTTCTGGAAATACT  
TCATGAAATCAAGTCATTTCTTTGCATTTTGATGAGAATTCATTTTTTGCTGGGGATAAAAAAGAAGCA  
CACAACTAAAGGAGGACTTTCGACTGCATTTTAGAAATATTTCAAGAATTATGGATTGTGTTGGTTGTT  
TTAAATGTCGTCTGTGGGGAAAGCTTCAGACTCAGGGTTTGGGCACTGCTCTGAAGATCTTATTTTCTGA

GAAATTGATAGCAAATATGCCAGAAAGTGGACCTAGTTATGAATTCCATCTAACCAGACAAGAAATAGTA  
TCATTATTCAACGCATTTGGAAGAATTTCTACAAGTGTGAAAGAATTAGAAAACCTCAGGAACTTGTTAC  
AGAATATTCATTAAAGAAAACAAGCTGATATGTGCCTGTTTCTGGACAATGGAGGCGAAAGAGTGGAATT  
TCATTCAAAGGCATAATAGCAATGACAGTCTTAAGCCAAACATTTTATATAAAGTTGCTTTTGTAAGGA  
GAATTATATTGTTTTAAGTAAACACATTTTTAAAAATTGTGTTAAGTCTATGTATAATACTACTGTGAGT  
AAAAGTAATACTTTAATAATGTGGTACAAATTTTAAAGTTTAATATTGAATAAAAGGAGGATTATCAAAT  
TCATATATGATAAAAGTGAATGTTCTAAGTCTCTCAAACCTAGCGTTTTATGTAATAATATGTAATATAAA  
TAAAACTATGGTAAATGTGACAAGCATTTAATAGGAAAATGCTAAGGAGGCCTCATAAATGACCCATAAT  
TACCAACGTAGAATTTTTCAGTACATTTAGGGTTGCTGGATTTAGCAAATAAAAAATAAGATTGCCCAGT  
TAGATTTGAATTTAGATAAAACAATTAGTTTTTTAATATTTTACATGGAATATTTGGAAAATACTTATAC  
TAAAAAATTATTTGTTTGAAATTCAAATTTAACTGGGAGTCTTGTATTTTATCTGGCAATCCTAAAATAC  
ATTGGTATGAAACAAATCACTTTTAGAAGTATATTGCTATTTTGATTGGGTTGTTTTGTGTGTAGAAAC  
GTACAATAACAACCTCAAAGGCACAGGAGATTTCTAAACATTGTGAAAAGTTGAATAGATTATATATTTAT  
TCTCATAATACTTTCACTAATACTAAATAAAATTTGGGGAACACTTTTTATTTTATATAATTTCCAATT  
TACAGAAAAGTTTCAAAAATAGTACAAAGAGCTCTCTTACCCAGATTCATAATTGTTTCATACGTGCTTT  
ATCTTTCATGCTTCTCTGTACACACACACACACACACAAATTTTCTCAATCATTTGAAAGTCAGTTA  
TAGGCATCATGCCCCTTAAACCCTAAATACTTCAGTGTGTAATACTGAATAATTACTAAAAATGATTTTC  
TCAGAAAAAAAACCTCCACAATTCTGGAACATAATACTGTAAAGCCTTAGAATAAATAATACTTTCAAG  
TTCCAATCTAAAGTTCTTTTTGAGTTTTGTTGCCCGTTTTATGCTTGATGTGTATAGTAATAGGGTAGGC  
TATTTATTTTATTAAAATTTTTTTAGAGACAAGTTTTGCTGTGTTGCCCAAGCTGGAACCTGAACGAC  
TGGGCTGAAGTGATCTTCCACCTCAGCCTCCCAAGTAGCTGGGAATACAGGTGTCTGCCACCATACCCA  
GTTTCATTTTTGTTTTTATACCCGAAGTTCATTTCTTTGCTCCCTAAAACCTGAACTGTAATTTTGGG  
AGGTTTTTCATTAGTGGAAGCTCTTCATTTATAAAGCTATTTGAAGGGGTTTAGGAATTTATATCACATGG  
TAATTGTAGAGAAAAAGAAGCTATATACCTCAAAATCGTGCCCTCTTACATATGTCTTATCAGGTATAA  
CATGTTGAAATGTCACATTAGTAGTAAAGTGGGGTTTATTTATATAGTGGTTAAGAAATGTCAGTTTACA

CTGCTGTATACTTCTTCTTCTGTGTCCCTAAGGCCTGGTACAGTGCCAAGCACATACTTGGTATCCAATA  
AATATTTGTTGGATGAATGTATGCATATGTATTCAGTATATTTTAAATGAATAATCACAGAAGTAAGTTT  
AATAATTTGTCCTATTTTTCTCTGTCACTTCCTTTTTCTCTAAGGCAGGAAAGGAAAGACATTAAACCAT  
TAATTAAGTCAATCCTCTTGAGACTCAAAAGACTATGAAGTGATCACTCTATATAAAATATAAATACAG  
TGTGGGTTCAAATGGCCATTTTTGTGTGTCCCTCTCTCATCTTATGCTTCCCTCCTTTTTTATTT  
TTATTTTTTGAGACGGAGTCTTGCTGTGTGCGCCAGGTTGGAGTGCAGTGGCGTGATCTTAGCTCACTG  
CAAGCTCTGCCTTCCAGGTTACGCCATTCTTCTGCCTCAGCCCCCTGAGTAGCTGGGACTACAGGCGCC  
CGCCACCACGCCCCGGCTAATTTTTTTTTTTTTTTTTGTATTTTAGTAGAGGCAGTGTTTCACCGTGT  
TAGCCAGGATGGTCTTGATCTCCTGACCTCGTGATCCACCCACCTCGACCTCCCAAAGTGCTGGGATTAC  
AGGCGTGAGCCACCACGCCCCGGCCTTTTTTTTTTAGCTGCCAATCTTTTGAAGGAATATTCTTACCT  
CTACTTTGTCACCTTCTACTGGCTCCTAACTAAAATCTGCCATTTGGCTCTCTGGTTAACAGTCCCTTC  
CTGTAAAGTCTAAAATCTTAATTCTAAATCCACAGTTTAATCACAAGCTAGTACTTGACTTTTTTTCTG  
TATTTGACATTTTGACAACCCCTACTTTAAAGATTTATTCCTTGACTTCTTACATTTTGCTCACTCCT  
GAACCACCCCCACCTTTTGGCCTCTTCATTTATTCCTTAAATGTTATTCCTCAGACCTCCATTTTTTT  
TTCTCTCTTAATCACAACCACTTCTCACGCTTGGGTAATTTTAATTCAGCAGTTCCTAAATCCTTATC  
TTAGCCAGACTCCTCAATCCATCTGCCTGTTGCATTTTCTTGGTTGTCCAGAGACACCTGTGTGTGT  
CTAAAACATTCACTCTCTGCAAAACCTACTCTAATGCCTGTGTCCCTTACTTTGGTTAATTTAGAACC  
ATTATATTCTAAGTTTTCTAGGCTCATTCCTCTCCTCCACCTCCCCTATCATTTAGTGTCTAAGTTT  
CTGATTTTATCTCCACCTCTCTGATACATCACTCTTTCATCTTCATTGCTATTATTAATAAATACCTACA  
GTACTAACCTGCCTCCTATACCTAGCTGGTCTCCTCTCTGTTGCTCAATGTTACCACAGCAGGCTTTCTA  
GAAGCACTCTGACAGTGTTACTCCCTAATATCCTTCAGTGACTTCAGGAACCTTCAGGAGAAAGCCAAAC  
TCCTCTGTTTGGTGTACAAGGTCTTCTGATGTGTTTCTCCACCGAATGTTCTGGTGAAACAGACTTACA  
CTTCTTCAGAAGCCACATTTGGCCAGGCCTCCCGCCTTGGTAAATGCTGTACTCTTTCATCAAGTATGC  
TAGTCATCCTTCCCCACTTGAAAAATCCTATGCATCTTGACGGCCTGACATAAGCATTTCTCTGTGAA  
ACCTCCTTTGCTCCACTCAAGGAGAGTCATCTAACTTCCACTTCGTGTCACTGTAATTACAACCTA

CCTCTATTGTATGTCACTTAAATCGTACTGTATTGTTTTATTTTTCAAAAGTCTTTACTAGAATGTGAGC  
TCCTTAAGGGCAGGAAAAGGAACCTTTTTATTTTTGCATCTCCATAGCATAGTTTTTGGCATATGAATG  
TTTAATAAATGTTTGTTGAATAAATTGATTTTAAAGTGACATCTTTATTATATTAGAGGTCCTACCTATA  
TTCCAAATACTTTCACTCCCTTCACTTTACAGCAAGGGTCAGTAGAGTCCCAAGGATTTGTAGACTTTAG  
GGGGTCAATAAAGCTGAAATTGTATTCAA

>NM\_003824.4 Homo sapiens Fas associated via death domain (FADD), mRNA

GCTCTTGTGATTTCCTGTAGTGAATCAGGCACCGAGTGCAGGTTGCGGGGTGGAATCCTTGGGCCGCT  
GGGCAAGCGGCGAGACCTGGCCAGGGCCAGCGAGCCGAGGACAGAGGGCGCACGGAGGGCCGGGCCGAG  
CCCCGGCCGCTTGCAGACCCGCCATGGACCCGTTCTGGTGCTGCTGCACTCGGTGTCGTCCAGCCTGT  
CGAGCAGCGAGCTGACCGAGCTCAAGTTCCTATGCCTCGGGCGCGTGGGCAAGCGCAAGCTGGAGCGCGT  
GCAGAGCGGCCTAGACCTCTTCTCCATGCTGCTGGAGCAGAACGACCTGGAGCCCGGGCACACCGAGCTC  
CTGCGCGAGCTGCTCGCTCCCTGCGGCGCCACGACCTGCTGCGGCGCGTCGACGACTTCGAGGCGGGGG  
CGGCGGCCGGGGCCGCGCCTGGGGAAGAAGACCTGTGTGCAGCATTTAACGTCATATGTGATAATGTGGG  
GAAAGATTGGAGAAGGCTGGCTCGTCAGCTCAAAGTCTCAGACACCAAGATCGACAGCATCGAGGACAGA  
TACCCCCGCAACCTGACAGAGCGTGTGCGGGAGTCACTGAGAATCTGGAAGAACACAGAGAAGGAGAACG  
CAACAGTGGCCACCTGGTGGGGGCTCTCAGGTCCTGCCAGATGAACCTGGTGGCTGACCTGGTACAAGA  
GGTTCAGCAGGCCCCGTGACCTCCAGAACAGGAGTGGGGCCATGTCCCCGATGTCATGGAATCAGACGCA  
TCTACCTCCGAAGCGTCCTGATGGGCCGCTGCTTTCGCTGGTGGACCACAGGCATCTACACAGCCTGGA  
CTTTGGTTCTCTCCAGGAAGGTAGCCAGCACTGTGAAGACCCAGCAGGAAGCCAGGCTGAGTGAGCCAC  
AGACCACCTGCTTCTGAACTCAAGCTGCGTTTATTAATGCCTCTCCCGCACCAGGCCGGGCTTGGGCCCT  
GCACAGATATTTCCATTTCTTCTCACTATGACACTGAGCAAGATCTTGTCTCCACTAAATGAGCTCCTG  
CGGGAGTAGTTGGAAAGTTGGAACCGTGTCCAGCACAGAAGGAATCTGTGCAGATGAGCAGTCACACTGT

TACTCCACAGCGGAGGAGACCAGCTCAGAGGCCAGGAATCGGAGCGAAGCAGAGAGGTGGAGAACTGGG  
ATTTGAACCCCGCCATCCTTCACCAGAGCCCATGCTCAACCACTGTGGCGTTCTGCTGCCCCTGCAGTT  
GGCAGAAAGGATGTTTTGTCCATTCCTTGGAGGCCACCGGGACAGACCTGGACACTAGGGTCAGGCGG  
GGTGCTGTGGTGGGGAGAGGCATGGCTGGGGTGGGGGTGGGGAGACCTGGTTGGCCGTGGTCCAGCTCTT  
GGCCCCTGTGTGAGTTGAGTCTCCTCTCTGAGACTGCTAAGTAGGGGCAGTGATGGTTGCCAGGACGAAT  
TGAGATAATATCTGTGAGGTGCTGATGAGTGATTGACACACAGCACTCTCTAAATCTTCCTTGTGAGGAT  
TATGGGTCCTGCAATTCTACAGTTTCTTACTGTTTTGTATCAAAATCACTATCTTTCTGATAACAGAATT  
GCCAAGGCAGCGGGATCTCGTATCTTTAAAAGCAGTCCTCTTATTCCTAAGGTAATCCTATTAACAC  
AGCTTTACAACTTCCATACTACAAAAA

>NM\_000043.6 Homo sapiens Fas cell surface death receptor (FAS), transcript variant 1, mRNA  
CTCTTCTCCCGCGGGTTGGTGGACCCGCTCAGTACGGAGTTGGGGAAGCTCTTCACTTCGGAGGATTGC  
TCAACAACCATGCTGGGCATCTGGACCCTCCTACCTCTGGTTCTTACGTCTGTTGCTAGATTATCGTCCA  
AAAGTGTTAATGCCCAAGTGACTGACATCAACTCCAAGGGATTGGAATTGAGGAAGACTGTTACTACAGT  
TGAGACTCAGAACTTGAAGGCCTGCATCATGATGGCCAATTCTGCCATAAGCCCTGTCCTCCAGGTGAA  
AGGAAAGCTAGGGACTGCACAGTCAATGGGGATGAACCAGACTGCGTGCCCTGCCAAGAAGGGAAGGAGT  
ACACAGACAAAGCCATTTTTCTTCAAATGCAGAAGATGTAGATTGTGTGATGAAGGACATGGCTTAGA  
AGTGGAATAAACTGCACCCGGACCCAGAATACCAAGTGCAGATGTAAACCAAACCTTTTTTGTAAGTCT  
ACTGTATGTGAACACTGTGACCCTGCACCAAATGTGAACATGGAATCATCAAGGAATGCACACTACCA  
GCAACACCAAGTGCAAAGAGGAAGGATCCAGATCTAACTGGGGTGGCTTTGTCTTCTTTTGGCAAT  
TCCACTAATTGTTTGGGTGAAGAGAAAGGAAGTACAGAAAACATGCAGAAAGCACAGAAAGGAAAACCAA  
GGTTCTCATGAATCTCCAACCTTAAATCCTGAAACAGTGGCAATAAATTTATCTGATGTTGACTTGAGTA

AATATATCACCCTATTGCTGGAGTCATGACACTAAGTCAAGTTAAAGGCTTTGTTTCGAAAGAATGGTGT  
CAATGAAGCCAAAATAGATGAGATCAAGAATGACAATGTCCAAGACACAGCAGAACAGAAAGTTCAACTG  
CTTCGTAATTGGCATCAACTTCATGGAAAGAAAGAAGCGTATGACACATTGATTAAAGATCTCAAAAAAG  
CCAATCTTTGTAATCTTGCAGAGAAAATTCAGACTATCATCCTCAAGGACATTACTAGTGACTCAGAAAA  
TTCAAACCTCAGAAATGAAATCCAAAGCTTGGTCTAGAGTGAAAAACAACAAATTCAGTTCTGAGTATAT  
GCAATTAGTGTGTTGAAAAGATTCTTAATAGCTGGCTGTAAATACTGCTTGGTTTTTTACTGGGTACATTT  
TATCATTTATTAGCGCTGAAGAGCCAACATATTTGTAGATTTTTAATATCTCATGATTCTGCCTCCAAGG  
ATGTTTAAAATCTAGTTGGGAAAACAACTTCATCAAGAGTAAATGCAGTGGCATGCTAAGTACCCAAAT  
AGGAGTGTATGCAGAGGATGAAAGATTAAGATTATGCTCTGGCATCTAACATATGATTCTGTAGTATGAA  
TGTAATCAGTGTATGTTAGTACAAATGTCTATCCACAGGCTAACCCCACTCTATGAATCAATAGAAGAAG  
CTATGACCTTTTGCTGAAATATCAGTTACTGAACAGGCAGGCCACTTTGCCTCTAAATTACCTCTGATAA  
TTCTAGAGATTTTACCATATTTCTAACTTTGTTTATAACTCTGAGAAGATCATATTTATGTAAAGTATA  
TGTATTTGAGTGCAGAATTTAAATAAGGCTCTACCTCAAAGACCTTTGCACAGTTTATTGGTGTATATT  
ATACAATATTTCAATTGTGAATTCACATAGAAAACATTAAATTATAATGTTTGACTATTATATATGTGTA  
TGCATTTTACTGGCTCAAAACTACCTACTTCTTCTCAGGCATCAAAAGCATTTTGAGCAGGAGAGTATT  
ACTAGAGCTTTGCCACCTCTCCATTTTGCCTTGGTGTCTCATCTTAATGGCCTAATGCACCCCCAAACAT  
GGAAATATCACCAAAAAATACTTAATAGTCCACCAAAAGGCAAGACTGCCCTTAGAAATTCTAGCCTGGT  
TTGGAGATACTAACTGCTCTCAGAGAAAGTAGCTTTGTGACATGTCATGAACCCATGTTTGCAATCAAAG  
ATGATAAAATAGATTCTTATTTTTCCCCACCCCCGAAAATGTTCAATAATGTCCCATGTAAACCTGCT  
ACAAATGGCAGCTTATACATAGCAATGGTAAAATCATCATCTGGATTTAGGAATTGCTCTTGTCATACCC  
CCAAGTTTCTAAGATTTAAGATTCTCCTTACTACTATCCTACGTTTAAATATCTTTGAAAGTTTGTATTA  
AATGTGAATTTAAGAAATAATATTTATATTTCTGTAAATGTAACTGTGAAGATAGTTATAAACTGAAG  
CAGATACCTGGAACCACTAAAGAACTTCATTTATGGAGGATTTTTTTGCCCTTGTGTTTGAATTAT  
AAAATATAGGTAAAAGTACGTAATTAATAATGTTTTTGGTATTTCTGGTTTTCTTTTTTGGTAGGGG  
CTTGCTTTTTGGTTTTGTCTTCTTTCTCTAACTGATGCTAAATATAACTGTCTTTAATGCTTCTTGG

ATCCCTTAGAAGGTACTTCCTTTTTAACCTTAACCCCTTTAGTAGTTAAATAATTATTTCCATAGGTTGC  
TATTGCCAAGAAGACCTCTTCCAAACAGCACATGATTATTCGTCAAACAGTTTCGTATTCCAGATACTGG  
AATGTGGATAAGAAAGTATACATTTCAAGGGGTAGGTTTTATTATTAAGAAAGCCAAATGAGGATTTTGA  
AATATTCTTTCCTGCATATTATCCATTCTAGCTACATGCTGGCCAGTGGGCCACCTTCTTTTCTGCAAT  
TTAATGCTAGTAATATATTCTATTTAACCCATGAGTCCCAAAGTATTAGCATTTCAACATGTAAGCATGT  
CGGTAAGATAGTTGTGCTTTGCTTAGGGTCCCTCCTGTGTTATGGTCTGGAAAGTGCTTTAGGCAGAA  
AGTCTGAGTGATCACAGGGTTCATCATTATTTCTTTTTCTGAGCCATCATAGTCTGTGCTGTCTGCT  
CTCCAGTTTTCTATTTCTAGACAGAAGTAGGGCAAGTTAGGTACTAGTTATTCTTCATGGCCAGAAGTGC  
AAGTTCTACTTTGCAAGACAAGATTAAGTTAGAGAACACCCTATTCCACTTTGGTGAACCTCAGAGCAAGA  
ACTTTGAGTTCCTTTGGGAGGAAGACAGTGGAGAAGTCTTTGTACTTGGTGATGTGGTTTTTTTCTCAT  
GGCTTCACCTAGTGGCCCCAAGCATGACTTCTCCCATGTCAATGAGCACAGCCACATTCCCGAGTTGAGG  
TGACCCACGGTCCAGAATCATCCTCATTCTGGTGAACCTGGTTCTCTTTGTGGTGGGCATACTGGGTAG  
GAGAATCACCCAAAGGTCACCCATGAGCTGCAGAAAAAAAGGCTATTTGCAGAAGGAGCTCACAGATCAC  
ATTGAAAGCATTGCATATTCAAACATCTTGGTCTTCTTTATTGGCATGCCACAGGGTCTTCTGACCTCT  
GATTAGATCAGACACTTTTTAGATATTGAATCATCAGTTTCTGTACAACTATCTGAATAAGGTATATAAT  
CAATGAAATTTAGAATTTTTTTCTATGCTTACTCCTGATTGGTAATTTGTTTGGGTTTAGAATTCTATAC  
AAGGCCATTTGTAATTTTCTCAGCACTTTAAAAATATTAAACCATGTTTTCTTAA

>NM\_000801.5 Homo sapiens FKBP prolyl isomerase 1A (FKBP1A), transcript variant 1, mRNA  
GCTGTTGGTCCACGCCGCCGTGCGCGCCGCCGCTCAGCGTCCGCCGCCGATGGGAGTGCAGGT  
GGAAACCATCTCCCCAGGAGACGGGCGCACCTTCCCAAGCGCGGCCAGACCTGCGTGGTGCACTACACC  
GGGATGCTTGAAGATGGAAAGAAATTTGATTCTCCCGGGACAGAAACAAGCCCTTTAAGTTTATGCTAG

GCAAGCAGGAGGTGATCCGAGGCTGGGAAGAAGGGGTTGCCAGATGAGTGTGGGTCAGAGAGCCAACT  
GACTATATCTCCAGATTATGCCTATGGTGCCACTGGGCACCCAGGCATCATCCCACCACATGCCACTCTC  
GTCTTCGATGTGGAGCTTCTAAAACTGGAATGACAGGAATGGCCTCCTCCCTTAGCTCCCTGTTCTTGGA  
TCTGCCATGGAGGGATCTGGTGCCTCCAGACATGTGCACATGAATCCATATGGAGCTTTTCCTGATGTTT  
CACTCCACTTTGTATAGACATCTGCCCTGACTGAATGTGTTCTGTCACTCAGCTTTGCTTCCGACACCTC  
TGTTTCCTCTTCCCCTTTCTCCTCGTATGTGTGTTTACCTAACTATATGCCATAAACCTCAAGTTATTC  
ATTTTATTTTGTTCATTTTGGGGTGAAGATTCAGTTTCAGTCTTTTGGATATAGGTTTCCAATTAAGT  
ACATGGTCAAGTATTAACAGCACAAGTGGTAGGTTAACATTAGAATAGGAATTGGTGTGGGGGGGGGGT  
TTGCAAGAATATTTTATTTTAATTTTTTGGATGAAATTTTATCTATTATATTAACATTCTTGCTGC  
TGCGCTGCAAAGCCATAGCAGATTTGAGGCGCTGTTGAGGACTGAATTACTCTCCAAGTTGAGAGATGTC  
TTTGGGTAAATTAAGCCCTACCTAAACTGAGGTGGGGATGGGGAGAGCCTTGCCTCCACCATTCC  
CACCCACCCTCCCCTTAAACCCTCTGCCTTTGAAAGTAGATCATGTTCACTGCAATGCTGGACACTACAG  
GTATCTGTCCCTGGGCCAGCAGGGACCTCTGAAGCCTTCTTTGTGGCCTTTTTTTTTTTTCATCCTGTGG  
TTTTTCTAATGGACTTTCAGGAATTTTGAATCTCATAACTTTCCAAGCTCCACCACTTCCTAAATCTTA  
AGAACTTTAATTGACAGTTTCAATTGAAGGTGCTGTTTGTAGACTTAACACCCAGTGAAAGCCCAGCCAT  
CATGACAAATCCTTGAATGTTCTCTTAAGAAAATGATGCTGGTCATCGCAGCTTCAGCATCTCCTGTTTT  
TTGATGCTTGGCTCCCTCTGCTGATCTCAGTTTCCTGGCTTTTCTCCCTCAGCCCCTTCTCACCCCTTT  
GCTGTCCTGTGTAGTGATTGGTGAGAAATCGTTGCTGCACCCTTCCCCAGCACCATTTATGAGTCTCA  
AGTTTTATTATTGCAATAAAAGTGCTTTATGCCGGCTTTTCTCA

>NM\_004116.5 Homo sapiens FKBP prolyl isomerase 1B (FKBP1B), transcript variant 1, mRNA

GCAGTGGCGGCGAGGAGGCGAGCCGGAGCGACGGCGGGGCTGGGGCCGGAGCCGAGCCGGGGTCTGGGCAG

CAGCAGGGACCCCCAGAGGCGGGGCCTGTGGGACCGCTATGGGCGTGGAGATCGAGACCATCTCCCCG  
GAGACGGAAGGACATTCCCCAAGAAGGGCCAAACGTGTGTGGTGCACTACACAGGAATGCTCCAAAATGG  
GAAGAAGTTTGATTCATCCAGAGACAGAAACAAACCTTTCAAGTTCAGAATTGGCAAACAGGAAGTCATC  
AAAGGTTTTGAAGAGGGTGCAGCCCAGATGAGCTTGGGGCAGAGGGCGAAGCTGACCTGCACCCCTGATG  
TGGCATATGGAGCCACGGGCCACCCCGGTGTCATCCCTCCAATGCCACCCTCATCTTTGACGTGGAGCT  
GCTCAACTTAGAGTGAAGGCAGGAAGGAACTCAAGGTGGCTGGAGATGGCTGCTGCTCACCCCTCTAGCC  
TGCTCTGCCACTGGGACGGCTCCTGCTTTGGGGCTCTTGATCAGTGTGCTAACCTCACTGCCTCATGGC  
ATCATCCATTCTCTCTGCCAAGTTGCTCTGTATGTGTTTCGTCAGTGTTTCATGCGAATTCTTGCTTGAGG  
AAACTTCGGTTGCAGATTGAAGCATTTAGGTTGTGCATTTTGTGTGATGCATGTAGTAGCCTTTCTGA  
TGACAGAACACAGATCTCTTGTCGACAATCTACACTGCCTTACCTTCACTTAAACCACACACACAAGG  
TGCTCAGACATGAAATGTACATGGCGTACCGTACACAGAGGGACTTGAGCCAGTTACCTTTGCTGTCACT  
TTCTCTTTATAAATTCTGTTAGCTGCTCACTTAAACAATGTCTCTTTGAGAAAATGTAAAATAAAGGC  
TCTGTGCTTGACAAA

>NM\_005252.4 Homo sapiens Fos proto-oncogene, AP-1 transcription factor subunit (FOS), mRNA  
AACCGCATCTGCAGCGAGCATCTGAGAAGCCAAGACTGAGCCGGCGGCCGCGGCGCAGCGAACGAGCAGT  
GACCGTGCTCCTACCCAGCTCTGCTCCACAGCGCCACCTGTCTCCGCCCTCGGCCCTCGCCCGGCTT  
TGCCTAACCGCCACGATGATGTTCTCGGGCTTCAACGCAGACTACGAGGCGTCATCCTCCCGCTGCAGCA  
GCGCGTCCCCGGCCGGGGATAGCCTCTCTTACTACCACTACCCGCAGACTCCTTCTCCAGCATGGGCTC  
GCCTGTCAACGCGCAGGACTTCTGCACGGACCTGGCCGTCTCCAGTGCCAACTTCATTCCCACGGTCACT  
GCCATCTCGACCAGTCCGGACCTGCAGTGGCTGGTGCAGCCCGCCCTCGTCTCCTCCGTGGCCCCATCGC  
AGACCAGAGCCCCTCACCTTTCGGAGTCCCCGCCCCCTCCGCTGGGGCTTACTCCAGGGCTGGCGTTGT

GAAGACCATGACAGGAGGCCGAGCGCAGAGCATTGGCAGGAGGGGCAAGGTGGAACAGTTATCTCCAGAA  
GAAGAAGAGAAAAGGAGAATCCGAAGGGAAAGGAATAAGATGGCTGCAGCCAAATGCCGCAACCGGAGGA  
GGGAGCTGACTGATACACTCCAAGCGGAGACAGACCAACTAGAAGATGAGAAGTCTGCTTTGCAGACCGA  
GATTGCCAACCTGCTGAAGGAGAAGGAAAACTAGAGTTCATCCTGGCAGCTCACCGACCTGCCTGCAAG  
ATCCCTGATGACCTGGGCTTCCCAGAAGAGATGTCTGTGGCTTCCCTTGATCTGACTGGGGGCCTGCCAG  
AGGTTGCCACCCCGGAGTCTGAGGAGGCCTTACCCTGCCTCTCCTCAATGACCCTGAGCCCAAGCCCTC  
AGTGGAACCTGTCAAGAGCATCAGCAGCATGGAGCTGAAGACCGAGCCCTTTGATGACTTCCTGTTCCCA  
GCATCATCCAGGCCAGTGGCTCTGAGACAGCCCGCTCCGTGCCAGACATGGACCTATCTGGGTCTTCT  
ATGCAGCAGACTGGGAGCCTCTGCACAGTGGCTCCCTGGGGATGGGGCCCATGGCCACAGAGCTGGAGCC  
CCTGTGCACTCCGGTGGTCACCTGTACTCCCAGCTGCACTGCTTACACGTCTTCCTTCGTCTTCACCTAC  
CCCGAGGCTGACTCCTTCCCCAGCTGTGCAGCTGCCACCGCAAGGGCAGCAGCAGCAATGAGCCTTCCT  
CTGACTCGCTCAGCTACCCACGCTGCTGGCCCTGTGAGGGGGCAGGGAAGGGGAGGCAGCCGGCACCCA  
CAAGTGCCACTGCCCCGAGCTGGTGCATTACAGAGAGGAGAAACACATCTTCCCTAGAGGGTTCCTGTAGA  
CCTAGGGAGGACCTTATCTGTGCGTGAAACACACCAGGCTGTGGGCCTCAAGGACTTGAAAGCATCCATG  
TGTGGACTCAAGTCCTTACCTCTTCCGGAGATGTAGCAAAACGCATGGAGTGTGTATTGTTCCCACTGAC  
ACTTCAGAGAGCTGGTAGTTAGTAGCATGTTGAGCCAGGCCTGGGTCTGTGTCTCTTTTCTCTTTCTCCT  
TAGTCTTCTCATAGCATTAACTAATCTATTGGGTTCATTATTGGAATTAACCTGGTGCTGGATATTTTCA  
AATTGTATCTAGTGCAGCTGATTTTAACAATAACTACTGTGTTCTGGCAATAGTGTGTTCTGATTAGAA  
ATGACCAATATTATACTAAGAAAAGATACGACTTTATTTTCTGGTAGATAGAAATAAATAGCTATATCCA  
TGTA CTGTAGTTTTTCTTCAACATCAATGTTCAATTGTAATGTTACTGATCATGCATTGTTGAGGTGGTCT  
GAATGTTCTGACATTAACAGTTTTCCATGAAAACGTTTTATTGTGTTTTTAATTTATTTATTAAGATGGA  
TTCTCAGATATTTATATTTTATTTTATTTTCTACCTTGAGGTCTTTTGACATGTGGAAAGTGAATT  
TGAATGAAAAATTTAAGCATTGTTTGCTTATTGTTCCAAGACATTGTCAATAAAAGCATTTAAGTTGAAT  
GCGA

>NM\_002015.4 Homo sapiens forkhead box O1 (FOXO1), mRNA

GATCCCGTAAGTCGGGCGGCCTGGTAGTCGCAGCAGCCGCTGCCGCAGCCGCCACATTCAACAGGCAGCA  
GCGCAGCGGGCGCGCCGCTGGGGAGAGCAAGCGGCCCCGCGGCGTCCGTCCGTCCTCCGTCCGCGGCCCT  
GTCAGCTGGAGCGCGGCGCAGGCTCTGCCCCGGCCCGCGGCTCTGGCCGGCCGTCCAGTCCGTGCGGCG  
GACCCCGAGGAGCCTCGATGTGGATGGCCCCGCGAAGTTAAGTTCTGGGCTCGCGCTTCCACTCCGCCCGC  
GCCTTCCTCCCAGTTTCCGTCCGCTCGCCGCACCGGCTTCGTTCCCCCAAATCTCGGACCGTCCCTTCGC  
GCCCCCTCCCCGTCCGCCCCCAGTGCTGCGTTCTCCCCCTCTTGGCTCTCCTGCGGCTGGGGGAGGGGCG  
GGGGTCACCATGGCCGAGGCGCCTCAGGTGGTGGAGATCGACCCGGACTTCGAGCCGCTGCCCCGGCCGC  
GCTCGTGACCTGGCCGCTGCCCAGGCCGGAGTTTAGCCAGTCCAACTCGGCCACCTCCAGCCCGGCGCC  
GTCGGGCAGCGCGGCTGCCAACCCCGACGCCGCGGCGGGCCTGCCCTCGGCCTCGGCTGCCGCTGTCAGC  
GCCGACTTCATGAGCAACCTGAGCTTGCTGGAGGAGAGCGAGGACTTCCCGCAGGCGCCCGGCTCCGTGG  
CGGCGGCGGTGGCGGCGGCGGCCGCCGCGGCCGCCACCGGGGGGCTGTGCGGGGACTTCCAGGGCCCCGA  
GGCGGGCTGCCTGCACCCAGCGCCACCGCAGCCCCCGCCGGCCGGCGCTGTCGCAGCACCCGCCGGTG  
CCCCCGCCGCCGCTGGGCCGCTCGCGGGGCAGCCGCGCAAGAGCAGCTCGTCCCGCCGCAACGCGTGGG  
GCAACCTGTCCTACGCCGACCTCATCACCAAGGCCATCGAGAGCTCGGCGGAGAAGCGGCTCACGCTGTC  
GCAGATCTACGAGTGGATGGTCAAGAGCGTGCCCTACTTCAAGGATAAGGGTGACAGCAACAGCTCGGCG  
GGCTGGAAGAATTCAATTCGTCATAATCTGTCCCTACACAGCAAGTTCATTCGTGTGCAGAATGAAGGAA  
CTGGAAAAAGTTCTTGGTGGATGCTCAATCCAGAGGGTGGCAAGAGCGGGAAATCTCCTAGGAGAAGAGC  
TGCATCCATGGACAACAACAGTAAATTTGCTAAGAGCCGAAGCCGAGCTGCCAAGAAGAAAGCATCTCTC  
CAGTCTGGCCAGGAGGGTGCTGGGGACAGCCCTGGATCACAGTTTTCCAAATGGCCTGCAAGCCCTGGCT  
CTCACAGCAATGATGACTTTGATAACTGGAGTACATTTGCCCTCGAACTAGCTCAAATGCTAGTACTAT  
TAGTGGGAGACTCTACCCATTATGACCGAACAGGATGATCTTGGAGAAGGGGATGTGCATTCTATGGTG  
TACCCGCCATCTGCCGCAAAGATGGCCTCTACTTTACCCAGTCTGTCTGAGATAAGCAATCCCGAAAAACA

TGGAAAATCTTTTGGATAATCTCAACCTTCTCTCATCACCAACATCATTAAGTGTTCGACCCAGTCTC  
ACCTGGCACCATGATGCAGCAGACGCCGTGCTACTCGTTTGCGCCACCAAACACCAGTTTGAATTCACCC  
AGCCCAAACCTACCAAAAATATACATATGGCCAATCCAGCATGAGCCCTTGCCCCAGATGCCTATACAAA  
CACTTCAGGACAATAAGTCGAGTTATGGAGGTATGAGTCAGTATAACTGTGCGCCTGGACTCTTGAAGGA  
GTTGCTGACTTCTGACTCTCCTCCCCATAATGACATTATGACACCAGTTGATCCTGGGGTAGCCCAGCCC  
AACAGCCGGGTCTGGGCCAGAACGTCATGATGGGCCCTAATTCGGTCATGTCAACCTATGGCAGCCAGG  
CATCTCATAACAAAATGATGAATCCCAGCTCCCATACCCACCCTGGACATGCTCAGCAGACATCTGCAGT  
TAACGGGCGTCCCCTGCCCCACACGGTAAGCACCATGCCCCACACCTCGGGTATGAACCGCTGACCCAA  
GTGAAGACACCTGTACAAGTGCCTCTGCCCCACCCCATGCAGATGAGTGCCCTGGGGGGCTACTCCTCCG  
TGAGCAGCTGCAATGGCTATGGCAGAATGGGCCTTCTCCACCAGGAGAAGCTCCCAAGTGACTTGGATGG  
CATGTTCAATTGAGCGCTTAGACTGTGACATGGAATCCATCATTCGGAATGACCTCATGGATGGAGATACA  
TTGGATTTAACTTTGACAATGTGTTGCCCAACCAAAGCTTCCCACACAGTGTCAAGACAACGACACATA  
GCTGGGTGTCAGGCTGAGGGTTAGTGAGCAGGTTACACTTAAAAGTACTTCAGATTGTCTGACAGCAGGA  
ACTGAGAGAAGCAGTCCAAAGATGTCTTTCACCAACTCCCTTTTAGTTTTCTTGGTTAAAAAAAAAAAAACA  
AAAAAAAAAACCTCCTTTTTTCTTTTCGTCAGACTTGGCAGCAAAGACATTTTTCTGTACAGGATGTT  
TGCCCAATGTGTGCAGGTTATGTGCTGCTGTAGATAAGGACTGTGCCATTGGAAATTTTCATTACAATGAA  
GTGCCAAACTCACTACACCATATAATTGCAGAAAAGATTTTCAGATCCTGGTGTGCTTTCAAGTTTTGTA  
TATAAGCAGTAGATACAGATTGTATTTGTGTGTGTTTTTGGTTTTTCTAAATATCCAATTGGTCCAAGGA  
AAGTTTATACTCTTTTTGTAATACTGTGATGGGCCTCATGTCTTGATAAGTTAACTTTTGTGTACTA  
CCTGTTTTCTGCGGAACTGACGGATCACAAAGAACTGAATCTCCATTCTGCATCTCCATTGAACAGCCTT  
GGACCTGTTACGTTGCCACAGAATTCACATGAGAACCAAGTAGCCTGTTATCAATCTGCTAAATTAATG  
GACTTGTTAACTTTTGAAAAAAAAAAGATTAAATGCCAGCTTTGTACAGGTCTTTCTATTTTTTTTTG  
TTTATTTTGTTATTTGCAAATTTGTACAAACATTTAAATGGTTCTAATTTCCAGATAAATGATTTTTGAT  
GTTATTGTTGGGACTTAAGAACATTTTTGGAATAGATATTGAACTGTAATAATGTTTTCTTAAACTAGA  
GTCTACTTTGTTACATAGTCAGCTTGTAATTTTGTGGAACCACAGGTATTTGGGGCAGCATTCATAATT

TTCATTTTGTATTCTAACTGGATTAGTACTAATTTTATACATGCTTAACTGGTTTGTACACTTTGGGATG  
CTACTTAGTGATGTTTCTGACTAATCTTAAATCATTGTAATTAGTACTTGCATATTCAACGTTTCAGGCC  
CTGGTTGGGCAGGAAAGTGATGTATAGTTATGGACACTTTGCGTTTCTTATTTAGGATAACTTAATATGT  
TTTTATGTATGTATTTTAAAGAAATTCATCTGCTTCTACTGAACTATGCGTACTGCATAGCATCAAGTC  
TTCTCTAGAGACCTCTGTAGTCCTGGGAGGCCTCATAATGTTTGTAGATCAGAAAAGGGAGATCTGCATC  
TAAAGCAATGGTCCTTTGTCAAACGAGGGATTTTGATCCACTTCACCATTTTGAGTTGAGCTTTAGCAAA  
AGTTTCCCCTCATAATTCTTTGCTCTTGTTTCAGTCCAGGTGGAGGTTGGTTTTGTAGTTCTGCCTTGAG  
GAATTATGTCAACACTCATACTTCATCTCATTCTCCCTTCTGCCCTGCAGATTAGATTACTTAGCACACT  
GTGGAAGTTTAAAGTGAAGGAGGGAATTTAAAAATGGGACTTGAGTGGTTTGTAGAATTTGTGTTCATAA  
GTTCAGATGGGTAGCAAATGGAATAGAACTTACTTAAAAATTGGGGAGATTATTTGAAAACCAGCTGTA  
AGTTGTGCATTGAGATTATGTTAAAAGCCTTGGCTTAAGAATTTGAAAATTTCTTTAGCCTGTAGCAACC  
TAAACTGTAATCCTATCATTATGTTTTATTACTTTCCAATTACCTGTAAGTACAGACCAAATTAATTG  
GCTTTGTGCCTATTTAGTCCATCAGTATTTTCAAGTCATGTGGAAAGCCCAAAGTCATCACAATGAAGA  
GAACAGGTGCACAGCACTGTTCTCTTGTTCTTGAGAAGGATCTAATTTTTCTGTATATAGCCCACAT  
CACACTTGCTTTGTCTTGATGTTAATTGCATCTTCATTGGCTTGGTATTTCTAAATGTTTAAACAAGAA  
CACAAGTGTTCTGATAAGATTTCTACAGTAAGCCAGCTCTATTGTAAGCTTCCCACTGTGATGATCAT  
TTTTTTGAAGATTCATTGAACAGCCACCACTCTATCATCCTCATTTTGGGGCAGTCCAAGACATAGCTGG  
TTTTAGAAACCCAAGTTCCTCTAAGCACAGCCTCCCGGGTATGTAAGTGAAGTGGTGCCAAAGTACTTG  
TGTAATAATTTCTATTACTACGTACTGTCACTTTCTCCCGTGCCATTACTGCATCATAATACAAGGAAC  
CTCAGAGCCCCCATTTGTTCAATTAAGAGGCAACTACAGCCAAAATCACTGTAAAAATCTTACTACTTCA  
TGGAGTAGCTCTTAGGAAAATATATCTTCCTCCTGAGTCTGGGTAATTATACCTCTCCCAAGCCCCCAT  
GTGTGTTGAAATCCTGTCATGAATCCTTGGTAGCTCTCTGAGAACAGTGAAGTCCAGGGAAAGGCATCTG  
GTCTGTCTGGAAAGCAAACATTATGTGGCCTCTGGTAGTTTTTTTTCTGTAGAATACTGACTTTCTGGA  
GTAATGAGTATATATCAGTTATTGTACATGATTGCTTTGTGAAATGTGCAAATGATATCACCTATGCAGC  
CTTGTTTGATTTATTTCTCTGGTTTGTACTGTTATTAAGCATATTGTATTATAGAGCTATTCAGATA

TTTAAATATAAAGATGTATTGTTTCCGTAATATAGACGTATGGAATATATTTAGGTAATAGATGTATTA  
CTTGAAAAGTTCTGCTTTGACAAACTGACAAAGTCTAAATGAGCACATGTATCCCAGTGAGCAGTAAATC  
AATGGAACATCCCAAGAAGAGGATAAGGATGCTTAAAATGGAAATCATTCTCCAACGATATACAAATTGG  
ACTTGTTCAACTGCTGGATATATGCTACCAATAACCCCAGCCCCAACTTAAAATTCTTACATTCAAGCTC  
CTAAGAGTTCTTAATTTATAACTAATTTTAAAAGAGAAGTTTCTTTTCTGGTTTTAGTTTGGGAATAATC  
ATTCATTAAAAAAAATGTATTGTGGTTTATGCGAACAGACCAACCTGGCATTACAGTTGGCCTCTCCTTG  
AGGTGGGCACAGCCTGGCAGTGTGGCCAGGGGTGGCCATGTAAGTCCCATCAGGACGTAGTCATGCCTCC  
TGCAATTCGCTACCCGAGTTTAGTAACAGTGCAGATTCCACGTTCTTGTTCCGATACTCTGAGAAGTGCC  
TGATGTTGATGTACTTACAGACACAAGAACAATCTTTGCTATAATTGTATAAAGCCATAAATGTACATAA  
ATTATGTTTAAATGGCTTGGTGTCTTTCTTTTCTAATTATGCAGAATAAGCTCTTTATTAGGAATTTTTT  
GTGAAGCTATTAAATACTTGAGTTAAGTCTTGTTCAGCCA

>NM\_001455.4 Homo sapiens forkhead box O3 (FOXO3), transcript variant 1, mRNA

GGTGTCTGCTGCGCCAGGTTGCTGGCCGCACGTCTTCAGGTCTCCTGTTCTGGGAGGCGGGCGCGGC  
AGGACTGGGAGGTGGCGGCAGCGGGCGAGGACTCGCCGAGGACGGGGCTCCGGCCCGGGATAACCAACTC  
TCCTTCTCTCTTTTGGTGCTTCCCCAGGCGGCGGGCGGGCGGGCGGGAGCCGGAGCCTTCGCGGCGT  
CCACGTCCCTCCCCGCTGCACCCCGCCCCGGCGCGAGAGGAGAGCGCGAGAGCCCCAGCCGCGGGCGGG  
CGGGCGGCGAAGATGGCAGAGGCACCGGCTTCCCCGGCCCCGCTCTCTCCGCTCGAAGTGGAGCTGGACC  
CGGAGTTCGAGCCCCAGAGCCGTCCGCGATCCTGTACGTGGCCCCTGCAAAGGCCGGAGCTCCAAGCGAG  
CCCTGCCAAGCCCTCGGGGGAGACGGCCGCCGACTCCATGATCCCCGAGGAGGAGGACGATGAAGACGAC  
GAGGACGGCGGGGGACGGGCCGGCTCGGCCATGGCGATCGGCGGCGGGCGGGAGCGGCACGCTGGGCT  
CCGGGCTGCTCCTTGAGGACTCGGCCCGGGTGCTGGCACCCGGAGGGCAAGACCCCGGGTCTGGGCCAGC

CACCGCGGCGGGCGGGCTGAGCGGGGTACACAGGCGCTGCTGCAGCCTCAGCAACCGCTGCCACCGCCG  
CAGCCGGGGGCGGCTGGGGGCTCCGGGCAGCCGAGGAAATGTTCTGTCGCGGCGGAACGCCTGGGGAAACC  
TGTCCTACGCGGACCTGATCACCCGCGCCATCGAGAGCTCCCCGGACAAACGGCTCACTCTGTCCCAGAT  
CTACGAGTGGATGGTGC GTTGC GTGCCCTACTTCAAGGATAAGGGCGACAGCAACAGCTCTGCCGGCTGG  
AAGAACTCCATCCGGCACAACCTGTCACTGCATAGTCGATTCATGCGGGTCCAGAATGAGGGAACTGGCA  
AGAGCTCTTGGTGGATCATCAACCCTGATGGGGGGAAGAGCGGAAAAGCCCCCGGCGGGGGCTGTCTC  
CATGGACAATAGCAACAAGTATACCAAGAGCCGTGGCCGCGCAGCCAAGAAGAAGGCAGCCCTGCAGACA  
GCCCCGAATCAGCTGACGACAGTCCCTCCCAGCTCTCCAAGTGGCCTGGCAGCCCCACGTCACGCAGCA  
GTGATGAGCTGGATGCGTGACGGACTTCGTTACGCACCAATTCTAACGCCAGCACAGTCAGTGGCCG  
CCTGTCGCCCATCATGGCAAGCACAGAGTTGGATGAAGTCCAGGACGATGATGCGCCTCTCTCGCCCATG  
CTCTACAGCAGCTCAGCCAGCCTGTCACCTTCAGTAAGCAAGCCGTGCACGGTGGAAGTGCACGGCTGA  
CTGATATGGCAGGCACCATGAATCTGAATGATGGGCTGACTGAAAACCTCATGGACGACCTGCTGGATAA  
CATCACGCTCCCGCCATCCCAGCCATCGCCCACTGGGGGACTCATGCAGCGGAGCTCTAGCTTCCCGTAT  
ACCACCAAGGGCTCGGGCCTGGGCTCCCCAACAGCTCCTTTAACAGCACGGTGTTGCGACCTTCATCTC  
TGAAGTCCCTACGCCAGTCTCCCATGCAGACCATCCAAGAGAACAAGCCAGCTACCTTCTCTTCATGTC  
ACACTATGGTAACCAGACACTCCAGGACCTGCTCACTTCGGACTCACTTAGCCACAGCGATGTCATGATG  
ACACAGTCGGACCCCTTGATGTCTCAGGCCAGCACCGCTGTGTCTGCCAGAATTCCCGCCGGAACGTGA  
TGCTTCGCAATGATCCGATGATGTCCTTTGCTGCCCAGCCTAACCAAGGGAAGTTTGGTCAATCAGAACTT  
GCTCCACCACCAGCACCAAACCCAGGGCGCTCTTGGTGGCAGCCGTGCCTTGTCGAATTCTGTCAGCAAC  
ATGGGCTTGAGTGAGTCCAGCAGCCTTGGGTCAGCCAAACACCAGCAGCAGTCTCCTGTCAGCCAGTCTA  
TGCAAACCTCTCGGACTCTCTCTCAGGCTCCTCCTTGTACTCAACTAGTGCAAACCTGCCCCGTCATGGG  
CCATGAGAAGTTCCCAGCGACTTGGACCTGGACATGTTCAATGGGAGCTTGGAATGTGACATGGAGTCC  
ATTATCCGTAGTGAAGTCAATGGATGCTGATGGGTTGGATTTTAACTTTGATTCCCTCATCTCCACACAGA  
ATGTTGTTGGTTTGAACGTGGGGAACTTCACTGGTGCTAAGCAGGCCTCATCTCAGAGCTGGGTGCCAGG  
CTGAAGGATCACTGAGGAAGGGGAAGTGGGCAAAGCAGACCCTCAAAGTACACAAGACCTACAGAGAAA

ACCCTTTGCCAAATCTGCTCTCAGCAAGTGGACAGTGATACCGTTTACAGCTTAACACCTTTGTGAATCC  
CACGCCATTTTCCTAACCCAGCAGAGACTGTTAATGGCCCCTTACCCTGGGTGAAGCACTTACCCTTGGA  
ACAGAACTCTAAAAAGTATGCAAAATCTTCCTTGACAGGGTGGTGAGCCGCCTGCCAGTGGAGGACAGC  
ACCCCTCAGCACCACCCACCCTCATTAGAGCACACCGTGAGCCCCGTCGGCCATTCTGTGGTGTTTTA  
ATATTGCGATGGTTTATGGGACGTTTTAAGTGTTGTTCTTGTTGTTTTCTTTGACTTTCTGAGTTT  
TTCACATGCATTAACCTTGCGGTATTTTTCTGTAAAATGTAAACCGTCCTTCCCCTAGCAAATTTAAAAA  
CAGAAAGAAAATGTTGTACCAGTTACCATTCGGGTTTCGAGCATCACAAGCTTTTGAGCGCATGGAACCTC  
CATAAACTAACAAATTACATAAACTAAAGGGGGATTTTTCTTCTTTTGTGGTAGAAAATTATCCT  
TTTCTAAAACTGAACAATGGCACAATTGTTTGCTATGTGCACCCGTCCAGGACAGAACCGTGATAGGC  
AAAAGGAGTGGAGCACAGCGTCCGGCCAGTGTGTTCCGGTTCTGAGTCAGGGTGATCTGTGGACGGGA  
CCCCAGCACCAAGTCTACGGGTGCCAGATCAGTAGGGCCTGTGATTTCTGTGAGTGTCTCAGCTAATG  
TGAACAGTGTTGGTCTGCTGGTTAGAACTAGAATATTGATATTTTCAGGAAAGAAATCAGCTCAGCTCT  
CCACTCATTGCCAAATGTCACTAAAGGGTTAGTTTTAAGGAGAAAGAAAAGGAAAAAAAAAAAAACAA  
AAAAGTCCTGTTTTGCTTGCAGAACAAATGAACTTACAGGTGAGCATTAGCTTGCACTGAGAAATGTG  
CGAAGAGTAAAAACCAAGTCAATGCTGAGGCAGTTCTAACTTCACTGTTTTCTAAATACACATCCTTG  
ATTATTTTCAGCCTTGCTATATAATCTGATCTGCTAGAAGTGTATGAGTGAGAGGCAATAGCATACAAAC  
TGATTTTTTAAATATAAGCTTAGGTTGTAATTGTACAAGTCACTCAATGGAAGTACAAAATAGGGCAGTT  
TTAACTTTTTTTCTGCTTCTATGGATTTCATTTTGTTGTGTTTTCAAAAAGTTATGGTGCTGTATAGGT  
GCTTTCTGTTTAACTGGAAAGTGTGATTATATTCGTTACCTTCTTGGTAGACGGAATAGTTGGGACCA  
CCTTGGTACATAAGAAATTGGTATAACGATGCTCTGATTAGCACAGTATATGCATACTTCTCAAAGTG  
ATATATGAAGACTCTTTCTTGCATAAAAAGCATTAGGCATATAAATGTATAAATATATTTATCATGT  
ACAGTACAAAAATGGAACCTTATGCATGGGCCTTAGGAATACAGGCTAGTATTTAGCACAGACTTCCTT  
GCTTGAGTTCTTGCTGATGCTTGACCGTGACAGTGGGCACCAACACAGACGTGCCACCCAACCCCTGC  
ACACACCACCGGCCACCAGGGGCCCCCTTGTCGCCTTGGCTTTATAACTCCTCTGGGGGTGATATTGGT  
GGTGATCACAGCTCTAGCATAATGAGAGTTCATTTGGTATTGTCACACGTCTCCTGCCTCGCTGGGT

TGCCATGTTTGAGCGATGGCCCTGTTGATTTACCCTGCCTTTTACTGAATCTGTAAATTGTTGTGCAAT  
TGTGGTTATAGTAGACTGTAGCACATTGCCTTTTCTAACTGCTACATGTTTATAATCTTCATTTTTAAA  
GTATGTGTAATTTTTTTAAGTATGTATTCTATTCATATGGTCTGCTTGTCAGTGAGCCAGACTTGCTTAC  
TATATTCCTTTATAATAATGCTAGCCACTTCCTGGATTCTTTAGTAATGTGCTGTATGCAAGAACTTTCC  
AGTAGCAGTGAAGGAGGGTTGCCTCTCCAAGCTTCCTAAGGGATGCTGCCCTGTGTGGGGATGCATTGCA  
GAGGCACTAGTAGCATGGGGGCTAGAGTGGGGAGCGAGATGTAAAAGGGTGGGGGGATAGGAGAATTCCA  
GAGTGCTTCAGCATTAGGGTCCTGAGAACTTCTGAGTTCAGAGAAACATGCAAAGTGAATAACAAAATA  
GCTACTTACCTTTGCAGTTTTACAGACCCTGGGAGCTGCTTTGGGAGTGAGAAAGGCAACCCTCCAATGT  
GTTTCAACTTTAAATGTTGAATTCCTTTAGACATGGTATCTCATTTATTCTCCTTTTCTAGCGTTTGT  
TGAATTCAGGCAGAATGTCTTACAGAATGTCCTAGAACCAGATTATCATTTAATCTGAAACAGCTGAGG  
AAGGGACAGAGAAGGTACAAGGGCAAGGCAGCACAAAACAGATCAGGAGAATGAAGAGGGAATGCTTTGG  
TTTTTGTGTTTGTGTTTGTGTTTTCTTTTTCAAGTAACTAAAACAGCATCTACATGTAGAGTGTTGTGGAG  
AGCTGAGACCAGGGTAAAGTCAAGTGCAGCATCAGTACTGCGAGACCCACCAGCCCCTGGAGAGGGTCAG  
CCGAGAATCTGGTAGTGAAGCCTGTCTAGGGTCCCGGCACCCTCACCTCAGCCACCTGCAGAGAGGCCA  
GGGCCCCAGAGACTAGCCTGGTTCTGAAGTGGGCAGGGGTGCTGCCAGAGCCCTCTGCCCCCTATGTTGA  
GACCCTGCTTTCAGGACAGGCCAGCCGTTGGCCACCATGTCACATTCTGAGTGAGTGTCACAGGTCCCTA  
ACAATAATTTTCTGATCTGGAGCATATCAGCAGAATGCTTAGCCTCAAGGGGCCTGGCAGCTGTAATGTT  
TGATTTATGATGAGAACTATCCGAGGCCACCCTTGGCCTCTAAATAAGCTGCTCTAGGGAGCCGCTACT  
TTTTGATGAGAAATTAGAAGAGTACCTAATGTTGAAAACATGACATGCGCTCTTGGGATCTGCTGTTCTC  
TCCAGGGCTCCAGAACCTGATACCTGTTACCAAAGCTAGGAAAGAGCTTTATCACAAGCCTTCACTGTCC  
TGGCATGAGAACTGGCTGCCAGGCTCAGTGTACCCCATTAAGTGTGAATGAATCTGAGCTTGGTTTCCTT  
TATTGCTTCCTCTGCAATATGATTGCTGAAACACATTTTAAAAATTCAGAAGCTTGCTACTCCTGTTAAT  
GGGAGGATCAGTCACACATGTGTAGTACAAGGCGGACTTTGTGTTTGTGTTTGGTGTTAATTTTAGCAT  
TGTGTGTGTTGCTTCCCCACCCTGAGGAGAGGACACCATGGCTTACTACTCAGGACAAGTATGCCCCGCT  
CAGGGTGTGATTCAGGTGGCTTCCAACTTGACGCAGTTTAAAGATGGTGGGGACAGACTTTGCCTCT

ACCTAGTGAACCCCACTTAAAGAATAAGGAGCATTTGAATCTCTTGAAAAGGCCATGAAGAATAAAGCA  
GTCAAAAAGAAGTCCTCCATGTTGGTGCCAAGGACTTGCGAGGGGAAATAAAAATGTTATCCAGCCTGAC  
CAACATGGAGAAACCCCGTCTCCATTAATAAATACAAAATTAGCCTGGCATGGTGGCGCATGCCTGTAATC  
CCAGCTACTCTGGAGGCTGAGGCAGGAGAATCGCTTGAACCCAGGAGGCGGAGGTCGCAGTGAGCCGAGA  
TCATGCCAGTGCACTCCAGCCTGGGTAACAAGAGTGAACTCCGTGTCAAAAAAAAAAAAAAATGTTAC  
TCATCCTCTCTGAAAGCAAAAAGGAAACCCTAACAGCTCTGAACTCTGGTTTTATTTTTCTTGCTGTATT  
TGGGTGAACATTGTATGATTAGGCATAATGTTAAAAAAAAAATTTTTTTTGGTAGAAATGCAATCACC  
AGTAAAGAGGTACGAAAAAGCTAGCCTCTCTCAGAGACCGGGGAGGCAGAGTACTACTAGAGGAAGTGAA  
GTTCTGATGGAATCATGCCTGTCAAATGAGGTCTTGAAGCGGATGCCCAAATAAAAGAGTATATTTTATC  
TAAATCTTAAGTGGGTAACATTTTATGCAGTTTAAATGAATGGAATATTTTCCTCTTGTTTAGTTGTATC  
TGTTTGATTTTTCTTTGATGAATGATTGGTCATGAGGCCTCTTGCCCACTCCAGAAATACGTGTGCGG  
CTGCTTTAAGAACTATGTGTCTGGTCACTTATTTCTCTAAAATTATCTCATTGCCTGGCAATCAGTCTT  
CTCTTGATACTTGTCTAGCACATTATGTACATGGGAAATGTAAACAAATGTGAAGGAGGACCAGAAAA  
ATTAGTTAATATTTAAAAAATGTATTGTGCATTTTGGCTTCACATGTTTAACTTTTTTTAAGAAAAAAG  
TTGCATGAATGGAAAAAAAATCTGTATACAGTATCTGTAAAACTATCTTATCTGTTTCAATTCCTTGC  
TCATATCCCATATAATCTAGAACTAAATATGGTGTGTGGCCATATTTAAACACCTGAGAGTCAAGCAGTT  
GAGACTTTGATTTGAAGCACCTCATCCTTCTTTCAATGCGAACACTATCATATGGCATTCTTACTGAGGA  
TTTTGTCTAACCATATGTTGCCATGAATTAAGTCTGCCGCCTTTCTTAAGGATCAAAACCAGTTTGATT  
GGGAATCTTCCCCTTTCCAAATGAAATAGAGATGCAGTACTTAACTTTCTTGGTGTGTTGTAGATATTGC  
CTTGTGATTCCACTTAAACCGTAATCTAGTTTGTAAGAGAGATGGTGACGCATGTAAATAAAGCATCA  
GTGACACTCTATCTTA

>NM\_000152.5 Homo sapiens alpha glucosidase (GAA), transcript variant 1, mRNA

CGACCCCGGAGTCTCCGCGGGCGGCCAGGGCGCGCGTGCGCGGAGGTGAGCCGGGCCGGGGCTGCGGGGC  
TTCCCTGAGCGCGGGCCGGGTGCGTGGGGCGGTGCGCTGCCC GCGCGGCCTCTCAGTTGGGAAAGCTGAG  
GTTGTCGCCGGGGCCGCGGGTGGAGGTGCGGGATGAGGCAGCAGGTAGGACAGTGACCTCGGTGACGCGA  
AGGACCCCGGCCACCTCTAGGTTCTCCTCGTCCGCCCGTTGTT CAGCGAGGGAGGCTCTGCGCGTGCCGC  
AGCTGACGGGGAAACTGAGGCACGGAGCGGGCCTGTAGGAGCTGTCCAGGCCATCTCCAACCATGGGAGT  
GAGGCACCCGCCCTGCTCCACCGGCTCCTGGCCGTCTGCGCCCTCGTGTCTTGGAACCGCTGCACTC  
CTGGGGCACATCCTACTCCATGATTTCTGCTGGTTCCCCGAGAGCTGAGTGGCTCCTCCCCAGTCCTGG  
AGGAGACTCACCAGCTCACCAGCAGGGAGCCAGCAGACCAGGGCCCCGGGATGCCAGGCACACCCCGG  
CCGTCCCAGAGCAGTGCCACACAGTGCGACGTCCCCCCAACAGCCGCTTCGATTGCGCCCCTGACAAG  
GCCATCACCAGGAACAGTGCGAGGCCCGCGGCTGTTGCTACATCCCTGCAAAGCAGGGGCTGCAGGGAG  
CCCAGATGGGGCAGCCCTGGTGCTTCTTCCACCCAGCTACCCAGCTACAAGCTGGAGAACCTGAGCTC  
CTCTGAAATGGGCTACACGGCCACCCTGACCCGTACCACCCCCACCTTCTTCCCCAAGGACATCCTGACC  
CTGCGGCTGGACGTGATGATGGAGACTGAGAACCGCTCCACTTCACGATCAAAGATCCAGCTAACAGGC  
GCTACGAGGTGCCCTTGAGACCCCGCATGTCCACAGCCGGGCACCGTCCCCACTCTACAGCGTGGAGTT  
CTCCGAGGAGCCCTTCGGGGTGATCGTGCGCCGGCAGCTGGACGGCCGCGTGCTGCTGAACACGACGGTG  
GCGCCCCTGTTCTTTGCGGACCAGTTCCTTCAGCTGTCCACCTCGCTGCCCTCGCAGTATATCACAGGCC  
TCGCCGAGCACCTCAGTCCCCTGATGCTCAGCACCACTGGACCAGGATCACCTGTGGAACCGGGACCT  
TGCGCCACGCCCCGGTGCGAACCTCTACGGGTCTCACCTTTCTACCTGGCGCTGGAGGACGGCGGGTCG  
GCACACGGGGTGTTCTGCTAAACAGCAATGCCATGGATGTGGTCCTGCAGCCGAGCCCTGCCCTTAGCT  
GGAGGTCGACAGGTGGGATCCTGGATGTCTACATCTTCTGGGCCAGAGCCCAAGAGCGTGGTGCAGCA  
GTACCTGGACGTTGTGGGATACCGTTTCATGCCGCCATACTGGGGCCTGGGCTTCCACCTGTGCCGCTGG  
GGCTACTCCTCCACCGCTATCACCCGCCAGGTGGTGGAGAACATGACCAGGGCCCACTTCCCCCTGGACG  
TCCAGTGGAACGACCTGGACTACATGGACTCCCGGAGGGACTTCACGTTCAACAAGGATGGCTTCCGGGA  
CTCCCCGGCCATGGTGCAGGAGCTGCACCAGGGCGGCCGGCGCTACATGATGATCGTGGATCCTGCCATC

AGCAGCTCGGGCCCTGCCGGGAGCTACAGGCCCTACGACGAGGGTCTGCGGAGGGGGGTTTTTCATCACCA  
ACGAGACCGGCCAGCCGCTGATTGGGAAGGTATGGCCCGGGTCCACTGCCTTCCCCGACTTCACCAACCC  
CACAGCCCTGGCCTGGTGGGAGGACATGGTGGCTGAGTTCCATGACCAGGTGCCCTTCGACGGCATGTGG  
ATTGACATGAACGAGCCTTCCAACCTCATCAGGGGCTCTGAGGACGGCTGCCCCAACAATGAGCTGGAGA  
ACCCACCCTACGTGCCTGGGGTGGTTGGGGGGACCCTCCAGGCGGCCACCATCTGTGCCTCCAGCCACCA  
GTTTCTCTCCACACACTACAACCTGCACAACCTCTACGGCCTGACCGAAGCCATCGCCTCCCACAGGGCG  
CTGGTGAAGGCTCGGGGGACACGCCATTTGTGATCTCCCGCTCGACCTTTGCTGGCCACGGCCGATACG  
CCGGCCACTGGACGGGGGACGTGTGGAGCTCCTGGGAGCAGCTCGCCTCCTCCGTGCCAGAAATCCTGCA  
GTTTAACCTGCTGGGGGTGCCTCTGGTCTGGGGCCGACGTCTGCGGCTTCTGGGCAACACCTCAGAGGAG  
CTGTGTGTGCGCTGGACCCAGCTGGGGGCCTTCTACCCCTTCATGCGGAACCACAACAGCCTGCTCAGTC  
TGCCCCAGGAGCCGTACAGCTTCAGCGAGCCGGCCAGCAGGCCATGAGGAAGGCCCTCACCTGCGCTA  
CGCACTCCTCCCCACCTCTACACACTGTTCCACCAGGCCACGTCTGCGGGGGAGACCGTGGCCCGGCC  
CTCTTCCTGGAGTTCCCCAAGGACTCTAGCACCTGGACTGTGGACCACCAGCTCCTGTGGGGGGAGGCC  
TGCTCATCACCCAGTGCTCCAGGCCGGGAAGGCCGAAGTGACTGGCTACTTCCCCTTGGGCACATGGTA  
CGACCTGCAGACGGTGCCAGTAGAGGCCCTTGGCAGCCTCCACCCCCACCTGCAGCTCCCCGTGAGCCA  
GCCATCCACAGCGAGGGGCAGTGGGTGACGCTGCCGGCCCCCTGGACACCATCAACGTCCACCTCCGGG  
CTGGGTACATCATCCCCCTGCAGGGCCCTGGCCTCACAACCACAGAGTCCCGCCAGCAGCCCATGGCCCT  
GGCTGTGGCCCTGACCAAGGGTGGGGAGGCCCGAGGGGAGCTGTTCTGGGACGATGGAGAGAGCCTGGAA  
GTGCTGGAGCGAGGGGCCTACACACAGGTCATCTTCTGCCAGGAATAACACGATCGTGAATGAGCTGG  
TACGTGTGACCAGTGAGGGAGCTGGCCTGCAGCTGCAGAAGGTGACTGTCCTGGGCGTGGCCACGGCGCC  
CCAGCAGGTCCTCTCCAACGGTGTCCCTGTCTCCAACCTTACCTACAGCCCCGACACCAAGGTCTGGAC  
ATCTGTGTCTCGCTGTTGATGGGAGAGCAGTTTCTCGTCAGCTGGTGTAGCCGGGCGGAGTGTGTTAGT  
CTCTCCAGAGGGAGGCTGGTTCCCCAGGGAAGCAGAGCCTGTGTGCGGGCAGCAGCTGTGTGCGGGCCTG  
GGGGTTGCATGTGTACCTGGAGCTGGGCACTAACCATTCCAAGCCGCCGATCGCTTGTTTCCACCTCC  
TGGGCCGGGGCTCTGGCCCCAACGTGTCTAGGAGAGCTTCTCCCTAGATCGCACTGTGGGCCGGGGCC

CTGGAGGGCTGCTCTGTGTTAATAAGATTGTAAGGTTTGCCCTCCTCACCTGTTGCCGGCATGCGGGTAG  
TATTAGCCACCCCCCTCCATCTGTTCCAGCACCGGAGAAGGGGGTGCTCAGGTGGAGGTGTGGGGTATG  
CACCTGAGCTCCTGCTTCGCGCCTGCTGCTCTGCCCCAACGCGACCGCTGCCCCGGCTGCCAGAGGGCTG  
GATGCCTGCCGGTCCCCGAGCAAGCCTGGGAACTCAGGAAAATTCACAGGACTTGGGAGATTCTAAATCT  
TAAGTGCAATTATTTTAATAAAAGGGGCATTTGGAATCAG

>NM\_007278.2 Homo sapiens GABA type A receptor-associated protein (GABARAP), mRNA  
GCAAATTCGTGGATCGCTCCGCTGAATCCGCCCCGCGCTCGCCGCCGTCGTCGCCGCCCCCGTCCCGGC  
CCCCCTGGGTTCCCTCAGCCCAGCCCTGTCCAGCCCGGTTCCCGGGAGGATGAAGTTCGTGTACAAAGAA  
GAGCATCCGTTTCGAGAAGCGCCGCTCTGAGGGCGAGAAGATCCGAAAGAAATACCCGGACCGGGTGCCGG  
TGATAGTAGAAAAGGCTCCCAAAGCTCGGATAGGAGACCTGGACAAAAGAAATACCTGGTGCCTTCTGA  
TCTCACAGTTGGTCAGTTCTACTTCTTGATCCGGAAGCGAATTCATCTCCGAGCTGAGGATGCCTTGTTT  
TTCTTTGTCAACAATGTCATTCCACCCACCAGTGCCACAATGGGTCAGCTGTACCAGGAACACCATGAAG  
AAGACTTCTTTCTCTACATTGCCTACAGTGACGAAAGTGTCTACGGTCTGTGAAGCTGCTGCCCCTGAGC  
TGGAGGGGGGTCTCATTCTACAAAGAGAGAGGTGGCCCCCTTTCTTGACCTCCTCCTCTCAAGCTCA  
AACACCACCTCCCTTATTCAGGACCGGCACTTCTTAATGTTTGTGGCTTTCTCTCCAGCCTCTCTTAGGA  
GGGGTAATGGTGGAGTTGGCATCTTGTAACCTCTCCTTTCTCCTTTCTCCCTTTCTCTGCCCGCCTTTC  
CCATCCTGCTGTAGACTTCTTGATTGTCAGTCTGTGTACATCCAGTGATTGTTTTGGTTTCTGTTCCCT  
TTCTGACTGCCCAAGGGGCTCAGAACCCAGCAATCCCTTCCTTTCACTACCTTCTTTTTTGGGGGTAGT  
TGGAAGGGACTGAAATTGTGGGGGGAAGGTAGGAGGCACATCAATAAAGAGGAAACCACCAAGCTGAACT  
GAATTTTGCCTTGTGTTGCTCCCCTCGTCCCGCTGATTTTAAGTCTTTCCAAGGTGTCAGTGGGTTTCAG  
TGGTGGGGAAAGAAGAGTACTGGGTACAAGCTGGAGGGATAGAAGTATATTTGGTTTATTCTGTTTCATG  
TTGGGCTTTTCCCTGTCTGCAAAAAGAGGGTGCTTTTGTGTGATGGAATGGAATACTGAGGATTATTTTC

TTGAAACTTTAGTTTTATAACACGCATGTGAACTAAATGTTAAAAATGCTCATGTAAAAAAAATTTTT  
TTTTACTGTGGGTTCTGTGGAGAAAGTTCCGAAGTACCTGCTTTAGGTGAACATCCACATTTGCTAGAA  
CATTCTAACTAAGATATTTTCATGTGTGCAAGCTAGTAAAACGGCTGTTCTCAGTTGCA

>NM\_001363598.2 Homo sapiens GABA type A receptor associated protein like 1 (GABARAPL1),  
transcript variant 1, mRNA

GTTTTGTGCTCCCAGCTCTAGCGAAAAGCCGCCGGTATTTCTCCATCTGGCTCTCCTCTACCTCCAGGC  
AGGCTACCCGAGATCCCCGCCCCGAACCCCCCTGCACACTCGGCCAGCGCTGTTGCCCCGGAGCGG  
ACGTTTCTGCAGCTATTCTGAGCACACCTTGACGTCGGCTGAGGGAGCGGGACAGGGTCAGCGGCGAAGG  
AGGCAGGCCCCGCGCGGGGATCTCGGAAGCCCTGCGGTGCATCATGAAGTTCCAGTACAAGGAGGACCAT  
CCCTTTGAGTATCGGAAAAAGGAAGGAGAAAAGATCCGGAAGAAATATCCGGACAGGGTCCCCGTGATTG  
TAGAGAAGGCTCCAAAAGCCAGGGTGCCTGATCTGGACAAGAGGAAGTACCTAGTGCCCTCTGACCTTAC  
TGTTGGCCAGTTCTACTTCTTAATCCGGAAGAGAATCCACCTGAGACCTGAGGACGCCTTATTCTTCTTT  
GTCAACAACACCATCCCTCCCACCAAGTGCTACCATGGGCCAACTGTATGAGGTAATGGTTCTGGTTGCAC  
AATACTGGATGCCGTCCAGTGCACTCTGGCATCCTCTAGCCCTTGTCTAGATGCGTTGATAACACATCT  
GAGAAGTGGGGCAGAAGGTGTTATTTATCCGGATCCTTTACATATGGCAGTGTAAGGCTCTGAGAGATT  
AGATACCTCTTGTTTTTTAGGGATTAGCCACTCTACTAGATTTAATCCTTCTGAAATCTTGCTGACTAT  
AGTCTTGTCTGACTATAGTGTTTTAATGCTGGACTGTTTATTGAAACAGCAGGAAGTGATTCCTGATAGC  
AAAAGTTCAAAGCGTCAGCCCATCGCAGTTCCTGCTATTCTGGTTGGTAGCATGTAATTTGTAATGCAT  
TCAGAATCCAGTTCATTATTTTACTCCATTTAGCAACAGATTGAGAAAGCACGT

>NM\_007285.7 Homo sapiens GABA type A receptor associated protein like 2 (GABARAPL2), mRNA  
AGTCGCCGCCGTCGCTGCCGCTGCCGCTGCCGCCGTCGTTGTTGTGTGCTCGGTGCGCTGAGCTCCGCG

GCTCCGCGAGCCGGTTCGGTCCCCTTCCCGCCGCCCATGAAGTGGATGTTCAAGGAGGACCACTCGCT  
GGAACACAGATGCGTGGAGTCCGCGAAGATTCGAGCGAAATATCCCGACAGGGTTCGGTGATTGTGGAA  
AAGGTCTCAGGCTCTCAGATTGTTGACATTGACAAACGGAAGTACTTGGTTCCATCTGATATCACTGTGG  
CTCAGTTCATGTGGATCATCAGGAAAAGGATCCAGCTTCCTTCTGAAAAGGCGATCTTCCTGTTTGTGGA  
TAAGACAGTCCCACAGTCCAGCCTAACTATGGGACAGCTTTACGAGAAGGAAAAAGATGAAGATGGATTCT  
TTATATGTGGCCTACAGCGGAGAGAACTTTTGGCTTCTGAGGGCCATTGCTGGGCTAGGTGCACCGTA  
ACTGCTTGTGTATCTTGTAATAGCCAGCCATTTTCAGTTATTATACCAGAACCTCTTCACATAGACCTA  
TTAGTGCAATTTGTAAGTGGATTTATTTCTTAATATATTGGAAGGTTTTGTTTCCTTAGACTAGTAAATTA  
TCATACAGAGTTTTATTTTGAGTTTTCTTTTTGTGCATTGCCTCATGCCTGTATTCTCCAGGAACTT  
GTCCTTCTGGAAATCATATTGAATGATATTTCTATATCGAAGTGAGGTAGGTGCGGTATTAAAGTGAAAG  
GGAAGGTGATGCATTTATTCTGGGTTATGCTTGAAGTGTTAGATGGCTAAGTATTAATTAATCCAAATT  
AAATCCTTAGCAGTCAGAACACTTGCTTCACTAGAATATGCCAACTGCCAATCATGTTGGACTGAGCTAA  
TTTGTTCCTCTTTCTGAACTATTAAGGTAAATAATTAACAATAAAAAATTCTTTATAAAGGCA

>NM\_002046.7 Homo sapiens glyceraldehyde-3-phosphate dehydrogenase (GAPDH), transcript variant 1, mRNA

GCTCTCTGCTCCTCTGTTCGACAGTCAGCCGCATCTTCTTTGCGTCGCCAGCCGAGCCACATCGCTCA  
GACACCATGGGGAAGGTGAAGGTCGGAGTCAACGGATTTGGTCGTATTGGGCGCCTGGTCACCAGGGCTG  
CTTTAACTCTGGTAAAGTGGATATTGTTGCCATCAATGACCCCTTCATTGACCTCAACTACATGGTTTA  
CATGTTCCAATATGATTCCACCCATGGCAAATTCATGGCACCGTCAAGGCTGAGAACGGGAAGCTTGTC  
ATCAATGGAAATCCCATCACCATCTTCAGGAGCGAGATCCCTCCAAAATCAAGTGGGGCGATGCTGGCG  
CTGAGTACGTCGTGGAGTCCACTGGCGTCTTCACCACCATGGAGAAGGCTGGGGCTCATTTGCAGGGGGG  
AGCCAAAAGGGTCATCATCTCTGCCCCCTCTGCTGATGCCCCCATGTTTCGTTCATGGGTGTGAACCATGAG  
AAGTATGACAACAGCCTCAAGATCATCAGCAATGCCTCCTGCACCACCAACTGCTTAGCACCCCTGGCCA

AGGTCATCCATGACAACCTTTGGTATCGTGGAAGGACTCATGACCACAGTCCATGCCATCACTGCCACCCA  
GAAGACTGTGGATGGCCCCTCCGGGAAACTGTGGCGTGATGGCCGCGGGGCTCTCCAGAACATCATCCCT  
GCCTCTACTGGCGCTGCCAAGGCTGTGGGCAAGGTCATCCCTGAGCTGAACGGGAAGCTCACTGGCATGG  
CCTTCGCTGTCCCCACTGCCAACGTGTCAGTGGTGGACCTGACCTGCCGTCTAGAAAAACCTGCCAAATA  
TGATGACATCAAGAAGGTGGTGAAGCAGGCGTCGGAGGGCCCCCTCAAGGGCATCCTGGGCTACACTGAG  
CACCAGGTGGTCTCCTCTGACTTCAACAGCGACACCCACTCCTCCACCTTTGACGCTGGGGCTGGCATTG  
CCCTCAACGACCACTTTGTCAAGCTCATTTCTGGTATGACAACGAATTTGGCTACAGCAACAGGGTGGT  
GGACCTCATGGCCACATGGCCTCCAAGGAGTAAGACCCCTGGACCACCAGCCCCAGCAAGAGCACAAGA  
GGAAGAGAGAGACCCTCACTGCTGGGGAGTCCCTGCCACACTCAGTCCCCACCACACTGAATCTCCCT  
CCTCACAGTTGCCATGTAGACCCCTTGAAGAGGGGAGGGGCCTAGGGAGCCGCACCTTGTCATGTACCAT  
CAATAAAGTACCCTGTGCTCAACCA

>NM\_006496.4 Homo sapiens G protein subunit alpha i3 (GNAI3), mRNA

GACGGAGAGGGCCACCGCCAGCAATAGACGGTGCCTCAGCCTGCCGAGCCGCAGTTTCCGTGGTGTGAG  
TGAGTCCGGGCCCCGTGTCCCCTCTCCCGCCGCCCATGGGCTGCACGTTGAGCGCCGAAGACAAGGCGG  
CAGTGGAGCGAAGCAAGATGATCGACCGCAACTTACGGGAGGACGGGGAAAAAGCGGCCAAAGAAGTGAA  
GCTGCTGCTACTCGGTGCTGGAGAATCTGGTAAAAGCACCATTGTGAAACAGATGAAAATCATTATGAG  
GATGGCTATTCAGAGGATGAATGTAAACAATATAAAGTAGTTGTCTACAGCAATACTATACAGTCCATCA  
TTGCAATCATAAGAGCCATGGGACGGCTAAAGATTGACTTTGGGGAAGCTGCCAGGGCAGATGATGCCCC  
GCAATTATTTGTTTTAGCTGGCAGTGCTGAAGAAGGAGTCATGACTCCAGAACTAGCAGGAGTGATTAAA  
CGGTTATGGCGAGATGGTGGGGTACAAGCTTGCTTCAGCAGATCCAGGGAATATCAGCTCAATGATTCTG  
CTTCATATTATCTAAATGATCTGGATAGAATATCCCAGTCTAACTACATTCCAACCTCAGCAAGATGTTCT

TCGGACGAGAGTGAAGACCACAGGCATTGTAGAAACACATTTACCTTCAAAGACCTATACTTCAAGATG  
TTTGATGTAGGTGGCCAAAGATCAGAACGAAAAAAGTGGATTCACTGTTTTGAGGGAGTGACAGCAATTA  
TCTTCTGTGTGGCCCTCAGTGATTATGACCTTGTTCTGGCTGAGGACGAGGAGATGAACCGAATGCATGA  
AAGCATGAAACTGTTTGACAGCATTGTGAATAACAAATGGTTTACAGAACTTCAATCATTCTCTTCCTT  
AACAAGAAAGACCTTTTTGAGGAAAAAATAAAGAGGAGTCCGTAACTATCTGTTATCCAGAATACACAG  
GTTCCAATACATATGAAGAGGCAGCTGCCTATATTCAATGCCAGTTTGAAGATCTGAACAGAAGAAAAGA  
TACCAAGGAGATCTATACTCACTTCACCTGTGCCACAGACACGAAGAATGTGCAGTTTGTTTTGATGCT  
GTTACAGATGTCATCATTAAAAACAACTTAAAGGAATGTGGACTTTATTGAGAAGCATGGATGTTAGTGA  
AAGTTACTACAGTGTGGAGTGTTGAGACCAGACACCTTTTGCTGTCTCATGGGGCAGCTACAAGCATGAA  
CGGGACCAGGGAATGGCAGCAGCATGCAGAATCTTAGCACTCTTAGCACAATATTTTGTATTAGGGAAC  
TTTTAATTGACATGAGATGCTAAAGTCAGACATTGGAATTGGAAGAACTATAAAGTGTGATTGATCGTC  
AAGACATCACTTGGATTTCTAATCTTAAATGCTTATGGAAGATGTGAAGTTGAGGTGCTGCATTCTAGA  
ACTTCAATATGTAGCTTACTCTTTTTTCCCCCTTCTTAAACCACCAGTGGTTCATTTTAAAGTTTTT  
TCATCAAGAGAAGAATAACTTTACTAAATTTTATTTCTTTATTTGCAAAGAATCTTTATTAACAAAC  
AATCTTAACTATGCACATGATGTGACCAGATCATCTTGAAAATATTCCTCTTTAGTAGGAACTCTTGTT  
TTTAACTCTTGGTATGGTCAGAATATAATACTTCCATAATTACTTATAATTCTTCCGGTTACTGGGGCT  
ATAAATACAACTTTTTAAATGAAATTTATGTTATTATCCTGCTCAAAGTACCATTATGGTTTCCATATGG  
TAATTACATTGAAAAGTTCTGCAATAAGATTCTAGTTCTCTCTTTCTTTAAGCTTATGGTTGAAGGTTA  
ACCTTGTTTGTGCAGATTACCAAATTACTGCTGATGTAGTATGATAAAGTCAGCTTCTTGGATACAGACA  
CACCCAGGGCAGCTGCCAATCAGAAATGCAAATTGCTAAATTCAAACAGAACCAGTGACTTTGCTGCTA  
CATATTTACTAAATTGACCACTTTGATTCTTGCTTGTTGTCTCAGTTATAGGGAGTTTTGTACATGGTG  
CCTCTGTTTTCCATCTTCATGGCCTTTTCTGTTGAGAAACATCTAAAGTGTATTAACAGTGCATGCTTT  
TACTTTGTAAATGTGGTGCCAAATCCCTGTTTGCCATCGTTTTTACTGTACCGATGTAACTGTAGTAAT  
CCTTAGCCAGTATGTTCTTTTGCTGAAACTGTTGCATTTTGGGACTTTTTTCCACTTTGTCATGTGTACA  
TTTTTAATCTGTTATAGTTGGCGGCAGTATTAAATGGTGAGTAAAGAGCCCAGGTTTGCTCCTGTTTGT

AACTAGTCTTTTCTGGAAATACTGTCTTCTGTTTCCTTTTGCCTTTCGAGAATGTGCTTTAGCCTTTGTC  
TGAGAATGGGTTTAGGTAGAAGGGTTTCCTGAAAGTCTAGTCTTTTGGTGTAATAGTATTGTTGAACCTT  
AGGTTTTATGTTATATCTGCATATGAGTGATATGTGATCATGATTCATTTTGCAGATTTACATTTTGCTT  
GTGTGGAAAGTTACGTTCACTTCAACCTACAGACCCTTTTGTATAATGTACAGCAAATGTCATTAAATAT  
TGAATGCTCTATTGGGGGAAGACAAATGAAGAGAATGCATTTTGAGCATTCAAATCAGTAGTTTGGGCA  
GTGCCTTTTGGGGTCCAATCTTTTGGATTGGATTCTATTTTCATCTTTTGATGTGACTTTTCACTAGTTT  
ACAAAAAAAGGTTGGTGGTCAACAAAAAAGCAAGTCATAGCAGTTCAGTGCCTTTGTTGGTAGTTTTT  
AACTTTTTTTGTGATTCTTTTGGAAAATCATAGCTTACAGATGGTATAACTGTATTATATAATGGAATT  
TTCTTTAGGTGTGGGAAAACCTGATCTGAAAGAAAATTATCAGCTTCAATTGGCGATTGATTCAGTGCCC  
ACAATGTAAACAGGGTTGGTAGTTGTTACTCATTTTGAATATACCTTTTCCTTATTGTATTCTGTAATAT  
AGGATCCTGGAAATGAGACCTGGTGGAAATATTATTTTCAACTGTAGTCTTCTATACTGTGGACTAATGA  
AATGGTGTTGTTGATAATCTAAAATAACCAATAATCCAAAAAAGTTCATTTTACTTTGAATTTGTATTTT  
CATTTGAATATCTATCTGATATGTTAAATTTTAGCCCTTCTGTAAAGAAAAATAGCAGGTCCCCATT  
TTCTGCCTCTGTACCATTACATTTGCTCTCTGTTTGTTAACATGAAGATCACTCTTATTTACCATCCC  
AAATAACTTATCTAAATGCACATTCCTTGAGGACACAGGGAGACAATTTAAGTCAGTAGTTTTTAATATG  
ACTTAAGTAAAAATCACTTGGACCCATCTAAGGGATTGACTTTTGGCTGGTGGGCTGGCAATCGATTTT  
TTTTTTTTTTTTTTTTTTGAGACGGAGTCTCGCTCTGTGCGCCAGGCTGGAGTGCAGTGGCGCGATCTC  
GGCTTATTGCAAGCTCTGCCTCCCGGGTTCATGCTATTCTCCTGCTGGGACTACCAGGTTCTGCCACCA  
CGCCAGCTAATTTTTTTGTATGTCTTAGTAGAGACGGGGTTTAACCGTGTTAGCCAGGATGGTCTTGAT  
CCCCTGACCTCGTGATCTGCCTGCCTCAGCCTCCCAAAGTGCTGGGATTACAGGCGTGAGCCACCGCACC  
TGGCTGGCAATTTATAATTTTTAAAAGGTGATTCTGATTACCAGCCAGGCTTGCAAATCACTGGTTTGTA  
TTGAAATAAAAGATATTTTCTTGAGCAGGGCTAAAATGTGGGATGAAACATTAAATCTACTAGCCTGAA  
AAAAAAGTTTGGCATTGTGAATCAAAGAAGCTGAAAGTTGCCTTGTTGTGTTTCCTCTGAAGAATGCTGGA  
GATTTGTGATGGATAATGTTTCAGAATTCAGGTGCCTATGCTTTGGACCATCAAAGAAGCCATTAGTCTC  
TGTGTAAAGAAGAAGTATTCTTAATGGACAGTCCCCCTAACCTTATAAATTCAGCTTTGCAACAGATT

CACCTCCTAGCATGAAAATTCCAAAAACTTTAACAATTACTCATAAGTGGATCTTGAGATGACATTTTCA  
TCTTGGACAGTTTGAATTCTAAATCTCTAGTTCACAGTGAATCGTTTTTTAAATTTTTACTGATGGATCG  
TTATTTTTCACAAGGTACTACATTCTTACAATGTAAGACTAGATGGACCAAATTTTAAAAAAACTTCT  
TGCCTTGTTTTTTAATTTTCATATATATTCTATTTGTTGTATATACACATTAGACTATTTTAAAAAAC  
AGCTGGTTTTTGTAAATTCATTCATTCACCCTATATTCTTATATTCTGCTCATTATTCTCTCATTATAGC  
TGTGACATTCTTTGGACATTACTTGCCTGGCCTGATTAGTTACTTAATATAATTTATTCATTTGCTTAGC  
ATGTGTGACATAGTTCTGGAATTCCTGTTGCAGAACTCCTTGCTGTATTGCAGTCATATATAAGGTAAA  
GTCAGTCTCTTGTTCTATTA AAAAGCTACCATTGATTATTTCCCTTTTACATGTTCAAAAAAAAAA  
AATAAGCAACCCTCTACTCATTTGTATAAACCTAAAACGTCAGTGTTCCTTGAGCGTTAGTACTTGTG  
GGTTCTTTCCTTTTCATGTGTAATACTGATTTTAAGAGCAATGATCTTAGTTTGCCAGTGCCAGGTAATT  
ATTGTGTTCTACTTTAGGCTTCGTAGTGCAAATCAGGGATCTGACCTGGATCAGCCTCAGCTCTTTACAT  
AGCTTTATGATCATCATATTTTGTGATTGCTCCCAACAAGCACAAAGAGAAAAAGGCAGGCTTCCTAGA  
GACCTCAAGTTGAAAGTTGATTTTGCTGACAACTATCAGGGAGTAAAAGAAAGCCTTTTTCAGGCACTGG  
AGAACTAACTTTAATGATGATCAAGGTCTTTATGCCTTTATCTTTTAGTTTTTAAGATCATTTCTCTCCC  
TCCTTTCCCCCAGTTTTCTCAACATTTATGAGTTAGTTCTGCTGAGAACAACATACTTCAGAACATGTC  
AGGATAGGGCAGTTTTTCTTGTTTTTCTTTTTTCTTTTTTGAGACAGTCTTGCTCTGTTGCCAGGCT  
GGAGTACAGTGGCACGATCTCTGCTCACTGCAACCTTGCCTCTTAGGTTCAAGCGATTCTTGTGCCTCA  
GCCTCCCAAGTAGCTGTGATTACAGGCATGTGCCACCACATCTGGCTAACTTTTGATTTCTAGTAGAGA  
CAGGGTTTCACCATGTTAGCCAGGCTGGTCTCAAACCTCCTGACCTCAAGTGATTGCTGCCTTGGCCTC  
CCAAAGTGCTGAGATTACAGATGTGAACCACTCCACCACTCAGGGCAGTTTTTTTTCTGATACCATATC  
AGGCCTAGGCCTGGGCTGACTCAAATCTTCTCAGGAATAAGAGGTAAGAAGGAATGTTAAACAGCAGTAG  
TTACCTGGGGTACATGGTTAATTTGATTTAGCAGATTCTTTGGCTAAACCCTAGTAAATTAATGTCTG  
AGCCAGGTCATGGGAATATACATGTTTTTAATACATTCCTTAGGTGATTTTGATGTAGCCAATCTGGGCC  
AACATTTGGGGACAACCTGAGTAGGACCTAATACAGGTTGAATAGCCCTTATCAAATCTCTTGGGACCAG  
AAGTGTGAGAGTTCAGATTTTGTGAGGTTTTGAAATATTTGCATTATATACTTATTGGTTCGGGATT

CCAAATCCAAAAATCTGAAATCCAAAATGCCCCAGTGTGTGCTTCCTTTGAGTGTTATGTTGTTACCCAA  
AAAGCTTTTGATTTTGGAGCATTTTAGATTTTGGATTTTCAGATTTGAAATGCTCAATCTATATTAAAGA  
TCAACACAGGCTGAGCACAGTGGCTCATGTCTGTAATCCCAGCACTTTGGGAGGCCGAGGTAAGCAGATC  
ACTTGAGGTCAGGAGTTTGAGACCAGCTTGCCAACATGGTGAAACCCCGTCTTTACTAAAAATACAAAA  
ATTAGCCAGGCATGGTGGTGGATGCCTGTAATCCTAGCTACTCGGGAGGCTGAGGCAGGAGAATCGCTTG  
AACCTGGGAGGCAGAGGTTGCAGTGAGCCGAGATCGCACCCTGAATTCCAGCCTGGGCGACAGAGTGAG  
TCTGTTTTTTTTTTGTTTTTTTTTAAAGTCAACACAAATATTGAAAAAAGCAACTTCAGTGACAAAATA  
AGCTCAAAATCACTAGTGAGTGATCTATTTTTTGCCAATAAGAAGTACCATTTGTACATGACTTAAAGTG  
CCTTCCACCAAGAAAATTATTGAAAACGTGTGGGTACATAACATTCCTACACTTTGGATACAGAGTATT  
TAGTTTTATACAAAATTAAGACAACAAGAAACCTAGGATGTCCAAACATTCATTTTATTTTACTGC  
ATTTATTTATGCAGTGAAAATTGAAAGATACACCAAATTAAGATAAAACCCTGTGACAGATAACAGTAT  
ATGTAATAACATGAATATTTATTTACACTTGGTAGAGAAAGCAAAGCTAGCTAGCTCTAAACTAGAAATGA  
AAGTCGTTTTGAAATGGGTACGGGGGTATATAAGGGGAATGATTGAGTCACATGTAAAAGCCTTTGTATG  
CCCAGTGCTAGTGTTTTCTGAAATCTAGTGAGAATCACAAGGTACCAGAAATAATCAAATAATAAATAT  
TAATACACTGCTGGGATAGAAGTATCTCAGTGTACCAGCATTCCTAAGCTATAAAATCTGTGACAGCAG  
GAATATTAAATTATGAACAACCTGGTTTATCTGTCTCCTCTTATCTTTTACCTCTCCCTACGCCCCAAAT  
TCTCCTTAGGTTATCCAGACATTTTTACTAAGATGCTTATTTATATGTAAGAGAGATTTCCAGTAGATAC  
AACAAAACACAAGAAATCACCTGTTCTGTTTATTCTTGCTCATGTAGGATAAAGGTCCTGAGACCTCTCA  
GAATCTTACGAGGTTGGAGAGTTGTTTGAATGCTGGGTCTGGTCTTGTCTCTGCTTCCAACCAGCTAT  
GGAATCTTGTGTATTCTTTCAGTCTTAAATCACTCATCTGTTATCTAAAGATGGACTAAATTATTCCTTC  
CTGCTGTGATATTCTGTGGTTCTCATCAGATAGAAATAACATATTTGAAAATGCTTTGTAAATGTTATGA  
TACTCAGGATTATACTGCACAGAAAAAAAAAAAAATCCTAAGGCAGCACCAACAAAGGTATTCAACGTAGTG  
GGTGGTCTTTTACAGCATTACTTTGCCCATATTCATTTTGAAGACCTGAAATGAAGTTGAACTATAAATT  
GCTCTAAAATTCGTGAAGCAGGGTGAAAAGGTCTTTGCTTTGTTTTACATTTAAATCCAGCTGTCTATTT  
TCTGCTTATACTAGTGCTTTTTTCATGGCAAAAAGACAGAAAAGTTCCTTCTGCAGTCTCCAGTGTCTTC

TGACCTCACAGAAATGTTTTCATGCTTTTACCTAGCAGGACCACCAGAGGCTCTGTCACACTTGCAGTCC  
CTGGCCCAACACCGAAATCCTTCTGGAATCTGTGCTCTGGGGGCTGTGCCGGGTAGAGAGGGCAGTGGGA  
GGTAAGAGCTCTTCACCTTCACCACCTTCTCCACCCAGCATGGCCGGCACAACCTTGGTCTACGGCACAT  
CTCCAAGTATAGAGTGGGTTTTGAATGCTGTTATGTCTCACCGTGGGGATGGGAAGGAATACTCTGTTTT  
GGACTATTTGGAGGTACATGTGAGTGGATTTTATTACCAGAGTAGGAACTGTTTCAAGTTAATGTGTCTT  
TTATGTTGCTTTTAAGACAACCTTTGTGCCGCTTTTATCCATTCTTCCTTTTATCCACAGAAATACAAAT  
TTCTAATTATAGTATATTTTTCTATTTTTAAAATTGTGATAAAGCATATATAACAAAATTTGCCATCTT  
AAGTGTACAGTTCAGTGGCATTAAGTACATTCACACTGTTGCACAGCCATCACCACCATCCATTTCCAGA  
ACTTGTTTTCATCTTCCTGAACTGAAACTCTGTACCTGTTAAACAGTAACTCCCCATGCCCCACCTTCTT  
TCAGCCCCTGGTAACCAGCATTTTCCTTTGTCTCTATGAATTTGACTATTTTAGATACCTCATATAAGTG  
GAATCATAGTATTTGTCCTTTTGTGTCAATCATATTGTATTTTTGTCTAAAAAAGGAAAACTATCAGATT  
TATGTGAAATGTAACGTAATTTACATTTGATTTACTGTTAGTAATGTCTCTTTAATCATGCTATGCTAGG  
GAAGTACATTATGGTCTCTCCCTCTAAGAATATGAAGAGGAAATTTACCTTCAACAAACAAGCAAACCTT  
AGTTATATTTTTGTGATTTTATGCTGTTTTCATATTCTATTTTGAGATCTATTTGTCTTAGCTTGGAGGT  
GGTTTTGTAAATGTCCACGATTTAGAGACGGCATAATGAAAAAATGACCAAGAATTTGGTTGGGAATGG  
GAGGAGCTTAGAAGAACAAGAAATTGGCTTTGATTTTATAGTGTATGGTGCTCTGTTGGTAGCTGGACAT  
CATCACAGGCTTTGGATTGAGAAGACCTGTTCTGGAGTTCTAGTTCTGCTACTGCCTAGCGTTGTGATCT  
TGATGAAGATACTCTTCCTTCCTGGGCTTCAGTTTTTGATCTATAAATTGCTAGTGATGGGGCTGGACTA  
TTTTTAAGTTTGTTCTAACTTTAGCAGTCTTAAGAATTAAGGTTGCATGCCAGAAAATAGGGTTAAATAT  
TTGTTTCTGATCTGGTTACAAAAAAAAAAAAAACTTGATGGCTTAAAGTAAATAAAAAATTCAACAGTACG  
GTGTAAATTTAAAA

>NM\_020399.4 Homo sapiens golgi associated PDZ and coiled-coil motif containing (GOPC), transcript variant 1, mRNA

GGGACTGACTGAGTCTTCCGTGTGTCGCCGCCGTTGCCGCCTCAGCTTCAGCCTCGTTACTCCTGCGGTT  
CTGTGACTGTGCTGCTGGCGTTAACGGCGCGAGGTGAAGGGAGGTGACGGAGTGTGCCCGCGCGCGCGGG  
GGTCCCCTCAGTCCCAGCAGTTCCTTCGTGCGCGGGGGGCGGCGAGGGTCTTCAGCAGTCGGGAGAGGC  
CCTTGACGGCGCCATGTGCGCGGGCGGTCCATGCCCAGCAGCAGCCGGAGGGGGCCCAGGGGGCGCCTCC  
TGCTCCGTGGGGGCCCTGGCGGGGTATCCATGTTCCGGTGGCTGGAGGTGCTGGAGAAGGAGTTCGACA  
AAGCTTTTGTGGATGTGGATCTGCTCCTGGGAGAGATCGATCCAGACCAAGCGGACATCACTTATGAGGG  
GCGACAGAAGATGACCAGCCTGAGCTCCTGCTTTGCACAGCTTTGCCACAAAGCCCAGTCTGTGTCTCAA  
ATCAACCACAAGCTGGAGGCACAGTTGGTGGATCTGAAATCTGAACTGACAGAAACCCAAGCAGAGAAAG  
TTGTTTTGGAGAAAGAAGTACATGATCAGCTTTTACAGCTGCACTCTATTTCAGCTGCAGCTTCATGCTAA  
AACTGGTCAAAGTGCTGACTCTGGTACCATTAAGGCAAAATTGTCTGGCCCCTCTGTGGAGGAGCTGGAA  
AGAGAGCTTGAGGCAAAACAAAAAAGAAAAATGAAAGAAGCACAACTTGAAGCTGAAGTGAAATTGTTGA  
GAAAAGAGAATGAAGCCCTTCGTAGACATATAGCTGTTCTCCAGGCTGAAGTATATGGGGCGAGACTAGC  
TGCCAAGTACTTGGATAAGGAACTGGCAGGAAGGGTCCAACAGATACAATTGCTAGGACGAGATATGAAG  
GGACCTGCTCATGATAAGCTTTGGAACCAATTAGAAGCTGAAATACATTTGCATCGTCACAAAACCTGTGA  
TCCGAGCCTGCAGAGGACGTAATGACTTGAAACGACCAATGCAAGCACCACCAGGCCATGATCAAGATTC  
CCTAAAGAAAAGCCAAGGTGTTGGTCCAATTAGAAAAGTTCTCCTCCTTAAGGAAGATCATGAAGGCCTT  
GGCATTTCATTACAGGTGGGAAAGAACATGGTGTTCATCCTCATCTCTGAGATCCATCCGGGGCAAC  
CTGCTGATAGATGCGGAGGGCTGCACGTTGGGGATGCTATTTTGGCAGTCAACGGAGTTAACCTAAGGGA  
CACAAAGCATAAAGAAGCTGTAACCTATTCTTCTCAGCAGAGAGGAGAGATTGAATTTGAAGTAGTTTAT  
GTGGCTCCTGAAGTGGATTCTGATGATGAAAACGTAGAGTATGAAGATGAGAGTGGACATCGTTACCGTT  
TGTACCTTGATGAGTTAGAAGGAGGTGGTAACCTGGTGCTAGTTGCAAAGACACAAGTGGGGAAATCAA  
AGTATTACAAGGATTTAATAAGAAGGCAGTAACTGACACACATGAAAATGGAGACCTGGGCACTGCAAGT  
GAAACTCCGCTAGATGACGGTGCTTCAAAATTAGATGATCTGCACACTCTGTATCATAAAAAATCTTATT  
AAATTGACCATATCTCCAGACAAGATTGTTAATCAGACTATTCTGAATTTGGGGCACTGGGGAAGATGGT

GACAAAGACTACAAAATCAGGGGAGGCTGTTTGTTCCTAAATGAAAGGCGGGTACCTCAGGGCTTCATG  
TGAACAATTCTCAATGCATAAAACACCCTGTTTTCTGTGGTAGACCATAATTAGCTATTGCATGTAAAGC  
AATTTTGATTTTCTTGAACCTGTAAGCACCAAAGCATGTGTTTCCCAAAGGGGTATTACTGGGCTCTTAA  
GTACCAAATGAAACCCTACTGTTTTACTTGTTCCTTTTCCCTTTAGTAGGAGGACAGTGCTAACTGGAA  
TTTTATAAGGAGTACCCTTTAAAATACAGAGAGTAAGTGAATTCATATTTATATTCTAGAATGTAACT  
GTGGTATTTCAGAAGACAGAGCTTGACTCAATGAATTGTAGAAATATAGGCTTGACTTAATTTTTGTAAC  
TGAAAGGCTTTAGACTTAAAAAATTTATTGTGCATCCTAAATCTAAACCAATTATTAATGATCATTTA  
TTGTAATGAGTTTGCATTTCAGCTTTATTCAATGCAGTACAAAATAGTTTTCTTTAAGCAGTCTTTTATC  
AATCAATGCTGCACTAGAAATAGATTCTCAAAGTTACTAAACATTTTACTTTTTTTGTTTTTAAAAGA  
AATGCAGATGAGTGTA AACATCTGTTCTCAATTATGTTGATCTGTGTGCGCAGTACTGGAGCATTTACC  
CATTCATGTTGAGCCTCAAATGCTTGTTTTCTGGGGTCCACAAAAGACAGTTTTATACATTTTGAGTTGT  
TCATAAAGTTTGTCTTGATAGTCCTGGCACTTAAAGACAAATTTTTCTGGTAGTAAAAGTTCAGATTT  
ATTACTATGTCATGAAACACAGTACATTCAAATCAAACGGCAGTTTTCTTTCTAAGTAAATGATTCCAG  
TCATCTAAAAGGTGGGCAAGATGAGATAAAGACATTTTGATACAGTAATTGTTTTGGTTGGGTTTTCATG  
TCAGTTTATGTTTGACTAAAGCTCTCTTCATATGCAGGTTTATAAATTTGTTAGGTCTGTTGTCCCATGA  
TTAAACATGGAGTGCCTCCTCTCTGATTTAATATTCTGCAGGTCATTGTAACCTGCTAGGCAAAGTCACA  
ACATTGCATTAAAGAGGTGATAGCTTTGCTAATATCACTGTTTTAAAGGACGTACAGTTAAAGGAATATT  
AAGTGGGAGAAAGCCTACAAGGCTTTTAGAATATTATCAGTATCTTCATTTCTGGTATTCAGATGTTATG  
TGATAAAACACATTTTTTTTTGGCTTTCCAGATACACTATATATTTGTTCAAGGGTAAATCTATAAAATG  
TATATACTTTATTTTGTGGTTTTGCTATTTATAAATTTAATGTTTAACTGTTGCTCATTTATGGTTTGT  
TTTGGGTGGTGGTGTTCTGTATATCACCATGTTAATTTGTAATGGAAGTGCACCTTCGTAGTGTATAT  
TGTTACTGACATTAAAATACTTTATAGCATTGTCTCTGAGCAAAAGCTAGTATTTAATTGTACAAATGAA  
TAAGCAAGTTACATGTTATTGTTTGCTCTTGACAGGGTAGGCCTCTTAAAGAAAAAAAAACAACCTGTTT  
TTTCTTTATGAATCCCCTATGCCAAACACATACCTCCATGCATGACATGAGATCTGCAAACTGGATTTT  
AGCCACCGTATTTATTTAGTCAAAAAAATTGTCCATTGTAGCAGACCCGAAAACCTTTTTGCTGTGACAT

GAAACCATGTTATTCTTATCTTCTTAAAACACAGCCTGGGATGGAATGGCCATGGCATTTTTTTCAGAGA  
ACATCCTTTATCTGCTATGACTGAATCCTTAGGAAATGTAAGCTATAACCCTTGATTTTCAAGAACTAC  
CGAATAAGTGTATGAAGAGGTGGTTTTTTAAAACCTCAAGTTGGAATTTTTATGAGGTCACTGTGTAATT  
TGAAGAATTGTGTGAGATTGTCATGATATAAATTCCTTTTAAGGACTGATAAATAGAATGAAAAGTTTCC  
AGGTAGTTTAAAACCCACAGGTCAGTTTCCTTTTCATTCTGCTTCACTGTGGTTTATAAGCCTACGGG  
AGAGCACCGTTGCTCAGATGCTACTGTGAGCTTCCTGTCCGGTGTTAGAAAGTAACTAGTTAAAAGTTCA  
TTTTAGAATGTATGGTTTTTGGGGATGAACTAAGAATTAGTTATTAGTTCCAAAGGACTGAGAACCAATT  
TTAATATTTTCACATTTATAGGAAAGAAATTCATATGTCCCTGAACTTCTAGGACAAAACCAAACAAGT  
AAGGAGGGAACTGTTGCAAAGCCATTTTCATCGAGAAGGGGACAGAAGGAGAAATACACACATGTATACAC  
AAACAGAATGGTTGAGAAAACGTTTTAATAAAATGTGAGGGTTGTATGTGTGCGTGTATATATTACACT  
TAACCTCTAAAATTCTCTTCTACAGTATCTCTGTTATGAATATGATGGAAAAGCAACATTTTGGTGGTGA  
GACTATTGTTAAAATAAATTTGAGAAAGACGAAAATTTGTGAGTCTTGATAATTACAAGTCAACAGCTA  
TCGAAAGTTAGCACAGCTTGTCTGTGGTGCTGTTTTTTTCCCACTGCAGTGGACTTATGCTGTTTTCAT  
GTTTAGAAACAAAAAGGTTTCATGTGATTCATGTGTAAGATGCACAGTATTTGACATCCTGATTATGTAA  
TCCCTATTCCATCTATCCAGTCTTACACTTATGGTTGGCCTCAAATCTATTGCATTTATGATAATGTATT  
ATATCTAGTTGAGTTTAATATTTTTTTATTAGCCTGTAAATAAAGATGGCATCTTCTACATTAATATGAT  
ATTGATCTCATTTTTTTAAATAAACATTTTGTTTCCTTGACGTAAA

>NM\_017551.3 Homo sapiens glutamate ionotropic receptor delta type subunit 1 (GRID1), mRNA  
AGTTCGCTCCTCGCCGGGGCTCAGACACACAGCCAGCCAGAGCCGCCACGCCGGCCCGGCCGCCGCCG  
CACCGCCTCAGCCTCCCCGAAGCCGCTCTAGCCGCGGGAAGCGCCGCTGCCACAGCCGCGGGCCGCC  
CGCCGCGCCGGCCTGGGCTCAAGCTGCCAGCACCGCCGCGAGCCGCCACGGAGCCGGAGCGGGAGCCCCGA

CCGCGCTGGGCTGGGCTGGGCTGGGCTGGGGCGGGCGCAGGGCGCAGGGGCGGGCGCGCGGGGGAAGACG  
CACGGGCGGGCTCGGCTCTCCCGGGAGCGGCCCGGGACTGCACCGGGACCAGCGCCTCCCCGCTTCGCG  
CTGCCCTCGGCCTCGCCCCGGGCCCGGTGGATGAGCCGCGCGCCCGGGGGACATGGAAGCGCTGACGCT  
GTGGCTTCTCCCCTGGATATGCCAGTGCGTGTGCGGTGCGGGCCGACTCCATCATCCACATCGGTGCCATC  
TTCGAGGAGAACGCGGCCAAGGACGACAGGGTGTTCCAGTTGGCGGTATCCGACCTGAGCCTCAACGATG  
ACATCCTGCAGAGCGAGAAGATCACCTACTCCATCAAGGTCATCGAGGCCAACAACCCATTCCAGGCTGT  
GCAGGAAGCCTGTGACCTCATGACCCAGGGGATTTTGGCCTTGGTCACGTCCACTGGCTGTGCATCTGCC  
AATGCCCTGCAGTCCCTCACGGATGCCATGCACATCCCACACCTCTTTGTCCAGCGCAACCCGGGAGGGT  
CGCCACGCACCGCATGCCACCTGAACCCAGCCCCGATGGTGAGGCCTACACACTGGCTTCGAGACCACC  
CGTCCGCCTCAATGATGTCATGCTCAGGCTGGTGACGGAGCTGCGCTGGCAGAAAGTTCGTCATGTTCTAC  
GACAGCGAGTATGATATCCGTGGGCTTCAAAGCTTTCTGGACCAGGCCTCGCGGCTGGGCCTTGACGTCT  
CTTTACAAAAGGTGGACAAGAACATTAGCCACGTATTCACCAGCCTCTTCACCACGATGAAGACAGAGGA  
GCTGAATCGCTACCGGGACACGCTTCGCCGCGCCATCCTGCTGCTCAGCCCACAGGGAGCCCACTCCTTC  
ATCAACGAGGCCGTGGAGACCAACCTGGCTTCCAAGGACAGCCACTGGGTCTTTGTGAATGAGGAAATCA  
GTGACCCGGAGATCCTGGATCTGGTCCATAGTGCCCTTGGAAGGATGACCGTGGTCCGGCAAATCTTTCC  
GTCTGCAAAGGACAATCAGAAATGCACGAGGAACAACCACCGCATCTCCTCCCTGCTCTGCGACCCCCAG  
GAAGGCTACCTCCAGATGCTGCAGATCTCCAACCTCTATCTGTATGACAGTGTTCTGATGCTGGCCAACG  
CCTTTCACAGGAAGCTGGAGGACCGGAAGTGGCATAGCATGGCGAGCCTCAACTGCATACGGAAATCCAC  
TAAGCCATGGAATGGTGGGAGGTCCATGCTGGATACCATCAAAAAGGGCCACATCACTGGCCTCACTGGG  
GTGATGGAGTTTCGGGAGGACAGTTCGAATCCCTATGTCCAGTTTGAAATCCTTGGCACTACCTATAGTG  
AGACTTTTGGCAAAGACATGCGCAAGTTGGCGACATGGGACTCAGAGAAGGGCTTGAATGGCAGCTTGCA  
AGAGAGGCCCATGGGCAGCCGCTCCAAGGATTGACTCTTAAAGTGGTGACTGTCTTGGAAGAGCCTTTC  
GTGATGGTGGCTGAGAACATCCTAGGACAGCCCAAGCGCTACAAAGGGTTCTCCATAGATGTCCTGGATG  
CACTGGCCAAGGCTCTGGGCTTTAAATATGAGATTTACCAAGCCCCTGATGGCAGGTACGGTCACCAGCT  
CCATAACACCTCCTGGAACGGGATGATCGGGGAGCTCATCAGCAAGAGAGCAGACTTGGCCATCTCTGCC

ATCACCATCACCCAGAGAGGGAGAGCGTTGTGGACTTCAGCAAGCGGTACATGGACTATTCAGTGGGGA  
TTCTAATTAAGAAGCCCGAGGAGAAAATCAGCATCTTCTCCCTCTTTGCTCCATTTGATTTGCTGTGTG  
GGCCTGCATTGCAGCAGCCATCCCTGTGGTTGGTGTGCTGATATTTGTGTTGAACAGGATACAGGCTGTG  
AGGGCTCAGAGTGCTGCCCAGCCCAGGCCGTGAGCTTCTGCCACTCTGCACAGCGCCATCTGGATTGTCT  
ATGGAGCCTTCGTACAGCAAGGTGGCGAATCTTCGTGAACTCCATGGCCATGCGCATCGTGATGGGCAG  
CTGGTGGCTCTTCACGCTCATTGTGTGCTCCTCCTACACAGCCAACCTTGCTGCCTTCCTCACAGTGTCC  
AGGATGGACAACCCATAAGGACTTTCCAGGACCTGTCCAAACAAGTGAAATGTCTTATGGCACTGTCC  
GGGATTCTGCTGTATATGAGTACTTCGAGCCAAGGGCACCAACCCCTGGAGCAGGACAGCACGTTTGC  
TGA ACTCTGGCGGACCATCAGCAAGAACGGAGGGGCTGACA ACTGCGTGTCAGTCTTCAGAAGGCATC  
AGGAAGGCAAAGAAGGGGA ACTACGCCTTCCTGTGGGATGTGGCCGTGGTGGAATACGCAGCCCTGACGG  
ATGACGACTGCTCGGTGACTGTCATCGGCAACAGCATCAGCAGCAAGGGTTACGGGATTGCCCTGCAGCA  
TGGCAGCCCCACAGGGACCTCTTCTCCCAGAGGATCCTGGAGCTGCAGGACACAGGGGACCTGGATGTG  
CTGAAGCAGAAGTGGTGGCCGCACATGGGCCGCTGTGACCTCACCAGCCATGCCAGCGCCCAGGCCGACG  
GCAAATCCCTCAAGCTGCACAGCTTCGCCGGGGTCTTCTGCATCCTGGCCATTGGCCTGCTCCTGGCCTG  
CCTGGTGGCTGCCCTGGAGTTGTGGTGGAACAGCAACCGGTGCCACCAGGAGACCCCCAAGGAGGACAAA  
GAAGTGA ACTTGAGCAGGTCCACCGGCGCATGAACAGCCTCATGGATGAAGACATTGCTCACAAGCAGA  
TTTCCCCAGCGTCGATTGAGCTCTCGGCCCTGGAGATGGGGGGCCTGGCTCCCACCCAGACCTTGAGCC  
GACACGGGAGTACCAGAACACCCAGCTCTCGGTGAGCACCTTTCTGCCAGAGCAGAGCAGCCATGGCACC  
AGCCGGACACTCTCATCAGGGCCCAGCAGCAACCTGCCGCTGCCGCTGAGCAGCTCGGCGACCATGCCCT  
CCATGCAGTGCAAACACAGGTCACCCAACGGGGGGGCTGTTCCGGCAGAGCCCGGTGAAGACCCCCATCCC  
CATGTCCTTCCAGCCCGTGCCTGGAGGCGTCCTTCCAGAGGCTCTGGACACCTCCCACGGGACCTCCATC  
TGACTGCGCCGCTGCCCTCCTGCCACCTCCCACCCACCCGACCAGCAGAGCTTTTAAATACAAGAAA  
ACAACAACACAAACCACACACACTCGCACACACACATACACAGAGACTCTTTCATTTTTCTGTACAT  
ATGTGTAAATAATGACAGAATGGAGTGGGGTAAAAGTGTATTTGAATATTCCCAATTTTGAAGTCAGT  
AAAAAACACAAAACTGTATGAATGACTTTGTAAATTTGTCTATATGAATAAAAAGGCAAATTACTT

GTGATCATTCTGAAGTGCCAAAGGAGCCCCCATTCTGGGCCTTTCTGAGGGCAGGAGGGGCGACCAG  
ATAAGGAGCCCCTCTCTGCTGGGGGAGAAGGGAAGACGAGGAACCCACATGCCACTCGCTGCCTTGTC  
CACAGCTTGCTGCCCCATTTCTTTGCTCCTGGCACCTCGTCCCTTTTAGTCCCTCAGCTTGATAAAGAGT  
GAGTTTGGAGCCCGCATTGGGCTGGCCCACTGGGTTGCTGTGCTGTAGGGTGATCGGCTGTTCTGGGTAG  
CCTGGGGCTGAGGAGGTGCCCTGGACTCAGGGCTATCCTGTCTGTCTTGATCTTGCGGGACGAGTTAG  
TCACCGCTGTGTGTGTTGCAGTGTGCCTCTGCCCCATGGGCCCGAGAGAAGCTGACAATTACCCATAGT  
AGGTAATTGAGGGCTTTGATACTGAGCTGTTCTCATATCATACTGTTGGCCTTGTTTTTCATTTTCTTT  
CAAAATTAGAAGAATCAAAAAGTGATAGAATATTGGGGGAAGGAGGGCAGACTCCATCGTTTCCTCAGGG  
AGACTGGGCGGAGGTGGGGTTGGTCTGGAAGAAGGTCCATGGGGGCAGGGAGTTGCGAGGTGGGGTTAGT  
TGCATGGACCAGGTGAGGTGGTGGAAACAAAAGGCCAGGTAGAGGAAGAATATTCCCTTGGGTTTGGACCC  
ATGGTCCCAGGTGAGAGAAGGAAGTGAGGCCATAGATGCAGGGAGTAGAAGCTTTGTGGTGTGAGGCAAA  
CGGACTCTGTTAGTAAGAGTTGGGGGAGGTGCCAGGTGGGTGGACCAGTACTCCAGGTGATGGGGCATG  
CTGAGAAATAGAGAAAAGAGACCATGTTTATTTGGGTAGGAGGAAGCCTTGCCTTGCCTTAGGTGAGA  
AGCATAAGTGTAACCTCCATCCACCAGGGAAGTTGCTTGTAGCCCCAAAAGTAAAGGCCTATCTCTGGGT  
CATAAATCCTGCAGGCAGTCCAACAAACAGGGCTGGCTCCAGCACAACTCTCCCTTCCACCTTTACGAC  
CCTCTCCAGACCAGACCTGGAGTCCTCTTCAAGCAGCAATCCAACCCAGAGCAGGGGCCCTCCCCACTCA  
GGCATCTGATAACCTCTGAGATTTCCAGGCCTATCCCTGTGCAGGTACAGCTGCAGGGAAGCCCAGTTTT  
CTAAGCCTAGGACCACCTAACAGCGCCCCCTCCTTCAGTTGCCCTTTCTGAGGCAACTAACTACAGAAT  
CAGGGAAAGAACCATTAGGAGTGGAAGTGGGGGAATCTGAGTTGTGTCACTTCAGTTCCTCTCCTAAAGA  
CAAAGGTTAGTCTGATCTCCAGACCCGTGAGAATGGAATACACAGCCCACATCTGTCACTGAAGGAGGTG  
GAGCTCCACAGCCAGCAGTAATCAGGGAGCTGAGAGCCTGGTTCTGTGATCATGGAGAAATACAAAGTC  
CTATTGATTGCTTCTTCTATAGCCTGTAGAGTTTCTAGAGAGATGTATTTATGAGGGTGATAACTAGCC  
CAGGATTGATTTCTTCTCTAAAGTCCCTAGTGACATGATTGAGCAGTAAAGAACGGCCAAATCACACAGT  
CAGCTAAAAGCACTGTGGGGAAGAGAGTGTTTATAATTATGTTATTTATTGCTGGATGCTGAGAATGGTC  
TGATATTCGTGCTACCTAGGCAATCCATTGACATTTCTCCAATCAGAGCATGTGGACCTTGAGCCAGGC

>NM\_001286838.1 Homo sapiens glutamate ionotropic receptor delta type subunit 2 (GRID2), transcript variant 2, mRNA

TGCAAAACAACTCTGGCGATGCCAAAATCCCCTCCAAGTGACACGGCTTTGCGAAGGAGGTTTCCTCAGG  
CTGGGCTCTTTCTGTCATTCCCTTCTGCCTTTCTCGGCGACGATAAAAGGCTTTGCTCTGGCAATAGGAA  
TTTAGAAAAAAGAAAAAGCTGCGCTAACTCCACCGTGACCTCAAACCTTTGGACTGTTTGAAAAAA  
AAAAATTGGAAGAAAATCCATCCTCCAAGAGAATCGGCATAGGAGGAGATGGAAGTTTTCCCCTTCTCT  
TGGTTTTGTCCGTCTGGTGGTCTCGAACCTGGGACTCGGCGAATGCGGATTCGATCATTACATCGGAGC  
AATTTTTGATGAATCTGCCAAAAAGGATGATGAGGTATTCGCACTGCGGTTGGTGACCTTAACCAGAAT  
GAGGAGATCTTACAGACTGAGAAAATCACATTTTCAGTGACGTTTGTTGATGGCAACAACCCTTCCAAG  
CAGTTCAAGAAGATATCCGTGGAATACAGGAGTTCTTGGACAAAGTCTCTCAGCAGGGAATGGATGTTGC  
ACTTCAGAAGGTAGAAAACAACATCAATAAAATGATTACCACTCTCTTGACACCATGAGAATAGAAGAA  
CTGAATCGCTATCGAGACACTCTTAGGCGAGCGATCCTTGTTATGAATCCTGCTACAGCCAAATCCTTCA  
TTACTGAGGTTGTGGAGACTAATTTGGTTGCTTTTGACTGTCACTGGATCATTATAAATGAGGAAAATAAA

CGATGTGGACGTACAGGAACCTGTAAGAAGGTCAATTGGAAGGTAAACGATTATTCGGCAGACATTTCCA  
GTTCCCCAGAACATAAGTCAGCGGTGTTTCCGTGGCAACCATCGAATATCTTCAACATTGTGTGATCCAA  
AGGATCCATTTGCTCAGAATATGGAGATTTCCAACCTTTACATATATGACACGGTGCTTCTGCTTGCTAA  
TGCTTTTCATAAGAAGCTGGAGGACCGAAAGTGGCACAGCATGGCAAGTCTGTCATGTATCAGAAAGAAC  
TCAAAGCCCTGGCAGGGTGGGCGCTCCATGTTGGAGACCATCAAGAAGGGTGGAGTTAGTGGGTTGACTG  
GAGAGCTAGAATTTGGAGAAAATGGAGGCAATCCCAATGTCCACTTTGAAATCCTTGGAACCAACTATGG  
AGAAGAGCTTGGCAGAGGTGTTGAAAACCTGGTTGCTGGAATCCTGTCACAGGTCTGAATGGGTCACTG  
ACTGACAAGAAATTGGAGAATAACATGCGTGGAGTGGTTCTACGTGTAGTAACTGTTCTGGAAGAACCTT  
TTGTGATGGTCTCTGAAAATGTCTTGGGTAAAGCCGAAGAAATACCAGGGCTTCTCCATTGATGTTTTGGA  
TGCCTTATCTAACTACCTGGGTTTTAACTACGAAATTTACGTAGCACCGGATCACAAATACGGAAGCCCA  
CAAGAAGATGGGACATGGAATGGCTTGGTAGGAGAACTTGTCTTTAAGAGAGCCGACATAGGGATTCTG  
CTTTAACCATCACTCCAGATCGTGAAAATGTGGTGGACTTTACGACACGTTACATGGACTACTCAGTGGG  
GGTACTACTTCGAAGGGCTGAAAAGACAGTGGATATGTTTGCCTGTCTTGCAACATTTGATCTCTCTCTA  
TGGGCTTGCAATTGCTGGCACAGTCCTTCTGGTGGGTCTACTGGTCTACCTCTTGAAGTGGCTTAATCCCC  
CACGATTACAAATGGGATCAATGACGTCTACTCTCTACAACCTCCATGTGGTTTGTGTATGGATCTTT  
TGTACAACAAGGCGGGGAAGTCCCGTACACGACTCTGGCTACCCGAATGATGATGGGGGCTTGGTGGCTA  
TTTGCTTTGATTGTTATCTCATCTTACACGGCAAACCTCGCTGCTTTCCTCACTATTACACGCATTGAAA  
GTTCCATCCAGTCTCTCCAGGACCTTTCCAAGCAAACAGAAATCCCTTATGGCACAGTCCTAGACTCTGC  
GGTATATGAGCATGTCCGCATGAAAGGACTGAATCCTTTTGAGAGGGACAGCATGTATTCCCAAATGTGG  
CGGATGATCAACCGAAGCAATGGATCGGAGAACAATGTTCTGGAGTCCCAGGCAGGCATTCAAAGGTAA  
AATATGGAAATTATGCTTTCGTATGGGATGCAGCTGTATTGGAATATGTGGCTATCAATGACCCAGATTG  
TTCCTTTTACACCATTGGAAATACTGTTGCTGATCGGGGATATGGAATTGCATTACAACATGGCAGTCCT  
TACCGAGATGTTTTTTCACAAAGGATCCTGGAGCTTCAGCAGAATGGTGACATGGACATCCTGAAGCACA  
AATGGTGGCCTAAGAATGGCCAGTGTGACCTGTACTCGTCAGTGGACACAAAGCAGAAAGGAGGCGCCCT  
GGACATAAAGAGCTTTGCAGGGGTCTTTGTATCCTGGCTGCTGGAATTGTCCTCTCCTGCTTCATAGCC

ATGCTGGAGACGTGGTGGAACAAGAGGAAAGGCTCCCGGGTTCATCAAAAGAGGATGACAAGGAAATTG  
ACCTGGAGCACCTCCATAGACGTGTAAATAGCTTGTGCACAGATGACGACAGCCCCATAAACAGTTTTTC  
CACCTCGTCAATTGATTTGACCCCTCTGGACATTGACACTTTGCCAACACGACAAGCACTGGAGCAAATC  
AGTGATTTTCAGGAACACTCATATTACCACAACAACCTTTATCCCAGAGCAGATCCAGACTCTTAGCCGCA  
CACTGTCAGCTAAAGCTGCTTCTGGTTTCACTTTTGGCAACGTGCCTGAGCACCGAACTGGCCCTTTAG  
GCACAGGGCACCTAATGGGGGCTTTTTCAGGAGTCCTATAAAAAACAATGTCATCTATTCTTATCAACCA  
ACTCCTACCCTGGGGCTCAATCTGGGTAATGATCCAGACCGAGGCACCTCCATATGAGCATCAAACAAAT  
CTCTTCACTGTTTCTTTTTTAGGACTCCCTTTCAGGAGCAACTGTAATATTGTGGGACTAACATGGAT  
GTAACGTTTAAAAAAAAGATCAGGATTATTAGTAACAATTCTAGTTTTTCTCCACCTTCTCCCTCTC  
CTCTCTCCTCTATGATTTTCTCTTTCCCCCTCCCTTCTGTACATTTTCTCCACTTTTTTTCATTAC  
TCAACTTGTTCCCAAGAAGGTAGTGTACTAGGATCCTATTAGTCTGCTTTTCATATACTGTACATCAAG  
TATAGGAAATGTGCACTGAGTATACTAAAAGTATATGCAGGATTAATTTACATAAAGGCCTCTTCTGTA  
ACATTTCTCTATTTTTTGAAATACAATTGCAATAACTTCAGTCTTTTACATTCTTCTGCTGCATCCATA  
CAATGCTCCACTGCTGTTGAGTGTCTTTAACTGTGGACCAAAGGCAACCCCTGCAGTGTTTATAAAACA  
ATTTTAAGACCATTTCAGGCCACATAAGATGAGAATGCAATTTTGTAGGATTACAAAAAAGCCATTAATAT  
GCCAGTCAAGACTACAGTTAAACTACTCTTGCACTGCAACAGTGCATATGACCTTTATGTGATTGTACA  
GTATTAAGTTTCTTATGTACAGTAACTTTATCATATGGCAGAAGCCTCTATTGTGTTAAATAAA  
TTAGTATTTTCATATATATACATATATATGCACCTATATAATGTGTATATATATAAAAAGGCAGCCATTGC  
TATTGCAATTCATTTAATAAAGCTTTAGTTTAAACAAAAGTATTGTATACAGGAACTATGTATAGTGCAG  
GGGTTCTTTTCAGTTAGAAAAGGCAGGTTGCTTTAATGTTATTCTGACTCGCATTGTTTGCCAACAGAAA  
ATATTTTATACTTTTGTTATTAAAGCATCCAGGGCAATTTAATATTTGTTCTAGATGTAACCTATTGA  
ATAGGTTTTGCATTTGTTATTCAGCAGTGTATAAAGCTAACCTTGATAATTTACTTTTAATTAATTATC  
TAAATGAAAAATGCTATTAGCTGAACCACATCCACAACAGCACATAGAGCTCTAGAAGAGTTGAAACATA  
GATCATTGAAGGTTAAAAATCCTCTTCCAAAGCAGCAAGTCAATCAATACAATAATGATATTTGGGGAGG  
GGTGGGAGCCCTTAAGAACTATTGATGTGGCCTTAAATTACTGTCAATTATTATCCTAAAGAAGAAAACA

TAATAACCATAATGGGCTCTCAACTCAACTCCCTTTTTTATTTAGTTCTATTTGGAGGAGTTATGTATTT  
TTTACATTAGTGCCAAGTATATAGAAGGATGACAGCAAAAACAGTGCCTCTTTGTGCACAATCCTTTTAA  
AGTAGCATTCTTACTTGTTAGAAATGTAGAATGAACTTTGTGTTGTAATCCTTAAATTTAAATGTGGTAAG  
TAGGAAGCAAGAACTTATTCTGTGTTTTTACGCAGCCATACACTTACTTTAATCTAACTCATTCTGTGGC  
TAGGATTGATATAGGAATCAACCTATGTGATTTGCTTTAGGAGAAATTTAAAGGTATATTCTTAAGATAT  
ATTATATTTTGATGCTAATTCTGTTCTGGGGAGCATCTTGATTGTCACTGTTTTGTACTAAATCTTCAA  
ATATTGTCTACTGTGTAAGGCAGAAAAATTTCTTATCATGCAAAAACCATTTTGTTCCAGGGTAACAAG  
TAACTAAGTGCATGCACAACCTGTTTTCCCTTGTAACATTCATGATCTCATTACAACTCTGATTTTAAA  
ACAAAAAATCTTTACAACAAGCTATATAGGGACATACCAGATGTTGCAGTGATTTTAGCTATCAACAAA  
CTGTTAACCATGTACAATATTTAAAATAGGCTTATTTTGATGTATCGCCTATTATACAAACACACAAAAC  
ATTTTTGGAGGCCTCAGTTATGAGTGACAGAGCTTCTGTGTATAATTTGTCTAAATAATTTGTCTAATA  
AAAATGTTTTCTAAAAAAAAAAAAAAAAAAAA

>NM\_004964.3 Homo sapiens histone deacetylase 1 (HDAC1), mRNA

CCCCCCCCCTGGGTCGGACGCTGAGCGGAGCCGCGGGCGGGAGGGCGGACGGACCGACTGACGGTAGG  
GACGGGAGGCGAGCAAGATGGCGCAGACGCAGGGCACCCGGAGGAAAGTCTGTTACTACTACGACGGGGA  
TGTTGGAATTACTATTATGGACAAGGCCACCCAATGAAGCCTCACCGAATCCGCATGACTCATAATTTG  
CTGCTCAACTATGGTCTCTACCGAAAAATGGAAATCTATCGCCCTCACAAAGCCAATGCTGAGGAGATGA  
CCAAGTACCACAGCGATGACTACATTAAATTCTTGCCTCCATCCGTCCAGATAACATGTCGGAGTACAG  
CAAGCAGATGCAGAGATTCAACGTTGGTGAGGACTGTCCAGTATTCGATGGCCTGTTTGAGTTCTGTCAG  
TTGTCTACTGGTGGTTCTGTGGCAAGTGCTGTGAACTTAATAAGCAGCAGACGGACATCGCTGTGAATT  
GGGCTGGGGGCCTGCACCATGCAAAGAAGTCCGAGGCATCTGGCTTCTGTTACGTCAATGATATCGTCTT  
GGCCATCCTGGAAGTCTAAAGTATCACCAGAGGGTGCTGTACATTGACATTGATATTCACCATGGTGAC

GGCGTGGAAGAGGCCTTCTACACCACGGACCGGGTCATGACTGTGTCCTTTCATAAGTATGGAGAGTACT  
TCCCAGGAACTGGGGACCTACGGGATATCGGGGCTGGCAAAGGCAAGTATTATGCTGTAACTACCCGCT  
CCGAGACGGGATTGATGACGAGTCCTATGAGGCCATTTTCAAGCCGGTCATGTCCAAAGTAATGGAGATG  
TTCCAGCCTAGTGCGGTGGTCTTACAGTGTGGCTCAGACTCCCTATCTGGGGATCGGTTAGGTTGCTTCA  
ATCTAACTATCAAAGGACACGCCAAGTGTGTGGAATTTGTCAAGAGCTTTAACCTGCCTATGCTGATGCT  
GGGAGGCGGTGGTTACACCATTGTAACGTTGCCCGGTGCTGGACATATGAGACAGCTGTGGCCCTGGAT  
ACGGAGATCCCTAATGAGCTTCCATACAATGACTACTTTGAATACTTTGGACCAGATTTCAAGCTCCACA  
TCAGTCCTTCCAATATGACTAACCAGAACACGAATGAGTACCTGGAGAAGATCAAACAGCGACTGTTTGA  
GAACCTTAGAATGCTGCCGCACGCACCTGGGGTCCAAATGCAGGCGATTCTGAGGACGCCATCCCTGAG  
GAGAGTGGCGATGAGGACGAAGACGACCCTGACAAGCGCATCTCGATCTGCTCCTCTGACAAACGAATTG  
CCTGTGAGGAAGAGTTCTCCGATTCTGAAGAGGAGGGAGAGGGGGGCCGCAAGAACTCTTCCAACTTCAA  
AAAAGCCAAGAGAGTCAAAACAGAGGATGAAAAAGAGAAAGACCCAGAGGAGAAGAAAGAAGTCACCGAA  
GAGGAGAAAACCAAGGAGGAGAAGCCAGAAGCCAAAGGGGTCAAGGAGGAGGTCAAGTTGGCCTGAATGG  
ACCTCTCCAGCTCTGGCTTCTGCTGAGTCCCTCACGTTTCTTCCCCAACCCCTCAGATTTTATATTTTC  
TATTTCTCTGTGTATTTATATAAAAATTTATTAAATATAAATATCCCCAGGGACAGAAACCAAGGCCCCG  
AGCTCAGGGCAGCTGTGCTGGGTGAGCTCTTCCAGGAGCCACCTTGCCACCCATTCTTCCCGTTCTTAAC  
TTTGAACCATAAAGGGTGCCAGGTCTGGGTGAAAGGGATACTTTTATGCAACCATAAGACAAACTCCTGA  
AATGCCAAGTGCCTGCTTAGTAGCTTTGGAAAGGTGCCCTTATTGAACATTCTAGAAGGGGTGGCTGGGT  
CTTCAAGGATCTCCTGTTTTTTTCAGGCTCCTAAAGTAACATCAGCCATTTTATAGATTGGTTCTGTTTTC  
GTACCTTCCCACTGGCCTCAAGTGAGCCAAGAAACACTGCCTGCCCTCTGTCTGTCTTCTCCTAATTCTG  
CAGGTGGAGGTTGCTAGTCTAGTTTCCTTTTGGAGATACTATTTTCATTTTGTGAGCCTCTTTGTAATA  
AAATGGTACATTTCTATA

>NM\_006044.4 Homo sapiens histone deacetylase 6 (HDAC6), transcript variant 5, mRNA

GGTTGAAGGAACGGGGCAGTCCCCTGAGGAGCGGGGCTGGTTGAAACGCTAGGGGCGGGATCTGGCGGAG  
TGGAAGAACCGCGGCAGGGGCCAAGCCTCCTCAACTATGACCTCAACCGGCCAGGATTCCACCACAACCA  
GGCAGCGAAGAAGTAGGCAGAACCCCCAGTCGCCCCCTCAGGACTCCAGTGTCACCTCGAAGCGAAATAT  
TAAAAAGGGAGCCGTTCCCCGCTCTATCCCCAATCTAGCGGAGGTAAAGAAGAAAGGCCAAAATGAAGAAG  
CTCGGCCAAGCAATGGAAGAAGACCTAATCGTGGGACTGCAAGGGATGGATCTGAACCTTGAGGCTGAAG  
CACTGGCTGGCACTGGCTTGGTGTGGATGAGCAGTTAAATGAATTCCATTGCCTCTGGGATGACAGCTT  
CCCGGAAGGCCCTGAGCGGCTCCATGCCATCAAGGAGCAACTGATCCAGGAGGGCCTCTAGATCGCTGC  
GTGTCCTTTCAGGCCCCGTTTGCTGAAAAGGAAGAGCTGATGTTGGTTCACAGCCTAGAATATATTGATC  
TGATGGAAACAACCCAGTACATGAATGAGGGAGAACTCCGTGTCCTAGCAGACACCTACGACTCAGTTTA  
TCTGCATCCGAACTCATACTCCTGTGCCTGCCTGGCCTCAGGCTCTGTCCTCAGGCTGGTGGATGCGGTC  
CTGGGGGCTGAGATCCGGAATGGCATGGCCATCATTAGGCCTCCTGGACATCACGCCCAGCACAGTCTTA  
TGGATGGCTATTGCATGTTCAACCACGTGGCTGTGGCAGCCCGCTATGCTCAACAGAAACACCGCATCCG  
GAGGGTCCTTATCGTAGATTGGGATGTGCACCACGGTCAAGGAACACAGTTCACCTTCGACCAGGACCCC  
AGTGTCTCTATTTCTCCATCCACCGCTACGAGCAGGGTAGGTTCTGGCCCCACCTGAAGGCCTCTAACT  
GGTCCACCACAGGTTTCGGCCAAGGCCAAGGATATACCATCAATGTGCCTTGAACCAGGTGGGGATGCG  
GGATGCTGACTACATTGCTGCTTTCCTGCACGTCCTGCTGCCAGTCGCCCTCGAGTTCAGCCTCAGCTG  
GTCCTGGTGGCTGCTGGATTTGATGCCCTGCAAGGGGACCCCAAGGGTGAGATGGCCGCCACTCCGGCAG  
GGTTCGCCAGCTAACCACCTGCTCATGGGTCTGGCAGGAGGCAAGCTGATCCTGTCTCTGGAGGGTGG  
CTACAACCTCCGCGCCCTGGCTGAAGGCGTCAGTGCTTCGCTCCACACCCTTCTGGGAGACCCTTGCCCC  
ATGCTGGAGTCACCTGGTGCCCCCTGCCGGAGTGCCAGGCTTCAGTTTCCTGTGCTCTGGAAGCCCTTG  
AGCCCTTCTGGGAGGTTCTTGTGAGATCAACTGAGACCGTGGAGAGGGACAACATGGAGGAGGACAATGT  
AGAGGAGAGCGAGGAGGAAGGACCCTGGGAGCCCCCTGTGCTCCCAATCCTGACATGGCCAGTGCTACAG  
TCTCGCACAGGGCTGGTCTATGACCAAAATATGATGAATCACTGCAACTTGTGGGACAGCCACCACCCTG  
AGGTACCCAGCGCATCTTGCGGATCATGTGCCGTCTGGAGGAGCTGGGCCTTGCCGGGCGCTGCCTCAC  
CCTGACACCGCGCCCTGCCACAGAGGCTGAGCTGCTCACCTGTCACAGTGCTGAGTACGTGGGTCTATCTC

CGGGCCACAGAGAAAATGAAAACCCGGGAGCTGCACCGTGAGAGTTCCAACTTTGA CTCCATCTATATCT  
GCCCCAGTACCTTCGCCTGTGCACAGCTTGCCACTGGCGCTGCCTGCCGCCTGGTGGAGGCTGTGCTCTC  
AGGAGAGGTTCTGAATGGTGCTGCTGTGGTGCGTCCCCAGGACACCACGCAGAGCAGGATGCAGCTTGC  
GGTTTTTGCTTTTTCAACTCTGTGGCTGTGGCTGCTCGCCATGCCCAGACTATCAGTGGGCATGCCCTAC  
GGATCCTGATTGTGGATTGGGATGTCCACCACGGTAATGGAACCTCAGCACATGTTTGAGGATGACCCAG  
TGTGCTATATGTGTCCCTGCACCGCTATGATCATGGCACCTTCTTCCCCATGGGGGATGAGGGTGCCAGC  
AGCCAGATCGGCCGGGCTGCGGGCACAGGCTTACCGTCAACGTGGCATGGAACGGGCCCCGCATGGGTG  
ATGCTGACTACCTAGCTGCCTGGCATCGCCTGGTGCTTCCATTGCCTACGAGTTTAACCCAGAACTGGT  
GCTGGTCTCAGCTGGCTTTGATGCTGCACGGGGGGATCCGCTGGGGGGCTGCCAGGTGTCACCTGAGGGT  
TATGCCACCTCACCCACCTGCTGATGGGCCTTGCCAGTGGCCGATTATCCTTATCCTAGAGGGTGGCT  
ATAACCTGACATCCATCTCAGAGTCCATGGCTGCCTGCACTCGCTCCCTCCTTGGAGACCCACCACCCCT  
GCTGACCCTGCCACGGCCCCCACTATCAGGGGCCCTGGCCTCAATCACTGAGACCATCCAAGTCCATCGC  
AGATACTGGCGCAGCTTACGGGTCATGAAGGTAGAAGACAGAGAAGGACCCTCCAGTTCTAAGTTGGTCA  
CCAAGAAGGCACCCCAACCAGCCAAACCTAGGTTAGCTGAGCGGATGACCACACGAGAAAAGAAGTTCT  
GGAAGCAGGCATGGGGAAAGTCACCTCGGCATCATTTGGGGAAGAGTCCACTCCAGGCCAGACTAACTCA  
GAGACAGCTGTGGTGGCCCTCACTCAGGACCAGCCCTCAGAGGCAGCCACAGGGGGAGCCACTCTGGCCC  
AGACCATTCTGAGGCAGCCATTGGGGGAGCCATGCTGGGCCAGACCACCTCAGAGGAGGCTGTGCGGGG  
AGCCACTCCGGACCAGACCACCTCAGAGGAGACTGTGGGAGGAGCCATTCTGGACCAGACCACCTCAGAG  
GATGCTGTTGGGGGAGCCACGCTGGGCCAGACTACCTCAGAGGAGGCTGTAGGAGGAGCTACACTGGCCC  
AGACCACCTCGGAGGCAGCCATGGAGGGAGCCACACTGGACCAGACTACGTCAGAGGAGGCTCCAGGGGG  
CACCGAGCTGATCCAACTCCTCTAGCCTCGAGCACAGACCAGACCCCCCAACCTCACCTGTGCAG  
GGAACTACACCCAGATATCTCCAGTACACTGATTGGGAGTCTCAGGACCTTGGAGCTAGGCAGCGAAT  
CTCAGGGGGCCTCAGAATCTCAGGCCCCAGGAGAGGAGAACCTACTAGGAGAGGCAGCTGGAGGTCAGGA  
CATGGCTGATTGATGCTGATGCAGGGATCTAGGGGCCTCACTGATCAGGCCATATTTTATGCTGTGACA  
CCTGCCCCTGGTGTCCCCATTTGGTGGCAGTATGCCCCATACCTGCAGCAGGCCTAGACGTGACCCAAC

CTTGTGGGGACTGTGGAACAATCCAAGAGAATTGGGTGTGTCTCTTGTCTATCAGGTCTACTGTGGTCG  
TTACATCAATGGCCACATGCTCCAACACCATGGAAATTCTGGACACCCGCTGGTCCTCAGCTACATCGAC  
CTGTCAGCCTGGTGTACTACTGTCAGGCCTATGTCCACCACCAGGCTCTCCTAGATGTGAAGAACATCG  
CCCACCAGAACAAGTTTGGGGAGGATATGCCCCACCCACACTAAGCCCCAGAATACGGTCCCTCTTCACC  
TTCTGAGGCCCACGATAGACCAGCTGTAGCTCATTCCAGCCTGTACCTTGGATGAGGGGTAGCCTCCAC  
TGCATCCCATCCTGAATATCCTTTGCAACTCCCCAAGAGTGCTTATTTAAGTGTTAATACTTTTAAGAGA  
ACTGCGACGATTAATTGTGGATCTCCCCCTGCCATTGCCTGCTTGAGGGGCACCACTACTCCAGCCCAG  
AAGGAAAGGGGGGCGAGCTCAGTGCCCCAAGAGGGAGCTGATATCATGAGGATAACATTGGCGGGAGGGG  
AGTTAACTGGCAGGCATGGCAAGGTTGCATATGTAATAAAGTACAAGCTGTTAAAAAA

>NM\_004712.5 Homo sapiens hepatocyte growth factor-regulated tyrosine kinase substrate (HGS), mRNA

GCGCCAGCTCGTAGCAGGGGAGCGCCCGGGCGTCGGGTTTGGGCTGGAGGTCGCCATGGGGCGAGGCAG  
CGGCACCTTCGAGCGTCTCCTAGACAAGGCGACCAGCCAGCTCCTGTTGGAGACAGATTGGGAGTCCATT  
TTGCAGATCTGCGACCTGATCCGCCAAGGGGACACACAAGCAAAATATGCTGTGAATTCCATCAAGAAGA  
AAGTCAACGACAAGAACCCACACGTCGCCTTGTATGCCCTGGAGGTCATGGAATCTGTGGTAAAGAACTG  
TGGCCAGACAGTTCATGATGAGGTGGCCAACAAGCAGACCATGGAGGAGCTGAAGGACCTGCTGAAGAGA  
CAAGTGGAGGTAAACGTCCGTAACAAGATCCTGTACCTGATCCAGGCCTGGGCGCATGCCTTCCGGAACG  
AGCCCAAGTACAAGGTGGTCCAGGACACCTACCAGATCATGAAGGTGGAGGGGCACGTCTTTCAGAATT  
CAAAGAGAGCGATGCCATGTTTGCTGCCGAGAGAGCCCCAGACTGGGTGGACGCTGAGGAATGCCACCGC  
TGCAGGGTGCAGTTCGGGGTGATGACCCGTAAGCACCCTGCCGGGCGTGTGGGCAGATATTCTGTGGAA  
AGTGTTCTTCCAAGTACTCCACCATCCCCAAGTTTGGCATCGAGAAGGAGGTGCGCGTGTGTGAGCCCTG  
CTACGAGCAGCTGAACAGGAAAGCGGAGGGGAAAGGCCACTTCCACCACTGAGCTGCCCCCGAGTACCTG

ACCAGCCCCCTGTCTCAGCAGTCCCAGCTGCCCCCAAGAGGGACGAGACGGCCCTGCAGGAGGAGGAGG  
AGCTGCAGCTGGCCCTGGCGCTGTCACAGTCAGAGGCGGAGGAGAAGGAGAGGCTGAGACAGAAGTCCAC  
GTACACTTCGTACCCCAAGGCGGAGCCCATGCCCTCGGCCTCCTCAGCGCCCCCGCCAGCAGCCTGTAC  
TCTTCACCTGTGAACTCGTCGGCGCCTCTGGCTGAGGACATCGACCCTGAGCTCGCACGGTATCTCAACC  
GGAATACTGGGAGAAGAAGCAGGAGGAGGCTCGCAAGAGCCCCACGCCATCTGCGCCCGTGCCCTGAC  
GGAGCCGGCTGCACAGCCTGGGGAAGGGCACGCAGCCCCACCAACGTGGTGGAGAACCCCTCCCGGAG  
ACAGACTCTCAGCCCATTCTCCCTCTGGTGGCCCCTTTAGTGAGCCACAGTTCCACAATGGCGAGTCTG  
AGGAGAGCCACGAGCAGTTCCTGAAGGCGCTGCAGAACGCCGTCACCACCTTCGTGAACCGCATGAAGAG  
TAACCACATGCGGGGCCGAGCATACCAATGACTCGGCCGTGCTCTACTCTTCCAGTCCATCAACGGC  
ATGCACCCGCAGCTGCTGGAGCTGCTCAACCAGCTGGACGAGCGCAGGCTGTACTATGAGGGGCTGCAGG  
ACAAGCTGGCACAGATCCGCGATGCCCCGGGGGCGCTGAGTGCCCTGCGCGAAGAGCACCGGGAGAAGCT  
TCGCCGGGCAGCCGAGGAGGCAGAGCGCCAGCGCCAGATCCAGCTGGCCCAGAAGCTGGAGATAATGCGG  
CAGAAGAAGCAGGAGTACCTGGAGGTGCAGAGGCAGCTGGCCATCCAGCGCCTGCAGGAGCAGGAGAAGG  
AGCGGCAGATGCGGCTGGAGCAGCAGAAGCAGACGGTCCAGATGCGCGCGCAGATGCCCCGCTTCCCCCT  
GCCCTACGCCAGCTCCAGGCCATGCCCGCAGCCGGAGGTGTGCTCTACCAGCCCTCGGGACCAGCCAGC  
TTCCCCAGCACCTTCAGCCCTGCCGGCTCGGTGGAGGGCTCCCCAATGCACGGCGTGTACATGAGCCAGC  
CGGCCCCTGCCGCTGGCCCCTACCCAGCATGCCAGCACTGCGGCTGATCCAGCATGGTGAGTGCCTA  
CATGTACCCAGCAGGGGCCACTGGGGCGCAGGCGGCCCCCAGGCCAGGCCGGACCCACCGCCAGCCCC  
GCTTACTCATCCTACCAGCCTACTCCCACAGCGGGCTACCAGAACGTGGCCTCCCAGGCCCCACAGAGCC  
TCCCGGCCATCTCTCAGCCTCCGAGTCCAGCACCATGGGCTACATGGGGAGCCAGTCAGTCTCCATGGG  
CTACCAGCCTTACAACATGCAGAATCTCATGACCACCCTCCAAGCCAGGATGCGTCTCTGCCACCCAG  
CAGCCCTACATCGCGGGGCAGCAGCCCATGTACCAGCAGATGGCACCCCTCTGGCGGTCCCCCCCAGCAGC  
AGCCCCCGTGGCCCAGCAACCGCAGGCACAGGGGGCCGGGCACAGGGCAGCGAGGCCAGCTCATTTTC  
ATTCGACTGACCCAGGCCATGCTCACGTCCGGAGTAACACTACATACAGTTCACCTGAAACGCCTCGTCT  
CTAACTGCCGTGTCCTGCCTCCCTGTCTCTACTGCCGGTAGTGTCCCTTCTCTGCGAGTGAGGGGGGG

CCTTCACCCCAAGCCCACCTCCCTTGCTCCTCAGCCTACTGCAGTCCCTGAGTTAGTCTCTGCTTTCTTTC  
CCCAGGGCTGGGCCATGGGGAGGGAAGGACTTTCTCCAGGGGAAGCCCCAGCCCTGTGGGTCATGGTC  
TGTGAGAGGTGGCAGGAATGGGGACCCTCACCCCCAAGCAGCCTGTGCCCTCTGGCCGCACTGTGAGCT  
GGCTGTGGTGTCTGGGTGTGGCCTGGGGCTCCCTCTGCAGGGGCCTCTCTCGGCAGCCACAGCCAAGGGT  
GGAGGCTTCAGGTCTCCAGCTTCTCTGCTTCTCAGCTGCCATCTCCAGTGCCCCAGAATGGTACAGCGAT  
AATAAAATGTATTTTCAGAAAGCA

>NM\_001530.4 Homo sapiens hypoxia inducible factor 1 subunit alpha (HIF1A), transcript variant 1,  
mRNA

AGTGACAGTGCTGCCTCGTCTGAGGGGACAGGAGGATCACCTCTTCGTCGCTTCGGCCAGTGTGTCCG  
GCTGGGGCCCTGACAAGCCACCTGAGGAGAGGCTCGGAGCCGGGGCCCGACCCGGCGATTGCCGCCCGCT  
TCTCTCTAGTCTCACGAGGGGTTTCCCGCCTCGCACCCCCACCTCTGGACTTGCCTTTCCTTCTCTCTC  
CGCGTGTGGAGGGAGCCAGCGCTTAGGCCGGAGCGAGCCTGGGGGCCCGCCGCGTGAAGACATCGCGGG  
GACCGATTACCATGGAGGGCGCCGGCGGCGGAACGACAAGAAAAAGATAAGTTCTGAACGTCGAAAAG  
AAAAGTCTCGAGATGCAGCCAGATCTCGGCGAAGTAAAGAATCTGAAGTTTTTTATGAGCTTGCTCATCA  
GTTGCCACTTCCACATAATGTGAGTTCGCATCTTGATAAGGCCTCTGTGATGAGGCTTACCATCAGCTAT  
TTGCGTGTGAGGAACTTCTGGATGCTGGTGATTGGATATTGAAGATGACATGAAAGCACAGATGAATT  
GCTTTTATTTGAAAGCCTTGGATGGTTTTGTTATGGTTCTCACAGATGATGGTGACATGATTTACATTC  
TGATAATGTGAACAAATACATGGGATTAAGTCAAGTTGAACTAACTGGACACAGTGTGTTTGATTTTACT  
CATCCATGTGACCATGAGGAAATGAGAGAAATGCTTACACACAGAAATGGCCTTGTGAAAAAGGGTAAAG  
AACAAAACACACAGCGAAGCTTTTTTCTCAGAATGAAGTGACCCTAACTAGCCGAGGAAGAACTATGAA  
CATAAAGTCTGCAACATGGAAGGTATTGCACTGCACAGGCCACATTCACGTATATGATACCAACAGTAAC  
CAACCTCAGTGTGGGTATAAGAAACACCTATGACCTGCTTGGTGCTGATTGTGAACCCATTCCTCACC

CATCAAATATTGAAATTCCTTTAGATAGCAAGACTTTCTCAGTCGACACAGCCTGGATATGAAATTTTC  
TTATTGTGATGAAAGAATTACCGAATTGATGGGATATGAGCCAGAAGAACTTTTAGGCCGCTCAATTTAT  
GAATATTATCATGCTTTGGACTCTGATCATCTGACCAAACTCATCATGATATGTTTACTAAAGGACAAG  
TCACCACAGGACAGTACAGGATGCTTGCCAAAAGAGGTGGATATGTCTGGGTTGAACTCAAGCAACTGT  
CATATATAACACCAAGAATTCTCAACCACAGTGCATTGTATGTGTGAATTACGTTGTGAGTGGTATTATT  
CAGCACGACTTGATTTTCTCCCTTCAACAAACAGAATGTGTCCTTAAACCGTTGAATCTTCAGATATGA  
AAATGACTCAGCTATTACCAAAGTTGAATCAGAAGATACAAGTAGCCTCTTGACAACTTAAGAAGGA  
ACCTGATGCTTTAACTTTGCTGGCCCCAGCCGCTGGAGACACAATCATATCTTTAGATTTTGGCAGCAAC  
GACACAGAACTGATGACCAGCAACTTGAGGAAGTACCATTATATAATGATGTAATGCTCCCCTCACCCA  
ACGAAAAATTACAGAATATAAATTTGGCAATGTCTCCATTACCCACCGCTGAAACGCCAAAGCCACTTCG  
AAGTAGTGCTGACCCTGCACTCAATCAAGAAGTTGCATTAATAATTAGAACCAAATCCAGAGTCACTGGAA  
CTTTCTTTTACCATGCCCCAGATTCAGGATCAGACACCTAGTCCTTCCGATGGAAGCACTAGACAAAGTT  
CACCTGAGCCTAATAGTCCCAGTGAATATTGTTTTATGTGGATAGTGATATGGTCAATGAATTCAAGTT  
GGAATTGGTAGAAAACTTTTTGCTGAAGACACAGAAGCAAAGAACCCATTTTCTACTCAGGACACAGAT  
TTAGACTTGGAGATGTTAGCTCCCTATATCCCAATGGATGATGACTTCCAGTTACGTTCTTCGATCAGT  
TGTCACCATTAGAAAGCAGTTCCGCAAGCCCTGAAAGCGCAAGTCCTCAAAGCACAGTTACAGTATTCCA  
GCAGACTCAAATACAAGAACCTACTGCTAATGCCACCACTACCACTGCCACCACTGATGAATTAAAAACA  
GTGACAAAAGACCGTATGGAAGACATTAATAATTGATTGCATCTCCATCTCCTACCCACATACATAAAG  
AAACTACTAGTGCCACATCATCACCATATAGAGATACTCAAAGTCGGACAGCCTCACCAAACAGAGCAGG  
AAAAGGAGTCATAGAACAGACAGAAAAATCTCATCCAAGAAGCCCTAACGTGTTATCTGTGCTTTGAGT  
CAAAGAACTACAGTTCCTGAGGAAGAACTAAATCCAAAGATACTAGCTTTGCAGAATGCTCAGAGAAAAGC  
GAAAAATGGAACATGATGGTTCACCTTTTCAAGCAGTAGGAATTGGAACATTATTACAGCAGCCAGACGA  
TCATGCAGCTACTACATCACTTTCTTGAAACGTGTAAAAGGATGCAAATCTAGTGAACAGAATGGAATG  
GAGCAAAAGACAATTATTTTAATACCCTCTGATTTAGCATGTAGACTGCTGGGGCAATCAATGGATGAAA  
GTGGATTACCACAGCTGACCAGTTATGATTGTGAAGTTAATGCTCCTATACAAGGCAGCAGAAACCTACT

GCAGGGTGAAGAATTACTCAGAGCTTTGGATCAAGTAACTGAGCTTTTTCTTAATTTATTCTTTTTT  
TGGACACTGGTGGCTCATTACCTAAAGCAGTCTATTTATATTTCTACATCTAATTTAGAACCTGGCT  
ACAATACTGCACAACTTGGTTAGTTCAATTTTGATCCCCTTCTACTTAATTTACATTAATGCTCTTTT  
TTAGTATGTTCTTTAATGCTGGATCACAGACAGCTCATTTTCTCAGTTTTTTGGTATTTAAACCATTGCA  
TTGCAGTAGCATCATTTTAAAAAATGCACCTTTTTATTTATTTATTTTGGCTAGGGAGTTTATCCCTTT  
TTCGAATTATTTTAAAGAAGATGCCAATATAATTTTGTAAAGAAGGCAGTAACCTTTCATCATGATCATA  
GGCAGTTGAAAAATTTTACACCTTTTTTTCACATTTTACATAAATAATAATGCTTGGCAGCAGTACG  
TGGTAGCCACAATTGCACAATATATTTCTTAAAAAATACCAGCAGTTACTCATGGAATATATTCTGCGT  
TTATAAACTAGTTTTTAAGAAGAAATTTTTTGGCCTATGAAATTGTTAAACCTGGAACATGACATTG  
TTAATCATATAATAATGATTCTTAAATGCTGTATGGTTTATTATTTAAATGGGTAAAGCCATTTACATAA  
TATAGAAAGATATGCATATATCTAGAAGGTATGTGGCATTATTTGGATAAAATTCTCAATTCAGAGAAA  
TCATCTGATGTTTCTATAGTCACTTTGCCAGCTCAAAGAAAACAATACCCTATGTAGTTGTGGAAGTTT  
ATGCTAATATTGTGTAAGTATTAACCTAAATGTTCTGCCTACCCTGTTGGTATAAAGATATTTTGA  
GCAGACTGTAAACAAGAAAAAAAAAATCATGCATTCTTAGCAAAATTGCCTAGTATGTTAATTTGCTCAA  
AATACAATGTTTGATTTTATGCACTTTGTCGCTATTAACATCCTTTTTTTCATGTAGATTTCAATAATTG  
AGTAATTTTAGAAGCATTATTTAGGAATATATAGTTGTCACAGTAAATATCTTGTTTTTCTATGTACA  
TTGTACAAATTTTTCATTCTTTTGTCTTTGTGGTTGGATCTAACCTAACTGTATTGTTTTGTACAT  
CAAATAAACATCTTCTGTGGACCAGG

>NM\_007355.4 Homo sapiens heat shock protein 90 alpha family class B member 1 (HSP90AB1),  
transcript variant 2, mRNA

CTCTCGAGTCACTCCGGCGCAGTGTGGGACTGTCTGGGTATCGGAAAGCAAGCCTACGTTGCTCACTAT  
TACGTATAATCCTTTTCTTTCAAGATGCCTGAGGAAGTGCACCATGGAGAGGAGGAGGTGGAGACTTTT  
GCCTTTCAGGCAGAAATTGCCCACTCATGTCCCTCATCATCAATACCTTCTATTCCAACAAGGAGATTT

TCCTTCGGGAGTTGATCTCTAATGCTTCTGATGCCTTGGACAAGATTCGCTATGAGAGCCTGACAGACCC  
TTCGAAGTTGGACAGTGGTAAAGAGCTGAAAATTGACATCATCCCCAACCTCAGGAACGTACCCTGACT  
TTGGTAGACACAGGCATTGGCATGACCAAAGCTGATCTCATAAATAATTTGGGAACCATTGCCAAGTCTG  
GTACTAAAGCATTTCATGGAGGCTCTTCAGGCTGGTGCAGACATCTCCATGATTGGGCAGTTTGGTGTGG  
CTTTTATTCTGCCTACTTGGTGGCAGAGAAAGTGGTTGTGATCACAAAGCACACGATGATGAACAGTAT  
GCTTGGGAGTCTTCTGCTGGAGGTTCTTCACTGTGCGTGCTGACCATGGTGAGCCCATTGGCAGGGGTA  
CCAAAGTGATCCTCCATCTTAAAGAAGATCAGACAGAGTACCTAGAAGAGAGGCGGGTCAAAGAAGTAGT  
GAAGAAGCATTCTCAGTTCATAGGCTATCCCATCACCTTTATTTGGAGAAGGAACGAGAGAAGGAAATT  
AGTGATGATGAGGCAGAGGAAGAGAAAGGTGAGAAAGAAGAGGAAGATAAAGATGATGAAGAAAAACCCA  
AGATCGAAGATGTGGGTTCAGATGAGGAGGATGACAGCGGTAAGGATAAGAAGAAGAAAATAAGAAGAT  
CAAAGAGAAATACATTGATCAGGAAGAACTAAACAAGACCAAGCCTATTTGGACCAGAAACCCTGATGAC  
ATCACCCAAGAGGAGTATGGAGAATTCTACAAGAGCCTCACTAATGACTGGGAAGACCACTTGGCAGTCA  
AGCACTTTTCTGTAGAAGGTCAGTTGGAATTCAGGGCATTGCTATTTATTCCTCGTCGGGCTCCCTTTGA  
CCTTTTTGAGAACAAGAAGAAAAAGAACAACATCAAACCTCTATGTCCGCCGTGTGTTTCATCATGGACAGC  
TGTGATGAGTTGATACCAGAGTATCTCAATTTATCCGTGGTGTGGTTGACTCTGAGGATCTGCCCCTGA  
ACATCTCCCGAGAAATGCTCCAGCAGAGCAAAATCTTGAAAGTCATTCGCAAAAACATTGTGAAGAAGTG  
CCTTGAGCTCTTCTCTGAGCTGGCAGAAGACAAGGAGAATTACAAGAAATTCTATGAGGCATTCTCTAAA  
AATCTCAAGCTTGAATCCACGAAGACTCCACTAACCGCCGCCGCTGTCTGAGCTGCTGCGCTATCATA  
CCTCCAGTCTGGAGATGAGATGACATCTCTGTGAGAGTATGTTTCTCGCATGAAGGAGACACAGAAGTC  
CATCTATTACATCACTGGTGAGAGCAAAGAGCAGGTGGCCAACTCAGCTTTTGTGGAGCGAGTGCGGAAA  
CGGGGCTTCGAGGTGGTATATATGACCGAGCCCATTGACGAGTACTGTGTGCAGCAGCTCAAGGAATTTG  
ATGGGAAGAGCCTGGTCTCAGTTACCAAGGAGGGTCTGGAGCTGCCTGAGGATGAGGAGGAGAAGAAGAA  
GATGGAAGAGAGCAAGGCAAAGTTTGAGAACCTCTGCAAGCTCATGAAAGAAATCTTAGATAAGAAGGTT  
GAGAAGGTGACAATCTCCAATAGACTTGTGTCTTCACCTTGCTGCATTGTGACCAGCACCTACGGCTGGA  
CAGCCAATATGGAGCGGATCATGAAAGCCCAGGCACTTCGGGACAACCTCCACCATGGGCTATATGATGGC

CAAAAAGCACCTGGAGATCAACCCTGACCACCCCATTGTGGAGACGCTGCGGCAGAAGGCTGAGGCCGAC  
AAGAATGATAAGGCAGTTAAGGACCTGGTGGTGCTGCTGTTGAAACCGCCCTGCTATCTTCTGGCTTTT  
CCCTTGAGGATCCCCAGACCCACTCCAACCGCATCTATCGCATGATCAAGCTAGGTCTAGGTATTGATGA  
AGATGAAGTGGCAGCAGAGGAACCCAATGCTGCAGTTCCTGATGAGATCCCCCTCTCGAGGGCGATGAG  
GATGCGTCTCGCATGGAAGAAGTCGATTAGGTAGGAGTTCATAGTTGGAAAATTGTGCCCTTGATAG  
TGTCCCATGGGCTCCCACTGCAGCCTCGAGTGCCCCTGTCCACCTGGCTCCCCCTGCTGGTGTCTAGT  
GTTTTTTTCCCTCTCCTGTCTTGTGTTGAAGGCAGTAACTAAGGGTGTCAAGCCCCATTCCCTCTCTA  
CTCTTGACAGCAGGATTGGATGTTGTGTATTGTGGTTTATTTTATTTTCTTCATTTTGTCTGAAATTAA  
AGTATGCAAATAAAGAATATGCCGTTTTTATACA

>NM\_005347.5 Homo sapiens heat shock protein family A (Hsp70) member 5 (HSPA5), mRNA

GACGCCGGCCAAGACAGCACAGACAGATTGACCTATTGGGGTGTTTCGCGAGTGTGAGAGGGAAGCGCCG  
CGGCCTGTATTCTAGACCTGCCCTTCGCCTGGTTCGTGGCGCCTTGACCCCGGGCCCCCTGCCGCCTG  
CAAGTCGGAAATTGCGCTGTGCTCCTGTGCTACGGCCTGTGGCTGGACTGCCTGCTGCTGCCAACTGGC  
TGGCAAGATGAAGCTCTCCCTGGTGGCCGCGATGCTGCTGCTGCTCAGCGCGGCGCGGGCCGAGGAGGAG  
GACAAGAAGGAGGACGTGGGCACGGTGGTCGGCATCGACCTGGGGACCACCTACTCCTGCGTCGGCGTGT  
TCAAGAACGGCCGCGTGGAGATCATCGCCAACGATCAGGGCAACCGCATCACGCCGTCTATGTCGCCTT  
CACTCCTGAAGGGGAACGTCTGATTGGCGATGCCGCCAAGAACCAGCTCACCTCCAACCCCGAGAACACG  
GTCTTTGACGCCAAGCGGCTCATCGGCCGCACGTGGAATGACCCGTCTGTGCAGCAGGACATCAAGTTCT  
TGCCGTTCAAGGTGGTTGAAAAGAAAATAAACCATACATTCAAGTTGATATTGGAGGTGGGCAAACAAA  
GACATTTGCTCCTGAAGAAATTTCTGCCATGGTTCTCACTAAAATGAAAGAAACCGCTGAGGCTTATTTG  
GGAAAGAAGGTTACCCATGCAGTTGTTACTGTACCAGCCTATTTTAATGATGCCCAACGCCAAGCAACCA  
AAGACGCTGGAACATATTGCTGGCCTAAATGTTATGAGGATCATCAACGAGCCTACGGCAGCTGCTATTGC

TTATGGCCTGGATAAGAGGGAGGGGGAGAAGAACATCCTGGTGTGTTGACCTGGGTGGCGGAACCTTCGAT  
GTGTCTCTTCTCACCATTGACAATGGTGTCTTCGAAGTTGTGGCCACTAATGGAGATACTCATCTGGGTG  
GAGAAGACTTTGACCAGCGTGTGCATGGAACACTTCATCAAAGTGTACAAAAAGAAGACGGGCAAAGATGT  
CAGGAAAGACAATAGAGCTGTGCAGAACTCCGGCGCGAGGTAGAAAAGGCCAAACGGGGCCTGTCTTCT  
CAGCATCAAGCAAGAATTGAAATTGAGTCCTTCTATGAAGGAGAAGACTTTTCTGAGACCCTGACTCGGG  
CCAAATTTGAAGAGCTCAACATGGATCTGTTCCGGTCTACTATGAAGCCCGTCCAGAAAGTGTGGAAGA  
TTCTGATTTGAAGAAGTCTGATATTGATGAAATTGTTCTTGTGGTGGCTCGACTCGAATTCAAAGATT  
CAGCAACTGGTTAAAGAGTTCTTCAATGGCAAGGAACCATCCCGTGGCATAAACCCAGATGAAGCTGTAG  
CGTATGGTGCTGCTGTCCAGGCTGGTGTGCTCTCTGGTGATCAAGATACAGGTGACCTGGTACTGCTTGA  
TGTATGTCCCCTTACACTTGGTATTGAAACTGTGGGAGGTGTCATGACCAAAGTATTCCAAGGAACACA  
GTGGTGCCTACCAAGAAGTCTCAGATCTTTTCTACAGCTTCTGATAATCAACCAACTGTTACAATCAAGG  
TCTATGAAGGTGAAAGACCCCTGACAAAAGACAATCATCTTCTGGGTACATTTGATCTGACTGGAATTCC  
TCCTGCTCCTCGTGGGGTCCACAGATTGAAGTCACCTTTGAGATAGATGTGAATGGTATTCTTCGAGTG  
ACAGCTGAAGACAAGGGTACAGGGAACAAAAATAAGATCACAATCACCAATGACCAGAATCGCCTGACAC  
CTGAAGAAATCGAAAGGATGGTTAATGATGCTGAGAAGTTTGCTGAGGAAGACAAAAAGCTCAAGGAGCG  
CATTGATACTAGAAATGAGTTGGAAAGCTATGCCTATTCTCTAAAGAATCAGATTGGAGATAAAGAAAAG  
CTGGGAGGTAAACTTTCTCTGAAGATAAGGAGACCATGGAAAAAGCTGTAGAAGAAAAGATTGAATGGC  
TGGAAGCCACCAAGATGCTGACATTGAAGACTTCAAAGCTAAGAAGAAGGAACTGGAAGAAATTGTTCA  
ACCAATTATCAGCAAAGTCTATGGAAGTGCAGGCCCTCCCCCAACTGGTGAAGAGGATACAGCAGAAAAA  
GATGAGTTGTAGACACTGATCTGCTAGTGCTGTAATATTGTAAATACTGGACTCAGGAACCTTTGTTAGG  
AAAAAATTGAAAGAACTTAAGTCTCGAATGTAATTGGAATCTTCACCTCAGAGTGGAGTTGAAACTGCTA  
TAGCCTAAGCGGCTGTTTACTGCTTTTCATTAGCAGTTGCTCACATGTCTTTGGGTGGGGGGGAGAAGAA  
GAATTGGCCATCTTAAAAAGCGGGTAAAAAACCTGGGTAGGGTGTGTGTTACCTTCAAATGTTCTAT  
TTAACAACTGGGTCTGTGCATCTGGTGTAGGAAGTTTTTCTACCATAAGTGACACCAATAAATGTTTG  
TTATTTACTGGTCTAATGTTTGTGAGAAGCTTCTAATTAGATCAATTACTTATTTAGGAAATTTAAG

ACTAGATACTCGTGTGTGGGGTGAGGGGAGGGAGTATTTGGTATGTTGGGATAAGGAAACACTTCTATTT  
AATGCTTCCAGGGATTTTTTTTTTTTTTTTAAACCCTCCTGGGCCCAAGTGATCCTTCCACCTCAGTCTC  
CCAGCTAATTGAGACCACAGGCTTGTTACCACCATGCTCGGCTTTTGCATTAATCTAAGAAAAGGGGAGA  
GAAGTTAATCCACATCTTTACTCAGGCAAGGGGCATTTACAGTGCCCAAGAGTGGGGTTTTCTTGAACA  
TACTTGGTTTCTATTTCCCCTTATCTTTCTAAACTGCCTTTCTGGTGGCTTTTTTAAAATTATTACT  
AATGATGCTTTTATAGCTGCTTGGATTCTCTGAGAAATGATGGGGAGTGAGTGATCACTGGTATTAACCT  
TATACACTTGGATTTTCAATTTGTAACCTTAGGATGTAAAGGTATATTGTGAACCCTAGCTGTGTGAGAATC  
TCCATCCCTGAAATTTCTCATTAGTGGTACTGGGGTGGGATCTTGGATGGTGACATTGAAACTACACTAA  
ATCCCCTCACTATGAATGGGTTGTTAAAGGCAATGGTTTGTGTCAAACTGGTTTAGGATTACTTAGATT  
GTGTTCTGAAGAAAAGAGTCCAGGTAAATGGTATGATCAATAAAGGACAGGCTGGTGCTAACATAAAAT  
CCAATATTGTAATCCTAGCACTTTGGGAGGCCAAGGCGGGTGGATCACAAGGTCAAGAGATAGAGACCAT  
CTTTGCCAACATGGTGAAACTCCATCTCTACTGAAAATACAAAAATTAGCTGGGCGTGGTAGTGCAAGCT  
GAAGGCTGAGGCAGGAGAATCACTCGAACCCGGGAGGCAGAGGTTGCAGTGAGCCGAGATCACACCACTG  
TACTCCAGCCCGGCACTCCAGCCTGGCGACAAGAGTGAGACTCCACCTCAAAAAAAAAAAAAAGAATCCA  
ATACTGCCCAAGGATAGGTATTTTATAGATGGGCAACTGGCTGAAAGGTTAATTCTCTAGGGCTAGTAGA  
ACTGGATCCCAACACCAAACCTCTTAATTAGACCTAGGCCTCAGCTGCACTGCCCAGAAAGCATTTGGGCA  
GACCCTGAGCAGAATACTGGTCTCAGGCCAAGCCCAATACAGCCATTAAAGATGACCTACAGTGCTGTGT  
ACCCTGGGGCAATAGGGTTAAATGGTAGTTAGCAACTAGGGCTAGTCTTCCCTTACCTCAAAGGCTCTCA  
CTACCGTGGACCACCTAGTCTGTAACCTTTTCTGAGGAGCTGTTACTGAATATTAAGATAGACTTCA

A>NM\_006597.6 Homo sapiens heat shock protein family A (Hsp70) member 8 (HSPA8), transcript variant 1, mRNA

CTCATTGAACTCGCCTGCAGCTCTTGGGTTTTTTGTGGCTTCCTTCGTTATTGGAGCCAGGCCTACACCC

CAGCAACCATGTCCAAGGGACCTGCAGTTGGTATTGATCTTGGCACCACCTACTCTTGTGTGGGTGTTTT  
CCAGCACGGAAAAGTCGAGATAATTGCCAATGATCAGGGAAACCGAACCCTCCAAGCTATGTCGCCTTT  
ACGGACACTGAACGGTTGATCGGTGATGCCGCAAAGAATCAAGTTGCAATGAACCCACCAACACAGTTT  
TTGATGCCAAACGTCTGATTGGACGCAGATTTGATGATGCTGTTGTCCAGTCTGATATGAAACATTGGCC  
CTTTATGGTGGTGAATGATGCTGGCAGGCCCAAGGTCCAAGTAGAATACAAGGGAGAGACCAAAAGCTTC  
TATCCAGAGGAGGTGTCTTCTATGGTTCTGACAAAGATGAAGGAAATTGCAGAAGCCTACCTTGGGAAGA  
CTGTTACCAATGCTGTGGTCACAGTGCCAGCTTACTTTAATGACTCTCAGCGTCAGGCTACCAAAGATGC  
TGGAACCTATTGCTGGTCTCAATGTACTTAGAATTATTAATGAGCCAACCTGCTGCTGCTATTGCTTACGGC  
TTAGACAAAAAGGTTGGAGCAGAAAGAAACGTGCTCATCTTTGACCTGGGAGGTGGCACTTTTGATGTGT  
CAATCCTCACTATTGAGGATGGAATCTTTGAGGTCAAGTCTACAGCTGGAGACACCCACTTGGGTGGAGA  
AGATTTTGACAACCGAATGGTCAACCATTTTATTGCTGAGTTTAAGCGCAAGCATAAGAAGGACATCAGT  
GAGAACAAGAGAGCTGTAAGACGCCTCCGTAAGTCTGTTGTAACGTGCTAAGCGTACCCTCTCTTCCAGCA  
CCCAGGCCAGTATTGAGATCGATTCTCTCTATGAAGGAATCGACTTCTATACCTCCATTACCCGTGCCCCG  
ATTTGAAGAACTGAATGCTGACCTGTTCCGTGGCACCCCTGGACCCAGTAGAGAAAGCCCTTCGAGATGCC  
AACTAGACAAGTCACAGATTCATGATATTGTCCTGGTTGGTGGTTCTACTCGTATCCCCAAGATTCAGA  
AGCTTCTCCAAGACTTCTTCAATGGAAGAACTGAATAAGAGCATCAACCCTGATGAAGCTGTTGCTTA  
TGGTGCAGCTGTCCAGGCAGCCATCTTGTCTGGAGACAAGTCTGAGAATGTTCAAGATTTGCTGCTCTTG  
GATGTCACTCCTCTTTCCCTTGGTATTGAAACTGCTGGTGGAGTCATGACTGTCCTCATCAAGCGTAATA  
CCACCATTCTACCAAGCAGACACAGACCTTCACTACCTATTCTGACAACCAGCCTGGTGTGCTTATTCA  
GGTTTATGAAGGCGAGCGTGCCATGACAAAGGATAACAACCTGCTTGGCAAGTTTGAACCTCACAGGCATA  
CCTCCTGCACCCCGAGGTGTTCTCAGATTGAAGTCACTTTTGACATTGATGCCAATGGTATACTCAATG  
TCTCTGCTGTGGACAAGAGTACGGGAAAAGAGAACAAGATTACTATCACTAATGACAAGGGCCGTTTGAG  
CAAGGAAGACATTGAACGTATGGTCCAGGAAGCTGAGAAGTACAAAGCTGAAGATGAGAAGCAGAGGGAC  
AAGGTGTCATCCAAGAATTCATTGAGTCCTATGCCTTCAACATGAAAGCAACTGTTGAAGATGAGAAAC  
TTCAAGGCAAGATTAACGATGAGGACAAACAGAAGATTCTGGACAAGTGTAATGAAATTATCAACTGGCT

TGATAAGAATCAGACTGCTGAGAAGGAAGAATTTGAACATCAACAGAAAGAGCTGGAGAAAAGTTTGCAAC  
CCCATCATCACCAAGCTGTACCAGAGTGCAGGAGGCATGCCAGGAGGAATGCCTGGGGGATTTCTGGTG  
GTGGAGCTCCTCCCTCTGGTGGTGCTTCCTCAGGGCCCACCATTGAAGAGGTTGATTAAGCCAACCAAGT  
GTAGATGTAGCATTGTTCCACACATTTAAACATTTGAAGGACCTAAATTCGTAGCAAATTCTGTGGCAG  
TTTTAAAAAGTTAAGCTGCTATAGTAAGTTACTGGGCATTCTCAATACTTGAATATGGAACATATGCACA  
GGGGAAGGAAATAACATTGCACTTTATAAACACTGTATTGTAAGTGGAAAATGCAATGTCTTAAATAAAA  
CTATTTAAAATTGGCACCATACAA

>NM\_014365.3 Homo sapiens heat shock protein family B (small) member 8 (HSPB8), mRNA

AGAAGAAGTTTCTAGGCGCGCGTGCCCTGGGTTTATTAAGCTCCTGGCTCCGCTCTAGACCTCAGCGGT  
CTGGCTGCCAGCCTGGGCAGCCTGGGAAGCCTGGGAGGACGGTGGCTTGCCGGTCTGTCGTGAGGCAGTG  
CGGACGGGGACCCTCTGGGATTCTGCTGGATCTGCCCCGGGGGTTACCTTTGGGGGCTGGGACCCAGTC  
GAGGGGACACAACCGTCCCTGGCAGTGGTTGGTTCTGCTTCTCCCTGCAGAAAAGCAGCATTTTCGGAAG  
CTGAAGAATAAGCTAGCCCAGCCACACCACCTTGTTGTGTGACCTTGGGCAGGTGGTTCTGTCTCTCTGA  
GCCTCTGTTTCTCTCTGAGCTGAGCAGCCACCATGGCTGACGGTCAGATGCCCTTCTCCTGCCACTACCC  
AAGCCGCTGCGCCGAGACCCCTTCCGGGACTCTCCCTCTCCTCTCGCCTGCTGGATGATGGCTTTGGC  
ATGGACCCCTTCCCAGACGACTTGACAGCCTTGGCCCCGACTGGGCTCTGCCTCGTCTCTCCTCCGCT  
GGCCAGGCACCCTAAGGTCGGGCATGGTGCCCCGGGGCCCCACTGCCACCGCCAGGTTTGGGGTGCCTGC  
CGAGGGCAGGACCCCCCACCCTTCCCTGGGGAGCCCTGGAAAGTGTGTGTGAATGTGCACAGCTTCAAG  
CCAGAGGAGTTGATGGTGAAGACCAAAGATGGATACGTGGAGGTGTCTGGCAAACATGAAGAGAAACAGC  
AAGAAGGTGGCATTGTTTCTAAGAACTTCACAAAGAAAATCCAGCTTCTGCAGAGGTGGATCCTGTGAC  
AGTATTTGCCTCACTTTCCCAGAGGGTCTGCTGATCATCGAAGCTCCCAGGTCCCTCCTTACTCAACA

TTTGGAGAGAGCAGTTTCAACAACGAGCTTCCCCAGGACAGCCAGGAAGTCACCTGTACCTGAGATGCCA  
GTACTGGCCCATCCTTGTTTTGTCCCCAACCCCTAGGGCTTCTCTGATTCCAGGATACATTACTTTAGCTG  
AACTCAGATTTAGTGCAAGTAAATGTTAGAGGGTGCGGGGGTGAGGACTGACCACAGATTCCCTGGATA  
GTGTAGTGGTAGATTTCTCCACAGGATAGCGCAATTGGCAAATCATGCTTGGTTGTGTTAGGCCAAAATA  
CTAGTTTTGCTTTCTTTACCTTTTCTATCTTGATGAAAATGTTGCACATTCTATAGTTGCAAAACACATA  
AAAGGGGACTTAACATTTACGTTGTATCTTACTTGCAAGTGAATGCAAGGGTTACTTTTCTCTGGGGACC  
TCCCCATCACCCAGGTTCTACTCTGGGCTCCCGATTCCCATGGCTCCCAAACCATGCCGCATGGTTTG  
GTTAATGAAACCCAGTAGCTAACCCCACTGTGCTTCCACATGCCTGGCCTAAAATGGGTGATATACAGGT  
CTTATATCCCCATATGGAATTTATCCATCAACCACATAAAAAACAAACAGTGCCTTCTGCCCTCTGCCCAG  
ATGTGTCCAGCACGTTCTCAAAGTTTCCACATTAGCACTCCCTAAGGACGCTGGGAGCCTGTCAGTTTAT  
GATCTGACCTAGGTCCCCCTTTCTTCTGTCCCCTGTGTTTAAGTCGGGATTTTACAGAGGGAGCTGTC  
TCCAGACAGCTCCATCAGGAACCAAGCAAAGGCCAGATAGCCTGACAGATAGGCTAGTGGTATTGTGTAT  
ATGGGCGGGACGTGTGTGTCATTATTATTTGAGTTATGCTGTTGTTAGGGGTAAATAACAGTAAATAAT  
TAATAATAATAATAATAATAATAAAGGAGCTGACGTTCTTA

>NM\_000619.3 Homo sapiens interferon gamma (IFNG), mRNA

ACATTGTTCTGATCATCTGAAGATCAGCTATTAGAAGAGAAAGATCAGTTAAGTCCTTTGGACCTGATCA  
GCTTGATACAAGAACTACTGATTTCAACTTCTTTGGCTTAATTCTCTCGGAAACGATGAAATATACAAGT  
TATATCTTGGCTTTTCAGCTCTGCATCGTTTTGGGTTCTCTTGGCTGTTACTGCCAGGACCCATATGTAA  
AAGAAGCAGAAAACCTTAAGAAATATTTAATGCAGGTCATTCAGATGTAGCGGATAATGGAACCTTTT  
CTTAGGCATTTTGAAGAATTGGAAAGAGGAGAGTGACAGAAAAATAATGCAGAGCCAAATTGTCTCCTTT  
TACTTCAAACCTTTTAAAACTTTAAAGATGACCAGAGCATCCAAAAGAGTGTGGAGACCATCAAGGAAG  
ACATGAATGTCAAGTTTTTCAATAGCAACAAAAAGAAACGAGATGACTTCGAAAAGCTGACTAATTATTC

GGTAACTGACTTGAATGTCCAACGCAAAGCAATACATGAACTCATCCAAGTGATGGCTGAACTGTCGCCA  
GCAGCTAAACAGGGAAGCGAAAAAGGAGTCAGATGCTGTTTCGAGGTCGAAGAGCATCCCAGTAATGGT  
TGCCTGCCTGCAATATTTGAATTTTAAATCTAAATCTATTTATTAATATTTAACATTATTTATATGGGG  
AATATATTTTTAGACTCATCAATCAAATAAGTATTTATAATAGCAACTTTTGTGTAATGAAAATGAATAT  
CTATTAATATATGTATTATTTATAATTCCTATATCCTGTGACTGTCTCACTTAATCCTTTGTTTTCTGAC  
TAATTAGGCAAGGCTATGTGATTACAAGGCTTTATCTCAGGGGCCAACTAGGCAGCCAACCTAAGCAAGA  
TCCCATGGGTTGTGTGTTTATTTCACTTGATGATACAATGAACACTTATAAGTGAAGTGATACTATCCAG  
TACTGCCGGTTTGAAAATATGCCTGCAATCTGAGCCAGTGCTTTAATGGCATGTCAGACAGAACTTGAA  
TGTGTCAGGTGACCCTGATGAAAACATAGCATCTCAGGAGATTTTCATGCCTGGTGCTTCCAAATATTGTT  
GACAACTGTGACTGTACCCAAATGGAAAGTAACTCATTTGTAAAATTATCAATATCTAATATATATGAA  
TAAAGTGTAAGTTCACAACTA

>NM\_001190720.3 Homo sapiens inhibitor of nuclear factor kappa B kinase subunit beta (IKKB),  
transcript variant 2, mRNA

GTGACGTCAGAGCAGGAAGTGTTTGAGGAAGTCGCGCCGCGCTGCCCCGCGTTAAGATTCCCGCATTTTAA  
TGTTTTCAGGGGGGTGTCATAGCCCCGGGTTTGCCGCCCCAGCCCCGCCTCCCCGCCCCGGGGAGCCC  
GCCCCCTGCCCCGCGTCCCTGCCGACAGGAAACAGGTGAGCAGATTGCCATCAAGCAGTGCCGGCAGGAG  
CTCAGCCCCCGGAACCGAGAGCGGTGGTGCCTGGAGATCCAGATCATGAGAAGGCTGACCCACCCAATG  
TGGTGGCTGCCCAGATGTCCCTGAGGGGATGCAGAACTTGGCGCCCAATGACCTGCCCCTGCTGGCCAT  
GGAGTACTGCCAAGGAGGAGATCTCCGGAAGTACCTGAACCAGTTTGAGAACTGCTGTGGTCTGCGGGAA  
GGTGCCATCCTCACCTTGCTGAGTGACATTGCCTCTGCGCTTAGATACCTTCATGAAAACAGAATCATCC  
ATCGGGATCTAAAGCCAGAAAACATCGTCCTGCAGCAAGGAGAACAGAGGTTAATACACAAAATTATTGA  
CCTAGGATATGCCAAGGAGCTGGATCAGGGCAGTCTTGCACATCATTCGTGGGGACCCTGCAGTACCTG  
GCCCCAGAGCTACTGGAGCAGCAGAAGTACACAGTGACCGTCGACTACTGGAGCTTCGGCACCTGGCCT

TTGAGTGCATCACGGGCTTCCGGCCCTCCTCCCCAACTGGCAGCCCGTGCAAGTGGCATTCAAAAGTGCG  
GCAGAAGAGTGAGGTGGACATTGTTGTTAGCGAAGACTTGAATGGAACGGTGAAGTTTTCAAGCTCTTTA  
CCCTACCCCAATAATCTTAACAGTGTCTGGCTGAGCGACTGGAGAAGTGGCTGCAACTGATGCTGATGT  
GGCACCCCCGACAGAGGGGCACGGATCCCACGTATGGGCCCAATGGCTGCTTCAAGGCCCTGGATGACAT  
CTTAAACTTAAAGCTGGTTCATATCTTGAACATGGTCACGGGCACCATCCACACCTACCCTGTGACAGAG  
GATGAGAGTCTGCAGAGCTTGAAGGCCAGAATCCAACAGGACACGGGCATCCCAGAGGAGGACCAGGAGC  
TGCTGCAGGAAGCGGGCCTGGCGTTGATCCCCGATAAGCCTGCCACTCAGTGTATTTGAGACGGCAAGTT  
AAATGAGGGCCACACATTGGACATGGATCTTGTTTTCTCTTTGACAACAGTAAAATCACCTATGAGACT  
CAGATCTCCCCACGGCCCCAACCTGAAAGTGTGAGCTGTATCCTTCAAGAGCCCAAGAGGAATCTCGCCT  
TCTTCCAGCTGAGGAAGGTGTGGGGCCAGGTCTGGCACAGCATCCAGACCCTGAAGGAAGATTGCAACCG  
GCTGCAGCAGGGACAGCGAGCCGCCATGATGAATCTCCTCCGAAACAACAGCTGCCTCTCCAAAATGAAG  
AATTCCATGGCTTCCATGTCTCAGCAGCTCAAGGCCAAGTTGGATTCTTCAAAACCAGCATCCAGATTG  
ACCTGGAGAAGTACAGCGAGCAAACCGAGTTTGGGATCACATCAGATAAACTGCTGCTGGCCTGGAGGGA  
AATGGAGCAGGCTGTGGAGCTCTGTGGGCGGGAGAACGAAGTGAACTCCTGGTAGAACGGATGATGGCT  
CTGCAGACCGACATTGTGGACTTACAGAGGAGCCCCATGGGCCGGAAGCAGGGGGGAACGCTGGACGACC  
TAGAGGAGCAAGCAAGGGAGCTGTACAGGAGACTAAGGGAAAAACCTCGAGACCAGCGAACTGAGGGTGA  
CAGTCAGGAAATGGTACGGCTGCTGCTTCAGGCAATTCAGAGCTTCGAGAAGAAAGTGCGAGTGATCTAT  
ACGCAGCTCAGTAAACTGTGGTTTGCAAGCAGAAGGCGCTGGAAGTGTGCCCAAGGTGGAAGAGGTGG  
TGAGCTTAATGAATGAGGATGAGAAGACTGTTGTCCGGCTGCAGGAGAAGCGGCAGAAGGAGCTCTGGAA  
TCTCCTGAAGATTGCTTGTAGCAAGGTCCGTGGTCCTGTGAGTGAAGCCCGGATAGCATGAATGCCTCT  
CGACTTAGCCAGCCTGGGCAGCTGATGTCTCAGCCCTCCACGGCCTCCAACAGCTTACCTGAGCCAGCCA  
AGAAGAGTGAAGAACTGGTGGCTGAAGCACATAACCTCTGCACCCTGCTAGAAAATGCCATACAGGACAC  
TGTGAGGGAACAAGACCAGAGTTTCACGGCCCTAGACTGGAGCTGGTTACAGACGGAAGAAGAAGAGCAC  
AGCTGCCTGGAGCAGGCCTCATGATGTGGGGGGGACTCGACCCCCTGACATGGGGCAGCCCATAGCAGGCC  
TTGTGCAAGTGGGGGGGACTCGACCCCCTGACATGGGGCTGCCTGGAGCAGGCCGCGTGACGTGGGGCTGCC

TGGCCGCGGCTCTCACATGGTGGTTCCTGCTGCACTGATGGCCCAGGGGTCTCTGGTATCCAGATGGAGC  
TCTCGCTTCCTCAGCAGCTGTGACTTTACCCAGGACCCAGGACGCAGCCCTCCGTGGGCACTGCCGGCG  
CCTTGCTGCACTGGAGGTCCTCCATTACAGAGGCCAGCGCACATCGCTGGCCCCACAAACGTTTACG  
GGGTACAGCCATGGCAGCTCCTTCCTCTGCCGTGAGAAAAGTGCTTGGAGTACGGTTTGCCACACACGTG  
ACTGGACAGTGTCCAATTCAAATCTTTCAGGGCAGAGTCCGAGCAGCGCTTGGTGACAGCCTGTCCTCTC  
CTGCTCTCCAAAGGCCCTGCTCCCTGTCCTCTCTCACTTTACAGCTTGTGTTTCTTCTGGATTACAGTTC  
TCCTAAACAGACAGTTTAATTATAGTTGCGGCCTGGCCCCATCCTCACTTCCTCTTTTATTTCACTGCT  
GCTAAAATTGTGTTTTTACCTACTACTTTGGTGGTTGTCCTCTTTTCGGCAAAGTTGGAGCGAGTGCCAA  
GCTCTCCATCTGTGGTCCTTTCTGCCAAGAGCGACTCATAGTAACCAGGATGGGAGAGCAGCTGCCTTAT  
TCTGAATCCCAAAAATTACTTGGGGGTGATTGTACAGAGGAGGGACAGAAAGGGTATCTGCTGACCACC  
AGCCTGCCTACCCATGCCCATGTCTCCATTCTGCTCAAGCGTGTGTGCTGGGCCGGGGAGTCCCTGTCT  
CTCACAGCATCTAGCAGTATTATTAAATGGATTCATTTTAAAAATAGCTCCTATATTTTGTAAACATGTCT  
CAAACACTCATACTGGGTTCCACAATCCACTGTTAGAATACCTATGGTTAGGGCTTCTGAACTAAAATAA  
TGGAAAATTTTAACAATTTGTATAGTGCCTGGATCATTACTAGTGCCATAACCCTGCTTCTTCAACATTT  
CACAGAACTTCTCTTTTATATAAAGGCAAGAGCACAAAATGAGTTCAGATGATCACAAACAGGTGAGTTT  
TGTTGGAGAAGAAAGTTGGAGTAGGAGACTTTCACAAGTGGTTTCCATGGAGATAGAATGAAGCATTCTG  
TGGTCAAGTAAGTTTAGGGAGCTATTCATGTTTCACTTGCTTTGTGGAGATTCACACTATGCACTGGGAA  
AGTATCTGAAAAGTCTTATAATAAAGAAACAGGCTTAACCTTGTGTAAGAACACTGTTTATCAATGTCAT  
TTGGCTATAGAAACATTTTCTCCTGCTGATTGTGTGTGTGAAACATGTATTAACATTCCAATGAACTAGC  
ATTTAATAAAGCACAAATTTTGAAA

>NM\_001193321.2 Homo sapiens inhibitor of nuclear factor kappa B kinase subunit epsilon (IKBKE),  
transcript variant 3, mRNA

AGTGCTGAGCTTGGTGTCCCACCGCCACAAGGAGGCAGGGAAGAAACCCACTAGTCCCAGCTCCTGGGGT

GGCACAGACATTGCAACTGGCCCTGCCTGTGGGTCTAGGGGCCCTTGGCTACCAGGAGGCTAAGAACAC  
TGCTCATGAATGACAGTGAGCCCTGAAAGCTCTGGGGGTGTCACCCAGTCCCACAAGCCTGCATCCCCTG  
CAGTGGAGATGGGCTCAGCTCCTGGACGTGCCACAGACAGAAAGCATAACATACTCGCCAGGAAGAGC  
CTTGCCTGACTCAGGGCAGCTCAGAGTGTGGGAAATCCGGAGAGCTGGTTGCTGTGAAGGTCTTCAACA  
CTACCAGCTACCTGCGGCCCCGCGAGGTGCAGGTGAGGGAGTTTGAGGTCCTGCGGAAGCTGAACCACCA  
GAACATTGTCAAGCTCTTTGCGGTGGAGGAGACGGGCGGAAGCCGGCAGAAAGGTACTGGTGATGGAGTAC  
TGCTCCAGTGGGAGCCTGCTGAGTGTGCTGGAGAGCCCTGAGAATGCCTTTGGGCTGCCTGAGGATGAGT  
TCCTGGTGGTGTGCGCTGTGTGGTGGCCGGCATGAACCACCTGCGGGAGAACGGCATTGTGCATCGCGA  
CATCAAGCCGGGGAACATCATGCGCCTCGTAGGGGAGGAGGGGCAGAGCATCTACAAGCTGACAGACTTC  
GGCGCTGCCCCGGGAGCTGGATGATGATGAGAAGTTCGTCTCGGTCTATGGGACTGAGGAGTACCTGCATC  
CCGACATGTATGAGCGGGCGGTGCTTCGAAAGCCCCAGCAAAAAGCGTTCGGGGTGACTGTGGATCTCTG  
GAGCATTGGAGTGACCTTGTACCATGCAGCCACTGGCAGCCTGCCCTTCATCCCCTTTGGTGGGCCACGG  
CGGAACAAGGAGATCATGTACCGGATCACACGGAGAAGCCGGCTGGGGCCATTGCAGGTGCCAGAGGC  
GGGAGAACGGGCCCCCTGGAGTGGAGCTACACCCTCCCCATCACCTGCCAGCTGTCACTGGGGCTGCAGAG  
CCAGCTGGTGCCCATCCTGGCCAACATCCTGGAGGTGGAGCAGGCCAAGTGCTGGGGCTTCGACCAGTTC  
TTTGCGGAGACCAGTGACATCCTGCAGCGAGTTGTCGTCCATGTCTTCTCCCTGTCCCAGGCAGTCCTGC  
ACCACATCTATATCCATGCCCACAACACGATAGCCATTTTCAGGAGGCCGTGCACAAGCAGACCAGTGT  
GGCCCCCGACACCAGGAGTACCTCTTTGAGGGTCACCTCTGTGTCCTCGAGCCCAGCGTCTCAGCACAG  
CACATCGCCACACGACGGCAAGCAGCCCCCTGACCCTCTTCAGCACAGCCATCCCTAAGGGGCTGGCCT  
TCAGGGACCCTGCTCTGGACGTCCCCAAGTTCGTCCCCAAAGTGACCTGCAGGCGGATTACAACACTGC  
CAAGGGCGTGTTGGGCGCCGGCTACCAGGCCCTGCGGCTGGCACGGGCCCTGCTGGATGGGCAGGAGCTA  
ATGTTTCGGGGGCTGCACTGGGTCATGGAGGTGCTCCAGGCCACATGCAGACGGACTCTGGAAGTGGCAA  
GGACATCCCTCCTCTACCTCAGCAGCAGCCTGGGAACTGAGAGGTTGAGCAGCGTGGCTGGAACGCCTGA  
GATCCAGGAACTGAAGGCGGCTGCAGAACTGAGGTCCAGGCTGCGGACTCTAGCGGAGGTCCTCTCCAGA  
TGCTCCCAAAATATCACGGAGACCCAGGAGAGCCTGAGCAGCCTGAACGGGAGCTGGTGAAGAGCCGGG

ATCAGGTACATGAGGACAGAAGCATCCAGCAGATTCAGTGCTGTTTGGACAAGATGAACTTCATCTACAA  
ACAGTTCAAGAAGTCTAGGATGAGGCCAGGGCTTGGCTACAACGAGGAGCAGATTCACAAGCTGGATAAG  
GTGAATTTAGTCATTTAGCCAAAAGACTCCTGCAGGTGTTCCAGGAGGAGTGCGTGCAGAAAGTATCAAG  
CGTCCTTAGTCACACACGGCAAGAGGATGAGGGTGGTGCACGAGACCAGGAACCACTGCGCCTGGTTGG  
CTGTTCTGTGGCTGCCTGTAACACAGAAGCCCAGGGGGTCCAGGAGAGTCTCAGCAAGCTCCTGGAAGAG  
CTATCTCACCAGCTCCTTCAGGACCGAGCAAAGGGGGCTCAGGCCTCGCCGCTCCCATAGCTCCTTACC  
CCAGCCCTACACGAAAGGACCTGCTTCTCCACATGCAAGAGCTCTGCGAGGGGATGAAGCTGCTGGCATC  
TGACCTCCTGGACAACAACCGCATCATCGAACGGCTAAATAGAGTCCCAGCACCTCCTGATGTCTGAGCT  
CCATGGGGCACATGAGGCATCCTGAAGCATTAGAATGATTCCAACACTGCTCTTCTGCACCATGAGACCA  
ACCCAGGGCAAGATCCCATCCCATCACATCAGCCTACCTCCCTCCTGGCTGCTGGCCAGGATGTCGCCAG  
CATTACCTTCCACTGCCTTTCTCCCTGGGAAGCAGCACAGCTGAGACTGGGCACCAGGCCACCTCTGTTG  
GGACCCACAGGAAAGAGTGTGGCAGCAACTGCCTGGCTGACCTTTCTATCTTCTCTAGGCTCAGGTACTG  
CTCCTCCATGCCCATGGCTGGGCCGTGGGGAGAAGAAGCTCTCATACGCCTTCCCACTCCCTCTGGTTTA  
TAGGACTTCACTCCCTAGCCAACAGGAGAGGAGGCCTCCTGGGGTTTCCCCAGGGCAGTAGGTCAAACGA  
CCTCATCACAGTCTTCCTTCTCTTCAAGCGTTTCATGTTGAACACAGCTCTCTCCGCTCCCTTGTGATT  
TCTGAGGGTCACCACTGCCAGCCTCAGGCAACATAGAGAGCCTCCTGTTCTTTCTATGCTTGGTCTGACT  
GAGCCTAAAGTTGAGAAAATGGGTGGCCAAGGCCAGTGCCAGTGTCTTGGGGCCCCCTTTGGCTCTCCCTC  
ACTCTCTGAGGCTCCAGCTGGTCTGGGACATGCAGCCAGGACTGTGAGTCTGGGCAGGTCCAAGGCCTG  
CACCTTCAAGAAGTGGAATAAATGTGGCCTTTGCTTCTGTT

>NM\_006850.3 Homo sapiens interleukin 24 (IL24), transcript variant 1, mRNA

GCTTGCCTGCAAACCTTTACTTCTGAAATGACTTCCACGGCTGGGACGGGAACCTTCCACCCACAGCTAT  
GCCTCTGATTGGTGAATGGTGAAGGTGCCTGTCTAACTTTTCTGTAAAAAGAACCAGCTGCCTCCAGGCA

GCCAGCCCTCAAGCATCACTTACAGGACCAGAGGGACAAGACATGACTGTGATGAGGAGCTGCTTTCGCC  
AATTTAACACCAAGAAGAATTGAGGCTGCTTGGGAGGAAGGCCAGGAGGAACACGAGACTGAGAGATGAA  
TTTTCAACAGAGGCTGCAAAGCCTGTGGACTTTAGCCAGACCCTTCTGCCCTCCTTTGCTGGCGACAGCC  
TCTCAAATGCAGATGGTTGTGCTCCCTTGCTGGGTTTTACCCTGCTTCTCTGGAGCCAGGTATCAGGGG  
CCCAGGGCCAAGAATTCCACTTTGGGCCCTGCCAAGTGAAGGGGGTTGTTCCCAGAACTGTGGGAAGC  
CTTCTGGGCTGTGAAAGACACTATGCAAGCTCAGGATAACATCACGAGTGCCCGGCTGCTGCAGCAGGAG  
GTTCTGCAGAACGTCTCGGATGCTGAGAGCTGTTACCTTGTCACACCCTGCTGGAGTTCTACTTGAAAA  
CTGTTTTCAAAAACCTACCACAATAGAACAGTTGAAGTCAGGACTCTGAAGTCATTCTCTACTCTGGCCAA  
CAACTTTGTTCTCATCGTGTCAAACTGCAACCCAGTCAAGAAAATGAGATGTTTTCCATCAGAGACAGT  
GCACACAGGCGGTTTCTGCTATTCCGGAGAGCATTCAAACAGTTGGACGTAGAAGCAGCTCTGACCAAAG  
CCCTTGGGGAAGTGGACATTCTTCTGACCTGGATGCAGAAATTCTACAAGCTCTGAATGTCTAGACCAGG  
ACCTCCCTCCCCCTGGCACTGGTTTGTTCCCTGTGTCATTTCAAACAGTCTCCCTTCCTATGCTGTTTAC  
TGGACACTTCACGCCCTTGGCCATGGGTCCCATTCTTGGCCCAGGATTATTGTCAAAGAAGTCATTCTTT  
AAGCAGCGCCAGTGACAGTCAGGGAAGGTGCCTCTGGATGCTGTGAAGAGTCTACAGAGAAGATTCTTGT  
ATTTATTACAACCTCTATTTAATTAATGTCAAGTATTTCAACTGAAGTTCTATTTATTTGTGAGACTGTAAG  
TTACATGAAGGCAGCAGAATATTGTGCCCCATGCTTCTTTACCCCTCACAATCCTTGCCACAGTGTGGGG  
CAGTGGATGGGTGCTTAGTAAGTACTTAATAAACTGTGGTGCTTTTTTTGGCCTGTCTTTGGATTGTAA  
AAAACAGAGAGGGATGCTTGGATGTAAACTGAACTTCAGAGCATGAAAATCACACTGTCTTCTGATATC  
TGCAGGGACAGAGCATTGGGGTGGGGGTAAAGGTGCATCTGTTTGAAAAGTAAACGATAAAATGTGGATTA  
AAGTGCCACAGCACAAAGCAGATCCTCAATAAACATTTCAATTTCCACCCACACTCGCCAGCTCACCCAT  
CATCCCTTTCCCTTGGTGCCCTCCTTTTTTTTTATCCTAGTCATTCTTCCCTAATCTTCCACTTGAGTG  
TCAAGCTGACCTTGCTGATGGTGACATTGCACCTGGATGTACTATCCAATCTGTGATGACATTCCCTGCT  
AATAAAAGACAACATAACTCAAGTCTGGCAGACTTTCTTCTCTATTTCTGGATGAATGCCAGTGAGACT  
GTGTTGTACAGCTAGAAAAGGCCTTCTTCCCAATAGCAAGGCTGTGCATCTAGCCTCAAGCTCTGGCTGA  
ACTTTGTGGTCGACATCAATCTAAAGATACAGTGTCTGACTATAACCTTGTTCCAAAAACCTAGGCAAAG

AGTATATGTAGGAGGTGGGATATCACTTCCATGACATAAGTGCTATTGCAGAGCCGTGGCCACCCAGGAA  
CTCCTGACTGCTTTCC

>NM\_001145805.2 Homo sapiens immunity related GTPase M (IRGM), transcript variant 2, mRNA

GGTAACCTGCTCAGGTCCCCTTCCATGCTGTGGAAGCTTTGTTTTTTGCACTTTGCAGTAAATCTTGCT  
GCTGCTCATTCTTTGGGTCCACACTGCCTTTATGAGCTGTAACACTCACCGTGAAGGTCTGCAGCATCAC  
TCCTGAAACCTGTGAAACAACGAACCCCCGGGGAGAAACGAACAACTCCAGACTCGCCGCCTGAAGAGC  
TGTAACCTCACTTCGAAGGTCTGCAGCTTCGCTCCTGAGTCAGTGAAACCACGAACCCACCGGAAGGAA  
GAAACTCTGAACACATCCAAACATCAGAAGGAACAACTCCGGACACGCAGCCTTTAAGAATTGTAACAC  
TCACCGCGAGGGTCCGTGGCTTCATTCTTGAAGTCAGTGAGACGAAGAACCCACCAATTCCGGTAGGAGT  
AGGAAATCACATCACCTTCTTTAATCAGTCTCAAATACCTGGCCCCTTGTTGAACCTGCAAGAGCCAGG  
TTTGGCGAATGCAATGATAAGCAATTGTCTAATCACTGCCTTGAAAAAGAGCAGAGCATTTGAGTATGCT  
GTCTCCTCCTCTCCCTCACTTCAGTTGGGCCCAACATGACAGTCTTAATGGAAGCTCGGGGGTCAAAGGC  
TGGTGGCTTACTTCACGTATATTGCAGCATTTAGTACTGCTCTGCACGTGTGCTCCCCGCCTGATGAG  
CTTACTCCAGTGCCACAGATACGACAGAGTGTCCCAAGTGCCCCTCACACTCTATTAGCTGCATCCTTA  
ACCTCTTTTTGCCACACCATAAGCATTGGGTTTTGTTGTTTTGAGATGGAGTCTTGCTCTGTTGCCAGG  
CTGGAGTGCAATGGCGTGATCTCAGCTCACTGCAATATCTGCGTCCAGGGTTCAAGCGATTCCCCTGCCT  
CAGCCTCCTGTATTAGCTGGGACTACAGGCGCACACCACCACGCGCAGCTAATTTTTTTGTATTTTAGTA  
GAGAAGGTTTCACGATGTTGGCCAGGATGGTCTCAATCTCCTGACCTCGTGATCTGCTCGCCTCGGCCTT  
CCAAAGTGCTGGGATTACAGGCATGAGCCACGGCGCCTGGCCAGCATTGGGGTATTTTATTGAAGATGGA  
AGCCATGAATGTTGAGAAAGCCTCAGCAGATGGGAACTTGCCAGAGGTGATCTCTAACATCAAGGAGACT  
CTGAAGATAGTGTCCAGGACACCAGTTAACATCACTATGGCAGGGGACTCTGGCAATGGGATGTCCACCT  
TCATCAGTGCCCTTCGAAACACAGGACATGAGGGTAAGGCCTCACCTCCTACTGAGCTGGTAAAAGCTAC

CCAAAGATGTGCCTCTATTTCTTCCCACTTTTCAAATGTGGTGTTGTGGGACCTGCCTGGCACAGGG  
TCTGCCACCACAACCCTGGAGAACTACCTGATGGAAATGCAGTTCAACCGGTATGACTTCATCATGGTTG  
CATCTGCACAATTCAGCATGAATCATGTGATGCTTGCCAAAACCGCTGAGGACATGGGAAAGAAGTTCTA  
CATTGTCTGGACCAAGCTAGACATGGACCTCAGCACAGGTGCCCTCCCAGAAGTGCAGCTACTGCAGATC  
AGAGAAAATGTCCTGGAAAATCTCCAGAAGGAGCGGGTATGTGAATACTAATTCCTGTCTTCATTAAACA  
TTTTCCATCTCCTC

>NM\_005501.2 Homo sapiens integrin, alpha 3 (antigen CD49C, alpha 3 subunit of VLA-3 receptor)  
(ITGA3), transcript variant b, mRNA

TTTCCCCGGAAGGAAAGCGCAGCCCGGGCTGGGCTCGCAAGGTGGGGAGGTGCGGGACTGGGCGTGGGGA  
GGCGGGGCGCGCGCCGGGGGACCCCTCCCTCCTGTCTCCTTGC GGTCGACCGGTGCGCTTGCCAGATCC  
GCCGCGAAGCCGGGATCGAAGGCGACAGCGCGGCCAAGGGGGCGCGGCCGGGACAAGCTGGGGGCCGGTT  
GCCCCGGGGCAGGGACGGCGGCGACCCGGCCGCTGGGGAGGCAGGAAGATAGACCCACGGATCTTAGGAAG  
GGATCCGAGAGCGCAGCTGTGAAACTGGCTGGGGCTGGGGGCACGAAACCGATCAGCGCTACGGAGCGCA  
GCGGCCGGCGGGTTCCAGTGTCTCCGGCGGCGCGGGGAGCAGGTGAACAGGTCCTCACGCCAGCTCCG  
CGCCCTCACGCGCTCTCGCCGGGACCCCGCTTCCGCTGGCAGCCATGGGCCCCGGCCCCAGCCGCGCGCC  
CCGCGCCCCACGCCTGATGCTCTGTGCGCTCGCCTTGATGGTGGCGGCCGGCGGCTGCGTCGTCTCCGCC  
TTCAACCTGGATACCCGATTCTGGTAGTGAAGGAGGCCGGGAACCCGGGCAGCCTCTTCGGCTACTCGG  
TCGCCCTCCATCGGCAGACAGAGCGGCAGCAGCGCTACCTGCTCCTGGCTGGTGCCCCCGGGAGCTCGC  
TGTGCCCCGATGGCTACACCAACCGGACTGGTGCTGTGTACCTGTGCCACTCACTGCCACAAGGATGAC  
TGTGAGCGGATGAACATCACAGTGAAAAATGACCCTGGCCATCACATTATTGAGGACATGTGGCTTGAG  
TGA CTGTGGCCAGCCAGGGCCCTGCAGGCAGAGTTCTGGTCTGTGCCACCGCTACACCCAGGTGCTGTG

GTCAGGGTCAGAAGACCAGCGGCGCATGGTGGGCAAGTGCTACGTGCGAGGCAATGACCTAGAGCTGGAC  
TCCAGTGATGACTGGCAGACCTACCACAACGAGATGTGCAATAGCAACACAGACTACCTGGAGACGGGCA  
TGTGCCAGCTGGGCACCAGCGGTGGCTTCACCCAGAACACTGTGTACTTCGGCGCCCCCGGTGCCTACAA  
CTGGAAAGGAAACAGCTACATGATTCAGCGCAAGGAGTGGGACTTATCTGAGTATAGTTACAAGGACCCA  
GAGGACCAAGGAAACCTCTATATTGGGTACACGATGCAGGTAGGCAGCTTCATCCTGCACCCCCAAAAACA  
TCACCATTGTGACAGGTGCCCCACGGCACCGACATATGGGCGCGGTGTTCTTGCTGAGCCAGGAGGCAGG  
CGGAGACCTGCGGAGGAGGCAGGTGCTGGAGGGCTCGCAGGTGGGCGCCTATTTTGGCAGCGCCATTGCC  
CTGGCAGACCTGAACAATGATGGGTGGCAGGACCTCCTGGTGGGCGCCCCCTACTACTTCGAGAGGAAAG  
AGGAAGTAGGGGGTGCCATCTATGTCTTCATGAACCAGGCGGGAACCTCCTCCCTGCTCACCCCTCACT  
CCTTCTTCATGGCCCCAGTGGCTCTGCCTTTGGTTTATCTGTGGCCAGCATTGGTGACATCAACCAGGAT  
GGATTTCAAGGATATTGCTGTGGGAGCTCCGTTTGAAGGCTTGGGCAAAGTGACATCTATCACAGTAGCT  
CTAAGGGGCTCCTTAGACAGCCCCAGCAGGTAATCCATGGAGAGAAGCTGGGACTGCCTGGGTTGGCCAC  
CTTCGGCTATTCCCTCAGTGGGCAGATGGATGTGGATGAGAACTTCTACCCAGACCTTCTAGTGGGAAGC  
CTGTCAGACCACATTGTGCTGCTGCGGGCCCGGCCGTCATCAACATCGTCCACAAGACCTTGGTGCCCA  
GGCCAGCTGTGCTGGACCCTGCACTTTGCACGGCCACCTCTTGTGTGCAAGTGGAGCTGTGCTTTGCTTA  
CAACCAGAGTGCCGGGAACCCCAACTACAGGCGAAACATCACCTGGCCTACACTCTGGAGGCTGACAGG  
GACCGCCGGCCGCCCCGGCTCCGCTTTGCCGGCAGTGAGTCCGCTGTCTTCCACGGCTTCTTCTCCATGC  
CCGAGATGCGCTGCCAGAAGCTGGAGCTGCTCCTGATGGACAACCTCCGTGACAAACTCCGCCCCATCAT  
CATCTCCATGAACTACTCTTTACCTTTGCGGATGCCCCGATCGCCCCCGGCTGGGGCTGCGGTCCCTGGAC  
GCCTACCCGATCCTCAACCAGGCACAGGCTCTGGAGAACCACACTGAGGTCCAGTTCAGAAGGAGTGCG  
GGCCTGACAACAAGTGTGAGAGCAACTTGACAGATGCGGGCAGCCTTCGTGTCAGAGCAGCAGCAGAAGCT  
GAGCAGGCTCCAGTACAGCAGAGACGTCCGGAAATTGCTCCTGAGCATCAACGTGACGAACACCCGGACC  
TCGGAGCGCTCCGGGGAGGACGCCACGAGGCGCTGCTCACCTGGTGGTGCCTCCCGCCCTGCTGCTGT  
CCTCAGTGCGCCCCCGGGCCTGCCAAGCTAATGAGACCATCTTTTGCAGCTGGGGAACCCCTTCAA  
ACGGAACCAGAGGATGGAGCTGCTCATCGCCTTTGAGGTATCGGGGTGACCCTGCACACAAGGGACCTT

CAGGTGCAGCTGCAGCTCTCCACGTCGAGTCACCAGGACAACCTGTGGCCCATGATCCTCACTCTGCTGG  
TGGACTATACACTCCAGACCTCGCTTAGCATGGTAAATCACCGGCTACAAAGCTTCTTTGGGGGGACAGT  
GATGGGTGAGTCTGGCATGAAAACTGTGGAGGATGTAGGAAGCCCCCTCAAGTATGAATTCCAGGTGGGC  
CCAATGGGGGAGGGGCTGGTGGGCCTGGGGACCCTGGTCCTAGGTCTGGAGTGGCCCTACGAAGTCAGCA  
ATGGCAAGTGGCTGCTGTATCCACGGAGATCACCGTCCATGGCAATGGGTCCTGGCCCTGCCGACCACC  
TGGAGACCTTATCAACCCTCTCAACCTCACTCTTTCTGACCCTGGGGACAGGCCATCATCCCCACAGCGC  
AGGCGGCGACAGCTGGATCCAGGGGGAGGCCAGGGCCCCCACCTGTCACTCTGGCTGCTGCCAAAAAAG  
CCAAGTCTGAGACTGTGCTGACCTGTGCCACAGGGCGTGCCCACTGTGTGTGGCTAGAGTGCCCCATCCC  
TGATGCCCCCGTTGTCACCAACGTGACTGTGAAGGCACGAGTGTGGAACAGCACCTTCATCGAGGATTAC  
AGAGACTTTGACCGAGTCCGGGTAAATGGCTGGGCTACCCTATTCTCCGAACCAGCATCCCCACCATCA  
ACATGGAGAACAAGACCACGTGGTTCTCTGTGGACATTGACTCGGAGCTGGTGGAGGAGCTGCCGGCCGA  
AATCGAGCTGTGGCTGGTGTGGTGGCCGTGGGTGCAGGGCTGCTGCTGCTGGGGCTGATCATCCTCCTG  
CTGTGGAAGTGTGACTTCTTTAAGCGGACCCGCTATTATCAGATCATGCCCAAGTACCACGCAGTGCGGA  
TCCGGGAGGAGGAGCGCTACCCACCTCCAGGGAGCACCTGCCACCAAGAAGCACTGGGTGACCAGCTG  
GCAGACTCGGGACCAATACTACTGACGTCTCCCTGATCCCACCCCCTCCTCCCCAGTGTCCCCTTTCT  
TCCTATTTATCATAAGTTATGCCTCTGACAGTCCACAGGGGCCACCACTTTGGCTGGTAGCAGCAGGCT  
CAGGCACATACACCTCGTCAAGAGCATGCACATGCTGTCTGGCCCTGGGGATCTTCCCACAGGAGGGCCA  
GCGCTGTGGACCTTACAACGCCGAGTGCACTGCATTCTGTGCCCTAGATGCACGTGGGGCCCACTGCTC  
GTGGACTGTGCTGGTGCATCACGGATGGTGCATGGGCTCGCCGTGTCTCAGCCTCTGCCAGCGCCAAAAC  
AAGCCAAAGAGCCTCCCACCAGAGCCGGGAGGAAAAGGCCCTGCAATGTGGTGACACCTCCCCCTTTCA  
CACTGGATCCATCTTGAGCCACAGTCACTGGATTGACTTTGCTGTCAAACTACTGACAGGGAGCAGCCC  
CCGGGCCGCTGGCTGGTGGGCCCCCAATGACACCCATGCCAGAGAGGTGGGGATCCTGCCTAAGGTTGTC  
TACGGGGGCACTTGAGGACCTGGCGTGCTCAGACCCAACAGCAAAGGAACTAGAAAGAAGGACCCAGAA  
CGGCTTGCTTTCTGCATCTCTGTGAAGCCTCTCTCCTTGGCCACAGACTGAACTCGCAGGGAATGCAGC  
AGGAAGGAACAAAGACAGGCAAACGGCAACGTAGCCTGGGCTCACTGTGCTGGGGCACGGCGGGATCCTC

CACAGAGAGGAGGGGACCAATTCTGGACAGACAGATGTTGGGAGGATACAGAGGAGATGCCACTTCTCAC  
TCACCACTACCAGCCAGCCTCAGAAGGCCCCAGAGAGACCCTGCAAGACCACGGAGGGAGCGACACTTGA  
ATGTAGAATAGGCAGGGGGGCCCTGCCCCACCCCATCCAGCCAGACCCACGCTGACCATGCGTCAGGGGC  
CTAGAGGTGGAGTTCTTAGCTATCCTTGGCTTTCAGAGCCAGCCTGGCTCTGCCCCCTCCCCATGGGCT  
GTGTCCTAAGGCCATTTGAGAAGCTGAGGCTAGTTCAGAAAACCTCTCCTGACCCCTGCCTGTTGGCA  
GGCCCACTCCCCAGCCCCAGCCCCTTCCATGGTACTGTAGCAGGGGAATTCCCTCCCCCTCCTTGTGCCT  
TCTTTGTATATAGGCTTCTCACGGCGACCAATAAACAGCTCCCAGTTTGTATGCAAAAAAAAAAAAAAA  
AA

>NM\_000210.4 Homo sapiens integrin subunit alpha 6 (ITGA6), transcript variant 2, mRNA

AACGGGCTCATTAGCGGTGCGAGCTGCCCCGCGAGGGGGAGCGGCCGGACGGAGAGCGCGACCCGTCCC  
GGGGGTGGGGCCGGGCGCAGCGGCGAGAGGAGGCGAAGGTGGCTGCGGTAGCAGCAGCGGGCAGCCTCG  
GACCCAGCCCGGAGCGCAGGGCGGCCGCTGCAGGTCCCCGCTCCCCTCCCCGTGCGTCCGCCCATGGCCG  
CCGCCGGGCAGCTGTGCTTGCTCTACCTGTCGGCGGGGCTCCTGTCCCGGCTCGGCGCAGCCTTCAACTT  
GGACACTCGGGAGGACAACGTGATCCGGAATATGGAGACCCCGGGAGCCTCTTCGGCTTCTCGCTGGCC  
ATGCACTGGCAACTGCAGCCCGAGGACAAGCGGCTGTTGCTCGTGGGGGCCCCGCGGGCAGAAGCGCTTC  
CACTGCAGAGAGCCAACAGAACGGGAGGGCTGTACAGCTGCGACATCACCGCCCGGGGGCCATGCACGCG  
GATCGAGTTTGATAACGATGCTGACCCACGTGAGAAAGCAAGGAAGATCAGTGGATGGGGGTCACCGTC  
CAGAGCCAAGGTCCAGGGGGCAAGGTCGTGACATGTGCTCACCGATATGAAAAAGGCAGCATGTTAATA  
CGAAGCAGGAATCCCGAGACATCTTTGGGCGGTGTTATGTCCTGAGTCAGAATCTCAGGATTGAAGACGA  
TATGGATGGGGGAGATTGGAGCTTTTGTGATGGGCGATTGAGAGGCCATGAGAAATTTGGCTCTTGCCAG  
CAAGGTGTAGCAGCTACTTTTACTAAAGACTTTCATTACATTGATTTGGAGCCCCGGGTACTTATAACT  
GGAAAGGGATTGTTCGTGTAGAGCAAAAGAATAACACTTTTTTTGACATGAACATCTTTGAAGATGGGCC

TTATGAAGTTGGTGGAGAGACTGAGCATGATGAAAGTCTCGTTCCTGTTCTGCTAACAGTTACTTAGGT  
TTTTCTTTGGACTCAGGGAAAGGTATTGTTTCTAAAGATGAGATCACTTTTGTATCTGGTGCTCCAGAG  
CCAATCACAGTGGAGCCGTGGTTTTGCTGAAGAGAGACATGAAGTCTGCACATCTCCTCCCTGAGCACAT  
ATTCGATGGAGAAGGTCTGGCCTCTTCATTTGGCTATGATGTGGCGGTGGTGGACCTCAACAAGGATGGG  
TGGCAAGATATAGTTATTGGAGCCCCACAGTATTTTGATAGAGATGGAGAAGTTGGAGGTGCAGTGTATG  
TCTACATGAACCAGCAAGGCAGATGGAATAATGTGAAGCCAATTCGTCTTAATGGAACCAAAGATTCTAT  
GTTTGGCATTGCAGTAAAAAATATTGGAGATATTAATCAAGATGGCTACCCAGATATTGCAGTTGGAGCT  
CCGTATGATGACTTGGGAAAGGTTTTATCTATCATGGATCTGCAAATGGAATAAATACCAAACCAACAC  
AGGTTCTCAAGGGTATATCACCTATTTTGGATATTCAATTGCTGGAAACATGGACCTTGATCGAAATTC  
CTACCCTGATGTTGCTGTTGGTTCCTCTCAGATTCAGTAACTATTTTCAGATCCCGGCCTGTGATTAAT  
ATTCAGAAAACCATCACAGTAACTCCTAACAGAATTGACCTCCGCCAGAAAACAGCGTGTGGGGCGCCTA  
GTGGGATATGCCTCCAGGTTAAATCCTGTTTTGAATATACTGCTAACCCCGCTGGTTATAATCCTTCAAT  
ATCAATTGTGGGCACACTTGAAGCTGAAAAAGAAAGAAGAAAATCTGGGCTATCCTCAAGAGTTCAGTTT  
CGAAACCAAGGTTCTGAGCCCAAATATACTCAAGAACTAACTCTGAAGAGGCAGAAACAGAAAGTGTGCA  
TGGAGGAAACCTGTGGCTACAGGATAATATCAGAGATAAACTGCGTCCCATTCCCATAACTGCCTCAGT  
GGAGATCCAAGAGCCAAGCTCTCGTAGGCGAGTGAATTCATTCCAGAAGTTCTTCCAATTCTGAATTCA  
GATGAACCCAAGACAGCTCATATTGATGTTCACTTCTTAAAAGAGGGATGTGGAGACGACAATGTATGTA  
ACAGCAACCTTAACTAGAATATAAATTTTGACCCGAGAAGGAAATCAAGACAAATTTTCTTATTTACC  
AATTCAAAAAGGTGTACCAGAACTAGTTCTAAAAGATCAGAAGGATATTGCTTTAGAAATAACAGTGACA  
AACAGCCCTTCCAACCCAAGGAATCCACAAAAGATGGCGATGACGCCCATGAGGCTAAACTGATTGCAA  
CGTTTCCAGACACTTTAACCTATTCTGCATATAGAGAACTGAGGGCTTTCCTGAGAAACAGTTGAGTTG  
TGTTGCCAACCAGAATGGCTCGCAAGCTGACTGTGAGCTCGGAAATCCTTTTAAAAGAAATTCAAATGTC  
ACTTTTTATTTGGTTTTAAGTACAACCTGAAGTCACCTTTGACACCCCAGATCTGGATATTAATCTGAAGT  
TAGAAACAACAAGCAATCAAGATAATTTGGCTCCAATTACAGCTAAAGCAAAAGTGGTTATTGAAGTCT  
TTTATCGGTCTCGGGAGTTGCTAAACCTTCCCAGGTGTATTTTGGAGGTACAGTTGTTGGCGAGCAAGCT

ATGAAATCTGAAGATGAAGTGGGAAGTTTAATAGAGTATGAATTCAGGGTAATAAACTTAGGTAAACCTC  
TTACAAACCTCGGCACAGCAACCTTGAACATTCAGTGGCCAAAAGAAATTAGCAATGGGAAATGGTTGCT  
TTATTTGGTGAAAGTAGAATCCAAAGGATTGGAAAAGGTAACCTTGTGAGCCACAAAAGGAGATAAACTCC  
CTGAACCTAACGGAGTCTCACAACCTCAAGAAAGAAACGGGAAATTACTGAAAAACAGATAGATGATAACA  
GAAAATTTTCTTTATTTGCTGAAAGAAAATACCAGACTCTTAACTGTAGCGTGAACGTGAACGTGTGTGAA  
CATCAGATGCCCCGCTGCGGGGGCTGGACAGCAAGGCGTCTCTTATTTTGCCTCGAGGTTATGGAACAGC  
ACATTTCTAGAGGAATATTCCAACTGAACTACTTGGACATTCTCATGCGAGCCTTCATTGATGTGACTG  
CTGCTGCCGAAAATATCAGGCTGCCAAATGCAGGCACTCAGGTTTCGAGTGACTGTGTTTCCCTCAAAGAC  
TG TAGCTCAGTATTCGGGAGTACCTTGGTGGATCATCCTAGTGGCTATTCTCGCTGGGATCTTGATGCTT  
GCTTTATTAGTGTTTATACTATGGAAGTGTGGTTTCTTCAAGAGAAATAAGAAAGATCATTATGATGCCA  
CATATCACAAGGCTGAGATCCATGCTCAGCCATCTGATAAAGAGAGGCTTACTTCTGATGCATAGTATTG  
ATCTACTTCTGTAATTGTGTGGATTCTTTAAACGCTCTAGGTACGATGACAGTGTTCCCCGATACCATGC  
TGTAAGGATCCGGAAGAAGAGCGAGAGATCAAAGATGAAAAGTATATTGATAACCTTGAAAAAAAACAG  
TGGATCACAAAGTGGAACGAAAATGAAAGCTACTCATAGCGGGGGCCTAAAAAAAAAAGCTTCACAGTA  
CCCAAACCTGCTTTTTTCCAACTCAGAAATTCAATTTGGATTTAAAAGCCTGCTCAATCCCTGAGGACTGAT  
TTCAGAGTGACTACACACAGTACGAACCTACAGTTTTAACTGTGGATATTGTTACGTAGCCTAAGGCTCC  
TGTTTTGCACAGCCAAATTTAAAACCTGTTGGAATGGATTTTTCTTAACTGCCGTAATTTAACTTTCTGG  
GTTGCCTTTATTTTTGGCGTGGCTGACTTACATCATGTGTTGGGGAAGGGCCTGCCAGTTGCACTCAGG  
TGACATCCTCCAGATAGTGTAGCTGAGGAGGCACCTACACTCACCTGCACTAACAGAGTGGCCGTCTAA  
CCTCGGGCCTGCTGCGCAGACGTCCATCACGTTAGCTGTCCACATCACAAGACTATGCCATTGGGGTAG  
TTGTGTTTCAACGGAAAGTGCTGTCTTAACTAAATGTGCAATAGAAGGTGATGTTGCCATCCTACCGTC  
TTTTCTGTTTCTAGCTGTGTGAATACCTGCTCACGTCAAATGCATACAAGTTTCATTCTCCCTTTAC  
TAAAACACACAGGTGCAACAGACTTGAATGCTAGTTATACTTATTTGTATATGGTATTTATTTTTCTTT  
TCTTTACAAACCATTTTGTATTGACTAACAGGCCAAAGAGTCTCCAGTTTACCCTTCAGGTTGGTTTAA  
TCAATCAGAATTAGAGCATGGGAGGTCATCACTTTGACCTAAATTATTTACTGCAAAAAGAAAATCTTTA

TAAATGTACCAGAGAGAGTGTGTTTTAATAACTTATCTATAAACTATAACCTCTCCTTCATGACAGCCTCC  
ACCCACAACCCAAAAGGTTTAAGAAATAGAATTATAACTGTAAAGATGTTTATTCAGGCATTGGATAT  
TTTTTACTTTAGAAAGCCTGCATAATGTTTCTGGATTTCATACTGTAACATTGAGGAATTCTTGGAGAAAA  
TGGGTTTATTCAGTGAACCTAGTGCGGTTTACTCACTGCTGCAAATACTGTATATTCAGGACTTGAAAG  
AAATGGTGAATGCCTATGGTGGATCCAACTGATCCAGTATAAGACTACTGAATCTGCTACCAAAACAGT  
TAATCAGTGAGTCGATGTTCTATTTTTGTTTTGTTTCCTCCCCTATCTGTATTCCCAAAAATTACTTTG  
GGGCTAATTTAACAAGAACCTTAAATTGTGTTTAAATTGTAAAAATGGCAGGGGGTGAATTATTACTCT  
ATACATTCAACAGAGACTGAATAGATATGAAAGCTGATTTTTTTTAATTACCATGCTTCACAATGTTAAG  
TTATATGGGGAGCAACAGCAAACAGGTGCTAATTTGTTTTGGATATAGTATAAGCAGTGTCTGTGTTTTG  
AAAGAATAGAACACAGTTTGTAGTGCCACTGTTGTTTTGGGGGGGCTTTTTCTTTTCGGAAATCTTAA  
CCTTAAGATACTAAGGACGTTGTTTGGTTGTACTTTGGAATTCTTAGTCACAAAATATATTTGTTTAC  
AAAAATTTCTGTAAACAGGTTATAACAGTGTTTAAAGTCTCAGTTTCTTGCTGGGGAACCTGTGTCCC  
TAATGTGTTTAGATTGCTAGATTGCTAAGGAGCTGATACTTTGACAGTGTTTTTAGACCTGTGTTACTAA  
AAAAAAGATGAATGTCCTGAAAAGGGTGTGGGAGGGTGGTTCAACAAAGAAACAAAGATGTTATGGTGT  
TTAGATTTATGGTTGTTAAAAATGTCATCTCAAGTCAAGTCACTGGTCTGTTTGCAATTTGATACATTTTT  
GTACTAACTAGCATTGTAAAATTATTTTCATGATTAGAAATTACCTGTGGATATTTGTATAAAAGTGTGAA  
ATAAATTTTTTATAAAAGTGTTTCATTGTTTCGTAACACAGCATTGTATATGTGAAGCAAACCTCTAAAATT  
ATAAATGACAACCTGAATTATCTATTTTCATCAAACCAAGTTCAGTGTTTTTATTTTTGGTGTCTCATGT  
AATCTCAGATCAGCCAAAGATACTAGTGCCAAAGCAATGGGATTCGGGGTTTTTTCTGTTTTCGCTCTA  
TGTAGGTGATCCTCAAGTCTTTCATTTTCCTTCTTTATGATTAAGAAACCTACAGGTATTTAACAACC  
TACAAA

>NM\_002211.4 Homo sapiens integrin subunit beta 1 (ITGB1), transcript variant 1A, mRNA

GCCAGCCCGCGGGAGAGGCCAGCGGGAGTCGCGGAACAGCAGGCCCGAGCCCACCGCGCCGGGCCCCGG  
ACGCCGCGCGGAAAAGATGAATTTACAACCAATTTTCTGGATTGGACTGATCAGTTCAGTTTGCTGTGTG  
TTTGCTCAAACAGATGAAAATAGATGTTTAAAAGCAAATGCCAAATCATGTGGAGAATGTATACAAGCAG  
GGCCAAATTGTGGGTGGTGCACAAATTCAACATTTTACAGGAAGGAATGCCTACTTCTGCACGATGTGA  
TGATTTAGAAGCCTTAAAAAAGAAGGGTTGCCCTCCAGATGACATAGAAAATCCCAGAGGCTCCAAAGAT  
ATAAAGAAAAATAAAAATGTAACCAACCGTAGCAAAGGAACAGCAGAGAAGCTCAAGCCAGAGGATATTA  
CTCAGATCCAACCACAGCAGTTGGTTTTGCGATTAAGATCAGGGGAGCCACAGACATTTACATTAATAATT  
CAAGAGAGCTGAAGACTATCCCATTGACCTCTACTACCTTATGGACCTGTCTTACTCAATGAAAGACGAT  
TTGGAGAATGTAAAAAGTCTTGGAACAGATCTGATGAATGAAATGAGGAGGATTACTTCGGACTTCAGAA  
TTGGATTTGGCTCATTTGTGGAAGAACTGTGATGCCTTACATTAGCACAAACACCAGCTAAGCTCAGGAA  
CCCTTGACAAGTGAACAGAACTGCACCAGCCCATTAGCTACAAAAATGTGCTCAGTCTTACTAATAAA  
GGAGAAGTATTTAATGAACTTGTTGGAAACAGCGCATATCTGGAAATTTGGATTCTCCAGAAGGTGGTT  
TCGATGCCATCATGCAAGTTGCAGTTTGTGGATCACTGATTGGCTGGAGGAATGTTACACGGCTGCTGGT  
GTTTTCCACAGATGCCGGGTTTCACTTTGCTGGAGATGGGAACTTGGTGGCATTGTTTTACCAAATGAT  
GGACAATGTCACCTGGAAAATAATATGTACACAATGAGCCATTATTATGATTATCCTTCTATTGCTCACC  
TTGTCCAGAACTGAGTGAAAATAATATTCAGACAATTTTGCAGTTACTGAAGAATTTAGCCTGTTTA  
CAAGGAGCTGAAAACTTGATCCCTAAGTCAGCAGTAGGAACATTATCTGCAAATTCTAGCAATGTAATT  
CAGTTGATCATTGATGCATACAATCCCTTTCCTCAGAAGTCATTTTGAAAAACGGCAAATTGTCAGAAG  
GCGTAACAATAAGTTACAAATCTTACTGCAAGAACGGGGTGAATGGAACAGGGGAAAATGGAAGAAAATG  
TTCCAATATTTCCATTGGAGATGAGGTTCAATTTGAAATTAGCATAACTTCAAATAAGTGTCCAAAAAAG  
GATTCTGACAGCTTTAAAATTAGGCCTCTGGGCTTTACGGAGGAAGTAGAGGTTATTCTTCAGTACATCT  
GTGAATGTGAATGCCAAAGCGAAGGCATCCCTGAAAGTCCCAAGTGTCATGAAGGAAATGGGACATTTGA  
GTGTGGCGCGTGCAAGTGCAATGAAGGGCGTGTTGGTAGACATTGTGAATGCAGCACAGATGAAGTTAAC  
AGTGAAGACATGGATGCTTACTGCAGGAAAGAAAACAGTTCAGAAATCTGCAGTAACAATGGAGAGTGCG

TCTGCGGACAGTGTGTTTGTAGGAAGAGGGATAATACAAATGAAATTTATTCTGGCAAATTCTGCGAGTG  
TGATAATTTCAACTGTGATAGATCCAATGGCTTAATTTGTGGAGGAAATGGTGTTCGCAAGTGTCGTGTG  
TGTGAGTGCAACCCCACTACACTGGCAGTGCATGTGACTGTTCTTTGGATACTAGTACTTGTGAAGCCA  
GCAACGGACAGATCTGCAATGGCCGGGGCATCTGCGAGTGTGGTGTCTGTAAGTGTACAGATCCGAAGTT  
TCAAGGGCAAACGTGTGAGATGTGTCAGACCTGCCTTGGTGTCTGTGCTGAGCATAAAGAATGTGTTCAG  
TGCAGAGCCTTCAATAAAGGAGAAAAAGAACACATGCACACAGGAATGTTCTATTTAACATTACCA  
AGGTAGAAAGTCGGGACAAATTACCCAGCCGGTCCAACCTGATCCTGTGTCCCATTGTAAGGAGAAGGA  
TGTTGACGACTGTTGGTTCTATTTTACGTATTCACTGAATGGGAACAACGAGGTCATGGTTCATGTTGTG  
GAGAATCCAGAGTGTCCCACTGGTCCAGACATCATTCCAATTGTAGCTGGTGTGGTTGCTGGAATTGTTT  
TTATTGGCCTTGCATTACTGCTGATATGGAAGCTTTTAATGATAATTCATGACAGAAGGGAGTTTGCTAA  
ATTTGAAAAGGAGAAAAATGAATGCCAAATGGGACACGGGTGAAAATCCTATTTATAAGAGTGCCGTAACA  
ACTGTGGTCAATCCGAAGTATGAGGGAAAAATGAGTACTGCCCCGTGCAAATCCCACAACACTGAATGCAAA  
GTAGCAATTTCCATAGTCACAGTTAGGTAGCTTTAGGGCAATATTGCCATGGTTTTACTCATGTGCAGGT  
TTTGAAAATGTACAATATGTATAATTTTTAAATGTTTTATTATTTGAAAATAATGTTGTAATTCATGC  
CAGGGACTGACAAAAGACTTGAGACAGGATGGTTACTCTTGTCAGCTAAGGTCACATTGTGCCTTTTTGA  
CCTTTTCTTCTGGACTATTGAAATCAAGCTTATTGGATTAAGTGATATTTCTATAGCGATTGAAAGGGC  
AATAGTTAAAGTAATGAGCATGATGAGAGTTTCTGTTAATCATGTATTAAACTGATTTTTAGCTTTACA  
AATATGTCAGTTTGCAGTTATGCAGAATCCAAAGTAAATGTCCTGCTAGCTAGTTAAGGATTGTTTTAAA  
TCTGTTATTTTGCTATTTGCCTGTTAGACATGACTGATGACATATCTGAAAGACAAGTATGTTGAGAGTT  
GCTGGTGTAAAATACGTTTGAAATAGTTGATCTACAAAGGCCATGGGAAAAATTCAGAGAGTTAGGAAGG  
AAAAACCAATAGCTTTAAACCTGTGTGCCATTTTAAGAGTTACTTAATGTTTGTTAACTTTTATGCCTT  
CACTTTACAAATTCAAGCCTTAGATAAAAGAACCGAGCAATTTCTGCTAAAAAGTCCTTGATTTAGCAC  
TATTTACATACAGGCCATACTTTACAAAGTATTTGCTGAATGGGGACCTTTTGAGTTGAATTTATTTTAT  
TATTTTATTTTGTTAATGTCTGGTGCTTTCTGTCACCTCTTCTAATCTTTAATGTATTTGTTTGCAA  
TTTTGGGGTAAGACTTTTTTTATGAGTACTTTTTCTTTGAAGTTTTAGCGGTCAATTTGCCTTTTTAATG

AACATGTGAAGTTATACTGTGGCTATGCAACAGCTCTCACCTACGCGAGTCTTACTTTGAGTTAGTGCCA  
TAACAGACCACTGTATGTTTACTTCTCACCATTTGAGTTGCCCATCTTGTTTCACACTAGTCACATTCTT  
GTTTAAAGTGCCTTTAGTTTAAACAGTTCACCTTTTACAGTGCTATTTACTGAAGTTATTTATTAAATAT  
GCCTAAATACTTAAATCGGATGTCTTGACTCTGATGTATTTTATCAGGTTGTGTGCATGAAATTTTAT  
AGATTAAAGAAGTTGAGGAAAAGCA

>NM\_000213.5 Homo sapiens integrin subunit beta 4 (ITGB4), transcript variant 1, mRNA

CCCCCAACCCCGCGCCCGCCCTCGGACAGTCCCTGCTCGCCCGCGCGCTGCAGCCCCATCTCCTAGCGG  
CAGCCCAGGCGCGGAGGGAGCGAGTCCGCCCCGAGGTAGGTCCAGGACGGGCGCACAGCAGCAGCCGAGG  
CTGGCCGGGAGAGGGAGGAAGAGGATGGCAGGGCCACGCCCCAGCCCATGGGCCAGGCTGCTCCTGGCAG  
CCTTGATCAGCGTCAGCCTCTCTGGGACCTTGCGAAACCGCTGCAAGAAGGCCCCAGTGAAGAGCTGCAC  
GGAGTGTGTCCGTGTGGATAAGGACTGCGCCTACTGCACAGACGAGATGTTCAAGGACCGGCGCTGCAAC  
ACCCAGGCGGAGCTGCTGGCCGCGGGCTGCCAGCGGGAGAGCATCGTGGTCATGGAGAGCAGCTTCCAAA  
TCACAGAGGAGACCCAGATTGACACCACCTGCGGCGCAGCCAGATGTCCCCCAAGGCCTGCGGGTCCG  
TCTGCGGCCCGGTGAGGAGCGGCATTTTGAGCTGGAGGTGTTTGAGCCACTGGAGAGCCCCGTGGACCTG  
TACATCCTCATGGACTTCTCCAACCTCATGTCCGATGATCTGGACAACCTCAAGAAGATGGGGCAGAACC  
TGGCTCGGGTCTGAGCCAGCTCACCAGCGACTACACTATTGGATTTGGCAAGTTTGTGGACAAAGTCAG  
CGTCCCGCAGACGGACATGAGGCCTGAGAAGCTGAAGGAGCCCTGGCCCAACAGTGACCCCCCTTCTCC  
TTCAAGAACGTCATCAGCCTGACAGAAGATGTGGATGAGTTCCGGAATAAACTGCAGGGAGAGCGGATCT  
CAGGCAACCTGGATGCTCCTGAGGGCGGCTTCGATGCCATCCTGCAGACAGCTGTGTGCACGAGGGACAT  
TGGCTGGCGCCCGGACAGCACCCACCTGCTGGTCTTCTCCACCGAGTCAGCCTTCCACTATGAGGCTGAT  
GGCGCCAACGTGCTGGCTGGCATCATGAGCCGCAACGATGAACGGTGCCACCTGGACACCACGGGCACCT  
ACACCCAGTACAGGACACAGGACTACCCGTCGGTGCCACCCCTGGTGCGCCTGCTCGCCAAGCACAAACAT

CATCCCCATCTTTGCTGTCACCAACTACTCCTATAGCTACTACGAGAAGCTTCACACCTATTTCCCTGTC  
TCCTCACTGGGGGTGCTGCAGGAGGACTCGTCCAACATCGTGGAGCTGCTGGAGGAGGCCTTCAATCGGA  
TCCGCTCCAACCTGGACATCCGGGGCCCTAGACAGCCCCGAGGCCTTCGGACAGAGGTCACCTCCAAGAT  
GTTCCAGAAGACGAGGACTGGGTCCTTTACATCCGGCGGGGGGAAGTGGGTATATACCAGGTGCAGCTG  
CGGGCCCTTGAGCACGTGGATGGGACGCACGTGTGCCAGCTGCCGGAGGACCAGAAGGGCAACATCCATC  
TGAAACCTTCCTTCTCCGACGGCCTCAAGATGGACGCGGGCATCATCTGTGATGTGTGCACCTGCGAGCT  
GCAAAAAGAGGTGCGGTCAGCTCGCTGCAGCTTCAACGGAGACTTCGTGTGCGGACAGTGTGTGTGCAGC  
GAGGGCTGGAGTGGCCAGACCTGCAACTGCTCCACCGGCTCTCTGAGTGACATTCAGCCCTGCCTGCGGG  
AGGGCGAGGACAAGCCGTGCTCCGGCCGTGGGGAGTGCCAGTGCGGGCACTGTGTGTGCTACGGCGAAGG  
CCGCTACGAGGGTCAGTTCTGCGAGTATGACAACTTCCAGTGTCCCCGCACTTCCGGGTTCTCTGCAAT  
GACCGAGGACGCTGCTCCATGGGCCAGTGTGTGTGTGAGCCTGGTTGGACAGGCCCAAGCTGTGACTGTC  
CCCTCAGCAATGCCACCTGCATCGACAGCAATGGGGGCATCTGTAATGGACGTGGCCACTGTGAGTGTGG  
CCGCTGCCACTGCCACCAGCAGTCGCTCTACACGGACACCATCTGCGAGATCAACTACTCGGCGATCCAC  
CCGGGCCTCTGCGAGGACCTACGCTCCTGCGTGCAAGTGGTGGACGAGCTTAAGAGAGCCGAGGAGGTGGTGGT  
GCACGTGTGAGGAATGCAACTTCAAGGTCAAGATGGTGGACGAGCTTAAGAGAGCCGAGGAGGTGGTGGT  
GCGCTGCTCCTTCCGGGACGAGGATGACGACTGCACCTACAGCTACACCATGGAAGGTGACGGCGCCCCCT  
GGGCCCCAACAGCACTGTCCTGGTGCACAAGAAGAAGGACTGCCCTCCGGGCTCCTTCTGGTGGCTCATCC  
CCCTGCTCCTCCTCCTGCCGCTCCTGGCCCTGCTACTGCTGCTATGCTGGAAGTACTGTGCCTGCTG  
CAAGGCCTGCCTGGCACTTCTCCCGTGCTGCAACCGAGGTCACATGGTGGGCTTTAAGGAAGACCACTAC  
ATGCTGCGGGAGAACCTGATGGCCTCTGACCACTTGGACACGCCCATGCTGCGCAGCGGGAACCTCAAGG  
GCCGTGACGTGGTCCGCTGGAAGGTCACCAACAACATGCAGCGGCCTGGCTTTGCCACTCATGCCGCCAG  
CATCAACCCACAGAGCTGGTGGCCTACGGGCTGTCCTTGCGCCTGGCCCGCCTTTGCACCGAGAACCTG  
CTGAAGCCTGACACTCGGGAGTGCGCCCAGCTGCGCCAGGAGGTGGAGGAGAACCTGAACGAGGTCTACA  
GGCAGATCTCCGGTGTACACAAGCTCCAGCAGACCAAGTTCCGGCAGCAGCCCAATGCCGGGAAAAAGCA  
AGACCACACCATTTGTGGACACAGTGCTGATGGCGCCCCGCTCGGCCAAGCCGGGCCCTGCTGAAGCTTACA

GAGAAGCAGGTGGAACAGAGGGCCTTCCACGACCTCAAGGTGGCCCCGGCTACTACACCCTCACTGCAG  
ACCAGGACGCCCCGGGCATGGTGGAGTTCCAGGAGGGCGTGGAGCTGGTGGACGTACGGGTGCCCTCTT  
TATCCGGCCTGAGGATGACGACGAGAAGCAGCTGCTGGTGGAGGCCATCGACGTGCCCCGAGGCACTGCC  
ACCCTCGGCCGCCGCTGGTAAACATCACCATCATCAAGGAGCAAGCCAGAGACGTGGTGTCTTTGAGC  
AGCCTGAGTTCTCGGTAGCCGCGGGGACCAGGTGGCCCGCATCCCTGTCATCCGGCGTGTCTTGACGG  
CGGGAAGTCCCAGGTCTCTACCGCACACAGGATGGCACCGCGCAGGGCAACCGGGACTACATCCCCGTG  
GAGGGTGAGCTGCTGTTCCAGCCTGGGGAGGCCTGGAAAGAGCTGCAGGTGAAGCTCCTGGAGCTGCAAG  
AAGTTGACTCCCTCCTGCGGGGCGCCAGGTCCGCCGTTTCCACGTCCAGCTCAGCAACCCTAAGTTTG  
GGCCACCTGGGCCAGCCCCACTCCACCACCATCATCATCAGGGACCCAGATGAACTGGACCGGAGCTTC  
ACGAGTCAGATGTTGTCATCACAGCCACCCCTCACGGCGACCTGGGCGCCCCGCAGAACCCCAATGCTA  
AGGCCGCTGGGTCCAGGAAGATCCATTTCAACTGGCTGCCCCCTTCTGGCAAGCCAATGGGGTACAGGGT  
AAAGTACTGGATTACAGGGTGACTCCGAATCCGAAGCCACCTGCTCGACAGCAAGGTGCCCTCAGTGGAG  
CTCACCAACCTGTACCCGTATTGCGACTATGAGATGAAGGTGTGCGCCTACGGGGCTCAGGGCGAGGGAC  
CCTACAGCTCCCTGGTGTCTGCCGCACCCACCAGGAAGTGCCCAGCGAGCCAGGGCGTCTGGCCTTCAA  
TGTCGTCTCCTCCACGGTGACCCAGCTGAGCTGGGCTGAGCCGGCTGAGACCAACGGTGAGATCACAGCC  
TACGAGGTCTGCTATGGCCTGGTCAACGATGACAACCGACCTATTGGGCCCATGAAGAAAGTGCTGGTTG  
ACAACCCTAAGAACCGGATGCTGCTTATTGAGAACCTTCGGGAGTCCCAGCCCTACCGCTACACGGTGAA  
GGCGCGCAACGGGGCCGGCTGGGGGCCTGAGCGGGAGGCCATCATCAACCTGGCCACCCAGCCCAAGAGG  
CCCATGTCCATCCCCATCATCCCTGACATCCCTATCGTGGACGCCCAGAGCGGGGAGGACTACGACAGCT  
TCCTTATGTACAGCGATGACGTTCTACGCTCTCCATCGGGCAGCCAGAGGCCAGCGTCTCCGATGACAC  
TGGCTGCGGCTGGAAGTTCGAGCCCCTGCTGGGGGAGGAGCTGGACCTGCGGCGCGTACGTGGCGGCTG  
CCCCGGAGCTCATCCCGCGCTGTCGGCCAGCAGCGGGCGCTCCTCCGACGCCGAGGCGCCCCACGGGC  
CCCCGGACGACGGCGGCGGGCGGGAAGGGCGGCAGCCTGCCCCGAGTGCGACACCCGGGCCCCCGG  
AGAGCACCTGGTGAATGGCCGGATGGACTTTGCCTTCCCGGGCAGCACCAACTCCCTGCACAGGATGACC  
ACGACCAGTGCTGCTGCCTATGGCACCCACCTGAGCCCACACGTGCCCCACGCGTGCTAAGCACATCCT

CCACCCTCACACGGGACTACAACTCACTGACCCGCTCAGAACACTCACACTCGACCACACTGCCCAGGGA  
CTACTCCACCCTCACCTCCGTCTCCTCCCACGACTCTCGCCTGACTGCTGGTGTGCCCCGACACGCCCACC  
CGCCTGGTGTCTCTGCCCTGGGGCCACATCTCTCAGAGTGAGCTGGCAGGAGCCGCGGTGCGAGCGGC  
CGCTGCAGGGCTACAGTGTGGAGTACCAGCTGCTGAACGGCGGTGAGCTGCATCGGCTCAACATCCCCAA  
CCCTGCCCAGACCTCGGTGGTGGTGAAGACCTCCTGCCCAACCACTCCTACGTGTTCCGCGTGCGGGCC  
CAGAGCCAGGAAGGCTGGGGCCGAGAGCGTGAGGGTGTATCACCATTGAATCCCAGGTGCACCCGAGAG  
GCCCCTGTGTCCCCTGCCAGGCTCCGCCTTCACTTTGAGCACTCCCAGTGCCCCAGGCCCGCTGGTGT  
CACTGCCCTGAGCCCAGACTCGCTGCAGCTGAGCTGGGAGCGGCCACGGAGGCCAATGGGGATATCGTC  
GGCTACCTGGTGACCTGTGAGATGGCCCAAGGAGGAGGGCCAGCCACCGCATTCCGGGTGGATGGAGACA  
GCCCCGAGAGCCGGCTGACCGTGCCGGGCCTCAGCGAGAACGTGCCCTACAAGTTCAAGGTGCAGGCCAG  
GACCACTGAGGGCTTCGGGCCAGAGCGCGAGGGCATCATCACCATAGAGTCCCAGGATGGAGGACCCTTC  
CCGCAGCTGGGCAGCCGTGCCGGGCTCTCCAGCACCCGCTGCAAAGCGAGTACAGCAGCATCACCACCA  
CCCACACCAGCGCCACCGAGCCCTTCCTAGTGGATGGGCTGACCCTGGGGGCCAGCACCTGGAGGCAGG  
CGGCTCCCTCACCCGGCATGTGACCCAGGAGTTTGTGAGCCGGACACTGACCACCAGCGGAACCCCTTAGC  
ACCCACATGGACCAACAGTTCTTCCAACTTGACCGCACCCCTGCCCCACCCCGCCACGTCCCCTAGGC  
GTCCTCCCGACTCCTCTCCCGGAGCCTCCTCAGCTACTCCATCCTTGACCCCTGGGGGCCAGCCCACC  
CGCATGCACAGAGCAGGGGCTAGGTGTCTCCTGGGAGGCATGAAGGGGGCAAGGTCCGTCCTCTGTGGGC  
CCAAACCTATTTGTAACCAAAGAGCTGGGAGCAGCACAAGGACCCAGCCTTTGTTCTGCACTTAATAAAT  
GGTTTTGCTACTGCTA

>NM\_002222.7 Homo sapiens inositol 1,4,5-trisphosphate receptor type 1 (ITPR1), transcript variant 2, mRNA

GCAGTAACCATGTGGATGTGCTGCTGAAGCGTTTCCTCAAGCTCGCTGGGGTGGGAGGAGAGGAGGAGGA

GGAGGTGGTGGTGGAGGAGGAGGCAGGGGGTGGAGAGAGAGAAAAGCGCACGCCGAGAGGAGGTGTGGGTG  
TTCCGCTTCCATCCTAACGGAACGAGCTCCCTCTTCGCGGACATGGGATTACCCAGCGGCTGCTAACCCC  
TCTCCTCGCCCTGCTCCCCAAACCGGCGTGGCTCCCCGGGCACCAAGGAGCTGACTACAGAGGAGCAGG  
ATTTGCACCCCTCGCTGGGCTTGCTTTGGCAACAGAGTGCCTGACCCAGGTCAGGATTTTCAAGAAAGAC  
ATGTCTGACAAAATGTCTAGCTTCCTACATATTGGAGACATTTGTTCTCTGTACGCGGAGGGATCGACAA  
ATGGATTTATTAGCACCTTGCGCCTGGTTGATGATCGTTGTGTTGTACAGCCAGAAACCGGGGACCTTAA  
CAATCCACCTAAGAAATTCAGAGACTGCCTCTTTAAGCTATGTCCCATGAACCGCTACTCTGCCAAAAG  
CAGTTCTGGAAAGCCGCTAAGCCTGGGGCCAAACAGCACCCACAGACGCAGTGCTACTCAACAACTGCACC  
ACGCTGCAGACTTGGAAAAGAAGCAGAATGAGACAGAAAACAGGAAATTGCTGGGGACCGTAATCCAGTA  
TGGCAATGTGATCCAGCTCCTGCATTTGAAAAGTAATAAATACCTAACAGTGAATAAGAGGCTTCCTGCT  
CTGTTGGAGAAGAATGCCATGAGAGTCACATTGGACGAGGCTGGAAATGAAGGGTCTGTTTTATATTC  
AGCCATTCTACAAGCTGCGATCCATTGGAGACAGCGTGGTCATAGGTGACAAGGTGGTTCTGAACCCCGT  
CAATGCTGGTCAGCCCCTACATGCTAGCAGCCATCAACTGGTAGATAACCCAGGCTGCAATGAGGTCAAT  
TCCGTCAACTGCAATACAAGCTGGAAAATAGTCCTTTTCATGAAATGGAGTGATAACAAAGACGACATAT  
TAAAGGGGGGTGACGTGGTGAGGCTGTTTCATGCTGAGCAGGAGAAGTTTCTACCTGTGACGAACACAG  
GAAGAAGCAGCACGTCTTCCTGAGAACCACGGGCCGGCAGTCGGCCACATCTGCCACCAGTTCAAAAGCC  
CTGTGGGAGGTGGAGGTGGTCCAGCATGACCCATGTCGGGGCGGAGCAGGGTATTGGAACAGCCTTTTCC  
GTTTCAAGCATCTGGCCACGGGGCATTACTTGGCAGCAGAGGTGGACCCTGATCAGGACGCCTCTCGAAG  
TAGGTTGCGGAATGCCAAGAAAAGATGGTATACTCCCTGGTCTCTGTGCCTGAAGGCAATGACATCTCC  
TCCATTTTCGAGCTAGATCCCACCACTCTGCGTGGAGGTGACAGCCTTGTCCTCAAGGAACTCTTATGTTT  
GGCTCAGACACCTATGTACTAATACCTGGGTTCACAGCACAAATATTCCTATTGACAAGGAAGAAGAAAA  
GCCCGTGATGCTGAAAATTGGCACCTCTCCTGTGAAGGAGGATAAGGAAGCATTGCCATAGTTCCGGTT  
TCTCCTGCTGAAGTTCGGGACCTGGACTTTGCCAATGATGCCAGCAAGGTGCTGGGCTCCATTGCTGGGA  
AGCTAGAGAAGGGCACCATCACCCAGAATGAAAGGAGGTCTGTAACCAAGCTGCTAGAAGATTTGGTTTA  
CTTCGTCAGTGGTGGAACTAATTCTGGTCAAGATGTTCTCGAAGTTGTCTTCTCAAGCCCAACAGAGAA

CGGCAGAACTGATGAGAGAACAGAATATTCTCAAGCAGATCTTCAAGTTGTTACAAGCCCCATTACAG  
ACTGCGGTGATGGCCCAATGCTTCGGCTGGAAGAGCTCGGGGACCAGCGGCACGCTCCTTTCAGACACAT  
CTGCCGGCTCTGCTACAGGGTGCTGAGACACTCGCAGCAAGACTACAGGAAGAACCAGGAGTATATAGCC  
AAGCAGTTTGGCTTCATGCAGAAGCAGATTGGCTATGATGTGTTGGCTGAAGACACTATCACTGCCCTGC  
TCCACAATAATCGGAACTCCTGGAAAAACACATTACCGCGGCAGAGATTGACACATTTGTCAGCCTGGT  
GCGAAAGAACAGGGAGCCCAGATTCTTAGATTACCTCTCCGACCTCTGTGTCTCCATGAACAAATCAATT  
CCAGTGACCCAGGAACTGATATGTAAAGCTGTGCTGAACCCACCAACGCTGACATCCTGATTGAGACCA  
AGTTGGTTCTTCTCGTTTTGAATTTGAAGGTGTCTCTTCCACTGGAGAGAATGCTCTGGAGGCAGGAGA  
AGACGAGGAAGAGGTGTGGCTGTTTTGGAGGGACAGCAACAAAGAGATTCGCAGCAAGAGTGTGAGGGAA  
TTGGCTCAGGATGCTAAAGAAGGGCAGAAGGAGGACCGAGACGTTCTCAGCTACTACAGATATCAGCTGA  
ACCTCTTTGCGAGGATGTGTCTGGACCGCAATACCTGGCCATCAACGAAATCTCAGGCCAGCTGGATGT  
CGATCTCATTCTCCGCTGCATGTCTGACGAGAACCTGCCCTATGACCTCAGGGCGTCCTTCTGCCGCCTC  
ATGCTTCACATGCATGTGGACCGAGATCCCCAGGAACAAGTCACCCCGTGAAATATGCCCGCCTCTGGT  
CGGAGATTCCCTCGGAGATCGCCATTGACGACTATGATAGTAGTGGAGCTTCAAAGATGAAATTAAGGA  
GAGATTTGCTCAGACCATGGAGTTTGTGGAGGAGTATTTAAGAGATGTGGTTTGTGAGAGGTTCCCTTTC  
TCTGATAAAGAGAAGAATAAGCTTACGTTTGAGGTTGTAAATTTAGCTAGGAATCTCATATACTTTGGTT  
TCTACAACTTCTCTGACCTTCTACGATTAAGATCCTTCTGGCCATATTGGACTGTGTACATGTGAC  
AACAATCTTCCCCATTAGCAAGATGGCGAAAGGAGAAGAGAATAAAGGCAGTAACGTGATGAGATCTATT  
CATGGCGTGGGAGAGCTGATGACCCAGGTGGTGCTCCGGGGAGGAGGCTTTTTGCCCATGACTCCCATGG  
CTGCTGCCCCCTGAAGGCAATGTGAAGCAGGCAGAGCCTGAGAAGGAGGACATCATGGTCATGGACACCAA  
GCTGAAGATCATTGAGATACTCCAGTTTATTTTGAATGTGAGGTTGGATTATAGGATCTCCTGCCTCCTG  
TGTATATTTAAGCGAGAGTTTGATGAAAGCAATCCAGACTTCAGAAACATCCTCCGGAAACAGCAGCC  
AAGAAGGGCCAAGTAATGTACCAGGTGCTCTTGACTTTGAACACATTGAAGAACAAGCAGAAGGCATCTT  
TGGAGGAAGTGAGGAGAACACCCCACTGGACTTGGATGACCACGGCGGCAGAACCTTTCTCCGTGTCCTG  
CTCCACTTGACGATGCATGACTACCCACCCCTGGTGTCAGGGGCCCTGCAGCTCCTCTTCCGGCACTTCA

GCCAGAGGCAGGAGGTGCTCCAGGCCTTCAAACAGGTTCAACTGCTGGTTACCAGCCAAGATGTGGACAA  
CTACAAACAGATCAAACAAGACTTGGATCAACTGAGGTCCATCGTGAAAAAGTCAGAGCTTTGGGTGTAC  
AAAGGGCAGGGCCCCGATGAGACTATGGATGGTGCATCTGGAGAAAATGAACATAAGAAAACGGAGGAGG  
GAAATAACAAGCCACAAAAGCATGAAAGCACCAGCAGCTACAACCTACAGAGTGGTCAAAGAGATTTTGAT  
TCGGCTTAGCAAACCTCTGTGTTCAAGAGAGTGCCTCAGTGAGAAAGAGCAGGAAGCAGCAACAGCGTCTG  
CTCCGGAACATGGGCGCGCACGCCGTGGTGCTGGAGCTGCTGCAGATTCCCTATGAGAAGGCCGAAGATA  
CCAAGATGCAAGAGATAATGAGGTTGGCTCATGAATTTTTGCAGAATTTCTGCGCAGGCAACCAGCAGAA  
TCAAGCTTTGCTACATAAACACATAAACCTGTTTCTCAACCCAGGGATCCTGGAGGCAGTAACCATGCAG  
CACATCTTCATGAACAATTTCCAGCTTTGCAGTGAGATCAACGAGAGAGTTGTTTCAGCACTTCGTTCACT  
GCATAGAGACTCACGGTCGGAATGTCCAGTATATAAAGTTCTTACAGACAATTGTCAAGGCAGAAGGGAA  
ATTTATTAATAAATGCCAAGACATGGTTATGGCCGAGCTGGTCAATTCGGGAGAGGATGTCCTCGTGTTCT  
TACAACGACAGAGCCTCTTTCCAGACTCTGATCCAGATGATGCGGTCAGAACGGGATCGGATGGATGAGA  
ACAGCCCTCTCATGTACCACATCCACTTGGTCGAGCTCCTGGCTGTGTGCACGGAGGGTAAGAATGTCTA  
CACAGAGATCAAGTGCAACTCCCTGCTCCCGCTGGATGACATCGTTCGCGTGGTGACCCACGAGGACTGC  
ATCCCTGAGGTTAAATGCATACATTAACCTCCTGAATCACTGCTATGTGGATACAGAGGTGGAAATGA  
AGGAGATTTATACCAGCAATCACATGTGGAAATTGTTTGAGAATTCCTTGAGACATCTGCAGGGCCTG  
TAACAACACTAGTGACAGGAAACATGCAGACTCGATTTTGGAGAAGTATGTCACCGAAATCGTCATGAGT  
ATTGTTACTACTTTCTTCAGCTCTCCCTTCTCAGACCAGAGTACGACTTTGCAGACTCGCCAGCCTGTCT  
TTGTGCAACTGCTGCAAGGCGTGTTTCAGGGTTTACCACTGCAACTGGTTAATGCCAAGCCAAAAAGCCTC  
CGTGGAGAGCTGTATTCGGGTGCTGTCTGATGTAGCCAAGAGCCGGGCCATTGCCATTCCCGTGGACCTG  
GACAGCCAAGTCAACAACCTCTTTCTCAAGTCCACAGCATTGTGCAGAAAACAGCCATGAACTGGCGGC  
TCTCAGCCCGCAATGCCGCACGCAGGGACTCTGTTCTGGCAGCTTCCAGAGACTACCGGAATATCATTGA  
GAGATTGCAGGACATCGTCTCCGCGCTGGAGGACCGTCTCAGGCCCTGGTGACGGCAGAGTTATCTGTG  
CTCGTGGATGTTCTCCACAGACCCGAGCTGCTTTTCCAGAGAACACAGACGCCAGAAGGAAATGTGAAA  
GTGGCGGTTTCATTTGCAAGTTAATAAAGCATACAAAACAGCTGCTAGAAGAAAATGAAGAGAAGCTCTG

CATTAAGGTCCTACAGACCCTGAGGGAAATGATGACCAAAGATAGAGGCTATGGAGAAAAGGGTGAGGCG  
CTCAGGCAAGTTCTGGTCAACCGTTACTATGGAAACGTCAGACCTTCGGGACGAAGAGAGAGCCTTACCA  
GCTTTGGCAATGGCCCACTGTCAGCAGGAGGACCCGGCAAGCCCGGGGAGGAGGGGGAGGTTCCGGATC  
CAGCTCTATGAGCAGGGGTGAGATGAGTCTGGCCGAGGTTCAGTGTCACCTTGACAAGGAGGGGGCTTCC  
AATCTAGTTATCGACCTCATCATGAACGCATCCAGTGACCGAGTGTTCCATGAAAGCATTCTCCTGGCCA  
TTGCCCTTCTGGAAGGAGGCAACACCACCATCCAGCACTCCTTTTTCTGTCGCTTGACAGAAGATAAGAA  
GTCAGAGAAATTCTTTAAGGTGTTTTATGACCGGATGAAGGTGGCCAGCAAGAAATCAAAGCAACAGTG  
ACAGTGAACACCAGTGA CTTGGGAAATAAAAAAGAAAGACGATGAGGTAGACAGGGATGCCCCATCACGGA  
AAAAAGCTAAAGAGCCCAACACAGATAACAGAAGAGGTCCGGGATCAGCTCCTGGAGGCCTCCGCTGC  
CACCAGGAAAGCCTTCACCACTTTCAGGAGGGAGGCTGATCCCGACGACCACTACCAGCCTGGAGAGGGC  
ACCCAGGCCACTGCCGACAAGGCCAAGGACGACCTGGAGATGAGCGCGGTCATCACCATCATGCAGCCCA  
TCCTCCGCTTCCTTCAGCTCCTGTGTGAAAACCACAACCGAGACCTGCAGAACTTCCTCCGTTGCCAAAA  
TAACAAGACCAACTACAATTTGGTATGTGAGACCCTGCAGTTTCTGGACTGTATTTGTGGAAGCACAACT  
GGAGGCCTTGGTCTTCTGGGCTTGTATATAAATGAAAAGAATGTAGCGCTTATCAACCAAACCTGGAAA  
GTCTGACCGAATACTGTCAAGGACCTTGCCATGAGAACCAGAACTGCATAGCCACCCATGAATCCAATGG  
CATTGACATCATCACAGCCCTGATCCTCAATGATATCAATCCTTTGGGAAAGAAGAGGATGGACCTTGTG  
TTAGAACTGAAGAACAATGCCTCGAAGTTGCTCCTGGCCATCATGGAAAGCAGGCACGACAGTGAAAACG  
CAGAGAGGATACTTTATAACATGAGGCCCAAGGAACTGGTGGAAGTGATCAAGAAAGCCTACATGCAAGG  
TGAAGTGGAATTTGAGGATGGAGAAAACGGTGAGGATGGGGCGGCGTCCCCAGGAACGTGGGGCACAAAC  
ATCTACATATTAGCCCATCAGTTGGCTCGGCATAACAAAGAACTTCAGAGCATGCTGAAACCTGGTGGCC  
AAGTGGACGGAGATGAAGCCCTGGAGTTTTATGCCAAGCACACGGCGCAGATAGAGATTGTCAGATTAGA  
CCGAACAATGGAACAGATAGTCTTTCCCGTGCCAGCATATGTGAATTCCTAACCAAGGAGTCAAACTA  
CGAATTTACTATACTACAGAGAGAGACGAACAAGGCAGCAAAATCAATGATTTCTTTCTGCGGTCTGAAG  
ACCTCTTCAATGAAATGAATTGGCAGAAGAACTGAGAGCCCAGCCGTGTTGTACTGGTGTGCCCCGAA  
CATGTCTTTCTGGAGCAGCATTCGTTTAACCTGGCCGTCTGATGAACCTGCTGGTGGCGTTTTTCTAC

CCGTTTAAGGGAGTCCGAGGAGGAACCCTGGAGCCCCACTGGTCGGGACTCCTGTGGACAGCCATGCTCA  
TCTCTCTGGCCATCGTCATTGCCCTCCCCAAGCCCCATGGCATCCGGGCCTTAATTGCCTCCACAATTCT  
ACGACTGATATTTTCAGTCGGGTACAAACCCACGTTGTTTCTTCTGGGCGCTTTCAATGTATGCAATAAA  
ATCATCTTTCTAATGAGCTTTGTGGGCAACTGTGGGACATTCACAAGAGGCTACCGAGCCATGGTTCTGG  
ATGTTGAGTTCCTCTATCATTTGTTGTATCTGGTGATCTGTGCCATGGGGCTCTTTGTCCATGAATTCTT  
CTACAGTCTGCTGCTTTTTGATTTAGTGTACAGAGAAGAGACTTTGCTTAATGTCATTAAGGTGTCACT  
CGCAATGGACGGTCCATCATCCTGACAGCAGTTCTGGCTCTGATCCTCGTTTACCTGTTCTCAATAGTGG  
GCTATCTTTTCTTCAAGGATGACTTTATCTTGGAAGTAGATAGGCTGCCCAATGAAACAGCTGTTCCAGA  
AACCGGCGAGAGTTTGGCAAGCGAGTTCCTGTTCTCCGATGTGTGTAGGGTGGAGAGTGGGGAGAACTGC  
TCCTCTCCTGCACCCAGAGAAGAGCTGGTCCCTGCAGAAGAGACGGAACAGGATAAAGAGCACACATGTG  
AGACGCTGCTGATGTGCATTGTCACTGTGCTGAGTCACGGGCTGCGGAGCGGGGTGGAGTAGGAGATGT  
ACTCAGGAAGCCGTCCAAAGAGGAACCCCTGTTTGCTGCTAGAGTTATTTATGACCTCTTGTTCTTCTTC  
ATGGTCATCATCATTGTTCTTAACCTGATTTTTGGGGTTATCATTGACACTTTTGCTGACCTGAGGAGTG  
AGAAGCAGAAGAAGGAAGAGATCTTGAAGACCACGTGCTTTATCTGTGGCTTGGAAGAGACAAGTTTGA  
CAACAAGACTGTCACCTTTGAAGAGCACATCAAGGAAGAACACAACATGTGGCACTATCTGTGCTTCATC  
GTCCTGGTGAAAGTAAAGGACTCCACCGAATATACTGGGCCTGAGAGTTACGTGGCAGAAATGATCAAGG  
AAAGAAACCTTGACTGGTTCCCCAGGATGAGAGCCATGTCATTGGTCAGCAGTGATTCTGAAGGAGAACA  
GAATGAGCTGAGAAACCTGCAGGAGAAGCTGGAGTCCACCATGAACTTGTCACGAACCTTTCTGGCCAG  
CTGTCGGAATTAAAGGATCAGATGACAGAACAAAGGAAGCAGAAACAAAGAATTGGTCTTCTAGGACATC  
CTCCTCACATGAATGTCAACCCACAACAACCAGCATAAGCAAATGAAAGAAAGGAATTGTATTTACCTTT  
TATAATTATTATTAGTGTGGGTATGGCTAATGAGTTCTGATTCACCCACGAAGGTTACATTTATGCTGAA  
TACATTTGTAAATACTCAGTTTTATACTGTATGTATATGATTGCTACTCTAAAGGTTTGGATATATGTAT  
TGTAATTAGAATTGTTGGCATGATGACATTTCAATTTGTGCCAAAAATATTAATAATGCCTTTTTTGAAG  
GACTAACAGAAAGCACCTGATTTGCACTTGAACCAGATTATAGATTTAAAAGTATATGACATGTATTTTG  
TATTTAAACTAGAAATAGCCAGTATTTATGTTTTTATAAACTGTGCAATACGAATTATGCAATCACAA

TACATTTGTAGCTCCCGAGTGTCTAAAGGGAGTGCACCTCTTTGAAGCTGGTGTGTTAATACTATGTAA  
TAAATGGTTAACTTTCAAATGATGCTGCTGCCAAAATTATATTAATAGTGAGTTTCAGGCCCTGGGCAT  
TTTGTACCATGTAATTATCCTCTGGTGATGCTGTTTCTCGTTAGTGGCAGTAGTGCCTCCGTCTCCTAGT  
GATAATGCTCCAAGTCTATGAACTGTAAATCAGCATTCATTTTAAGAAAAGCAACTTTAGTTTCAAAGA  
TACTTTTAAGCTTCTAAATTGATCATTTAACTATTTCTTTAAATAAGAGAGCCAAATTAGAGGCTCATA  
CTTTAGCTTGTGAAGAAGATAATGAATTTTTTAAAGGGAACCTTCTATGCAATGTTTCAGGATAAATGCAT  
ACTGCTGGCCAATCAGTGTCTCTCCTGGGTAAATTTTGATGTCGCATTATAAAGACATGCATAATTGAT  
GGTTTCTAGATTATCTAGTCCAAACAATAGAGTTTATTTTTCTTCATCTGAACCAACATGCTACAGTAG  
CTAAGAAGTATTA AAACTATATACATCCATATAAAGATGAAATATGAACTATCTCATTAGAAGTCATAGT  
TGACCACAGACATGTTATTCTTCTGAAAGAGCCACATTTTGGTTTTATTTCTTGTCACATGATTTCTTTT  
CTTGATGGATGAAAAATATGAAAGGAACTTTTATATCTGTTGCCTAGTTTGTACATGGATCTCATTTT  
ACAAGAGAATCTCTCTGCAAAAAAAAAAAAAACAGTTTAAAAATGCATTGAAAGCAGAGTTCTGAAATGA  
GTAAAGTTTGTAATGCATATATAAAAAATATTTAATAAATGATGCAGAATATACAGTGA

>NM\_004521.3 Homo sapiens kinesin family member 5B (KIF5B), mRNA

GTCGCCCCAACGGCGGCCTCAGGAGTGATCGGGCAGCAGTCGGCCGGCCAGCGGACGGCAGAGCGGGCGGA  
CGGGTAGGCCCCGGCCTGCTCTTCGCGAGGAGGAAGAAGGTGGCCACTCTCCCGGTCCCCAGAACCTCCCC  
AGCCCCCGCAGTCCGCCCAGACCGTAAAGGGGGACGCTGAGGAGCCGCGGACGCTCTCCCGGTGCCGCC  
GCCGCTGCCGCCGCCATGGCTGCCATGATGGATCGGAAGTGAGCATTAGGGTTAACGGCTGCCGGCGCCG  
GCTCTTCAAGTCCCGGCTCCCCGGCCGCCTCCACCCGGGGAAGCGCAGCGCGGCGCAGCTGACTGCTGCC  
TCTCACGGCCCTCGCGACCACAAGCCCTCAGGTCCGGCGCGTTCCCTGCAAGACTGAGCGGCGGGGAGTG  
GCTCCCGGCCGCCGGCCCCGGCTGCGAGAAAGATGGCGGACCTGGCCGAGTGCAACATCAAAGTGATGTG

TCGCTTCAGACCTCTCAACGAGTCTGAAGTGAACCGCGGCGACAAGTACATCGCCAAGTTTCAGGGAGAA  
GACACGGTCGTGATCGCGTCCAAGCCTTATGCATTTGATCGGGTGTTCCAGTCAAGCACATCTCAAGAGC  
AAGTGTATAATGACTGTGCAAAGAAGATTGTTAAAGATGTACTTGAAGGATATAATGGAACAATATTTGC  
ATATGGACAAACATCCTCTGGGAAGACACACACAATGGAGGGTAACTTCATGATCCAGAAGGCATGGGA  
ATTATTCCAAGAATAGTGCAAGATATTTTAAATTATTTACTCCATGGATGAAAATTTGGAATTCATA  
TTAAGGTTTCATATTTTGAAATATATTTGGATAAGATAAGGGACCTGTTAGATGTTTCAAAGACCAACCT  
TTCAGTTCATGAAGACAAAAACCGAGTTCCTATGTAAAGGGGTGCACAGAGCGTTTTGTATGTAGTCCA  
GATGAAGTTATGGATACCATAGATGAAGGAAAATCCAACAGACATGTAGCAGTTACAAATATGAATGAAC  
ATAGCTCTAGGAGTCACAGTATATTTCTTATTAATGTCAAACAAGAGAACACACAAACGGAACAAAAGCT  
GAGTGGAAAACCTTATCTGGTTGATTTAGCTGGTAGTGAAAAGGTTAGTAAAACCTGGAGCTGAAGGTGCT  
GTGCTGGATGAAGCTAAAAACATCAACAAGTCACTTTCTGCTCTTGAAATGTTATTTCTGCTTTGGCTG  
AGGGTAGTACATATGTTCCATATCGAGATAGTAAATGACAAGAATCCTTCAAGATTCATTAGGTGGCAA  
CTGTAGAACCACTATTGTAATTTGCTGCTCTCCATCATCATACAATGAGTCTGAAACAAAATCTACACTC  
TTATTTGGCCAAAGGGCCAAAACAATTAAGAACACAGTTTGTGTCAATGTGGAGTAACTGCAGAACAGT  
GGAAAAAGAAGTATGAAAAAGAAAAAGAAAAAATAAGATCCTGCGGAACACTATTCAGTGGCTTGAAAA  
TGAGCTCAACAGATGGCGTAATGGGGAGACGGTGCCTATTGATGAACAGTTTGACAAAGAGAAAGCCAAC  
TTGGAAGCTTTCACAGTGGATAAAGATATTACTCTTACCAATGATAAACCAGCAACCGCAATTGGAGTTA  
TAGGAAATTTTACTGATGCTGAAAGAAGAAAGTGTGAAGAAGAAATTGCTAAATTATACAAACAGCTTGA  
TGACAAGGATGAAGAAATTAACCAGCAAAGTCAACTGGTAGAGAACTGAAGACGCAAATGTTGGATCAG  
GAGGAGCTTTTGGCATCTACCAGAAGGGATCAAGACAATATGCAAGCTGAGCTGAATCGCCTTCAAGCAG  
AAAATGATGCCTCTAAAGAAGAAGTGAAAGAAGTTTTACAGGCCCTAGAAGAAGTTGCTGTCAATTATGA  
TCAGAAGTCTCAGGAAGTTGAAGACAAAATAAGGAATATGAATTGCTTAGTGATGAATTGAATCAGAAA  
TCGGCAACTTTAGCGAGTATAGATGCTGAGCTTCAGAACTTAAGGAAATGACCAACCACCAGAAAAAAC  
GAGCAGCTGAGATGATGGCATCTTTACTAAAAGACCTTGACAGAAATAGGAATTGCTGTGGGAAATAATGA  
TGTAAGCAGCCTGAGGGAAGTGGCATGATAGATGAAGAGTTCACTGTTGCAAGACTCTACATTAGCAAA

ATGAAGTCAGAAGTAAAAACCATGGTGAAACGTTGCAAGCAGTTAGAAAGCACACAACTGAGAGCAACA  
AAAAAATGGAAGAAAATGAAAAGGAGTTAGCAGCATGTCAGCTTCGTATCTCTCAACATGAAGCCAAAAT  
CAAGTCATTGACTGAATACCTTCAAAATGTGGAACAAAAGAAAAGACAGTTGGAGGAATCTGTGATGCC  
CTCAGTGAAGAACTAGTCCAGCTTCGAGCACAAAGAGAAAAGTCCATGAAATGGAAAAGGAGCACTTAAATA  
AGGTTCCAGACTGCAAATGAAGTTAAGCAAGCTGTTGAACAGCAGATCCAGAGCCATAGAGAACTCATCA  
AAACAGATCAGTAGTTTGAGAGATGAAGTAGAAGCAAAAGCAAACTTATTACTGATCTTCAAGACCAA  
AACCAGAAAATGATGTTAGAGCAGGAACGTCTAAGAGTAGAACATGAGAAGTTGAAAGCCACAGATCAGG  
AAAAGAGCAGAAAACCTACATGAACTTACGGTTATGCAAGATAGACGAGAACAAGCAAGACAAGACTTGAA  
GGGTTTGGAAGAGACAGTGGCAAAAGAACTTCAGACTTTACACAACCTGCGCAAACTCTTTGTTCAGGAC  
CTGGCTACAAGAGTTAAAAAGAGTGCTGAGATTGATTCTGATGACACCGGAGGCAGCGCTGCTCAGAAGC  
AAAAAATCTCCTTTCTTGAAAATAATCTTGAACAGCTCACTAAAGTGCACAAACAGTTGGTACGTGATAA  
TGCAGATCTCCGCTGTGAACTTCCTAAGTTGGAAAAGCGACTTCGAGCTACAGCTGAGAGAGTGAAAGCT  
TTGGAATCAGCACTGAAAGAAGCTAAAGAAAATGCATCTCGTGATCGAAACGCTATCAGCAAGAAGTAG  
ATCGCATAAAGGAAGCAGTCAGGTCAAAGAATATGGCCAGAAGAGGGCATTCTGCACAGATTGCTAAACC  
TATTCGTCCCGGGCAACATCCAGCAGCTTCTCCAACCTCACCAAGTGCAATTCGTGGAGGAGGTGCATTT  
GTTCAGAACAGCCAGCCAGTGGCAGTGCGAGGTGGAGGAGGCAAACAAGTGTAATCGTTTATACATACCC  
ACAGGTGTTAAAAAGTAATCGAAGTACGAAGAGGACATGGTATCAAGCAGTCATTCAATGACTATAACCT  
CTACTCCCTTGGGATTGTAGAATTATAACTTTTAAAAAAAATGTATAAATTATACCTGGCCTGTACAGCT  
GTTTCCTACCTACTCTTCTTGAAACTCTGCTGCTTCCAACACAACCTAGAGTGCAATTTTGGCATCTTA  
GGAGGGAAAAAGGACAGTTTACAACCTGTGGCCCTATTTATTACACAGTTTGTCTATCGTGTCTTAAATTT  
AGTCTTTACTGTGCCAAGCTAACTGTACCTTATAGGACTGTACTTTTTGTATTTTTGTGTATGTTTATT  
TTTTAATCTCAGTTTAAATTACCTAGCTGCTACTGCTTCTTGTTTTCTTTTCTATTAAACGTCTTCC  
TTTTTTTTTCTTAAGAGAAAATGGAACATTTAGGTTAAATGTCTTTAAATTTTACCACTTAACAACCTA  
CATGCCCATAAAATATATCCAGTCAGTACTGTATTTTAAATCCCTTGAAATGATGATATCAGGGTTAAA  
ATTACTTGATTGTTTCTGAAGTTTGCTCCTGAAAACCTACTGTTTGAGCACTGAAACGTTACAAATGCCT

AATAGGCATTTGAGACTGAGCAAGGCTACTTGTTATCTCATGAAATGCCTGTTGCCGAGTTATTTTGAAT  
AGAAATATTTTAAAGTATCAAAAGCAGATCTTAGTTAAGGGAGTTTGGAAAAGGAATTATATTTCTCTT  
TTTCCTGATTCTGTACTCAACAAGTCTTGATGGAATTAATACTCTGCTTTATTCTGGTGAGCCTGCTA  
GCTAATATAAGTATTGGACAGGTAATAATTTGTCATCTTTAATATTAGTAAAATGAATTAAGATATTATA  
GGATTAAACATAATTTTATACGGTTAGTACTTTATTGGCCGACCTAAATTTATAGCGTGTGGAAATTGAG  
AAAAATGAAGAAACAGGACAGATATATGATGAATTAATAATATATATAGGTCAATTTTGGTCTGAAATCC  
CTGAGGTGTTTTAACCTGCTACACTAATTTGTACACTAATTTATTTCTTTAGTCTAGAAATAGTAAATT  
GTTTGCAAGTCACTAATAATCATTAGATAAATTATTTTCTTGGCCATAGCCGATAATTTTGTAAATCAGTA  
CTAAGTGTATACGTATTTTTGCCACTTTTTCTCAGATGATTAAAGTAAGTCAACAGCTTATTTTAGGAA  
ACTGTAAAAGTAATAGGGAAAGAGATTTCACTATTTGCTTCATCAGTGGTAGGGGGGCGGTGACTGCAAC  
TGTGTTAGCAGAAATTCACAGAGAATGGGGATTTAAGGTTAGCAGAGAACTTGGAAAGTTCTGTGTTAG  
GATCTTGCTGGCAGAATTAACTTTTGCAAAAGTTTTATACACAGATATTTGTATTAAATTTGGAGCCAT  
AGTCAGAAGACTCAGATCATAATTGGCTTATTTTTCTATTTCCGTAACATTGTAAATTTCCACTTTTGTA  
ATAATTTTGATTTAAATATAAATTTATTTATTTATTTTTTAATAGTCAAAAATCTTTGCTGTTGTAGT  
CTGCAACCTCTAAATGATTGTGTTGCTTTTAGGATTGATCAGAAGAAACACTCCAAAAATTGAGATGAA  
ATGTTGGTGCAGCCAGTTATAAGTAATATAGTTAACAAGCAAAAAAAGTGCTGCCACCTTTTATGATGAT  
TTTCTAAATGGAGAAACATTTGGCTGCATCCACATAGACCTTTATGTTTTGTTTTCAGTTGAAAACCTGC  
CTCCTTTGGCAACATTCGTAAATGAAGCAGAATTTTTTTTTCTCTTTTTTCCAAATATGTTAGTTTTGTT  
CTTGTAAGATGTATCATGGGTATTGGTGCTGTGTAATGAACAACGAATTTTAATTAGCATGTGGTTCAGA  
ATATACAATGTTAGGTTTTTAAAAAGTATCTTGATGGTCTTTTCTATTTATAATTTAGACTTTTCATAA  
AGTGACCAAGAATTTTCATAAATTTGTTTTAGTGAACTGCTTTTTGCTATGGTAGGTCATTAAACACAG  
CACTTACTCTTAAAAATGAAAATTTCTGATCATCTAGGATATTGACACATTTCAATTTGCAGTGTCTTTT  
TGAAGTGGATATATTAACGTTCTCTGAATGGCATTGATAGATGGTTCAGAAAGAGAACTCAATGAAATAA  
AGAGAATATTTATTCATGGCGATTAATTAATTTATTTGCCTAACTTAAGAAAACACTGTGCGTAACTCT  
CAGTTTGTGCTTAACTCCATTTGACATGAGGTGACAGAAGAGAGTCTGAGTCTACCTGTGGAATATGTTG

GTTTATTTTCAGTGCTTGAAGATACATTACAAATACTTGGTTTGGGAAGACACCGTTTAATTTAAGTT  
AACTTGCATGTTGTAAATGCGTTTTATGTTTAAATAAAGAGGAAAAATTTTTGAAA

>NM\_017644.3 Homo sapiens kelch like family member 24 (KLHL24), transcript variant 7, mRNA

GTTGTGAGCTGCGGCAGAGACTGGTGGCTGGAGGAGACGCCGGCGCTGGAGAGTGCGCTGCGCCGCCCCG  
CGCTGAGGGACCGCGGGGTTAGCCACTGCTGGCTGCTTCCAGTGTTGCGCGAGAGGTACCGGGGGTGACA  
GCTCCGGGACCGGCCGAAAGGCGAGGAACCGGTGTGGAAATTTAAAGAACACACATATTTTGAAGTGGGC  
TTTGATCAACCAAATGCTAAAAAGCCACATAAAGAAGATCCCTAATAGTCATTCTCAACAATTATATAG  
TCAACTGATGTAACAATGGTACTAATATTGGGACGCAGACTAAACAGAGAGGATCTTGGGGTGCGTGATT  
CCCCAGCAACTAAGCGAAAAGTTTTTGAAATGGACCCCAAATCTCTGACAGGTCATGAGTTTTTGAAGT  
CTCTTCAGGATCATCCCATGCCGAAAACATACTCCAGATATTTAATGAATTCGTGATAGCCGCTTATTC  
ACAGATGTTATCATTTGTGTGGAAGGAAAAGAATTCCTTGCCATAGAGCTGTGCTCTCAGCCTGTAGCA  
GCTACTTCAGAGCTATGTTTTGTAATGACCACAGGGAAAGCCGAGAAATGTTGGTTGAGATCAATGGTAT  
TTTAGCTGAAGCTATGGAATGTTTTTGCAGTATGTTTATACTGGAAAGGTGAAGATCACTACAGAGAAT  
GTACAGTATCTCTTTGAGACATCAAGCCTCTTTCAGATTAGTGTTCTCCGTGATGCATGTGCCAAGTTCT  
TGGAGGAGCAACTTGATCCTTGTAATTGCTTAGGAATCCAGCGCTTGCTGATACCCATTCACTCAAAAC  
ACTCTTCACAAAATGCAAAAATTTTGC GTTACAGACTTTTGAGGATGTATCCAGCACGAAGAATTTCTT  
GAGCTTGACAAAGATGAACTTATTGATTATTTGTAGTGATGAACTTGTTATTGGTAAAGAGGAGATGG  
TTTTTGAAGCCGTCATGCGTTGGGTCTATCGTGCCGTTGATCTGAGAAGACCACTGTTACACGAGCTCCT  
GACACATGTGAGACTCCCTCTGTTGCATCCCACTACTTTGTTCAAACAGTTGAAGTGGACCAATTGATC  
CAGAATTCTCCTGAGTGTTATCAGTTGTTGCATGAAGCAAGACGGTACCACATACTTGGGAATGAAATGA  
TGTCCCCAAGGACTAGGCCACGCAGGTCCACTGGCTATTCTGAGGTGATAGTTGTCGTTGGAGGATGTGA

GCGAGTTGGAGGATTTAATCTTCCATACACTGAGTGCTACGATCCTGTAACAGGAGAATGGAAGTCTTTG  
GCTAAGCTTCCAGAATTTACCAAATCAGAGTATGCAGTCTGTGCTCTAAGGAATGACATTCTTGTTTCAG  
GTGGAAGAATCAACAGCCGTGATGTCTGGATTTATAACTCACAGTTAAATATTTGGATCAGAGTTGCCTC  
TCTCAATAAAGGCAGATGGCGTCACAAAATGGCTGTCTCCTTGGTAAAGTATATGTTGTCGGTGGCTAT  
GATGGGCAAAACAGACTTAGCAGCGTAGAATGTTATGATTCCTTTTCAAATCGATGGACTGAAGTTGCTC  
CCCTTAAGGAAGCCGTGAGTTCTCCTGCAGTGACTAGCTGTGTAGGCAAACCTGTTTGTGATTGGTGGAGG  
ACCTGATGATAATACTTGTTCTGATAAGGTTCAATCTTATGATCCAGAAACCAATTCTTGGCTACTTCGT  
GCAGCTATCCCAATTGCCAAAAGGTGTATAACAGCTGTATCCCTAAACAACCTGATCTATGTTGCCGGTG  
GACTGACCAAGGCAATATACTGTTACGATCCAGTTGAAGATTACTGGATGCACGTACAGAATACATTCAG  
CCGTCAGGAAAACCTGTGGTATGTCTGTGTGTAATGGTAAAATATATATCCTGGGCGGAAGACGGGAAAAT  
GGAGAAGCCACAGACACTATTCTCTGTTATGATCCTGCAACAAGTATCATCACAGGGGTAGCTGCAATGC  
CCAGGCCAGTGTCTATCATGGCTGTGTGACTATTCATAGATACAATGAGAAATGCTTTAAACTCTGAAG  
ACAGGATACCTCACCGAAGAAGCCACACTGATCCAAGATGGGAGGTTTTAAAAACTCTACAGTGGGAACT  
TCACATATCTCCTTTGTGCCATATGCAAAAAATAGTAAAAATAATAATTTGGTGCCTTTCTCCTCAAAAT  
ATCAATCTTTCAAACTATAATAAAGCCTTTCCTATAATTGAAAAAAAAAACTTTTTTGTTAAAGGTAATG  
GTGGTTGTTACTTGGCCTTTGAAGAGTGACCTTTGTAAGTATTTGTAAGAAGTCTATGTGAATTAGGAA  
ATGTCTGTCTGCATACCTTTTAGGAGCGTGTGAATGGTGTCTTCACTTATTATGTATGTTTATCTGTATG  
TATATTCCTTATTTTGTATATATGTAGAGAAAATTGCATGACTTGAGGCATCATTTAGGTTGAAGAAGT  
TAATGCTTAGGATGCATTCTAGGAGAAAAAATCAGTTTTAAAAACCTTTGTTGTTAACAAAGTATATCCA  
GATTGGTTAATTTTATTGAAGGGTTTTTTCTGTAATTGATAAAAATGTAATGACAACAATTCAGGCATC  
ATAAAATACTGAACATTGTGACTTTATTCTTAGAATTGCTGTCTTACATTAAACATGTTTTTAGGGGGA  
AGTTAGGTAGGAGATAGAAAAATAAGTGCCCCTACAAGGGGGATTAAAATTACAAGTTAATTCCTAAGAG  
AAAAATGGAATGGCCTTTGAAGGAAAAATGACCCACTATGGCTCTCAAAGTTTTTATGCATCATCTCTTC  
AATCCTCTAAGAAAGCCTCTTTTCTTAACCTTGATAAAGCAGTGGAACCCATTTTGCAATATTGTTTTGT  
GAAAAACAGGGACAGACAGCCAGGTACAGAGACTCACACCTGTACTCCCACTACTCAGCAGGCTGGGGC

AGGAGGATTGCTTGAGCCCAGGAGTCTGAGGCTACAGTGAGCTATGAACGCACACGGCACCCCTAGCCTGG  
GCAACAGGTTGCGACACTGTCTCAAGAGAAAAGAAAAAGAAAAATAGGGATAGGTTTTCTTCCTAGCCC  
AGTAGAGTTTGACCTCATTAGTATGGTGCTTTGGGTGAGGACCTCTTCCTTGATTATCCCACTTTCTAGT  
GAACAGCTAAAATTCCTGAGAGTCTCTACTGTAAAGGTACCTTTAATAGGATAAAGCAGGGACCACCTAT  
CTCAGTGGGTCCATTTTTCTTTTAAATTAGTTATCTGAAAAAACTTAGCAGTAGTCCCATCTTTAAGG  
TAAGTCTTTCATTTGGTCCCCATTGTGTAAAATACTAATCAACATTTTCAAGCTTCTGTACAACAGACTG  
CTTTGTCTAGATTTCTCAACTCCACTTTATAAAGCTTATCAGTTTTCAGAGAGGAATGTGAATTTTTTT  
TCTAATGCAAATAAATGGATATGGCAGGAACTACAGCATAAGTGATTATTGTGATTCTGGGTGGACGGAT  
ATAATTTACAACATTTAGGGATGTTCTAGGTAGCCTGCTGTAGTTTGACTTCCAGTCACTGTTGTCTTTC  
ACATTATAATTTGTATATTTCTTGTGATAGAAGGGATGATGCAAATATGTAATTAAGTGTCACCAGATT  
TCTGTAAAAACCAAGGTTGAAATAAAAAGCCTAACATTGGTAAGCTACATTGTTTTCTATTTTAGAATG  
ATTCAGAGATTTAGATAGACATTTTTTAACTTTAATGCTTAGCTAGAATCTACATTCTGAGGAAAAC  
CTAAAAAACTTAAAAATTTTTAGGGAATTTTTATTTTTCAAATCATAATTTTAAATGATAGATACCATT  
TTGTGATAACAACAATTCAGAAAACAATTTCTATCCTCTTAGTTGAAAGAATGTAGGTACAGTTTGGAT  
ACTTGTAATTTAATTTTAGAGTAAACATCTGCATTATACTCTTATAGATAATAGAATTATTTAGTTAAGA  
AATTCCTTACAGTAAATGAGATAATGTGTGAAAAAGTATTTGTAAATGCTGAGGATTCTACAAATGATA  
GTTGTTATTTTCATGTGTATTTGTAAGATCATGTCCATTTTCATGAATATAGGACTTCACATAAAAAAAGA  
CTTCTCAAGACAACCTTTATATTCTAGTATTTTTCTGTTGTAAAAAGTATTAACCTATTACTTTTATTTT  
GTTATACATTTATTTTAATATCCATGTGTTTATTATAGTAAATTTGAAATGAAATCCTGAAAAACAGAAT  
TTTTTTAAACACAGACCTCACACCAATATTAATTTTTCTCTACATAATTTAAACTACATAAATTAAGT  
ACTTAAATTTATATTGAAGGCCACCAAGAACTTAGGTTGAATCTTAGAAAAATTTAATAACTATTTTAA  
AAGTTACCCAACCTAATATTTTAATTTTTTAATTTTATCTTCCTTTACTAATTCTTGATAAATAATAGC  
ATTAGACTTGATAAAATAAAAAAGAATTTTAGAGTAGAATTAATATATCAAAAGGGGTATATCAACCAA  
TTGGTGTCAGATTGTATTCATTCTCTCATCACATAAAGATTTTTCTTTTGATAGGTGATGCTCATATGAA  
CCTTTGGTTTAGAATCTATATATGTACATGTGTATGTATGTAGATAGTATGGTTGTATACACACATATAT

ACCAAACACCATGAATTTTAGCAGTCTGTGATGATCAGCAAAAAAGCACATAAAGTAAAAATTAGTTGAC  
CATGCTAAATTCAATTCTGGAATTTTTTTTTTATTTGGGCATTTCTAGAACTTTTACATTTGAAAGTACA  
TGATGAGTATTAGTAACGATGACTTATGTATAATCAGAATCTTTATGACAATTTAGTTTTACAAGGTCAG  
AAGAGATGAGTTTGCTAAACCCAGCTGTGATACCTCAGTTGGAAAGGGAATTCAAAGGTATGCTTTGTAG  
AACAGAAAAGTATAGTTTTTTTTTTCATGAACTTTAATCATTTTCTGTTTTTCCTCTATGTGAGTCAGCTA  
CAAAAGTGGTCTAATTTTTTACAACAGTAGAACTTCCTCCTTTTCTACTGTAATCTTCCCACTGACTTTAC  
TGCACAGGTATGAAATACTAGTGTATTGGATCTTCAGTAACCTTTTTATTTCTAGATGATTGAAATATA  
GGTATTTACTCCATTTAAACCAGGTGATAAGATGATGTAAATACTCAGGGAGGGTATTAACCTGTTACTT  
TTGCTCGTTTGGGGTGTAAGTGCCATGACTGAATAATCTCAATTCATGATTCTAGAGTAAGTTTAATT  
TGGAAAAAGGGGCTTCACACATGGTGGTGGTTGAACATTGATTCTTTTATACTTAAAAAGATGAAAATGT  
TTTGTGGACTGATACATTTTATCTTACTGAATATGAATTGTTTATGTATCTCTACTGTCAAATAGCCTTT  
TTGAAACTCAGGAAAGACAAAGGTTCAATTACACCACTTTTGTCAATAAGCAAACCAGGTATTTTTTTTT  
TCTCCTGTTGTCTGGATATGGCAATAGATTTTTTAAATTGCTGTGAGAACCCATATATGAAAAGAGAGGA  
GTTGAATTGTGTGTGCCTTTTATGTCTTGAGATTTATATGTGGAAAAGACGACATCTACTTCAAACCTGTA  
TTTTTTTCGTTTTTTTTTTTTTTTTGGGGAAGGGGGGAGAACGGGGTCTTGCTCTGTCGCCCAGGCTGGAG  
TGCAGTGGCGGATCTCAGCTGACTGCAACCTCCACCTCCCGGGTTCAAGGGATTCTGCCTCAGCCTCCC  
GAGTAGCTGAGACCACAGGTGCGTGCCACCACACCCGGCTAATTTTTTTGTATTTTATAGTAGAGACGGGG  
TTTAGTAGAGACGGATCACTCCTGACCACGTGATCCGCCACCTCGGCCTCCCAAAGTGCTGGGATTACA  
GGCGTGAGCCACCACCCCGGCCTGTATTTTCAGAGAGGAGAGCTTGGTGTTTTTGTGGTGCCAAGTGGT  
AAGATAATGTCTCTTTGAGGCTTCCTATGGACTGCCTTTATTTTAGTAAACTCAAGACACCAGTTAACCT  
CAACAGAGTTTTGGCCTTATTAGAATTTGTTGTGCATCTTATTGAAAGCCAGGTTTACATCACCTCACCC  
CATTATTCTTTTATGTTAAATAAATTTACCATGCCAAGTAACCAGAATGGAGCAAATTGGTTGATCTTTA  
AGGCAGTAGGTTTGACTAGCTAGCTATCATTATTGTCACATCTAATGCTAGGCACCAGAAACCATTTGAG  
CCAGGAGTGTGAATGAATAATTCCAGAGACACTTTAGACATTTTTTAATGTTTTATATGAACATTTTACA  
TTTGTGTGATTGCCTTAGATATTAAATTTTCTAGTGCTGATAAAAACAGCAACATTCATAACTTATTTT

ATATATTGTTCCAAAGAAAAGAATTTGTTTTAATGGTTTCAAATAACTGCACCTGAATTTGTTTATGTG  
CCTTAAGTTCTCTAGTGCTATTTCAACTTTTTTTTCAATCTAAATGAAGCTTACCTTAGATAAGGTTTCA  
ATTTGTTTCCTATAGAGTAAATAAACTTCCCCTTCTTAAATTGTGTAATAAGCACCAACGTGTGGTTGCT  
TGGCAGAATGAGAATGTTAAGGGAGATTGTTGGATGTTTGGAGTTTCATTATATTTTTGTTTTATTTT  
TTGATACCTAGGTGCTTTTTAAAATATTCAGACAAATATCTATCTTACATTGATTAAACCCGTGTAAATT  
CATTTGCAGTATCTACATCGAATGTCAAAAAAGTATACTTATTTTTGTTCCATACTTATGTACAATTTTT  
TCCCTCTTCAGGCTTTTTCATTTACCTTTTTGAAAAAGCACTTACTCTCCCCTTCCCTATCACCCCTCCC  
CCAAGGTTTCTTTATTTAAATTTTTATTGAGAGTTGTTGGAGCTCTAAGACAATACAAATTTAGAGTTGA  
ACAAAAGTATAATCTGCTTTACAACCTAGTATAGACCTAAGGTCATTTGCTTTCAATTAGAGGCTCCAGAG  
TCTTCATAGTGGAAGAATGCTTTGTATTTAATTGTTCTTAGTTAAGTTGTAGCACGTGAATACTTACTT  
ACATGTTTTGTTTAAATATACTTCTTGCATAGTTTAATTTTTTAAAAGTTGTATCTAATAAAATGTCTTT  
TAACCATTATTACTTGACTATATGGTTGTATTAATTTTGTTCACGAAAA

>NM\_005561.4 Homo sapiens lysosomal associated membrane protein 1 (LAMP1), mRNA

ACGTGACAAGCGCTGCCGGCCGCGGTGTCTTCTTCGTGCCGGCGTCGCAGTGGCCGGGCCTCTTGCGTCT  
GGTAACGCCGCTGTCTCTAACGCCAGCCCTTGGCGCCCGCGCCCCGCCACCGCAGCGCCCGGCAGTCCGC  
GGCCCAACCGCCGCGCCCGCGCCCCGCTCCCCGCACCGTACCCGGCCGCTCGCGCCATGGCGGCCCCCGG  
CAGCGCCCGGCGACCCCTGCTGCTGCTACTGCTGTTGCTGCTGCTCGGCCTCATGCATTGTGCGTCAGCA  
GCAATGTTTATGGTGAAAAATGGCAACGGGACCGCGTGCATAATGGCCAACTTCTCTGCTGCCTTCTCAG  
TGAACTACGACACCAAGAGTGGCCCTAAGAACATGACCTTTGACCTGCCATCAGATGCCACAGTGGTGCT  
CAACCGCAGCTCCTGTGGAAAAGAGAACACTTCTGACCCAGTCTCGTGATTGCTTTTGGAAGAGGACAT  
ACACTCACTCTCAATTTACGAGAAATGCAACACGTTACAGCGTCCAGCTCATGAGTTTTGTTTATAACT

TGTCAGACACACACCTTTTCCCCAATGCGAGCTCCAAAGAAATCAAGACTGTGGAATCTATAACTGACAT  
CAGGGCAGATATAGATAAAAAATACAGATGTGTTAGTGGCACCCAGGTCCACATGAACAACGTGACCGTA  
ACGCTCCATGATGCCACCATCCAGGCGTACCTTTCCAACAGCAGCTTCAGCCGGGGAGAGACACGCTGTG  
AACAAGACAGGCCTTCCCCAACCACAGCGCCCCCTGCGCCACCCAGCCCCTCGCCCTCACCCGTGCCAA  
GAGCCCCTCTGTGGACAAGTACAACGTGAGCGGCACCAACGGGACCTGCCTGCTGGCCAGCATGGGGCTG  
CAGCTGAACCTCACCTATGAGAGGAAGGACAACACGACGGTGACAAGGCTTCTCAACATCAACCCCAACA  
AGACCTCGGCCAGCGGGAGCTGCGGCGCCACCTGGTGACTCTGGAGCTGCACAGCGAGGGCACCACCGT  
CCTGCTCTTCCAGTTCGGGATGAATGCAAGTTCTAGCCGGTTTTTCTACAAGGAATCCAGTTGAATACA  
ATTCTTCCTGACGCCAGAGACCCTGCCTTTAAAGCTGCCAACGGCTCCCTGCGAGCGCTGCAGGCCACAG  
TCGGCAATTCTACAAGTGCAACGCGGAGGAGCACGTCCGTGTCACGAAGGCGTTTTTCAGTCAATATATT  
CAAAGTGTGGGTCCAGGCTTTCAAGGTGGAAGGTGGCCAGTTTGGCTCTGTGGAGGAGTGTCTGCTGGAC  
GAGAACAGCATGCTGATCCCCATCGCTGTGGGTGGTGCCCTGGCGGGGCTGGTCCTCATCGTCCTCATCG  
CCTACCTCGTCGGCAGGAAGAGGAGTCACGCAGGCTACCAGACTATCTAGCCTGGTGACGCAGGCACAG  
CAGCTGCAGGGGCCTCTGTTCTTTCTCTGGGCTTAGGGTCCTGTCTGAAGGGGAGGCACACTTTCTGGCA  
AACGTTTCTCAAATCTGCTTCATCCAATGTGAAGTTCATCTTGACGATTTACTATGCACAACAGAGTAA  
CTATCGAAATGACGGTGTTAATTTTGCTAACTGGGTAAATATTTTGCTAACTGGTTAAACATTAATATT  
TACCAAAGTAGGATTTTGAGGGTGGGGGTGCTCTCTCTGAGGGGGTGGGGGTGCCGCTGTCTCTGAGGGG  
TGGGGGTGCCGCTGTCTCTGAGGGGTGGGGGTGCCGCTCTCTCTGAGGGGGTGGGGGTGCCGCTTCTCT  
GAGGGGGTGGGGGTGCCGCTCTCTCTGAGGGGGTGGGGGTGCTGCTCTCTCCGAGGGGTGGAATGCCGCT  
GTCTCTGAGGGGTGGGGGTGCCGCTCTAAATTGGCTCCATATCATTTGAGTTTAGGGTTCTGGTGTTTGG  
TTTCTTCATTCTTTACTGCACTCAGATTTAAGCCTTACAAAGGGAAAGCCTCTGGCCGTACACGTAGGA  
CGCATGAAGGTCACTCGTGGTGAGGCTGACATGCTCACACATTACAACAGTAGAGAGGGAACATCCTAAG  
ACAGAGGAACTCCAGAGATGAGTGTCTGGAGCGCTTCAGTTCAGCTTTAAAGGCCAGGACGGGCCACACG  
TGGCTGGCGGCCTCGTTCCAGTGGCGGCACGTCTTGGGCGTCTCTAATGTCTGCAGCTCAAGGGCTGGC  
ACTTTTTTAAATATAAAAATGGGTGTTATTTTTATTTTTATTTGTAAAGTGATTTTTGGTCTTCTGTTGA

CATTCGGGGTGATCCTGTTCTGCGCTGTGTACAATGTGAGATCGGTGCGTTCTCCTGATGTTTTGCCGTG  
GCTTGGGGATTGTACACGGGACCAGCTCACGTAATGCATTGCCTGTAACAATGTAATAAAAAGCCTCTTT  
CTTTTTGGGGTGGGCCTTGTCTTCTGTCTGAGCTAAAATGGGAGCTCATGAGAGAAGGACGTCAGGGAAAC  
GGGGTTGAGGGTGGTCTCGGTGCAGAGAGAAGGGTGTGAGGGAAACGGGGGGTGAGGGTGGTCTTGGTGC  
CAGACGTAGGGAATGGTGTGGGAGTGGCCCGAGTGCCTGGCACAGTTGTCTGGTTCATTCATGTAACAT  
GATAATTTTTAAATCATTAATAAAAAATTACCTTTCATACAGA

>NM\_001122606.1 Homo sapiens lysosomal associated membrane protein 2 (LAMP2), transcript variant C, mRNA

AAGAAAGAGCCCCGCCCTAGTCTTATGACTCGCACTGAAGCGCCGATTCTGGCTTTTGCAAGGCTGTG  
GTCGGTGGTCATCAGTGCTCTTGACCCAGGTCCAGCGAGCCTTTCCCTGGTGTGTCAGCTGTTGTTGTA  
CCGCCGCCGTGCGCCGCCGTGCGCCGCTGCTCTGCGGGGTGTCATGGTGTGCTTCCGCTCTTCCCGTTCCG  
GGCTCAGGGCTCGTTCTGGTCTGCCTAGTCCTGGGAGCTGTGCGGTCTTATGCATTGGAACCTAATTGTA  
CAGATTCAGAAAATGCCACTTGCCCTTATGCAAAATGGCAGATGAATTCACAGTACGCTATGAAACTAC  
AAATAAACTTATAAACTGTAACCATTTAGACCATGGCACTGTGACATATAATGGAAGCATTGTGGG  
GATGATCAGAATGGTCCCAAAATAGCAGTGCAGTTCGGACCTGGCTTTTCTGGATTGCGAATTTTACCA  
AGGCAGCATCTACTTATTCAATTGACAGCGTCTCATTTTCTACAACACTGGTGATAACACAACATTTCC  
TGATGCTGAAGATAAAGGAATTCTTACTGTTGATGAACTTTGGCCATCAGAATTCCATTGAATGACCTT  
TTTAGATGCAATAGTTTATCAACTTTGGAAAAGAATGATGTTGTCCAACACTACTGGGATGTTCTTGTAC  
AAGCTTTTGTCCAAAATGGCACAGTGAGCACAAATGAGTTCCTGTGTGATAAAGACAAAACCTCAACAGT  
GGCACCCACCATACACCACTGTGCCATCTCCTACTACAACACCTACTCCAAAGGAAAAACCAGAAGCT  
GGAACCTATTCAGTTAATAATGGCAATGATACTTGTCTGCTGGCTACCATGGGGCTGCAGCTGAACATCA  
CTCAGGATAAGGTTGCTTCAGTTATTAACATCAACCCCAATACAACCTCACTCCACAGGCAGCTGCCGTTT  
TCACACTGCTCTACTTAGACTCAATAGCAGCACCATTAAAGTATCTAGACTTTGTCTTGTGTGAAAAAT  
GAAAACCGATTTTATCTGAAGGAAGTGAACATCAGCATGTATTTGGTTAATGGCTCCGTTTTTCAGCATTG

CAAATAACAATCTCAGCTACTGGGATGCCCCCTGGGAAGTTCTTATATGTGCAACAAAGAGCAGACTGT  
TTCAGTGTCTGGAGCATTTAGATAAAATACCTTTGATCTAAGGGTTCAGCCTTTCAATGTGACACAAGGA  
AAGTATTCTACAGCTGAAGAATGTTCTGCTGACTCTGACCTCAACTTTCTTATTCCTGTTGCAGTGGGTG  
TGGCCTTGGGCTTCCTTATAATTGTTGTCTTTATCTCTTATATGATTGGAAGAAGGAAAAGTCGACTGG  
TTATCAGTCTGTGTAATCAGTTAAATCTAGTGTTTGTGTTGTTTTTTCAATTAGAAGTTACGTTTCCATT  
GGCTAAAAGCCAGGACATGCTGTGCAATAGATTGTTTAAGATATGCAGACTAACTTCAGTGAGTTCCTAG  
CTAACTTGGGCATGAGTACACTTATTTAAGACAAAATATATTAGGACCAATTTTTTTCTGTTTTTTTTCT  
TCCTTTGTTAAAGTATAATTAAGAAAAAATTGTGGCTTAGAATTTTTTAAGTAAATAATGATTTTAAGC  
CCCTGGATCCAATTATGAAAGCATTTTTGCTGATGTGTAATTTATATGTTACAGTTACTTATATTTTAC  
TACTTTGATGTTATTTGCAAAATCAAAGGTGTTAAAGAATTTAACTTGCTTCAGGAAATAAATTCAAGAA  
CATAGTGGATTCATTTTATTGGTGGCAGACACGAAATTTGGTTCATGATAAGACTTCCTTTCCCCACCT  
CCTGATCAGCATTATTTAAATCTGTATTTTTCTGTTAGTTAAGAAAGAAATGGCTTCATGATATTGTATT  
TAATAGCAAAAGTTTGGCTGTCTTCTTCACTGTTAATAGCTACTATATTTTAACAAGGAGATTCTT  
TTTTGTTGTTGTTGTTCTAGAGTTTGAATATACTGATTATCTCAGACTTGACATTTATACTGAAGGAT  
GAAGTAAGACCTCCAGCTTTTTTTAAAAAAGGTGTTGATTTGGAACACCTGTATGGGTTATGGTTTATTA  
AGGTTATGGTTTAGAAAGTTTTTTCCCTCAGAGCCTTAAGTTGTTAAGAAGGTTCAATTTATCCTGCACT  
GAAAACAAAACTCTATATACTTTGTTTGTGTGCCTCCTGCACTCTCCCATTCCTATGTGAATATGCTC  
TAGTTGATATTTTAAATATATTGATTTCTTTTTCTCACAGCAACAAGTGCTTACTCTAGAGGTTAGTGG  
GCCCTGATATGTCATCAGTCAGATGCCTGCCTAGCCAAAGCTGGACTAAGATTATTCTGTACATTTGTTG  
ATCTTGATATAGACTTATATCCCTGTAGGGACTGCTAATGGCTCCGGCTTCTGGAGTAAGGTACTGGAGA  
CCACTCATCCCTGTGTCTGCTTGATTGGTTCAGCTGTTGAATTGCCCTTTATTTGGAAGCAGTGTTGAA  
GTTGTCTAGGGTTCAAATGGCTGCTTTGTACACCTGTCATTAGTATAAGGCAGATGTTTATTTTATCAAG  
CTATTTTATCTCTACATTTAACTAAAAACAAAAGTTCCCAAAGATCTGCCTTCACTTCAGAAATTTTTTT  
TGGATTAAAAAATTAAGCCTGAACCTTAAATAAAGTGAGTTGGTTATTCATTCCAAGGATTAAGTCCCA  
ATCTACCTCTCAGCACAATGCAGAAGCTCACCCTGTATTGCTGCCATTAAGTCATGCCAGAACCCTTTG

CCAATAACTGGAATTACAAATTTTTGTTAAAGAAAATTTATCAAGATCTTTCTTTACTGCCTTCTCTATA  
TGTACATCTCAAAAACATGTACATCTCAAAAACCTGGAGTAGAAAGTTAGATTGCTCAACTACAACCTCCTC  
TAGAACTCTATAGCTCTGACATACAGATTCACACTCTCCTCTATTTGCTAAGTATGTAAAGAATGTTTTTC  
TTTTAAAATGTTCTCTTTTGAGAACAACCTGCTTATTTGTTATAAAAGCATTTGGTTAAAATGATGTCATC  
ATAAAAAACAGTGGCTTTGTTTCAATACATATTTTTGAGATGATTATCTAGAAGCCAGATTAATAAAATC  
AGCTTGTGACCTTGCTAAGCATATAAACTGGAAATTCAGATACATTCAAAATTATGGGTTCATTTAAAAG  
TGTTCTACCTTTTGGGTATGAGACTAATATCACTAATTCCTCAATAGTTATCATGGCTCTATCTTAATTA  
ATTAGAAAATATGTGTGTTTAATTCTTTGAGAATTAATAAGAGAAATTAACAGAGGGTTAAAACTGC  
TTCAACTCCAATAAGATAAAGGAAGCTCAAAATCTATGAGCTGAGTGTTCAATTAGCTTTGCCTACTGAG  
TTCAATTTTATGTCAATACAACAGTGGATCAGACAGTACGACTTTGAACTGGTGAATGTAAACAATTGTT  
TTTACCTAAGCTGCTTTGGAAGAACTGATGCTTGCTGCTAACTAAAGTTTTGGATGTATCGATTTAGAG  
AACCAATTAATACCTGCAAAATAAAGCATACTGTGGTACTTCTGTTTGATCTAGTATGTGTGATTTTAGA  
TTGATGGATTAATAAATAAAGATCATACTCCATACCAAAAAAAAAAAAAAAAAAAAA

>NM\_181509.3 Homo sapiens microtubule associated protein 1 light chain 3 alpha (MAP1LC3A),  
transcript variant 2, mRNA

AACTGAAGTTCAGCCACCTGCCACTCCTGACTGCATGGAAGCCAGGTGCAAGGAGAAAGGATTTTGAGGA  
GGGGACTCCATGGCTTCCGAGTTGCTGACTGACCCTCCACCTCAGAGGTAGTTCTGACACTGTCTCAGTT  
TTGCAGATGAAGATGAGATTCTTCAGTTCTCCATGTGGAAAAGCAGCTGTGGACCCAGCCGACCGCTGTA  
AGGAGGTACAGCAGATCCGCGACCAGCACCCAGCAAAATCCCGGTGATCATCGAGCGCTACAAGGGTGA  
GAAGCAGCTGCCCCGTCCTGGACAAGACCAAGTTTTTGGTCCCGGACCATGTCAACATGAGCGAGTTGGTC  
AAGATCATCCGGCGCCGCCTGCAGCTGAACCCACGCAGGCCTTCTTCCTGCTGGTGAACCAGCACAGCA  
TGGTGAGTGTGTCCACGCCCATCGCGGACATCTACGAGCAGGAGAAAGACGAGGACGGCTTCTCTATAT  
GGTCTACGCCTCCAGGAAACCTTCGGCTTCTGAGCCAGCAGTAGGGGGGCTCGGCCTGGGAGTCGGGCG

GCCCCGGTCAGGCCCTGCCAGAGAGCTCCTGGTTCCTGAACTGAGCTGCCTCTACCGTGGTGGGCTGGG  
CAGGCATGTGCCCCCTAGTCAGAGGGCACCAACCCACCTACTCTGCCCCTGGGTGGATCCTGGGCCGGT  
CGTGTTAGGGTTGTCCCTCTGGGTGCTGGCTGGTGGGATGGGGGAGGGTGGGGAGCAGCTCCCAGCACCC  
CTGCTGTGTGGTTCATCTTTTTTTAGGCCCTGCCTGTCTGCCATCTGCCCTCACCCACCCGAGGCT  
CTGCCACCGCCTGGACCTGCCACCCCTGAAAGACTGGCCCCTGGCTCCCCGCCCTCGGTCTCCACGT  
GGTGTATGGATCTGTGGTCATTGTCCCTCTGCAGAATAAAGATTGCTCAGGCCTGCCTGGC

>NM\_022818.5 Homo sapiens microtubule associated protein 1 light chain 3 beta (MAP1LC3B), mRNA

AGAGTCGGATTCGCCGCCGACAGAGCCGCCCGGGAGCCGCCGGGACCCTCGCGTCGTCGCCGCCG  
CCGCCGCCAGATCCCTGCACCATGCCGTCGGAGAAGACCTTCAAGCAGCGCCGCACCTTCGAACAAAGA  
GTAGAAGATGTCCGACTTATTCGAGAGCAGCATCCAACCAAATCCCGGTGATAATAGAACGATACAAGG  
GTGAGAAGCAGCTTCTGTTCTGGATAAAACAAAGTTCCTTGACCTGACCATGTCAACATGAGTGAGCT  
CATCAAGATAATTAGAAGGCGCTTACAGCTCAATGCTAATCAGGCCTTCTTCCTGTTGGTGAACGGACAC  
AGCATGGTCAGCGTCTCCACCAATCTCAGAGGTGTATGAGAGTGAGAAAGATGAAGATGGATTCTGT  
ACATGGTCTATGCCTCCCAGGAGACGTTCCGGATGAAATTGTCAGTGTAACCAGAAAAAATGCAGCTC  
TTCTAGAATTGTTTAAACCTTACCAAGGAAAAAAGGGATGTTACCAACTGAGATCGATCAGTTCATC  
CAATCACAGATCATGAAACAGTAGTGTTCCACCTAGGAGTGTTAGGAAGTTGTGTTTGTGTTTCAAGCA  
GAAAACTGAGCTCCAAGTGAGCACATTCAGCTTTGGAACTATATTATTTAATGTAGGCTAGCTTGTTT  
TCAAATTTTAAAGTTTAAAAATAAAATACTTTGCATTCTAAGTTGCCAATAAAATAGACCTTCAAGTTA  
TTTTAATGCTCTTTTCTACTAATAGGAACTTGTAATTCCAGCAGTAATTTAAAGGCTTTCAGAGAGACC  
CTGAGTCTTCTTTCAGGTTACAAAACCCGCCGCTTTTGGGTAGAAGTTTCTACTCAGCTAGAGAG  
ATCTCCCTAAGAGGATCTTTAGGCCTGAGTTGTGAAGCGCAACCCCGCAAACGCATTTGCCATCACAG  
TTGGCACAAACGCAGGGTAAACGGGCTGTGTGAGAAAACGGCCCTGACTGTAACTGCTGAAGGTCCCTG  
ACTCCTAAGAGAACCACACCCAAAGTCCTCACTCTTGACGGGGTAGACATTTCTGGTTTGGTTTGTCTC

TAGATAGTTACACACATAAAGACACCACTCAAAAGGAACTTGAATAATTTATAATTTTGATCGAGTTTC  
TTAAAAGACCCTGGAGAAAGAGTGGCATTCTTCTGTTTCAGGTTTTGTCTGAGTTCAAAGTAGTGCCTG  
TGTTGTTACGGAAAGCAGCAGTGTACCAAGTGTCACTCTGGAGTACAGCGGGAGAAACACAAAATAGTATA  
ACTGAAAACATTAACATTCAGACACACTCCCTTCTGCCTCCGGCTTAAAGCTGTGGATGATCCACGTTT  
TTGTTTTTTTAATGTTAAATGTGTAACCTCAGTATTACTGAAAAGGTACCCACATTTTGAATAGTAGTTAT  
CACTCTTAGGTCAGACAGCCATCAGAATTCTCCACACCAAGTGCATGTCAGTTGTGGAGAAAACATAGC  
AAAAAGAGCCGTACGCTCTTTACAGATACTAATGTCAAGAGTTAAACCTCCTCAGGTTCAACCTGTGATA  
AAAGACTAGTGCTTCCAGTACTTGCATGGGGTTCCTATTATAGTTTTCTTGGGAGTATCACAGGAAA  
ATCACAATTACACCACTTTAGACCCTATGTGTAGCAGGTCACAACCTACCCTTGTGTGTTTAGATGTGTA  
TGAAATACCTGTATACGTTAGTGAAAGCTGTTTACTGTAACGGGGAAAACCAGATTCTTGCATCTGGGC  
CCTCTACTGATTGTTAAAGGAGTTCCTGTCACCTGCTCCCCCACCCTCGCATGCGTCTGTCCACTTGGC  
TAACTTTTAATATGTGTATTTTACATTATGTATATTCTTAACTGGACTGTCTCGTTTAGACTGTATACA  
TCATATCTGACATTATTGTAACCTACCGTGTGATCAGTAAGATTCTGTAAGAAATACTGCTTTTTAAGAA  
AAAAAATAACATGCTGAGGGGTGACCTATATCCCATGTGAGTGGTCACTTTATTTATAGGATCTTTAAAA  
CATTTTTAATGAACTAAGTTGAATAAAGGCACAATTAAAAACTGTCA

>NM\_001004343.3 Homo sapiens microtubule associated protein 1 light chain 3 gamma (MAP1LC3C), mRNA

AGTTTGGAAGCAGCTGGAGGAATGAGTTAGGTTCCCGTTGCGGGACAGTTTTTTTTCTTTTTTAAAC  
AGACACAGCTACTGAGTGCAATGCCGCTCCACAGAAAATCCCAAGCGTCAGACCTTCAAGCAGAGGAA  
AAGCTTGGCAATCAGACAAGAGGAAGTTGCTGGAATCCGGGCAAAGTTCCCAACAAAATCCCGGTGGTA  
GTGGAGCGCTACCCAGGGAGACGTTCTGCCCCGCTGGACAAAACCAAGTTCCTGGTCCCGCAGGAGC  
TGACCATGACCCAGTTCCTCAGCATCATCCGGAGCCGCATGGTCCTGAGAGCCACGGAAGCCTTTTACTT  
GCTGGTGAACAACAAGAGCCTGGTCAGCATGAGCGCAACCATGGCAGAGATCTACAGAGACTACAAGGAT

GAGGATGGCTTCGTGTACATGACCTACGCCTCCCAGGAGACATTTGGCTGCCTGGAGTCAGCAGCCCCCA  
GGGATGGGAGCAGCCTTGAGGACAGACCCTGCAATCCTCTCTAGCCCATGTCGGAAGGATGTGTGCTCT  
GACAGACGTGTCAGATGCTGGCAGAAGGGATTGGTTTTCTCCTGTGTATACAGTGGAGGAGTCTGAGAAG  
CAGGGATGCCTGGGGTGATCAGCTCCAACCAGTGGCAGCAGAGTGGTGGCTCTCCTAGTTTAGTTTTTG  
TGCTCCGTGTTCTTGTGTCCTTAAGAAAAATGTGGGCTGCTCTTGAAAGTTATATAATTATCATTTTT  
TTTTTTTTGAAACAGGGTCTTGCTCTATTGCCTAGGCTGGAGCACAGTGGCATGATCTTGGCTCACTGCA  
ACCTCCGCCTCCTGGGTTCAAGTGATTCTTCTGCCTCCACCCCCGAGTGGCTGGTATTACAAGCACATG  
CCACCACACCAGGCTAATTTTTGTATTTTTAGTAGAGACGGGGTTTCACCATGTTGGCCAGGCTGGTCTC  
GAACTCCTGACCTCAGGTGATCCACCCACCTCGGCCTCCCAAAGTGCTGGGATTACAGGCGTGAGCCACT  
GCATCCAGCCATATAACCGTATTCTAAATAAGAAATGGTTGGCTTGTGTGATGGTTTTGTGTAATGAGCT  
AGAGATAATATTTTAAGTGTCTTCTGTGGTATATGTGGGAGGGCCATTAAGGAGTGGGTTTCACTCCCTG  
CATGTGGGCAGGTGTCC

>NM\_001297555.2 Homo sapiens mitogen-activated protein kinase kinase 7 (MAP2K7), transcript variant 1, mRNA

AGTGCGGTGTTTGTCTGCCGACTGACGGGCGGCCGGGCGGTGCGCGGCGGCGGTGGCGGCGGGGAAGAT  
GGCGGCGTCTCCCTGGAACAGAAGCTGTCCCGCTGGAAGCAAAGCTGAAGCAGGAGAACCGGGAGGCC  
CGGCGGAGGATCGACCTCAACCTGGATATCAGCCCCAGCGGCCAGGCCATTATTGTGATCACTCTAA  
GCCCTGCTCCTGCCCCGTCCCAACGAGCAGCCCTGCAGCTCCCGCTGGCCAACGATGGGGGCAGCCGCTC  
GCCATCCTCAGAGAGCTCCCCGCAGCACCCACGCCCCCGCCGGCCCCGCCACATGCTGGGGCTCCCG  
TCAACCCTGTTACACCCCCGAGCATGGAGAGCATTGAGATTGACCAGAAGCTGCAGGAGATCATGAAGC  
AGACGGGCTACCTGACCATCGGGGGCCAGCGCTACCAGGCAGAAATCAACGACCTGGAGAACTTGGGCGA  
GATGGGCAGCGGCACCTGCGGCCAGGTGTGGAAGATGCGCTTCCGGAAGACCGGCCACGTCATTGCCGTT

AAGCAAATGCGGCGCTCCGGGAACAAGGAGGAGAAACAAGCGCATCCTCATGGACCTGGATGTGGTGCTGA  
AGAGCCACGACTGCCCCTACATCGTGCAGTGCTTTGGGACGTTTCATCACCAACACGGACGTCTTCATCGC  
CATGGAGCTCATGGGCACCTGCGCTGAGAAGCTCAAGAAGCGGATGCAGGGCCCCATCCCCGAGCGCATT  
CTGGGCAAGATGACAGTGGCGATTGTGAAGGCGCTGTACTACCTGAAGGAGAAGCACGGTGTTCATCCACC  
GCGACGTCAAGCCCTCCAACATCTGCTGGACGAGCGGGGCCAGATCAAGCTCTGCGACTTCGGCATCAG  
CGGCCGCTGGTGGACTCCAAAGCCAAGACGCGGAGCGCCGGCTGTGCCGCTACATGGCACCCGAGCGC  
ATTGACCCCCCAGACCCCAAGCCGGACTATGACATCCGGGCCGACGTATGGAGCCTGGGCATCTCGT  
TGGTGGAGCTGGCAACAGGACAGTTTCCCTACAAGAACTGCAAGACGGACTTTGAGGTCCTACCAAAGT  
CCTACAGGAAGAGCCCCGCTTCTGCCCGGACACATGGGCTTCTCGGGGGACTTCCAGTCCTTCGTCAA  
GACTGCCTTACTAAAGATCACAGGAAGAGACCAAAGTATAATAAGCTACTTGAACACAGCTTCATCAAGC  
GCTACGAGACGCTGGAGGTGGACGTGGCGTCCTGGTTCAAGGATGTCATGGCGAAGACTGAGTACCGCG  
GACTAGCGGCGTCTGAGCCAGCCCCACCTGCCCTTCTTCAGGTAGCTGCTTGGCGGCGGCCAGCCCCAC  
AGGGGGCCAGGGGCATGGCCACAGGCCCCCTCCCCACTTGGCCACCCAGCTGCCTGCCAGGGGAGACCT  
GGGACCTGGACGGCCACCTAGGACTGAGGACAGAGAGTGGGGGGTGCCACCCACCCCCCGCCCCGGG  
CCTACCAAGCCCCCGCCCTTCCACCCGGGGTCAGCCGGCCGTGTGCGTCCCCGACAGAACTGTGAA  
CGGAAGACAGCAGGCCGCGATCAGAGTCGCTGTTTCATTAGCCGCAGCCTCTGGGCCGGGGCGGCCCCCA  
GGGGCCAGGAGAGAGCCCTGGAGTCCCGCAGCCACCATGCACGCTCCAGCGTGCTGTGTCCTTCGCCAC  
TCCACGCGCCCCGTTCTCTTCCGTCGCCCTCTGTCCCCTGCTCTACCTCTCTGTCTTGTCTGGCTCTC  
CCGTACCCCTCCCTGCCTCTGTCTCTTCTGACCTGAGCCTGGGCCAGCCACCTCCTGACGGGTCCCC  
TGGGTCTGCATAGGTCTCCCATGGCGCAATGAGTCAGTGGCCCCAGCCAGGCAGTGTGGGCATTGCCAC  
TGCGGCTGGACGGGGCTGCGCGCTCGCGCTCTCTCTCTCTCTCTCTCTTTGATCTCAGGGGGTC  
CTTTTGGAGTTTATTGTATTTTATTGTACTTGGTGGGGTGTTTGGGGTGGGGGCGGAGGAGAGCTTGTT  
CTCGTGGGGTTGTGCGTACCTTCAGAACTTTTACCAAAGTCACGATTAGCTGCTTGTGGTGGGGCCCCA  
ACCGCCCTCGGGCACTGGGGAGCTGGGCTGGGGCTGCTGCTCTGGGGTCTCCGGGGGCCACAGCTTGGGG  
TGAGTTGAAGACCTCAGGGGATGTGGAGGGGTCTGCGGGGCCCTGGCCGCACAGGATGGCCTTCAGGGAA

>NM\_002745.5 Homo sapiens mitogen-activated protein kinase 1 (MAPK1), transcript variant 1, mRNA

AGTCTGGCAGGCAGGCAGGCAATCGGTCCGAGTGGCTGTCGGCTCTTCAGCTCTCCGCTCGGCGTCTTC  
CTTCCTCTCCCGGTCAGCGTCGGCGGCTGCACCGGCGGCGGCGCAGTCCCTGCGGGAGGGGGCGACAAGA  
GCTGAGCGGGCGGCCCGCGAGCGTCGAGCTCAGCGCGGCGGAGGCGGCGGCGGCCCGGCAGCCAACATGGC  
GGCGGCGGCGGCGGCGGGCGGGCCCGAGATGGTCCGCGGGCAGGTGTTGACGTGGGGCCGCGCTAC  
ACCAACCTCTCGTACATCGGCGAGGGCGCCTACGGCATGGTGTGCTCTGCTTATGATAATGTCAACAAAG

TTCGAGTAGCTATCAAGAAAATCAGCCCCTTTGAGCACCAGACCTACTGCCAGAGAACCCTGAGGGAGAT  
AAAAATCTTACTGCGCTTCAGACATGAGAACATCATTGGAATCAATGACATTATTCGAGCACCAACCATC  
GAGCAAATGAAAGATGTATATATAGTACAGGACCTCATGGAAACAGATCTTTACAAGCTCTTGAAGACAC  
AACACCTCAGCAATGACCATATCTGCTATTTTCTCTACCAGATCCTCAGAGGGTTAAAATATATCCATT  
AGCTAACGTTCTGCACCGTGACCTCAAGCCTTCCAACCTGCTGCTCAACACCACCTGTGATCTCAAGATC  
TGTGACTTTGGCCTGGCCCGTGTGTCAGATCCAGACCATGATCACACAGGGTTCCTGACAGAATATGTGG  
CCACACGTTGGTACAGGGCTCCAGAAATTATGTTGAATTCCAAGGGCTACACCAAGTCCATTGATATTTG  
GTCTGTAGGCTGCATTCTGGCAGAAATGCTTTCTAACAGGCCCATCTTTCCAGGGAAGCATTATCTTGAC  
CAGCTGAACCACATTTTGGGTATTCTTGGATCCCCATCACAAGAAGACCTGAATTGTATAATAAATTTAA  
AAGCTAGGAACATTTTGCTTTCTTCCACACAAAAATAAGGTGCCATGGAACAGGCTGTTCCCAAATGC  
TGA CTCCAAAGCTCTGGACTTATTGGACAAAATGTTGACATTCAACCCACACAAGAGGATTGAAGTAGAA  
CAGGCTCTGGCCACCCATATCTGGAGCAGTATTACGACCCGAGTGACGAGCCCATCGCCGAAGCACCAT  
TCAAGTTCGACATGGAATTGGATGACTTGCCTAAGGAAAAGCTCAAAGAACTAATTTTTGAAGAGACTGC  
TAGATTCCAGCCAGGATACAGATCTTAAATTTGTCAGGACAAGGGCTCAGAGGACTGGACGTGCTCAGAC  
ATCGGTGTTCTTCTCCAGTTCTTGACCCCTGGTCCTGTCTCCAGCCCGTCTTGGCTTATCCACTTTGA  
CTCCTTTGAGCCGTTTGGAGGGGCGGTTTCTGGTAGTTGTGGCTTTTATGCTTTCAAAGAATTTCTTCAG  
TCCAGAGAATTCCTCTGGCAGCCCTGTGTGTGTGACCCATTGGTGACCTGCGGCAGTATGTACTTCAGT  
GCACCTACTGCTTACTGTTGCTTTAGTCACTAATTGCTTTCTGGTTTGAAAGATGCAGTGGTTCCTCCCT  
CTCCTGAATCCTTTTCTACATGATGCCCTGCTGACCATGCAGCCGCACCAGAGAGAGATTCTTCCCCAAT  
TGGCTCTAGTCACTGGCATCTCACTTTATGATAGGGAAGGCTACTACCTAGGGCACTTTAAGTCAGTGAC  
AGCCCCTTATTTGCACTTCACCTTTTGACCATAACTGTTTCCCCAGAGCAGGAGCTTGTGGAAATACCTT  
GGCTGATGTTGCAGCCTGCAGCAAGTGCTTCCGTCTCCGAATCCTTGGGGAGCACTTGTCCACGTCTTT  
TCTCATATCATGGTAGTCACTAACATATATAAGGTATGTGCTATTGGCCCAGCTTTTAGAAAATGCAGTC  
ATTTTTCTAAATAAAAAGGAAGTACTGCACCCAGCAGTGTCACTCTGTAGTTACTGTGGTCACTTGTACC  
ATATAGAGGTGTAACACTTGTCAAGAAGCGTTATGTGCAGTACTTAATGTTTGTAAAGACTTACAAAAAA

GATTTAAAGTGGCAGCTTCACTCGACATTTGGTGAGAGAAGTACAAAGGTTGCAGTGCTGAGCTGTGGGC  
GGTTTCTGGGGATGTCCCAGGGTGGAAGTCCACATGCTGGTGCATATACGCCCTTGAGCTACTTCAAATG  
TGGGTGTTTCAGTAACCACGTTCCATGCCTGAGGATTTAGCAGAGAGGAACACTGCGTCTTTAAATGAGA  
AAGTATACAATTCTTTTCTTCTACAGCATGTCAGCATCTCAAGTTCATTTTTCAACCTACAGTATAAC  
AATTTGTAATAAAGCCTCCAGGAGCTCATGACGTGAAGCACTGTTCTGTCCTCAAGTACTCAAATATTTT  
TGATACTGCTGAGTCAGACTGTCAGAAAAAGCTAGCACTAACTCGTGTTTGGAGCTCTATCCATATTTTA  
CTGATCTCTTTAAGTATTTGTTCTGCCACTGTGTACTGTGGAGTTGACTCGGTGTTCTGTCCCAGTGCG  
GTGCCTCCTCTTGACTTCCCCACTGCTCTCTGTGGTGAGAAATTTGCCTTGTTCAATAATTACTGTACCC  
TCGCATGACTGTTACAGCTTTCTGTGCAGAGATGACTGTCCAAGTGCCACATGCCTACGATTGAAATGAA  
AACTCTATTGTTACCTCTGAGTTGTGTTCCACGGAAAATGCTATCCAGCAGATCATTTAGGAAAAATAAT  
TCTATTTTATAGCTTTTCATTTCTCAGCTGTCTTTTTTTCTTGTTTGATTTTGGACAGCAATGGAGAATGG  
GTTATATAAAGACTGCCTGCTAATATGAACAGAAAATGCATTTGTAATTCATGAAAAATAAATGTACATCTT  
CTATCTTCACATTCATGTTAAGATTCAGTGTTGCTTTCCTCTGGATCAGCGTGTCTGAATGGACAGTCAG  
GTTCAGGTTGTGCTGAACACAGAAAATGCTCACAGGCCTCACTTTGCCGCCAGGCACTGGCCCAGCACTT  
GGATTTACATAAGATGAGTTAGAAAAGGTACTTCTGTAGGGTCCTTTTTACCTCTGCTCGGCAGAGAATCG  
ATGCTGTGATGTTCTTTATTCACAATCTTAGGTCTCAAATATTCTGTCAAACCCTAACAAAGAAGCCCC  
GACATCTCAGGTTGGATTCCCTGGTTCTCTCTAAAGAGGGCCTGCCCTTGTCGCCAGAGGTGCTGCTGG  
GCACAGCCAAGAGTTGGGAAGGGCCGCCACAGTACGCAGTCCTCACCACCCAGCCAGGGTGCTCACG  
CTCACCCTCCTGTGGCTGAGGAAGGATAGCTGGCTCATCCTCGGAAAACAGACCCACATCTCTATTCTT  
GCCCTGAAATACGCGCTTTTCACTTGCGTGCTCAGAGCTGCCGTCTGAAGGTCCACACAGCATTGACGGG  
ACACAGAAAATGTGACTGTTACCGGATAACACTGATTAGTCAGTTTTTCATTTATAAAAAAGCATTGACAGT  
TTTATTACTCTTGTTCTTTTAAATGGAAAGTTACTATTATAAGGTTAATTTGGAGTCCTCTCTAAAT  
AGAAAACCATATCCTTGGCTACTAACATCTGGAGACTGTGAGCTCCTTCCCATTCCCCTTCTGGTACTG  
TGGAGTCAGATTGGCATGAAACCACTAACTTCATTCTAGAATCATTGTAGCCATAAGTTGTGTGCTTTTT  
ATTAATCATGCCAAACATAATGTAAGTGGGCAGAGAATGGTCCTAACCAAGGTACCTATGAAAAGCGCTA

GCTATCATGTGTAGTAGATGCATCATTTTGGCTCTTCTTACATTTGTAAAAATGTACAGATTAGGTCATC  
TTAATTCATATTAGTGACACGGAACAGCACCTCCACTATTTGTATGTTCAAATAAGCTTTCAGACTAATA  
GCTTTTTTGGTGTCTAAAATGTAAGCAAAAAATTCCTGCTGAAACATTCCAGTCCTTTCATTTAGTATAA  
AAGAAATACTGAACAAGCCAGTGGGATGGAATTGAAAGAACTAATCATGAGGACTCTGTCCTGACACAGG  
TCCTCAAAGCTAGCAGAGATACGCAGACATTGTGGCATCTGGGTAGAAGAATACTGTATTGTGTGTGCAG  
TGCACAGTGTGTGGTGTGTGCACACTCATTCTTCTGCTCTTGGGCACAGGCAGTGGGTGTAGAGGTAAC  
CAGTAGCTTTGAGAAGCTACATGTAGCTCACCAGTGGTTTTCTCTAAGGAATCACAAAAGTAACTACCC  
AACCACATGCCACGTAATATTTTCAGCCATTCAGAGGAACTGTTTTCTCTTTATTTGCTTATATGTTAAT  
ATGGTTTTTAAATTGGTAACTTTTATATAGTATGGTAACAGTATGTTAATACACACATACATACGCACAC  
ATGCTTTGGGTCCTTCCATAATACTTTTATATTTGTAAATCAATGTTTTGGAGCAATCCCAAGTTTAAGG  
GAAATATTTTTGTAAATGTAATGGTTTTGAAAATCTGAGCAATCCTTTTGCTTATACATTTTTAAAGCAT  
TTGTGCTTTAAATTGTTATGCTGGTGTGTTGAAACATGATACTCCTGTGGTGCAGATGAGAAGCTATAAC  
AGTGAATATGTGGTTTCTCTTACGTCATCCACCTTGACATGATGGGTCAGAAACAAATGGAAATCCAGAG  
CAAGTCCTCCAGGGTGCACCAGGTTTACCTAAAGCTTGTTGCCTTTTCTTGCTGCTGTTTATGCGTGTAG  
AGCACTCAAGAAAGTTCTGAAACTGCTTTGTATCTGCTTTGTACTGTTGGTGCCTTCTTGGTATTGTACC  
CCAAAATTCTGCATAGATTATTTAGTATAATGGTAAGTTAAAAATGTTAAAGGAAGATTTTATTAAGAA  
TCTGAATGTTTATTCATTATATTGTTACAATTTAACATTAACATTTATTTGTGGTATTTGTGATTTGGTT  
AATCTGTATAAAAAATTGTAAGTAGAAAGGTTTATATTTTCATCTTAATTCTTTTGATGTTGTAAACGTACT  
TTTTAAAAGATGGATTATTTGAATGTTTATGGCACCTGACTTGTAACAAAAAAAAAACTACAAAAAAATCC  
TTAGAATCATTAAATTGTGTCCCTGTATTACCAAATAACACAGCACCGTGCATGTATAGTTTAATTGCA  
GTTTCATCTGTGAAAACGTGAAATTGTCTAGTCCTTCGTTATGTTCCCCAGATGTCTTCCAGATTTGCTC  
TGCATGTGGTAACTTGTGTTAGGGCTGTGAGCTGTTCTCGAGTTGAATGGGGATGTCAGTGCTCCTAGG  
GTTCTCCAGGTGGTTCTTCAGACCTTCACCTGTGGGGGGGGGGGTAGGCGGTGCCACGCCCATCTCCTC  
ATCCTCCTGAACTTCTGCAACCCCACTGCTGGGCAGACATCCTGGGCAACCCCTTTTTTCAGAGCAAGAA  
GTCATAAAGATAGGATTTCTTGGACATTTGGTTCTTATCAATATTGGGCATTATGTAATGACTTATTTAC

AAAACAAAGATACTGGAAAATGTTTTGGATGTGGTGTTATGGAAAGAGCACAGGCCTTGGACCCATCCAG  
CTGGGTTTCAGAACTACCCCTGCTTATAACTGCGGCTGGCTGTGGGCCAGTCATTCTGCGTCTCTGCTTT  
CTTCCTCTGCTTCAGACTGTCAGCTGTAAAGTGGAAGCAATATTACTTGCCTTGTATATGGTAAAGATTA  
TAAAAATACATTTCAACTGTTTCAGCATAGTACTTCAAAGCAAGTACTCAGTAAATAGCAAGTCTTTTTAA  
A

>NM\_001040056.3 Homo sapiens mitogen-activated protein kinase 3 (MAPK3), transcript variant 2,  
mRNA

GAGGAGTGGAGATGGCGGCGGCGGCGGCTCAGGGGGGCGGGGGCGGGGAGCCCCGTAGAACCGAGGGGGT  
CGGCCCCGGGGTCCCGGGGGAGGTGGAGATGGTGAAGGGGCAGCCGTTTCGACGTGGGCCCCGCGCTACACG  
CAGTTGCAGTACATCGGCGAGGGCGCGTACGGCATGGTCAGCTCGGCCTATGACCACGTGCGCAAGACTC  
GCGTGGCCATCAAGAAGATCAGCCCCCTCGAACATCAGACCTACTGCCAGCGCACGCTCCGGGAGATCCA  
GATCCTGCTGCGCTCCGCCATGAGAATGTCATCGGCATCCGAGACATTCTGCGGGCGTCCACCCTGGAA  
GCCATGAGAGATGTCTACATTGTGCAGGACCTGATGGAGACTGACCTGTACAAGTTGCTGAAAAGCCAGC  
AGCTGAGCAATGACCATATCTGCTACTTCCTCTACCAGATCCTGCGGGGCCTCAAGTACATCCACTCCGC  
CAACGTGCTCCACCGAGATCTAAAGCCCTCCAACCTGCTCATCAACACCACCTGCGACCTTAAGATTTGT  
GATTCGGCCTGGCCCCGATTGCCGATCCTGAGCATGACCACACCGGCTTCCTGACGGAGTATGTGGCTA  
CGCGCTGGTACCGGGCCCCAGAGATCATGCTGAACTCCAAGGGCTATACCAAGTCCATCGACATCTGGTC  
TGTGGGCTGCATTCTGGCTGAGATGCTCTTAACCGGCCATCTTCCTGGCAAGCACTACCTGGATCAG  
CTCAACCACATTCTGGGCATCCTGGGCTCCCCATCCCAGGAGGACCTGAATTGTATCATCAACATGAAGG  
CCCGAAACTACCTACAGTCTCTGCCCTCCAAGACCAAGGTGGCTTGGGCCAAGCTTTTCCCCAAGTCAGA  
CTCCAAAGCCCTTGACCTGCTGGACCGGATGTTAACCTTTAACCCCAATAAACGGATCACAGTGGAGGAA  
GCGCTGGCTACCCCTACCTGGAGCAGTACTATGACCCGACGGATGAGGTGGGCCAGTCCCCAGCAGCAG  
TGGGGCTGGGGGCAGGGGAGCAGGGGGGCACGTAG

>NM\_001278547.2 Homo sapiens mitogen-activated protein kinase 8 (MAPK8), transcript variant JNK1-b2, mRNA

GTTACTCAGCCGAGCGGCCGAGGCCGACGACGCGGCTTGGATTGCGGAGCCGCGAGCAGCGCTGGGTAA  
CGGCCGCGGCGACCAACCCCGACGGCCCTGTCCCCGCTGGCGGGCTTCCCTGTCGCCGTTGCTGCGCT  
GCCGGCTTCTTGGTGAATTTTTGGATGAAGCCATTAAATTAATTGCTTGCCATCATGAGCAGAAGCAAGC  
GTGACAACAATTTTTATAGTGTAGAGATTGGAGATTCTACATTCACAGTCCTGAAACGATATCAGAATTT  
AAAACCTATAGGCTCAGGAGCTCAAGGAATAGTATGCGCAGCTTATGATGCCATTCTTGAAAGAAATGTT  
GCAATCAAGAAGCTAAGCCGACCATTTCAGAATCAGACTCATGCCAAGCGGGCCTACAGAGAGCTAGTTC  
TTATGAAATGTGTTAATCACAAAAATATAATTGGCCTTTTGAATGTTTTACACCACAGAAATCCCTAGA  
AGAATTTCAAGATGTTTACATAGTCATGGAGCTCATGGATGCAAATCTTTGCCAAGTGATTCAGATGGAG  
CTAGATCATGAAAGAATGTCCTACCTTCTCTATCAGATGCTGTGTGGAATCAAGCACCTTCATTCTGCTG  
GAATTATTCATCGGGACTTAAAGCCCAGTAATATAGTAGTAAATCTGATTGCACTTTGAAGATTCTTGA  
CTTCGGTCTGGCCAGGACTGCAGGAACGAGTTTTATGATGACGCCTTATGTAGTGACTCGCTACTACAGA  
GCACCCGAGGTCATCCTTGGCATGGGCTACAAGGAAAACGTTGACATTTGGTCAGTTGGGTGCATCATGG  
GAGAAATGATCAAAGGTGGTGTGTTTTGTTCCAGGTACAGATCATATTGATCAGTGGAATAAAGTTATTGA  
ACAGCTTGGAACACCATGTCCTGAATTCATGAAGAACTGCAACCAACAGTAAGGACTTACGTTGAAAAC  
AGACCTAAATATGCTGGATATAGCTTTGAGAACTCTCCCTGATGTCCTTTTCCAGCTGACTCAGAAC  
ACAACAACTTAAAGCCAGTCAGGCAAGGGATTTGTTATCCAAAATGCTGGTAATAGATGCATCTAAAAG  
GATCTCTGTAGATGAAGCTCTCCAACACCCGTACATCAATGTCTGGTATGATCCTTCTGAAGCAGAAGCT  
CCACCACCAAAGATCCCTGACAAGCAGTTAGATGAAAGGGAACACACAATAGAAGAGTGGAAGAATTGA  
TATATAAGGAAGTTATGGACTTGGAGGAGAGAACCAAGAATGGAGTTATACGGGGGCAGCCCTCTCCTTT  
AGGTGCAGCAGTGATCAATGGCTCTCAGCATCCATCATCATCGTCGTCTGTCAATGATGTGTCTTCAATG  
TCAACAGATCCGACTTTGGCCTCTGATACAGACAGCAGTCTAGAAGCAGCAGCTGGGCCTCTGGGCTGCT

GTAGATGACTACTTGGGCCATCGGGGGGTGGGAGGGATGGGGAGTCGGTTAGTCATTGATAGAACTACTT  
TGAAAACAATTCAGTGGTCTTATTTTTGGGTGATTTTTCAAAAAATGTAGAATTCATTTGTAGTAAAGT  
AGTTTATTTTTTTTAATTTCAAGTGATGTAATTTAAACCTAAGTTGTGTTTCAAACAGCAACAAACT  
GTATTGTATTTTTTTTGCTGTAATTAAGTGTATAATGTAAACCTAATTATTTATCATGGTTTAAATTTT  
TTGCATATTTGCTTTATCTTATGCTGCTGATTTTTTAACTGAATTTGTAAGATTTTGTATCAAAGCA  
ACTATTATGTGGTGACTTGCCTATATCATGAATTATTTAAGATTTTATAGTTTTTTTTAATTAGAATTT  
ATTCAGATGTTTTGTTTCATGATACTATCCTTCAGGGTTATGTGCTTATCAATGAAATAACCCAGAGGA  
GTGAGGGAAAATAACTTGTAGCCAGTTATATTCAGGAATAACTACTGTAAATGATGAACGTGTTAGGAGA  
CCTCCAATATTTGCTACTTGCCAATCCTAATTTAGTTACAAGAATTGGTAGGCAATCCTACTTAATTTTG  
GCAAAAGCCCCGTCATCTAAATGGCAGAATAACTCAGAGCATGTCTTTGAAGATGCTGGGCGTCTACCAC  
CACCTTATGTCCCCACCCTACCCAACAAAAATAAGTAAAAAGAATATGGTGTATTCTACAAATTTGTGGC  
ATGCTCAAAGTTTATGATCACATAAAGGCAAGAGGATACTTCATGAATAATACATTTCAATGCAAATAAA  
CAGATGGTTCACCTCTACTAGCTATGAGCCTGTTTTGTATACACTGAGTTAATCTACTCAGGCTGTAGG  
TCCCAGCAATGTTCTAGAGTCTGGTCTTCCCTTTCCTGCAGCTTCGGGTCCTTGGACCTTTCCTGTTTC  
CTATTACTTGGAGTGTCTGTCAGTTGAGCACCAGTTGTTCTGGTGTTTCATTTGATTCTACTTGTAGCAT  
AATCATTTATACGAGCTATTGGGAGGTTCCAAACCCTACCTAGATTTGTGTAGGTGATGTATCAAATGAG  
CAATATACCGTTCATCTGAAAATAGTAGCACACAGCCATATATAGGATATCATTTTCTAAGGACTGTTTC  
TTCACATTGAGCAGAGCAGGCATAAATGGTGGTTATTTAGTCTAAGTCTTTATTTTTTTATACCTGATT  
TTCAACATAACACGCAATGTGGATGTCGAGTAGTGTTAAGAATGGTGCTGCTCCTGACAAGTGTATGTTA  
ACTGTTTACATTTTCTATCTGTAGAATTATTTCTCTATTACTGAACTTTTCCTAAGTAAAATGTCTTTGA  
AGTCTCGTTATTTCTGAAATACGTTGTCTGTAATAGACCCAGGCACCTTTTAAATTATCTCTGGAACAAG  
AGGGATTTTCATGTAATGAACTAGGAAATGCATACTCACATAAGCAACAAGGTTCTAGGCAGAAAGCCCCT  
TGGAATTTGTGACCAACAGGAGCAAGAACAGGTGCGGCTCAACATGCAATGTCTGAAAATTTGCTTGCCA  
TTTTATTCATATATTTAGTGCAAAATTATTTTTGAGTGAGATATTTTACATCACTGTTAATGTGCAATAT  
TTAAGATTAAAATACATTAGCTTTTTTATATACTTTGAAGTAGCAAGTTTGTTTTCGATGGCTTAGAGTC

ATGATTTCAGCTCCCAGCCTTTTATCAGTCCCTTTCTAATACAACAAGGTGCATTAATTTGATTAG  
GCAAATTAGAGTTCTAAGACACTTCTGAATTGTAGACAGAAAATATTGGATTCACAATTCAGCAGAAA  
TTTGAGAATGAGTGTGTTTATATTAATTTACAATTAGCTGTATTTCTGTAGCATAGATTATGTCACTG  
TTGCACTTTCACAGCAGACATGCTTTCAGAAGGTTCTCATATTTTATGTTTGATTGCTGATAAGCCATCT  
CTATTGATACAGATTTTGGTTAAGTAAGGAAAACCAGGTGTGTGTCTGTATCATTATTGTAAATGCCAG  
CTGCCACTTGCCAACCATCATGTTCAAGTTCAATTCAAAGAAAACAACTCTCATTACTTAGTGTAACATA  
AAATACTTAACAAATTATATCCTAAAAACAAGGTCTCTTTGTAAATGTTGCATGCCCTAGGTTTTAAAT  
TACTACATCCAAATACAGTTTTCGTCTTAAATTTGTTAAGCTAAATATATGTTGGTTCTTTTTATTTTG  
AATCCTTTAAGCATCTTAAACATTTTTTTTTTTGAAGAGAAGTTACAAATAACATTTCTATCAGGTAGTAC  
TTGTATGAAACCACCTTCTTATTCTATAATTTTGATTTTCAATTTTATATACTTAATATACTCACTGT  
CTTACTATCAGAAAGTTATTTTGACCAAGATTTTATTATCTTCATAGATTCAGAAAGAGATGCTAATTC  
TGTACCAATGTCTCCTGGTTACTATTCTCTCCCTCTAATATATACTGGCCATTTGTAAAACCATTTGTG  
TTGTTGGGATCACTTAGTTATACTATACGCAGATAGAGCATCTCAACTCTGTCATAGTGTGTTGCTGAACA  
GTTTTCAAGTGCATGCACCTTTGGCTGCTAATTGTTCTGACGTGCACTCTCCGAGTTGGTAAAGGCAC  
AGTGTGTTTCATGCCAGACTTCTAAGAGAAACACCAGCCTCTTAAATCAGAAGCCTACACACAACCCCTT  
AACAATCCAAAGAAGCTTGATGGTGTGCAAAGAAGCATCCTGCCAGCCTTGTCATTGTTCTGTTCTATGC  
TAATCCTGCTGTGTTGTCTAAAAGATGGAGGGAAGAGGACATCAGTGTCTGATAGTGAAATCATCAGCAG  
GAAAGTGAAGCTCTTTCCTTGGTTACAGATAAGACTTGGTTTACACTATTGGCCAGTATCTGCTAAACAT  
ATGAAGACTTAACTATTCAGTGTGCTAGGCATTCGCCTGCACAACATTTTGAGGTTAGAACATAGAAT  
ATTTTCAGAAATACTGTTGTAGTTTGTGAGTGTGTTTATTAGTTACACATTAGCTATAGAGTGGATGCA  
TGAAGCCCCATGACACCAGTAACTTCTCTTACCAGTAGGTAAACCAAACACCATTCTGTCATTAGCAGC  
CCTCTTAAATGTTGCCTCTCCGTATCCTGTTGCATTTTTGTGTGCATTGTGTTTCTACTGATCTCTCTTA  
GGTTTTTACGGAATCAAAGGAACTAATTTTTCCTTAATAGCAAGAAAGATGAAGAGGTAAAGGGCATTG  
AAGCAGAAATGTATAGTTTGGGGTACGATTAGAAAACCTCGTAAGGAAAACAGAAGTCCTAATTTCAAAC  
GACTGCTCTTCGTTAAGTGCTCTTAAGGAGAGTCTAGTAACAGTAACACTTTCTGGCCATTTCTAGTTTA

GATTCTCTTCGTTACTGAACTTTTGAGAAATATTACCTGTGGATTAATTTGCACAATGTTCTATTCTC  
ATAATGACTTACAAATTAACTAGGTTTTATTGAACTACCTCACACTAATTTTCTATGCTTTCCCAAGT  
AAGCTGTTGCCCTGTTAGATCTTTACTGAGTGAATTATAAATGTGTGTTAAATACTTTCTAGCCAATGTT  
GACACAATACCAGTAAGTATGTAAAGTATATACCTTACATCAGTAAGAGACACGTGTAAAATCTTTGACT  
GTATGTCTTGCAAAATTGTGCTCGTTGACATTATTACTGTTTTGTAAAGTAGAAACCTGCTCGTGATATC  
GGTCCATTTACATTTTACAAAAGGAGTAAATCTTAGTAAAAATTTACGAAGAAATAAATTACTTTTGTA  
GGCCAATATTTGGTATATTTTGAGAAGCTGTAAATCTTTAGCTGAATAATGAAGTTAGACTGAATTA  
CGTGTCTCCCTGGACTGTGACATCTATTTTCTATTACAGTTTATCCTGGTCAGCAGGGTGTACACCTG  
GAAACCTGAGTATGATAGCTGACATTTGCTTTTCTCCCTCTGCGATGTCATTCCTCCTCCATTCTCTCC  
TTCCCTGTGTTCCGTTCCCTCTCCTTTCTCTAGACAAAACAAAATGGGGCACTTTTTAGGGAATGCTGA  
GATCATTATTGTGGTTTTTCATCATTATGACCTAGTCATTAAACATGCACCACTGGAATGTAAACAATG  
TTATCTAGTATGTCAATTGGTTATAATATTTTAAATAAAAAAGAAAAAGTGGTATGAAAATTATGAAA

>NM\_005456.4 Homo sapiens mitogen-activated protein kinase 8 interacting protein 1 (MAPK8IP1), mRNA

AGTCCCGCGGGCCGTGCGCGGTGCTGTGCCGCGCCCTGCCAGACACAGGTGCGCCCGCTAGCCCGAACT  
CCGCGGGCGGGCTGCCCTCTCGCCGCGCCTCCGCCTCCTTCGAGCCGCGCCTCCTCCGCGCCGCGCT  
CCGCCCCGATGGCCAGGGCTGTGCCCCGAGAATGGCGGAGCGAGAAAGCGGCGGCCTGGGAGGGGGGGCCG  
CGTCCCCGCCCCGCGCCTCCCCGTTCTGGGGCTGCACATCGCTTCGCCTCCCAATTTAGGCTCACCCA  
TGACATCAGCCTGGAGGAGTTTGAGGATGAAGACCTCTCGGAGATCACTGATGAGTGTGGCATCAGCTTA  
CAGTGCAAAGACACCCTGTCCTACGGCCCCCGCGCGCCGGGCTGCTCTCTGCGGGCGGCGGCGGCGCGG  
GGAGCCGGTTGCAGGCCGAGATGCTGCAGATGGACCTGATCGACGCGACGGGGGACACTCCCGGGGCCGA  
GGACGACGAGGAGGACGACGACGAGGAGCGCGCGGCCCGGCGGCCGGGAGCGGGGCCGCCAAGGCCGAG  
TCCGGCCAGGAGCCGGCGTCCCGCGGCCAGGGCCAGAGCCAAGGCCAGAGCCAGGGCCCGGGCAGCGGGG

ACACGTACCGGCCCAAGCGGCCACCACGCTCAACCTCTTCCGCAGGTGCCGCGGTCTCAGGACACACT  
GAATAATAATTCTCTGGGCAAAAAGCACAGTTGGCAGGATCGGGTGTCTCGATCATCCTCACCCCTGAAG  
ACAGGGGAGCAGACACCACCGCATGAACACATCTGCCTGAGCGATGAGCTGCCCCCAGAGCGGCCCCG  
CCCCACCACAGATCGAGGCACCTCCACCGACAGCCCTTGCCGCCGAGCACAGCCACCCAGATGGCACC  
TCCGGGTGGTCCCCCTGCTGCCCCGCCTGGGGGTGCGGGGCACTCGCATCGAGACCGAATCCACTACCAG  
GCCGATGTGCGACTAGAGGCCACTGAGGAGATCTACCTGACCCCAGTGCAGAGGCCCCCAGACGCTGCAG  
AGCCACCTCCGCCTTCTGCCGCCACTGAGAGCCGGATGTCAGTCAGCTCCGATCCAGACCCTGCCGC  
CTACCCCTCCACGGCAGGGCGGGCCGACCCCTCCATCAGTGAAGAGGAAGAGGGCTTCGACTGCCTGTCTG  
TCCCCAGAGCGGGCTGAGCCCCAGGCGGAGGGTGGCGGGGGAGCCTGGGGGAGCCGCCGCCACCTCCAC  
GGGCCTCTCTGAGCTCGGACACCAGCGCCCTGTCCTATGACTCTGTCAAGTACACGCTGGTGGTAGATGA  
GCATGCACAGCTGGAGCTGGTGAGCCTGCGGCCGTGCTTCGGAGACTACAGTGACGAGAGTGACTCTGCC  
ACCGTCTATGACAACTGTGCCTCCGTCTCCTCGCCCTATGAGTCGGCCATCGGAGAGGAATATGAGGAGG  
CCCCGCGGCCCCAGCCCCCTGCCTGCCTCTCCGAGGACTCCACGCCTGATGAACCCGACGTCCATTCTC  
CAAGAAATTCCTGAACGTCTTCATGAGTGGCCGCTCCCGCTCCTCCAGTGCTGAGTCCTTCGGGCTGTTC  
TCCTGCATCATCAACGGGGAGGAGCAGGAGCAGACCCACCGGGCCATATTCAGGTTTGTGCCTCGACACG  
AAGACGAACTTGAGCTGGAAGTGGATGACCCTCTGCTAGTGGAGCTCCAGGCTGAAGACTACTGGTACGA  
GGCCTACAACATGCGCACTGGTGCCCGGGGTGTCTTTCCTGCCTATTACGCCATCGAGGTCACCAAGGAG  
CCCGAGCACATGGCAGCCCTGGCCAAAAACAGTGACTGGGTGGACCAGTTCGGGTGAAGTTCCTGGGCT  
CAGTCCAGGTTCCCTATCACAAGGGCAATGACGTCTCTGTGCTGCTATGCAAAAGATTGCCACCACCCG  
CCGGCTACCGTGCACTTTAACCCGCCCTCCAGCTGTGTCTGAGATCAGCGTGCGGGGTGTGAAGATA  
GGCGTCAAGGCCGATGACTCCCAGGAGGCCAAGGGGAATAAATGTAGCCACTTTTTCCAGTTAAAAACA  
TCTCTTTCTGCGGATATCATCAAAGAACAACAAGTACTTTGGGTTTCATACCAAGCACCCCGCCGACCA  
CCGGTTTGCCTGCCACGTCTTTGTGTCTGAAGACTCCACCAAAGCCCTGGCAGAGTCCGTGGGGAGAGCA  
TTCCAGCAGTTCTACAAGCAGTTTGTGGAGTACACCTGCCCCACAGAAGATATCTACCTGGAGTAGCTGT  
GCAGCCCCGCCCTCTGCGTCCCCCAGCCCTCAGGCCAGTGCCAGGACAGCTGGCTGCTGACAGGATGTGG

CACTGCTTGAGGAGGGGCACCTGCCACCGCCAGAGGACAAGGAAGTGGGGGCGCTGGCCCAGGGTAGGG  
GAGGGTGGGGCAATGGGGAGAGGCAAATGCAGTTTATTGTAATATATGGGATTAGATTCATCTATGGAGG  
GCAGAGTGGGCTGCCTGGGGATTGGGAGGGACAGGGCTTGGGGAGCAGGTCTCTGGCAGAGAAGGATGTC  
CGTTCCAGGAGCACACGGCCCTGCCCCATCCTGGGCCTTACCTCCCCTGCCAGGGCTCGGGCGCTGTGGC  
TCCTGCCTTGATGAAGCCCGTGTCTGCCTTGATGAAGCCTGTGCCACCTGCAAGTGCCCGCCCTGCCCC  
TGCCCCAACCCCCACCGAAGAGCCCTGAGCTCAGGCTGAGCCCAGCCACCTCCCAAGGACTTTCCAGTGA  
GGAAATGGCAACACGTGGAGGTGAAGTCCCTGTTCTCAGTCCGTCATCTGCGGGGCTTCTGGGTGGCTC  
CTGCCACTGACCTCACCGGCATGCTGGCCTGTGGCAGGCCTAGGACCTCAGGCGGGGAGGAGGAGCTGCC  
GCAAGGCCCTGTCCAGCAGAAGAGGGAGGCTTCTGACTGACACAGGCCAGCCCCATCTTGGTCCTGTC  
ACCCTGGCCCCAACTATTAAAGTGCCATTTCTGTCTGGA

>NM\_001135044.2 Homo sapiens mitogen-activated protein kinase 9 (MAPK9), transcript variant JNK2-  
g, mRNA

AGACCGGGCGCCGCGGCGGCGGCAGCGGCGGAGAAGGGAGCGGGACCGGAAGGGTCGCAGCGCCCCGGCG  
CCCCACACCCACTGCGGCGGCGGCGGCGGCGGCGGCGGGGCGGAGCGGAGCGGGGCGGGCCGGCG  
GCGGAGCCGGGGCCGCGGAGCCAGGAGTGAAGTACTAGCACGCAGCGCCGCGCAGTCCGCCCCGCCCTCTCC  
CCGTGGCGGCGGCGGCGGGGAGGCGAGGGATCTGAAACTTGCCACCCCTTCGGGATATTGCAGGACGCTGC  
ATCATGAGCGACAGTAAATGTGACAGTCAGTTTTATAGTGTGCAAGTGGCAGACTCAACCTTCACTGTCC  
TAAAACGTTACCAGCAGCTGAAACCAATTGGCTCTGGGGCCCAAGGATTGTTTGTGCTGCATTTGATAC  
AGTTCTTGGGATAAATGTTGCAGTCAAGAACTAAGCCGTCCTTTTCAGAACCAAACTCATGCAAAGAGA  
GCTTATCGTGAACCTGTCTCTTAAATGTGTCAATCATAAAAATATAATTAGTTTGTTAAATGTGTTTA  
CACCACAAAAAACTCTAGAAGAATTTCAAGATGTGTATTTGGTTATGGAATTAATGGATGCTAACTTATG  
TCAGGTTATTCACATGGAGCTGGATCATGAAAGAATGTCCTACCTTCTTACCAGATGCTTTGTGGTATT  
AAACATCTGCATTCAGCTGGTATAATTCATAGAGATTTGAAGCCTAGCAACATTGTTGTGAAATCAGACT

GCACCCTGAAGATCCTTGACTTTGGCCTGGCCCGGACAGCGTGCACCTAACTTCATGATGACCCCTTACGT  
GGTGACACGGTACTACCGGGCGCCCGAAGTCATCCTGGGTATGGGCTACAAAGAGAACGTTGATATCTGG  
TCAGTGGGTTGCATCATGGGAGAGCTGGTGAAAGGTTGTGTGATATTCCAAGGCACTGACCGTATCCTTC  
CCCGCGACCTTGCCCCGCCATGCTTTCTTAATGCCTCAGGCAGCATGACCACCTGCTTACACGAGCGCT  
CACGAGGACAAAGTCGTAAAATCCACTCCAGACTGTGTTCTAAGGGGGGCTTTACTGTATTTGTTAATTA  
GTGTCACAAGCCAAGTGGTTCAATTTCAATCTTTATTTTTAACTTGACTACCTGTGATGACTTTGAGACT  
TAGAGTTCAGTTAAACCGATTATATTAGCTCTTAATTTTGCCAAAATAGCTGGACACATAGAAGAAATT  
ATTTACTCTTTGATAAGTATATTCTGATATTTAAATGAAAATACTGTATTATTTAGTTTATTCGGTTAAT  
TTAACTAGGAAAGATGCTATCTAAATTTAATAGGCTAGTGTGCTTGTGTGCTTTAATTAAGTACTATTTT  
GTTAGTTACTGGTATGCATTGAAATATTTTCCCCAAAGTAAGAACTGAAGCACATTACAAAGGACCTAA  
GTGAAAGAGATTAAAATGAAAATTTTGTGAGGAACAATATGTTAACTTTCTTGTTTGTACTGTGCTGA  
CATTTTGTAGAATTTTTTTTTAAAAATCTGTCTAGTGGGTTATTTTGTGACACACTGGGGAAGTCAAATA  
AATGTAAAATGAAAGAGATAAACTCATACTGTAGTCAGCAAGTCATGTTAGAGATACAGCAGAAAGGAGA  
ATAACTACTCTAATTGTTACAATAGCCTTCTTTCCTCATTTGCCATTCTTCCATCCTCAGTATTTTTTAC  
CCTAACATGGTTCCTTCACATCTTCCCTTTTTCATTTGTGTTTTAACCACTTAGTTTTTCATTAGTCTTTG  
ACTTTGTTTTCGTTATGAAAGTTTAAATTGGTCTCCATCCTTGGGCAGATTGATGGTTGCTTTTAAGGAA  
ATCAAGCTCCATAGTCAGTGTTTTGTATGTATCTTAGGAAAATAATTTAGATTTTAATAATTTTATCAA  
AGTGGTCTCCTTATAAATCTTCACAGTGCAAACCTAAAGTGAAAATATTTTTATTTCTCTCATTTTATT  
TACCTTTCTTTACATTTTCTATATCATAGATTATATAATATGTCAAGTTATTTTATTTGTTCTACTAAAT  
TTTCTAGCAGTTTCCATAGCCTCATCTCAGATTCACCTGTTGCAACCTATAAATAAGGACGTCTTTATTT  
TGCAAGTAACTTAATTA AAAAGGGAAAAGTTGAAAAATTA AAAGACTAATAATTTAGAAATATCTACTT  
AATGTTCAGTTTGTCTCAATTCTTACTCATTTTGTGCCATTCCTTGTTTTATTACAAAATGTTTTCTTCA  
AAAAGTACAAAATGAAAATGTGAGTACTTTTTGGTGCATTTTAGTAAGTAAAATTA AAATTCCTGCTA  
TACATATGAA

>NM\_015884.4 Homo sapiens membrane bound transcription factor peptidase, site 2 (MBTPS2), mRNA

GGCGGTAGCTTGGTTCCTGAGCGGATGCTGGGGCTGTAAGGCGCGCGCGGTGAGCTGTTGGCGGTGCAGG  
GAGGAGGACGCCGGGGCTCGCCTTCCCTCCTCTGCCGCCGCTGCCGCCATGATTCCGGTGTGCTGGTGG  
TGGTGGTGGTGGGTGGCTGGACTGTCGTCTACCTGACCGACTTGGTGCTGAAGTCATCTGTCTATTTTAA  
ACATTCTTATGAAGACTGGCTGGAAAACAACGGACTGAGCATCTCCCTTTCCACATAAGATGGCAAAC  
GCTGTTTTCAATCGTGCCTTTTACAGTTGGGGACGGCGGAAAGCAAGGATGCTTTACCAATGGTTCAATT  
TTGGAATGGTGGTTGGCGTAATTGCCATGTTTAGCTCATTTTTTCTCCTTGAAAAACGCTGATGCAGAC  
TTTGGCACAAATGATGGCTGACTCTCCCTCTTCTTATTCTTCTCCTCTTCTTCTCCTCTTCTCCTCTTCT  
TCCTCTTCTCTTCTTCATCTTCTTCTCCTCTTCTCGCTTCACAATGAACAGGTGTTACAAGTTGTGGTTC  
CTGGTATAAATTTACCCGTCAATCAACTGACCTATTTCTTCACGGCAGTTCTCATTAGTGGTGTGTACA  
TGAAATTGGACATGGGATAGCAGCTATTAGGGAACAAGTTCGATTTAATGGCTTTGGGATTTTTCTCTTC  
ATTATTTATCCTGGAGCATTTGTTGATCTGTTCACTCATTTGCAACTTATATCGCCAGTCCAGCAGC  
TAAGGATATTTTGTGCAGGTATCTGGCATAATTTTGTCTTGCACTCTTGGGTATTTTAGCTCTTGTCT  
CCTCCAGTAATTCTCTTGCCATTTTACTACACTGGAGTTGGGGTGCTCATCACTGAAGTTGCTGAGGAC  
TCTCCTGCCATTGGACCCAGAGGCCTTTTTGTGGGAGACCTTGTCACCCATCTACAGGATTGTCTGTTA  
CTAATGTGCAAGATTGGAATGAATGTTTAGATACCATCGCCTATGAGCCCCAAATTGGTTACTGTATAAG  
TGCATCAACTTTACAGCAGTTAAGTTTCCAGTTAGAGCATACAAACGACTAGATGGTTCAACTGAATGC  
TGTAACAATCACAGCCTCACAGATGTGTGCTTTTCTACAGAAATAATTTTAATAAGCGTTTGCATACAT  
GTCTTCTGCCCGGAAAGCAGTTGAAGCAACTCAAGTTTGCAGAACCAATAAAGACTGTAAAAAAGCTC  
AAGTTCAAGTTTCTGTATAATACCTTCTTTGGAACTCACACTCGCTTAATAAAAGTAAAACACCCACCT  
CAGATTGATATGTTATACGTAGGACATCCTCTGCATCTTCACTACACAGTGAGCATCACCAGTTTTATCC  
CACGTTTTAACTTTCTAAGCATAGATCTGCCAGTGGTTGTGGAGACATTTGTCAAGTACCTGATTTCCCT  
CTCAGGAGCTCTGGCTATTGTTAATGCAGTACCCTGCTTTGCTTTGGATGGACAATGGATTCTAAACTCT

TTCTTGGATGCCACCCTTACCTCAGTGATTGGAGACAATGATGTCAAAGATCTAATAGGGTTTTTTCATCT  
TGCTGGGTGGCAGTGTACTTTTGGCTGCCAATGTGACCCTGGGACTCTGGATGGTTACAGCACGGTAATG  
TTTGCACTCATCTGACAGAATCCCTGAGTTACAGTATACAGCTATGTGGTAATATTCATTGCCATTGAAA  
TTCTTACTTGGTATGAAATATAAAGTGTTTCCTTAAAATTACATCTTAGCCAACAACCCTGAGCTCCTCC  
CATATCCAGAGTACCCAACTCTGTGGTAGAAGATAAGCAGAAGAAATGAAAGGCATAGTCCCTGACTAT  
ATTCTAATTTAGGACTGAATGTACCCAGATGCTTGTGGAATAATATCTAAGCAAGTGCAAATTCATGTAA  
TACCGTTTTGTCTGATTACATATTGTGTTGAAATAGTATAAAGGAGAACAGAACTGGGTGGAATTAATTG  
GGAAAACTTCTTACAAAAGCATCATTAATCAAAATTTGAAGGAGACCAGACTTTGGCCAAGTGGAAGGA  
TGACCATTGTCTTGGCCTGTATCTCTTGTCTTTGTCTTGTGTTGAAAAGTATTTTAAACTTAATGGTGT  
ATTATTTTGTGCTCTGAAAGCTGAGGTCTGATTACAATTAGTAAAATTCTATAGAAGAATCTGCTGACGT  
GAAAGGGAAAAATCTTTGTCAAATGATACCAAATAAATGAACAAAACAGGAAGTAGGGCCTATGATATCG  
TGAGACATGTTTTGCCCCACAAGAGTTGCATCTTTTATAAGGTGTCTCTGCCCCCTCATAAAGCAGCACT  
AGCTTTGACATCCACGGTGAGCTGCAGGAAGCATCACACACCAGCAGCATGTGAGCAGAGGGAGGCAGTT  
GGGGTTGAACTTCGGAAGTAGGCCGGGTCTCCTGACAGATCACAAGACACCCCAGAGGATCTTCAGCAGT  
CCTACTTCCCATTCTCTATAGAGCTTTGAAGCTTGGAACCCTTCCAGGGTAAACATTTTCTCTTGTGCTG  
CTCAGGACATCTGGGGCCTAGCTCCTGGGTTCTGTCTCCAAGAAGCAATGACCTTAACTCTGAGCCAT  
ACTCTGTCCTCACCAGCGGCTCCCATGTTTTTCTGTGTCAGGTTATTAAGTACCTAGTCCTTGTTTTCTG  
TCTCTCTCCTAAGCTACCTCTCTGGGTCCACAGAAGACTTGGTAGTATAGTGAGAATGGCTATACGTGAG  
TACAAACGTGGATTTTCCAGGGCTTGGGAAGTATTCTTGAGCCCAGAAGAGCCACGCCTGCTTTGAGGT  
CTTTTGGAGTGGAGATGCAGCCCTGGGAAATTTGGGGAGTCAGCAGGCCAGTGTGAAGCTATTGGTCCTA  
GGAGTATATGAGCTTGCTGTTTCTTTGATGGAAAATACATGCTTCTCTTGTATACTCAGAAGTGACTAAG  
GGCAATAACTCATTAATAGCCATCTATCCAACCTCTTTACTGAGTGATGTATTCCATGGGGTTACCTTTT  
TCAGATTATTGAGTTGCTCTGTAAGCACTAAAACCTTTTAAATCATTTTTAAGAACTTTTTAGATTGTAT  
TACAAATTTGCCTTAACAGTAATTAGATGTTGAATATAATTTTAACATTTTATTAATGACTTGGGTCATC  
AGTTAATACCAGTACTAAAACCATACGAATTATTGGTTTATTCCAGAAAATACAGTATTTGTTCTATTTT

TAGGTAGACAATCATTTGGGATCAGAGTACATTAGCATAGTAATGCTCAGTCAGACCTGTTCAAGTAGTA  
GAGCTTGGAGAATGCCATGAAATACTTATATAATTAATTTGATTGCATGAACTAAGCAATTTTACTAATG  
AAAAGGTTGTATATGTGCAAGTCACTTTTTTAAAAACCAAGAAAAAACTTTAATAGAGGAAATCTTATTC  
ATTAATTTATTTTTCTGAGTAAAAAACGAAACCCAAATCTCATTTTATTTCAACTGTAAACATTTTGA  
TCTGTTGACCCATAGGATCAGGATTTGGGAACCACTTTACTAGGAAAGAGCAGATCAGTACCATTTGTAT  
AAAACCGGCCTCATTATGTAAGAAAGAAAATGTTACGTGTTTTCTCTTTAGCTTGGTTGTGGGCACTTC  
TACAGCAAGGACCATATCATATTCATCTTTGCATCCCTGGCACAGTGCATGAGACATAAGTACTTAATAA  
ATGCAGTTGAATGGATAATGATTAGTGTTATTTATGGATTAGAAAAAGCATGTTTCTATTTAAGTAAGCT  
GTAAAAAGTATTATTGAATATTTACTGTAAATATATGTTACATAAAAAAATAACTTGGAGGGTCTTTGT  
GTCCCTGGCATATTATCATCTTCATGGAAAGAATCCACTGTGGTTTCTGTAGAGTGATTGGAAAAATGGA  
TTATTTTGAGGATTGAAGAAAGTGTTCTTTCTGCGTTGTCACTTTGTCAACAGTAAAACTTTATTCTCA  
GTGTTCTACTCTGCATTGTTTACATTTTGTACAGTTTTTTTTAATCACCTACAATCTGTAAAGAATGTA  
TATATTCTTTTCAGCATCTCAGTTTGAAAAGACATGCAGTTAACTTGACCTTTTGATAATCGCTCTTAC  
AGGTCATTGTCTGTTCTAACAGCAAATTGTAAACATGTGCTTCATAGATATTGTGGCTCTCAGTCATCAC  
TTTGTCTATGGTATTTATTGAATGTTACATACTAATGGTGACAGGTGTTTTTTTCTATAAATCTTCT  
GACTGTCCTGTAATTCATTCTTAAGCTTTAACTTGAAGGTATCGTAATTGCCGGCATTGATGTTTAGCA  
ATAAAAGAATAAATGTGTACCAGCATTTTATGTTTA

>NM\_022372.6 Homo sapiens MTOR associated protein, LST8 homolog (MLST8), transcript variant 1,  
mRNA

GACTCGCTCCGGCTCCCCTCGCCGTCCTGGACACGGCGGAGTGCGGAGCCGCCCGTAAGATGCTCTGACC  
TTTGACCCCTGCCGTTTCTAGGCTCTAGGGCCCGTGCAGGCCACACCATGAACACCTCCCAGGCACGGTGGG  
CAGTGACCCGGTCATCCTGGCCACTGCAGGCTACGACCACACCGTGCCTTCTGGCAGGCCACAGCGGC  
ATCTGCACCCGGACGGTGCAGCACCAGGACTCCCAGGTGAATGCCTTGGAGGTCACACCGGACCGCAGCA

TGATTGCTGCTGCAGGTTACCAGCACATCCGCATGTATGATCTCAACTCCAATAACCCTAACCCCATCAT  
CAGCTACGACGGCGTCAACAAGAACATCGCGTCTGTGGGCTTCCACGAAGACGGCCGCTGGATGTACACG  
GGCGGCGAGGACTGCACAGCCAGGATCTGGGACCTCAGGTCCCGAACCTGCAGTGCCAGCGGATCTTCC  
AGGTGAACGCACCCATTAAGTGCCTGTCCTGCACCCCAACCAGGCAGAGCTCATCGTGGGTGACCAGAG  
CGGGGCTATCCACATCTGGGACTTGAAAACAGACCACAACGAGCAGCTGATCCCTGAGCCCCGAGGTCTCC  
ATCACGTCCGCCCACATCGATCCCGACGCCAGCTACATGGCAGCTGTCAATAGCACCGGAAACTGCTATG  
TCTGGAATCTGACGGGGGGCATTGGTGACGAGGTGACCCAGCTCATCCCCAAGACTAAGATCCCTGCCCCA  
CACGCGCTACGCCCTGCAGTGTGCTTCAGCCCCGACTCCACGCTCCTCGCCACCTGCTCGGCTGATCAG  
ACGTGCAAGATCTGGAGGACGTCCAATTCTCCCTGATGACGGAGCTGAGCATCAAGAGCGGCAACCCCG  
GGGAGTCTCCCGCGGCTGGATGTGGGGCTGCGCCTTCTCGGGGGACTCCCAGTACATCGTCACTGCTTC  
CTCGGACAACCTGGCCCGGCTCTGGTGTGTGGAGACTGGAGAGATCAAGAGAGAGTATGGCGGCCACCAG  
AAGGCTGTTGTCTGCCTGGCCTTCAATGACAGTGTGCTGGGCTAGCCTGTGACCCCTCGGGACTGCCTGG  
TGCAGGTGGTGGCAGCTGGAGGGACCCATGCAGCACCCAGGTCAGAGCAGACCCTCCCCTGCCGGCCTGC  
GCCAGCTGGACCTGATGGCCCCCTGTGGCGCCTTGACCTGCTGGGCCAGGCTGCCCTGGGACTCTCAGCC  
CCCAGTTGCTTATCCAGATGTGACAGAGCTCGACCCAAGCCAGGCTGCACACTCCTGGACTGGGCTAGCC  
TGCACTGCCTGGGAAAGTCGGCCGAGGGGCCAAAGCTGCTGAGGGGTCTGAGGCTGGTGCCACCCCCAA  
GCTAGTGTGTTCTCTGCCCCTCCCTGCCCCGCTTTAGGGCCTCGGTCCATAGAGAACACCACCACCATG  
GCCAGGTGGAAGGGTTTATTAGTCCCTGCCAGCAGCTGTCTCCCTGGTGCAGGTGGCCTGGCCAGCCCA  
CTGGATTGGGGACGGGCCAGGCTGGGCCAGGTCGGGGGCTCAGTCTGGGAGGTAATAAAAGCAGACCGAC  
ACGCAGATGTTGCTCGGGAAGCAGATGTCGATGCAGAGATAAATCAGCCGCTGTCTCCGGG

>NM\_022485.5 Homo sapiens myotubularin related protein 14 (MTMR14), transcript variant 3, mRNA

AGGTTCTAGTGTGCGAGTTGGGTGCAGGCAGGTGCCATGGGCCCGCTTGAGGCACACTGAGGGGACGCGG  
GGCTGGGCCATGGCCGGCGCTCGGGCCGCCGCCCGCTGCCTCGGCGGGGTCTCGGCCTCTTCAGGCA

ACCAGCCGCTCAGGAGCTGGGGCTTGGGGAGCTGCTGGAGGAGTTCTCCCGGACTCAGTACCGGGCCAA  
GGATGGCAGCGGGACCGGCGGCTCTAAGGTTGAGCGCATTGAGAAGAGATGTCTGGAGCTGTTTGGCCGA  
GACTACTGTTTCAGCGTGATTCCAAACACGAATGGGGATATCTGTGGCCACTATCCCCGGCACATCGTGT  
TCCTGGAGTATGAGAGTTCTGAGAAGGAGAAAGACACGTTTGAGAGTACCGTACAGGTGAGCAAGTTGCA  
AGACCTCATCCACCGCAGCAAGATGGCCCGGTGCAGAGGACGGTTTGTCTGCCAGTAATCCTGTTCAAG  
GGCAAGCACATTTGCAGGTCGGCCACACTGGCTGGATGGGGAGAGCTGTATGGACGCTCAGGCTACAAC  
ATTTTTTCTCAGGGGGTGCAGATGATGCCTGGGCAGATGTGGAGGACGTCACGGAGGAGGACTGTGCTCT  
TCGAAGTGGTGACACGCATCTTTTTGATAAGGTCAGAGGCTATGACATCAAGCTGCTTCGATACCTGTCA  
GTCAAATACATCTGTGACCTGATGGTGGAGAACAAGAAGGTGAAGTTTGGCATGAATGTAACCTCCTCTG  
AGAAGGTGGACAAAGCCCAGCGCTATGCCGACTTCACTCTCCTCTCCATCCCGTATCCAGGCTGTGAATT  
TTTCAAGGAATATAAAGATCGGGATTACATGGCAGAAGGGCTCATATTTAACTGGAAGCAGGACTACGTT  
GATGCCCCATTGAGCATCCCCGACTTCCTGACTCACTCTCTGAACATTGACTGGAGCCAGTATCAGTGTT  
GGGATCTGGTGCAACAAACACAAAACACTACCTGAAGCTGCTGCTTTCCTTAGTTAACAGTGATGATGACAG  
CGGGCTGCTGGTACACTGTATCTCAGGCTGGGATCGGACCCCCCTTTCATCTCCCTCCTGCGCCTTTC  
TTGTGGGCTGATGGGCTCATCCACACGTCCCTGAAGCCCACTGAGATCCTCTACCTCACTGTGGCCTATG  
ACTGGTTCCTCTTCGGGCACATGTTGGTAGATCGGCTCAGCAAAGGGGAGGAGATTTTCTTCTTCTGCTT  
CAATTTTTTTGAAGCATATTACCTCCGAGGAGTTCTCTGCTCTGAAGACCCAGAGGAGGAAGAGTTTGCCA  
GCCCCGGATGGAGGCTTCACCCTGGAAGACATCTGCATGCTGAGACGAAAGGACCGTGGCAGCACCA  
GCCTTGGCAGCGACTTCTCCCTGGTCATGGAGAGTTCCCCAGGAGCCACTGGGAGCTTCACCTATGAGGC  
CGTGGAGCTGGTCCCAGCAGGAGCGCCAACTCAGGCAGCTTGGCTTGCAGCCCTGAGTGATCGAGAGACT  
CGGCTGCAGGAGGTGCGCTCAGCCTTCTTGCTGCGTACAGCAGCACAGTGGGGCTTCGGGCAGTAGCCC  
CCAGTCCTTCCGGTGCCATCGGGGGCCTGCTGGAGCAATTTGCCCGTGGTGTTGGACTCCGGAGCATCAG  
CAGCAATGCCTTGTGAAGAAGCCAGCCCATGACATTTTCTGCTCCTCTCTCAGCTGAGCCCTTAGCAGA  
GAATCAAAGCCATGCCTGGCCGAAGGGGTACTTCCAGGTCAGGGGAAATTTAGTCCCCCATCTCCATCA  
TGAACATGGCAGCCCCAAAGCTGAGCAAGGCCAAAGACAGGGTTTTCCAACCCCCAGCCTCTTGACTGGT

GACCACCACCCCTTCTTGCTCACTGTCTCCACCCACCCCATCTTTGCTGGGATTCCCATCAACTCTCAGA  
ACTGTGTGGGGTTTCCCTGGGGCCTTGTGGAAGCCATGACTTCACAAAGACCCTACCTGTCAGTTCTTGT  
TTCTGGGGAGGAGGGATCACCTGCACTGAGAATGAGGCAGTTTGACACAGATCACAAAATAAAATCAAAG  
TCTTTTGAATAGCCA

>NM\_004958.4 Homo sapiens mechanistic target of rapamycin kinase (MTOR), transcript variant 1,  
mRNA

GCTCCCGGCTTAGAGGACAGCGGGGAAGGCGGGCGGTGGGGCAGGGGGCCTGAAGCGGCGGTACCGGTGC  
TGGCGGCGGCAGCTGAGGCCTTGCCGAAGCCGCGCGAACCTCAGGGCAAGATGCTTGGAACCGGACCTG  
CCGCCGCCACCACCGCTGCCACCACATCTAGCAATGTGAGCGTCCTGCAGCAGTTTGCCAGTGGCCTAAA  
GAGCCGGAATGAGGAAACCAGGGCCAAAGCCGCCAAGGAGCTCCAGCACTATGTCACCATGGAACCTCCGA  
GAGATGAGTCAAGAGGAGTCTACTCGCTTCTATGACCAACTGAACCATCACATTTTTGAATTGGTTTCCA  
GCTCAGATGCCAATGAGAGGAAAGGTGGCATCTTGCCATAGCTAGCCTCATAGGAGTGGAAGGTGGGAA  
TGCCACCCGAATTGGCAGATTTGCCAACTATCTTCGGAACCTCCTCCCCTCCAATGACCCAGTTGTCATG  
GAAATGGCATCCAAGGCCATTGGCCGTCTTGCCATGGCAGGGGACACTTTTACCGCTGAGTACGTGGAAT  
TTGAGGTGAAGCGAGCCCTGGAATGGCTGGGTGCTGACCGCAATGAGGGCCGGAGACATGCAGCTGTCCT  
GGTTCTCCGTGAGCTGGCCATCAGCGTCCCTACCTTCTTCTCCAGCAAGTGCAACCCTTCTTTGACAAC  
ATTTTTGTGGCCGTGTGGGACCCCAAACAGGCCATCCGTGAGGGAGCTGTAGCCGCCCTTCGTGCCTGTC  
TGATTCTCACAACCCAGCGTGAGCCGAAGGAGATGCAGAAGCCTCAGTGGTACAGGCACACATTTGAAGA  
AGCAGAGAAGGGATTTGATGAGACCTTGCCAAAGAGAAGGGCATGAATCGGGATGATCGGATCCATGGA  
GCCTTGTTGATCCTTAACGAGCTGGTCCGAATCAGCAGCATGGAGGGAGAGCGTCTGAGAGAAGAAATGG  
AAGAAATCACACAGCAGCAGCTGGTACACGACAAGTACTGCAAAGATCTCATGGGCTTCGGAACAAAACC  
TCGTCACATTACCCCTTCACCAAGTTTCCAGGCTGTACAGCCCCAGCAGTCAAATGCCTTGGTGGGGCTG  
CTGGGGTACAGCTCTACCAAGGCCTCATGGGATTTGGGACCTCCCCAGTCCAGCTAAGTCCACCCTGG  
TGGAGAGCCGGTGTTGCAGAGACTTGATGGAGGAGAAATTTGATCAGGTGTGCCAGTGGGTGCTGAAATG

CAGGAATAGCAAGAACTCGCTGATCCAAATGACAATCCTTAATTTGTTGCCCCGCTTGGCTGCATTCCGA  
CCTTCTGCCTTCACAGATACCCAGTATCTCCAAGATACCATGAACCATGTCCTAAGCTGTGTCAAGAAGG  
AGAAGGAACGTACAGCGGCCTTCCAAGCCCTGGGGCTACTTTCTGTGGCTGTGAGGTCTGAGTTTAAGGT  
CTATTTGCCTCGCGTGCTGGACATCATCCGAGCGGCCCTGCCCCAAAGGACTTCGCCCATAAGAGGCAG  
AAGGCAATGCAGGTGGATGCCACAGTCTTCACTTGCATCAGCATGCTGGCTCGAGCAATGGGGCCAGGCA  
TCCAGCAGGATATCAAGGAGCTGCTGGAGCCCATGCTGGCAGTGGGACTAAGCCCTGCCCTCACTGCAGT  
GCTCTACGACCTGAGCCGTGAGATTCCACAGCTAAAGAAGGACATTCAAGATGGGCTACTGAAAATGCTG  
TCCCTGGTCCTTATGCACAAACCCCTTCGCCACCCAGGCATGCCCAAGGGCCTGGCCCATCAGCTGGCCT  
CTCCTGGCCTCACGACCCTCCCTGAGGCCAGCGATGTGGGCAGCATCACTCTGCCCTCCGAACGCTTGG  
CAGCTTTGAATTTGAAGGCCACTCTCTGACCCAATTTGTTGCCACTGTGCGGATCATTTCTGAACAGT  
GAGCACAAGGAGATCCGCATGGAGGCTGCCCCGACCTGCTCCCGCCTGCTCACACCCTCCATCCACCTCA  
TCAGTGGCCATGCTCATGTGGTTAGCCAGACCGCAGTGCAAGTGGTGGCAGATGTGCTTAGCAAAGTCT  
CGTAGTTGGGATAACAGATCCTGACCCTGACATTCGCTACTGTGTCTTGGCGTCCCTGGACGAGCGCTTT  
GATGCACACCTGGCCCAGGCGGAGAACTTGCAAGCCTTGTTTGTGGCTCTGAATGACCAGGTGTTTGAGA  
TCCGGGAGCTGGCCATCTGCACTGTGGGCCGACTCAGTAGCATGAACCCTGCCTTTGTCATGCCTTTCCT  
GCGCAAGATGCTCATCCAGATTTTGACAGAGTTGGAGCACAGTGGGATTGGAAGAATCAAAGAGCAGAGT  
GCCCCGATGCTGGGGCACCTGGTCTCCAATGCCCCCGACTCATCCGCCCTACATGGAGCCTATTCTGA  
AGGCATTAATTTGAAACTGAAAGATCCAGACCCTGATCCAAACCCAGGTGTGATCAATAATGTCCTGGC  
AACAATAGGAGAATTGGCACAGGTTAGTGGCCTGGAAATGAGGAAATGGGTTGATGAACTTTTTATTATC  
ATCATGGACATGCTCCAGGATTCCTCTTTGTTGGCCAAAAGGCAGGTGGCTCTGTGGACCCTGGGACAGT  
TGGTGGCCAGCACTGGCTATGTAGTAGAGCCCTACAGGAAGTACCCTACTTTGCTTGAGGTGCTACTGAA  
TTTTCTGAAGACTGAGCAGAACCAGGGTACACGCAGAGAGGCCATCCGTGTGTTAGGGCTTTTAGGGGCT  
TTGGATCCTTACAAGCACAAAGTGAACATTGGCATGATAGACCAGTCCCGGGATGCCTCTGCTGTCAGCC  
TGTCAGAATCCAAGTCAAGTCAGGATTCCTCTGACTATAGCACTAGTGAAATGCTGGTCAACATGGGAAA  
CTTGCCTCTGGATGAGTTCTACCCAGCTGTGTCCATGGTGGCCCTGATGCGGATCTTCCGAGACCAGTCA

CTCTCTCATCATCACACCATGGTTGTCCAGGCCATCACCTTCATCTTCAAGTCCCTGGGACTCAAATGTG  
TGCAGTTCTGCCCCAGGTCATGCCACGTTCTTAACGTCATTGAGTCTGTGATGGGGCCATCCGGGA  
ATTTTGTTCAGCAGCTGGGAATGTTGGTGTCTTTGTGAAGAGCCACATCAGACCTTATATGGATGAA  
ATAGTACCCTCATGAGAGAATTCTGGGTCATGAACACCTCAATTCAGAGCACGATCATTCTTCTCATTG  
AGCAAATTGTGGTAGCTCTTGGGGGTGAATTTAAGCTCTACCTGCCCCAGCTGATCCCACACATGCTGCG  
TGTCTTCATGCATGACAACAGCCCAGGCCGATTGTCTCTATCAAGTTACTGGCTGCAATCCAGCTGTTT  
GGCGCCAACCTGGATGACTACCTGCATTTACTGCTGCCTCCTATTGTTAAGTTGTTTGATGCCCTGAAG  
CTCCACTGCCATCTCGAAAGGCAGCGCTAGAGACTGTGGACCGCCTGACGGAGTCCCTGGATTTCACTGA  
CTATGCCTCCCGGATCATTACCCCTATTGTTGAACTGGACCAGAGCCCAGAACTGCGCTCCACAGCC  
ATGGACACGCTGTCTTCACTTGTTTTTCAGCTGGGGAAGAAGTACCAAATTTTCATTCCAATGGTGAATA  
AAGTTCTGGTGCAGACACCGAATCAATCATCAGCGCTATGATGTGCTCATCTGCAGAATTGTCAAGGGATA  
CACACTTGCTGATGAAGAGGAGGATCCTTTGATTTACCAGCATCGGATGCTTAGGAGTGGCCAAGGGGAT  
GCATTGGCTAGTGGACCAAGTGGAAACAGGACCCATGAAGAACTGCACGTCAGCACCATCAACCTCCAAA  
AGGCCTGGGGCGCTGCCAGGAGGGTCTCAAAGATGACTGGCTGGAATGGCTGAGACGGCTGAGCCTGGA  
GCTGCTGAAGGACTCATCATCGCCCTCCCTGCGCTCCTGCTGGGCCCTGGCACAGGCCTACAACCCGATG  
GCCAGGGATCTCTTCAATGCTGCATTTGTGTCCTGCTGGTCTGAACTGAATGAAGATCAACAGGATGAGC  
TCATCAGAAGCATCGAGTTGGCCCTCACCTCACAAGACATCGCTGAAGTCACACAGACCCTCTTAACTT  
GGCTGAATTCATGGAACACAGTGACAAGGGCCCCCTGCCACTGAGAGATGACAATGGCATTGTTCTGCTG  
GGTGAGAGAGCTGCCAAGTGCCGAGCATATGCCAAAGCACTACACTACAAAGAACTGGAGTTCCAGAAAG  
GCCCCACCCCTGCCATTCTAGAATCTCTCATCAGCATTAAATAAAGCTACAGCAGCCGGAGGCAGCGGC  
CGGAGTGTTAGAATATGCCATGAAACACTTTGGAGAGCTGGAGATCCAGGCTACCTGGTATGAGAACTG  
CACGAGTGGGAGGATGCCCTTGTGGCCTATGACAAGAAAATGGACACCAACAAGGACGACCCAGAGCTGA  
TGCTGGGCCGCATGCGCTGCCTCGAGGCCTTGGGGGAATGGGGTCAACTCCACCAGCAGTGCTGTGAAAA  
GTGGACCCTGGTTAATGATGAGACCCAAGCCAAGATGGCCCGGATGGCTGCTGCAGCTGCATGGGGTTTA  
GGTCAGTGGGACAGCATGGAAGAATACACCTGTATGATCCCTCGGGACACCCATGATGGGGCATTTTATA

GAGCTGTGCTGGCACTGCATCAGGACCTCTTCTCCTTGGCACAACAGTGCATTGACAAGGCCAGGGACCT  
GCTGGATGCTGAATTAAGTGCATGGCAGGAGAGAGTTACAGTCGGGCATATGGGGCCATGGTTTCTTGC  
CACATGCTGTCCGAGCTGGAGGAGGTTATCCAGTACAACTTGTCCCCGAGCGACGAGAGATCATCCGCC  
AGATCTGGTGGGAGAGACTGCAGGGCTGCCAGCGTATCGTAGAGGACTGGCAGAAAATCCTTATGGTGCG  
GTCCCTTGTTGCTCAGCCCTCATGAAGACATGAGAACCTGGCTCAAGTATGCAAGCCTGTGCGGCAAGAGT  
GGCAGGCTGGCTCTTGCTCATAAACTTTAGTGTTGCTCCTGGGAGTTGATCCGTCTCGGCAACTTGACC  
ATCCTCTGCCAACAGTTCACCTCAGGTGACCTATGCCTACATGAAAAACATGTGGAAGAGTGCCCGCAA  
GATCGATGCCTTCCAGCACATGCAGCATTTTGTCCAGACCATGCAGCAACAGGCCCAGCATGCCATCGCT  
ACTGAGGACCAGCAGCATAAGCAGGAACTGCACAAGCTCATGGCCCGATGCTTCCTGAACTTGGAGAGT  
GGCAGCTGAATCTACAGGGCATCAATGAGAGCACAATCCCCAAAGTGCTGCAGTACTACAGCGCCGCCAC  
AGAGCACGACCGCAGCTGGTACAAGGCCTGGCATGCGTGGGCAGTGATGAACTTCGAAGCTGTGCTACAC  
TACAAACATCAGAACCAAGCCCGCGATGAGAAGAAGAACTGCGTCATGCCAGCGGGGCCAACATCACCA  
ACGCCACCACTGCCGCCACCACGGCCGCCACTGCCACCACCACTGCCAGCACCGAGGGCAGCAACAGTGA  
GAGCGAGGCCGAGAGCACCGAGAACAGCCCCACCCCATCGCCGCTGCAGAAGAAGGTCACTGAGGATCTG  
TCCAAAACCTCCTGATGTACACGGTGCCTGCCGTCCAGGGCTTCTCCGTTCCATCTCCTTGTCACGAG  
GCAACAACCTCCAGGATACACTCAGAGTTCTCACCTTATGGTTTGATTATGGTCACTGGCCAGATGTCAA  
TGAGGCCTTAGTGGAGGGGGTGAAAGCCATCCAGATTGATACCTGGCTACAGGTTATACCTCAGCTCATT  
GCAAGAATTGATACGCCCAGACCCTTGGTGGGACGTCTCATTACCAGCTTCTCACAGACATTGGTCGGT  
ACCACCCCCAGGCCCTCATCTACCACTGACAGTGGCTTCTAAGTCTACCACGACAGCCCGGCACAATGC  
AGCCAACAAGATTCTGAAGAACATGTGTGAGCACAGCAACACCCTGGTCCAGCAGGCCATGATGGTGAGC  
GAGGAGCTGATCCGAGTGGCCATCCTCTGGCATGAGATGTGGCATGAAGGCCTGGAAGAGGCATCTCGTT  
TGTACTTTGGGGAAAGGAACGTGAAAGGCATGTTTGAGGTGCTGGAGCCCTTGCATGCTATGATGGAACG  
GGGCCCCCAGACTCTGAAGGAAACATCCTTTAATCAGGCCTATGGTCGAGATTTAATGGAGGCCCAAGAG  
TGGTGCAGGAAGTACATGAAATCAGGGAATGTCAAGGACCTCACCAAGCCTGGGACCTCTATTATCATG  
TGTTCCGACGAATCTCAAAGCAGCTGCCTCAGCTCACATCCTTAGAGCTGCAATATGTTTCCCCAAAAC

TCTGATGTGCCGGGACCTTGAATTGGCTGTGCCAGGAACATATGACCCCAACCAGCCAATCATTGCGATT  
CAGTCCATAGCACCGTCTTTGCAAGTCATCACATCCAAGCAGAGGCCCCGAAATTGACACTTATGGGCA  
GCAACGGACATGAGTTTGTTCCTTCTAAAAGGCCATGAAGATCTGCGCCAGGATGAGCGTGTGATGCA  
GCTCTTCGGCCTGGTTAACACCCTTCTGGCCAATGACCCAACATCTCTTCGGAAAAACCTCAGCATCCAG  
AGATACGCTGTCATCCCTTTATCGACCAACTCGGGCCTCATTGGCTGGGTTCCCCACTGTGACACACTGC  
ACGCCCTCATCCGGGACTACAGGGAGAAGAAGAAGATCCTTCTCAACATCGAGCATCGCATCATGTTGCG  
GATGGCTCCGGACTATGACCACTTGACTCTGATGCAGAAGGTGGAGGTGTTTGAGCATGCCGTCAATAAT  
ACAGCTGGGGACGACCTGGCCAAGCTGCTGTGGCTGAAAAGCCCCAGCTCCGAGGTGTGGTTTGACCGAA  
GAACCAATTATACCCGTTCTTTAGCGGTCATGTCAATGGTTGGGTATATTTTAGGCCTGGGAGATAGACA  
CCCATCCAACCTGATGCTGGACCGTCTGAGTGGGAAGATCCTGCACATTGACTTTGGGGACTGCTTTGAG  
GTTGCTATGACCCGAGAGAAGTTTCCAGAGAAGATTCCATTTAGACTAACAAGAATGTTGACCAATGCTA  
TGGAGGTTACAGGCCTGGATGGCAACTACAGAATCACATGCCACACAGTGATGGAGGTGCTGCGAGAGCA  
CAAGGACAGTGTCATGGCCGTGCTGGAAGCCTTTGTCTATGACCCCTTGCTGAACTGGAGGCTGATGGAC  
ACAAATACCAAAGGCAACAAGCGATCCCGAACGAGGACGGATTCTACTCTGCTGGCCAGTCAGTCGAAA  
TTTTGGACGGTGTGGAAGTTGGAGAGCCAGCCCATAAGAAAACGGGGACCACAGTGCCAGAATCTATTCA  
TTCTTTCATTGGAGACGGTTTGGTGAAACCAGAGGCCCTAAATAAGAAAGCTATCCAGATTATTAACAGG  
GTTGAGATAAGCTCACTGGTCGGGACTTCTCTCATGATGACACTTTGGATGTTCCAACGCAAGTTGAGC  
TGCTCATCAAACAAGCGACATCCCATGAAAACCTCTGCCAGTGCTATATTGGCTGGTGGCCTTTCTGGTA  
ACTGGAGGCCAGATGTGCCCATCACGTTTTTCTGAGGCTTTTGTACTTTAGTAAATGCTTCCACTAAA  
CTGAAACCATGGTGAGAAAGTTTGACTTTGTAAATATTTTGAAATGTAAATGAAAAGAACTACTGTATA  
TTAAAAGTTGGTTTGAACCAACTTTCTAGCTGCTGTTGAAGAATATATTGTCAGAAACACAAGGCTTGAT  
TTGGTTCCCAGGACAGTGAAACATAGTAATACCACGTAAATCAAGCCATTCATTTGGGGAACAGAAGAT  
CCATAACTTTAGAAATACGGGTTTTGACTTAACTCACAAGAGAACTCATCATAAGTACTTGCTGATGGAA  
GAATGACCTAGTTGCTCCTCTCAACATGGGTACAGCAAACCTCAGCACAGCCAAGAAGCCTCAGGTCGTGG  
AGAACATGGATTAGGATCCTAGACTGTAAAGACACAGAAGATGCTGACCTCACCCCTGCCACCTATCCCA

AGACCTCACTGGTCTGTGGACAGCAGCAGAAATGTTTGCAAGATAGGCCAAAATGAGTACAAAAGGTCTG  
TCTTCCATCAGACCCAGTGATGCTGCGACTCACACGCTTCAATTCAAGACCTGACCGCTAGTAGGGAGGT  
TTATTCAGATCGCTGGCAGCCTCGGCTGAGCAGATGCACAGAGGGGATCACTGTGCAGTGGGACCACCT  
CACTGGCCTTCTGCAGCAGGGTTCTGGGATGTTTTCACTGGTCAAATACTCTGTTTAGAGCAAGGGCTC  
AGAAAACAGAAATACTGTCATGGAGGTGCTGAACACAGGGAAGGTCTGGTACATATTGGAATTATGAGC  
AGAACAAATACTCAACTAAATGCACAAAGTATAAAGTGTAGCCATGTCTAGACACCATGTTGTATCAGAA  
TAATTTTTGTGCCAATAAATGACATCAGAATTTTAAACATA

>NM\_001354870.1 Homo sapiens MYC proto-oncogene, bHLH transcription factor (MYC), transcript  
variant 2, mRNA

GGAGTTTATTCATAACGCGCTCTCCAAGTATACGTGGCAATGCGTTGCTGGGTATTTAATCATTCTAG  
GCATCGTTTTCTCCTTATGCCTCTATCATTCTCCCTATCTACACTAACATCCCACGCTCTGAACGCGC  
GCCATTAATACCCTTCTTCTCCTCCACTCTCCCTGGGACTCTTGATCAAAGCGCGGCCCTTTCCCAGCC  
TTAGCGAGGCGCCCTGCAGCCTGGTACGCGCGTGGCGTGGCGGTGGGCGCGCAGTGC GTTCTCGGTGTGG  
AGGGCAGCTGTTCCGCCTGCGATGATTTATACTCACAGGACAAGGATGCGGTTTGTCAAACAGTACTGCT  
ACGGAGGAGCAGCAGAGAAAGGGAGAGGGTTTGAGAGGGAGCAAAGAAAATGGTAGGCGCGCGTAGTTA  
ATTCATGCGGCTCTCTTACTCTGTTTACATCCTAGAGCTAGAGTGCTCGGCTGCCCGGCTGAGTCTCCTC  
CCCACCTTCCCCACCCTCCCCACCCTCCCCATAAGCGCCCCTCCCGGGTTCCCAAAGCAGAGGGCGTGGG  
GGAAAAGAAAAAAGATCCTCTCTCGCTAATCTCGCCACCGGCCCTTTATAATGCGAGGGTCTGGACGG  
CTGAGGACCCCCGAGCTGTGCTGCTCGCGGCCGCCACCGCCGGGCCCCGGCGTCCCTGGCTCCCCTCCT  
GCCTCGAGAAGGGCAGGGCTTCTCAGAGGCTTGGCGGGAAAAAGAACGGAGGGAGGGATCGCGCTGAGTA  
TAAAAGCCGGTTTTTCGGGGCTTTATCTAACTCGCTGTAGTAATTCCAGCGAGAGGCAGAGGGAGCGAGCG  
GGCGGCCGGCTAGGGTGGAAGAGCCGGGCGAGCAGAGCTGCGCTGCGGGCGTCTCTGGGAAGGGAGATCCG  
GAGCGAATAGGGGGCTTCGCTCTGGCCCAGCCCTCCCGCTGATCCCCAGCCAGCGGTCCGCAACCCCT

GCCGCATCCACGAACTTTGCCCATAGCAGCGGGCGGGCACTTTGCACTGGAACTTACAACACCCGAGCA  
AGGACGCGACTCTCCCGACGCGGGGAGGCTATTCTGCCATTTGGGGACACTTCCCCGCCGCTGCCAGGA  
CCCGCTTCTCTGAAAGGCTCTCCTTGACGCTGCTTAGACGCTGGATTTTTTTCGGGTAGTGGAACCAG  
CCTCCCGCGACGATGCCCCTCAACGTTAGCTTCACCAACAGGAACTATGACCTCGACTACGACTCGGTGC  
AGCCGTATTTCTACTGCGACGAGGAGGAGAACTTCTACCAGCAGCAGCAGCAGAGCGAGCTGCAGCCCC  
GGCGCCAGCGAGGATATCTGGAAGAAATTCGAGCTGCTGCCACCCCGCCCCTGTCCCCTAGCCGCCG  
TCCGGGCTCTGCTCGCCCTCTACGTTGCGGTACACCCCTTCTCCCTTCGGGGAGACAACGACGGCGGTG  
GCGGGAGCTTCTCCACGGCCGACCAGCTGGAGATGGTGACCGAGCTGCTGGGAGGAGACATGGTGAACCA  
GAGTTTCATCTGCGACCCGGACGACGAGACCTTCATCAAAAACATCATCATCCAGGACTGTATGTGGAGC  
GGCTTCTCGGCCGCCGCAAGCTCGTCTCAGAGAAGCTGGCCTCTACCAGGCTGCGCGCAAAGACAGCG  
GCAGCCCGAACCCCGCCCGCGGCCACAGCGTCTGCTCCACCTCCAGCTTGACCTGCAGGATCTGAGCGC  
CGCCGCCTCAGAGTGCATCGACCCCTCGGTGGTCTTCCCCTACCCTCTCAACGACAGCAGCTCGCCCAAG  
TCCTGCGCCTCGCAAGACTCCAGCGCCTTCTCTCCGTCTCGGATTCTCTGCTCTCCTCGACGGAGTCCT  
CCCCGCAGGGCAGCCCCGAGCCCCTGGTGCTCCATGAGGAGACACCGCCCACCACCAGCAGCGACTCTGA  
GGAGGAACAAGAAGATGAGGAAGAAATCGATGTTGTTTCTGTGGAAGAGGCAGGCTCCTGGCAAAAGG  
TCAGAGTCTGGATCACCTTCTGCTGGAGGCCACAGCAAACCTCCTCACAGCCCACTGGTCCTCAAGAGGT  
GCCACGTCTCCACACATCAGCACAACTACGCAGCGCCTCCCTCCACTCGGAAGGACTATCCTGCTGCCAA  
GAGGGTCAAGTTGGACAGTGTGAGAGTCTGAGACAGATCAGCAACAACCGAAAATGCACCAGCCCCAGG  
TCCTCGGACACCGAGGAGAATGTCAAGAGGCGAACACACAACGTCTTGAGCGCCAGAGGAGGAACGAGC  
TAAACGGAGCTTTTTTGCCCTGCGTGACCAGATCCCGGAGTTGGAAAACAATGAAAAGGCCCCCAAGGT  
AGTTATCCTTAAAAAAGCCACAGCATAACCTGTCCGTCCAAGCAGAGGAGCAAAAGCTCATTTCTGAA  
GAGGACTTGTTGCGGAAACGACGAGAACAGTTGAAACACAACTTGAACAGCTACGGAACCTTGTGCGT  
AAGGAAAAGTAAGGAAAACGATTCTTCTAACAGAAATGTCCTGAGCAATCACCTATGAACTTGTTTCAA  
ATGCATGATCAAATGCAACCTCACAACCTTGGCTGAGTCTTGAGACTGAAAGATTTAGCCATAATGTAA  
CTGCCTCAAATTGGACTTTGGGCATAAAAGAACTTTTTATGCTTACCATCTTTTTTTTTCTTTAACAG

ATTTGTATTTAAGAATTGTTTTAAAAAATTTAAGATTACACAATGTTTCTCTGTAAATATTGCCATT  
AAATGTAAATAACTTTAATAAAACGTTTATAGCAGTTACACAGAATTTCAATCCTAGTATATAGTACCTA  
GTATTATAGGTACTATAAACCTAATTTTTTTTATTTAAGTACATTTTGCTTTTAAAGTTGATTTTTT  
CTATTGTTTTTAGAAAAATAAAATAACTGGCAAATATATCATTGAGCCAAATCTTAAGTTGTGAATGTT  
TTGTTTCGTTTCTTCCCCCTCCAACCACCACCATCCCTGTTTGTTTCATCAATTGCCCTTCAGAGGG  
TGGTCTTAAGAAAGGCAAGAGTTTTCTCTGTTGAAATGGGTCTGGGGGCCTTAAGGTCTTTAAGTTCTT  
GGAGGTTCTAAGATGCTTCCTGGAGACTATGATAACAGCCAGAGTTGACAGTTAGAAGGAATGGCAGAAG  
GCAGGTGAGAAGGTGAGAGGTAGGCAAAGGAGATACAAGAGGTCAAAGGTAGCAGTTAAGTACACAAAGA  
GGCATAAGGACTGGGGAGTTGGGAGGAAGGTGAGGAAGAACTCCTGTTACTTTAGTTAACCAGTGCCAG  
TCCCCTGCTCACTCAAACCCAGGAATTCTGCCAGTTGATGGGGACACGGTGGGAACCAGCTTCTGCTG  
CCTTCACAACCAGGCGCCAGTCCTGTCCATGGGTTATCTCGCAAACCCAGAGGATCTCTGGGAGGAATG  
CTACTATTAACCTATTTACAAACAAGGAAATAGAAGAGCTCAAAGAGGTTATGTAACCTATCTGTAGC  
CACGCAGATAATACAAAGCAGCAATCTGGACCCATTCTGTTCAAACACTTAACCTTCGCTATCATGCC  
TTGGTTCATCTGGGTCTAATGTGCTGAGATCAAGAAGGTTTAGGACCTAATGGACAGACTCAAGTCATAA  
CAATGCTAAGCTCTATTTGTGTCCCAAGCACTCCTAAGCATTTTATCCCTAACTCTACATCAACCCATG  
AAGGAGATACTGTTGATTTCCCATATTAGAAGTAGAGAGGGAAGCTGAGGCACACAAAGACTCATCCAC  
ATGCCCAAGATTCAGTATAGGGAAAAGTGGAAGCGAGATTTGAACCCAGGCTGTTTACTCCTAACCTGT  
CCAAGCCACCTCTCAGACGACGGTAGGAATCAGCTGGCTGCTTGTGAGTACAGGAGTTACAGTCCAGTGG  
GTTATGTTTTTTAAGTCTCAACATCTAAGCCTGGTCAGGCATCAGTTCCCCTTTTTTTGTGATTTATTTT  
GTTTTATTTTGTGTTTCATTGTTTAATTTTCCTTTTACAATGAGAAGGTCACCATCTTGACTCCTACC  
TTAGCCATTTGTTGAATCAGACTCATGACGGCTCCTGGGAAGAAGCCAGTTCAGATCATAAAATAAAACA  
TATTTATTCTTTGTCATGGGAGTCATTATTTAGAACTACAACTCTCCTTGCTTCCATCCTTTTTTAC  
ATACTCATGACACATGCTCATCCTGAGTCCTTGAAAAGGTATTTTTGAACATGTGTATTAATTATAAGCC  
TCTGAAAACCTATGGCCCAAACCAGAAATGATGTTGATTATATAGGTAAATGAAGGATGCTATTGCTGTT  
CTAATTACCTCATTGTCTCAGTCTCAAAGTAGGTCTTCAGCTCCCTGTACTTTGGGATTTTAATCTACCA

CCACCCATAAATCAATAAATAATTACTTTCTTTGA

>NM\_138386.3 Homo sapiens nuclear assembly factor 1 ribonucleoprotein (NAF1), transcript variant 1, mRNA

GTGTCTTTTGGCTCCTCCGCGTGTAGTTACCTGAGAAACGCGGGAAGTTGGGCCAGGCAGTGTGCTGC  
GGTTGCCTAAGTTGTTTTCTATTTCTGGAGAGAGCCGTGAGCTTGTCCAGGGGCCCCAATCCTGAGGCC  
GACCCGGTTTCTGGCGCGGTGCGATGGAGGTAGTGGAGGCCGCCGCGCTCAGCTGGAAACTCTGAAATT  
CAATGGCACCGACTTTGGAGTTGGGGAAGGTCCGGCGGCTCCGTCTCCGGGCTCTGCCCTGTGCCAGGG  
ACACAGCCGCCGCTACAGTCGTTTGAGGGGTCCCCGGACGCTGGGCAGACCGTGGAGGTTAAGCCTGCCG  
GGGAGCAGCCTCTGCAGCCCGTTCTGAACGCCGTCGCGGCCGGGACCCCGGCGCCGAGCCACAGCCACC  
GGCTGAATCGCCGGCCTGCGGAGACTGCGTCACCTCCCCAGGAGCCGCAGAGCCTGCGCGGGCGCCGGAC  
TCCTTGAGACCTCGGACTCGGATTCGGACTCGGACAGTGAAACAGATTCAGATAGTTCAAGTTCATCGT  
CTTCCTCTTCATCTTCCTCATCGTCGTCTTCTTCCTCTTGATATCACTTCCTCCAGTGCTGTCAGATGG  
AGATGATGATTTACAAATTGAGAAGGAAAATAAGAATTTTCTCTTAAACAAAAGATGAATTACTTCTT  
AATGAACTGCCTTCTGTTGAAGAACTCACTATTATTCTGCCTGAAGATATTGAGTTAAAGCCTCTTGGGA  
TGGTTTCAAGTATTATTGAACAACTAGTAATAATTGAATCTATGACTAACCTACCTCCAGTTAATGAGGA  
GACTGTAATTTTTAAAAGTGATCGACAAGCAGCAGGAAAGATATTCGAGATATTTGGACCTGTTGCACAT  
CCATTTTATGTGTTACGGTTTAATTCTTCAGATCACATTGAGAGTAAAGGTATTAATAAAGGAGACTA  
TGTATTTTGCTCCATCAATGAAAGATTTCACTCAATATATATTCACAGAAAACTAAAACAGGATAAGGG  
ATCAGATGCATCATGGAAGAATGATCAGGAACCACCACCAGAGGCCTTAGATTTTAGTGATGATGAAAAA  
GAGAAGGAAGCCAAACAGAGGAAAAAATCTCAGATTCAAGGCCGAAAAAACTCAAATCTGAATTTAATG  
AGCCTGGTGAAGATTTTACTGAAGTACATCAGAATTGGAATGCTCATAGCTCTGCTTCAGAGCATGCAAA  
AGGATATCGTAACAGAGAATTCACACGAGGATTTTCCAGGGCCAGATACCCTCGATCTTGCCATGGCAGG  
CCTCCACCTCAGCATTTCTATAACTCAGAACATATGGTATCTCAGGAGACTTCAGGATTTCTTCTCAGA

GACAAAATAATCCCATTATGCCACAATACCCCTTCTCTCCAGTGTTTGACATGCATAATTTTCCCCT  
CCGCCCTCCACCCCCACCACCACCCACCTGTAAACATGGGTTGGGCTACACCAAACATGGCTGCTCAT  
CCATTACTTAACCTACCATACTCCCTACCCCAACCCCTCCCCCTCCACCACTGCCTCCTCCACCCTCTT  
CTGGAGATAGTAATTCTCATTTTGGACCTTACTATTAGGTGACTATGCATTTCCAGAGAAATGTGGACTT  
TTCATATTATGTGGTAAGGATTTTTTTTTTCAAGAGTGATTATGGAGCTAGATTTTTAAAAACACTGTA  
AAATACTAAATGATTCCTTCTGTTGTAAGTTGATATATATTGTAACTTTGTGAAATTGTATTCATATG  
AAAATGTCAGCTCAAATCTTGGGAGAACATTAAATTATGTAATATTTAATTAAAA

>NM\_005746.3 Homo sapiens nicotinamide phosphoribosyltransferase (NAMPT), mRNA

AGTGACTTAAGCAACGGAGCGCGGTGAAGCTCATTTTTCTCTTCCTCGCAGCCGCGCCAGGGAGCTCGC  
GGCGCGCGGCCCTGTCTCCGGCCCCGAGATGAATCCTGCGGCAGAAGCCGAGTTCAACATCCTCCTGGC  
CACCGACTCCTACAAGGTTACTCACTATAAAACAATATCCACCCAACACAAGCAAAGTTTATTCCTACTTT  
GAATGCCGTGAAAAGAAGACAGAAAACCTCAAATTAAGGAAGGTGAAATATGAGGAAACAGTATTTTATG  
GGTTGCAGTACATTCTTAATAAGTACTTAAAAGGTAAAGTAGTAACCAAAGAGAAAAATCCAGGAAGCCAA  
AGATGTCTACAAAGAACATTTCCAAGATGATGTCTTTAATGAAAAGGGATGGAACCTACATTCTTGAGAAG  
TATGATGGGCATCTTCCAATAGAAATAAAAGCTGTTCCCTGAGGGCTTTGTCATTCCCAGAGGAAATGTTT  
TCTTCACGGTGGAAAACACAGATCCAGAGTGTTACTGGCTTACAAATTGGATTGAGACTATTCTTGTTCA  
GTCCTGGTATCCAATCACAGTGGCCACAAATCTAGAGAGCAGAAGAAAAATATTGGCCAAATATTTGTTA  
GAAACTTCTGGTAACTTAGATGGTCTGGAATACAAGTTACATGATTTTGGCTACAGAGGAGTCTCTCCC  
AAGAGACTGCTGGCATAGGAGCATCTGCTCACTTGGTTAACTTCAAAGGAACAGATACAGTAGCAGGACT  
TGCTCTAATTAATAAATATTATGGAACGAAAGATCCTGTTCCAGGCTATTCTGTTCCAGCAGCAGAACAC  
AGTACCATAACAGCTTGGGGGAAAGACCATGAAAAAGATGCTTTTGAACATATTGTAACACAGTTTTTCAT  
CAGTGCCTGTATCTGTGGTCAGCGATAGCTATGACATTTATAATGCGTGTGAGAAAATATGGGGTGAAGA

TCTAAGACATTTAATAGTATCAAGAAGTACACAGGCACCACTAATAATCAGACCTGATTCTGGAAACCCT  
CTTGACACTGTGTTAAAGGTTTTGGAGATTTTAGGTAAGAAGTTTCCTGTTACTGAGAACTCAAAGGGTT  
ACAAGTTGCTGCCACCTTATCTTAGAGTTATTCAAGGGGATGGAGTAGATATTAATACCTTACAAGAGAT  
TGTAGAAGGCATGAAACAAAAAATGTGGAGTATTGAAAATATTGCCTTCGGTTCTGGTGGAGGTTTGCTA  
CAGAAGTTGACAAGAGATCTCTGAATTGTTCTTCAAGTGTAGCTATGTTGTAATAATGGCCTTGGGA  
TTAACGTCTTCAAGGACCCAGTTGCTGATCCCAACAAAAGGTCCAAAAGGGCCGATTATCTTTACATAG  
GACGCCAGCAGGGAATTTTGTTACACTGGAGGAAGGAAAAGGAGACCTTGAGGAATATGGTCAGGATCTT  
CTCCATACTGTCTTCAAGAATGGCAAGGTGACAAAAGCTATTCATTTGATGAAATAAGAAAAAATGCAC  
AGCTGAATATTGAACTGGAAGCAGCACATCATTAGGCTTTATGACTGGGTGTGTGTTGTGTGTATGTAAT  
ACATAATGTTTATTGTACAGATGTGTGGGGTTTGTGTTTTATGATACATTACAGCCAAATTATTTGTTGG  
TTTATGGACATACTGCCCTTTCATTTTTTTCTTTTCCAGTGTTTAGGTGATCTCAAATTAGGAAATGCA  
TTTAACCATGTAAAAGATGAGTGCTAAAGTAAGCTTTTTAGGGCCCTTGCCAATAGGTAGTCATTCAAT  
CTGGTATTGATCTTTTCACAAATAACAGAACTGAGAACTTTTATATATACTGATGATCACATAAAACA  
GATTTGCATAAAATTACCATGATTGCTTTATGTTTATATTTAACTTGATTTTTGTACAAACAAGATTGT  
GTAAGATATATTTGAAGTTTCAGTGATTAAACAGTCTTTCCTCACTTTTCATGATTTTTATGAGCACAGAC  
TTTCAAGAAAATACTTGAAAATAAATTACATTGCCTTTTGTCCATTAATCAGCAAATAAAACATGGCCTT  
AACAAAGTTGTTTGTGTTATTGTACAATTTGAAAATTATGTCGGGACATACCCTATAGAATTACTAACCT  
TACTGCCCTTGTAGAATATGTATTAATCATTCTACATTAAAGAAAATAATGGTTCTTACTGGAATGTCT  
AGGCACTGTACAGTTATTATATATCTTGGTTGTTGTATTGTACCAGTGAAATGCCAAATTTGAAAGGCCT  
GTACTGCAATTTTATATGTCAGAGATTGCCTGTGGCTCTAATATGCACCTCAAGATTTTAAGGAGATAAT  
GTTTTAGAGAGAATTTCTGCTTCCACTATAGAATATATACATAAATGTAAAATACTTACAAAAGTGGA  
GTAGTGATTTTAAAGTAATTACACTTCTGAATTTATTTTCATATTCTATAGTTGGTATGACTTAAATG  
AATTACTGGAGTGGGTAGTGAGTGACTTAAATGTTTCAATTCTGTTATATTTTTATTAAGTTTTTAA  
AAATTAAATTGGATATTAAATTGTATGGACATCATTTATTAATTTTAACTGAATGCCCTCAATAAGTAA  
TACTGAAGCACATTCTTAAATGAAGATAAATTATCTCCAATGAAAAGCATGACATGTGTTTCAATAGAAG

AATCTTAAGTTGGCTAAATTCAAAGTGCTTGACATCAAAATGTTCTAGAGTGATTAGCTACTAGATTCTG  
AATCATACATCACATCTGACTAGAGACCAGTTTCTTTTGAATGATTCTTTTATGTATGTAGATCTGTTCT  
TCTGAGGCAGCGGTTGGCCAACTATAGCCCAAAGGCCAAATTTGGACTTCTTTTTATAAATGCAGATTGT  
CTATGGCTGCTTTCCCACTACTCCAGCCTAAGGTAAACAGCTGCAATAGAAGCCAAATGAGAATCGCAAA  
GCCCAAATGTTTATTAACCTGCCCTTTACACAAAATTACACAAAAGTTTCCTGATCTCTGTTCTAAGA  
AAAGGAGTGTGCCTTGCAATTTAAAGGAAATGTTGGTTTCTAGGGAAGGGAGGAGGCTAAATAATTGATA  
CGGAATTTTCTCTTTTGTCTTCTTTTTCTCACTTAAGAATCCGATACTGGAAGACTGATTAGAAAAAG  
TTTTTAACATGACATTAAATGTGAAATTTTAAAAATTGAAAAGCCATAAATCATCTGTTTTAAATAGTTA  
CATGAGAAAATGATCACTAGAATAACCTAATTAGAAGTGTTATCTTCATTAAATGTTTTTTGTAAGTGGT  
ATTAGAAAAGAAATATGTTTTTCAGATGGTTCTTTAAACATGTAGTGAGAACAAATAAGCATTATTCACTTTT  
AGTAAGTCTTCTGTAATCCATGATATAAAATAATTTTAAATGATTTTTTAATGTATTTGAGTAAAGATG  
AGTAGTATTAAGAAAAACACACATTTCTTCACAAAATGTGCTAAGGGGCGTGTAAGAATCAAAAGAAAC  
TATTACCAATAATAGTTTTGATAATCACCCATAATTTTGTGTTTAAACATTGAAATTATAGTACAGACAG  
TATTCTCTGTGTTCTGTGAATTTCAGCAGCTTCAGAATAGAGTTTAATTTAGAAATTTGCAGTGAAAAAA  
GCTATCTCTTTGTTTACAACCATAAATCAGGAGATGGAGATTAATTCTATTGGCTCTTAGTCACTTGGA  
CTGATTAATTCTGACTTTCTGTCTACTAAGCACTTGGTATTTGGCCATCTCCATTCTGAGCACCAAACGGT  
TAACACGAATGTCCACTAGAACTCTGCTGTGTGTGCACCCTTAAATCAGTCTAAATCTTCAGACAAAAGC  
AAATGGCATTATGGATTTAAGTCATTAGATTTTCAACTGACATTAATTAATCCCTCTTGATTGATTATA  
TCATCAAGTATTTATATCTTAAATAGGAGGTAGGATTTCTGTGTTAAGACTCTTATTTGTACCCTATAAT  
TAAAGTAAATGTTTTTTATGAGTATCCCTTGTTTTCCCTTCTTAAATTGTTATCAAACAATTTTTATAA  
TGAAATCTATCTTGAAAAATTAGAAAGAAAAATGGCAAGGTATTTATTGTTCTGTTTGCCATAATTTAGA  
ACTCACACTTAAGTATTTTGTAGTTTTACATTCCTTTTTAACCATTCAAGTGGAGAATGTCAGCTTTTCT  
CCCAAGTTGTATGTTAAGTCTATTCTAATATGTACTCAACATCAAGTTATAAACATGTAATAAACATGGA  
AATAAAGTTTAGCTCTATTA

>NM\_005899.5 Homo sapiens NBR1 autophagy cargo receptor (NBR1), transcript variant 1, mRNA

AGATTACCCACAGGGATAGCGGCAGAGCCGGTAGCGGACGGTCCTTGCAATTGGCCTCCGGCAGGCGCC  
CCCCGGGGGCGGGAAGCTGCCTCACAGCATGGAACCACAGGTTACTCTAAATGTGACTTTTAAAAATGAA  
ATTCAAAGCTTTCTGGTTTCTGATCCAGAAAATACAACCTGGGCTGATATCGAAGCTATGGTAAAAGTTT  
CATTTGATCTGAATACTATTCAAATAAAATACCTGGATGAGGAAAATGAAGAGGTATCCATCAACAGTCA  
AGGAGAATATGAAGAAGCGCTTAAGATGGCAGTTAAACAGGGAAACCAACTGCAGATGCAAGTCCACGAA  
GGGCACCATGTCGTTGATGAAGCCCCACCCCAGTTGTAGGAGCAAAACGACTAGCTGCCAGGGCAGGGA  
AGAAGCCACTTGACATTACTCTTCACTGGTGAGAGTCTTGGGATCAGACATGAAGACCCAGAGGATCC  
TGCAGTGCAGTCGTTTCCACTTGTTCCATGTGACACAGACCAGCCTCAAGACAAGCCCCAGACTGGTTC  
ACAAGCTACCTGGAGACGTTTCAGAGAACAAGTGGTTAACGAAACGGTTGAGAAGCTTGAACAGAAATTAC  
ATGAAAAGCTTGTCTCCAGAACCCATCCTTGGGTTCTTGTCCCTCAGAAGTCTCAATGCCTACTTCAGA  
AGAAACATTGTTTTTGCCAGAAAACCAGTTCAGCTGGCATATTGCTTGCAACAACTGCCAAAGAAGGATT  
GTTGGTGTCCGCTACCAGTGTAGCCTATGCCATCCTACAATATCTGTGAAGATTGTGAAGCAGGGCCAT  
ATGGCCATGACACTAACCACGTCCTGCTGAAGTTGCGGAGACCTGTTGTGGGCTCCTCTGAACCGTTCTG  
TCACTCAAAGTACTCTACTCCTCGTCTTCTGCTGCTCTGGAACAAGTCAGGCTCCAGAAACAGGTTGAT  
AAGAACTTTCTTAAAGCAGAAAAGCAAAGGTTGCGAGCTGAGAAGAAACAACGTAAAGCAGAGGTCAAGG  
AACTTAAAAAGCAGCTTAACTCCATAGGAAAATTCACCTGTGGAATTCAATCCATGGACTCCAGAGCCC  
CAAGTCTCCTTTAGGCCGACCTGAGAGCTTGCTCCAGTCTAATACCCTGATGCTCCCTTTGCAGCCCTGT  
ACCTCCGTTATGCCAATGCTCAGTGCAGCATTGTGGATGAGAATTTGCCTGATGGGACTCACCTTCAGC  
CAGGAACCAAGTTTATCAAACACTGGAGGATGAAAAATACAGGAAATGTAAAGTGGAGTGCAGACACAAA  
GCTCAAGTTCATGTGGGGAAACCTGACTTTGGCTTCACAGAAAAGAAGGATGTTTTGGTTCCTGCCTC  
AAGGCCGGCCATGTGGGAGTTGTATCTGTGGAGTTCATTGCCCCAGCCTTGGAGGGAACGTATACTTCCC  
ATTGGCGTCTTTCTACAAAGGCCAGCAATTTGGGCCTCGGGTCTGGTGCAGTATCATAGTAGATCCTTT  
CCCCTCCGAAGAGAGCCCTGATAACATTGAAAAGGGCATGATCAGCTCAAGCAAACTGATGATCTCACC

TGCCAGCAAGAGGAACTTTTCTTCTGGCTAAAGAAGAAAGACAGCTTGGTGAAGTGACTGAGCAGACAG  
AAGGGACAGCAGCCTGCATCCACAGAAGGCCAAAAATGTTGCCAGTGAGAGGGAGCTCTACATCCCATC  
TGTGGATCTTCTGACTGCCCAGGACCTGCTGTCCTTTGAGCTGTTGGATATAAACATTGTTCAAGAGTTG  
GAGAGAGTGCCCCACAACACCCCTGTGGATGTGACTCCCTGCATGTCTCCTCTGCCACATGACAGTCCTT  
TAATAGAGAAGCCAGGCTTGGGGCAGATAGAGGAAGAGAATGAAGGGGCAGGATTTAAAGCACTTCCTGA  
TTCTATGGTGTGAGTAAAGAGGAAGGCTGAGAACATTGCTTCTGTGGAGGAAGCAGAAGAAGACCTGAGT  
GGGACCCAGTTTGTGTGTGAGACAGTAATCCGATCCCTTACCTTGGATGCTGCCCCAGACCACAACCTC  
CTTGACAGACAGAAGTCCTTGACAGATGACATTTGCCTTGCTGAAGGACCACTTGGAATGAGAAGGAGGA  
GATTATCCATATCGCTGAGGAAGAAGCTGTCATGGAGGAGGAGGAGGATGAGGAGGATGAGGAGGAGGAG  
GATGAGCTCAAAGATGAAGTTCAAAGTCAGTCCTCTGCTTCCTCAGAGGATTACATCATCATCTGCCTG  
AGTGCTTTGATACCAGCCGCCCTGGGGGATTCTATGTACAGCTCTGCGCTCTCACAGCCAGGCCTGGA  
GCGAGGTGCTGAAGGCAAGCCTGGGGTTGAGGCTGGGCAGGAACCAGCTGAGGCTGGGGAAAGACTCCCT  
GGAGGGGAGAACAGCCACAGGAGCACAGCATAAGTGACATCCTCACGACCTCACAGACTCTGGAAACAG  
TGCCCCTAATCCCAGAGGTAGTGGAGCTTCCACCGTCACTGCCCAGGAGCTCTCCTTGTGTACATCATCA  
TGTTCCCCAGGAGTGGATTTACCAGTTACCATACCAGAAGTTTCTTCAGTCCCTGATCAGATCAGAGGA  
GAGCCCAGAGGCTCATCAGGACTTGTAACAGCAGACAGAAGAGCTATGACCACTCAAGGCACCATCATG  
GGAGCAGCATTGCTGGAGGACTGGTGAAGGGGGCTTTGTCTGTTGCTGCCTCTGCATACAAGGCCCTGTT  
TGCTGGGCCACCAGTCACTGCACAGCCAATAATTTCTGAAGATCAGACAGCAGCCCTGATGGCCCATCTC  
TTTGAAATGGGATTCTGTGACAGGCAGCTGAACCTACGGCTGCTGAAGAAACACAATTACAATATCCTGC  
AGGTTGTGACAGAACTTCTTCAGTTAAACAACAACGACTGGTACAGCCAACGCTATTGAGGAGTGACCTT  
GTATTAAATAACTGCCTGCTGCTCAGAGATGATCTTTATTCTGTCATTGGGGTATGGGATAGAAGCCCTT  
GCTTATTTTAACTCTGATGAATCTGTATAGAGCCCATCGTTGAGTTACCAAGACAATACCTGCTACAGTA  
TTTTGGGGAGCAAATAAGACCAGAACTTAAATTTTCACTTTAGACATTGGATGAATAGTATGAAGACA  
GTTTTTCAGTTGATTTGGATAAACTATTTTAGTGCATTGACAAGTGTAACCTCACTTCATATAGAACC  
ATTTTTCTTTCTGCTTTTATTGAACTGAGTATTTTTCTTTGGCTAATGTGGATTTTTTATGGGGATATC

TGTTAATTTTCAGGTTTTGAAAGACATTAACCTCGGAAGTTGTTTTTAAGAATTATTCTCATAATTCTTA  
TTCTCATAATTTCTGTAATCCACCTCAAGCTTCATAGTTATTTGGCATTGAAATAACACCCAGAGCATGA  
TAGAAATGTTGTTACTCTTCTCTCTCAAGGAGAAAGTAATTTTCCTGCAATACTTAATAATTGGCACCG  
TTGCTTTCTAAAGACTCCATGGTGCATTCAAGAGTATCCAACCTCAAGGGAATCTCCGCATTTCAATGAA  
AGGAGGAAGAGTGTGCTGATAAACCTACCAGCACCTATTGAGCAATGTCTATTATAGTAATTTTGCATAC  
ATTTTTATTTAAGGGAAAAAATATAGGTATTGTGAAATATTTTGCTAATCTTATAGAAAAGGAAAAAATC  
CCGTTATTTAAAGGGAAAAGTAAATTTAACAGTTGCCTTTTTCTTAATGTCAGGGCAGATCTTATTTTA  
CAGTACAGTGGGGGAAATAGAAACATGTGAAAGGCAAAAGGCAGGCTCCTAAATTAATGTCAGTGAAGTT  
CAGGGTGGGCAAATGAGTGTGTGTGAGGTATAGGAAATGCTGATGACTTCTTTAATGCTTGAAGTCCGTT  
CACAGGTATCTAGCCCTAGAATGCCTAGAACAGGAAGAGGCAGCTGGTGTCTGCAAACTTGGACAGGG  
GCAAAGTTGCTGAAAAAGTTTTGGTTTAACCCGAAGATAAGTGGAAGAGCTTGTCCATGAACCCAGGT  
TCTCACTCTGTTTACAGAAGTGTGTTGAGTACAGTTGGTGAAGGAAGAGGTAACAAAAAATGCTAAATAT  
TTTATCCATGAAAATGACTTCCAGAAAAGGAAGAATATGAACCCAGACCGAAGGGGAAAAGATAGTTAA  
TAGTATTATCTAACCTGGTTGGTATTTGTAATGAATGGTGATTTTAATTAGTCATTAGCCATAATGATGT  
TTATTTACAGTATAACTCCTGAATGCTACTTAAATAAACCAGGATTCAAACCTGCAAGCCAGCCAGGCCGT  
TCATTATTTAAACGTTTTAATCGGGGCTTCCGGGTAGAAGGTGGAGCGGCAGGGTGTAAATTGGGTGAT  
GGGTGGGACCTGTCTTGACCATCGGAGTTTTATAATCGAGGGCCAGGAGGGCCCGGGTGTCTCTCTGGT  
TATGTATGTACTTGTACATAACCACCTAAAGAATGGTGAAATAAATGTTCTTGGAATTCCTA

>NM\_205842.3 Homo sapiens NCK associated protein 1 (NCKAP1), transcript variant 2, mRNA

CTCAGCCGCCGAGACGCCGCCGCCGCCGCCGCCGCCACACCTAGTGGAGCAGCCGGGGAAGGCGGC  
TCGTTGGGGGCTGGGGCGGAGAGCGCCGGGGGTGGGGGCGGAAGGGCGGCGGGCGGAAGGCAGGAGGCTG  
CCGGGGCGCGGGCTGCTGCGGGAGAAGGGGCTCCGAGGAGTCCGCCGCGGCTCGCTCTGTGCGCGGCGCG

GGATTGGGGCGCGAGGGCCATGGGCGCGCTCTCCTAAGGCGGAGGTCGCGGGCGGGAGGGGAGGAGGCC  
GAGAGAGGCTGCTGCGAAGGCCGCGGGCCCGTGACTGGGCGCGAGGCGGCCGCGGCGGGCGGCGGCACCA  
GCACCACCATGTCGCGCTCAGTGCTGCAGCCCAGTCAGCAGAAGCTGGCGGAGAAGCTCACCATCCTCAA  
CGACCGGGGCGTCGGCATGCTCACCCGCTCTACAACATCAAGAAGCAAGGACAAGTTTGAAGGCATGT  
GGAGACCCCAAGGCAAAACCATCCTATCTTATCGACAAAAACCTGGAATCTGCTGTGAAATTCATAGTCA  
GAAAATTCCCTGCTGTAGAAACCCGCAACAACAATCAACAGCTTGCACAACACTACAGAAAGAAAAATCAGA  
GATTCTGAAAAATCTGGCATTATATTACTTCACATTTGTAGATGTTATGGAATTTAAGGACCATGTTTGT  
GAATTGCTGAATACTATTGACGTTTGCCAAGTCTTCTTTGATATTACTGTAACTTTGATTTAACAAAGA  
ACTACTTAGATTTAATTATAACCTATACAACACTAATGATACTGCTGTCTCGAATTGAAGAAAGGAAGGC  
AATCATTGGATTATACAACATATGCCCATGAAATGACTCATGGAGCAAGTGACAGAGAATACCCACGCCTT  
GGCCAGATGATTGTGGATTATGAAAACCTTTAAAGAAGATGATGGAAGAATTTGTACCCCATAGCAAGT  
CTCTTTCAGATGCACTAATTTCTCTTCAAATGGTATATCCTCGAAGGAATCTTTCAGCTGACCAGTGGAG  
AAATGCCCAGTTATTGAGCCTCATCAGTGACCTAGTACAATGCTTAATCCAGCACAGTCCGACACTATG  
CCTTGTGAATACCTCTCTTTGGATGCAATGGAAAAGTGGATTATCTTTGGCTTTATTTTGTGCCATGGGA  
TCCTAAATACTGACGCTACAGCACTGAACCTTTGGAACTAGCTCTTCAAAGTAGCTCTTGCTCTCTCT  
CTTTCGGGATGAAGTTTTCCACATTCACAAAGCTGCAGAAGACTTATTTGTAAACATACGAGGCTATAAT  
AAACGTATTAATGACATAAGAGAATGCAAGGAGGCAGCCGTGTCACATGCTGGTTCAATGCACAGAGAAA  
GACGCAAGTTTTTAAGATCTGCACTGAAGGAATTGGCTACTGTCCTCTCTGATCAACCTGGATTGCTAGG  
TCCAAGGCACTTTTTGTTTTATGGCATTATCCTTTGCCGTGATGAAATCATCTGGCTACTTCGTCAT  
GCAGATAACATGCCAAAGAAGAGTGACAGACGACTTTATAGATAAGCACATTGCTGAATTAATATTTTACA  
TGGAAGAACTTAGAGCACATGTGAGGAAATACGGACCTGTAATGCAGAGGTATTACGTGCAGTACCTTTC  
TGGCTTTGATGCTGTTGTCCTCAATGAACTCGTGCAGAATCTTCTGTTTGCCTGAAGATGAATCAATC  
ATCATGTCCTCTTTTGTAACTATGACTTCCCTAAGTGTAACAAGTTGAAGATGGGGAAGTATTTG  
ATTCAGAGGAATGAGATTAGATTGGTTTAGGTTACAGGCATATACTAGTGTCTCAAAGGCTTCACTTGG  
CCTTGCAGATCACAGAGAACTTGGAAAGATGATGAATACAATAATTTTTCATACAAAAATGGTAGATTCC

TTGGTGGAATGTTGGTGGAACATCAGATCTCTCCATATTTGTTTTATAGTCGTGCTTTTGAGAAGA  
TGTTTCAACAGTGTTTGGAGTTACCCTCTCAATCAAGATACTCAATTGCATTTCCACTACTTTGCACTCA  
TTTTATGAGTTGCACGCATGAACTATGTCCAGAAGAGCGACATCATATTGGAGATCGCAGTCTTTCCTTA  
TGTAATATGTTCTAGATGAAATGGCCAAACAAGCTCGAAATCTCATCACTGATATTTGCACAGAACAGT  
GTACCCTTAGTGACCAGTTGCTACCCAAGCATTGTGCCAAAACATCAGTCAAGCAGTGAATAAGAAATC  
AAAAAAGCAGACTGGTAAGAAAGGGGAACCTGAAAGGGAGAAACCAGGTGTTGAGAGCATGAGGAAAAAC  
AGGCTGGTTGTGACCAACCTTGATAAATTGCACACTGCACTTTCTGAGTTATGCTTCTCTATAAATTATG  
TACCAAACATGGTGGTATGGGAACATACCTTTACCCACGAGAATATTTGACTTCTCATCTGGAAATACG  
CTTTACCAAGTCAATTGTTGGGATGACTATGTATAATCAAGCCACACAGGAAATTGCAAAACCTTCAGAA  
CTTCTAACAAGTGTAAGAGCATAACATGACCGTACTCCAGTCAATAGAAAACATGTGCAGATTGATATTA  
CAAGAGTATTTAATAATGTGCTTCTTCAACAAACACAACATTTAGACAGTCATGGAGAGCCAACCATTAC  
AAGTCTATACACAAATTGGTATTTGGAACTTTGTTACGACAAGTCAGCAATGGCCATATAGCATATTTT  
CCTGCAATGAAAGCGTTTGTGAACTTACCTACAGAAAATGAATTAACATTCAATGCAGAGGAATATTCTG  
ACATATCAGAAATGAGGTCATTATCAGAACTACTAGGCCCATATGGTATGAAGTTTCTAAGTGAAAGCCT  
TATGTGGCATATTTTCATCACAAGTTGCTGAACTTAAGAACTTGTGGTGGAGAATGTTGATGTGTTAACA  
CAAATGAGGACCAGCTTTGACAAACCAGACCAGATGGCTGCACTGTTTAAAAGATTATCATCTGTTGACA  
GTGTCTTGAAGAGGATGACAATAATTGGTGTAAATTTATCCTTCCGATCATTGGCACAAGAAGCACTTAG  
AGATGTCTTATCCTACCACATTCCTTTCTTGTAAGTTCAATTGAAGATTTTAAGGATCACATTCCAAGG  
GAAACTGATATGAAGGTTGCAATGAATGTGTATGAGTTATCATCAGCTGCCGGATTACCTTGTGAGATTG  
ATCCTGCATTGGTCGTAGCTCTTCTTCACAAAAATCGGAAAACATTAGTCCAGAAGAAGAGTATAAAAT  
TGCCTGCCTTCTCATGGTGTGTTGTGGCAGTTTCTTGGCCAAACTGGCCAGTAATGTGATGTCTCAGTAC  
AGCCCTGCTATAGAAGGGCATTGCAACAACATACATTGCTTGGCCAAAGCCATCAACCAGATTGCTGCAG  
CTTTGTTTACAATTCACAAAGGAAGCATTGAAGACCGTCTTAAAGAATTTCTGGCGCTTGCATCCTCCAG  
TCTACTGAAAATTGGCCAGGAGACAGATAAACTACAACAAGAAATAGAGAATCTGTTTATTTACTGCTA  
GATATGATTGTACAAGAATCTCCATTCCTTACAATGGATCTTTTGAATCTTGTTCCTTATGTCTTGC

TGAGAAATGCATACCATGCTGTCTACAAACAAAGTGTTACATCTTCTGCATAAAATTACCTACTTAATCA  
AGATAAGCACGCATTTTTGTTGCCTTGGTTTTACCTGTAGACTGTGGAACATTTTTACCTTAAGACCTGA  
AAAAGTTTTGTGGATTATAAATTTCTTTCATACGGTTGTATTTCTGATCATTGGTTTCTTAATATGGTT  
GTACTACAGTATACTTGGTTGATTTAGGTTGCACATTCCTGAATTCCTGAGATTATTCCTATAATTTT  
AAAGTATCATTTATTTGAAAAACATACATTATCAACATGTTTTTGATATTTGATAATGAAAAAATCTTT  
GCTTGTTTATTTCTGAAAAAGAACTGTATTTAGTGATTATTTAGATAGTGATATTATAGTATTCATCTG  
TGTGTAAATTATTTATATAGGGAAGAGTTCTGATCTGTACCTATGGTTCTTATTGAAAACAACATTGGA  
TGTGCATTTCTGTGATGTTATGAATACATTTCTACTTTATTTTGAAACATTTGCCAACTAAATACTGTA  
ACACTGTATAACATTTAAAAATGTTAAAGAACTGCTTAGTATTAGAAGCAGATCATTTCCCAAATTCTA  
AGAGCAGCAGCATATGTTGTTGCTTGATAAAGCCTAGCGATAATTTTTAGACTAACTTCCATGGTGCCC  
TGTTGGCATTAGCACTACCATTGTACCCTGCTGTATAATAAACAATCTTAGACATTTATCAACTGTTGAT  
ACAAATGTTAGTCCCTAACCCTTTTTATATATGTTTTAAATTTTTGAAATTCAAGTGACCTGCCATAA  
CATAAAATAAACACTAGACTGTATCACACTTCGATTGATTTCTTTAAGATCCTTGGATATTCGTTCAATA  
ATAATAAAGTTTTTGTTAACTTAGTTTGAAATATAAAAAATAATGGTTTAGGAATGTCTAAGTACAGC  
ATTCGATACCAGGTCAGCTATTATATGATTTGTTTAAATGTTTTAAAAACATTTTATTGAAAAAATAC  
CAAAATTAGAAAATAAAATTACACAATACTTCTTAAAAATTAAGAACTTAAAGAAAACCTGTATGCTGTC  
AACTTGCTCATTTTATCTGTAACCAATAGAGTTATTTAAAAGAATAGGGAAAAAAAATTGAGTGATCAT  
GGGACTAGTGAGAATGTTGAGAACTGCTGCATTAGTCAGTAATGAATGGGAAAGACATAAAAGGGCCTAT  
TGCTTAATAGTTGGCATGGAGGGCAAAGCAGCTCATTTAGTTTGAAAATAACCAATGTTTTGCTCTTT  
GATTGGCATTGTTGAGGCTGTTTCTCAGCAGCTTGTATATGAATATCATAAAGAGCTTCTGTTACAGC  
TTCTTATGTATACACTGGTAACTTGTGTTAAGATAAAAGAAGGCTGCTGTGAACTCAGTTATAATGTTTT  
TCTTTCTTCAAACATAGAGAGTAGAATGAAATTGAAGTACTATGAGATTATGCTATTATTTGTGTATGA  
TTTGTCCAGCCTATATTTAAAGTAGGGAGTAGTTGTCACTATCTGTGAAAAATTGTACTTGTTCCATAA  
AGATTTTTTAAAAAGGGAAATTTTAAATGGCATAGTTCAGACCTGAAATAGTCTGATTTACACAGTGAG  
CAGTCAAACTAAGATTTAATGCCGTTTGTTTTGAAATATTAGGATCTTAGAGAGGTAATAACTTTGTTG

GCAGTGATCTCTGGAGAGGTAAAGTAGGAATTTGGATATGTACACTTTGGAATCATATGTGAAAGGGCAT  
AAGGATGAAAATAAGGCATTCTCTACCACTGCTAGGCTGAGAAAAAATCGCTCCTCATAGTCACCTGAA  
GTTTTGTCCAAATTTTTCTCATACAGCAAAGGCGGGGAGGAGGCGTGGCAAAGGTAACCTGGAGGAA  
AAAGTTAAAAGTAAATTGACAACTACTATTTTAATATCTTGTTTGTTTTATTTCTTCTAACTTACAC  
AACACATACTATTTTTGTTGTTTTCTCTACATTAATGTGATCATACCATACATACTGGCCTGTAATCTG  
CTTATTTCACTCAGTAGTAGAAAAAATGTCTTTAATATTCTTTTAATACCTTTATAGATACCATAACTA  
ATTTAACAAATTCATGGCCAGGCGTAGTGGCACACGCCTATTTCAGCACTTTGGGAGGCCAAGGCGGATG  
GATCACTTGAGGTCAGGAGTTCAACACCAGCCTGGCCAACATGGCAAAACCCTGACACTACTAAAAATAC  
AAAAATTACCCAGGTATGATGGTGCACACCTATCATCCTGGCTACATGGGAGGCTGAGGTGGAAGAATTG  
TTTGAACCCGGAAGGAGGAGGTTGCTGTGAGCTGAGATCACACCACTGCACTCCAGCCTGGATGACAGAA  
TGAGACTGTCTCAAAAAAAAAAAGAAAATACTCATTTGGATAGATTGGATAGATTTTATAGACAATTTCTT  
TTCATTATTATAAATGTATATCTATATCTTGGTAAAGTTGACCTGTTATTTTTTTAGAAATAATTTTCAG  
AAGTAAAATTGCTTCCTTTCTGCTGCTTTTTCATTCATTATTTAAGCAAGTATTTTAGATGCCTGCAT  
GTAATGGTGAGCAAAAAGGTGACCCTTTTATAGTTGAGCTTGGATTTTAGTGATGGTATACAATAAACAA  
ACCAGCTTCTTGAGACGGAGTTTCACTCTTGTTGCCAGGAAATGGGCAATGGCCTGATCTCGGCTCACT  
GTAACCTCCGCCTCCCGGGTTCAAGCAATTCTCCCATCTCAGCCTCCTGAGTAGCTGAGATTACAGGCGC  
CCGCCACTACGCCAGTTAATTTTTGGTATTTTATAGTAGAGATGGGGTTTTACCATGTTGGCCAGGCTGG  
TCTCGAACTCCTGACCTCAGGTGATCCACCCACCTCAGCCTCCCAAAGTGCTGGGATTACAGGCATGAGC  
CACCACGCCAGCCATGAGCAAACCTTCTGATGGTGACTGGAAAGTATACAGGATAATGTGGGGAGGCAGT  
GGTGAAACTACTTTAGAAGAAAGTGTTAGAAGAAAGTGTCATCTGTGTAAGAGAAAACATTTGAGCTGGT  
ACGTGAAGGATTAGAAGGAACCACAAGTGGGCTGAGGGGAGGAATAATAAAGGCAAAGACCCAGAAGGCA  
AGCACAAACTTGGCATGTTTGAGAAGTTAGAAGTGTCATCTGTGTCTCTGTCATGAGGAGTGCTCAAG  
TTCCCTCTAGGAGCCTTATGGGCTATCTAGCTCTTTTTCTTCTGATCATGTGCTTGCTTGCTTTCTTC  
TTTGCTTATATAGCAGAGTTCACAAATTAATCTAATGTAGGCTGGTTAATAAAGGAAATGAACATGAAT  
TCACTGATAGGCTCTTGCAATTAATGTGAAAATGTAAAGTCTGTTGTACACCATCAGGCCTTCTAAATGAA

GCCCCAATTCTGTAAGGTAGTGAATTGTAACCTACTGATTAGTACATGATCCATGCCATTCTGTTATAA  
GGACTTGCCTTTCTGAGACTTCACCTGTATTATTCCTAAGACTTTTGTGAATAATCCTTAAAGTAGTGAC  
TCCTTACATCTTTCTTTCATTTCTTCTTTGTAGTCACTTGAAATGACAGCATGAACCATCATTTTCATTTG  
AAGGCCTGAGCCTGAATTTTCAAATAGACAAAATGCTCTCTTCTCCGAAGATTTGCCATGACCTCTGCC  
TTTGGGAAAAAATATTTGAGATTTTAAAATTTTATTCTGTAGTACAAAAATTATGTTTTTCGTTAATTG  
GTCCTGTGGAATTGGAAGGAAATTTAATATTTATTGACTCTACTTTGGTATTATTTTCAGAGTGAGAAGT  
AACTTTAAGTGTATTAATAATTTTCATTCATTTTGCATGAACCAAACCTTCCCTACACATCGCTGTCCTTG  
ACTGTCCAGAGTAAACATGTCTAACTCTGGAATGTTTCATTTCCAATAAAAGTATTGAGCCTGTCATTTT  
GGGCCTAAGTAAAATGGGATAAATTAGCAATCTGAAGTTAGGATCCTAGCCACAGAGGGCCATGTCTCAT  
TTCTGGTTTAAGTGCACCCCTCATCCCAGCCCTTACCTTCTTCTTCTCTTAAGGATTGAGACAATCCT  
CTTGGTGCTCTTGGTGCAGGTGCATCTTGGTCACCTCTTACATGAGGGCCACAAACTTGGTAAATGGGTG  
GCCTGGAGATGGGGTTGTACTAGGTATGTGACCTTGGTGATTGCCTTGTCTCAGTTGTAGTATATGGCTG  
AGTCACATTCATAGTACACTACATACATACTGACCAAATGCCAATGGCTAAGGCTTGAAATTATTTCA  
CCAAGACCTAACTGAAGATTACCATCATAAAATAAGCTTCTAGAATCCATGAATAAGTAGGAAATCATA  
TTTAAAATTTACTGTAATTTTATTAAAGCTCATTTTTTAAATTTAATGCAGTGCAGAGTCATTAATTTCT  
CAGCAGTATCAGGTGCTAAATTGCTCACTCATTAACTACTAATTTAAGATAGTTATTTTAAATTATAGA  
ACAGGAAGCAACTTACGAGGTTGCAACCAAATTATATTTATTTTTCTCCATTAGTAACTGACTAAAAGT  
GTTTTCTTCAACTCTGGGATTTGAAGATTTTGTGGTCAGTGGTGATATAATTTCACTGAAGCGTGCTCAC  
AGACTAAAACGTGCACTACTCAGTGATGCGTCTGAATGTTTTAGAGACAAACCTAAGATAATGTTGC  
CCTTGTTTACTTTTATTATTTCTGATTTTTTTTTTATGCATGTGTTTGCTGCATCACACAATTACTTAAG  
AAGTTGTCCCTAACCTTTGTGCTGTGGTCTGAATGTTTGTGTCCCCCTGGCCACAAAATTCATATGTTGA  
AATCTGATCATCAGTGTGACAGGATGTGGGGCCTTTGGGAGGTGATTAGGTCATGAGAGTGGAGCCTTCA  
TGAATGGGATTAATGCCCTCGTAAAAGGGGCCCCAGACAGCCGACTTGCCCCAACCAACACGTGAGGACA  
AAGCAAGAAGCCACTGTTTCATGAACCAGAAAGCAGACCCTCCACAAACACCAAAATATGCCAGCACACTGA  
TTGGCTTCCCAGCCTCCAGAACTATAAGCAAGAAGTTTTTTTATAGTAACAAATTTATTGTTACAGTTC

TTGCTTATAAACTTTATAAACCAGACTAAGGCATTTTCGTTATAGCAGCCCACACGGACTCATATTTTGGT  
TCTAGAAATGTGACACTGGAATGATGTGGCTCTCAAGATGACAGTGTTGCTTCTGAATGTCTATGTTTCAT  
GTCATCTTTAATTGCATGAACACCAGTTTTAGCATCTTCCCTTGAGTAGAAAGAGATTCTCTACAGCAAG  
TATTACGTAAGAAGTACTGGTGGCCAGGCACAGTGGTTCACGCCTGTAATCCCAACACTTTGAGAGGCGG  
AGCCAGAGGTATCATTTGAGCCTAGAAGTTCGAGAGCAGCCTGGGCAATATGTCTAAACCCCATCTCTAC  
AAAAAAAATACAAAAATGAAAAAGCCGGGTGTGATTGTGTACACCTGTAGTCCCAGCAACTTGAGAAGCT  
GAGGTGGCAGGATTGCTTGAGCCCAAGGGGAGGGTTGGCGGCAGTGGGTGGTTCGAGGCTGCAGTGAGCC  
ATGATTATACCAAGTGCCTCCAGCCTAGGTGACAGAGCAAGAGCCGGTCTCGATAATAATTAAGGCCAGA  
CGCGGTGGCTCACTCCTGTGATCCCAGCACTTTGGGAGGCCAAGGTGGATGGATCACCTGAGGTCAAGAG  
ATTGAGACCAACCTGGCCAACATGGTGAAACCCTGTCTCTACTAAAAATACAAAAATTAGCTGGGCTTTG  
TGGCTCGCGCCTGTAATCCCAGCTACTCAGGAGGCTGAGGCGGGAGAATCGCTTGAACCCAGGAGGCGGA  
GATTGCAGTGAGCCGAGATCATGCCACTGCACTCCAGCCTGGGCAACAGAACAAAGACTCTGTCTCAAAAA  
AAAAAAAATTATAATACATTAATAAAAAAAAAAAGCACTTGCATTCTGAAGGCATATTCACCTTGAAGTGA  
TAGCATTCAATGTATAAAACACATGAGTTTCACTCCAAGTTACATATAGAATGTTTATCTTTATTTGAGA  
GGAAATATCCAGTTAATAATCAGAATGTCATACTAATTAGGTATGACCATAACTTACGTTAGTCACATGG  
TCATTGATTGCATGCAGATTCTGGCTGCCAGAAAGCACATTGAAGTAGGTAGTCATTTAACCATTTAACT  
GTTAGATCTTGCAAAGGTTGAAGCTGAAGCTGAGGAGCAGGTAGTACACAACCTTTACAGGTTAATGCTGA  
ATGTCAGTTCATTCTGAATTCTTACCTTCAGCCAAAAGGTACAAGGGTCTTTGCAGTCTGAAGCAAGGCC  
CAGATGGCAGAACTTGTGATGGCTAGGAGGGGAAAATTTGACCTTAACTGGTAGTTGTGGTTTTATCAAG  
CCAAAAATGCTGACTAGATAATAATGAGAGCTAATGTTTATTGAAAGCCATTGTGTACCAGATACTCT  
GTTTTCTCTAATTCAAACCTCTAAATATTGCTCTTTTAGTCTTCACAGTAATCCTATATCATGATGACCC  
CCATTTATTGATATGGAACTGAAGCTCAGGAAAGACAAAGCAATTTTACAACTCACACTACAAGGAA  
GTAGCAGAGGCCAACATTTAAATCTGGCCCCAGAGTTGTGTTCTTCTCATTAACTGTGTCTCAGATCTC  
TCAAATGTGAGTGTGGACTTTTCTAACCAATAGCATTTTTTAATTAATGTTTTAAAAATTTGAATAGCTT  
TTAGGGTACAGTGGGTTTTTGTTTACATGGATGAATCATACATTGGTGAAGTCTGAGGTTTTAGTGTACC

TGTCACCCAGGTAGTATGCATTGTACCCAATGTGTAGTTTTTATCCCTAGACCCGTTCCCATCCTCCCA  
CTTCTGAGTCTCCAAAGTCCATGATATCACTCTGTATGCCTTGCATACACATAGCTTAGCTCCCACTTA  
CAAGTGAGAACATACGGTATTTGGTTTTCTGTTCTGAGTTACTTTGCTTAGAATAATGGCCTCTGGCTC  
CATCATAGTTGCTGCAAAAAGACATTGTTTCTTTTTTATGGCTGAACAGTATCCGTGGTGTGTATATA  
TACCACACTTTCTTTGTCCACTCATTGGTCAGTGGGCACTTAGGTTGGTTCATATCTTTGCAGTTATGA  
ATTGTGCTGCAATAAATATACACATGCAGATTTTTTTTGATATATTGACTTCCTTTGGGTAGATACCCAG  
TAGTAGGATTGCTGGATCAAATTCTATCCAGTAGCATTTGAACTGCTTACATTAACAATGAGGGACAA  
AAAAATAACAATGAGGGCTTACATTATGCTACTCTTGATACTAGACATTTTCATATCCATTACTTCATT  
TAAACTCCACAACCAAATTACTCAATAGGGATTGTTTTCTTATTTTTGTAAATGAATGTGGAAACCAGC  
TCATAAACTTTAAATTCCTTGCCCCAGTGCATAAAATTACTGAGTTTGAGTGGCAGTGCTGAGATTAA  
AACCTAAGGCTCTAGGATTTCCAGCCCATATTTTTCTACTGTATCATGTTCTTTCCCAAAGCACTAAAA  
AACATTCCTGGGTAAATGACTGTGGGCTTGGGGACACTATGCCCACTTCTGGCCTTCATGGGTCTAAG  
TTGCTTCTTTGCTTCTCACTTTTTCTCTCTGATCCTGCTCAGATTAATCTCTAGTAAATCAGATTTCTT  
TCCTAGGCTGTCTTATCCCACATATATAGTAGATAATATGTCACATATTTGTGAATGTTAAAAATATTTG  
TTTTAGTTTTAAATCTCAAGCTCACACAGTACTTACTCTCTATGTTAACAAAAATGGTTTTTACTATTTT  
CTGAAGGTAACGCAGCTGTTGAAGTGAGATCCTACACTGGAACATACAACACTTGGTCTAATATTAAAGT  
TCGTGCCAAGAGCTCTCTAAATGTGATTGATGGATTAATTCTGCCTTTATGAAAGATGAACTTATTTTCA  
AGATAATAGCTAATTCTTGAATGGGCAACCTATTATGTATCAATGATTGTAATGATGGAGCATTTTAGTC  
ATTTGTAGCTGGAAGAGCCTTAGAGATTATCTGGTTCAACCTATTCAAGAGTTAGGTAATTTAACCAAAT  
TAACATATGTGGCGATGTGCTCATATAGTGTTCCTTCCACTGTGCTGTGTTGCCGCATATATGCTGATCT  
TATGTTTATGCAGTAATAGTCTTCATAATGATAAACAGCTACTGGTTCCTGGTAGGATTTTGGACGTGGA  
TATGACTTGAAGTATGATGCCACAGCCTCAAACAAATCTGGGGTTTGAATCCCAGCTCTGTCACTTATGG  
ACAAATTACTTAACTTCTCCAAGTTTGTTCCTAAGTGTAGAATGTGGATAATATCTACTTTAAAGGGC  
TATTGTAAGCATTAATAAAGATCATGCGTATAAATTGATGAGATGGTGGGGAAGAAGAGGCTACCACAA  
AGTAGGCATTCAGTGTAATGGTGGTAGTTTCTCCAGTATTATTAGGCTATTTGGTTTCACTTATAAAAT

TGCCTTCAAAGAGTTTTTTCATGGCTTTTATGAGTATTATAATATCAGAACTTCCACTCATGCAAATGTA  
ACATTTGTGTGTTAGTCTATTCTATAGCTCTGATCGGAGTCTTTATCTTAAATGGGAAAGATTATTTTCC  
CTGTCATGTAACTTTAACAGAAAACGATGCTAAAATTAATTTTAAGACTGCTCTATACTATATGTATGTT  
ATACTATATTTTTATATACTATACACAAAAATGTATAAGATGTAAAGCTTGATTTTCAAATGTTATTGC  
AGTATCCAGAACAATTGCGACAATTGCTCTTGGAAGCTTCTGTGCTTTTCCACATGCTGTTCCCTGTCTC  
TGGAATGGAATGTTCTTATTCTGGCTGGCAAACCTCTGAACATAATGTAAACAGTAAGCTCAAACATC  
ACTTGCCCTTTCTTACCATGCCATCCTGTTTCTTCTAAACCTTATAAAATGCCTTTATTATAGTACATAT  
TGAATCATAATGTAATTATTATTTATCTCTGACTCCTTTGATTCTGGGACTGCCTTGAGGTACGGTCTA  
GGTTTATTTTCATCTTTCTGTCTGTTTAGTCAAATTTCTACCCTGTGTAACCTCAGAACTTACTTTAA  
GTTAGGAAAGGCCAGTGGCTGGACAGATGCTACAGACCTCCATTGGTACAGATGCCCTTAGCTTCATGTT  
GGGAACAAGTGGTTCTGTTTCTTTTGTTCCTGTGGAGAAGCATCAGAGATACAGGCAGCTGGGGATTTC  
TACACCTGTAATAGCAGCAGCTCAGTGATGACACAGAGACATGTTTTTTTTTTTTTTTTTTTTTGACAG  
AAGGCGAAGGGGAAGCAAGGTACTTCTTACATGGCAGAGGGAAAAGGAGAGTTGGAGTGGGGGAGGGGGA  
GAGGGAGGAGCAGGAGCAGGGAGACGGGGAGGGAGAGGAAACTGCCCCGAAGACATGGTTTCTAAGATTT  
CTCCCAATGAGACAAATCACTTGTCTGGGATGTCAGGGGGAGAAGATGCAGAATCTGAGCCCCTTGATA  
AATAGACAAAAGGTGAAAGCATTGGCAATAGATCAAAAAGGCATTCCACGTAGCAAAAAATTATTTTA  
AATCTGAAAATTTAAGTGAAATGCCAAGAGCAAAGAAGAGAGGCCATCAGAAAAATTTCAAAGTGACTAC  
TCAGGTCATTGTCCTGAAATAAATGATCATTTTATTCTGGTGACTCACCCTAGCTAGAGTCAGTACTTC  
ATAGAAAAGACAGGAGCTGTGAGACACTTAACTGTAATCTTACCCCTTTACAGAAATGCCTCCTATAGTC  
AAGCTGGTCTGATGATCTCATGTCATCATGCACAAGGATTAGCAAGCCTTGAAATTTTATCCTGTCAGTG  
TAACTCCTCATCTAGTCTCAAGATTGCACTGGCAGTTCTTTCGCAGCTGATCGTACAGGGAGGACCAATA  
AGGCTCATAGAACACCCTTGGAGAATGAATGCCTCTGCTGCTGGAGGTCACAGCACCCAGAAAGTGACTA  
GAGGGAGCAGCTGATACCTGCTCTAGTGAGTTGTGCTATTCTGTACATCCTTGACAGAGGTCCAAGGGT  
TGCTGGCAAGTGAAGGAATATCATGCCTGTAGTTTGAAGGATAGATCACTCAACTCTCAACTATTCTCTC  
TTCAGCTGTGAACCATACAACGTTTTTGAAAAGCAAAGTCTGAACATTTGCATTCTATACAGAATATTAC

AGTTGGAAAATAGGTGTGGTGTCTAGAGAAATGCTTCTAAATGCTGCAAGCCACCCTATGTGAAGCCTAG  
TCTAGAAATCTGCTTTGCTTCATTTATTAACCTCATTGTATCTTTGGAAGTAGAAGTTCTTAAAAGTGTG  
TACAGAAGATGAGTCCTCAGCATGAGTTTCACTGCCTGTCTGTGTGAGAGGAAGTGACCTTGAGAGCAGC  
TGTAGCCCTAGGGGGACACCCAGGTAGAGGTGCTCACAACATGCTCTGACACCCGGTATGGCTGCATTCC  
CAGCTTAAATGATCACATCTGCTCTTGGTTTTTCACTGTTTACAAAATCTGATTTCTTTAAAGGGAAGG  
GATGGAAAAGGTAGTCAATGCTCCTCTGAGCACCCAAAGCATCCCTCCACAAGAACAAAGAGGAAAAATC  
ATTACTTGCTCCCAACATTACACAAAGCGCATCTCTACCAATGGAACCTCTGCAGTGTGGTCTAGCCATC  
AGCCTTTCCACCTCACAGCATATTTTCTGTGGGGTAATTTATTAGAGGGGAATTTGTTCTTTTTACT  
CTTTTTACTCTTCAAATTAGTAATAGAACCCCTCATGTCATTCTAAGTGACTTAAGTTTTAAAGGGAACC  
AGAAAAGGAGAGAATATGCTATTGTGGCACTTCTAAAATGCAGAGTGTCTCAAAGATGGTTATAGTGGG  
TAATGGGTTTCATATAAATTGCATACTAGAGTATCTCCATTTCTCTTTTAATTTTTTAATTGGTTTTTT  
AAAGCTTGATATGCTGAGTTAGTTTTCATTTAAAAACAATGCTTGAGTAGGAAAGTTAAAGAAATAGAAA  
TTGCCTGTTTTAATCTATTCATCCTGGCAGCAGGTATGTATTGTATCTGTCCAGAGTCCAAAACGTCAGC  
TCCCTCCACTTGCCTTCCCCATTTACATAAACTATAAAAGTTAGAAATAATATATTATGTCATATCCTA  
ACATCAGTTCAATGAATATAGTTTTTAAAATACCTACTATGTGCTAGATACTGAGGACAGAATGATAAAA  
TACAAAACAAAGCTAACTAAAAACACAGTTTAACTAGTCTTGTCTACGATTACCTGCCCTAACTATAACT  
TCATTTAAGGGGAGATACTGCTAAAGGGAGTTCCTTCTGTGACTGCACACTCTGATACCAATATGTGACT  
TCTCCCTGGCTACAACCTGATTAAATGAGGGAAGAAAAGTATGATCCAAGGGGAGTTAGTCCAATAGCTTGTA  
AATGGTGGGTTCTTATCAGAGTTTTCTCACTAAGTTAGAACCAAGAGGCTGAGGGTTGTGGGGGCTACTT  
AAGCAGAAAGTTTCATGGAGTATGGACTGTGCACCATTGTGAAGTTTCCTGTATTTCCACAGGCTGTGGG  
GGCAGAGAGCATCAGAGTGCTGATCAGGAAAAAAGAATGAGGCAGATGCAGACAGAGAAGCAAAGAAGCA  
TGAGAGGATGAGAATTAGGAAGTAGACTCTTTTTTCATTTTAATTAATTTGACTAGATTATATTTCTTGC  
AATCAAAAGGGCCCTGTGCAGAGAAGGTCCTTATCTTCGTTCATTTTTTGTTGCTATAGCTGAATACCCG  
AGACTGGGTAATTTATAAAGTAAAGAAATTTATTGCTTACCATTTTAGATGCTGGGAAGTACAAGGTCAA  
GGGTTCTCATCTAGTGAGGGCCTTCTTGCTAGTGGGGTCTCTGTAGAGTCCTGAGGTAACACAGAGCATC

ACATGGTGTGGGGGTGGGATTCACCAGAGAGAGCCAACTGACTTTTATAACAGACTCACTTTTGTGGTA  
ACTAACCCACTCCCTTGATAGCCCATCAATCCATTAATCTAGAAATAAATTCATTCACTCATGAGGGCAG  
AGCTCTTGTGAACCAATCACCTCCCAGAAAGTCCCACCTCTCAACACTGCTGCACTGGGGACCAAATTTCC  
AACACATGAACTTTTCGGGGACACATTCAAGCCACAACAGTCCTCAATAAATATTTGTTGAATCAATAAA  
TACACAGGACATAGTGTCTAAATGCTTGGCATGTACATGAACCAGATTTGGTCCTTGATGTCACAGAGC  
TTATAATATAGTGGAGGAGACAGACTTTACATGTTTGATCTTGACTGTAAACTAGGGTCACTACTCATC  
ATCTGATGAAGGAGGCAGACAGTAAAACAAATAACAACACTATTCAACATGGTAACGTCAAACTGAACAGA  
GGCTCAAGTGAAAGTTTCAATGATAGTAACCATGGCCAATGGATAGGTGAATGCATTGGAAAATTAGTAT  
GATGCCATTAGCAAAAACATAAATTGCACTTAACTAAAGTTCATCTGGCTGAATTCTTTCCTTCCTTCCT  
TCCTTCCTTCCTTCCTTCCTTCCTTCCTTCCTCTATCTTTCCTTGGTTTTGAGATCTGTCTATAGTATTG  
TGCTAGTGCACATATTTAATTTGGTGCAAGGCATGCTTAACAGAGTAAGTGAAAAGCTATAAAGGTTAG  
AGCGTGTATTAGTTTCAATGACGAAGGAGTAATAAATCATTTTGTGAGTTGCACTCTAACATTCAAATT  
CCATTTTTATTATGGCTAACTAGCCAAGCATTTATAATTCTGAACTCCACAGAATGGGGAAAAAGTGTAT  
TAACTTATAATAGATCATTGAGCTTGTTAAATGTACCTTTCCTAATTCGTACTTTTTCCCTTTTGCTGAG  
AAAAATGCCTTTCTGAATATATAATTTTTACAGGTCATTGGAAAGGAGTACTGCACAACAGGATTATTAT  
AATGTGCTAAAAGATGGCACTTGTATCTCATTGCCACATAGAGAGCTCATGTGAAAACCTTTGATCTTT  
GCTGGCTTTTTAGCTGAAAAGATTTGGAAATCTTTTTGGCACTGGCAAAAACAGAACTGTGGTAACTGTT  
TATAGTTGGTTGATTTTTAGCAATGGGTAAAGAATGTCTTTGTTGAATCCAGTTTATTAATACGTAATGGG  
CAACATGTTGCCTTAAAGGCAAAAGCATATTTTTCTCATATCAAAAAGCTCCCTAAATTTTTGCCAATAT  
CCAAAGATATTTAAGATGGTCTTCATTTCTTTTCAGTCTGTCCTATGCTGAGAAAAAAAAAATTACAA  
CCTCTGAACTTCAGCAGTTTTTTAGGTAAAAGGAATTTTTCATGATGTGATTGATATAACTACTCAGCTG  
GACATAAGCTTCAAGGGCTAAGTCCATTTGCCGATTTGTTTGCAATTCCTACTCCAATAAAATAATTC  
AAAGACATGAAGTGTCTATTGTGGAAAATGCATGAATAATGCAAAAGTCATTCTCAAGTGACCTATCAGA  
AAGGCCTACCAGAAATGCAGTTACTGCTTCTAATAAAATCATGAAAACTTTTTTAAAAAGTATAACCA  
TCTTGAATTTGTTGAGGCAATTATAAGAGAGTATATAAGGGCAAGTTTCTCCAAAAGCGGTTCTGTTTGT

TTTGTTTTTTTTTAATAATTCCCATCAACAGCAATCTGTTTTCTCATTGTAGTAGTATAGGTGTTAACAT  
AAAAGCTCAAACAGCTTGGGAGAAAAAAAAGGATATAGCAAACCTAACTGATAACTTTGCTAGTTTCAAA  
TCATTATGATGGCCATTCATAGATGACTGAAATATTTAACATTTGAAGTAACAGAATTTTGACTTATGTT  
TTCATGGTTTAAGAGTTTATATTTCAAATTTTTTCACATAGTCTGTTTATAACAGTATATAAAACATGTA  
TAACTATATAAGTTAATAAAGTCATGAACTGATGGCCATTTTTTGGTCTTATTCATATAGTATAGGCTG  
TTTTGTGAATTAATCCCCTTCCCATGTGTTTGAATTCCCCTATGTAAGGCTTAGTGGTGTAGCATGA  
TCCAAGGGTGGGATTTTCAGCCCTCTGACATCAAAAGGTGAAGCAGAGGACACAAAAACCCTCACTGCAT  
CTCCCTAGACTGGCCAGAACCACTCCATGGTCAGTGGACTCCCTTAATAGGAAGGAATGCTGGTCAGTT  
GTCAAAGAGCAAAAAGGGAGGGGTAGTCATGAGGTTGGTTGTAATCAGAGGTGCAACAGGTCTTTCCAAA  
GGGCTGGTTTCTGTTTAACTCTTAGGAAAGAACACCTAATGGTAGTTAGTGAGGAGGGGGTATAATGAGA  
TGTGCCAACCTCCCATCCCATCATGGCCGGGAACTCAGTTTTTAAGGTTTCCCTGAAGTCCTCTTGCC  
AGGAGAGGGTCTGTTTAGTCAAATGTGGGGGGGGAGCTTAGGATTTTATTTTATTTCCAAGTTATAATG  
TTGGACCATCAGAGCATGAATACAGGTTGAGTCTTTAATCTGTAAATACTTAGCAATCACCTTCTTCTCA  
GTAACTTTCTCTGAAGGTTGCTGATAAGCCAGTGTTCTTGATGTTTGCCCACTTACCCCTCAAGATGAGG  
AGTGAAGAAATTAGATTGCATTGCCAGGAATTTCTAGAAAGAAAAGGTTTTGAGGATGCATGACCTATGA  
GGGTGCTGAGGACCCCTTTCCACCAAACATGGACTAACTTCTGGGTTGCTCTTTCACATCTATTGTCTTG  
TTCGACGTACACAGAAGTGCAGAGCACAGCCGCAGCCCTCACAGCATCATCTATCTAGGTTCTGAATCCT  
GAATGGTCTGAGGCTCTCCTAGAGCTGAGATTCTCCTTGCAGTTCAGTGGAGAAAAGCACTTTCTTTG  
CCGAGGCAGTGTAACCTCCTTGTCCCAAGGCTCCAAGTGTGTGGGCACATATGAGTATACATTAACAT  
CCATGCCCAATTTATAATCACTGTTTTCCCCACATGTGTACTCAGACCTCCAAGCTTCTGAAAAATATTT  
CCTCTCATCTCTCAAAGAATTTTAGTACATTTGCCTGGATGCAGAAACACAAATCATGCTGGCTTTCCTA  
CTCAATCAAAAACCTGTAGCTTGAGTGGGGTGGCAAGGGTGTCCACAGCAGGTTTACTTGGAATCCAAA  
ATGATGTAGAGTTTAGTGAGGCAGCTCCTTGAGTTTGAAGTTAGAGCCCTTTTGGCTACCAGGGCACCTG  
CAGTCTCCAAGATAGTAGAGTCTGAACCAGTTAAAGAGCCAGTACCACAGCTTTCAGAAACCACTGT  
TTCTCCTTAACTCTAGGGCTCAGCGGTTGAACTCCTTAGAATAAACTTTCTGTCTGCGACCCTATCATT

TTCTTTTGTATTTTGGCCTTCACTGAATTCCCACCCCATCCATTCCAACAGACTTGGTTATACGTGTCTG  
AACACCAAATGTGACAGAATTTGTGGCCTTGGATCAGGAGGCTATTTGGCCCTTATCTAAATCGGTGGCT  
GAGAATGGATTCCAGGGAAGTGTTTTCTTAGGAGTACCCAAGAAGCTCAGCTCAGGTTGGGCTCCCTGT  
TCTATTCTGAGAACTACAAATCAAATTCAAAATGGAGCACAGAAAATTCTCATTTCTAGTTGACTTATTT  
GTATTTTGGTGTCTGTGCCCTAAATATCTTCTCAAGGAAACCTTGGCTTTAAAAGTGATTGTTTACTTA  
AACAAATAAAACAACAACATACAAGAAAAGGCAGTAAATCCGAGCGTCCATCAACAAATGAATCAAAAAA  
CAAATGAGATATATATGTACGGTGGCATATTATTCAGCCTTAAAAAGGAAAGAAATTTGACACATGAGA  
CAATATGAATGAACCTTGAAGACATTAATTATGCTGAGTGAAATAAGCCAGCCACAAAAGAACAGATATT  
GTATAATTCCTCTTATATTAGGTACCTAAAATAGTCAAATTGATAGAAAGTAGAATGTTGGTTGGCAGGG  
GCTGGCAAGGAGAGGGGAAATGAAGAGAAGGTGTATGAAGGGAACAGAGTTTCAGTTGGGGAAGACGAAAA  
AGTTCTGACAGTGGATGATGGTGGTTGTTGCACAGCAACATGAATGTACTTAATGCCACAGAACTGTATG  
CTAAAAATGGTTGAAACGGTAAATTTGATATAATGTGTATTGAACCTATTTCCAGATCAAAACAGAGAG  
ATCTACATTCCTTTTGGTGGTGTCAAATAAACCATTAATCTTGAAATAGC

>NM\_006164.5 Homo sapiens NFE2 like bZIP transcription factor 2 (NFE2L2), transcript variant 1, mRNA

GATTACCGAGTGCCGGGGAGCCCGGAGGAGCCGCCGACGCAGCCGCCACCGCCGCCGCCGCCGCCACCAG  
AGCCGCCCTGTCCGCGCCGCGCCTCGGCAGCCGGAACAGGGCCGCCGTCGGGGAGCCCCAACACACGGTC  
CACAGCTCATCATGATGGACTTGGAGCTGCCGCCGCCGGGACTCCCGTCCCAGCAGGACATGGATTGAT  
TGACATACTTTGGAGGCAAGATATAGATCTTGGAGTAAGTCGAGAAGTATTTGACTTCAGTCAGCGACGG  
AAAGAGTATGAGCTGGAAAAACAGAAAAAAGTTGAAAAGGAAAGACAAGAACAACCTCCAAAAGGAGCAAG  
AGAAAGCCTTTTTGCTCAGTTACAACCTAGATGAAGAGACAGGTGAATTTCTCCCAATTCAGCCAGCCCA  
GCACATCCAGTCAGAAACCAAGTGGATCTGCCAACTACTCCAGGTTGCCACATTCCCAAATCAGATGCT  
TTGTACTTTGATGACTGCATGCAGCTTTTGGCGCAGACATTCCCGTTTGTAGATGACAATGAGGTTTCTT

CGGCTACGTTTCAGTCACTTGTTCTGATATTCCCGGTCACATCGAGAGCCCAGTCTTCATTGCTACTAA  
TCAGGCTCAGTCACCTGAAACTTCTGTTGCTCAGGTAGCCCCTGTTGATTTAGACGGTATGCAACAGGAC  
ATTGAGCAAGTTTGGGAGGAGCTATTATCCATTCTGAGTTACAGTGTCTTAATATTGAAAATGACAAGC  
TGGTTGAGACTACCATGGTTCCAAGTCCAGAAGCCAACTGACAGAAGTTGACAATTATCATTTTTACTC  
ATCTATACCCTCAATGGAAAAAGAAGTAGGTAAGTGTAGTCCACATTTTCTTAATGCTTTTGAGGATTCC  
TTCAGCAGCATCCTCTCCACAGAAGACCCCAACCAAGTTGACAGTGAAGTCACTAAATTCAGATGCCACAG  
TCAACACAGATTTTGGTGATGAATTTATTCTGCTTTCATAGCTGAGCCCAGTATCAGCAACAGCATGCC  
CTCACCTGCTACTTTAAGCCATTCACTCTCTGAACTTCTAAATGGGCCCATTTGATGTTTCTGATCTATCA  
CTTTGCAAAGCTTTCAACCAAAACCACCCTGAAAGCACAGCAGAATTCAATGATTCTGACTCCGGCATT  
CACTAAACACAAGTCCCAGTGTGGCATCACCAGAACACTCAGTGGAATCTTCCAGCTATGGAGACACACT  
ACTTGGCCTCAGTGATTCTGAAGTGGAAGAGCTAGATAGTGCCCCTGGAAGTGTCAAACAGAATGGTCCT  
AAAACACCAGTACATTCTTCTGGGGATATGGTACAACCCTTGTCACCATCTCAGGGGCAGAGCACTCACG  
TGCATGATGCCCAATGTGAGAACACACCAGAGAAAGAATTGCCTGTAAGTCCTGGTCATCGGAAAACCCC  
ATTCACAAAAGACAAACATTCAAGCCGCTTGGAGGCTCATCTCACAAGAGATGAACTTAGGGCAAAAGCT  
CTCCATATCCCATTCCCTGTAGAAAAAATCATTAACTCCCTGTTGTTGACTTCAACGAAATGATGTCCA  
AAGAGCAGTTCAATGAAGCTCAACTTGCATTAATTCGGGATATACGTAGGAGGGGTAAGAATAAAGTGGC  
TGCTCAGAATTGCAGAAAAAGAAAACTGGAAAAATATAGTAGAACTAGAGCAAGATTTAGATCATTTGAAA  
GATGAAAAAGAAAAATTGCTCAAAGAAAAAGGAGAAAATGACAAAAGCCTTCACCTACTGAAAAACAAC  
TCAGCACCTTATATCTCGAAGTTTTTCAGCATGCTACGTGATGAAGATGGAAAACCTTATTCTCCTAGTGA  
ATACTCCCTGCAGCAAACAAGAGATGGCAATGTTTTCTTGTTCCCAAAAGTAAGAAGCCAGATGTTAAG  
AAAACTAGATTTAGGAGGATTTGACCTTTTCTGAGCTAGTTTTTTTGTACTATTATACTAAAAGCTCCT  
ACTGTGATGTGAAATGCTCATACTTTATAAGTAATTCTATGCAAAATCATAGCCAAAAGTATAGAAA  
ATAATACGAAACTTTAAAAAGCATTGGAGTGTGAGTATGTTGAATCAGTAGTTTCACTTTAACTGTAAAC  
AATTTCTTAGGACACCATTTGGGCTAGTTTCTGTGTAAGTGAAATACTACAAAAGTATTTATACTGT  
TCTTATGTCATTTGTTATATTCATAGATTTATATGATGATATGACATCTGGCTAAAAAGAAATTATTGCA

AAACTAACCACTATGTACTTTTTTATAAATACTGTATGGACAAAAAATGGCATTTTTTATATTAAATTGT  
TTAGCTCTGGCAAAAAAAAAAATTTTAAGAGCTGGTACTAATAAAGGATTATTATGACTGTAAAA

>NM\_003998.4 Homo sapiens nuclear factor kappa B subunit 1 (NFKB1), transcript variant 1, mRNA  
GAAGTGCACCAGCGAGCCGGGGCAGGAAGAGGAGGTTTCGCCACCGGAGCGGCCCCGGCGACGCGCTGACA  
GCTTCCCCTGCCCTTCCCGTCGGTCGGGCCGCCAGCCGCCGAGCCCTCGGCCTGCACGCAGCCACCGGC  
CCCGCTCCCGGAGCCCAGCGCCGCCGAGGCCGAGCCGCCCGGCCAGTAAGGCGGCGCCGCCGCCCGGCC  
ACCGCGCGCCTGCGCTTCCCTCCGCCCGCGCTGCGGCCATGGCGCGGCGCTGACTGGCCTGGCCCCGCC  
CCGCCGCGCTCCCGCTCGCCCCGACCCGCACTCGGGCCCCGCCGGGCTCCGGCCTGCCGCCGCTCTTCC  
TTCTCCAGCCGGCAGGCCCCGCGCCGCTTAGGAGGGAGAGCCACCCGCGCCAGGAGGCCGAACGCGGACT  
CGCCACCCGGCTTCAGAATGGCAGAAGATGATCCATATTTGGGAAGGCCTGAACAAATGTTTCATTTGGA  
TCCTTCTTTGACTCATACAATATTTAATCCAGAAGTATTTCAACCACAGATGGCACTGCCAACAGCAGAT  
GGCCCATACCTTCAAATATTAGAGCAACCTAAACAGAGAGGATTTCTGTTCCGTTATGTATGTGAAGGCC  
CATCCCATGGTGGACTACCTGGTGCCTCTAGTGAAAAGAACAAGAAGTCTTACCCTCAGGTCAAATCTG  
CAACTATGTGGGACCAGCAAAGGTTATTGTTTCAGTTGGTCACAAATGGAAAAAATATCCACCTGCATGCC  
CACAGCCTGGTGGGAAAACACTGTGAGGATGGGATCTGCACTGTAAGTCTGGACCCAAGGACATGGTGG  
TCGGCTTCGCAAACCTGGGTATACTTCATGTGACAAAGAAAAAAGTATTTGAAACACTGGAAGCACGAAT  
GACAGAGGCGTGATAAGGGGCTATAATCCTGGACTCTTGGTGCACCCTGACCTTGCCTATTTGCAAGCA  
GAAGGTGGAGGGGACCGGCAGCTGGGAGATCGGGAAAAAGAGCTAATCCGCCAAGCAGCTCTGCAGCAGA  
CCAAGGAGATGGACCTCAGCGTGGTGCGGCTCATGTTTACAGCTTTTCTCCGGATAGCACTGGCAGCTT  
CACAAGGCGCCTGGAACCCGTGGTATCAGACGCCATCTATGACAGTAAAGCCCCCAATGCATCCAATTG  
AAAATTGTAAGAATGGACAGGACAGCTGGATGTGTGACTGGAGGGGAGGAAATTTATCTTCTTTGTGACA  
AAGTTCAGAAAGATGACATCCAGATTCGATTTTATGAAGAGGAAGAAAATGGTGGAGTCTGGGAAGGATT

TGGAGATTTTTCCCCACAGATGTTTCATAGACAATTTGCCATTGTCTTCAAACTCCAAAGTATAAAGAT  
ATTAATATTACAAAACCAGCCTCTGTGTTTGTCCAGCTTCGGAGGAAATCTGACTTGGAAGTCTAGTGAAC  
CAAAACCTTTCCTCTACTATCCTGAAATCAAAGATAAAGAAGAAGTGCAGAGGAAACGTCAGAAGCTCAT  
GCCCAATTTTTCGGATAGTTTCGGCGGTGGTAGTGGTGCTGGAGCTGGAGGCGGAGGCATGTTTGGTAGT  
GGCGGTGGAGGAGGGGGCACTGGAAGTACAGGTCCAGGGTATAGCTTCCCACTATGGATTCCTACTT  
ATGGTGGGATTACTTTCCATCCTGGAAGTCTAAATCTAATGCTGGGATGAAGCATGGAACCATGGACAC  
TGAATCTAAAAAGGACCCTGAAGGTTGTGACAAAAGTGATGACAAAACACTGTAAACCTCTTTGGGAAA  
GTTATTGAAACCACAGAGCAAGATCAGGAGCCCAGCGAGGCCACCGTTGGGAATGGTGAGGTCACTCTAA  
CGTATGCAACAGGAACAAAAGAAGAGAGTGCTGGAGTTCAGGATAACCTCTTTCTAGAGAAGGCTATGCA  
GCTTGCAAAGAGGCATGCCAATGCCCTTTTCGACTACGCGGTGACAGGAGACGTGAAGATGCTGCTGGCC  
GTCCAGCGCCATCTCACTGCTGTGCAGGATGAGAATGGGGACAGTGTCTTACACTTAGCAATCATCCACC  
TTCATTCTCAACTTGTGAGGGATCTACTAGAAGTCACATCTGGTTTGATTCTGATGACATTATCAACAT  
GAGAAATGATCTGTACCAGACGCCCTTGCACTTGGCAGTGATCACTAAGCAGGAAGATGTGGTGGAGGAT  
TTGCTGAGGGCTGGGGCCGACCTGAGCCTTCTGGACCGCTTGGGTAACTCTGTTTTGCACCTAGCTGCCA  
AAGAAGGACATGATAAAGTTCTCAGTATCTTACTCAAGCACAAAAGGCAGCACTACTTCTTGACCACCC  
CAACGGGGACGGTCTGAATGCCATTCATCTAGCCATGATGAGCAATAGCCTGCCATGTTTGCTGCTGCTG  
GTGGCCGCTGGGGCTGACGTCAATGCTCAGGAGCAGAAGTCCGGGCGCACAGCACTGCACCTGGCTGTGG  
AGCACGACAACATCTCATTGGCAGGCTGCCTGCTCCTGGAGGGTGATGCCCATGTGGACAGTACTACCTA  
CGATGGAACCACACCCTGCATATAGCAGCTGGGAGAGGGTCCACCAGGCTGGCAGCTCTTCTCAAAGCA  
GCAGGAGCAGATCCCCTGGTGGAGAACTTTGAGCCTCTCTATGACCTGGATGACTCTTGGGAAAATGCAG  
GAGAGGATGAAGGAGTTGTGCCTGGAACACGCCTCTAGATATGGCCACCAGCTGGCAGGTATTTGACAT  
ATTAAATGGGAAACCATATGAGCCAGAGTTTACATCTGATGATTTACTAGCACAAGGAGACATGAAACAG  
CTGGCTGAAGATGTGAAGCTGCAGCTGTATAAGTTACTAGAAATTCCTGATCCAGACAAAACTGGGCTA  
CTCTGGCGCAGAAATTAGGTCTGGGGATACTTAATAATGCCTTCGGCTGAGTCCTGCTCCTTCCAAAAC  
ACTTATGGACAACATATGAGGTCTCTGGGGGTACAGTCAGAGAGCTGGTGGAGGCCCTGAGACAAATGGGC

TACACCGAAGCAATTGAAGTGATCCAGGCAGCCTCCAGCCCAGTGAAGACCACCTCTCAGGCCCACTCGC  
TGCCTCTCTCGCCTGCCTCCACAAGGCAGCAAATAGACGAGCTCCGAGACAGTGACAGTGTCTGCGACAG  
CGGCGTGGAGACATCCTTCCGCAAACCTCAGCTTTACCGAGTCTCTGACCAGTGGTGCCTCACTGCTAACT  
CTCAACAAAATGCCCCATGATTATGGGCAGGAAGGACCTCTAGAAGGCAAATTTAGCCTGCTGACAATT  
TCCCACACCGTGTAACCAAAGCCCTAAAATTCCACTGCGTTGTCCACAAGACAGAAGCTGAAGTGCATC  
CAAAGGTGCTCAGAGAGCCGGCCCGCCTGAATCATTCTCGATTAACTCGAGACCTTTTCAACTTGGCTT  
CCTTTCTTGGTTCATAAATGAATTTTAGTTTGGTTCACCTACAGATAGTATCTAGCAATCACAACACTGG  
CTGAGCGGATGCATCTGGGGATGAGGTTGCTTACTAAGCTTTGCCAGCTGCTGCTGGATCACAGCTGCTT  
TCTGTTGTCATTGCTGTTGTCCCTCTGCTACGTTCTATTGTCATTAAAGGTATCACGGTCGCCACCTGG  
CATTCCTTCTGACCACAGCATCATTTTGCATTCAAATTAAGGGTTAAGAAAAGAGATATTTTAAAATGAG  
AGTCACTTGATGTGCCATTTTAAAAAAAAGGCATATTGCTTTTTCTAATGTGGTTATTTCTCTGATTTG  
CAAAAAAAAAAAAAAAAAAAAAAATACTTGTCAATATTTAAACATGGTTACAATCATTGCTGAAAATGGTATT  
TTCCCCCTTTTCTGCATTTTGTATTGTAAATATGTTTTTTAGATCAAATACTTTAAAGGAAAAAATGTT  
GGATTTATAAATGCTATTTTTTATTTTACTTTTATAATAAAAGGAAAAGCAAATTGATGACCTCA

>NM\_145285.3 Homo sapiens NK2 homeobox 3 (NKX2-3), mRNA

AGTGGCTGTAACAAAACCCAGACCCCCAGGTCCCGGCAATGGAGGCGATTTAGACTGGAGTGGGACCGC  
GTCTGTCAAAGCCCGACTCGGCAGCAGCGCGGAGTCCAGGAGGAGAGCTGGAGCCGCCGCGCTGCCTC  
CCCGCCCCCGCCGGGATTTATTATTTGGACTGGACAATTAAGTGGCCCTGATGATGTTACCAAGCCCGGT  
CACCTCCACCCCTTTCTCAGTCAAAGACATTTTGAATCTGGAGCAGCAGCACCAGCACTTCCATGGTGCG  
CACTTGACGGCGGACTTGGAGCACCCTTCCACTCTGCGCCCTGCATGCTGGCCGCCGCTGAGGGGACGC  
AATTTTCTGACGGAGGGGAGGAGGACGAGGAAGACGAGGGCGAGAAATTGTCCTATTTGAACTCACTAGC  
CGCAGCAGACGGCCACGGGGATTGAGGGCTGTGTCCCAGGGCTATGTCCACACGGTCCTGCGAGACTCG

TGCAGCGAGCCCAAGGAACATGAAGAGGAGCCCGAGGTCTGTGAGGGACCGGAGCCAAAAAGCTGCCAGC  
TGAAGAAGTCTCTAGAGACGGCCGGAGACTGCAAGGCGGCGGAGGAGAGCGAGAGGCCGAAGCCACGCAG  
CCGCCGGAAGCCCCGGGTCTCTTCTCGCAAGCCCAGGTCTTCGAGCTGGAACGCAGGTTCAAGCAGCAG  
CGGTACCTGTCGGCACCCGAGCGCGAGCACCTCGCCAGCAGCCTGAAGCTCACATCCACTCAGGTGAAAA  
TCTGGTTCAGAATCGCAGGTACAAGTGCAAGAGACAGCGGCAGGACAAGTCTCTGGAGCTTGCGGCACA  
CGCGCCCCCGCCGCCGCGCGCGTGGCTGTCCCGGTGCTGGTGCGGGACGGCAAGCCGTGCGTCACG  
CCCAGCGCGCAGGCCTACGGCGCGCCCTACAGCGTGGGCGCCAGCGCCTACTCCTACAACAGCTTCCCCG  
CCTACGGCTATGGGAACTCGGCCGCGCCGCCGCCGCCGCCGCCGCCGCGCAGCAGCGGCGGCCTA  
CAGCAGCAGCTATGGCTGTGCGTACCCGGCGGGCGGCGGCGGCGGCGGCGGGACCTCCGCGGCGACC  
ACTGCCATGCAGCCCGCTGCAGCGCGGCCGGAGGCGGCCCTTTGTGAACGTGAGCAACCTAGGAGGCT  
TCGGCAGCGGCGGCAGCGCACAGCCGTTGCACCAGGGTACTGCAGCCGGGGCCGCGTGCCTCAGGGCAC  
CTTGCAAGGCATCCGGGCCTGGTAGGGACGGGGCGGGTCACGCGGCGGGCACCCAGCGCAGCCTGGCGC  
CGCGGGACTGAAGCTCGAGAAGGGCCTGACCTAAAGGTCAGGTCCCCTCGTTAAAAAATATGTACGTCT  
AGCTCCTCAGGGCTTCGGATCGCAGCTCACTCGAGGCCTGGGGAAGGGGACTCAGGGGCGAGGAGGATGA  
CTGGGTCCGGTCGCCAGGACTGTCTCTGAGGCAGAAACGCCGGCTGGGCGCCGGGGAGGACGATGGCCCC  
GACCCTGGCAGCGAGAGGAGACCAGGAGGCTAGGACCCTGGCCGCGCTTGGTTCTTCAAAGCGAGAAGG  
GCTTCTCTCCCTCTGCCTTCCGCGGCCTCCGCGAAGCGTTGGCGGGGAGCCCAAGGACATAACAAATTA  
AAAGCATGAAGGAGAGAAAAATGGGGGTCTGTGGCTTGAGAAATTCAGGCCCTACCGATCCTCTGCCCC  
TTTGCGGGCCTGGAGCGCCATAGCACAGTCGATTTGTTTTGCAGCTGTCTCCCCTCCGCAGCAGATACC  
TCGGTCCAGATCTCCGATTGTCGGGGGACGCAGGACTCTTCGAGGAAAACCAGCCGAATGAGATCAAAA  
GTTGGGGGTGGGGGGAGGCTGAACAAACTCAGGACCTGGTGGCCACCGGAGGTGTTACCGGGTTTCCTT  
TCTGTTTCGTATTCTGTATTCAGCACATGTTATCTATCTATCTATATAACTATAACACACGCCGT  
GTAGACACCCGCTGCCACACACTACAGGAGTCAATAACAAGGTGCAATATTTTCAA

>NM\_021209.4 Homo sapiens NLR family CARD domain containing 4 (NLRC4), transcript variant 1, mRNA

AAGCCCCTGGCTGTTTATACTCCGGAGGGTGTCCCGTGCGTCATCGGTGGAGTGGACCAAACTGGTGA  
TCTGTTTGCCCTGTGTGACCTTGCCAGAACCCTGCTGACTGAGAGAACACATCTGCTGGAAGTCCTCTG  
GGATTCAAGGTACAGGGAATGAAGAGTAGTTTTACAGAAAAAGAGGACAATATTGGGATCACCTTTGAC  
CTTTCCATTTGGAAATAATATTTTCTATTGTGTTATAGAAAGGTGGGAAGCTTTCATCCAGAACAATGAA  
TTTCATAAAGGACAATAGCCGAGCCCTTATTCAAAGAATGGGAATGACTGTTATAAAGCAAATCACAGAT  
GACCTATTTGTATGGAATGTTCTGAATCGCGAAGAAGTAAACATCATTGCTGCGAGAAGGTGGAGCAGG  
ATGCTGCTAGAGGGATCATTACATGATTTTGAAAAAGGGTTCAGAGTCCTGTAACTCTTTCTTAAATC  
CCTTAAGGAGTGGAACATCCTCTATTTTCAGGACTTGAATGGACAAAGTCTTTTTCATCAGACATCAGAA  
GGAGACTTGGACGATTTGGCTCAGGATTTAAAGGACTTGTACCATAACCCATCTTTTCTGAACTTTTATC  
CCCTTGGTGAAGATATTGACATTATTTTAACTTGAAAAGCACCTTCACAGAACCTGTCCTGTGGAGGAA  
GGACCAACACCATCACCGCGTGGAGCAGCTGACCCTGAATGGCCTCCTGCAGGCTCTTCAGAGCCCCTGC  
ATCATTGAAGGGGAATCTGGCAAAGGCAAGTCCACTCTGCTGCAGCGAATTGCCATGCTCTGGGGCTCCG  
GAAAGTGCAAGGCTCTGACCAAGTTCAAATTCGTCTTCTCCTCCGTCTCAGCAGGGCCCAGGGTGGACT  
TTTTGAAACCCTCTGTGATCAACTCCTGGATATACCTGGCACAATCAGGAAGCAGACATTCATGGCCATG  
CTGCTGAAGCTGCGGCAGAGGGTCTTTTCTTCTTGATGGCTACAATGAATTCAAGCCCCAGAACTGCC  
CAGAAATCGAAGCCCTGATAAAGGAAAACACCGCTTCAAGAACATGGTCATCGTCACCACTACCACTGA  
GTGCCTGAGGCACATACGGCAGTTTGGTGCCTGACTGCTGAGGTGGGGGATATGACAGAAGACAGCGCC  
CAGGCTCTCATCCGAGAAGTGCTGATCAAGGAGCTTGCTGAAGGCTTGTTGCTCCAAATTCAGAAATCCA  
GGTGCTTGAGGAATCTCATGAAGACCCCTCTCTTGTGGTCATCACTTGTCGAATCCAGATGGGTGAAAG  
TGAGTTCCACTCTCACACACAAACAACGCTGTTCCATACCTTCTATGATCTGTTGATACAGAAAAACAAA  
CACAAACATAAAGGTGTGGCTGCAAGTGACTTCATTCGGAGCCTGGACCACTGTGGAGACCTAGCTCTGG  
AGGGTGTGTTCTCCACAAGTTTGATTCGAACTGCAGGATGTGTCCAGCGTGAATGAGGATGTCTCTGCT  
GACAACTGGGCTCCTCTGTAAATATACAGCTCAAAGGTTCAAGCCAAAGTATAAATTCTTTCACAAGTCA

TTCCAGGAGTACACAGCAGGACGAAGACTCAGCAGTTTATTGACGTCTCATGAGCCAGAGGAGGTGACCA  
AGGGGAATGGTTACTTGCAGAAAATGGTTTCCATTTCCGACATTACATCCACTTATAGCAGCCTGCTCCG  
GTACACCTGTGGGTCATCTGTGGAAGCCACCAGGGCTGTTATGAAGCACCTCGCAGCAGTGTATCAACAC  
GGCTGCCTTCTCGGACTTTCCATCGCCAAGAGGCCTCTCTGGAGACAGGAATCTTTGCAAAGTGTGAAAA  
ACACCACTGAGCAAGAAATTCTGAAAGCCATAAACATCAATTCCTTTGTAGAGTGTGGCATCCATTTATA  
TCAAGAGAGTACATCCAAATCAGCCCTGAGCCAAGAATTTGAAGCTTTCTTTCAAGGTAAAAGCTTATAT  
ATCAACTCAGGGAACATCCCCGATTACTTATTTGACTTCTTTGAACATTTGCCCAATTGTGCAAGTGCCC  
TGGACTTCATTAAACTGGACTTTTATGGGGGAGCTATGGCTTCATGGGAAAAGGCTGCAGAAGACACAGG  
TGGAATCCACATGGAAGAGGGCCCCAGAAACCTACATTCCCAGCAGGGCTGTATCTTTGTTCTTCAACTGG  
AAGCAGGAATTCAGGACTCTGGAGGTCACACTCCGGGATTTAGCAAGTTGAATAAGCAAGATATCAGAT  
ATCTGGGGAAAATATTCAGCTCTGCCACAAGCCTCAGGCTGCAAATAAAGAGATGTGCTGGTGTGGCTGG  
AAGCCTCAGTTTGGTCCTCAGCACCTGTAAGAACATTTATTCTCTCATGGTGGAAGCCAGTCCCCTCACC  
ATAGAAGATGAGAGGCACATCACATCTGTAACAAACCTGAAAACCTTGAGTATTCATGACCTACAGAATC  
AACGGCTGCCGGGTGGTCTGACTGACAGCTTGGGTAACCTGAAGAACCTTACAAAGCTCATAATGGATAA  
CATAAAGATGAATGAAGAAGATGCTATAAACTAGCTGAAGGCCTGAAAACCTGAAGAAGATGTGTTTA  
TTTCATTTGACCCACTTGTCTGACATTGGAGAGGGAATGGATTACATAGTCAAGTCTCTGTCAAGTGAAC  
CCTGTGACCTTGAAGAAATTCAATTAGTCTCCTGCTGCTTGTCTGCAAATGCAGTGAAAATCCTAGCTCA  
GAATCTTCACAATTTGGTCAAACCTGAGCATTCTTGATTTATCAGAAAATTACCTGGAAAAAGATGGAAAT  
GAAGCTCTTCATGAACTGATCGACAGGATGAACGTGCTAGAACAGCTCACCGCACTGATGCTGCCCTGGG  
GCTGTGACGTGCAAGGCAGCCTGAGCAGCCTGTTGAAACATTTGGAGGAGGTCCCACAACCTCGTCAAGCT  
TGGGTTGAAAACTGGAGACTCACAGATACAGAGATTAGAATTTTAGGTGCATTTTTTGGAAAGAACCTT  
CTGAAAACTTCCAGCAGTTGAATTTGGCGGGAAATCGTGTGAGCAGTGATGGATGGCTTGCCTTCATGG  
GTGTATTTGAGAATCTTAAGCAATTAGTGTTTTTTGACTTTAGTACTAAAGAATTTCTACCTGATCCAGC  
ATTAGTCAGAAAACCTTAGCCAAGTGTTATCCAAGTAACTTTTCTGCAAGAAGCTAGGCTTGTTGGGTGG  
CAATTTGATGATGATGATCTCAGTGTTATTACAGGTGCTTTTAACTAGTAACTGCTTAAATAAAGTGTA

CTCGAAGCCAGTAAAAAAAAAAAA

>NM\_000271.5 Homo sapiens NPC intracellular cholesterol transporter 1 (NPC1), mRNA

CTTCCTGACCGGCGCGCGCAGCCTGCTGCCGCGGTGAGCGCCTGCTCCTGCTCCTCCGCTCCTCCTGCGC  
GGGGTGCTGAAACAGCCCGGGGAAGTAGAGCCGCTCCGGGGAGCCCAACCAGCCGAACGCCGCCGGCGT  
CAGCAGCCTTGCGCGGCCACAGCATGACCGCTCGCGGCCTGGCCCTTGGCCTCCTCCTGCTGCTACTGTG  
TCCAGCGCAGGTGTTTTACAGTCCTGTGTTTGGTATGGAGAGTGTGGAATTGCATATGGGGACAAGAGG  
TACAATTGCGAATATTCTGGCCACCAAAACCATTGCCAAAGGATGGATATGACTTAGTGCAGGAACCTCT  
GTCCAGGATTCTTCTTTGGCAATGTCAGTCTCTGTTGTGATGTTCCGGCAGCTTCAGACACTAAAAGACAA  
CCTGCAGCTGCCTCTACAGTTTCTGTCCAGATGTCCATCCTGTTTTTATAACCTACTGAACCTGTTTTGT  
GAGCTGACATGTAGCCCTCGACAGAGTCAGTTTTTGAATGTTACAGCTACTGAAGATTATGTTGATCCTG  
TTACAAACCAGACGAAAACAAATGTGAAAGAGTTACAATACTACGTCGGACAGAGTTTTGCCAATGCAAT  
GTACAATGCCTGCCGGGATGTGGAGGCCCCCTCAAGTAATGACAAGGCCCTGGGACTCCTGTGTGGGAAG  
GACGCTGACGCCTGTAATGCCACCAACTGGATTGAATACATGTTCAATAAGGACAATGGACAGGCACCTT  
TTACCATCACTCCTGTGTTTTCAGATTTTCCAGTCCATGGGATGGAGCCCATGAACAATGCCACCAAAGG  
CTGTGACGAGTCTGTGGATGAGGTCACAGCACCATGTAGCTGCCAAGACTGCTCTATTGTCTGTGGCCCC  
AAGCCCCAGCCCCACCTCCTCCTGCTCCCTGGACGATCCTTGGCTTGGACGCCATGTATGTCATCATGT  
GGATCACCTACATGGCGTTTTTGTCTGTGTTTTTGGAGCATTTTTTGCAGTGTGGTGCTACAGAAAACG  
GTATTTTGTCTCCGAGTACACTCCCATCGATAGCAATATAGCTTTTTCTGTTAATGCAAGTGACAAAGGA  
GAGGCGTCCTGCTGTGACCCTGTCAGCGCAGCATTTGAGGGCTGCTTGAGGCGGCTGTTACACGCTGGG  
GGTCTTTCTGCGTCCGAAACCCTGGCTGTGTCATTTTCTTCTCGCTGGTCTTCATTACTGCGTGTTTCGTC  
AGGCCTGGTGTTTGTCCGGGTCACAACCAATCCAGTTGACCTCTGGTCAGCCCCCAGCAGCCAGGCTCGC  
CTGGAAAAAGAGTACTTTGACCAGCACTTTGGGCCTTTCTTCCGGACGGAGCAGCTCATCATCCGGGCC  
CTCTCACTGACAAACACATTTACCAGCCATACCCTTCGGGAGCTGATGTACCCTTTGGACCTCCGCTTGA

CATACAGATACTGCACCAGGTTCTTGACTTACAAATAGCCATCGAAAACATTACTGCCTCTTATGACAAT  
GAGACTGTGACACTTCAAGACATCTGCTTGGCCCCTCTTTCACCGTATAACACGAACTGCACCATTTTGA  
GTGTGTTAAATTACTTCCAGAACAGCCATTCCGTGCTGGACCACAAGAAAGGGGACGACTTCTTTGTGTA  
TGCCGATTACCACACGCACTTTCTGTA CTGCGTACGGGCTCCTGCCTCTCTGAATGATACAAGTTTGCTC  
CATGACCCTTGTCTGGGTACGTTTGGTGGACCAGTGTTCCCGTGGCTTGTGTTGGGAGGCTATGATGATC  
AAA ACTACAATAACGCCACTGCCCTTGTGATTACCTTCCCTGTCAATAATTACTATAATGATACAGAGAA  
GCTCCAGAGGGCCCAGGCCTGGGAAAAAGAGTTTATTAATTTTGTGAAAACTACAAGAATCCCAATCTG  
ACCATTTCTTCACTGCTGAACGAAGTATTGAAGATGAACTAAATCGTGAAAGTGACAGTGATGTCTTCA  
CCGTTGTAATTAGCTATGCCATCATGTTTCTATATATTTCCCTAGCCTTGGGGCACATGAAAAGCTGTGCG  
CAGGCTTCTGGTGGATTCTGAAGGTCTCACTAGGCATCGCGGCATCTTGATCGTGCTGAGCTCGGTGGCT  
TGCTCCTTGGGTGTCTTCAGCTACATTGGGTTGCCCTTGACCCTCATTGTGATTGAAGTCATCCCGTTCC  
TGGTGCTGGCTGTTGGAGTGGACAACATCTTCATTCTGGTGCAGGCCTACCAGAGAGATGAACGTCTTCA  
AGGGGAAACCCTGGATCAGCAGCTGGGCAGGGTCTAGGAGAAAGTGGCTCCCAGTATGTTCTGTCTATCC  
TTTTCTGAGACTGTAGCATTTTTCTTAGGAGCATTGTCCGTGATGCCAGCCGTGCACACCTTCTCTCTCT  
TTGCGGGATTGGCAGTCTTCATTGACTTTCTTCTGCAGATTACCTGTTTCGTGAGTCTCTTGGGGTTAGA  
CATTAAACGTCAAGAGAAAAATCGGCTAGACATCTTTTGCTGTGTCAGAGGTGCTGAAGATGGAACAAGC  
GTCCAGGCCTCAGAGAGCTGTTTGTTTCGCTTCTTCAAAAACCTCTATTCTCCACTTCTGCTAAAGGACT  
GGATGAGACCAATTGTGATAGCAATATTTGTGGGTGTTCTGTCAATCAGCATCGCAGTCTGAACAAAGT  
AGATATTGGATTGGATCAGTCTCTTTCGATGCCAGATGACTCCTACATGGTGGATTATTTCAAATCCATC  
AGTCAGTACCTGCATGCGGGTCCGCTGTGTACTTTGTCTGGAGGAAGGGCACGACTACACTTCTTCCA  
AGGGGCAGAACATGGTGTGCGGCGGCATGGGCTGCAACAATGATTCCCTGGTGCAGCAGATATTTAACGC  
GGCGCAGCTGGACA ACTATACCCGAATAGGCTTCGCCCCCTCGTCCTGGATCGACGATTATTTGACTGG  
GTGAAGCCACAGTCGTCTTGCTGTGAGTGGACAATATCACTGACCAGTTCTGCAATGCTTCAGTGGTTG  
ACCCTGCCTGCGTTCGCTGCAGGCCTCTGACTCCGGAAGGCAAACAGAGGCCTCAGGGGGGAGACTTCAT  
GAGATTCTGCCCATGTTCTTTTCGGATAACCCTAACCCCAAGTGTGGCAAAGGGGGACATGCTGCCTAT

AGTTCTGCAGTTAACATCCTCCTTGGCCATGGCACCAGGGTCGGAGCCACGTA CTTCATGACCTACCACA  
CCGTGCTGCAGACCTCTGCTGACTTTATTGACGCTCTGAAGAAAGCCCGACTTATAGCCAGTAATGTCAC  
CGAAACCATGGGCATTAACGGCAGTGCCTACCGAGTATTTCTTACAGTGTGTTTTATGTCTTCTACGAA  
CAGTACCTGACCATCATTGACGACACTATCTTCAACCTCGGTGTGTCCCTGGGCGCGATATTTCTGGTGA  
CCATGGTCCTCCTGGGCTGTGAGCTCTGGTCTGCAGTCATCATGTGTGCCACCATCGCCATGGTCTTGGT  
CAACATGTTTGGAGTTATGTGGCTCTGGGGCATCAGTCTGAACGCTGTATCCTTGGTCAACCTGGTGATG  
AGCTGTGGCATCTCCGTGGAGTTCTGCAGCCACATAACCAGAGCGTTCACGGTGAGCATGAAAGGCAGCC  
GCGTGGAGCGCGCGGAAGAGGCACTTGCCACATGGGCAGCTCCGTGTTCAGTGGAATCACACTTACAAA  
ATTTGGAGGGATTGTGGTGTGGCTTTTGCCAAATCTCAAATTTTCCAGATATTCTACTTCAGGATGTAT  
TTGGCCATGGTCTTACTGGGAGCCACTCACGGATTAATATTTCTCCCTGTCTTACTCAGTTACATAGGGC  
CATCAGTAAATAAAGCCAAAAGTTGTGCCACTGAAGAGCGATACAAAGGAACAGAGCGCGAACGGCTTCT  
AAATTTCTAGCCCTCTCGCAGGGCATCCTGACTGAACTGTGTCTAAGGGTCGGTCGGTTTACCACTGGAC  
GGGTGCTGCATCGGCAAGGCCAAGTTGAACACCGGATGGTGCCAACCATCGGTTGTTTGGCAGCAGCTTT  
GAACGTAGCGCCTGTGAACTCAGGAATGCACAGTTGACTTGGGAAGCAGTATTACTAGATCTGGAGGCAA  
CCACAGGACACTAACTTCTCCCAGCCTCTTCAGGAAAGAAACCTCATTCTTTGGCAAGCAGGAGGTGAC  
ACTAGATGGCTGTGAATGTGATCCGCTCACTGACACTCTGTAAAGGCCAATCAATGCACTGTCTGTCTCT  
CCTTTTAGGAGTAAGCCATCCCACAAGTTCTATACCATATTTTTAGTGACAGTTGAGGTTGTAGATACAC  
TTTATAACATTTTATAGTTTAAAGAGCTTTATTAATGCAATAAATTAAC TTTGTACACATTTTATATAA  
AAAAACAGCAAGTGATTTTCAGAATGTTGTAGGCCTCATTAGAGCTTGGTCTCCAAAAATCTGTTTGAAAA  
AAGCAACATGTTCTTCACAGTGTTCCTTAGAAAGGAAGAGATTTAATTGCCAGTTAGATGTGGCATGAA  
ATGAGGGACAAAGAAAGCATCTCGTAGGTGTGTCTACTGGGTTTTAACTTATTTTCTTTAATAAAATAC  
ATTGTTTTCTAAGTTTTGGGGTTACCCTATCTGCTTTGAGAGACAAATACAAAAGCTAAATGGAAGAGA

>NM\_030759.5 Homo sapiens nuclear receptor binding factor 2 (NRBF2), transcript variant 1, mRNA

GCTCCTTCAGCGCCTATCGCTGGCTCTTGGGGCGCAGAGAGGGGCCGAGTCTCCGCGGCTGCGTCGAGC  
TCCCTTGCACTCCCTCCATGTTCCCCGGCGCCACTACTCCCTTCCTAAGGCCGCGCTTACCCCGGGG  
TCTATGGAAGTAATGGAAGGACCCCTCAACCTGGCTCATCAACAGAGCAGACGAGCAGACCGTTTATTAG  
CTGCAGGCAAATACGAAGAGGCTATTTCTTGTACAAAAAGGCTGCAGCATATCTTTCTGAAGCCATGAA  
GCTGACACAGTCAGAGCAGGCTCATCTTTCACTGGAATTGCAAAGGGATAGCCATATGAAACAGCTCCTC  
CTCATCCAAGAGAGATGGAAGGGGCCAGCGTGAAGAAAGATTGAAAGCCCAGCAGAACACAGACAAGG  
ATGCAGCTGCCCATCTTCAGACATCTCACAACCCCTCTGCAGAGGATGCAGAGGGCCAGAGTCCCTTTTC  
TCAGAAGTACAGCCCTTCCACAGAGAAATGCCTGCCTGAGATTCAGGGGATCTTTGACAGGGATCCAGAC  
ACACTACTTTATTTACTTCAGCAAAAGAGTGAGCCAGCAGAGCCATGTATTGGAAGCAAAGCCCCAAAAG  
ATGATAAAACAATTATAGAGGAGCAGGCAACCAAAATTGCAGATTTGAAGAGGCATGTGGAATTCCTTGT  
GGCTGAGAATGAAAGATTAAGGAAAGAAAATAAACAACTAAAGGCTGAAAAGGCCAGACTTCTAAAAGGT  
CCAATAGAAAAGGAGCTGGATGTAGATGCTGATTTTGTAGAAACGTCAGAGTTATGGAGCTTGCCACCAC  
ATGCAGAAACTGCTACAGCCTCCTCAACCTGGCAGAAGTTCGCAGCAAATACTGGGAAAGCCAAGGACAT  
TCCAATCCCCAATCTTCCTCCCTTGGATTTTCCATCTCCAGAACTTCCTCTTATGGAGCTCTCTGAGGAT  
ATTCTGAAAGGATTTATGAATAATTAAATGGAAGGCCACAGAAAAGGGGAAAAGAGGAAATAATACAGT  
AATCGTTAATCCAGCAAAAAGAAATGAAAAGGGAAAACCATAGAAAGGGTAATCCCGGAAATGCTTCAT  
CTGGTGGACTGTGGGAGCAGAGGCATTGCCAGGACTTGGGAAACAGTCACTGTGAAATGCGCTGCGTATC  
TCATTCACCTCACTTCAGCTAATGATTCCGACTTGGCAGACGCTAACTCATGGAGGTTTCGTTTTCTCCTG  
ATACAAACCAAATGGCTACCTGGAAGAATTTCTTTCAAGCAACAGTTATTTTTCTTATCTTCAGGGTTAA  
AATGTATAAAAGTTATGTGTAATTAATCTATAATGCCATAAATGATAATGCAAAACCTAAATAATATGGT  
GGCCGGAGGGGCTGCCTTATATTTGAAACATGCTTTCTATCATGCATTGACTGTATGCATTTTGTTAATG  
CACATTCTGTTTGTTAAGGTGTGTAAGATACACACCCTTCTAGATGAAACTATATGTGCCACACTTTGC  
ACTACTCATAATGATAACCTCAAGACTATCAGAAGAAATATTTAAATTTCCATTTTATGAAGAAAGGAAC  
CAAATTATTATGCTTTTTAAACAAATTACCAGTTTACATAATTAATCAGGGTGCATTTTAAGTTCTAAC

TTCGTTTATTGTATAATGCATCATTTGAAAATACCAAGGAGGAAATACCCTTTGTTTTTAATGATGCAAG  
AGTGGACGTAATGCTAGTTGGCAGTATTTTATTGTAAGAAATCAATAAAGTAATTGTGTTTTA

>NM\_001159995.3 Homo sapiens neuregulin 1 (NRG1), transcript variant HRG-beta1c, mRNA  
AGTAAGCCTCCGCAGCCCACTCGGACTGCAGCCTGTTTGCCGCCCGTCCTCCCATTGCAGCACTCGGGGC  
GACAGAGAGGGAGGAGGCGCGCGGGGACGGGGACGCCAGGAGGACCACTCGCGGGTCCCGCTCCGCTC  
CGGCAGCAGCATGGGGAAAGGACGCGCGGGGCCGAGTTGGCACCACAGCCTTGCCTCCCCGATTGAAAGAG  
ATGAAAAGCCAGGAATCGGCTGCAGGTTCCAACTAGTCCTTCGGTGTGAAACCAGTTCTGAATACTCCT  
CTCTCAGATTCAAGTGGTTCAAGAATGGGAATGAATTGAATCGAAAAACAAACCACAAAATATCAAGAT  
ACAAAAAAGCCAGGGAAGTCAGAACTTCGCATTAACAAAGCATCACTGGCTGATTCTGGAGAGTATATG  
TGCAAAGTGATCAGCAAATTAGGAAATGACAGTGCCTCTGCCAATATCACCATCGTGAATCAAACGAGA  
TCATCACTGGTATGCCAGCCTCAACTGAAGGAGCATATGTGTCTTCAGCTACATCTACATCCACCACTGG  
GACAAGCCATCTTGTAATGTGCGGAGAAGGAGAAAACCTTCTGTGTGAATGGAGGGGAGTGCTTCATG  
GTGAAAGACCTTTCAAACCCCTCGAGATACTTGTGCAAGTGCCCAAATGAGTTTACTGGTGATCGCTGCC  
AAACTACGTAATGGCCAGCTTCTACAAGCATCTTGGGATTGAATTTATGGAGGCGGAGGAGCTGTACCA  
GAAGAGAGTGCTGACCATAACCGGCATCTGCATCGCCCTCCTTGTGGTCGGCATCATGTGTGTGGTGGCC  
TACTGCAAAACCAAGAAACAGCGGAAAAAGCTGCATGACCGTCTTCGGCAGAGCCTTCGGTCTGAACGAA  
ACAATATGATGAACATTGCCAATGGGCCTCACCATCCTAACCCACCCCCGAGAATGTCCAGCTGGTGAA  
TCAATACGTATCTAAAAACGTATCTCCAGTGAGCATATTGTTGAGAGAGAAGCAGAGACATCCTTTTCC  
ACCAGTCACTATACTTCCACAGCCCATCACTCCACTACTGTCACCCAGACTCCTAGCCACAGCTGGAGCA  
ACGGACACACTGAAAGCATCCTTTCCGAAAGCCACTCTGTAATCGTGATGTCATCCGTAGAAAACAGTAG  
GCACAGCAGCCCAACTGGGGGCCCAAGAGGACGTCTTAATGGCACAGGAGGCCCTCGTGAATGTAACAGC  
TTCCTCAGGCATGCCAGAGAAACCCCTGATTCTACCGAGACTCTCCTCATAGTGAAAGGTATGTGTCAG

CCATGACCACCCCGGCTCGTATGTCACCTGTAGATTTCCACACGCCAAGCTCCCCAAATCGCCCCCTTC  
GGAAATGTCTCCACCCGTGTCCAGCATGACGGTGTCCATGCCTTCCATGGCGGTCAGCCCCTTCATGGAA  
GAAGAGAGACCTCTACTTCTCGTGACACCACCAAGGCTGCGGGAGAAGAAGTTTGACCATCACCTCAGC  
AGTTCAGCTCCTTCCACCACAACCCCGCGCATGACAGTAACAGCCTCCCTGCTAGCCCCCTTGAGGATAGT  
GGAGGATGAGGAGTATGAAACGACCCAAGAGTACGAGCCAGCCCAAGAGCCTGTTAAGAACTCGCCAAT  
AGCCGGCGGGCCAAAAGAACCAAGCCCAATGGCCACATTGCTAACAGATTGGAAGTGGACAGCAACACAA  
GCTCCCAGAGCAGTAACTCAGAGAGTGAAACAGAAGATGAAAGAGTAGGTGAAGATACGCCTTTCCTGGG  
CATACAGAACCCCTGGCAGCCAGTCTTGAGGCAACACCTGCCTTCCGCCTGGCTGACAGCAGGACTAAC  
CCAGCAGGCCGCTTCTCGACACAGGAAGAAATCCAGGCCAGGCTGTCTAGTGTAAATTGCTAACCAAGACC  
CTATTGCTGTATAAACCTAAATAAACACATAGATTCACCTGTAAACTTTATTTTATATAATAAAGTAT  
TCCACCTTAAATTAACAATTTATTTTATTTTAGCAGTTCTGCAAATAGAAAACAGGAAAAAACTTTTA  
TAAATTAATATATGTATGTAAAAATGTGTTATGTGCCATATGTAGCAATTTTTTACAGTATTTCAAAAC  
GAGAAAGATATCAATGGTGCCTTTATGTTATGTTATGTGAGAGCAAGTTTTGTACAGTTACAGTGATTG  
CTTTCCACAGTATTTCTGCAAAACCTCTCATAGATTCAGTTTTTGCTGGCTTCTTGTGCATTGCATTAT  
GATGTTGACTGGATGTATGATTTGCAAGACTTGCAACTGTCCCTCTGTTTGCTTGTAGTAGCACCCGATC  
AGTATGTCTTGAATGGCACATCCATCCAGATATGCCTCTCTTGTGTATGAAGTTTTCTTTGCTTTCAGA  
ATATGAAATGAGTTGTGTCTACTCTGCCAGCCAAAGGTTTGCCTCATTGGGCTCTGAGATAATAGTAGAT  
CCAACAGCATGCTACTATTAAATACAGCAAGAACTGCATTAAGTAATGTTAAATATTAGGAAGAAAGTA  
ATACTGTGATTTAAAAAAAACCTATATTATTAATCAGAAGACAGCTTGCTCTTACTAAAAGGAGCTCTCAT  
TTACTTTATTTGATTTTATTTTCTTGACAAAAAGCAACAGTTTTAGGGATAGCTTAGAAAATGGGTTCT  
GGCTTGCTATCAGGGTAAATCTAACACCTTACAAGAGGACTGAGTGTCACTTTCTCTCTGGGGGAATGAT  
CCAGCAGCTTATCTAGTTGACAATCAAAACACGGCTGATAAAGGTGCAATCATTTCTGACATGTATTTT  
CACTGATTTTGAAGCTAGTGATTGGTTGTGTCTTCTTGCTCAAAAAGAAGCATATTACGGCACAAAAAG  
CCCAGCCCAGACAGCACATGCAGCATTTTGTCTGAAATACTTCTAGAGTCAAACGTGCCTGCTGTACATA  
GCGATGACTTGTCATCATAGGGAAGTATTTCCATCGTAGAGTGTTCAGAAGGAGTGACTGTATAGGTGGA

GAGAAGCTTAGTGACTCCGTTGAAATTTTAAAATGTGGATGACCACCCCTTTCTCCCCCTTATTTTCTT  
TTATCTTTCCATGTTGCCTTGATCAGGTCATAACTATGCATGAACATTTTTTATCAGGAATGGCCGATGT  
GTATGTGATTTGTAATCACAAGTAATGATTCATCAGGAAATGTCAATCCTGTTGGAAAGATTGCACCTTT  
ACTTGCAGAAGTGACCCCCACCTGTGTCCTGACCTCTCCATTTACAGGCTCTCTACCCATTTCCCCAC  
CTCCTTTAATTTTTGCTTTACTGTCATAAAGTAGGACTAAGATTGGTCTAAGCATTGCATGTTCTTTGT  
GATGGTAAATCCAAAGGAAGGCCTATAAGTATTAACATTTGAAATAACTGCTAATTCAGGAAAATGGAAG  
AAAAAAATTATTTGAAACACAGAACCCATTTTCATGGCCTGCCTGATATCTGTGAAATCAGGGCTGGAGC  
TTTACTTAGGATTCACATGGCCTCCTAGGAACCATGGGACAAATGGGAAACAGGTTATCGGGGGATTTCAT  
GAAGTCAGTGAGAGTAATTGCTTCTTTTTGCGGGTGAAGTGAATGTATTTCTTCACCAAATCTTGATGT  
TAACAATTAAGAAAGAAATGACATGCAAGTAGGTCTTAGCAGAAAAATGCAGGCTGGGCATGAGTCAT  
GTTGTTACCCTCCCACATGCTCCTACAATCCACAGAGATGCCTGTCTGCAGGTTCTTGAAGTTATTGTTA  
GTATTTGGTATCTCAAATTTTTCGTCACTGTTACATGCCACTTTCTCTGTGCACAGTGGTATCCTCATT  
TGCTTTTAACTTACCTGAGGAGTCTTTGTCAGGTTGCACTGATTTTCCAATTCTGCAGTAATGAGTAA  
GCTCACGGCATGGGGAAGAAGACAGTCAGTCCAATGAAGTTCTCTAAATTATTTAACATTGCCTTTGAA  
GGCCTTGACTCATCCTTAGCTATTTCAATGAAGAAATTCCTACCATGAATTTAAACCCTAAAAATTCTG  
TTTCAAATTCTTTGGGCATTGGGGTACTCAGATATCCCATTTGTGGAAGAATTTAAGAATAAATAGAAGT  
TTCTGTTGAGAACCATGAGCAACATGTTTCTTACAATGAGAATTGCTATGCATTTTAAAATTGCAAATAT  
ATATGAAAATTGAAGACAAGAGGAAATTGTATTTCTAACTTGATTCTGATCACTCACAGAGGTGGCATAT  
TATTATAGTTGGGACATCCTTTGCACCCTTCATAAAAAAGGCCAGCTGACTGCTCAGCATCACCTGCCAA  
GGCCACTAGATTTGTGTTTACAGGGGTATCTCTGTGATGCTTGTACATCACTCTTGACCACCTCTGTTA  
ATAAATTCCGACAGTGCAGTGGCGATCGGAGTGTGAACCTTATGTTCCAGCATATGGAAAGCTATCTTAG  
GTTTAAAGGTAGTAGAAATTGCCAGGAGTTTGACAGCAACTTTGTTTCCCGGGTCTAAAATCGTATCCC  
ACTGAGGTGTATGCAGTGGAGCATAATACATGCAAATACATGCAAACTCCTTTTGTTCACCTAAGATT  
CACTTTCTATCTTACTTTCCCTTCCTGCCTAGTGTGACTTTTGCCCCAAGAGTGCCTGGACAGCATTCT  
AGTTTCTACAAAATGGTCCTCTGTGTAGGTGAATGTGTCCCAAACCTGCTATCACTTTCTTGTTTCAGTG

TGACTGTCTTGTTAGAGGTGAAGTTTATCCAGGGTAACTTGCTCACTAACTATTCCTTTTTATGGCCTGG  
GGTTAAAGGGCGCATGGCTCACACTGGTGAAAATAAGGAAGGCCTGGTCTTATCTTGATTAATAATACT  
GGCTGCATTCCACCAGCCAGAGATTTCTATCTGCGAAGACCTATGAAACACTGAAGAGAAATGTAGGCAG  
AAGGAAATGGCCACATATCACAAGTTCTATTATATATTCTTTTGTAATACATATTGTATATTACTTGGA  
TGTTTTCTTATATCATTTACTGTCTTTTGAGTTAATGTCAGTTTTTACTCTCTCAACTACTATGTAAC  
ATTGTAAATAACATAATGTCCTTTATTATTTATATTTAAGCATCTAACATATAGAGTTGTTTTCATATAA  
GTTTAAGATAAATGTCAAAAATATATGTTCTTTGTTTTCTTGCTTTAAAATTATGTATCTTTTCCT  
TTCTTTTTTTAAGAATAATTTATTGTTGAGGAGAAAGAATGTATATGTAAGTAACTATCTGAAGAAT  
GCACATTGAAGGCCGTGAGGTACTGATAAACTAAAGAATTTATTATTCAAATACTAAGCAATAAGTAAT  
TGTGATTTATTTAAAGTTTTGTCCATTTCCATGAAAGACATACTGCAATAAAAAATGCTACTCTGTGGAG  
ACCTGGGAGTGTTGCTCAGCAGACTACAGCTTCAGTCTGTTAGACCAGCACCTTCATCTCATTCCCATA  
GTTATGCTAATTTAGGATTGTGTTCCATGGACCCCATGATCACCTTGTCTATACGTTGCTTCTTGTCTGT  
CCATTGCTTTTGCCACACCACCTGTTCTCAAATCATCTCCTCCCTACCAATGCTGTTTATCACTTTCTTC  
CTTGTTGAAGAGGCCACACAACCAGACAGTACTATGCTTCCTTTTTCTCCATACACAATAACAGAGAGA  
GAATATTCTAGGGCATGACTGCCTGGATCCTGGCTGTTGCTATCTTTGTAGTGGCAGTAAGAACTCCT  
TCAGACTAATGAAAATGTCAACGTGCCATTCAATCACGAAAGGTAACGAAAAATGCTCTCATGGTTCAAA  
TAGTCCAATGGCCCATAGTGGCCTAAAAGGCAGCCAGTTGACACCTGGCCATGCTAAGCTTCCTTATACC  
ATCCGCTAATGACTTTCCATTGGGCCCACAATTTACGGATTCATAATTTAAAAGAGGAGAAGGCCAAGT  
TAGGTTCAATCCCCTTATTCTGTCAATAAAACAAATCAAACCTCATGTCTATCTAACTGCTCAGGGAGGAG  
CCTTG CATGAGAAAATTCTCATATTCTAAGACTGAGTCATAGAAATGAGGGTATTACTTTTCTTACTGC  
AATTAACCTAAACAAAAGCCATATTTTAACAAATAGATATTTGCATGGTACCCTTCATATATTCCAAGCA  
TTTCACTCATTATTCCAGGTAGGTTAAGAGCTTCTGAAGTGTATGAAGTAAAGGTCAGCAATCCTTTGGG  
GTGAACAGTGGCCTCCTTTGGAGTTTGGGGGTAACCTGAGACTTCCACCAATGTCCACCTCCATCTGTG  
TACCTAATTCCTATTACCTAGTTATGGCTCCTCTAGGATCATTTCAAACACTCTGGATGTCCAGGAAAT  
TTAAATTGTAGCTTTTGACTGAGCTAGTTTTCTATTATATTAATAAATTTTCAAAAATGCTTGAAAT

CTTCACATTTGCAACAACCTTTAGTTTTTCATGCACATACAAACACAGAGAGACAAAAATTCCAAACAGACA  
CTCTCCAAAAGCCACCACACTCTTCACTTGCTCTATAGTCATTTAGCCAACCAGCCATGCAGAGAATAT  
TTAAAACCTAAAGATTGAGACATTATTCTCAGTTTTTGCTGAGGCTTTGTAACGAAATTGAACACTATAA  
GCAGCTATTGTAGTAATTTTGGTTAAAATTGTTTGCCTGGGATATAGTATTTGAGGCAGAAGCACGTGTG  
TGAAGGAGGTGAGGTGGTTTGGAAAGAGTGAAGACTCGCAGCCAGATTGAATGTCTGGATAATTACTATA  
ATTCTCCCTTCTTGGTTGAAACCATGTTCTCTCTTGATTTTTAAACCCAGGCTGCCTCTGGAAACAAGCA  
AACCTGAGTCTTCTAACCTGAGTCTTCCAATCATTAGATTTCTTTCTGTCCTAACGATGAATGATAA  
AAGGACTTGATGTTACAATTTGGGGTTATAAGGCAGGTCTGAAATCTGGAGACTCAAGATGCTGGAAGG  
AGTGGAAGTTTTGATGACTTTATATGAATCACTTGGCACTCTATGTTTGGCTTGTCTCTTTGAAACTG  
ATTTACTAAAATAAATGTAAGGGAACCTATTACTCCAAAAGATTAACCTGGCAGGAAATACCAATACTTTC  
AGTTTATGAAAGACAAAACGTCTTGTGCTACAGGAAGCTGCAATGTTCTAACCTTTAAGGTTGGTGT  
TGAATAGGGTGGTCATGCCCTCCCCTGCAGGTATCTTTAGGCTCCTGTTGACCTCCTGGTACTATAACTG  
TTCGTCTTCTCTGGGTAGCTATTGATTTTGAACTTAACATGCTTCAAACTTTATTCATCAGGGAAATA  
GGAAAAGAGTTTTGTTACCTGGAGGAAATCTATTGTGATCTACCTGAGCTTTTTAAAAACAGACCAGGAG  
AAGGAAACCAGTAATTTTTAAAGAAGAGACAGAGAATGGGATAATAGTTTCACCCAGGATCTCTTTCTAA  
CCCTTCCCTTCAAATGAACTTATTGGAACAGAATTGGAAAGAAGAAAGGACATCTCTGCCCACCCACA  
GGATGCCAAAAAGGCTAAAGAATTACCTCTGTAGATTTAAACATCTTTAATGGCTTATGTATAGATTTGC  
TAATACAGAGAGAAATGAACTATTAATAAAAAATCACATTTTATAATATTTTTATGGCTTAAAACATCCT  
TTATCTCCTTTTTGTTCTCTCTACATGATATGGTAAGTGATGAGGAAAATTTAGGCTCAGGAAGGTAA  
ATCTTCTTGAGTTACACATCTAAGAGAGCTGCAGAGCTGACACTTGTAACCCAGGTTTTCTGACTGCAA  
ATCCAGTTTCTTCTATTGCGTTCTTCCCCTTCCCTGCCTCAAGCAGAAACAGGTTTTTTATTTTCAAC  
CTTTATGTATACAGTATGTTATGTTACATCTACAGCTAAGTTTCTTTTAGAAGAATGTGAGCCCTTCTA  
GCTTTGGTTTAGAGTGATTCTAGAAGCCAATTTCTTGGCTTAGTGATTCTATGCACCTTTCCTAAACTT  
AGCTTTCTAAGGAAATGAAGTGACGAGTGAGAATGAATTCACAATTCGACATGTAGGTAGCATCCTAA  
AGTGAAAAGAGGAGGAAATTTGTGGTCAAAGCACTCTCCCCACCACTTAGAACTTACTGACTGTGGGCA

GCTTCCTCCTCCAAGTTTCCTTCCTGATTTACAAGACCGTGGTGTGGTCAGGATTAACTTGAATACATG  
TAAGGAAGCCTGAAAGTGTCTAACACATAGCGAGTATTCAAATGCCACCTTCTATTTGATCCTTCCCCTC  
CAGTTCCTTAAGTTTTGGAATCTAGGTTTCTCAGTTCCAAATGGATTGACATTTGCATATCCCCATTGCA  
CAATGGATCAAATAAACTTTATGTTATCATTTCTCCAACATAGTGCCAGTAAGCAAATCCTTTTTAATAA  
CAACAGTATGTTGAGAAACATATCACCAAATAATTTAACTTTGTAGCTTTGATAAGTTCCTTAGGTTT  
TGGTTTTGGTTTTGTTTTCTGAGACAGGGTCTTGATCTGTCACCCAGACTGGAGTGCAATGGTTCAATTT  
TAGCTCACTGCAACCTGTAACCTCTGAGCTCAAGTGATCCTCCACCTCAGCCTCTCAAGTAGCTGGGAC  
TACAGGTGTGCTCCACCATGCCCAGCGATTTTTTTTTTTTTTTTTTTTTTTTTTTTGGTAGGGACAAGG  
TCTCGCTATGTTGCCAGGCTGGTCTTCAATTCCTGGCCTTAAGTGATCCTCCTGCCTCGGCCTCCCAAA  
GTGCTGGAATTACAGGCATGAGCCACCACCATAACTTTATGTTTGTTTTTTGATGCAGTATAAGTTCA  
GCTTGCTTCTTATGCAGCCATACCATTTTCATGTAACTCTGATTTTTAGCAGCTTATTACATTAGTGTTT  
TATTATTAATATAATTTTACAGAAATTTACTAAACCATGACTCTGTAGAGTTTTAATAATACTACCTCCA  
AACATCATTGCAAACATCTAGAAGAATGAACAAAAATGATCTTAGATCGACAGTATATCTGTTTGTCTTA  
GTTTCTACACAGGATGTTTCAGACATATTCCATTTCTTTAAAAAAAATATATATATATATATATATATA  
TAGGCCTGGCACGGTGGCTCATGACTGTAATCCCAGCACTTTGGGAGGCTTAGGCAGGCAAATCACCTGA  
GGTCAGGAGTTTGAGACTGGCCTGACCAACATGGTGAAACCTCGTCTCTATTAATAATTACAAAAATTAGC  
CGGGCGTGGTGGCACATGCCTGTAATCCCAGCTACTCGGGAGGCTGAGGCAGGAGAATCACTTGAACCTG  
GGAGGCAGAGGTTGCAGTGAGTTGAGATCACGCCATTGCACTCCAGCCTTGGTGACAAGAGTGAAACTCC  
GTCTCAAAAAAAAAAAAAATATGTATATATATATATATATATATATATATATATATATATATATATATAT  
AAAATCCCACCAAAGTCTGCAGAGTGACCAAATTAGACGGCTCTGGTTTCAGATTAAATTCTAAATGTG  
AGAAACCACATAGCTCCCATGATCCATCCAATAATTCCTCACGTCCTCTTCACTCTTTACTCCATGCATA  
AAACAGAATTTTTTTTTCTCATCCTGGGTATGAAGCAATTAATAATTTACGGATTTAGCCTATTTGGATT  
CAATCCCTTCAAACCTCATACTACATCCAAGGTGGAAGTGACTTAACTCTGATATCAATCATCAGGCTT  
GTAATATAGGCTTTGTTAATGGCAGGAGAGTCTAATAAACTTTCTGTTCTTATCCTTCATTTAAATGA  
AAAACCTTTTATTGAAAACAATCATAACTCTAGCTCATCATAAATATAATTCATGAGGACATTTTATTAT

TTTTATATTAAAGAAATAATATTATAGATGTAACTTTGCACCTTTCTAATTATTATCATGAGTTAAGCT  
AATACTTGTCTTCTGGTCCCTAGATGATGATTCTTTTTGCCTTACTGGAGGAGCCCTTGTCTTGAAGTG  
AGTTGCTTCAACAGCAGAGGACTTCTAGTTTCTCCAGTTGAGCCTAAAGTGAACTTTTATCTTCTTCA  
GAGGAAGGGGCTTCCTTGATTTGTACTTTTGTGGCTCCTCAGATAACACAGACAATTTATCTTGGATCC  
CAGGTTCTCTTCACCATTAAGAATAAGAAAGAGAGAAAATGCTGTGCATGACAGCCACCTACTCCAACT  
ACCCAACCCCTGTAACCAGGTACCTTCCAACAACGAGATGATTCTGCCCTCACTCAAGAGTCTCCCCCA  
CAAAGATTCCATTCTCCCTTACTTTTTATTTTTATTTTTTGCAAACAAAGGCCTCCTTTAGTACCT  
CCTTAGTTTATAACCCTTATCTTCCCAGCTCTTCCCTTCACTGATACCTCTGATTTCAAAGTTCTGAAG  
TCGGAAGACCACACAATTTCAGACTGTGAACAGAAATTCAGTCAGAAATTATTGGAGTTAGAAAGAATTT  
AGAGAAATTGTATTGAACTAGAAAGTCTCTTTGATTAGTGGTGGCCCTTAGAAAGTTCTAGGGCAGAG  
TCCCATGGTGTTTCATCTTTTCCATGATTGCTTGACCAAAAACCTTTCTTTCACAACATGAAAATATGC  
TAATCCACCACACATTTTGGATTCTGCTCTGTTTGCCTGAGGTGTTAGATCTCTAGCCAGGACTGTGAAG  
GGAAGGAACTTGAATCCTTCCTATTGAGCTATTAATGCAGAGTCAGTGAGATGAAGGGTCCACTCGGGG  
TCAAATCATGTTCAGTTACCAAGCAAAGGAGCAAGTAAGGGGAAACATCTCCTCATCTGGTTAGTGGAGC  
CACATTTCACCCACTGATCAAGCCAGACCTGAGCAATAGTCTAGATTTCTCCCTCCACATCTAATTGGTG  
ACAATGGTGATTGTACCACTGACAGGTCACACAAGTCCACACCCTCCTTCACAGCCTCACTGCTTCGGCT  
CTTGTTTATGCTCTTATCAGCATCTGTCACTAGGATCCATTTGTCTCCTGACTCATCTACTTCCTTTCAC  
TCCCCTGGGCCATCCTTCACATCATGCTAGAAGACTGTGTCTAACTTGCAGAACTTATTGTGTCAATCTC  
CTGGTTACGGCCCTCCATGGCTCCCCACCTGACATAGGAGGCCCTTACAATCTGGCTTCTGTCACTCA  
TAACTTGCTCCAGCCTTCATTCTTCAGTCTGATTTTATGGTTTTCTAGTTCCCAATACACCACACCAG  
TGTTTATGAAACCCTAGTCATTGGCCTACGAACCTTATGATTATTGACATATTCATGTACCACCTGTATT  
ATTTTTGCATAGTGTTTATTTTAATTGACTACATTTTAACTACAATAAAGTAATTTCAACTAAAA

>NM\_001010848.4 Homo sapiens neuregulin 3 (NRG3), transcript variant 1, mRNA

GGATTTGCATGCGGCCGCCGCGGCCGCTGCCTGCGCCCCGAGCCCGCCGCCGCCGCGAGCCCGCGCCCCG  
CGCCCGCGCCCGGCCCGCGCGGCCCCATGCCTCTGCCGCGGCCCTCGGGGGGGCGAAGGTGAAGACCGGC  
TCCTAGGATGAGTGAAGGGGCGGCCGCTGCCTCGCCACCTGGTGCCGCTTCGGCAGCCGCCGCTCGGCC  
GAGGAGGGCACCGCGCGGCTGCGGCGGCGGCAGCGCGGGCGGGGGCCCGACGGCGGCGGCGAAGGGG  
CGGCCGAGCCCCCGGGAGTTACGCTGTAGCGACTGCATCGTGTGGAACCGGCAGCAGACGTGGCTGTG  
CGTGGTACCTCTGTTCATCGGCTTCATCGGCCTGGGGCTCAGCCTCATGCTTCTCAAATGGATCGTGGTG  
GGCTCCGTCAAGGAGTACGTGCCCACCGACCTAGTGGACTCCAAGGGGATGGGCCAGGACCCCTTCTTCC  
TCTCCAAGCCCAGCTCTTTCCCAAGGCCATGGAGACCACCACCACTACCACTTCCACCACGTCCCCCGC  
CACCCCTCCGCCGGGGGTGCCGCCTCCTCCAGGACGCCCAACCGGATTAGCACTCGCCTGACCACCATC  
ACGCGGGCGCCCACTCGCTTCCCCGGGCACCGGGTGCCCATCCGGGCCAGCCCGCGCTCCACCACAGCAC  
GGAACACTGCGGCCCCCTGCGACGGTCCCGTCCACCACGGCCCCGTTCTTCAGTAGCAGCACGCTGGGCTC  
CCGACCCCCGGTGCCAGGAATCCAAGTACCCAGGCAATGCCCTCCTGGCCTACTGCGGCATACGCTACC  
TCCTCCTACCTTACGATTCTACTCCCTCCTGGACCCTGTCTCCCTTTCAGGATGCTGCCTCCTCTTCTT  
CCTCTTCTCCTCCTCCGCTACCACCACCACACCAGAACTAGCACCAGCCCCAAATTTCATACGACGAC  
ATATTCCACAGAGCGATCCGAGCACTTCAAACCCTGCCGAGACAAGGACCTTGCATACTGTCTCAATGAT  
GGCGAGTGCTTTGTGATCGAAACCCTGACCGGATCCCATAAACACTGTCGGTGCAAAGAAGGCTACCAAG  
GAGTCCGTTGTGATCAATTTCTGCCGAAAACCTGATTCCATCTTATCGGATCCAACAGACCACTTGGGGAT  
TGAATTCATGGAGAGTGAAGAAGTTTATCAAAGGCAGGTGCTGTCAATTTTCATGTATCATCTTTGGAATT  
GTCATCGTGGGCATGTTCTGTGCAGCATTCTACTTCAAAGCAAGAAACAAGCTAAACAAATCCAAGAGC  
AGCTGAAAGTGCCACAAAATGGTAAAAGCTACAGTCTCAAAGCATCCAGCACAATGGCAAAGTCAGAGAA  
CTTGGTGAAGAGCCATGTCCAGCTGCAAAATTATTCAAAGGTGGAAAGGCATCCTGTGACTGCATTGGAG  
AAAATGATGGAGTCAAGTTTTGTCGGCCCCAGTCATTCCCTGAGGTCCCTTCTCCTGACAGAGGAAGCC  
AGTCTGTCAAACACCACAGGAGTCTATCCTCTTGCTGCAGCCCAGGGCAAAGAAGTGGCATGCTCCATAG  
GAATGCCTTCAGAAGGACACCCCGTCACCCCGAAGTAGGCTAGGTGGAATTGTGGGACCAGCATATCAG  
CAACTCGAAGAATCAAGGATCCAGACCAGGATACGATACCTTGCCAAGGGTATTCATCCAGTGGTTTAA

AAACCCAACGAAATACATCAATAAATATGCAACTGCCTTCAAGAGAGACAAACCCCTATTTTAATAGCTT  
GGAGCAAAAGGACCTGGTGGGCTATTCATCCACAAGGGCCAGTTCTGTGCCCATCATCCCTTCAGTGGGT  
TTAGAGGAAACCTGCCTGCAAATGCCAGGGATTTCTGAAGTCAAAAGCATCAAATGGTGCAAAAACCTCT  
ATTCAGCTGACGTTGTCAATGTGAGTATTCCAGTCAGCGATTGTCTTATAGCAGAACAACAAGAAGTGAA  
AATATTGCTAGAAACTGTCCAGGAGCAGATCCGAATTCTGACTGATGCCAGACGGTCAGAAGACTACGAA  
CTGGCCAGCGTAGAAACCGAGGACAGTGCAAGCGAAAACACAGCCTTTCTCCCCCTGAGTCCCACAGCCA  
AATCAGAACGAGAGGCGCAATTTGTCTTAAGAAATGAAATACAAAGAGACTCTGCATTGACCAAGTGACT  
TGAGATGTAGGAATCTGTGCATTCTATGCTTTGCTCAACAGGAAAGAGAGGAAATCAAATACAAATTATT  
TATATGCATTAATTTAAGAGCATCTACTTAGAAGAAACCAAATAGTCTATCGCCCTCATATCATAGTGTT  
TTTTAACAAAATATTTTTTTAAGGGAAAGAAATGTTTCAGGAGGGATAAAGCTTACCATTAAAGCTTTTG  
GGTAGAATTCTGAATCCAATTCGTTTAGTCCCAACACTGTCTCTTTGGCTCTTAGAAGATGTGGGCAA  
TTCAGACCCTTGGCCCCACAGTGCCAGTGTCTCATTAAAAAACACTGGCAGTTACCTGGTTTCAAAAAGA  
GGAGAGCTGCATCCCGCAGGTGGATGCACCAGTGAGCAGGTGGCTCTTGCCATTTGGCTTGCCAGTCCCA  
AGCCCTAAATTTCTATTACCCAATAGCCTCATCACAGGTTATGTCATGTCGACACATGTAGTGTTTTCT  
ATTTGATTTTTGGAGAATGCCACAAAAGACTCTGCAATGGGAAGGAGGACAGGAGATAGAAGGAGAAACC  
GGGGGCAATCTTAATACTCTTGTGTGCCACCTTCCTCTGAGATTTGAATGCACAGATCTCAGCTGGAGG  
TATGAAATTATTACAGAAAAAGAGACAAAAAATCCTTATATCGTGCTACTAAAATCATGCTAATAGAAA  
TGTTTTTCCTTGAGATTGTTTAGAGGCTCTGGAGGAGCGTTTCTCAGTTTTTGTGTGCCTGTGTGCACAT  
GTGTGTGCGAGCGTGTGTGTGTGTGGACTTGCTCACGCGGGCACATATGCTGTAAGCACATGTGTTCAAT  
GTGCGTATGTGTGTGCATGTGTGCGCGTATTACGCTTGCTAAAATTTGTTCTGAAACATCAGGGAATCTA  
CTATTCAGAAAAATTATTTCCCTCTTAGATCTTTTCACTTTAAATTTTTCCATTAAGTATAAAGTTTCAGT  
TAGTTCTTAAATCAAGGTCACTTGTCATGGTGGGGTCGTATAAACTCTTGACACTGTCTAGACCATTTTC  
TGATGTGAATACTTTTGAGAGGATCAACTATTGGCTCATTAAATGATATCAGTATCATAAGGTGAGTTCAT  
CAAGGATGTGTGTTTATTTGAATCATGCCTACTTAAATTATTAATACAAGACAATTAACAAATTGACAG  
TTACCATTTGCTTTCATCATCCTCATTACCATTTATTTTATAGCAAGTCTGCTATGTGTGGACCAAGG

CTTCGGCTTCTGTGGTTAGTATGGGAAGAATAAATTGTTGAAATAAAAAATACCCAGACTATTTCAGTTCAC  
AAGAAGCCCCCAAAGAAGAACAGTAAATTGTGTTGTATGTTCAATTTGGAATAAAGCAATATTTTTACCACT  
GCTAAGGTGAACTGAAACCTCTCCTGAAGATTTGTCTGTTATTTACCCTCACTTCATGGGACATATGA  
GGAAATTAGTGTTACATATCCAGTCTTTTTCCAATTATTGGTGGTGTGAGTTGTTATGTTTACACTGT  
TTTAAATAAAAAGGCACCGTATTTGAAAGCA

>NM\_000918.4 Homo sapiens prolyl 4-hydroxylase subunit beta (P4HB), mRNA

GCTCTCGTCGCCCCGCTGTCCCGGCGGCGCCAACCGAAGCGCCCCGCCTGATCCGTGTCCGACATGCTG  
CGCCGCGCTCTGCTGTGCCTGGCCGTGGCCGCCCTGGTGCGCGCCGACGCCCCGAGGAGGAGGACCACG  
TCCTGGTGCTGCGGAAAAGCAACTTCGCGGAGGCGCTGGCGGCCACAAGTACCTGCTGGTGGAGTTCTA  
TGCCCCTTGGTGTGGCCACTGCAAGGCTCTGGCCCCTGAGTATGCCAAAGCCGCTGGGAAGCTGAAGGCA  
GAAGGTTCCGAGATCAGGTTGGCCAAGGTGGACGCCACGGAGGAGTCTGACCTGGCCCAGCAGTACGGCG  
TGCGCGGCTATCCCACCATCAAGTTCTTCAGGAATGGAGACACGGCTTCCCCAAGGAATATACAGCTGG  
CAGAGAGGCTGATGACATCGTGAAGTGGCTGAAGAAGCGCACGGGCCCCGGCTGCCACCACCCTGCCTGAC  
GGCGCAGCTGCAGAGTCCTTGGTGGAGTCCAGCGAGGTGGCTGTCATCGGCTTCTTCAAGGACGTGGAGT  
CGGACTCTGCCAAGCAGTTTTTGCAGGCAGCAGAGGCCATCGATGACATACCATTTGGGATCACTTCCAA  
CAGTGACGTGTTCTCCAAATACCAGCTCGACAAAGATGGGGTTGTCCTCTTAAGAAGTTTGATGAAGGC  
CGGAACAACCTTTGAAGGGGAGGTCACCAAGGAGAACCTGCTGGACTTTATCAAACACAACCAGCTGCCCC  
TTGTCATCGAGTTCACCGAGCAGACAGCCCCGAAGATTTTTGGAGGTGAAATCAAGACTCACATCCTGCT  
GTTCTTGCCCAAGAGTGTGTCTGACTATGACGGCAAACCTGAGCAACTTCAAACAGCAGCCGAGAGCTTC  
AAGGGCAAGATCCTGTTTCATCTTCATCGACAGCGACCACACCGACAACCAGCGCATCCTCGAGTTCTTG  
GCCTGAAGAAGGAAGAGTGCCCGGCCGTGCGCCTCATCACCTGGAGGAGGAGATGACCAAGTACAAGCC  
CGAATCGGAGGAGCTGACGGCAGAGAGGATCACAGAGTTCTGCCACCGCTTCTGGAGGGCAAAATCAAG  
CCCCACCTGATGAGCCAGGAGCTGCCGGAGGACTGGGACAAGCAGCCTGTCAAGGTGCTTGTTGGGAAGA

ACTTTGAAGACGTGGCTTTTGATGAGAAAAAAACGTCTTTGTGGAGTTCTATGCCCCATGGTGTGGTCA  
CTGCAAACAGTTGGCTCCCATTTGGGATAAACTGGGAGAGACGTACAAGGACCATGAGAACATCGTCATC  
GCCAAGATGGACTCGACTGCCAACGAGGTGGAGGCCGTCAAAGTGACAGCTTCCCCACACTCAAGTTCT  
TTCCTGCCAGTGCCGACAGGACGGTCATTGATTACAACGGGGAACGCACGCTGGATGGTTTTAAGAAATT  
CCTGGAGAGCGGTGGCCAGGATGGGGCAGGGGATGATGACGATCTCGAGGACCTGGAAGAAGCAGAGGAG  
CCAGACATGGAGGAAGACGATGATCAGAAAGCTGTGAAAGATGAACTGTAATACGCAAAGCCAGACCCGG  
GCGCTGCCGAGACCCCTCGGGGGCTGCACCCCAGCAGCAGCGCACGCCTCCGAAGCCTGCGGCCTCGCT  
TGAAGGAGGGCGTCGCCGAAACCCAGGGAACCTCTCTGAAGTGACACCTACCCCTACACACCGTCCGT  
TCACCCCGTCTCTTCTTCTGCTTTTCGGTTTTTGAAAGGGATCCATCTCCAGGCAGCCCACCCTGGT  
GGGGCTTGTTTCCTGAAACCATGATGTACTTTTTCATACATGAGTCTGTCCAGAGTGCTTGCTACCGTGT  
TCGGAGTCTCGCTGCCTCCCTCCCGCGGGAGGTTTCTCCTCTTTTGAATAATCCGTCTGTGGGATTTTT  
AGACATTTTTCGACATCAGGGTATTTGTTCCACCTTGGCCAGGCCTCCTCGGAGAAGCTTGTCCTCCGTG  
TGGGAGGGACGGAGCCGGACTGGACATGGTCACTCAGTACCGCCTGCAGTGTGCCATGACTGATCATGG  
CTCTTGCATTTTTGGGTAAATGGAGACTTCCGGATCCTGTCAGGGTGTCCCCCATGCCTGGAAGAGGAGC  
TGGTGGCTGCCAGCCCTGGGGCCCGGCACAGGCCTGGGCCTTCCCCTTCCCTCAAGCCAGGGCTCCTCCT  
CCTGTCGTGGGCTCATTGTGACCACTGGCCTCTCTACAGCACGGCCTGTGGCCTGTTCAAGGCAGAACCA  
CGACCCTTGACTCCCGGGTGGGGAGGTGGCCAAGGATGCTGGAGCTGAATCAGACGCTGACAGTTCTTCA  
GGCATTTCTATTTACAATCGAATTGAACACATTGGCCAAATAAAGTTGAAATTTTA

>NM\_001618.4 Homo sapiens poly(ADP-ribose) polymerase 1 (PARP1), mRNA

AGCAATCTATCAGGGAACGGCGGTGGCCGGTGCGGCGTGTTTCGGTGGCGGCTCTGGCCGCTCAGGCGCCT  
GCGGCTGGGTGAGCGCACGCGAGGCGGCGAGGCGGCAGCGTGTTTCTAGGTCGTGGCGTCGGGCTTCCGG  
AGCTTTGGCGGCAGCTAGGGGAGGATGGCGGAGTCTTCGGATAAGCTCTATCGAGTCGAGTACGCCAAGA  
GCGGGCGCGCCTCTTGCAAGAAATGCAGCGAGAGCATCCCCAAGGACTCGCTCCGGATGGCCATCATGGT

GCAGTCGCCCATGTTTGATGGAAAAGTCCCACACTGGTACCACTTCTCCTGCTTCTGGAAGGTGGGCCAC  
TCCATCCGGCACCTGACGTTGAGGTGGATGGGTTCTCTGAGCTTCGGTGGGATGACCAGCAGAAAAGTCA  
AGAAGACAGCGGAAGCTGGAGGAGTGACAGGCCAAAGGCCAGGATGGAATTGGTAGCAAGGCAGAGAAGAC  
TCTGGGTGACTTTGCAGCAGAGTATGCCAAGTCCAACAGAAGTACGTGCAAGGGGTGTATGGAGAAGATA  
GAAAAGGGCCAGGTGCGCCTGTCCAAGAAGATGGTGGACCCGGAGAAGCCACAGCTAGGCATGATTGACC  
GCTGGTACCATCCAGGCTGCTTTGTCAAGAACAGGGAGGAGCTGGGTTTCCGGCCCCGAGTACAGTGCGAG  
TCAGCTCAAGGGCTTCAGCCTCCTTGCTACAGAGGATAAAGAAGCCCTGAAGAAGCAGCTCCCAGGAGTC  
AAGAGTGAAGGAAAGAGAAAAGGCGATGAGGTGGATGGAGTGGATGAAGTGGCGAAGAAGAAATCTAAAA  
AAGAAAAAGACAAGGATAGTAAGCTTGAAAAAGCCCTAAAGGCTCAGAACGACCTGATCTGGAACATCAA  
GGACGAGCTAAAGAAAAGTGTGTTCAACTAATGACCTGAAGGAGCTACTCATCTTCAACAAGCAGCAAGTG  
CCTTCTGGGGAGTCGGCGATCTTGGACCGAGTAGCTGATGGCATGGTGTTCGGTGCCCTCCTTCCCTGCG  
AGGAATGCTCGGGTCAGCTGGTCTTCAAGAGCGATGCCTATTACTGCACTGGGGACGTCACTGCCTGGAC  
CAAGTGTATGGTCAAGACACAGACACCCAAACCGGAAGGAGTGGGTAACCCCAAAGGAATCCGAGAAAATC  
TCTTACCTCAAGAAATTGAAGGTTAAAAAACAGGACCGTATATCCCCCCAGAAACCAGCGCCTCCGTGG  
CGGCCACGCCTCCGCCCTCCACAGCCTCGGCTCCTGCTGCTGTGAACTCCTCTGCTTCAGCAGATAAGCC  
ATTATCCAACATGAAGATCCTGACTCTCGGGAAGCTGTCCCGGAACAAGGATGAAGTGAAGGCCATGATT  
GAGAACTCGGGGGGAAGTTGACGGGGACGGCCAACAAGGCTTCCCTGTGCATCAGCACCAAAAAGGAGG  
TGGAAGATGAATAAGAAGATGGAGGAAGTAAAGGAAGCCAACATCCGAGTTGTGTCTGAGGACTTCCT  
CCAGGACGTCTCCGCCTCCACCAAGAGCCTTCAGGAGTTGTTCTTAGCGCACATCTTGTCCCCTTGGGGG  
GCAGAGGTGAAGGCAGAGCCTGTTGAAGTTGTGGCCCCAAGAGGGAAGTCAGGGGCTGCGCTCTCCAAAA  
AAAGCAAGGGCCAGGTCAAGGAGGAAGGTATCAACAAATCTGAAAAGAGAATGAAATTAAGTCTTAAAGG  
AGGAGCAGCTGTGGATCCTGATTCTGGACTGGAACACTCTGCGCATGTCCTGGAGAAAGGTGGGAAGGTC  
TTCAGTGCCACCCTTGGCCTGGTGGACATCGTTAAAGGAACCAACTCCTACTACAAGCTGCAGCTTCTGG  
AGGACGACAAGGAAAACAGGTATTGGATATTCAGGTCCTGGGGCCGTGTGGGTACGGTGATCGGTAGCAA  
CAAAGTGAACAGATGCCGTCCAAGGAGGATGCCATTGAGCACTTCATGAAATTATATGAAGAAAAAAC

GGGAACGCTTGGCACTCCAAAAATTTACGAAGTATCCCAAAAAGTTCTACCCCCTGGAGATTGACTATG  
GCCAGGATGAAGAGGCAGTGAAGAAGCTGACAGTAAATCCTGGCACCAAGTCCAAGCTCCCCAAGCCAGT  
TCAGGACCTCATCAAGATGATCTTTGATGTGGAAAGTATGAAGAAAGCCATGGTGGAGTATGAGATCGAC  
CTTCAGAAGATGCCCTTGGGGAAGCTGAGCAAAAAGGCAGATCCAGGCCGCATACTCCATCCTCAGTGAGG  
TCCAGCAGGCGGTGTCTCAGGGCAGCAGCGACTCTCAGATCCTGGATCTCTCAAATCGCTTTTACACCCT  
GATCCCCACGACTTTGGGATGAAGAAGCCTCCGCTCCTGAACAATGCAGACAGTGTGCAGGCCAAGGTG  
GAAATGCTTGACAACCTGCTGGACATCGAGGTGGCTACAGTCTGCTCAGGGGAGGGTCTGATGATAGCA  
GCAAGGATCCCATCGATGTCAACTATGAGAAGCTCAAAACTGACATTAAGGTGGTTGACAGAGATTCTGA  
AGAAGCCGAGATCATCAGGAAGTATGTTAAGAACACTCATGCAACCACACACAATGCGTATGACTTGGAA  
GTCATCGATATCTTTAAGATAGAGCGTGAAGGCGAATGCCAGCGTTACAAGCCCTTTAAGCAGCTTCATA  
ACCGAAGATTGCTGTGGCACGGGTCCAGGACCACCAACTTTGCTGGGATCCTGTCCCAGGGTCTTCGGAT  
AGCCCCGCCTGAAGCGCCCGTGACAGGCTACATGTTTGGTAAAGGGATCTATTTGCTGACATGGTCTCC  
AAGAGTGCCAACTACTGCCATACGTCTCAGGGAGACCCAATAGGCTTAATCCTGTTGGGAGAAGTTGCCC  
TTGGAAACATGTATGAACTGAAGCACGCTTCACATATCAGCAAGTTACCCAAGGGCAAGCACAGTGTCAA  
AGGTTTGGGCAAAACTACCCCTGATCCTTCAGCTAACATTAGTCTGGATGGTGTAGACGTTCTCTTGGG  
ACCGGGATTTTCATCTGGTGTGAATGACACCTCTCTACTATATAACGAGTACATTGTCTATGATATTGCTC  
AGGTAAATCTGAAGTATCTGCTGAAACTGAAATTCAATTTAAGACCTCCCTGTGGTAATTGGGAGAGGT  
AGCCGAGTCACACCCGGTGGCTCTGGTATGAATTCACCCGAAGCGCTTCTGCACCAACTCACCTGGCCGC  
TAAGTTGCTGATGGGTAGTACCTGTACTAAACCACCTCAGAAAGGATTTTACAGAAACGTGTTAAAGGTT  
TTCTCTAACTTCTCAAGTCCCTTGTTTTGTGTTGTGTCTGTGGGGAGGGGTTGTTTTGGGGTTGTTTTG  
TTTTTTCTTGCCAGGTAGATAAAACTGACATAGAGAAAAGGCTGGAGAGAGATTCTGTTGCATAGACTAG  
TCCTATGGAAAAAACCAAGCTTCGTTAGAATGTCTGCCTTACTGGTTTCCCAGGGAAGGAAAAATACAC  
TTCCACCCTTTTTTCTAAGTGTTTCGTCTTTAGTTTTGATTTTGAAAGATGTTAAGCATTTATTTTTAGT  
TAAAAATAAAAACTAATTCATACTATTTAGATTTTCTTTTTATCTTGCACTTATTGTCCCCTTTTTAG  
TTTTTTTTGTTTGCCTCTTGTTGGTGAGGGGTGTGGGAAGACCAAAGGAAGGAACGCTAACAATTTCTCAT

ACTTAGAAACAAAAAGAGCTTCTCTCCAGGAATACTGAACATGGGAGCTCTTGAAATATGTAGTATT  
AAAAGTTGCATTTGAAATTCTTGACTTTCTTATGGGCACTTTTGTCTTCCAAATTAAGCTCTACCACAA  
ATATACTTACCCAAGGGCTAATAGTAATACTCGATTAAAAATGCAGATGCCTTCTCTA

>NM\_003768.5 Homo sapiens proliferation and apoptosis adaptor protein 15 (PEA15), transcript variant 2, mRNA

GGCTCCGCGGGCGGAAGAGGCGGCGGCGGCAGAAAGCGGCGGCGGCGGGAGCCGAGGAGGAG  
GTTCCGGACGCTGCTTAGGAACCGGGGACTCAGGAGTGCCCGCGCCCTGAGCGCTCAGCTCCAGAGGCGT  
CATGGCTGAGTACGGGACCTCCTGCAAGACCTGACCAACAACATCACCTTGAAGATCTAGAACAGCTC  
AAGTCGGCCTGCAAGGAAGACATCCCCAGCGAAAAGAGTGAGGAGATCACTACTGGCAGTGCCTGGTTTA  
GCTTCCTGGAGAGCCACAACAAGCTGGACAAAGACAACCTCTCCTACATTGAGCACATCTTTGAGATCTC  
CCGCCGTCCTGACCTACTCACTATGGTGGTTGACTACAGAACCCGTGTGCTGAAGATCTCTGAGGAGGAT  
GAGCTGGACACCAAGCTAACCCGTATCCCCAGTGCCAAGAAGTACAAAGACATTATCCGGCAGCCCTCTG  
AGGAAGAGATCATCAAATTGGCTCCCCACCGAAGAAGGCCTGAGCAAGGGGGAGGAAGAGGAGGAAGGT  
TGGACCTTCATCAGACCACTCCCTTCCCCATCCTCCAGGAGAGGGGGCAAGGGCAACCCACCATCTACC  
CACTACTAACCTGGTCCTAACCCCTTACTGTGCGCGTGTGTGTGCGTGTGCGCACGCTCTGGCTGTTT  
GTCTATATGTCTAGCTCATCTAGTTCCTCTTCTTAAGGGGATGGGGGTCAGGGGCTAGGGGAGGGGGCTG  
AGTTTCCCCACTTTAGGAGGAGGTGGGGGCTATTTCTATGCAAATAGAAATCAGCACATTCTCCTACTT  
CCCTTTCCTCCACTCCCCCATATCTTTAAAGTGTTGAAGCAGAAAGGACCTGCATTTTCCTACATTGAG  
GAGCTGACATAGGGGTAAGGTATGGGAGAGGTAGGTGGATCCAGGGAAAAGCAGTGGGGACGGAAGGCAA  
AGAGACCACTCAACCCCACTGGAAGGGGCAAAGAAAAGCCAGAGTTCCATGTTTGTACTCCTGTGCTG  
GACTGTTTCCTGAGTACCAGCAGGTCCCTTTTTGTCTCTCATGGGCCTAGCATAGGTATGAGCCAGGGAT  
CCTTTCCTGGTCCCTAAGATCAAACCCCATGGAGCAGCCAGCGTTAGATGCCCCACCCACCTGTACTCT  
GGAGAGACTGTGCTGGGAACATGTACCACTGAGCCTGAGATGGGGATGAGGGCAGAGAGAGGGGAGCCCC

CTCTTCCACTCAGTTGTTCTACTCAGACTGTTGCACTCTAAACCTAGGGAGGTTGAAGAATGAGACCTT  
TAGGTTTTAACACGAATCCTGACACCACCATCTATAGGGTCCCAACTTGTTATTGTAGGCAACCTTCCC  
TCTCTCCTTGGTGAAGAACATCCCAAGCCAGAAAGAAGTTAACTACAGTGTTTTCTTTGCACCGATCCC  
CACCCCAATTCAATCCCGGAAGGGACTTACTTAGGAAACCCTTCTTTACTAGATATCCTGGCCCCCTGGG  
CTTGTGAACACCTCCTAGCCACATCACTACAGTACAGTGAGTGACCCCAGCCTCCTGCCTACCCCAAGAT  
GCCCCCTCCCCACCCTGACCGTGCTAACTGTGTGTACATATATATTCTACATATATGTATATTAATAACTGC  
ACTGCCATGTCTGCCCTTTTTTGTGGTGTCTAGCATTAACTTATTGTCTAGGCCAGAGCGGGGGTGGGAG  
GGGAATGCCACAGTGAAGGGAGTGGCAGAATCAAATTGCTACATAGTCCAAACAAAAAGAAGGCTTTTT  
CAAAAAACATTAAATTCACATGCAGTCTCAGAGACTATTTAGACAAAGTTCAAGTTAGGAGCTTTTAGGA  
TGTGGGAGTAAACTTTAATGGGAGGGGAGGGCTGGCTGCTGGAAGAAGGAAGAAGCCAGACTGGTTAGA  
CAGTACTCTTAACTCCTAGCCCAGCCTAGCGTGCCCTGCCCCTCTGGCCACTGCTGCAGACACCTGCCTT  
AACACACACACCTCTAGGACTCCACAGTTTTGCCTTAAAGGACCTTCCAAGTCTCCCTTCCCTGTCTG  
GCTTCTCCCTTAAGAAGAGAGAGATACTTGTAGAATTGGGTGGGGGAATGAGCATGAACTGTCCTTCCA  
TTTGGGATATGTTACATTAGAGTGAGAGAGAGAATAAGGAGCCTTCTTATGGAAGAAATGGGAGAAGAG  
AGACAGGGTTCTTTTCAGCAGAGTCTAGTAGTTTCTCTGTAAGGCAAATAATCTAAAAAGACTAACCTG  
CCCACCCACTCCTTATATTGCTGTGAGATTGCCCTATCTTGTGCTCTTCTGTCTGCAGTGTGCACGGCC  
TTGTTCTAACCCGGAATAAAGGTGATTGATTGTATTGCAA

>NM\_014389.3 Homo sapiens proline, glutamate and leucine rich protein 1 (PELP1), transcript variant 1, mRNA

ACGCCACCACTGGAACCCGGGGGAAGATGGCGGCAGCCGTTCTGAGTGGGCCCTCTGCGGGCTCCGCGGC  
TGGGGTTCTGGCGGGACCGGGGGTCTCTCGGCAGTGAGCTCGGGCCCGCGGCTCCGCCTGCTGCTGCTG  
GAGAGTGTCTTCTGGTTTGCTGCAACCTCGAACGGGGTCTGCCGTTGCTCCGGTGCATCCCCAAACCGCT  
CGGCCCCACATTGCCCCGGGCTCATGTGCCTATTGCGGCTGCATGGGTCCGGTGGGCGGGGCCAGAACCT

TTCAGCTCTTGGGGCATTGGTGAGTCTCAGTAATGCACGTCTCAGTTCCATCAAACTCGGTTTGAGGGC  
CTGTGTCTGCTGTCCCTGCTGGTAGGGGAGAGCCCCACAGAGCTATTCCAGCAGCACTGTGTGTCTTGGC  
TTCGGAGCATTACAGCAGGTGTTACAGACCCAGGACCCGCCTGCCACAATGGAGCTGGCCGTGGCTGTCCT  
GAGGGACCTCCTCCGATATGCAGCCCAGCTGCCTGCACTGTTCCGGGACATCTCCATGAACCACCTCCCT  
GGCCTTCTCACCTCCCTGCTGGGCCTCAGGCCAGAGTGTGAGCAGTCAGCATTGGAAGGAATGAAGGCTT  
GTATGACCTATTTCCCTCGGGCTTGTGGTTCTCTCAAAGGCAAGCTGGCCTCATTTTTTCTGTCTAGGGT  
GGATGCCTTGAGCCCTCAGCTCCAACAGTTGGCCTGTGAGTGTTATCCCGGCTGCCCTCTTAGGGGCT  
GGCTTTTCCAAGGCCTGAAGCACACCGAGAGCTGGGAGCAGGAGCTACACAGTCTGCTGGCCTCACTGC  
ACACCCTGCTGGGGGCCCTGTACGAGGGAGCAGAGACTGCTCCTGTGCAGAATGAAGGCCCTGGGGTGGA  
GATGCTGCTGTCCTCAGAAGATGGTGATGCCCATGTCTTCTCCAGCTTCGGCAGAGGTTTTCGGGACTG  
GCCCCTGCTAGGGCTCATGCTCAGCTCTGAGTTTGGAGCTCCCGTGTCCGTCCCTGTGCAGGAAATCC  
TGGATTTCATCTGCCGGACCCTCAGCGTCAGTAGCAAGAATATTAGCTTGCATGGAGATGGTCCCCTGCG  
GCTGCTGCTGCTGCCCTCTATCCACCTTGAGGCCTTGACCTGCTGTCTGCACTCATCCTCGCGTGTGA  
AGCCGGCTCTTGCGCTTTGGGATCCTGATCGGCCGCCTGCTTCCCCAGGTCCTCAATTCCTGGAGCATCG  
GTAGAGATTCCCTCTCTCCAGGCCAGGAGAGGCCTTACAGCACGGTTCGGACCAAGGTGTATGCGATATT  
AGAGCTGTGGGTGCAGGTTTGTGGGGCCTCGGCGGGAATGCTTCAGGGAGGAGCCTCTGGAGAGGCCCTG  
CTACCCACCTGCTCAGCGACATCTCCCCGCCAGCTGATGCCCTTAAGCTGCGTAGCCCCGCGGGGGAGCC  
CTGATGGGAGTTTGCAGACTGGGAAGCCTAGCGCCCCAAGAAGCTAAAGCTGGATGTGGGGGAAGCTAT  
GGCCCCGCCAAGCCACCGGAAAGGGGATAGCAATGCCAACAGCGACGTGTGTGCGGCTGCACTCAGAGGC  
CTCAGCCGGACCATCCTCATGTGTGGGCCTCTCATCAAGGAGGAGACTCACAGGAGACTGCATGACCTGG  
TCCTCCCCCTGGTCATGGGTGTACAGCAGGGTGAGGTCCTAGGCAGCTCCCCGTACACGAGCTCCCGTG  
CCGCCGTGAACTCTACTGCCTGCTGCTGGCGCTGCTGCTGGCCCCGTCTCTCGCTGCCACCTCCTCTT  
GCCTGTGCCCTGCAAGCCTTCTCCCTCGGCCAGCGAGAAGATAGCCTTGAGGTCTCCTCTTTCTGCTCAG  
AAGCACTGGTGACCTGTGCTGCTCTGACCCACCCCGGGTTCTCCCTGCAGCCCATGGGCCCCACCTG  
CCCCACACCTGCTCCAGTTCCCCCTCTGAGGCCCCATCGCCCTTCAGGGCCCCACCGTTCCATCCTCCG

GGCCCCATGCCCTCAGTGGGCTCCATGCCCTCAGCAGGCCCCATGCCTTCAGCAGGCCCCATGCCCTCAG  
CAGGCCCTGTGCCCTCGGCACGCCCTGGACCTCCCACCACAGCCAACCACCTAGGCCTTTCTGTCCCAGG  
CCTAGTGTCTGTCCCTCCCCGGCTTCTTCCTGGCCCTGAGAACCACCGGGCAGGCTCAAATGAGGACCCC  
ATCCTTGCCCCTAGTGGGACTCCCCACCTACTATACCCCAGATGAACTTTTGGGGGGAGAGTGCCCA  
GACCAGCCTTTGTCCACTATGACAAGGAGGAGGCATCTGATGTGGAGATCTCCTTGAAAGTGACTCTGA  
TGACAGCGTGGTGATCGTGCCCGAGGGGCTTCCCCCCTGCCACCCCCACCACCTCAGGTGCCACACCA  
CCCCCTATAGCCCCCACTGGGCCACCAACAGCCTCCCCTCCTGTGCCAGCGAAGGAGGAGCCTGAAGAAC  
TTCCTGCAGCCCCAGGGCCTCTCCCGCCACCCCCACCTCCGCCGCCGCTGTTCTGGTCCTGTGACGCT  
CCCTCCACCCCAGTTGGTCCCTGAAGGGACTCCTGGTGGGGGAGGACCCCCAGCCCTGGAAGAGGATTTG  
ACAGTTATTAATATCAACAGCAGTGATGAAGAGGAGGAGGAAGAGGAAGAAGAGGAAGAAGAAGAAGAGG  
AAGAAGAGGAAGAGGAGGAAGACTTTGAGGAAGAGGAAGAGGATGAAGAGGAATATTTTGAAGAGGAAGA  
AGAGGAGGAAGAAGAGTTTGAGGAAGAATTTGAGGAAGAAGAAGGTGAGTTAGAGGAAGAAGAAGAAGAG  
GAGGATGAGGAGGAGGAAGAAGAAGCTGGAAGAGGTGGAAGACCTGGAGTTTGGCACAGCAGGAGGGGAGG  
TAGAAGAAGGTGCACCTCCACCCCCAACCTGCCTCCAGCTCTGCCTCCCCCTGAGTCTCCCCAAAGGT  
GCAGCCAGAACCCGAACCTGAACCCGGGCTGCTTTTGAAAGTGGAGGAGCCAGGGACGGAGGAGGAGCGT  
GGGGCTGACACAGCTCCCACCCTGGCCCCTGAAGCGCTCCCCTCCCAGGGAGAGGTGGAGAGGGAAGGGG  
AAAGCCCTGCGGCAGGGCCCCCTCCCCAGGAGCTTGTTGAAGAAGAGCCCTCTGCTCCCCCAACCCTGTT  
GGAAGAGGAGACTGAGGATGGGAGTGACAAGGTGCAGCCCCCACCAGAGACACCTGCAGAAGAAGAGATG  
GAGACAGAGACAGAGGCCGAAGCTCTCCAGGAAAAGGAGCAGGATGACACAGCTGCCATGCTGGCCGACT  
TCATCGATTGTCCCCTGATGATGAGAAGCCACCACCTCCCACAGAGCCTGACTCCTAGCCATCTTCTGC  
ACCCCACTCTTTGTTTCCAATAAAGTTATGTCCTTAGATAGCGACTGCTGCTTCTGCCTTTTGCCACACC  
TGGGTCCCCAGCCAGAAGCTCAAGTGTCTGCTGGGCTTTTCAGGGTGTCCATAGTATTTCCCAGATGTCT  
CCATAGCTGTCCTCTTTTTGACGATCCAGAGAGGAACAAGTACATTGGTGTAATGGACTGTCCCATCAC  
TCAGCACGATGGTGTGAGAATTGTAGGATTCTGGCTGGATGCTAAACGTGCAGAATTGTGTGTAGGGTTA  
AGAATGAGGAGTTATAGAGACACAGCCCTGCTTTCGTGTTGTATTGCGGGTGGGAAATGTGTGGAGAAT

GCATCCTAGTGAGTGGACCTGTGTCAACACCCACATGCCCACACGCATGCGTGCTCAGCCCCTTGGTCTG  
AAAGGGCAGGCTGAGTGATTGCTCAGTCTATGGAAGTTTAGGAAATTAGGAAAAGGTGTGGAGCAGTTTA  
GTCATTGAATTCTGGGAAATTTGGACCTTACCCCAAGATGAAAGGGTGTCCGTAGTGGGTACGTTGGGAA  
TGACCTCTGTTTTGGGGCTAGTCCTCCTAATGACAGTTCCCCTCACAGCTCCCTGGCAGGAGTTTGATAA  
GCTCACCCAGGCCTTCCTGCTCACTCTTGAGGTGTGGATATTTCCACCCAGTGTCTTTTCTTTCTTT  
TTTTTTTTGAGATGGACTCCTGCTCTGTGCCCAGGCTGGAGTGCAGTGGCATGGTCTCAGCTCACTGCA  
ACCTCTGCCTCCCAGGTTCAAGCAATTCTCTGCCTCAGCCTCCTGAGTAGCTGGGATTACAGGCGCCTGC  
CACTGCCTGGCTAATTTTTGTATTTTTAGTAGAGGTGGGGTTTCACCATGTTGGCCAGGCTGGTCTTGAA  
CTCCTGAGCTCATGGTCCACCTGCCTTGGACTCCCAAAGTGCTGGGATCACAAGCATGAGACACCGCACC  
TGACTGTCCCAGTGTCTTTTCTTTAAGCACTAATCCTATTCTAGGCCTTGCTGGGATGGACGTGTGAGGA  
TGAACCGAGAGATGTGTCTGTGAGAGGGTACCAAGATTGGTGGGCTTGAAGTAGGGGCCCCGTGGTTTTT  
TTTGCTCAGTCAGTTGAATCATGAACGTAAGTAAAGTGCCTTCGCAATGCAGAAGAGGGAGTCATTTCTC  
CCAACATGTATCCTGAAGAGCCCTTTGAGGAGGTGGCATTGAGCTAATTTTTGGAACTTCAGTAGGAT  
TTTAAAAAGTTACCCCTCAACTTGTTTTCGAAATAAACAGAAAAGTGAGAACAGTATAATAGATAACCTT  
TGCCTAGATTTGCCAATTAACATTTAGTCATGTTAACTCTTATCCCTATAAACTGCGTATCTACATGTAG  
ACATGTATCTATATTACCCCATATATCTGTCTAATCTATACATCTGTAGTTATACACATTTCTTTTTTC  
ATGGGACCACGTGAAAGTAAGCTGTAGACACCGTGGCCCTTCCCATCCCAGATTCTTTAACATGAATTAT  
CTTCTAAGATAAGAATGTTTTCTGCACAATCCTGATACCATTATCAAACCTAAGAAAAATAACAGTAAT  
CCAGTGATAATTGTGATATTAAAAATTTTCTATTAATTCCTAAA

>NM\_004565.3 Homo sapiens peroxisomal biogenesis factor 14 (PEX14), mRNA

AGTCAGGCCTCAGAAAGATGGCGTCTCGGAGCAGGCAGAGCAGCCGAGCCAGCCAAGCTCTACTCCAGG  
AAGTGAAAATGTGCTGCCTCGAGAGCCGCTGATTGCCACGGCAGTGAAGTTTCTACAGAATTCCCGGGTC

CGCCAGAGCCCACCTTGCAACCAGGAGAGCATTCTAAAGAAGAAAGGGCTGACAGATGAAGAGATTGATA  
TGGCCTTCCAGCAGTCGGGCACTGCTGCCGATGAGCCTTCGTCTTGGGCCCAGCCACACAGGTGGTTCC  
TGTCCAGCCCCCTCACCTCATATCTCAGCCATACAGTCCCGCAGGCTCCCGATGGCGAGATTACGGCGCC  
CTGGCCATCATCATGGCAGGCATTGCATTTGGCTTTCACCAGCTCTACAAGAAATACCTGCTCCCCCTCA  
TCCTGGGCGGCCGAGAGGACAGAAAGCAGCTGGAGAGGATGGAGGCCGGTCTCTCTGAGCTGAGTGGCAG  
CGTGGCCCAGACAGTGACTCAGTTACAGACGACCCTCGCTCCGTCCAGGAGCTGCTGATTACAGCAGCAG  
CAGAAGATCCAGGAGCTTGCCACGAGCTGGCCGCTGCCAAGGCCACCACATCCACCAACTGGATCCTGG  
AGTCCCAGAATATCAACGAACTCAAGTCCGAAATTAACCTTGAAAGGGCTTCTTTAAATCGGAGGCA  
GTTCCCTCCATCCCCATCAGCCCCGAAGATCCCCTCCTGGCAGATCCCAGTCAAGTCACCGTCACCCTCC  
AGCCCTGCGGCCGTGAACCACCACAGCAGCAGCGACATCTCACCTGTCAGCAACGAGTCCACGTCGTCTCT  
CGCCTGGGAAGGAGGGCCACAGCCCCGAGGGCTCCACGGTCACCTACCACTTGCTGGGCCCCCAGGAGGA  
AGGCGAGGGGGTGGTGGACGTCAAGGGCCAGGTGCGGATGGAGGTGCAAGGCGAGGAGGAGAAGAGGGAG  
GACAAGGAGGACGAGGAGGATGAGGAGGATGATGATGTGAGCCATGTGGACGAGGAGGACTGCCTGGGGG  
TGCAGAGGGAGGACCGCCGGGGCGGGGATGGGCAGATCAACGAGCAGGTGGAGAAGCTGCGGCGGCCCCGA  
GGGCGCCAGCAACGAGAGTGAGCGGGACTAGGGCTGCGCCTGCTGCCTCCAGCCCTGAGGATGGCATCTA  
GTGTGCCCCTGCGTGGCCATACCCTGCCTCCCTCTCTGGCCCTGGGAGGGCAGCTTGGAGCCCAGGTAGG  
GGGCAGAGCTGTCTCAGCTGCACTGCGGCCTGGTGGCAGTGTGGGGAGTCACACTTCTGTCCACCTGGC  
CTCCTCTCGCCTGGCCGCCAGCCCCAGCCCCAGCCCCAGCCCCAGGCCAGCTGCCTTTGGCTTTGATCT  
CAAGTCAGGCTGAAGGCAGCGAAGCCTCGGGGCCAAGCCCCTCCCCAGCCCCCTCTCCCGACAGACGC  
CTTGCCCAGGGTGTGTTTGCTGAGTGTCTTGACTACCGTGACACCACGCATGGCCAGAGCTAGCGTCCCT  
ACTGCCTCCCGACTCCTCAGTGAGGAGGAGCTGCGGTCCCTCTGGTGTCTGCCATCCCCCTCCCTCCCT  
GGGCCCCGGCCCTGGACCCGTCAGGTGCCTGTCCCCAGCCCCAACCCCACTCATGCCCCGTGTCCTCCCA  
GACAAATGAAACCACGCTGCGCTTCCGATGCCCCGCTTGCCGTGTAATGGTTCAGCTAATCCCATGGCG  
AGATGGGGGCTCACTCCGGAGGAGGAGCCAGGCAGCAGGGCCTTCCTGACCAACAGCCAGCTCTGTCCTT  
CCCCCAGGAAACACATGTTCAATTTGTGTGATCATGTATAGACCTCAGAACGGAAGATAGGACTGTATAT

AATTGTAATAAATACCAGTTGCCACTATTTAA

>NM\_003630.3 Homo sapiens peroxisomal biogenesis factor 3 (PEX3), mRNA

AGTGAGCGGCGGGCTGCGCGGCGGCAGCGGCAGAAAGCGTAGCTGCTTTGCTGTAGTCCACGCCCCCT  
TGCCGCTCCGGTGACAGTCTCTGCGGAAAGTCACGTTTGTGATTCGGGAGAGCACAGAACGGGACGACG  
GCGCTCTTGCTGGGTCATCTGGGCCAGGTGACGAAGAAACAGTTTCCTGGTGAAGCAGTCCCTCACCCCT  
AGTCAGCCCACACCCCTAGGGCCTAAAGATGCTGAGGTCTGTATGGAATTTTCTGAAACGCCACAAAAAG  
AAATGCATCTTCCTGGGCACGGTCCTTGAGGAGTATATATTCTGGGGAAATATGGACAGAAGAAAATCA  
GAGAAATACAGGAAAGGGAGGCTGCAGAATACATTGCCCAAGCACGACGACAATATCATTTTGAAAGTAA  
CCAGAGGACTTGCAATATGACAGTGCTGTCCATGCTTCCAACACTGAGAGAGGCCTTAATGCAGCAACTG  
AATCCGAGAGCCTCACAGCTCTGCTAAAAAACAGGCCTTCAAACAAGCTAGAAATATGGGAGGATCTGA  
AGATAATAAGTTTCACAAGAAGTACTGTGGCTGTATACAGTACCTGTATGCTGGTTGTTCTTTGCGGGT  
CCAGTTAAACATAATTGGTGGATATATTTACCTGGATAATGCAGCAGTTGGCAAAAATGGCACTACAATT  
CTTGCTCCCCCAGATGTCCAACAGCAGTATTTATCAAGTATTCAGCACCTACTTGGAGATGGCCTGACAG  
AATTGATCACTGTCATTAAACAAGCTGTGCAGAAGGTTTTAGGAAGTGTTTCTCTTAAACATTCTTTGTC  
CCTTTTGGACTTGGAGCAAAAACAAAAGAAATCAGAAATCTCGTTGAGCAGCATAAGTCTTCTTCTTGG  
ATTAATAAAGATGGATCCAAACCTTTATTATGCCATTATATGATGCCAGATGAAGAAACTCCATTAGCAG  
TGCAGGCCTGTGGACTTTCTCCTCGAGACATTACCACTATTAACTTCTCAATGAACTAGAGACATGTT  
GGAAAGCCCAGATTTTAGTACAGTTTTGAATACCTGTTTAAACCGAGGTTTAGTAGACTTCTAGACAAT  
ATGGCTGAGTTCTTCGACCTACTGAACAGGACCTGCAACATGGTAACTCTATGAATAGTCTTCCAGTG  
TCAGCCTGCCTTTAGCTAAGATAATTCCAATAGTAAACGGACAGATCCATTCAGTTTGCAGTGAAACACC  
TAGTCATTTTGTTGAGGATCTGTTGACAATGGAGCAAGTGAAAGACTTTGCTGCTAATGTGTATGAAGCT  
TTTAGTACCCCTCAGCAACTGGAGAAATGATTTTCTTCAAGAAAACTACAGTGGGATTCATTTACTT

TTTAAAATACACTGGGTAAATCACCTATACTTAGAGTAACAGTTTGTTATCAAAATGCCTGATAAAATAT  
ATTCTTAATAAAAGTCTTCATTTTCATAATGAAATCAATTTATTTGGCATCTTAATATATTTTTTTAGATT  
CATCAACAGACCAGTTTTGTGGGCATATATATATACACGTGCAAATATCAGAATTGTTAATAATTTGTT  
ACACATGGACATTTGTTCCAACTGACTAAAAATCAATATAGATATTTTATATACATATATATATATAAA  
AATACAAAATTCAGTGTACTTTACCATATTAATACTGAGGAAAAATCTGTTGGAGACATAGGTCTAGGAT  
GTGTGAAGTTTGAAAAATATGCTATTTAATTATAATGTTCCCTAGACTGCTGTAAACAGAAGTGAATCA  
GACTTTTCTCCAGCTACCTTTCAAATAATAAATTATTTGTCTCAAATATACCTTGATGGAGGACTTTTT  
TATCTTATGGAAATAGTGAATTCCAACAACATGATGAACTATGTTCTTTGCTATTTCTTCACTATATT  
TTTTAAGGTTTTATTAAAAAGCCTTAGAAAGTTACATATTGGTTTAGAGGCTAAAATTGTGTTGATGCTG  
TTTACTCACCTAATTACATAGTTTTAATCATTTGTACATAATTTAAAACTTACTTTGTATTGATTTTG  
AATACAGTGAAAATCTTATTGCAATAAACTATTTTAGTAAAATATTATTTTGTGAGTTAATATTTTCA  
GCTATTAATTTACTTATCCCATAGCATTTTTGTTATTATTTTCGGAAGAGAGAGCATGCTAGTTTAAGTTT  
CATTTAATTGGTCGTGTACTTGGTGCTTTTTTGTGTTGTTAACTTGTTCAATTTAGTAAAAAGCAAATA  
GCTTTACTTTCTGAAAAAGAAATAATTCATTATCTCTAGTAATACATCTGTAATTCTTCATTTAGAAGGG  
TAATTAGGGCAAAGTAAATAAATCATTATATATCATTAGTATGTTGACATATATTTTCAGTAACATTGT  
TTTATGTTCTCCAGCGTAACATGTAGCTGAACAGTAGAAGGTAGAAAATAAATTATGACATCTCTTCTA  
AGGCCTGGCTAGGCCTGAAGCTCACTGCCAGGGAGTTTGTGTCTAGAATGTTTTTAAAAATAGGTAGTGG  
AGCCATAGCCCTCACCATAGACACCTCTGAGCCCACTGGCATTGTCTCTGAGCAGAAGATGGCTGTGCCA  
CTCACATATGCTAATCTTGGCAAATCTGCCAAGCATGTCTTCACCAAGGGATATGGATTTGGCTTAATAA  
AACCTGATTTGAAAACAAAA

>NM\_002647.4 Homo sapiens phosphatidylinositol 3-kinase catalytic subunit type 3 (PIK3C3), transcript variant 1, mRNA

ATGTTGTTTTCTGTACCTAAGTTCCCGCTGTAGGTGGTACCTTGCAGACGGTGCGATGGGGGAAGCA

GAGAAGTTTCACTACATCTATAGTTGTGACCTGGATATCAACGTCCAGCTTAAGATAGGAAGCTTGGAAG  
GGAAGAGAGAACAAAAGAGTTATAAAGCTGTCCTGGAAGACCCAATGTTGAAGTTCTCAGGACTATATCA  
AGAGACATGCTCTGATCTTTATGTTACTTGTCAAGTTTTTGCAGAAGGGAAGCCTTTGGCCTTGCCAGTG  
AGAACATCCTACAAAGCATTTAGTACAAGATGGAAGTGAATGAATGGCTGAAACTACCAGTAAAAATACC  
CTGACCTGCCCAGGAATGCCAAGTGGCCCTCACCATATGGGATGTGTATGGTCCCGGAAAAGCAGTGCC  
TGTAGGAGGAACAACGGTTTTGCTCTTTGGAAAATACGGCATGTTTCGCCAAGGGATGCATGACTTGAAA  
GTCTGGCCTAATGTAGAAGCAGATGGATCAGAACCCACAAAACTCCTGGCAGAACAAGTAGCACTCTCT  
CAGAAGATCAGATGAGCCGTCTTGCCAAGCTCACCAAAGCTCATCGACAAGGACACATGGTGAAAGTAGA  
TTGGCTGGATAGATTGACATTTAGAGAAATAGAAATGATAAATGAGAGTGAAAAACGAAGTTCTAATTC  
ATGTACCTGATGGTTGAATTCGATGTGTCAAGTGTGATGATAAGGAATATGGTATTGTTTATTATGAAA  
AGGACGGTGATGAATCATCTCCAATTTAACAAGTTTTGAATTAGTGAAAGTTCCTGACCCCCAGATGTC  
TATGGAGAATTTAGTTGAGAGCAAACACCACAAGCTTGCCCGGAGTTTAAGAAGTGGACCTTCTGACCAC  
GATCTGAAACCCAATGCTGCCACGAGAGATCAGTTAAATATTATTGTGAGTTATCCACCAACCAAGCAAC  
TTACATATGAAGAACAAGATCTTGTTTGGAAAGTTTAGATATTATCTTACGAATCAAGAAAAAGCCTTGAC  
AAAATTCTTGAAATGTGTTAATTGGGATCTACCTCAAGAGGCCAAACAGGCCTTGGAACCTTCTGGGAAAA  
TGGAAGCCGATGGATGTAGAGGACTCCTTGGAGCTGTTATCCTCTCATTACCAACCCAAGTGTGAGGC  
GTTATGCTGTTGCCCGTTGCGACAGGCCGATGATGAGGATTTGTTGATGTACCTATTACAATTGGTCCA  
GGCTCTCAAATATGAAAATTTTGATGATATAAAGAATGGATTGGAACCTACCAAGAAGGATAGTCAGAGT  
TCAGTGTGAGAAAATGTGTCAAATTCTGGAATAAATTCTGCAGAAATAGATAGCTCCCAAATTATAACCA  
GCCCCCTTCCTTCAGTCTCTTCACCTCCTCCTGCATCAAAAACAAAAGAAGTTCAGATGGCGAAAATCT  
GGAACAAGATCTCTGTACCTTCTTGATATCGAGAGCCTGCAAAAACCTCAACACTGGCTAATTATTTATAC  
TGGTATGTGATAGTGGAATGTGAAGATCAAGATACTCAGCAGAGAGATCCAAAGACCCATGAGATGTACT  
TGAACGTAATGAGAAGATTCAGCCAAGCATTGTTGAAGGGTGATAAGTCTGTCAGAGTTATGCGTTCTTT  
GCTGGCTGCACAACAGACATTTGTAGATCGGTTGGTGCATCTAATGAAGGCAGTACAACGCGAAAGTGGA  
AATCGTAAGAAAAAGAATGAGAGACTACAGGCATTGCTTGGAGATAATGAAAAGATGAATTTGTCAGATG

TGGAAGTTATCCCGTTGCCTTTAGAACCCCAAGTGAAAATTAGAGGAATAATTCCGGAACAGCTACACT  
GTTTAAAAGTGCCCTTATGCCTGCACAGTTGTTTTTAAAGACGGAAGATGGAGGCAAATATCCAGTTATA  
TTTAAGCATGGAGATGATTTACGTCAAGATCAACTTATTCTTCAAATCATTTCACTCATGGACAAGCTGT  
TACGGAAAGAAAATCTGGACTTGAAATTGACACCTTATAAGGTGTTAGCCACCAGTACAAAACATGGCTT  
CATGCAGTTTATCCAGTCAGTTCCTGTGGCTGAAGTTCTTGATACAGAGGGAAGCATTGAGAACTTTTTT  
AGAAAATATGCACCAAGTGAGAATGGGCCAAATGGGATTAGTGCTGAGGTCATGGACACTTACGTTAAAA  
GCTGTGCTGGATATTGCGTGATCACCTATATACTTGGAGTTGGAGACAGGCACCTGGATAACCTTTTGCT  
AACAAAAACAGGCAAACCTCTCCACATAGACTTTGGATATATTTTGGGTCGGGATCCAAAGCCTCTTCCT  
CCACCAATGAAGCTGAATAAAGAAATGGTAGAAGGAATGGGGGGCACACAGAGTGAGCAGTACCAAGAGT  
TCCGTAAACAGTGTTACACGGCTTTCCTCCACCTGCGAAGGTATTCTAATCTGATTTTGAAGTTGTTTTT  
CTTGATGGTTGATGCAAACATTCCAGATATTGCACTTGAACCAGATAAACTGTGAAAAAGGTTTCAGGAT  
AAATTCCGCTTAGACCTGTCGGATGAAGAGGCTGTGCATTACATGCAGAGTCTGATTGATGAGAGTGTC  
ATGCTCTTTTTGCTGCAGTGGTGGAACAGATTCACAAGTTTGCCAGTACTGGAGAAAATGAACTGGGA  
TTGACCCATCAAGATGCTTGGCTCAATAAGAAAACCACGTTAGGAGCAACCTTTGTATATTGGAGACTTC  
AGAGTAACCAGCAAGGAAGAGAAATCTTAATCTTCAAGTTACCATATTTTCCAAATATTACATGGTACCT  
GAGTTCTGCTTCCTTGGATGTCATTGCTTAAATATAGTCTTGAAGGGCTTGTTTTGAAATATTGTATATA  
TTTTTCAAATGTATACATTGTTAATAAATTAAGAAATGAGAAACATTCTTATTTATGTACATGTTATGA  
GAGTTCTGGAGGAAGTAATATGTTGAAATAGTAAACATTTTAGTTTTGAGTTTAAAAATGTTATTTTTT  
CCTCTTATATCTTCATATCAGGACAGCAGTAACCTGAATTTAGATTGTCACAGTTTACAAGTTTTTGTTT  
GTTCTTCTTTCTCTCTCTCTCCCACTCACTTTTGTGTGTTGTTTGTGTTTGCCTAATTTACATGTTT  
AAAGTTCTACTTAAAAATTTTCTTCAAGTTTACATGTGATGGCTCATTCTTCTGCAGTTCAAGAATTGC  
TTATATTTTAGAAGATACTCATTTTCTTACAAATAATTAATTTTTTGTAAGTACAGTTAATAGTTC  
TTCTAGCTTGTAAGTGTGTAAAGTAGAATATGAAAATGTGGCTATTTAGATAACTGGCCAAAAGGTCATA  
TGACCACCAGTTTTAGTATTGAGCATAAGATATTTTACATATTCATGTAAGACAATGTAAATTGTCTTT  
CTGCAATAAATTTTTTGGATGCAAATTTAGATTTCAAAGCTTTTTGATGTTATAAAGGAGTTGAGGAAC

AAAAAGCTCTTTGAAATAGCTCACCTAGACCTGTTAATGTAATATATTCTTTCTGAATTAAGCAAAATTT  
TTTTGTCTTTTAAGACTAGAACTAATCCCTCTAGCTTTTTTACTGGAACCTTGGGGAAAAAGAACAAAT  
ACAAATATACAAATGATATGAACAATATGGTAATAATCTTTGCAACTTAATATGTTACATAGTCATATG  
ACTTGGTCTTGAAGAAAAAGAATTGTTTTGGTGCTGAATAAATATTAGAAATCAAGTGACAGAGAAGAT  
GAAGGTAAAATTGTGGCACAGTTTCAGAGAATGCCGTTAATGATAACGTGTTATTTGTCTCAAATTCCTA  
GCCCTGGGCTTGCCTCTTCAGAGTGGGGTTACCGGCGAGAGGGCAAGCATGTAATTAAGAGACACTCTAG  
AGGCATATGGAATATAGTTTGTATAAAACATACCTGCTGATTAGAAAAATGGTAAAAATGAAAATACCTT  
TGTACATCATCTTAAGAGAGCTTATATATAAACTAAATGGGCAGGCTCCATCGTCTACCTTTCTTTTTCT  
TTTCTTCACATGTTTATGTCTTTTTTGTATTAGTCAGACATTTTGTAGCCCTCTGTATGCTCATTCTTGT  
AGTTCTATTTCTATTGAACTTCCTCCAAAACCTTTCTCTGAATTACCCTTGTTGAACTGACCTTTCTT  
CCGTGTGAACTCCTACACTTGCATCTCCTATTTTCAGGATTTGGCATACTTTTTCTTTAATGGGCTAAGAA  
AGTAAATATCTTCAGCTTTGGGGGGCATATGATCCCAATAGCATCAACTTAACTCTGCTAACTGGAAGGC  
AAAAGTGTATCATCTTACTCGTCTTTATAAACTCCACAGCACTCTGCATAGATATGACCATGTTTATAAG  
GAACTCAATAAATAATTTTGACACAAACATGAAATTCTAGAAGGGCAGACACTGACAACTAGTAAGGAAG  
TTGATCATGAGTAACTTTGTATTCAGTGCCACCTTAACAAGAATTGTAAAGAGGATAAACCTTTCTAGGA  
AGGTTGATGCGTGTTGGGTGAGGAAGGAGCATCTCTCAGGAGGGTAAACAGTAGCTGTGGTTTTGCTGAG  
AGATTTTGGCTGTGAGTGACAAGCCTATATCAAAAAGAAAAGTGGCTTATCAATCTCAGTTTTTATTGCT  
CAAAGCAATTCTTTACTCCTATTTTTTCCAAATTCCATTGTTTTTACTCTTTAGAGCTCTATCCTCAGAG  
TGTAGTCTGCATATTTCTTTATTATCATTGCCATGTGACTTCTTTGGTGACAAGTTCAGTGATATTTCAA  
GCATGATGTTTTGAGTTTGAGAAATGTATTTGTGAGGACACATCACTTAATTAATAAAAAAGTGTGAGTACT  
ATGGTCATTAAGTTATTCAGAGTGAGATTTCTGAGAGGAGAAGAGAGAATGTAGATGGCAGTTATTGAGA  
GTGGGGCTATAGGACAAAAAGAAGAAAAGTATGGTTAACATTGCCAAATAAAGGGTCATACAGCCTTGCT  
TTTTGCTGGAGTTAGCAAAAATCATTCTCCATATGATAGTTTTAGATGTTCCCCAGCTCATTTGTATTAT  
TGAGTTTTTCAGCTGGGTATATATTATAATAACAGTCAACATGATGTAGGGGCTCAGTATTACATGGCAGG  
GCTATACTAATTGCTTCATATGCCTTATCTCATTATTCTGTGAGATAGAATTGTCTCCTCATTTTTTAGT

TGAAATAACTGAAGTTTAAAGCAATTGAATCATCTGCCCAAGGATAAGCTGCTGGTGAGAGCAGAGTTGG  
GATTTGAAGTCGAGTTAGACCCAGTGATCACAGTCTTGACGATTAAATTCTTCCAGCTTTCATTTTTCA  
CTGAGATAATGGTAGTGATAGTACTGACCTCTAATGTGTGCATTTGTGGGTATGTGGTCCATTGAGCTTT  
AATCCCCAGAAGACAAGGCTTATTCCTTTTCTTATTTTTGGTCATGTTTTATTTTTCCATTGCTTTTAAC  
AGGATTACCAAGGCACACTCAGTAGTCAGTAAACACATTTCTAGGAAAGGTGTTGTGTCATCATGCCAC  
ATATTCATACTTTCCTTGGGTTGGAAAATAGATCATTGAGTAAAAACATACAGGAAAAATGAATCTTGCC  
AATGCAATTGTTAACCTACAACCATAATATACCTTAAGTATATTTTTGCACATAAGTATAACATTGCGAT  
TTAAACAATAAACAGATTGAGATTCTAAGGAGCATTTTGTAAAGTAATTAATAATGTTTATTTAGAGA  
GATCACACAACCTCAAATAAAAACTGACATAGATTGAACACCTTGAGAATAAACTTTAGTGCCAAATGGA  
AAATAATTTTTTACAAGTAAATTTGAAGAACAATGTGAACTTTCTATAATTATATACAGAAAATATACTG  
ATTTGCCAAAATGAGTAATTTTGATATATTAATATTTCACTTATAAGAATGCATACCACCTGATCCAGGA  
TGGGATCCAGGAACAGAAAAAGAACATTAGGTAAAAATGACAGAAATCTGAATATAGTATAGAGTAGCTA  
AAAACAAACCAAAAAAAAAAAAAAAAAAAAAAGGAAAAACAGAATAAGCCTCAGAAGATAGTGAGCATCCC  
ACCTGGGTGACCACTTAGAGAAGCTGAGGTGGGACCCCTGCATCCGATAAGTGGCTGCACTAGACCACAG  
GAACCAGACTCCACTGTAAGAACTAGAGTGGGAATGGACATGTCAAAACCTCCTGGGAACCTTATTAAT  
GTGCACATTCCCAATCCCCACTCCTGAGCAGCCAAATCAATCTGCAGGTGGGCCTTGTTGAGTTTTCCAG  
GGGATTCCGATGCCTGCTAGATTTAACCAGTAGATGAGATGTTAAGTTATCCTGTAGTCCAGAGATTCCA  
CAGGCCAGTGTGAGGGAACAGGGGCCAGGGCTGGGAAGGCATAAGAACAGAAGATAAATTTGAGGCTCTG  
TTACGCTGGTCATCCAACCCAACAGGTATCTCTTGTTATATGCTAACTTCATTTTCCCTTCTTGTCCA  
TAGTGGGAAAAAATAATTTTTAACTGGCTATGTAGTTAAAAAACCTAACAAAAAGCACTTTTCTATATAA  
TGAGTGGTTTATATTAAGAATAGGTACAATGTAAATACTGGTAAGTGAAAGTTCATTTTGTTGAGTGCTA  
TGGGCTGGTACATTGCATTTCAACACTAGTTTTTTACTTTTATCTACCCTGAGGGTAGATAACCCATATT  
CCAAAATACAGTATTATTTTCATTTGCTGTAACATTTTAAGAAATATGTAGTTTCTAAACTTCATATAC  
TTTATATGGAATATGAACAACTTTAATATGAATAAATAGTCTAGAAAAAATTTAGGAAAAATTGCCATG  
AAATCATGAGCTAAGTCAATGGTTATTTTAAACCACTTAATTTTGAGACTAGTATTTCATACAGAAAAAG

CTAATACTGATATCACACACTAATTGTGTATAAAACACTAGGAATGTCAAAATAGAACATAAGAAAATGA  
GTCTAGTGGACCCACTGCATAGTGTAACCTTGGGATGAATTTAAAAGAATATTTAAGTCACAGTCAATTT  
TCTGTTGGTCTAATTTTACCAAATAACCCCTAAATAAGAAGTCTGATTTATCTAAAATAGAAGTTAACA  
TAGCATCCCAGTATTGCCATTCTAAACTCTGGCATGTAAATGGGAGAAATGGAAATAAGCTCAAAATGG  
GTAGAGTAACCCATTTCTGCATGAACCATAGAATTTAACTAGAATTTGGCTGGCTCATGCCTGTAATGCC  
AGCACTTTGGGAGGCCAAGGCAGGCAGATCACTTGAGCCAGGAGTTTGAGACCAGCCCGGGCAACATGG  
TGAAACTCCATCTCTTCAAAAATATATATTTGTGTGTGTGTGTGTGTGTATGTGCGTGCACAAAATTAG  
CTGAGTGTGGTGGTTCACACTTGTAATCACAGCTACCTGGGAGGCTGAGGCAGGAGGATTGCTTGAGCCT  
GGGAGGCAGAGGTTGCAGTGAGCTGAGATTGCACCATTCAGCTGCAGCCTGGGTAATAGAGCGAGACAAC  
TCTATCTCAAAAAAAGAATTTCACTAGAATTTATATCTTCAGTGTTTGCATTAGATTGTCACCAGCACT  
ATCTGCCTTGTGACTGTCAGGACTAATCCTTATATCATTTATCTTATGTCCTTTACCTCAGTTTATGTCT  
GTCACCACAAGAAACCCAGACCTCCCTAATCATACCATATGCCCTGGTCTTACCCACATACAGCTCGGTA  
CAACTGCATTTCCCCAAACCTCAGAACTCCTTGGGCCATCACTGTCAGAGACATTTGAACTAGAGCAACT  
CCATCTTGAGTAGGGACTGGGTATAATGAAGCTGAGACCCACTGGGCTGCATTCCCAGGAAGTTAGGCAT  
TCTTAGTCACAGGATGAGATAGGAGATTGGCTCAAGATAAGGTCACAAAGACCTTGCTGATAAAACAGTC  
TGTGGTAAAGAAGCCAGCCAAAACCCACCAAAACCAAGACGGGAATGAAAGTGACCTCCGGTCATCCTCA  
CTGCTCATTATACGCTAGTTATAATGCATTGACATGCTAAGAGACACTCCCACCAGCACCATGACAGTTT  
ACAAATGCCATAACAACATCAGGAAGTTACCCTATATGGTCTAAAAAGGGGAGGAACCCCTCAGTTCTGAG  
AATTCCTTGAAAATTCATGAATAATCCACCCCTTGTTTAGCATATGATCAAGAAATAATCATTAAAAAA  
TAGCCAACCAGCAGCTCATGCTGCTGGTCTGCCTATGGAGTAGCCATCCTTCTTTATTAACCTGCTTTC  
ACTTTATGGACTCCCCTGAATTCTTCTGCAGGAGATCCAAGAACCCTCTCTTGAGTCTTAACCAGGATC  
CCTTCCAGTAACTTCAGCAGGATCTGTGAGTGCCAGTTTCCTTCTGTGGTGCAAACTAGGTGCTAAGT  
ACACTTTTTCCCCCTTCTCTATTTTTAAAAGAACTTTCAGCCCTTTTGAAGTGGGTACATTGTCTGG  
AGTACATACCCTGGGGTTCATTGTTATAGGAGAATTTAGGACACAGACACACGAGGAGTTTAGGAGCAGA  
GGTTTAATAGGTAGAAGAGAAGGGAAAGAGAAACAGCTTCCTCTATAGATGTCTGCACTGACACCGTGGC

TTTAAGGCATGGCCCATGATGTGTCTCCGAGTGGAAAAGACTGGTTGGTGGTGAATGCGCCAAATTTTAT  
AGTCCGGTTTGAGGAGGTGGTTTCTGATTGGTTGCATCATGTATGACGTTTGCAAGGTGCATGTGGAAGG  
CTGGTCGCCCCACCCTAATCTTATGCAAATGGGCTTTCCAGTTGATTGGGTCCATCTTGTGTAACACGTG  
GCTGGCAGAGAAGGGAAGATGAAGCCACCATCTTGAAAATGTCTAGTCCTTAGTTTCTGCTGGCATTAC  
CCATGCAAGCTGCCAGCTTGTCTATGTCTGCAGCTCAACTTTACAGGCTGCTCTTTGTTAGCAAATGATT  
TGGAGCTTCTTTTCATTAAAGAAAAAGCCTTACCGAGGACTCCCATACCCTTGCTTTCTGCTTAAGTGA  
TTTCTTCTTAACCTCTATGTCAATTTTATACAGCATGAAATAATGATGTATCTATAAATGAGCCTTTGCA  
AGATTACCATTATCAAAGAAAACCAAGTATGTTTAGTTAACTGTTTGTAATAAATAAATGGTTAGTAGAA  
TGTCTAATTCAATAAATGTTTCATAAATGAGTAA

>NM\_014602.3 Homo sapiens phosphoinositide-3-kinase regulatory subunit 4 (PIK3R4), mRNA

GAGGTCAGACCGTTGCTTCCCGGGAGTTCGGCGTTTGCTGGGGCTGCAGCAGCTGAAGTGTAGTGTTT  
TCTTGGGACTGGCGGTCTGCACTTCTCTCCCGGGTTCATCTCCCCCGCCCGGTGGTGAGGCCCTCGAG  
GAGGGCTCGGACGGGTGTAGCGATCCGCGCTAGAGGAAGACGAGGCCCGGGAACGCATGTCCCCCAGGGC  
AGGTTAGGGGGCTGGAGGGGTCAAATCCCGGGGTACTTGTGGAGACTCTTAGCGTGGCTTCTTCTCTCT  
GCTGAGACCCCGAGAGCTTCCAGTTCTCCTCCCAGGACCACCGGGGTTCTGAAGATCGGGACTTTTC  
TGCGCCCCCTCCACCAACAGCCCATCTCCTGTCTATGAAGAAAGACCCTTCGTAGAAACAACCTCCCCGCT  
GCTGACGCGTTTTCCCGTCCCGTCCCCGAAGTAGTCTACTATGACCTCGTTGTGAGCCTCTGAACGATTT  
TGACACTTTCCCGAGGCCTAGGGTATTATATCCTAACCTTACTAAAGACCACAGAGGTGCTTGCCATTAT  
GGGAAATCAGCTTGCTGGCATTGCTCCCTCCCAGATCCTTCTGTAGAGAGTTATTTTTCAGATATTCAT  
GACTTTGAATATGATAAAAGCCTGGGGAGTACTCGGTTTTTTAAAGTTGCTCGAGCCAAGCACCGAGAAG  
GCCTGGTCGTTGTGAAGGTTTTTGCAATTCAGGATCCCACATTGCCTTTAACAGCTATAAACAAGAGCT  
GGAGGAACTGAAAATCAGGCTTAATTCTGCACAGAATTGTCTACCTTCCAGAAAGCATCAGAAAAAGCA

TCTGAGAAAGCAGCTATGCTCTTTAGGCAGTATGTGCGAGACAATCTCTATGATCGCATCAGTACCCGTC  
CATTCTTGAATAACATTGAGAAGCGCTGGATTGCTTCCAGATCCTGACAGCTGTGGACCAAGCACACAA  
ATCTGGAGTTCGTCATGGGGACATCAAGACTGAGAATGTGATGGTCACCAGTTGGAATTGGGTCTTCTA  
ACTGATTTTGCCAGTTTTAAGCCCACTTATCTTCCAGAAGACAACCCGGCAGATTTCAATTATTTCTTG  
ACACATCACGGAGGAGAACTTGCTATATTGCTCCTGAACGTTTTGTTGATGGTGGGATGTTTGCCACTGA  
GTTAGAATATATGAGAGATCCTTCAACTCCGCTTGTAGACTTAAATAGCAATCAGAGAACAAGAGGAGAG  
TTGAAGAGAGCAATGGACATCTTTTCAGCAGGTTGTGTGATAGCTGAGCTTTTACAGAAGGTGTACCAT  
TATTTGATCTCTCTCACTTTTGGCTTATAGAAATGGACATTTTTTCCCTGAACAAGTGCTAAATAAAAT  
TGAAGATCACAGTATCAGAGAATTGGTAACTCAGATGATTCACCGTGAGCCAGATAAACGTTTAGAGGCA  
GAAGATTACTTAAACAGCAGCGTGGCAATGCCTTTCCTGAAATATTTTACACTTTTCTTCAGCCCTACA  
TGGCCCAGTTTGCCAAGGAAACGTTTCTTCTGCAGATGAGCGTATTCTGGTTATACGGAAGGATTTGGG  
CAACATTATTCACAATCTCTGTGGACATGATCTGCCAGAAAAAGCCGAAGGAGAGCCTAAGGAAAAATGGG  
CTGGTTATCTTGGTATCTGTTATAACATCCTGCCTACAGACCCTTAAATACTGTGATTCCAACTAGCTG  
CTTTGGAAGTATTCTTCATTTGGCTCCAAGATTAAGTGTTGAAATCCTTTTGGATCGTATTACTCCATA  
TCTTTTGCATTTAGCAATGACTCTGTTCCCTAGGGTGAGGGCTGAAGCCTTGAGGACGTTGACCAAAGTT  
CTTGCTCTCGTCAAAGAGGTTCCCTCGTAATGATATCAATATTTATCCGGAATACATTCTGCCAGGCATAG  
CCCCTTAGCCCAAGATGATGCTACTATCGTTAGACTAGCCTATGCTGAAAACATAGCTCTGCTGGCAGA  
AACAGCTCTGAGATTCCTGGAATTAGTACAGTTAAAAAATCTTAATATGGAAAATGACCCCAATAATGAA  
GAAATAGATGAGGTTACACATCCAAATGGAAATTATGACACAGAGCTCCAAGCCTTACATGAAATGGTCC  
AGCAGAAAGTTGTTACTTTGCTAAGTGACCCTGAAAATATTGTAAAACAAACCTTGATGGAAAATGGAAT  
AACACGGCTGTGTGATTCTTTGGACGTCAGAAAGCCAACGATGTTTTGTTGTCCCATGATTACTTTC  
CTAAATGATAAGAATGATTGGCATCTACGTGGAGCATTTTTTGATAGTATAGTTGGTGTGCTGCCTATG  
TTGGCTGGCAAAGCTCCTCAATTCTCAAGCCTCTGCTGCAACAAGGTCTTAGTGATGCTGAGGAATTTGT  
CATTGTGAAAGCTCTTTATGCCCTTACTTGTATGTGCCAGTTAGGACTGCTACAAAAACCCCATGTTTAC  
GAATTTGCCAGTGATATTGCCCCCTTCTGTGTCATCCCAATTTATGGATACGTTATGGTGCCGTGGGAT

TTATCACAGTGGTAGCTCGTCAAATAAGTACAGCTGATGTCTACTGTAACTGATGCCTTATCTTGACCC  
ATATATTACCCAACCAATAATACAGATTGAAAGAAAACCTGTTCTGCTCAGTGTTTTAAAGGAACCAGTA  
AGTCGTTCTATATTTGATTATGCTTTGAGGTCTAAAGATATTACTAGCTTGTCAGACATCTTCACATGC  
GTCAGAAGAAACGAAATGGTTCTCTCCCGACTGCCCTCCGCCAGAGGATCCTGCCATAGCACAGCTTCT  
GAAGAAGTTGCTCTCACAGGGAATGACAGAGGAAGAGGAAGACAACTTCTGGCACTGAAAGACTTCATG  
ATGAAATCTAATAAAGCAAAGGCCAATATAGTGGACCAGAGCCATCTTCATGATAGTAGTCAGAAAGGTG  
TAATTGACTTGGCAGCTTTAGGCATAACTGGGAGACAAGTTGATCTTGTTAAAACCAAACAAGAACCAGA  
TGACAAACGGGCCAGAAAACATGTAAACAAGACTCAAATGTAAATGAAGAATGGAAAAGCATGTTTGGG  
TCACTGGACCCACCAAACATGCCACAGGCCCTACCTAAAGGGAGTGATCAGGAGGTGATTCAGACTGGGA  
AACCTCCTCGTTCCGAGTCCTCTGCTGGCATTGTGTCCCTTTGTCAACTTCTTCACAGGTTCCAGAAGT  
GACAACTGTCCAAAATAAAAAACCAGTAATACCGGTTTTAAGTAGTACAATCTTACCATCCACCTATCAG  
ATTCGAATTACAACCTGTAAAACTGAACTTCAGCAACTCATCCAGCAAAAGCGGGAGCAGTGCAATGCTG  
AGAGAATAGCTAAGCAGATGATGGAAAATGCTGAATGGGAGAGTAAACCACCACCACCTGGATGGCGTCC  
TAAAGGGCTGTTAGTTGCCATCTTCATGAGCATAAATCTGCTGTGAATCGAATTAGAGTCTCTGATGAA  
CACTCACTTTTTGCAACATGTTCAAATGATGGCACAGTGAAAATCTGGAACAGTCAAAAGATGGAGGGGA  
AGACCACCACTACCAGATCTATTCTTACATACAGCCGAATTGGAGGACGAGTCAAGACGCTCACATTCTG  
CCAAGGCTCCCACTATTTAGCCATAGCATCTGATAATGGTGCTGTCCAGCTTCTTGGAATTGAGGCTTCT  
AAGCTGCCCAAGTCTCCTAAAATCCATCCTCTACAAAGCAGAATTCTAGATCAGAAGGAGGACGGTTGTG  
TTGTGGATATGCATCACTTCAACTCTGGAGCACAGTCTGTTCTTGCCTATGCCACTGTGAATGGCTCTCT  
GGTTGGCTGGGACCTTAGGTCTTCAAGCAATGCGTGGACTTTAAAGCATGATTTAAAGTCGGGCCTCATC  
ACTTCCTTTGCTGTGGACATCCACCAATGCTGGCTCTGCATTGGTACAAGCAGTGGTACCATGGCTTGTT  
GGGACATGAGGTTCCAGTTGCCAATTTCAAGTCACTGTCATCCTTCCAGGGCTCGAATCAGACGCCTCTC  
AATGCACCCTCTGTATCAGTCCTGGGTGATTGCAGCTGTTCAAGGCAACAACGAAGTGTCATGTGGGAC  
ATGGAGACTGGTGACAGAAGATTTACTCTCTGGGCCAGCAGTGCACCACCACTTTCTGAATTACAGCCTT  
CTCCTCATAGCGTCCATGGTATCTACTGTAGTCCTGCAGATGGAAATCCTATCCTACTAACAGCTGGCTC

AGATATGAAAATAAGGTTTTGGGACTTGGCTTACCCAGAAAGGTCCTATGTTGTTGCAGGAAGTACTAGT  
TCCCCATCTGTGTCTACTACAGGAAAATAATTGAAGGCACTGAAGTTGTCCAGGAAATTCAGAATAAGC  
AGAAAGTAGGACCAAGTGATGACACCCCTCGAAGGGGGCCAGAGTCCCTGCCCCTGGGACATCATGACAT  
CATCACTGATGTCGCCACATTCCAGACCACACAGGGCTTCATCGTAACTGCTTCTAGAGATGGGATTGTG  
AAGGTGTGGAAATAAACCTACTGATTTGTATAAATTTAATAGTTATAAATATAATACTATAACTCGAG  
AAAAGGCATTTCTAGAGAACAGATTCATTTGCTTAATTTTCAAATTATGTCTCCATATTACTGTTTCAT  
GACTGACTGACTAAATGACACCCAAAATGGTTAAGATGTACTTGACTAGTTTACTTATGCATCTCTTTGC  
AAGAATCAGCCAGCCAACAATGTCTGGGATTTTTATTGTATATGTTATAGAGGTGAGAAATGTAAAATAT  
GAAAATGAATATGTTTATTTTGTATTGAAAAAGATGGTTGAAAAGATGGTTGTAAGCTATTATAGTATAA  
ACACATTTTTGCTATTA AAAATGCTATTCAAAGCAGTTAACTGTA

>NM\_032409.3 Homo sapiens PTEN induced kinase 1 (PINK1), mRNA; nuclear gene for mitochondrial product

AGAGGCACCGCCCCAAGTTTGTGTGACCGGCGGGGACGCCGGTGGTGGCGGCAGCGGCGGCTGCGGGG  
GCACCGGGCCGCGGCGCCACCATGGCGGTGCGACAGGCGCTGGGCCGCGGCCTGCAGCTGGGTGCGAGCGC  
TGCTGCTGCGCTTACGGGCAAGCCCGGCCGGGCCTACGGCTTGGGGCGGCCGGGCCCCGGCGGCGGGCTG  
TGTCCGCGGGGAGCGTCCAGGCTGGGCCGAGGACCGGGCGCGGAGCCTCGCAGGGTCGGGCTCGGGCTC  
CCTAACCGTCTCCGCTTCTTCCGCCAGTCGGTGGCCGGGCTGGCGGCGCGGTTGCAGCGGCAGTTCGTGG  
TGCGGGCCTGGGGCTGCGCGGGCCCTTGCGGCCGGGCAGTCTTTCTGGCCTTCGGGCTAGGGCTGGGCCT  
CATCGAGGAAAAACAGGCGGAGAGCCGGCGGGCGGTCTCGGCCTGTCAGGAGATCCAGGCAATTTTACC  
CAGAAAAGCAAGCCGGGGCCTGACCCGTTGGACACGAGACGCTTGCAAGGCTTTCGGCTGGAGGAGTATC  
TGATAGGGCAGTCCATTGGTAAGGGCTGCAGTGCTGCTGTGTATGAAGCCACCATGCCTACATTGCCCCA  
GAACCTGGAGGTGACAAAGAGCACCGGGTTGCTTCCAGGGAGAGGCCAGGTACCAAGTGCACCAGGAGAA  
GGGCAGGAGCGAGCTCCGGGGGGCCCTGCCTTCCCCTTGCCATCAAGATGATGTGGAACATCTCGGCAG

GTTCTCCAGCGAAGCCATCTTGAACACAATGAGCCAGGAGCTGGTCCCAGCGAGCCGAGTGGCCTTGGC  
TGGGGAGTATGGAGCAGTCACTTACAGAAAATCCAAGAGAGGTCCCAAGCAACTAGCCCCTACCCCAAC  
ATCATCCGGGTTCTCCGCGCCTTCACCTCTTCCGTGCCGCTGCTGCCAGGGGCCCTGGTCGACTACCCTG  
ATGTGCTGCCCTCAGCCTCCACCCTGAAGGCCTGGGCCATGGCCGGACGCTGTTCTCGTTATGAAGAA  
CTATCCCTGTACCCTGCGCCAGTACCTTTGTGTGAACACACCCAGCCCCGCCTCGCCGCCATGATGCTG  
CTGCAGCTGCTGGAAGGCGTGGACCATCTGGTTCAACAGGGCATCGCGCACAGAGACCTGAAATCCGACA  
ACATCCTTGTGGAGCTGGACCCAGACGGCTGCCCCTGGCTGGTGATCGCAGATTTTGGCTGCTGCCTGGC  
TGATGAGAGCATCGGCCTGCAGTTGCCCTTCAGCAGCTGGTACGTGGATCGGGGCGGAAACGGCTGTCTG  
ATGGCCCCAGAGGTGTCCACGGCCCGTCCTGGCCCCAGGGCAGTGATTGACTACAGCAAGGCTGATGCCT  
GGGCAGTGGGAGCCATCGCCTATGAAATCTTCGGGCTTGTCATCCCTTCTACGGCCAGGGCAAGGCCCA  
CCTTGAAAGCCGCAGCTACCAAGAGGCTCAGCTACCTGCACTGCCCCAGTCAGTGCCTCCAGACGTGAGA  
CAGTTGGTGAGGGCACTGCTCCAGCGAGAGGCCAGCAAGAGACCATCTGCCCCAGTAGCCGCAAATGTGC  
TTCATCTAAGCCTCTGGGGTGAACATATTCTAGCCCTGAAGAATCTGAAGTTAGACAAGATGGTTGGCTG  
GCTCCTCCAACAATCGGCCGCCACTTTGTTGGCCAACAGGCTCACAGAGAAGTGTTGTGTGGAACAAAA  
ATGAAGATGCTCTTTCTGGCTAACCTGGAGTGTGAAACGCTCTGCCAGGCAGCCCTCCTCCTCTGCTCAT  
GGAGGGCAGCCCTGTGATGTCCCTGCATGGAGCTGGTGAATTACTAAAAGAACATGGCATCCTCTGTGTC  
GTGATGGTCTGTGAATGGTGAGGGTGGGAGTCAGGAGACAAGACAGCGCAGAGAGGGCTGGTTAGCCGGA  
AAAGGCCTCGGGCTTGCCAAATGGAAGAAGTTGAGTGAGAGTTCAGTCTGCAGTCCTCTGCTCACAGACA  
TCTGAAAAGTGAATGGCCAAGCTGGTCTAGTAGATGAGGCTGGACTGAGGAGGGGTAGGCCTGCATCCAC  
AGAGAGGATCCAGGCCAAGGCACTGGCTGTCACTGGCAGAGTTTGGCTGTGACCTTTGCCCTAACACGA  
GGAACCTGTTTGAAGGGGGCAGCGTAGCATGTCTGATTGCCACCTGGATGAAGGCAGACATCAACATGG  
GTCAGCACGTTCACTTACGGGAGTGGGAAATTACATGAGGCCTGGGCCTCTGCGTTCCCAAGCTGTGCGT  
TCTGGACCAGCTACTGAATTATTAATCTCACTTAGCGAAAGTGACGGATGAGCAGTAAGTAAGTAAGTGT  
GGGGATTTAACTTGAGGGTTTCCCTCCTGACTAGCCTCTCTTACAGGAATTGTGAAATATTAAATGCAA  
ATTTACAACTGCAGATGACGTATGTGCCTGAACTGAATATTTGGCTTTAAGAATGATTCTTATACTCTG

AAGGTGAGAATATTTTGTGGGCAGGTATCAACATTGGGGAAGAGATTTTCATGTCTAACTAACTAATT  
TACATGATTTTTAGGAAGCTATTGCCTAAATCAGCGTCAACATGCAGTAAAGGTTGTCTTCAACTGA

>NM\_014330.5 Homo sapiens protein phosphatase 1 regulatory subunit 15A (PPP1R15A), mRNA  
GCTCTTATCGGTTCCCATCCCAGTTGTTGATCTTATGCAAGACGCTGCACGACCCCGCGCCGCTTGTCTG  
CCACGGCACTTGAGGCAGCCGGAGATACTCTGAGTTACTCGGAGCCCGACGCCTGAGGGTGAGATGAACG  
CGCTGGCCTCCCTAACCGTCCGGACCTGTGATCGTTCTGGCAGACCGAACCGGCGCTCTGCCCCGGG  
GTGACGCGCAGCTCCCAGCCGCCAGACACATGGCCCCAGGCCAAGCACCCCATCAGGCTACCCCGTGGA  
GGGATGCCACCTTTCTCCTCTGTCCCCAGTGATGGGCCTCCTCAGCCGCGCCTGGAGCCGCCTGAG  
GGGCCTGGGACCTCTAGAGCCCTGGCTGGTGGAAGCAGTAAAAGGAGCAGCTCTGGTAGAAGCTGGCCTG  
GAGGGAGAAGCTAGGACTCCTCTGGCAATCCCCATACCCCTTGGGGCAGACGCCCTGAAGAGGAGGCTG  
AAGACAGTGGAGGCCCTGGAGAGGACAGAGAAACACTGGGGCTGAAAACCAGCAGTTCCCTCCTGAAGC  
CTGGGGACTTTTGGATGATGATGATGGCATGTATGGTGAGCGAGAGGCAACCAAGTGTCCCTAGAGGGCAG  
GGAAGTCAATTTGCAGATGGCCAGCGTGCTCCCCTGTCTCCAGCCTTCTGATAAGGACACTGCAAGGT  
CTGATAAGAACCCAGGGGAGGAGAAAGCCGAGGAAGAGGGAGTTGCTGAAGAGGAGGGAGTTAACAAGTT  
CTCTTATCCACCATCACACCGGGAGTGTTGTCCAGCCGTGGAGGAGGAGGACGATGAAGAAGCTGTAAAG  
AAAGAAGCTCACAGAACCTCTACTTCTGCCTTGTCTCCAGGATCCAAGCCCAGCACTTGGGTGTCTTGCC  
CAGGGGAGGAAGAGAATCAAGCCACGGAGGATAAAAGAACAGAAAGAAGTAAAGGAGCCAGGAAGACCTC  
CGTGTCCCCCGATCTTCAGGCTCCGACCCAGGTCCTGGGAGTATCGTTCAGGAGAGGCGTCCGAGGAG  
AAGGAGGAAAAGGCACACAAAGAACTGGGAAAGGAGAAGCTGCCCCAGGGCCGCAATCCTCAGCCCCAG  
CCCAGAGGCCCCAGCTCAAGTCCTGGTGGTGCCAACCCAGTGATGAAGAGGAGGGTGAGGTCAAGGCTTT  
GGGGGCAGCTGAGAAGGATGGAGAAGCTGAGTGTCTCCTGCATCCCCCACCAAGTGCCTTCCTGAAG  
GCCTGGGTGTATTGGCCAGGAGAGGACACAGAGGAAGAGGAAGATGAGGAAGAAGATGAGGACAGTGACT

CTGGATCAGATGAGGAAGAGGGAGAAGCTGAGGCTTCTCTTCCACTCCTGCTACAGGTGTCTTCTTGAA  
GTCCTGGGTCTATCAGCCAGGAGAGGACACAGAGGAGGAGGAAGATGAGGACAGTGATACAGGATCAGCC  
GAGGATGAAAGAGAAGCTGAGACTTCTGCTTCCACACCCCCTGCAAGTGCTTTCTTGAAGGCCTGGGTGT  
ATCGGCCAGGAGAGGACACGGAGGAGGAGGAAGATGAGGATGTGGATAGTGAGGATAAGGAAGATGATTC  
AGAAGCAGCCTTGGGAGAAGCTGAGTCAGACCCACATCCCTCCCACCCGGACCAGAGGGCCCACTTCAGG  
GGCTGGGGATATCGACCTGGAAAAGAGACAGAGGAAGAGGAAGCTGCTGAGGACTGGGGAGAAGCTGAGC  
CCTGCCCCCTCCGAGTGGCCATCTATGTACCTGGAGAGAAGCCACCGCCTCCCTGGGCTCCTCCTAGGCT  
GCCCCCTCCGACTGCAAAGGCGGCTCAAGCGCCAGAAACCCCTACTCATGATCCGGACCCTGAGACTCCC  
CTAAAGGCCAGAAAGGTGCGCTTCTCCGAGAAGGTCACTGTCCATTTCTGGCTGTCTGGGCAGGGCCGG  
CCCAGGCCGCCGCCAGGGCCCCCTGGGAGCAGCTTGCTCGGGATCGCAGCCGCTTCGCACGCCGCATCAC  
CCAGGCCCAGGAGGAGCTGAGCCCCCTGCCTCACCCCTGCTGCCCCGGGCCAGAGCCTGGGCACGCCTCAGG  
AACCCACCTTTAGCCCCCATCCCTGCCCTCACCCAGACCTTGCCTTCCTCCTCTGTCCCTTCGTCCCCAG  
TCCAGACCACGCCCTTGAGCCAAGCTGTGGCCACACCTTCCCGCTCGTCTGCTGCTGCAGCGGCTGCCCT  
GGACCTCAGTGGGAGGCGTGGCTGAGACCAACTGGTTTGCCTATAATTTATTAAGTATTTATTTTTTCTA  
AGTGTGGGTTTATATAAGGAATAAAGCCTTTTGATTTGTA

>NM\_006253.5 Homo sapiens protein kinase AMP-activated non-catalytic subunit beta 1 (PRKAB1), mRNA

GACTCCTCCGCAGGCTCCTTGGGACCCGCGGTTCCGGGAGTCCCTTGCTCAGGGTCCCTTTCCTGCAGT  
GAGGCGCCGTCCGCCTTCCCTGTGTCCCCGAGACCCCCATCATGGGCAATACCAGCAGTGAGCGCGCCG  
CGCTGGAGCGGCATGGTGGCCATAAGACGCCCCGGAGGGACAGCTCGGGGGGCACCAAGGACGGGGACAG  
GCCCAAGATCCTGATGGACAGCCCCGAAGACGCCGACCTTTCCTCCACTCCGAGGAAATCAAGGCACCAGAG  
AAGGAGGAATTCCTGGCCTGGCAGCATGATCTGGAAGTGAATGATAAAGCTCCCGCCAGGCTCGGCCAA  
CGGTGTTTCGATGGACGGGGGGCGGAAAGGAAGTTTACTTATCTGGGTCCTTCAACAACTGGAGTAACT

TCCCCTCACCAGAAGCCACAATAACTTTGTAGCCATCCTGGATCTGCCGGAAGGAGAGCATCAGTACAAG  
TTCTTTGTGGATGGTCAGTGGACGCACGACCCTTCCGAGCCCATAGTAACCAGCCAGCTTGGCACAGTTA  
ACAACATCATTCAAGTGAAGAAAAGTACTTTGAAGTATTTGATGCTTTAATGGTGGATTCCCAAAAGTG  
CTCCGATGTGTCTGAGCTGTCCAGTTCTCCCCCAGGACCCTACCATCAGGAGCCCTACGTCTGCAAACCC  
GAAGAGCGCTTTCGGGCACCCCCTATTCTCCCCCAGGACCTACCATCAGGAGCCCTACGTCTGCAAACCC  
GGATTTCTGTGATCCAGCTTTGCTTCTGAGCCCAATCACGTCTGCTGAACCACCTATACGCGCTGTC  
TATCAAGGATGGAGTGATGGTGCTCAGCGCAACCCACCGGTACAAGAAGAAGTACGTACCCACCTTGTTA  
TACAAGCCCATATGAAGAGCTGGGGGCGGATGGTGGCCCAGGAGACAGCACACCACCAGGCTCCACACGT  
GCATGCTTTCCTCAAGAGGGAATGGACTGTACATTGCTCATTTCACTCTTCAGAAGACATTTTCATACC  
TGCCCTGGTCCTGCTTGAAGGTTTGTCCAGGCAGAGCAGCTCCTGCAGCGCCTCGGTCTGTGACAGTCCT  
CCTAGCACCCCATGGCTTTGAGCCTCGGGGACTCATCAAGTCCAAGAAAAGAGGGAGGGGTGGCAGAGG  
ATCTGCAGCCCTGGCCCCGCGGTGCATGAGGCTGGGTGCAGTTCTAAACCTACATTCTCGATTTTTCTTA  
AGCCAAAATGAATGCTAACTCCTTTGCCAGTAAAATTCTGGGAAACAGGGACTGAGGCCACACATCATT  
TCCAGTCATCTGTGTGTTTTTAAGGCCAGCCACTTGTCCTGTTGAGGCCTGGCTATGGAATAAATACA  
GTGTTGGTCTTGCCTGTCCTTCAAAATCAACAACAGATTGTCTCTCGGCTCCAGGGAGGTGTCATTTCTA  
TAGAAATTAGAAGCTTTCTGATTTCTAGATGAGGTTTTACAATTGTTTCTTACAGTCATGTGCACTAAGT  
ACTCTTTTTGTAAGCAGAGGTGGCTGGCTCTGCAGCCTTAAGGCCATTTTTTAAGTCACCACGTCTAGAA  
GTCACATGAACTCTGCTCAGCAATAATCTGTTCTCAGAACAGACTTTTCAACCTGCTGCCGGATTTCTCC  
ATTCAGCTGGATGATCCTCAGGACTGACCAGTTAGCTGGCAGGTTGTCCAGCTTTTTATTCCAGTCATAA  
TAGGTGACAGTGTTAACCGTGAAAAGTTGAGAGGCACTCTGCCCTCTCCCTATAAAATCACACAGCGTG  
ATTTTACAAGGTCCCGTGGCACCTTGCTCAGGACCTCTGCCCTAGTTAGCAAGACTGCAGCAGTTGCTG  
TTGCTTATTCTGAAAGGAATGTAGAACTTGACAGCAGCCTTCTGAGTCTGGGTGAGGAAGATGTCCTTTG  
GACCAAAGCAGACTTCTTTATACGCAGCTCAGTTTCCCGGAGTCGCCACAGATGTACCCACTAGCCCAG  
GTTGCTGTGAGTCAGCGGAAGCTCCCGTTATGCCCTTTGCTCCTGGTGGGAGAGGGAGGAGTGAGCTCCC  
TGGGTTCCAGTATTTACTTGGTATACCTGAGTTTGGGGGTACCCTTTTTTGAGCTTTTCAAAACAGTGA

ATTACTGTCACCTTGATGGACAAGTTTCAATAAACTTTGTAAAAATAA

>NM\_001316327.2 Homo sapiens protein kinase C delta (PRKCD), transcript variant 3, mRNA  
AGTTCCCGTTTCCGAAACTGAGAACTGAGCCGCGGTCAGCGAAAGTCCCGCCGCGCCGAGACCTGCCGG  
TCTGCAGGGAAGTGGCCAGGCAAGGGGGCAGGCCCCGTTTCTCCTGGTGGTGGTGC GTTGTAGCAGCAGC  
GGGAGCCAGGACTAAGGACAAGCAGGAGCTGGGAGCCCCAGCCCCACTGCAGGCCCCACCATGGCGCCGT  
TCCTGCGCATCGCCTTCAACTCCTATGAGCTGGGCTCCCTGCAGGCCGAGGACGAGGCGAACCAGCCCTT  
CTGTGCCGTGAAGATGAAGGAGGCGCTCAGCACAGAGCGTGGGAAAACACTGGTGCAGAAGAAGCCGACC  
ATGTATCCTGAGTGGAAGTCGACGTTGATGCCACATCTATGAGGGGCGCGTCATCCAGATTGTGCTAA  
TGCGGGCAGCAGAGGAGCCAGTGTCTGAGGTGACCGTGGGTGTGTCGGTGCTGGCCGAGCGCTGCAAGAA  
GAACAATGGCAAGGCTGAGTTCTGGCTGGACCTGCAGCCTCAGGCCAAGGTGTTGATGTCTGTTCAGTAT  
TTCCTGGAGGACGTGGATTGCAAACAGTCTATGCGCAGTGAGGACGAGGCCAAGTTCCCAACGATGAACC  
GCCGCGGAGCCATCAAACAGGCCAAAATCCACTACATCAAGAACCATGAGTTTATCGCCACCTTCTTTGG  
GCAACCCACCTTCTGTTCTGTGTGCAAAGACTTTGTCTGGGGCCTCAACAAGCAAGGCTACAAATGCAGG  
CAATGTAACGCTGCCATCCACAAGAAATGCATCGACAAGATCATCGGCAGATGCACTGGCACCGCGGCCA  
ACAGCCGGGACACTATATTCCAGAAAGAACGCTTCAACATCGACATGCCGCACCGCTTCAAGGTTCAAA  
CTACATGAGCCCCACCTTCTGTGACCACTGCGGCAGCCTGCTCTGGGGACTGGTGAAGCAGGGATTAAAG  
TGTGAAGACTGCGGCATGAATGTGCACCATAAATGCCGGGAGAAGGTGGCCAACCTCTGCGGCATCAACC  
AGAAGCTTTTGGCTGAGGCCTTGAACCAAGTCACCCAGAGAGCCTCCCGGAGATCAGACTCAGCCTCCTC  
AGAGCCTGTTGGGATATATCAGGGTTTCGAGAAGAAGACCGGAGTTGCTGGGGAGGACATGCAAGACAAC  
AGTGGGACCTACGGCAAGATCTGGGAGGGCAGCAGCAAGTGCAACATCAACAACCTTCATCTTCCACAAGG  
TCCTGGGCAAAGGCAGCTTCGGGAAGGTGCTGCTTGGAGAGCTGAAGGGCAGAGGAGAGTACTTTGCCAT  
CAAGGCCCTCAAGAAGGATGTGGTCTGATCGACGACGACGTGGAGTGCACCATGGTTGAGAAGCGGGTG

CTGACACTTGCCGCAGAGAATCCCTTTCTCACCCACCTCATCTGCACCTTCCAGACCAAGGACCACCTGT  
TCTTTGTGATGGAGTTCCTCAACGGGGGGGACCTGATGTACCACATCCAGGACAAAGGCCGCTTTGAACT  
CTACCGTGCCACGTTTTATGCCGCTGAGATAATGTGTGGACTGCAGTTTCTACACAGCAAGGGCATCATT  
TACAGGGACCTCAAACCTGGACAATGTGCTGCTGGACCGGGATGGCCACATCAAGATTGCCGACTTTGGGA  
TGTGCAAAGAGAACATATTGCGGGAGAGCCGGGGCCAGCACCTTCTGCGGCACCCCTGACTATATCGCCCC  
TGAGATCCTACAGGGCCTGAAGTACACATTCTCTGTGGACTGGTGGTCTTTCGGGGTCCTTCTGTACGAG  
ATGCTCATTGGCCAGTCCCCCTTCCATGGTGATGATGAGGATGAACTCTTCGAGTCCATCCGTGTGGACA  
CGCCACATTATCCCCGCTGGATCACCAAGGAGTCCAAGGACATCCTGGAGAAGCTCTTTGAAAGGGAACC  
AACCAAGAGGCTGGGAGTGACCGGAAACATCAAATCCACCCCTTCTTCAAGACCATAAACTGGACTCTG  
CTGGAAAAGCGGAGGTTGGAGCCACCTTTCAGGCCCAAAGTGAAGTCACCCAGAGACTACAGTAACTTTG  
ACCAGGAGTTCCTGAACGAGAAGGCGCGCCTCTCCTACAGCGACAAGAACCTCATCGACTCCATGGACCA  
GTCTGCATTCGCTGGCTTCTCCTTTGTGAACCCCAAATTCGAGCACCTCCTGGAAGATTGAGGTTCTGG  
ACAGATCAGGCTAGCCCTGCCCTCCACCCACACCTGCCCCGCTCCCCACGATAAGCACCAAGTGGGACTGTG  
GTGACTTCTGCTGCTGGCCCCGCCCTGCCCCCAGAGCGTCCTTGGCTGCCGTCTGGCCGGGCTCTCATG  
GTACTTCCTCTGTGAACTGTGTGTGAATCTGCTTTTCCTCTGCCTTCGGAGGGAAATTGTAAATCCTGTG  
TTTCATTACTTGAATGTAGTTATCTATTGAAAATATATATTATATACATAGACATATATATATATAAT  
AGGCTGTATATATTGCTCAGTAGAGAAAAACCATGGGGGACTGGTGATATGTTGATCTTTTTCAAAAAA  
TATATATATGACAAAAAAAAAAAAAAAAAAGGAGCACAAAGCTGTTTGAACCACCAGGTTTATTTGTGTGTCTA  
AATAAACACCAAATAGTACCAA

>NM\_004562.3 Homo sapiens parkin RBR E3 ubiquitin protein ligase (PRKN), transcript variant 1, mRNA

AGGATTTAACCCAGGAGAGCCGCTGGTGGGAGGCGCGCTGGCGCCGCTGCGCGCATGGGCCTGTTCTCTG  
GCCCCGAGCCGCCACCTACCCAGTGACCATGATAGTGTTTGTGAGGTTCAACTCCAGCCATGGTTTCCCA

GTGGAGGTCGATTCTGACACCAGCATCTTCAGCTCAAGGAGGTGGTTGCTAAGCGACAGGGGGTTCCGG  
CTGACCAGTTGCGTGTGATTTTCGCAGGGAAGGAGCTGAGGAATGACTGGACTGTGCAGAATTGTGACCT  
GGATCAGCAGAGCATTGTTACATTGTGCAGAGACCGTGGAGAAAAGGTCAAGAAATGAATGCAACTGGA  
GGCGACGACCCCAGAAACGCGGCGGGAGGCTGTGAGCGGGAGCCCCAGAGCTTGACTCGGGTGGACCTCA  
GCAGCTCAGTCCTCCCAGGAGACTCTGTGGGGCTGGCTGTCATTCTGCACACTGACAGCAGGAAGGACTC  
ACCACCAGCTGGAAGTCCAGCAGGTAGATCAATCTACAACAGCTTTTATGTGTATTGCAAAGGCCCTGT  
CAAAGAGTGCAGCCGGGAAAACCTCAGGGTACAGTGCAGCACCTGCAGGCAGGCAACGCTCACCTTGACCC  
AGGGTCCATCTTGCTGGGATGATGTTTTAATTCAAACCGGATGAGTGGTGAATGCCAATCCCCACACTG  
CCCTGGGACTAGTGCAGAATTTTCTTTAAATGTGGAGCACACCCACCTCTGACAAGGAAACATCAGTA  
GCTTTGCACCTGATCGCAACAAATAGTCGGAACATCACTTGCAATTACGTGCACAGACGTCAGGAGCCCCG  
TCCTGGTTTTCCAGTGCAACTCCCGCCACGTGATTTGCTTAGACTGTTTCCACTTATACTGTGTGACAAG  
ACTCAATGATCGGCAGTTTGTTACGACCCTCAACTTGGCTACTCCCTGCCTTGTGTGGCTGGCTGTCCC  
AACTCCTTGATTAAAGAGCTCCATCACTTCAGGATTCTGGGAGAAGAGCAGTACAACCGGTACCAGCAGT  
ATGGTGCAGAGGAGTGTGTCCTGCAGATGGGGGGCGTGTTATGCCCCGCCCTGGCTGTGGAGCGGGGCT  
GCTGCCGGAGCCTGACCAGAGGAAAGTCACCTGCGAAGGGGGCAATGGCCTGGGCTGTGGGTTTGCCTTC  
TGCCGGGAATGTAAAGAAGCGTACCATGAAGGGGAGTGCAGTGCCGTATTTGAAGCCTCAGGAACAATA  
CTCAGGCCTACAGAGTCGATGAAAGAGCCGCCGAGCAGGCTCGTTGGGAAGCAGCCTCCAAAGAAACCAT  
CAAGAAAACCAACCAAGCCCTGTCCCCGCTGCCATGTACCAGTGGAAAAAATGGAGGCTGCATGCACATG  
AAGTGTCCGCAGCCCCAGTGCAGGCTCGAGTGGTGCTGGAACCTGTGGCTGCGAGTGGAACCGCGTCTGCA  
TGGGGGACCACTGGTTCGACGTGTAGCCAGGGCGGGCGGGCGCCCCATCGCCACATCCTGGGGGAGCATA  
CCCAGTGTCTACCTTCATTTTCTAATTCTCTTTTCAAACACACACACACGCGCGCGCGCGCACACACA  
CTCTTCAAGTTTTTTTCAAAGTCCAACTACAGCCAAATTGCAGAAGAACTCCTGGATCCCTTTCACTAT  
GTCCATGAAAAACAGCAGAGTAAAATTACAGAAGAAGCTCCTGAATCCCTTTAGTTTGTCCACACAAGA  
CAGCAGAGCCATCTGCGACACCACCAACAGGCGTTCTCAGCCTCCGGATGACACAAATACCAGAGCACAG  
ATTCAAGTGCAATCCATGTATCTGTATGGGTCACTCTCACCTGAATTCGAGACAGGCAGAATCAGTAGCT

GGAGAGAGAGTTCTCACATTTAATATCCTGCCTTTTACCTTCAGTAAACACCATGAAGATGCCATTGACA  
AGGTGTTTCTCTGTAAAATGAACTGCAGTGGGTTCTCCAACTAGATTCATGGCTTTAACAGTAATGTTC  
TTATTTAAATTTTCAGAAAGCATCTATTCCCAAAGAACCCCAGGCAATAGTCAAAAACATTTGTTTATCC  
TTAAGAATTCCATCTATATAAATCGCATTAAATGAAATACCAACTATGCGTAAATCAACTTGTCACAAAGT  
GAGAAATTATGAAAGTTAATTTGAATGTTGAATGTTTGAATTACAGGGAAGAAATCAAGTTAATGTACTT  
TCATTCCCTTTCATGATTTGCAACTTTAGAAAGAAATTGTTTTCTGAAAGTATCACCAAAAAATCTATA  
GTTTGATTCTGAGTATTCATTTGCAACTTGGAGATTTTGCTAATACATTTGGCTCCACTGTAAATTTAA  
TAGATAAAGTGCCTATAAAGGAAACACGTTTAGAAATGATTTCAAATGATATTCAATCTTAACAAAAGT  
GAACATTATTAAATCAGAATCTTTAAAGAGGAGCCTTCCAGAACTACCAAAATGAAGACACGCCCGACT  
CTCTCCATCAGAAGGGTTTATACCCCTTTGGCACACCCTCTCTGTCCAATCTGCAAGTCCCAGGGAGCTC  
TGCATACCAGGGGTTCCCCAGGAGAGACCTTCTCTTAGGACAGTAACTCACTAGAATATTCCTTATGTT  
GACATGGATTGGATTTCAGTTCAATCAAACCTTCAGCTTTTTTTTCAGCCATTACACAACAATCAAAAG  
ATTAACAACACTGCATGCGGCAAACCGCATGCTCTTACCCACACTACGCAGAAGAGAAAGTACAACCACT  
ATCTTTTGTCTACCTGTATTGTCTGACTTCTCAGGAAGATCGTGAACATAACTGAGGGCATGAGTCTCA  
CTAGCACATGGAGGCCCTTTTGGATTTAGAGACTGTAAATTATTAAATCGGCAACAGGGCTTCTCTTTT  
AGATGTAGCACTGAAATCCTTGCTGGAGGGAAGAGAGGGGATGAACTCAAGTTTTCCACATCCTGGGACA  
CCTGTCCCTCTTTTCTAACTGCCTAAGATAACCCATTTCTTCCAACCATCTGAGGACAGTCCCGTCGTC  
TCAGAGGCCCTGCACCGGGGAGAGACTGGGCTCTGCAGCAGCCACATCAGCATTACAGCTTCATGTGGC  
TTCAGTGTCTGAAAATCTACCGACTCCAACATGGCCCCACGGTGACAACAGACCTGTGACAGGAAGCCCA  
AAGCTCACATAGAAATGGTGGACAGATCAAAGTCTCTATAGTAAGGGAAAAAAGAGAGGTGGCAGGCAT  
GAGCCCCCTGCACCCAGTGGCTCGTGTCATACTGAGTCCAGACCCTGATCAAGGCCTGACTTAGTGTCA  
CTGGCAGTCCCACTAAATTACACTTCCTTACACTGGCCCGATGCGACAAATCAGGTGGCTCCCTTCTGTC  
ACGTGGAGCACACAGTGTTTTCCATCATCCATAGCTTTCTTCTGATGGTGTGTTGCATTATTGCGCCTTC  
CCAATCTGCATGCTGCGTTGGGCTTGCAGTGCCTGAACAAGGTTTGCTCCCATGAGCTCAGGCACCCTAG  
GATCCCCTGTTAGACTATTAGGCTGTCCAGCATGGTCTCCTTCCCTTCTTGGTGGTGGTCTTTTCCCTT

TCCAGAATAGAACAGTGATTCTTAAAATAAGTTAGAGCAGGCCGGGCGCGGTGGCTCATGCCTGTAATCC  
CAGCACTTTGGGAGGCCGAGGTGGGTGGATCACGAGGTCAGGAGTTCAAGACCAGCCTGGCCAAGATGAT  
GAAACCCCGTCTCTATTAAAAATACAAAAATTAGCTGGGCGTGGTGGCAGGCACCTGTAATCCCAGCTTC  
CTGGGAGGCTGAGGCAGGAGAATCACTTGAACCCGGGGGGCAGAGGTTGCAGTGAGCCGAGATCACGCCA  
CTGAACTCCAGCCTGGGCAACAGAGTGAGACTCTGTCTCAAAAAAAAAAAAAAAAAACAAAAACAAAAAAGC  
AAGATCATCCACTACACATGAACATGAATCACAGTATTATTTGCACAGGAAGGGTGTAACAAAATATGAA  
TGTATCAAAAAATAGAAATAAAGTCTTTGCAGAAAAAGTCTGTTTTCTCTGAAGTGTTGAGATTATC  
TGACAACTCTAAGATTGTAATTGTCATAAAGCATCAAAAGAG

>NM\_000314.8 Homo sapiens phosphatase and tensin homolog (PTEN), transcript variant 1, mRNA

GTTCTCTCTCTCGGAAGCTGCAGCCATGATGGAAGTTTGAGAGTTGAGCCGCTGTGAGGCGAGGCCGGG  
CTCAGGCGAGGGAGATGAGAGACGGCGGCGGCCGCGGCCGAGCCCCTCTCAGCGCCTGTGAGCAGCCG  
CGGGGGCAGCGCCCTCGGGGAGCCGGCCGGCCTGCGGCGGCGGCAGCGGCGGCGTTTCTCGCCTCTCTT  
CGTCTTTTCTAACCGTGCAGCCTCTTCTCGGCTTCTCCTGAAAGGGAAGGTGGAAGCCGTGGGCTCGGG  
CGGGAGCCGGCTGAGGCGCGGCGGCGGCGGCGGCACCTCCCGCTCCTGGAGCGGGGGGGAGAAGCGGGCGG  
CGGCGGCGGCCGCGGCGGCTGCAGCTCCAGGGAGGGGGTCTGAGTCGCCTGTCACCATTTCAGGGGCTGG  
GAACGCCGGAGAGTTGGTCTCTCCCTTCTACTGCCTCCAACACGGCGGCGGCGGCGGCTGGCACATCCA  
GGGACCCGGGCGGTTTTAAACCTCCCGTGCGCCGCCGCCGACCCCCGTGGCCCGGGCTCCGGAGGCC  
GCCGGCGGAGGCAGCCGTTTCGGAGGATTATTCGTCTTCTCCCATTCGCTGCCGCCGCTGCCAGGCCTC  
TGGCTGCTGAGGAGAAGCAGGCCAGTCGCTGCAACCATCCAGCAGCCGCCGAGCAGCCATTACCCGGC  
TGCGGTCCAGAGCCAAGCGGCGGCAGAGCGAGGGGCATCAGCTACCGCCAAGTCCAGAGCCATTTCATC  
CTGCAGAAGAAGCCCCGCCACCAGCAGCTTCTGCCATCTCTCTCCTTTTTCTTCAGCCACAGGCTCC  
CAGACATGACAGCCATCATCAAAGAGATCGTTAGCAGAAACAAAAGGAGATATCAAGAGGATGGATTCTGA

CTTAGACTTGACCTATATTTATCCAAACATTATTGCTATGGGATTCCTGCAGAAAGACTTGAAGGCGTA  
TACAGGAACAATATTGATGATGTAGTAAGGTTTTTGGATTCAAAGCATAAAAACCATTACAAGATATACA  
ATCTTTGTGCTGAAAGACATTATGACACCGCCAAATTTAATTGCAGAGTTGCACAATATCCTTTTGAAGA  
CCATAACCCACCACAGCTAGAACTTATCAAACCCTTTTGTGAAGATCTTGACCAATGGCTAAGTGAAGAT  
GACAATCATGTTGCAGCAATTCAGTGTAAAGCTGGAAAGGGACGAACTGGTGTAAATGATATGTGCATATT  
TATTACATCGGGGCAAATTTTTAAAGGCACAAGAGGCCCTAGATTTCTATGGGGAAGTAAGGACCAGAGA  
CAAAAAGGGAGTAACTATTCCCAGTCAGAGGCGCTATGTGTATTATTATAGCTACCTGTTAAAGAATCAT  
CTGGATTATAGACCAGTGGCACTGTTGTTTCACAAGATGATGTTTGAACTATTCCAATGTTCACTGGCG  
GAACTTGCAATCCTCAGTTTGTGGTCTGCCAGCTAAAGGTGAAGATATATCCTCCAATTCAGGACCCAC  
ACGACGGGAAGACAAGTTCATGTACTTTGAGTTCCTCAGCCGTTACCTGTGTGTGGTGATATCAAAGTA  
GAGTTCTTCCACAAACAGAACAAGATGCTAAAAAAGGACAAAATGTTTCACTTTTGGGTAAATACATTCT  
TCATACCAGGACCAGAGGAAACCTCAGAAAAAGTAGAAAATGGAAGTCTATGTGATCAAGAAATCGATAG  
CATTTGCAGTATAGAGCGTGCAGATAATGACAAGGAATATCTAGTACTTACTTTAACAAAAAATGATCTT  
GACAAAGCAAATAAAGACAAAGCCAACCGATACTTTTCTCAAATTTTAAGGTGAAGCTGTACTTCACAA  
AAACAGTAGAGGAGCCGTCAAATCCAGAGGCTAGCAGTTCAACTTCTGTAACACCAGATGTTAGTGACAA  
TGAACCTGATCATTATAGATATTCTGACACCACTGACTCTGATCCAGAGAATGAACCTTTTGATGAAGAT  
CAGCATACACAAATTACAAAAGTCTGAATTTTTTTTTATCAAGAGGGATAAAACACCATGAAAATAAACT  
TGAATAAACTGAAAATGGACCTTTTTTTTTTAAATGGCAATAGGACATTGTGTCAGATTACCAGTTATAG  
GAACAATTCTCTTTTCTGACCAATCTTGTTTTACCCTATACATCCACAGGGTTTTGACACTTGTTGTCC  
AGTTGAAAAAAGGTTGTGTAGCTGTGTCATGTATATACCTTTTGTGTCAAAGGACATTTAAATTCAA  
TTAGGATTAATAAAGATGGCACTTTCCCGTTTTATTCCAGTTTTATAAAAAGTGGAGACAGACTGATGTG  
TATACGTAGGAATTTTTCTTTTGTGTTCTGTCACCAACTGAAGTGGCTAAAGAGCTTTGTGATATACT  
GGTTCACATCCTACCCCTTTGCACTTGTTGGCAACAGATAAGTTTGCAGTTGGCTAAGAGAGGTTTCCGAA  
GGGTTTTGCTACATTCTAATGCATGTATTCGGGTAGGGGAATGGAGGGAATGCTCAGAAAGGAAATAAT  
TTTATGCTGGACTCTGGACCATATACCATCTCCAGCTATTTACACACACCTTTCTTTAGCATGCTACAGT

TATTAATCTGGACATTCGAGGAATTGGCCGCTGTCACTGCTTGTTGTTTGCGCATTTTTTTTTTAAAGCAT  
ATTGGTGCTAGAAAAGGCAGCTAAAGGAAGTGAATCTGTATTGGGGTACAGGAATGAACCTTCTGCAACA  
TCTTAAGATCCACAAATGAAGGGATATAAAAATAATGTCATAGGTAAGAAACACAGCAACAATGACTTAA  
CCATATAAATGTGGAGGCTATCAACAAAGAATGGGCTTGAAACATTATAAAAATTGACAATGATTTATTA  
AATATGTTTTCTCAATTGTAACGACTTCTCCATCTCCTGTGTAATCAAGGCCAGTGCTAAAATTCAGATG  
CTGTTAGTACCTACATCAGTCAACAACCTTACACTTATTTTACTAGTTTTCAATCATAATACCTGCTGTGG  
ATGCTTCATGTGCTGCCTGCAAGCTTCTTTTTTCTCATTAAATATAAAATATTTTGTAATGCTGCACAGA  
AATTTTCAATTTGAGATTCTACAGTAAGCGTTTTTTTTCTTTGAAGATTTATGATGCACTTATTCAATAG  
CTGTCAGCCGTTCCACCCTTTTGACCTTACACATTCTATTACAATGAATTTTGCAGTTTTGCACATTTTT  
TAAATGTCATTAACCTGTTAGGGAATTTTACTTGAATACTGAATACATATAATGTTTATATTA AAAAGGAC  
ATTTGTGTTAAAAAGGAAATTAGAGTTGCAGTAACTTTCAATGCTGCACACAAAAAAAAGACATTTGAT  
TTTTCAGTAGAAATTGTCCTACATGTGCTTTATTGATTGCTATTGAAAGAATAGGGTTTTTTTTTTTTT  
TTTTTTTTTTTTTTTTTAAATGTGCAGTGTTGAATCATTTCTTCATAGTGCTCCCCGAGTTGGGACTAGG  
GCTTCAATTTCACTTCTTAAAAAAAATCATCATATATTTGATATGCCCAGACTGCATACGATTTTAAGCG  
GAGTACAACCTACTATTGTAAAGCTAATGTGAAGATATTATTA AAAAGGTTTTTTTTTCCAGAAATTTGGT  
GTCTTCAAATTATACCTTCACCTTGACATTTGAATATCCAGCCATTTTGTTTCTTAATGGTATAAAATTC  
CATTTTCAATAACTTATTGGTGCTGAAATTGTTCACTAGCTGTGGTCTGACCTAGTTAATTTACAAATAC  
AGATTGAATAGGACCTACTAGAGCAGCATTTATAGAGTTTGATGGCAAATAGATTAGGCAGAACTTCATC  
TAAAATATTCTTAGTAAATAATGTTGACACGTTTTCCATACCTTGTCAGTTTCATTCAACAATTTTTAAA  
TTTTTAACAAAGCTCTTAGGATTTACACATTTATATTTAAACATTGATATATAGAGTATTGATTGATTGC  
TCATAAGTTAAATTGGTAAAGTTAGAGACAACCTATTCTAACACCTCACCATTGAAATTTATATGCCACCT  
TGTCTTTCATAAAAGCTGAAAATTGTTACCTAAAATGAAAATCAACTTCATGTTTTGAAGATAGTTATAA  
ATATTGTTCTTTGTTACAATTTGCGGCACCGCATATTA AACGTAACCTTATTGTTCCAATATGTAACAT  
GGAGGGCCAGGTCATAAATAATGACATTATAATGGGCTTTTGCACTGTTATTATTTTTCTTTGGAATGT  
GAAGGTCTGAATGAGGGTTTTGATTTGAATGTTTCAATGTTTTTGAGAAGCCTTGCTTACATTTTATGG

TGTAGTCATTGGAAATGGAAAAATGGCATTATATATATTATATATATAAATATATATTATACATACTCTC  
CTTACTTTATTTTCAGTTACCATCCCCATAGAATTTGACAAGAATTGCTATGACTGAAAGGTTTTTCGAGTC  
CTAATTA AAACTTTATTTATGGCAGTATTCATAATTAGCCTGAAATGCATTCTGTAGGTAATCTCTGAGT  
TTCTGGAATATTTTCTTAGACTTTTTGGATGTGCAGCAGCTTACATGTCTGAAGTTACTTGAAGGCATCA  
CTTTTAAGAAAGCTTACAGTTGGGCCCTGTACCATCCCAAGTCCTTTGTAGCTCCTCTTGAACATGTTTG  
CCATACTTTTAAAAGGGTAGTTGAATAAATAGCATCACCATTCTTTGCTGTGGCACAGGTTATAAACTTA  
AGTGGAGTTTACCGGCAGCATCAAATGTTTCAGCTTTAAAAAATAAAAGTAGGGTACAAGTTTAATGTTT  
AGTTCTAGAAATTTTGTGCAATATGTTCATAACGATGGCTGTGGTTGCCACAAAGTGCCTCGTTTACCTT  
TAAATACTGTTAATGTGTCATGCATGCAGATGGAAGGGGTGGAAGTGTGCACTAAAGTGGGGGCTTTAAC  
TGTAGTATTTGGCAGAGTTGCCTTCTACCTGCCAGTTCAAAAGTTCAACCTGTTTTCATATAGAATATAT  
ATACTAAAAAATTTAGTCTGTAAACAGCCTTACTCTGATTGAGCCTCTTCAGATACTCTTGTGCTGTG  
CAGCAGTGGCTCTGTGTGTAAATGCTATGCACTGAGGATACACAAAAATACCAATATGATGTGTACAGGA  
TAATGCCTCATCCCAATCAGATGTCCATTTGTTATTGTGTTTGTAAACAACCTTTATCTCTTAGTGTTA  
TAACTCCACTTAAAGTCTCATTCTGTGATTGTGTGGGTGTTTTATTAAATGAGAGTTT  
ATAATTCAAATTGCTTAAGTCCATTGAAGTTTTAATTAATGGGCAGCCAAATGTGAATACAAAGTTTTCA  
GTTTTTTTTTTTCTGCTGTCCTTCAAAGCCTACTGTTTAAAAAAAAAAAAAAAAAAAAACATGGCCTGA  
GAGTAGAGTATCTGTCTACTCATGTTTAATTAAGGAAAAACACTTATTTTTAGGGCTTTAGTCATCACTT  
CATAAATTGTATAAGCACATTAAATAGCGTTCTAGTCCTGAAAAAGTCCAAGATTCTTAGAAAATTGTGC  
ATATTTTTATTATGACAGATGTTTGAAGATAATCCCCAGAATGGATTTGATACTTTAGATTTCATTTT  
GTGGCTTTTGTCTATTATTCTGTACTCTGCCATCAGCATATGGAAAGCTTCATTTACTCATCATGACTTG  
TGCCATATAAAAATTGATATTTCGGAATAGTCTAAAGGACTTTTTGTACTTGAATTTAATCATGTTGTTT  
CTAATATTCTTAAAGCTTGAAGACTAAAGCATATCCTTTCAACAAAGCATAGTAAGGTAATAAGAAAGT  
GTAGTTTGTACAAGTGTTAAAAAATAAAGTAGACAATGTTACAGTGGGACTTATTATTTCAAGTTTACA  
TTTTCTCCATGTAATTTTTTAAAAAGTAAATGAAAAATGTGCAATAATGTAAATATGAAGTGTATGTG  
TACACACATTTTATTTTTCGGTATCTTGGGTATACGTATGGTTGAAAACATACTGGAGTCTAAAAGTAT

TCTAATTTATAAGAAGACATTTTGGTGATGTTTGAAAAATAGAAATGTGCTAGTTTTGTTTTATATCAT  
GTCCTTTGTACGTTGTAATATGAGCTGGCTTGGTTCAGTAAATGCCATCACCATTTCCATTGAGAATTTA  
AAACTCACCAGTGTTTAATATGCAGGCTTCCAAAGGCTTATGAAAAAATCAAGACCCTTAAATCTAGTT  
AATTTGCTGCTAACATGAAACTCTTTGGTTCTTTTATTTTGCCAGATAATTAGACACACATCTAAAGCT  
TAGTCTTAAATGGCTTAAGTGTAGCTATTGATTAGTGCTGTTGCTAGTTCAGAAAGAAATGTTTGTGAAT  
GGAAACAAGAATATTCAGTCCAACTGTTGTAAGGACAGTACCTGAAAACCAGGAAACAGGATAATGGAA  
AAAGTCTTTTAAAGATGAAATGTTGGAGCCAACCTTCTTATAGAATTAATTGTATGTGGCTATAGAAAGC  
CTAATGATTGTTGCTTATTTTTGAGAGCATATTATTCTTTTATGACCATAATCTTGCTGTTTTTCCATCT  
TCCAAAAGATCTTCCTTCTAATATGTATATCAGAATGTGGGTAGCCAGTCAGACAAATTCATATTGGTTG  
GTAGCTTTAAAAAGTTTGTAAATGTGAAGACAGGAAAGGACAAAATAGTTTGCTTTGGTGGTAGTACTCTG  
GTTGTTAAGCTAGGTATTTTGAGACTACTTCCCCATCACAACAACAATAAAATAATCACTCATAATCCTA  
TCACCTGGAGACATAGCCATCGTTAATATGTTAGTGACTATACAATCATGTTTTCTTCTGTATATCCATG  
TATATTCTTTAAAAATGAAATTTATACTGTACCTGATCTCAAAGCTTTTGTAGCTTAGTATATCTGTCATG  
AATTTGTAGGATGTTCCATTGCATCAGAAAACGGACAGTGATTTGATTACTTTCTAATGCCACAGATGCA  
GATTACATGTAGTTATTGAGAATCCTTTGAATTCAGTGGCTTAATCATGAATGTCTAAATATTGTTGAC  
ATTAGGATGATACATGTAAATTAAGTTACATTTGTTTAGCATAGACAAGCTTAACATTGTAGATGTTTC  
TCTTCAAAAATCATCTTAAACATTTGCATTTGGAATTGTGTTAAATAGAATGTGTGAAACACTGTATTAG  
TAAACTTCATCACCTTTCTACTTCCTTATAGTTTGAACTTTTAGTTTTGTAGTTCCCAAACAGTTGCT  
CAATTTAGAGCAAATTAATTTAACACCTGCCAAAAAAGGCTGCTGTTGGCTTATCAGTTGTCTTTAAAT  
TCAAATGCTCATGTGACTTTTATCACATCAAAAAATATTTTATTAATGATTCACCTTTAGCTCTGAAAAT  
TACCGCGTTTAGTAATTATAGTGGGCTTATAAAAAACATGCAACTCTTTTTGATAGTTATTTGAGAATTTT  
GGTGAAAAATATTTAGCTGAGGGCAGTATAGAAGCTTATAAACCAATATATTGATATTTTTAAACATTTT  
TACATATAAGTAAACTGCCATCTTTGAGCATAACTACATTTAAAAATAAAGCTGCATATTTTTAAATCAA  
GTGTTTAACAAGAATTTATATTTTTATTTTTTAAAATTAATAAATTTATATTTCTCTGTTGCATGA  
GGATTCTCATCTGTGCTTATAATGGTTAGAGATTTTATTTGTGTGGAATGAAGTGAGGCTGTAGTCATG

GTTCTAGTGTTTCAGTTTGCCAAGTCTGTTTACTGCAGTGAAATTCATCAAATGTTTCAGTGTGGTTTTTC  
TGTAGCCTATCATTTACTGGCTATTTTTTTATGTACACCTTTAGGATTTTCTGCCTACTCTATCCAGTTG  
TCCAAATGATATCCTACATTTTACAAATGCCCTTTCAGTTTCTATTTTCTTTTCCATTAAATTGCCCTC  
ATGTCCTAATGTGCAGTTTGTAAGTGTGTGTGTGTGTGTCTGTGTGTGTGTGAATTTGATTTTCAAGAGT  
GCTAGACTTCCAATTTGAGAGATTAAATAATTTAATTCAGGCAAACATTTTTCATTGGAATTTACAGTT  
CATTGTAATGAAAATGTTAATCCTGGATGACCTTTGACATACAGTAATGAATCTTGGATATTAATGAATT  
TGTTAGTAGCATCTTGATGTGTGTTTTAATGAGTTATTTCAAAGTTGTGCATTAAACCAAAGTTGGCAT  
ACTGGAAGTGTATATCAAGTTCCATTTGGCTACTGATGGACAAAAAATAGAAATGCCTTCCTATGGAG  
AGTATTTTCTTTAAAAAATTAATAAGGTTAATTATTTGACTA

>NM\_001256358.2 Homo sapiens protein tyrosine kinase 6 (PTK6), transcript variant 2, mRNA

ACGCCCAGCTCTGGGTGCTCCAGCTGGGCCACAGCCTGGTCTGCCGCTGCGCCCGCCGCCATGGTGTC  
CCGGGACCAGGCTCACCTGGGCCCCAAGTATGTGGGCCTCTGGGACTTCAAGTCCCGGACGGACGAGGAG  
CTGAGCTTCGCGCGGGGGACGTCTTCACGTGGCCAGGAAGGAGGAGCAGTGGTGGTGGGCCACGCTGC  
TGGACGAGGCGGGTGGGGCCGTGGCCCAGGGCTATGTGCCCCACAACCTACCTGGCCGAGAGGGAGACGGT  
GGAGTCGGAACCTGCGGGACACGCAGGCTGTGCGGCACTACAAGATCTGGCGGCGTGCCGGGGGCGCGCT  
GCACCTGAACGAGGCGGTGTCCTTCCTCAGCCTGCCCGAGCTTGTGAACTACCACAGGGCCCAGAGCCTG  
TCCCACGGCCTGCGGCTGGCCGCGCCCTGCCGGAAGCACGAGCCTGAGCCCCTGCCCCATTGGGATGACT  
GGGAGAGGCCGAGGGAGGAGTTCACGCTCTGCAGGAAGCTGGGGTCCGGCTACTTTGGGGAGGTCTTCGA  
GGGGCTCTGGAAGACCGGGTCCAGGTGGCCATTAAGGTGATTTCTCGAGACAACCTCCTGCACCAGCAG  
ATGCTGCAGTCGGAGATCCAGGCCATGAAGAAGCTGCGGCACAAACACATCCTGGCGCTGTACGCCGTGG  
TGTCCGTGGGGGACCCCGTGACATCATCACGGAGCTCATGGCCAAGGGCAGCCTGCTGGAGCTGCTCCG  
CGACTCTGATGAGAAAGTCTGCCCGTTTCGGAGCTGCTGGACATCGCCTGGCAGGTGGCTGAGGGCATG

TGTTACCTGGAGTCGCAGAATTACATCCACCGGGACCTGGCCGCCAGGAACATCCTCGTCGGGGAAAACA  
CCCTCTGCAAAGTTGGGGACTTCGGGTTAGCCAGGCTTATCAAGGAGGACGTCTACCTCTCCATGACCA  
CAATATCCCCTACAAGTGGACGGCCCCTGAAGCGCTCTCCCGAGGCCATTACTCCACCAAATCCGACGTC  
TGGTCCTTTGGGATTCTCCTGCATGAGATGTTTCAGCAGGGGTCAGGTGCCCTACCCAGGCATGTCCAACC  
ATGAGGCCTTCCTGAGGGTGGACGCCGGCTACCGCATGCCCTGCCCTCTGGAGTGCCCGCCCAGCGTGCA  
CAAGCTGATGCTGACATGCTGGTGCAGGGACCCCGAGCAGAGACCCTGCTTCAAGGCCCTGCGGGAGAGG  
CTCTCCAGCTTCACCAGCTACGAGAACCCGACCTGAGCTGCTGTGGAGCGGGCATGGCCGGGGCCCTGCTG  
AGGAGGGGGCCTGGGCAGAGGGCCTGGACCTGGGATCAAGGCCACGCGCTTCCCTGGGGTTTACTGAGGT  
GATGGGTGCAGGAAAGGTTACAAATGTGGAGTGTCTGCGTCCAATACACGCGTGTGCTCCTCTCCTTAC  
TCCATCGTGTGTGCCTTGGGTCTCAGCTGCTGACACGCAGCCTGCTCTGGAGCCTGCAGATGAGATCCGG  
GAGACTGACACGAAGCCAGCAGAGGTCAGAGGGGACTCTGACCACAGCCCGCTCTCTGGCTGTCTGTCTG  
CAGTGCCCGGCTGAGGGTGGGAGGCAAACACGCCTTGTTCTGCTCTTCCAGTTCAGCTTGGTGGGAGA  
AAGTCATTCGCGTGGCTCGGGACGCTCATGTAAATTTGGTTTTGGTGCTCAAGGGTTCTTCTCCAGG  
GGCAGGTGTTTCTTCTGTTTGTCTTGTGTCTTGAGAGCTTGGCCTTATGACCAGTGAGAACTCTCTCC  
CTGGTCTCTGCCAGCCCAAGCATCACTGCCCCGAGGCGCCAGCTCAGTTTCACCGTCCACGTCCACAAGGG  
GCTTTTCCACCTTCACCTTGTGCTGGGTGAGTGTGGAAGCGCCCCCTCACTCCTGCGCTGACAAGG  
GCCCTTCTCTACTGTCTGTGGGGTGGTTCCGGGCTGGGGGGGCTGCCTCCTTGCACCTGATTTTGAAGG  
TGTCTCTTTCATCCATGGTTAAGTCATAAAAAGCTTATTGGTTTTGGTTTTGACTCACCTGAAAGTTTTT  
TTGGTTTAAAAGAAGAATAGGCGGGGCACGGTGGCTCATGCCTGTAATCCCAGCACTTTGGGAGGCTGAG  
GCAGGTGGATCACGAGGTCAGGAGATCGACACCATCCTGGCTAACACGGTGAAACCCCGTCTCTACTAAA  
AAATACAAAAAATTAGCTGGGTGTGGTGGTGGGGTGGGCGCCTGTAGTCCCAGCTACGTGGGAGGCTGA  
GGCAGCAGACTGGTGTGAACCCGGGAGGTGGAGCTTGCAGTGAGCCGAGATCGCGCCACTGCACTCCAGC  
CTGGGCGACAGAGCGAGACTCCATCTCAAAAAAAAAAAAAAAAAAAGAAAGAAAGAAAAATAATTTTGG  
GAGTTTCTGGAAAGGTACTAGGATTTCTCAAAGGATTTGTCTTCTGCCTTGTGAAAGACAGATGTCAGA  
CTAATCAGGCTTATCCGATGTGCTACATGAGATGGAAAGCGTGTGAAATAGTAAGTCACACTAAGTCTTC

TGGAGGTTCTATTTACGGGTTTGGTTTTGATATGAATGTTGCAGAACTCTATAAAATTCCTAGAAATCT  
GATACGTTATCCTATGATATATATCCTATCTCACATGCTATTCCTAGAAATCTGGTGCAATGTTATCAGT  
CATAATTTTGGTTATTACATTAATAATGCTGCATGCCACAGAAATAACCAAGTTTCCTTGCCAACCGTGTC  
ACGAATATAATAAACTCTCATCAGATCCTGA

>NM\_001206836.2 Homo sapiens RAB11A, member RAS oncogene family (RAB11A), transcript variant 2,  
mRNA

AGTTGAAGCTCGGCGCTCGGGTTACCCCTGCAGCGACGCCCCCTGGTCCCACAGATACCACTGCTGCTCC  
CGCCCTTTCGCTCCTCGGCCGCGCAATGGGCACCCGCGACGACGAGTACGACTACCTCTTTAAAGTTGTC  
CTTATTGGAGATTCTGGTGTGGAAAGAGTAATCTCCTGTCTCGATTTACTCGAAATGAGTTTAATCTGG  
AAAGCAAGAGCACCATTGGAGTAGAGTTTGCAACAAGAAGCATCCAGGTTGATGGAAAAACAATAAAGGC  
ACAGATATGGGACACAGCAGGGCAAGAGCGATATCGAGCTATAACATCAGCATATTATCGTGGAGCTGTA  
GGTGCCTTATTGGTTTATGACATTGCTAAACATCTCACATATGAAAATGTAGAGCGATGGCTGAAAGAAC  
TGAGAGATCATGCTGATAGTAACATTGTTATCATGCTTGTGGGCAATAAGAGTGATCTACGTCATCTCAG  
GGCAGTTCCTACAGATGAAGCAAGAGCTTTTGCAGAAAAGAATGAAGCAAATGTCAGACAGACGCGAAAA  
TGACATGTCTCCAAGCAACAATGTGGTTCCTATTCATGTTCCACCAACCACTGAAAACAAGCCAAAGGTG  
CAGTGCTGTCAGAACATCTAAGGCATTTCTTCTCCCCTAGAAGGCTGTGTATAGTCCATTTCCAGGT  
CTGAGATTTAAATATATTTGTAATTCTTGTCACCTTTTGTTTTATTACTTCATACTTATGAATTTTT  
CCATGTCCTAAGTCTTTTGATTTAGCTTTATAAAATCATCCACTTGTCCGAATGACTGCAGCTTTTTT  
TCATGCTATGGCTTCACTAGCCTTAGTTTAATAAACTGAATGTTTGGATTCTCAGTTATTGTTTACTTT  
TCATCATGGAAGCCTGTCACTGTATGTAGGACATAATAGAACTTGATCACTTGAAGCTCAGACCTATTGG  
TCTTGATCAAATCAAATAAGAAGACCTTAGAAATAAGCTACCATTTTGCCACAGAGCAGCTTATAGGTA  
ATACACTCTTCTCTCAGTGCAGTGTACATTTCCACAAATCTAAGAATTGCCCTATAAACATAGCAGGATT  
TTGAGAGCTTGAAAATTTCCATTATTCTGGACATGAATTTCTAAAATGCCTTAATAGGTTTATGTAGTT

GAGTAAATTTTGT TTTTAAATTTTGT AAGCATCAAAGTTGATTAGAGAGGGGGGCACTTTTCTGGAGA  
ATTCTCTTAGTAAACACAAAAGATTGTTACGGTTTCATTAGTAGTATGGTTGTGGGGCCATAAGTTAAAC  
AGTGCTGCCTGGTAGGCTGGGAACTGAAGAGACTTGTGGTATTCCATCTCGGGTGCCTCTGTTGGCAATG  
ATCAGGCAGCCCCAAAAGATTTAAATGATCTATAATAATTTCCAAGCGGTAGATTATGTGGCATT TTATTG  
CTCAGGCAATAATTGGTTTAATGCTGGTAGTGTCAAATTTTGAAGTGTTAATTTTGTCTTAGAACCTTCC  
AGTAAGTGAAATACAACCTAGTTTTATCACCATATCCACCAGCAGGCATGGATAATTATTTTAACAATGC  
TAATATTTGAGTTTTGCAGTATATTATAGAATATAGTCCAGTTAAATCTTTGGTTTCAGTATGTCTGAAG  
AGTACAGTGAGAGGTTAATTTCTGCTCAAGTGGTACCACTTAAAGGCATGTATTCTTTTAGTATGTAAAA  
TGAAATAGTACCTTGAGTTTAAATAGAATGCATTTAGGCATTGTAGAGATCTGAAATAGTTTTCTTCCAC  
TACATTGTTGAAATCAATGAAGCAATTAGTTTCTCATT CAGAAATGTGCACACTAATATTTAGTTTTGCT  
TTCTCGTGGATAATATTAAGCACTTACTCTGCAGTTTCTGGAAGTTGTGTCAACTGCAGTGATACTATT  
CAGGATGGTGGGAAATCCCCAAAAATATGTATGTGTGGGCTTGCTTAGATTACTATATTTCATAGTTAAT  
CTTTGTCTCTTGCGGTGCTCATGATGTGTGGGGCACACGGAAGGCATTGCTGTAGTCAGTCATTTTGGT  
TTTCTTCTATAGCCATTTTATTATTTTAGTGTATTAGTTATGAAGATAATATTATCTATTTGTAAATTGC  
TACTTTGTATTTTATGCATGCTCTGTAATTTGATTTTTTTTTTAGTTATTGATTGGATTATATTCACATT  
CTAATAAACAGTTATAGGGGGATTATTTCTTATGCTGTCAGATTACATTTTCTTTGAGTGCTTTGGGT  
GCAGCCGTGGAATCCTGATGTAAAAGCATAGGTTCTTGCATTACTGAGTAAACATTGAATTGGGAGCATC  
AGTGTGTGAATTCAGCTTTGATTTTAGAACTGCAGTTCAATTATGCTTTCCTTGAAAAAGTATGTCCAA  
AAACATTAGGAAAGTAGTGTGTATTTTCATATATAACAGTGTCAACCAGACCCAGGAAAAGAAACCATCTC  
TATTTTATTGAAAGTTGGTGGTAGATTTTTTACAAAGTAAGGAGAAAAGAGAAAACTAAATAGTGAATT  
GAAAATGAATAAAGTAACTTAGAATTTTTACCCAAGTGTAGACTTAAATGTTGCTTTGAGTATGGCTGG  
ATCTTGGGAGAATTCCAGGAAATATTAGGTATTAGAAAATGACTTTGATTGCATTCAGCAGGTGTCTTT  
ATTCTGAGTAGTATCTTAGGAGACAACTGTCTCAAGCAAGAAACAATAAATTTTAAATATTATGACAG  
TTCAGGGCTTAAGGCAGTTTAGAAGTATTTTGCTACTTGACCTTGATTTTCAGTTATTTAACTTTGAAT  
TTTTTTTTTTTTTTTGTAGACGGAGTCTTGCTCTGTTGCCAGGCTGGAGTACAATGGCACCATCTCAGC

TCACTGCAAGCTCCACCTCCAGGGTTCATGCCATTCTCCTGCCTCAGCCTCCCGAGTAGCTGGGATTATA  
GGCGCCAGCCACCACGACTGGCTAATTTTTGTATTTTAGTAGAGACGGGGTTTCACCATGTTAGCCAG  
GGTGGTCTCGATCTCCTGACCTGGTGATACCCACCTCGGCCTCCCAAAGTGCTGGGATTAAAGGCGTG  
AGCCACCGTGCCTGGCCTTGAATTTTTTTTAACTGTTATATAGTCTCCTGAATAGTTAGCCATGGTGC  
CTTGATTTAATCTTATGTCATTGTTCTCAAATGCCATGATTTCTCTTAATAGTAGTTGTCATTATGTAA  
GGGTAAGTTATTGCCATTTAATTGTAATTATAAGAAGAGGTGCCAGCTAGTGACCTTACATCAGTGATC  
TTTTAAGTTCTGAAGGGTCTGCAGAAAAGTTACACTTCTTGAGTTTGGGTGCCCATCAGAGCTGGTCA  
CATTTCTTTGATCATTGAAAAATGAATATCTTAATTTTTGTCTTTGCTGACTGGTATTTATAAAATACA  
AATGCTTTTAGTGGGTTGAGCTGTTGTGATAATCTCTCCATCTACCTTAGAGAAGAAGCTGTACTATTT  
AGACAGTTTTGGCCAACACTAGAAGCAAAAGAATTCAAAGGCTGGGTGGATATTTAAGAACTTATTCTAA  
CCTGTCAGGTTTCAATTTGTGGGGCTTGGTTAACAGAGGAAAAAATATAAATTGATTTTCTGATGTCT  
CACAAATATCACATACCTGGAAAAAATTAACAAAAAATGAATTTTGTAAGGTTATGTATGACTTC  
CATTTGCTCTGTAAAAAATGAACAAAGATTGTGAAAGGATCCTCTCCACCACATCATTTAATGGGTTA  
GCGGAACAGATAGGGAGCTATGACACTAGCACCAAAGAGAGATTTTCTCTGGTTGGGTGGTGTCTGGTG  
CCACGCCCTTTCTGGGATTTGACAAGTCTTCCCACTCACCTATACAATATGCCAAATCAACTGGAGTT  
GTCATTCTAATGTTTTAAAGAATGATTGGGTTCCCCCAACTGTAGGAGGTCGATGGTAACAATAAAGTG  
ATACAAAATGCTTATGTCATTATAATTTATGTAAGGGAGACCATTAGGCTGAGAATCAATATGATTGAGG  
TTATCTATTCTCCTGAAAAGTGAATTGGAGAATAAAGAAAGAATATTTGAAAGGATGTTGTGTACTAGGC  
AATATACTAGCATGTATTAGAAAATACGGTAACTGTGGGTAGAAAGAGTGAAAGTAGCTGGTATGATAG  
AGCACTGGACTGAGTAACGAAGAGATTCTAGTCATGGCTCTTGTGGTCATTTTATTTTGTAGCCTCACAT  
TCTTCCAATTAATGAGGGTACCAGATTAAATAAACTCTGGGGATTCATCCCAATTCGAACTCTGTAATTC  
TCTGAATGAACTCTCTTCAATTAAGCCAAATTATTAACATTTTAACTCAAGTTTAAATTTAATAGAG  
AAGTCAAAATGAGGTATGCACTTTGTGGAATGTTTTGGTCTTATCACAATAACCTGATTAAAATGGTGC  
CTTTATTTCCATGTTTACTCCTTTAAATAAGATGAAAGCTTTCAGAACATTTATTTGCAAAATGACTGTC  
AATATCAACAATATGCATCAAAGTACCATATATGCTAAGGGAGAGGAGCACTTGATGGGCTGCTATGTTA

ACTGTAAATTGAGAACTGCTTGTTTTATGGCTTTTGCTGTTAAAAAACTGCTGGCTTTTAATATGTA  
CTTTAAATATACTCATGTCTGGGAGAGAACTTTTAAAAA

>NM\_004161.5 Homo sapiens RAB1A, member RAS oncogene family (RAB1A), transcript variant 1,  
mRNA

ATTTTGGGTGGAAGCGATAGCTGAGTGGCGGCGGCTGCTGATTGTGTTCTAGGGGACGGAGTAGGGGAAG  
ACGTTTGCTCTCCCGAACAGCCTATCTCATTCTTTCTTCGATTACCCGTGGCGCGGAGAGTCAGGGC  
GGCGGCTGCGGCAGCAAGGGCGGCGGTGGCGGCGGCGGCAGCTGCAGTGACATGTCCAGCATGAATCCCG  
AATATGATTATTTATTCAAGTTACTTCTGATTGGCGACTCAGGGGTTGGAAAGTCTTGCCTTCTTCTAG  
GTTTGCAGATGATACATATACAGAAAGCTACATCAGCACAATTGGTGTGGATTTCAAAATAAGAACTATA  
GAGTTAGACGGGAAAACAATCAAGCTTCAAATATGGGACACAGCAGGCCAGGAAAGATTTCGAACAAATCA  
CCTCCAGTTATTACAGAGGAGCCCATGGCATCATAGTTGTGTATGATGTGACAGATCAGGAGTCCTTCAA  
TAATGTTAAACAGTGGCTGCAGGAAATAGATCGTTATGCCAGTGAAAATGTCAACAAATTGTTGGTAGGG  
AACAAATGTGATCTGACCACAAAGAAAGTAGTAGACTACACAACAGCGAAGGAATTTGCTGATTCCCTTG  
GAATTCCGTTTTTTGGAAACCAGTGCTAAGAATGCAACGAATGTAGAACAGTCTTTCATGACGATGGCAGC  
TGAGATTAAAAAGCGAATGGGTCCCGGAGCAACAGCTGGTGGTGTGAGAAGTCCAATGTTAAATTCAG  
AGCACTCCAGTCAAGCAGTCAGGTGGAGGTTGCTGCTAAAATTTGCCTCCATCCTTTTCTCACAGCAATG  
AATTTGCAATCTGAACCCAAGTGAAAAACAAAATTGCCTGAATTGTAAGTGTATGTAGCTGCACTACAAC  
AGATTCTTACCGTCTCCACAAAGGTCAGAGATTGTAAATGGTCAATACTGACTTTTTTTTTATTCCCTTG  
ACTCAAGACAGCTAACTTCATTTTCAGAACTGTTTTAAACCTTTGTGTGCTGGTTTATAAAATAATGTGT  
GTAATCCTTGTTGCTTTCCTGATACCAGACTGTTTCCCGTGGTTGGTTAGAATATATTTGTTTTGATGT  
TTATATTGGCATGTTTAGATGTCAGGTTTAGTCTTCTGAAGATGAAGTTCAGCCATTTTGTATCAAACAG  
CACAAGCAGTGTCTGTCACTTCCATGCATAAAGTTTAGTGAGATGTTATATGTAAGATCTGATTTGCTA  
GTTCTTCCTGTAGAGTTATAAATGGAAAGATTACACTATCTGATTAATAGTTTCTTCATACTCTGCATA

TAATTTGTGGCTGCAGAATATTGTAATTTGTTGCACACTATGTAACAAAACAACCTGAAGATATGTTTAAT  
AAATATTGTACTTATTGGAAGTAATATCAAACCTGTATGGTGATAAGTATTGTTTTGATTCTTATGGTTAA  
AGGGAAATAGAGCCTTGCATTATATTCAACACAGCCATTTGTGTGTGCACAATGCAAACCTAAGGTATTCT  
AGACCTATCTTAGAGCAGCATCCAGTATTTGCTTTCTAGATAATATGCCCAATAACATGACCTAGAGGGG  
CTTCTGTGCTGTGTAGGGATTAAACCAACTTCAGTGGTTCAGGGAGCTCAAACCTATATGTAAAAACAAGTT  
TAGAATGTATGCTATCTAGCCCGTTATCTCTGATCCTTCTCTAAAACCATTTGAAATAGCTTCATTGATC  
AACATTTCAATAATGCATCTGTGGTAGAGGTAGAAAGCAGCACCTTTCCTAATTGGCAAATGATCAGACT  
AATGTGTGCTAATGTTTTTCTCCATGCTTTCAGTCAGATTCAACTATTTTATCCTCCACAGTTGCTTAA  
CTTGGTGTGGAGGAGGGTTTAAGCATTAAAGATAGGAAGCAGGAAATTTGATTGCTCTAAATTTAGAAAT  
TATATCCCTAAAAATTAACATGAATACTGGGTGGTAATGATAATTGAGGCAAATGTATTTATTTTGGT  
GACATTTTGCATATATGAAGATTTTCTGAAATAGGACCTTCAAGATCCTAGGGGGTTTTGTTTGGTTTTT  
AATTGTGAGGAATAAAAAATCTTCTGCCACACTGGCATTTTAAGGTGACTGAGGTCAAACGTTGTTTCC  
TTAGGTTGAAATAGCAGCCAAAACATTCTTCACGCAGGGGCTTGGGATATGGCTGCTGGCAACACATTTT  
GTTGTGGGCTCCTTAATTTAATGATAAAATTTAAGCTAAACACAAGCCAAAAATGAATAGGTTTTTTTAA  
TTTTTATTTTCACTAAACAGGCAATTGAAATACATGGTACAAAAATAAGTGGTAAGATAATTGTAAAT  
GAAATGGACAGAATATTCAATTTTCCATCTATGAAAATTTACAATAAAAAATCATAGTTTACTTTGTA

>NM\_130781.4 Homo sapiens RAB24, member RAS oncogene family (RAB24), transcript variant 2,  
mRNA

CTCTAGCCCCCTCCCGCGGGAGTCGCGGCGCTGCGGGTAGGAGCCGGGTTGCGGGAGACCCCAGGTTTCGG  
TTGGGATTCCCAGCCAGAACGGAGCTTAAGCCGGGCAGGCGAGCGAATGACGGAGTAGCGAGCTGCACGG  
CGGCGTGCTGCGCTGTTGAGGACGCTGTCCCGCGCGCTCCAGGCCGCCCCGAGGCTTGGGGTCTTCGAA  
GGATAATCGGCGCCCCGGGGCCGAACAGCGGGGCGACACGGGGCGCTGCCGAAGTGCAAGGCCACGGCCAG  
AGCTCGAGCCCGACGCGCTGTCTGGAGTCGTAGGACCCTGACGTGGCTGAAGCGGCCCCGGGAGCATGAG

CGGGCAGCGCGTGGACGTCAAGGTGGTGTATGCTGGGCAAGGAGTACGTGGGCAAGACTAGCCTGGTGGAG  
CGCTACGTGCACGACCGCTTTCTGGTGGGGCCTTATCAGAACACCATCGGGGCCGCTTCGTGGCCAAGG  
TGATGTCGGTCGGAGACCGGACTGTGACATTAGGTATTTGGGACACAGCAGGCTCTGAGCGCTATGAGGC  
CATGAGTAGAATCTACTATCGGGGTGCCAAGGCTGCCATCGTCTGCTATGACCTCACAGACAGCAGCAGC  
TTTGAGCGAGCAAAGTTCTGGGTGAAGGAACTGCGCAGCCTAGAGGAGGGCTGCCAAATCTACTTATGTG  
GCACCAAGAGTGACCTGCTGGAAGAAGACCGGAGGCGTCGACGTGTGGACTTCCACGACGTCCAGGACTA  
TGCAGACAATATCAAAGCTCAGCTCTTTGAAACATCCAGCAAGACAGGCCAGAGTGTGGACGAGCTCTTC  
CAGAAAGTGGCAGAGGATTACGTCAGTGTGGCTGCCTTCCAGGTGATGACAGAGGACAAGGGCGTGGATC  
TGGGCCAGAAGCCAAACCCCTACTTCTACAGCTGTTGTCACTGAGTCAGCACTCACCTGGCCTGGGG  
GAATTAAAGGAATTCCCCGTAAGGGCTGGACCCAGCTCCTTTCTGGGCTTGGGTAGTCAAATGTCTGAGC  
TACCCAGGTCCTCATGTCAGCAGAGTGGCGCCTGCCTGTGCTGGCCCATGGAACGGAGACAGCATTGGG  
CTGACTGTGGGCATGAGGAGGGATAAGGCTGATTTGGACCCAGGCTTCTGCCCTGGACAGCACTTGTGT  
CTGCAGATTATTTAAGTGGCTTTTGATCTGTAAATAAAATCAGTGCACTGTGCATCACACCCAGCCCCTT  
TCCCTGCTGTGTGGATTAGGTGTCAAGACACCTAGTTCTTCTGGGGCCACCCGGCTGGCCTCACTGCTT  
ATATTAAGGCTCCTCCCAACTCTCATTTTCCTTTGGAAAACAAGACTTTTTTCCCATGGTTACCGCTGA  
GATACTGGGGCTGTAGTAGTATAAAAGCTCACAGTTCCTTCTGAGTGCTGAAAAGAGTGCATGAGTTGCT  
TCGAAATAAAAGGGTCAAGCATTCTACCTGA

>NM\_031296.3 Homo sapiens RAB33B, member RAS oncogene family (RAB33B), mRNA

GCTCTTGCGGTGGCGTAATCTCTCAGCCTTTCTGTGTCTCCTTCTCCGCTCAGTTTGGGGCGGGTCG  
GGGGAATGGCTGAGGAGATGGAGTCGTCGCTCGAGGCAAGCTTTTCGTCCAGCGGGGCAGTGTGAGGGC  
CTCAGGGTTTTTGCCTCCTGCCCCTCCCGCATCTTCAAGATAATCGTGATCGGCGACTCCAATGTGGGC  
AAGACATGCCTGACCTACCGCTTCTGCGCTGGCCGCTTCCCCGACCGCACCGAGGCCACGATAGGGGTGG

ATTTCGAGAACGAGCGGTGGAGATTGATGGGGAGCGCATCAAGATCCAGCTATGGGACACAGCAGGACA  
AGAACGATTAGAAAGAGCATGGTTCAGCACTACTACAGAAATGTACATGCTGTTGTCTTCGTGTATGAT  
ATGACCAACATGGCTAGTTTTATAGCCTACCATCTTGGATAGAAGAATGCAAACAACATTTGCTAGCCA  
ATGATATACCACGGATTCTTGTGGAAATAAATGTGACTTGAGAAGTGCCATACAGGTACCCACAGACTT  
GGCACAAAAATTTGCTGACACACACAGTATGCCTTTGTTTGAAACGTCTGCTAAAAACCCCAATGATAAT  
GACCATGTGGAAGCTATATTTATGACCTTGGCTCATAAGCTTAAGAGCCACAAACCATTAATGCTTAGTC  
AGCCCCCTGATAATGGAATTATCCTGAAGCCTGAACCAAAGCCTGCAATGACGTGCTGGTGCTAAATAAC  
AGTCTTTATTATATTATCTAATTTTGACTAAAGAAATACTTTTGAAGTATGACAGTATTAAGTCATAAGA  
TTTAATCTCAACTATAATGGGTCATCTTGACACTTTGCTGTTTGTTCATTGTCACGCTTTTGTATTTTGT  
TCTACTTAAGTTTGTCACTGTGACAACACAGGAAAAGTTGGTTTTTCAGGTGAGATTGAAAATGAAGCAAA  
GATAGGATGAATCTGAACATCTCTCCATCTAGAGCCCAATGAAGGAAGCTTCAAATGAGAACATGATGGA  
ATCAGTAACCATTCAATCTTTTGTCTAGGATTGGAAAAAATGTTAAAGGTTTAGGACACACCTAATAG  
TATGTCCTTTGAATGGGAAGTGTTCTTAATAGGATAAAAACTGGTATTTGCCTCTCCCAGAGTACTTTT  
TTTGTTTTTTCATAGAGACGGGGTCTTGCTATGTTGTCCAGGCTGGCCTTGAGCTCCTGGGCTCAAGCAA  
TCCTCCACCTCAGCCTCCCAGTACTGGGACTGTAGGTACTCACCCTGCATCTGGCCTTTCTTTGTTT  
TATTAACATATTTAGTTTTGTTATTATTGGTATGTTTTAGAGCCAAGACTTTAGTTCCAGTGGGATAAGA  
AGGCATAGAATGTTTTCTGGTCCCAGTCCATAAAGAATGACTTTTCCAAGAGTTCTAGATGTTTGATTT  
TCTAATTAATACTTATCAGATCTACAAAAATCATTATTATTTTAAAAGAGTTATTTGAGTTTCTTTCTTT  
CTTTTTTTTTTTTTTTTTTTTTTGGAGATGGAGTCTCGCTCTGTCTCCAGGCTGGAGTGCAGTGGCGTCATC  
TCGGCTCACTGCAACCTCCGCCTCCCAGGTTCAAGTGATTCTCCTGCCTCAGCCTCCCGAGTAGCTGGGA  
TTACAGGCGTGCACTACCACACCCAGCTGATTTTTGTATTTTATAGTATAGATGGGGTTTTACCATGTTGG  
CCAGGATGGTCTCGATCTCTTGACCTCATGATCCACCCGCCTCAGCTTCCCAAAGTGCTGGGATTACAGG  
TGTGAGTCACTGCACCCAGCCGAGTTGCTTTCTTACTAAATCCTATTAATAATATGCAAAAATAAGTCAGA  
TTTTAAGGCAAATAAAGTGACATAAGGTGCTTTATATTTTATTTTGGTATATTTAAACAGTGAAAACTA  
ACTGAAAGCACATGAAGAGTTGTAACCTGGGGGAAAATAGGTAAACATAGCTTCTAGCTAACACAGGAGA

CCTATTCTTAGCCTTTACTAATTTCAAGCAGTGTATCCCATATGGTATCTCTTGCTCTTCCTTCAACTCC  
AATAAATTTAATGACTAAATGCCAAGTTAACAAATCAACTTCCATTTGGATTGTAGGTGTGAAGGCACAA  
CTCTAATTGCTATTAGTCTACATGTATTTCTGTAATAGTATTGTGTCATATCAATTTTAAAGATGTCTAA  
ATTTTATGGTCACAAGTTATCCCTCCTCAGTATGAAAAATAAATTAGATATTGAAAAATGTCTAACTTC  
AGTGATGGAAAGAATATTTCAAGAAGTTTTTAACTAAATACTTTATTTTGAATTTAAGTCTTGCAC  
ATAAAATATAGCAAGCTTACATATTAACTATTTACGTAAATGGAATGTAAGCCATGACTTTAACTGAAG  
TGTTACATTCACTAATTTTGATAGATTGCTGTCCTTAATAATTTTGGAGGAAATTAAGCCAAATGATTA  
TTGTACTACAGTATTTTCAGAATATGGGAAATCAATTAATAATGTAATCTAATCTAGTTTAAGATTTTG  
TTAATCATCATGGTGGTCCTACCTGGATAATTTAACTATAAAGACAAAGTAATTCTATTAAATGAAC  
ACTGAAAATAATAATTATAGGAAGTGATTATTCCATTTTAAGTATTAGAGCTCAAATTGGCTTTATTG  
ATTTAGGGAGATCATGTTTTCTTAATCATGCTGGAATTTAAAAATTGTTTTACTTGTATCGAAATTAACC  
TTGATTTATAACTATTTTTGTAATAAAACAATGACAGCTGTAGTAACTATGATGGGTGTAACAACATTTT  
TTAAAGAAGGGAATCTGTTTATCGCTTTTCAAATATTTTCTAAAGTGGGGGAAGAAAGTTATAGACT  
TTCCAAGCACATTTATGGTTTTTTATTACTATTATTATGGTTTTAAAAAGAGTAACTTTATTTCTTTTG  
TAAGGAATTAAGTAATATCCTTTACAGTTCTGTGAAAGGACTTATTTTTTAACTGTAATATTTATTAGTT  
TTAAATATTTGTATCTCATTTGTAACAATTTGTTTTAATTTTTATATATATGTTTTATTTTTAAAA  
ACATACCAGTTGAATGGGGTTAAAGCTTTCAATATCTTAAATATTTATAAAACATTTCACTGTTGCAAA  
ATCACTTCCAAATGATAGCTATCTAACAATAATTACTAATTTTTAAAGAACAAATCACACATTTAAAA  
AATCTGTAGAATTTATTTTAACTATGACCTTTAATTGAAAATAAATAATTAAATATCAGACATGTTTTG  
GAAAAGTCTTAATTTGAGAACACCAAAGGAAACTACCCAGAATCTAATGTAGTTCGCTATTAATAACAA  
TGCATTATTGAAAGTATATTGCAAATACATGTTTCCTCATGAAATCTAAGTAATTTGTTGTGGAATAGT  
GTCAGTTACATTTCCCCATGAAGTTCAATAAACCAGCTTAGCCACAAAGAAATTGTGTTTTATTTTC  
TTTGTTTGGTTACTGGGTAGAGTATAAAATAAAACAATCTTTTTTCTCCTGGTTTCCAGATAATATTA  
TATATATGATACACTTTTGAAAACAACAAAAAGCCCCAACCCATTGGACAATTATTTTCTGTATACAT  
TTGAGGTCAAAGAACAACCTTCAGGAAAAAACTCAACAAAGTATTAATAATTAGCTGATAACACAGCTTTTG

TATTTGTGTGTTTTAGTAATCCAGCTTGTTTTAGAATAGTTCAGTGCAAAAAGCAAATGGTGCAAGAGGA  
GTTGATGTGTATTTAGACGTAAAAGCATTTAACAGAATGAATAACTATAGAAAAGTATGAGAAAAGAGAAC  
GAACTACGTCTCAGGTATAAGATTGCAGTTACTGATTTAGACACCATAGGATTAGGGATGTGGGGGCCTC  
TGATGTTGATTCTGCTTCCCCTGGTCAGTTTATTTTACGTATAAGTTACCCTTGTTTCAAACACAAAAT  
TGACATTATTCATGAAGGACTGCTTCTTAATCAGATATTAAGAAGTTCGTCATGTATTTTGGGAGCACG  
TTTGCTACAGCCTGTGTGGCAAGGGCGAATGCACTTGTTTGTGGAATAACCTGATTTATCAAACATTT  
ATCAAGTATGGGTCATGTGTTCTCTATTTGTGTTAGTGGAGCTACATA

>NM\_004162.5 Homo sapiens RAB5A, member RAS oncogene family (RAB5A), transcript variant 1,  
mRNA

AGTTCGCTGCGTGCAGCGACGTGGCGGCGGGGCCGGCACCGGGCAGCGGAAGTGGCTCCGGCGGTGGGAC  
TTGAGTGTTTGTGTTTTGGTTCGTGAAGGAGCCGGCGGCTGGCCTTAGGGGAGGAGGCAGAGGGAGGAGG  
AGGAGGAAGAATTAGTCGGAAGTCCAGCGCCGGCGGCGGCGGCGGCGGCGGAGGAGGAGAAAGGAAAGAG  
GAAGGGGGAGCGGCGAGAGGCGGAGACGGAGCCCGACAGGGGCGGCACCGGCGGAGCCCCGCACAGT  
CCAGTGTGAGGGGAGCGGCGCTAAGAGCAGGCGACGCCGCCGCCACCACCACCGCCATAGATACT  
CTCATCTACGGGCCACGCCTGGGCCTTGCTGCCAGGAAGCTTCGGCCCCGCAGCTCGGCTTGCTGCGGT  
CTCAGGTTTCTTTACCTCCAGAAAGAAGAATATTGGCCCCTTGAATTCTGGAAGTTCATTGAAGAGTCTG  
AAATTAGGGACTTATTTCAAATTTGGACATGGCTAGTCGAGGCGCAACAAGACCCAACGGGCCAAATACG  
GGAAATAAAATATGCCAGTTCAAACTAGTACTTCTGGGAGAGTCCGCTGTTGGCAAATCAAGCCTAGTGC  
TTCGTTTTGTGAAAGGCCAATTCATGAATTTCAAGAGAGTACCATTGGGGCTGCTTTTCTAACCCAAAC  
TGTATGTCTTGATGACACTACAGTAAAGTTTGAAATATGGGATACAGCTGGTCAAGAACGATACCATAGC  
CTAGCACCAATGTACTACAGAGGAGCACAAGCAGCCATAGTTGTATATGATATCACAAATGAGGAGTCCT  
TTGCAAGAGCAAAAAATTGGGTAAAGAACTTCAGAGGCAAGCAAGTCCTAACATTGTAATAGCTTTATC

GGGAAACAAGGCCGACCTAGCAAATAAAAGAGCAGTAGATTTCCAGGAAGCACAGTCCTATGCAGATGAC  
AATAGTTTATTATTCATGGAGACATCCGCTAAAACATCAATGAATGTAAATGAAATATTCATGGCAATAG  
CTAAAAAATTGCCAAAGAATGAACCACAAAATCCAGGAGCAAATTCTGCCAGAGGAAGAGGAGTAGACCT  
TACCGAACCACACAACCAACCAGGAATCAGTGTTGTAGTAACTAAACCTCTAGTTTGAAGTAGCTGGAA  
TAGTCTTCTGCTTCTAAATGTTAATAACAATGGAATTGGAGCATTTAACAGCCCAGTATGACTTCCAA  
AAGAAGAGACTTATGATAGAGTCAAGTTTCTAATACAGAATTATTTTAAGTGTTTTGAAGTTAATTTTA  
ATAACATGCATGGGTCCCTCTCACTAATGTTTCAACAATAGGGAAAAATGAGAACTATGTGGACACTTGT  
TTCATTGGAAGGTTAGGGGGAATAATTTCTCATCACTAGGAATATAGACAAATGACTGTCTGGGCCACACA  
CAGTTAACAGCCCATTCTCCACACTGGTACAGTAGTCACCTGTGAAAAAAAAAATTGGAAGTTACTAAT  
TTGGGCTTTTCAAAAACATTCTTTGTTTAGAAGGAGATTCTAAAGTTATTTATGATGCTTAGCCATAGTA  
TTCAGGCAAATGTTCAATTTCTCTGGTACCTGTATTTAAAATGTACATTCCACATTTTAATAAATTAACC  
ACAAGAAAATAATCCCACATATACAAGGTCAGGGGTGGGGAAGAGTATTAATGGTATCTTAATTATACCC  
AGTCTGGTTTTTTTTTTTTTAAATGGGGTAAAAATCAAATGCAACCCCATCTTGTTTTAGGAATTTTGAGA  
ACTAATAAATGCACCTTAATGGTCAGTGTTCTTTCAAACATGTGAGTTCTTTAACAAAAATGAAATAAA  
CCAGGTGTCTGTGATTTCTAATTAATCACCGCTGGCCATTACACAGGTTTTGTTGTTGGGGTGGGGAGG  
GGGCTTTTGTTCCCTTTTGACATAATATAGTCAATGCACTAACAATTATGTATATTCAAAGTTGATTATT  
TTAAATTCGATCTTCAGCTGTACTGTAAATAGGGTACTGCATTGTAGTCTCCATATCTGTATTACTTTTC  
TGTAATATTTAAGAGTTGCTTAAAAGCATACAAAATGTACTGTTACTAAACAGCTAATTATTTCTCTCT  
CCCCCTTTGACAGGAAGGGGCTTCAGTTGTTCTCCATGGCTAGAACCATAATAAACAATGTACCCGTAA  
TTTGTAACATAAAGTATTGCAATATGTTAGTAACAATCTTGAGCCTTCCTTTCCAAAGTTCATTTTATT  
TTGATCAGTTCAGTATATTGCACTAATTATTTTAGGTATTTTCATTATATGAAAGCTACCATGTGTCAGA  
GATGATTTAATCTATTTAAGTGTTGGACTGCTAGGAGAACTTGTACATTTATGATAATGCAGAATTAGGA  
AAACGGTTCACCAGTGTTTAGTTTTATATTGAGGTGCTCAGGTTGGAATAAAGTGGTATAAAAAGCAA

>NM\_004637.6 Homo sapiens RAB7A, member RAS oncogene family (RAB7A), mRNA

AGTCTTGGCCATAAAGCCTGAGGCGGCGGCAGCGGCGGAGTTGGCGGCTTGGAGAGCTCGGGAGAGTTCC  
CTGGAACCAGAACTTGGACCTTCTCGCTTCTGTCTCCGTTTAGTCTCCTCCTCGGCGGGAGCCCTCGCG  
ACGCGCCCGGCCGAGCCCCCAGCGCAGCGGCCGCGTTTGAAGGATGACCTCTAGGAAGAAAGTGTTGC  
TGAAGGTTATCATCCTGGGAGATTCTGGAGTCGGGAAGACATCACTCATGAACCAGTATGTGAATAAGAA  
ATTGAGCAATCAGTACAAAGCCACAATAGGAGCTGACTTTCTGACCAAGGAGGTGATGGTGGATGACAGG  
CTAGTCACAATGCAGATATGGGACACAGCAGGACAGGAACGGTTCCAGTCTCTCGGTGTGGCCTTCTACA  
GAGGTGCAGACTGCTGCGTTCTGGTATTTGATGTGACTGCCCCAACACATTCAAAACCCTAGATAGCTG  
GAGAGATGAGTTTCTCATCCAGGCCAGTCCCCGAGATCCTGAAAACCTCCATTTGTTGTGTTGGGAAAC  
AAGATTGACCTCGAAAACAGACAAGTGCCACAAAGCGGGCACAGGCCTGGTGCTACAGCAAAAAACAACA  
TTCCCTACTTTGAGACCAGTGCCAAGGAGGCCATCAACGTGGAGCAGGCGTTCCAGACGATTGCACGGAA  
TGCACTTAAGCAGGAAACGGAGGTGGAGCTGTACAACGAATTCCTGAACCTATCAAACTGGACAAGAAT  
GACCGGGCCAAGGCCTCGGCAGAAAGCTGCAGTTGCTGAGGGGGCAGTGAGAGTTGAGCACAGAGTCCTT  
CACAAACCAAGAACACACGTAGGCCTTCAACACAATTCCCCTCTCCTCTTCCAAACAAAACATACATTGA  
TCTCTCACATCCAGCTGCCAAAAGAAAACCCCATCAAACACAGTTACACCCACATATCTCTCACACACA  
CACACACACGCACACACACACACAGATCTGACGTAATCAAACCTCAGCCCTTGCCCGTGATGGCTCCT  
TGGGGTCTGCCTGCCACCCACATGAGCCCGCGAGTATGGCAGCAGGACAAGCCAGCGGTGGAAGTCATT  
CTGATATGGAGTTGGCATTGGAAGCTTATTCTTTTGTTCAGTGGAGAGAGAGAGAACTGTTTACAGTTA  
ATCTGTGTCTAATTATCTGATTTTTTTTATTGGTCTTGTGGTCTTTTACCCCCCTTCCCTCCCTCC  
TTGAAGGCTACCCCTTGGAAGGCTGGTGCCCATGCCCCATTACAGGCTCACACCCAGTCTGATCAGGC  
TGAGTTTTGTATGTATCTATCTGTTAATGCTTGTTACTTTTAACTAATCAGATCTTTTACAGTATCCAT  
TTATTATGTAATGCTTCTTAGAAAAGAATCTTATAGTACATGTTAATATATGCAACCAATTAATGTAT  
AAATTAGTGTAAGAAATTCTTGATTATGTGTTAAGTCCTGTAATGCAGGCCTGTAAGGTGGAGGGTTG  
AACCCTGTTTGGATTGCAGAGTGTTACTCAGAATTGGGAAATCCAGCTAGCGGCAGTATTCTGTACAGTA

GACACAAGAATTATGTACGCCTTTTATCAAAGACTTAAGAGCCAAAAAGCTTTTCATCTCTCCAGGGGGA  
AAACTGTCTAGTTCCTTCTGTGTCTAAATTTCCAAAACGTTGATTTGCATAATACAGTGGTATGTGCA  
ATGGATAAATTGCCGTTATTTCAAAAATTAAATTTCTCATTTTCTTTCTTTTTTTTCCCCCTGCTCCAC  
ACTTCAAACTCCCGTTAGATCAGCATTCTACTACAAGAGTGAAAGGAAAACCCTAACAGATCTGTCCTA  
GTGATTTTACCTTTGTTCTAGAAGGCGCTCCTTTCAGGGTTGTGGTATTCTTAGGTTAGCGGAGCTTTTT  
CCTCTTTTCCCCACCCATCTCCCCAATATTGCCATTATTAATTAACCTCTTTCTTTGGTTGGAACCCTG  
GCAGTTCTGCTCCCTTCCTAGGATCTGCCCCTGCATTGTAGCTTGCTTAACGGAGCACTTCTCCTTTTTT  
CAAAGGTCTACATTCTAGGGTGTGGGCTGAGTTCTTCTGTAAAGAGATGAACGCAATGCCAATAAAATTG  
AACAAGAACAATGAT

>NM\_018890.4 Homo sapiens Rac family small GTPase 1 (RAC1), transcript variant Rac1b, mRNA  
CTGTTTCTCTGCAGTTTTCTCAGCTTTGGGTGGTGGCCGCTGCCGGGCATCGGCTTCCAGTCCGCGGAG  
GGCGAGGCGGCGTGGACAGCGGCCCCGGCACCCAGCGCCCCGCCGCCCGCAAGCCGCGCGCCCGTCCGCC  
GCGCCCCGAGCCCGCCGCTTCTATCTCAGCGCCCTGCCGCCGCCGCCGCGGCCAGCGAGCGGCCCTGA  
TGCAGGCCATCAAGTGTGTGGTGGTGGGAGACGGAGCTGTAGGTAAACTTGCCTACTGATCAGTTACAC  
AACCAATGCATTTCTGGAGAATATATCCCTACTGTCTTTGACAATTATTCTGCCAATGTTATGGTAGAT  
GGAAAACCGGTGAATCTGGGCTTATGGGATACAGCTGGACAAGAAGATTATGACAGATTACGCCCCCTAT  
CCTATCCGCAAACAGTTGGAGAAACGTACGGTAAGGATATAACCTCCCGGGGCAAAGACAAGCCGATTGC  
CGATGTGTTCTTAATTTGCTTTTCCCTTGTGAGTCCTGCATCATTTGAAAATGTCCGTGCAAAGTGGTAT  
CCTGAGGTGCGGCACCACTGTCCCAACACTCCCATCATCCTAGTGGGAACTAACTTGATCTTAGGGATG  
ATAAAGACACGATCGAGAAACTGAAGGAGAAGAAGCTGACTCCCATCACCTATCCGCAGGGTCTAGCCAT  
GGCTAAGGAGATTGGTGCTGTAAAATACCTGGAGTGCTCGGCGCTCACACAGCGAGGCCTCAAGACAGTG  
TTTGACGAAGCGATCCGAGCAGTCCTCTGCCCGCCTCCCGTGAAGAAGAGGAAGAGAAAATGCCTGCTGT

TGTAAATGTCTCAGCCCCTCGTTCTTGGTCCTGTCCCTTGGAACCTTTGTACGCTTTGCTCAAAAAAAAAA  
CAAAAAAAAAAAAAACAAAAAAAAAAAAACAACGGTGGAGCCTTCGCACTCAATGCCAACTTTTTGTTACAGA  
TTAATTTTTCCATAAAACCATTTTTTTGAACCAATCAGTAATTTTAAGGTTTTGTTTGTCTAAATGTAAG  
AGTTCAGACTCACATTCTATTAATAATTTAGCCCTAAAATGACAAGCCTTCTTAAAGCCTTATTTTTCAAA  
AGCGCCCCCCCCATTCTTGTTTCAGATTAAGAGTTGCCAAAATACCTTCTGAACTACACTGCATTGTTGTG  
CCGAGAACACCGAGCACTGAACTTTGCAAAGACCTTCGTCTTTGAGAAGACGGTAGCTTCTGCAGTTAGG  
AGGTGCAGACACTTGCTCTCCTATGTAGTTCTCAGATGCGTAAAGCAGAACAGCCTCCCGAATGAAGCGT  
TGCCATTGAACTCACCAGTGAGTTAGCAGCACGTGTTCCCGACATAACATTGTACTGTAATGGAGTGAGC  
GTAGCAGCTCAGCTCTTTGGATCAGTCTTTGTGATTTTCATAGCGAGTTTTCTGACCAGCTTTTGCGGAGA  
TTTTGAACAGAACTGCTATTTCTCTAATGAAGAATTCTGTTTAGCTGTGGGTGTGCCGGGTGGGGTGTG  
TGTGATCAAAGGACAAAGACAGTATTTTGACAAAATACGAAGTGGAGATTACACTACATTGTACAAGGA  
ATGAAAGTGTACGGGTAAAACTCTAAAAGGTTAATTTCTGTCAAATGCAGTAGATGATGAAAGAAAGG  
TTGGTATTATCAGGAAATGTTTTCTTAAGCTTTTCCTTCTTACACCTGCCATGCCTCCCCAAATTGG  
GCATTTAATTCATCTTTAACTGGTTGTTCTGTTAGTCGCTAACTTAGTAAGTGCTTTTCTTATAGAACC  
CCTTCTGACTGAGCAATATGCCTCCTTGTATTATAAAATCTTCTGATAATGCATTAGAAGGTTTTTTTG  
TCGATTAGTAAAAGTGCTTTCCATGTTACTTTATTCAGAGCTAATAAGTGCTTTCCTTAGTTTTCTAGTA  
ACTAGGTGTAAAATCATGTGTTGCAGCTTTATAGTTTTTAAAATATTTTAGATAATTCTTAACTATGA  
ACCTTCTTAACATCACTGTCTTGCCAGATTACCGACACTGTCACTTGACCAATACTGACCCTCTTTACCT  
CGCCACGCGGACACACGCCTCCTGTAGTCGCTTGCCTATTGATGTTTCTTTGGGTCTGTGAGGTTCTG  
TAACTGTGCTAGTGCTGACGATGTTCTGTACAACTTAACTCACTGGCGAGAATACAGCGTGGGACCCTT  
CAGCCACTACAACAGAATTTTTTAAATTGACAGTTGCAGAATTGTGGAGTGTTTTTACATTGATCTTTTG  
CTAATGCAATTAGCATTATGTTTTGCATGTATGACTTAATAAATCCTTGAATCATA

>NM\_006098.5 Homo sapiens receptor for activated C kinase 1 (RACK1), mRNA

CTCTCTTTCACTGCAAGGCGGCGGCAGGAGAGGTTGTGGTGCTAGTTTCTCTAAGCCATCCAGTGCCATC  
CTCGTCGCTGCAGCGACACACGCTCTCGCCGCCCATGACTGAGCAGATGACCTTCGTGGCACCTCA  
AGGGCCACAACGGCTGGGTAACCCAGATCGCTACTACCCCGCAGTTCCCGGACATGATCCTCTCCGCCTC  
TCGAGATAAGACCATCATCATGTGGAACTGACCAGGGATGAGACCAACTATGGAATTCACAGCGTGCT  
CTGCGGGGTCACTCCCACTTTGTTAGTGATGTGGTTATCTCCTCAGATGGCCAGTTTGCCCTCTCAGGCT  
CCTGGGATGGAACCCTGCGCCTCTGGGATCTCACAACGGGCACCACCACGAGGCGATTTGTGGGCCATAC  
CAAGGATGTGCTGAGTGTGGCCTTCTCCTCTGACAACGGGCAGATTGTCTCTGGATCTCGAGATAAAACC  
ATCAAGCTATGGAATACCCTGGGTGTGTGCAAATACACTGTCCAGGATGAGAGCCACTCAGAGTGGGTGT  
CTTGTGTCCGCTTCTCGCCCAACAGCAGCAACCCTATCATCGTCTCCTGTGGCTGGGACAAGCTGGTCAA  
GGTATGGAACCTGGCTAACTGCAAGCTGAAGACCAACCACATTGGCCACACAGGCTATCTGAACACGGTG  
ACTGTCTCTCCAGATGGATCCCTCTGTGCTTCTGGAGGCAAGGATGGCCAGGCCATGTTATGGGATCTCA  
ACGAAGGCAAACACCTTTACACGCTAGATGGTGGGGACATCATCAACGCCCTGTGCTTCAGCCCTAACCG  
CTACTGGCTGTGTGCTGCCACAGGCCCCAGCATCAAGATCTGGGATTTAGAGGGAAAGATCATTGTAGAT  
GAACTGAAGCAAGAAGTTATCAGTACCAGCAGCAAGGCAGAACCACCCCAGTGACCTCCCTGGCCTGGT  
CTGCTGATGGCCAGACTCTGTTTGCTGGCTACACGGACAACCTGGTGCGAGTGTGGCAGGTGACCATTGG  
CACACGCTAGAAGTTTATGGCAGAGCTTTACAAATAAAAAAAAAAACTGGCTTTTCTGACTTTTAGGTTTT  
TTTTTCTTATATGCAAAAAA

>NM\_002880.4 Homo sapiens Raf-1 proto-oncogene, serine/threonine kinase (RAF1), transcript variant 2, mRNA

AATCGCGGGCGCTTGGGCCGCCATCTTAGATGGCGGGAGTAAGAGGAAAACGATTGTGAGGCGGGAACGG  
CTTTCTGCTGCCTTTTTTGGGCCCGAAAAGGGTCAGCTGGCCGGGCTTTGGGGCGCGTGCCCTGAGGCG  
CGGAGCGCGTTTGCTACGATGCGGGGGCTGCTCGGGGCTCCGTCCCCTGGGCTGGGGACGCGCCGAATGT  
GACCGCCTCCCGCTCCCTACCCGCCGCGGGGAGGAGAGCGGGCGAGAAGCTGCCGCCGAACGACAGGA  
CGTTGGGGCGGCCTGGCTCCCTCAGGTTTAAGAATTGTTTAAGCTGCATCAATGGAGCACATACAGGGAG

CTTGGAAGACGATCAGCAATGGTTTTGGATTCAAAGATGCCGTGTTTGATGGCTCCAGCTGCATCTCTCC  
TACAATAGTTCAGCAGTTTGGCTATCAGCGCCGGGCATCAGATGATGGCAAACCTCACAGATCCTTCTAAG  
ACAAGCAACACTATCCGTGTTTTCTTGCCGAACAAGCAAAGAACAGTGGTCAATGTGCGAAATGGAATGA  
GCTTGATGACTGCCTTATGAAAGCACTCAAGGTGAGGGGCCTGCAACCAGAGTGCTGTGCAGTGTTGAG  
ACTTCTCCACGAACACAAAGGTAAAAAGCACGCTTAGATTGGAATACTGATGCTGCGTCTTTGATTGGA  
GAAGAACTTCAAGTAGATTTCTGGATCATGTTCCCTCACAACACACAACCTTGCTCGGAAGACGTTCC  
TGAAGCTTGCCTTCTGTGACATCTGTCAGAAATTCCTGCTCAATGGATTTGATGTCAGACTTGTGGCTA  
CAAATTCATGAGCACTGTAGCACCAAAGTACCTACTATGTGTGTGGACTGGAGTAACATCAGACAACCT  
TTATTGTTTCAAATTCCACTATTGGTGATAGTGGAGTCCCAGCACTACCTTCTTTGACTATGCGTCGTA  
TGCGAGAGTCTGTTTCCAGGATGCCTGTTAGTTCTCAGCACAGATATTCTACACCTCACGCCTTCACCTT  
TAACACCTCCAGTCCCTCATCTGAAGGTTCCCTCTCCAGAGGCAGAGGTCGACATCCACACCTAATGTC  
CACATGGTCAGCACCACCCTGCCTGTGGACAGCAGGATGATTGAGGATGCAATTCGAAGTCACAGCGAAT  
CAGCCTCACCTTCAGCCCTGTCCAGTAGCCCCAACAACTCTGAGCCCCAACAGGCTGGTCACAGCCGAAAAC  
CCCCGTGCCAGCACAAAGAGAGCGGGCACCAGTATCTGGGACCCAGGAGAAAAACAAAATTAGGCCTCGT  
GGACAGAGAGATTCAAGCTATTATTGGGAAATAGAAGCCAGTGAAGTGATGCTGTCCACTCGGATTGGGT  
CAGGCTCTTTTGAACTGTTTATAAGGGTAAATGGCACGGAGATGTTGCAGTAAAGATCCTAAAGGTTGT  
CGACCCAACCCAGAGCAATTCCAGGCCTTCAGGAATGAGGTGGCTGTTCTGCGCAAAACACGGCATGTG  
AACATTCTGCTTTTCATGGGGTACATGACAAAGGACAACCTGGCAATTGTGACCCAGTGGTGCGAGGGCA  
GCAGCCTCTACAAACACCTGCATGTCCAGGAGACCAAGTTTCAGATGTTCCAGCTAATTGACATTGCCCCG  
GCAGACGGCTCAGGGAATGGACTATTTGCATGCAAAGAACATCATCCATAGAGACATGAAATCCAACAAT  
ATATTTCTCCATGAAGGCTTAACAGTGAAAATTGGAGATTTTGGTTTGGCAACAGTAAAGTCACGCTGGA  
GTGGTTCTCAGCAGGTTGAACAACCTACTGGCTCTGTCCTCTGGATGGCCCCAGAGGTGATCCGAATGCA  
GGATAACAACCCATTAGTTTCCAGTCGGATGTCTACTCCTATGGCATCGTATTGTATGAACTGATGACG  
GGGGAGCTTCCTTATTCTCACATCAACAACCGAGATCAGATCATCTTCATGGTGGGCCGAGGATATGCCT  
CCCCAGATCTTAGTAAGCTATATAAGAACTGCCCCAAAGCAATGAAGAGGCTGGTAGCTGACTGTGTGAA

GAAAGTAAAGGAAGAGAGGCCTCTTTTTCCCAGATCCTGTCTTCCATTGAGCTGCTCCAACACTCTCTA  
CCGAAGATCAACCGGAGCGCTTCCGAGCCATCCTTGCATCGGGCAGCCCACACTGAGGATATCAATGCTT  
GCACGCTGACCACGTCCCCGAGGCTGCCTGTCTTCTAGTTGACTTTGCACCTGTCTTCAGGCTGCCAGGG  
GAGGAGGAGAAGCCAGCAGGCACCACTTTTCTGCTCCCTTTCTCCAGAGGCAGAACACATGTTTTCAGAG  
AAGCTGCTGCTAAGGACCTTCTAGACTGCTCACAGGGCCTTAACCTCATGTTGCCTTCTTTTCTATCCCT  
TTGGGCCCTGGGAGAAGGAAGCCATTTGCAGTGCTGGTGTGTCCTGCTCCCTCCCCACATTCCCCATGCT  
CAAGGCCCAGCCTTCTGTAGATGCGCAAGTGGATGTTGATGGTAGTACAAAAAGCAGGGGGCCAGCCCCA  
GCTGTTGGCTACATGAGTATTTAGAGGAAGTAAGGTAGCAGGCAGTCCAGCCCTGATGTGGAGACACATG  
GGATTTTGAAATCAGCTTCTGGAGGAATGCATGTCACAGGCGGGACTTTCTTCAGAGAGTGGTGCAGCG  
CCAGACATTTTGACATAAGGCACCAAACAGCCCAGGACTGCCGAGACTCTGGCCGCCCCGAAGGAGCCTG  
CTTTGGTACTATGGAACCTTTCTTAGGGGACACGTCCTCCTTTCACAGCTTCTAAGGTGTCCAGTGCATT  
GGGATGGTTTTCCAGGCAAGGCACTCGGCCAATCCGCATCTCAGCCCTCTCAGGGAGCAGTCTTCCATCA  
TGCTGAATTTTGTCTTCCAGGAGCTGCCCTATGGGGCGGGGCCGCAGGGCCAGCCTTGTTTCTCTAACA  
AACAACAAACAAACAGCCTTGTTTCTCTAGTCACATCATGTGTATACAAGGAAGCCAGGAATACAGGTT  
TTCTTGATGATTTGGGTTTTAATTTGTTTTATTGCACCTGACAAAATACAGTTATCTGATGGTCCCTC  
AATTATGTTATTTAATAAAATAAATTAATTTAGGTGTAA

>NM\_000321.3 Homo sapiens RB transcriptional corepressor 1 (RB1), transcript variant 1, mRNA  
AGTTGCCGGGCGGGGAGGGCGCGTCCGGTTTTTCTCAGGGGACGTTGAAATTATTTTGTAAACGGGAGT  
CGGGAGAGGACGGGGCGTGCCCCGACGTGCGCGCGCTCGTCCTCCCCGGCGCTCCTCCACAGCTCGCTG  
GCTCCCGCCGCGAAAGGCGTCATGCCGCCAAAACCCCCGAAAAACGGCCGCCACCGCCGCCGCTGCC  
GCCGCGGAACCCCCGGCACCGCCGCCGCCGCCCTCTGAGGAGGACCCAGAGCAGGACAGCGGCCCGG

AGGACCTGCCTCTCGTCAGGCTTGAGTTTGAAGAAACAGAAGAACCTGATTTTACTGCATTATGTCAGAA  
ATTAAAGATACCAGATCATGTCAGAGAGAGAGCTTGGTAACTTGGGAGAAAAGTTTCATCTGTGGATGGA  
GTATTGGGAGGTTATATTCAAAGAAAAAGGAACTGTGGGGAATCTGTATCTTTATTGCAGCAGTTGACC  
TAGATGAGATGTCGTTCACTTTTACTGAGCTACAGAAAAACATAGAAATCAGTGTCCATAAATTCCTTAA  
CTTACTAAAAGAAATTGATACCAGTACCAAAGTTGATAATGCTATGTCAAGACTGTTGAAGAAGTATGAT  
GTATTGTTTGCACTCTTCAGCAAATTGGAAAGGACATGTGAACTTATATATTTGACACAACCCAGCAGTT  
CGATATCTACTGAAATAAATTCTGCATTGGTGCTAAAAGTTTCTTGGATCACATTTTTATTAGCTAAAGG  
GGAAGTATTACAAATGGAAGATGATCTGGTGATTTCAATTCAGTTAATGCTATGTGTCCTTGACTATTTT  
ATTAAACTCTCACCTCCCATGTTGCTCAAAGAACCATATAAAACAGCTGTTATACCCATTAATGGTTCAC  
CTCGAACACCCAGGCGAGGTCAGAACAGGAGTGCACGGATAGCAAAACAACCTAGAAAATGATACAAGAAT  
TATTGAAGTTCTCTGTAAAGAACATGAATGTAATATAGATGAGGTGAAAAATGTTTATTTCAAAAATTTT  
ATACCTTTTATGAATTCTCTTGGACTTGTAACATCTAATGGACTTCCAGAGGTTGAAAATCTTTCTAAAC  
GATACGAAGAAATTTATCTTAAAAATAAAGATCTAGATGCAAGATTATTTTGGATCATGATAAACTCT  
TCAGACTGATTCTATAGACAGTTTTGAAACACAGAGAACACCACGAAAAAGTAACCTTGATGAAGAGGTG  
AATGTAATTCCTCCACACACTCCAGTTAGGACTGTTATGAACACTATCCAACAATTAATGATGATTTTAA  
ATTCAGCAAGTGATCAACCTTCAGAAAATCTGATTTCTATTTAACAACCTGCACAGTGAATCCAAAAGA  
AAGTATACTGAAAAGAGTGAAGGATATAGGATACATCTTTAAAGAGAAATTTGCTAAAGCTGTGGGACAG  
GGTTGTGTCGAAATTGGATCACAGCGATACAACTTGGAGTTCGCTTGTATTACCGAGTAATGGAATCCA  
TGCTTAAATCAGAAGAAGAACGATTATCCATTCAAATTTTAGCAAACCTTCTGAATGACAACATTTTTCA  
TATGTCTTTATTGGCGTGCGCTCTTGAGGTTGTAATGGCCACATATAGCAGAAGTACATCTCAGAATCTT  
GATTCTGGAACAGATTTGTCTTTCCCATGGATTCTGAATGTGCTTAATTTAAAAGCCTTTGATTTTTACA  
AAGTGATCGAAAGTTTTATCAAAGCAGAAGGCAACTTGACAAGAGAAATGATAAAACATTTAGAACGATG  
TGAACATCGAATCATGGAATCCCTTGCATGGCTCTCAGATTCACCTTTATTTGATCTTATTAACAATCA  
AAGGACCGAGAAGGACCAACTGATCACCTTGAATCTGCTTGTCTCTTAATCTTCCTCTCCAGAATAATC  
ACACTGCAGCAGATATGTATCTTTCTCTGTAAGATCTCAAAGAAAAAAGGTTCAACTACGCGTGTA

TTCTACTGCAAATGCAGAGACACAAGCAACCTCAGCCTTCCAGACCCAGAAGCCATTGAAATCTACCTCT  
CTTTCACCTGTTTTATAAAAAAGTGTATCGGCTAGCCTATCTCCGGCTAAATACACTTTGTGAACGCCTTC  
TGTCTGAGCACCCAGAATTAGAACATATCATCTGGACCCTTTTCCAGCACACCCTGCAGAATGAGTATGA  
ACTCATGAGAGACAGGCATTTGGACCAAATTATGATGTGTTCCATGTATGGCATATGCAAAGTGAAGAAT  
ATAGACCTTAAATTCAAAATCATTGTAACAGCATACAAGGATCTTCCTCATGCTGTTCCAGGAGACATTCA  
AACGTGTTTTGATCAAAGAAGAGGAGTATGATTCTATTATAGTATTCTATAACTCGGTCTTCATGCAGAG  
ACTGAAAACAAATATTTTGCAGTATGCTTCCACCAGGCCCTACCTTGTCACCAATACCTCACATTCTCT  
CGAAGCCCTTACAAGTTTCCTAGTTCACCCTTACGGATTCTGGAGGGAACATCTATATTTACCCCTGA  
AGAGTCCATATAAAATTTCAGAAGGTCTGCCAACACCAACAAAAATGACTCCAAGATCAAGAATCTTAGT  
ATCAATTGGTGAATCATTCGGGACTTCTGAGAAGTTCCAGAAAATAAATCAGATGGTATGTAACAGCGAC  
CGTGTGCTCAAAAGAAGTGCTGAAGGAAGCAACCCTCCTAAACCACTGAAAAAACTACGCTTTGATATTG  
AAGGATCAGATGAAGCAGATGGAAGTAAACATCTCCCAGGAGAGTCCAAATTTAGCAGAAAAGTGGCAGA  
AATGACTTCTACTCGAACACGAATGCAAAAGCAGAAAATGAATGATAGCATGGATACCTCAAACAAGGAA  
GAGAAATGAGGATCTCAGGACCTTGGTGGACACTGTGTACACCTCTGGATTCAATTGTCTCTCACAGATGT  
GACTGTATAACTTTCCAGGTTCTGTTTATGGCCACATTTAATATCTTCAGCTCTTTTTGTGGATATAAA  
ATGTGCAGATGCAATTGTTTGGGTGATTCTAAGCCACTTGAAATGTTAGTCATTGTTATTTATACAAGA  
TTGAAAATCTTGTGTAAATCCTGCCATTTAAAAAGTTGTAGCAGATTGTTTCTCTTCCAAAGTAAAATT  
GCTGTGCTTTATGGATAGTAAGAATGGCCCTAGAGTGGGAGTCTGATAACCCAGGCCTGTCTGACTACT  
TTGCCTTCTTTTGTAGCATATAGGTGATGTTTGCTCTTGTTTTTATTAATTTATATGTATATTTTTTAA  
TTTAACATGAACACCCTTAGAAAAATGTGCCTATCTATCTTCCAAATGCAATTTGATTGACTGCCCATT  
ACCAAAATTATCCTGAACTCTTCTGCAAAAATGGATATTATTAGAAATTAGAAAAAAATTACTAATTTTA  
CACATTAGATTTTATTTTACTATTGGAATCTGATATACTGTGTGCTTGTTTTATAAAATTTTGCTTTTAA  
TTAAATAAAAGCTGGAAGCAAAGTATAACCATATGATACTATCATACTACTGAAACAGATTTTCATACCTC  
AGAATGTAAAAGAACTTACTGATTATTTTCTTCATCCAACCTTATGTTTTTAAATGAGGATTATTGATAGT  
ACTCTTGGTTTTTATACCATTCAGATCACTGAATTTATAAAGTACCCATCTAGTACTTGAAAAAGTAAAG

TGTTCTGCCAGATCTTAGGTATAGAGGACCCTAACACAGTATATCCCAAGTGCACTTTCTAATGTTTCTG  
GGTCCTGAAGAATTAAGATACAAATTAATTTTACTCCATAAACAGACTGTTAATTATAGGAGCCTTAATT  
TTTTTTTCATAGAGATTTGTCTAATTGCATCTCAAAATTATTCTGCCCTCCTTAATTTGGGAAGGTTTGT  
GTTTTCTCTGGAATGGTACATGTCTTCCATGTATCTTTGAACTGGCAATTGTCTATTTATCTTTATTT  
TTTTAAGTCAGTATGGTCTAACACTGGCATGTTCAAAGCCACATTATTTCTAGTCCAAAATTACAAGTAA  
TCAAGGGTCATTATGGGTTAGGCATTAATGTTTCTATCTGATTTTGTGCAAAGCTTCAAATTAACAG  
CTGCATTAGAAAAAGAGGCGCTTCTCCCCTCCCCTACACCTAAAGGTGTATTTAACTATCTTGTGTGAT  
TAACTTATTTAGAGATGCTGTAACCTAAAATAGGGGATATTTAAGGTAGCTTCAGCTAGCTTTTAGGAAA  
ATCACTTTGTCTAACTCAGAATTATTTTTAAAAAGAAATCTGGTCTTGTTAGAAAACAAAATTTTATTTT  
GTGCTCATTTAAGTTTCAAACCTACTATTTTGACAGTTATTTTGATAACAATGACACTAGAAAACCTTGAC  
TCCATTTTCATCATTGTTTCTGCATGAATATCATACAAATCAGTTAGTTTTTAGGTCAAGGGCTTACTATT  
TCTGGGTCTTTTGCTACTAAGTTCACATTAGAATTAGTGCCAGAATTTTAGGAACTTCAGAGATCGTGTA  
TTGAGATTTCTTAAATAATGCTTCAGATATTATTGCTTTATTGCTTTTTTGATTGGTTAAACTGTACA  
TTTAAATTGCTATGTTACTATTTTCTACAATTAATAGTTTGTCTATTTTAAATAAATTAGTTGTTAAG  
AGTCTTAA

>NM\_014781.5 Homo sapiens RB1 inducible coiled-coil 1 (RB1CC1), transcript variant 1, mRNA  
GGAGTCGACAATAACAAACCAAGCCGCGGCGGTGTCCGCGGCCCTGCCGAGCCCTCGGCGTTGCCTCAGA  
ATCCCCAGTCGCTGGGCCCCCTCGGCTCTGACAGGCCGCGGCCTTCTGTCCCCGCGCCCAGACCCAGA  
GCCGAGGGGCCTGCTCGCGTCCTTGTCGCCCCGACCCCTCCTGCCTCCTAGAGTTCGGGGCCGCGGCG  
GGCGGGCGCCCCGGACGCCGCGGTTGTGTCGGCTTAGCGGTGCCGAATGGGCGGTTGGTAACCGCTGCC  
GAGGACTAGGCGGCGCGGAAGATGGTGCCGGGGGTCGCTGGCTCTGCTGCTGCCGCCGCGGAAGGAGGA  
GGCGTTGCCGTTTTCTGAGTTTAACCAAGTAATGCCATTCAGTTGCCAATCTCAAGCAAAGCAAACATAA

GCCAGTTTTAATCTACTTTTTAAGAAAAGTGGTAGTCCTTTTCACAGTGCCTGACGTAAGTGTATCAGAG  
GGTGAGGTATAAGCTCACAGAATTCAGATAAATCATCATGAAGTTATATGTATTTCTGGTTAACTGGA  
ACTACTCTAACATTTGACACTGAACTTACAGTGCAAAGTGTGGCAGACCTTAAGCATGCCATTCAAAGCA  
AATACAAGATTGCTATTCAACACCAGGTGCTGGTGGTCAATGGAGGAGAATGCATGGCTGCAGATCGAAG  
AGTGTGTACCTACAGTGTGGGACGGATACAAATCCAATTTTTCTTTTAAACAAAGAAATGATCTTATGT  
GATCGTCCACCTGCTATTCTAAACTACCTTTTCGACAGAAAATGACATGGAAATAAAAGTTGAAGAAT  
CTCTTATGATGCCTGCAGTTTTTCATACTGTTGCTTCAAGGACACAGCTTGCATTGGAAATGTATGAAGT  
TGCCAAGAACTTTGTTCTTTTGTGAAGGTCTTGACATGATGAACATCTTCAACACCAAGGCTGGGCT  
GCAATCATGGCCAACCTGGAGGACTGTTCAAATTCATACCAAAGCTACTTTTCAAGTTTGAAAGTATTT  
ATTCAAATTATCTGCAGTCCATAGAAGACATCAAGTTAAACTTACTCATTTAGGAACTGCAGTTTCAGT  
AATGGCCAAGATTCCACTGTTGGAGTGCCTAACCAGACATAGTTACAGAGAATGTTTGGGAAGACTGGAT  
TCTTTACCTGAACATGAAGACTCAGAAAAAGCTGAGATGAAAAGATCCACTGAACTGGTGCTCTCTCCTG  
ATATGCCTAGAACAATAACGAATCTTTGTTAACCTCATTTCCCAAGTCAGTGGAACATGTGTCCCCAGA  
TACCGCAGATGCTGAAAGTGGCAAAGAAATTAGGGAATCTTGTCAAAGTACTGTTTCATCAGCAAGATGAA  
ACTACGATTGACACTAAAGATGGTGATCTGCCCTTTTTTAATGTCTCTTTGTTAGACTGGATAAATGTTT  
AAGATAGACCTAATGATGTGGAATCTTTGGTCAGGAAGTGCTTTGATTCTATGAGCAGGCTTGATCCAAG  
GATTATTCGACCATTTATAGCAGAATGCCGTCAAAGTATTGCCAACTTGATAATCAGAATATGAAAGCC  
ATTAAAGGACTTGAAGATCGGCTCTACGCCCTGGACCAGATGATTGCTAGCTGTGGCCGACTGGTGAATG  
AACAGAAAGAGCTTGCTCAGGGATTTTTAGCTAATCAGAAGAGAGCTGAAAAGTTAAAGGATGCATCTGT  
ATTACCTGATTTATGCCTGAGTCACGCAAATCAGTTGATGATTATGTTGCAAAATCATAGAAAAGTGT  
GATATTAAGCAGAAGTGTACCACTGCCAAACAAGAACTAGCAAATAACCTACATGTCAGACTGAAGTGGT  
GTTGCTTTGTAATGCTTCATGCTGATCAAGATGGAGAGAAGTTACAAGCTTTGCTCCGCCTCGTAATAGA  
GCTGTTAGAAAGAGTCAAAATTGTTGAAGCTCTTAGTACAGTTCCTCAGATGTACTGCTTAGCTGTTGTT  
GAGGTTGTAAGAAGAAAAATGTTCATAAAAACTACAGGGAGTGGGCTGGTGCTTTAGTCAAAGATGGAA  
AGAGATTATATGAAGCAGAAAAATCAAAAAGGGAATCCTTTGGGAAATTATTTAGGAAGTCTTTTTTAAG

AAATCGTCTGTTTAGGGGACTGGACTCCTGGCCCCCTTCCTTTTGTACTCAAAAGCCTCGAAAGTTTGAC  
TGTGAACTCCAGATATTTCAATAAAAGATTTACAGTTTCTGCAATCATTTTGTCTTCGGAAGTTCAGC  
CATTCCTCAGGGTCCCTTACTTTGTGACTTTGAACCTCTACACCAGCATGTACTTGCTCTACATAATTT  
GGTAAAAGCAGCACAAAGTTTGGATGAAATGTCACAGACCATTACAGATCTACTGAGTGAACAAAAGGCA  
TCTGTGAGTCAGACATCCCCACAGTCTGCTTCTTCACCAAGGATGGAAAGTACAGCAGGAATTACAATA  
CTACCTCACCGAGAACTCCTCCACCACTGACTGTTGAGGATCCCTTATGTCCTGCAGTTTGTCCCTTAGA  
AGAATTATCTCCAGATAGTATTGATGCACATACGTTTGATTTTGAAACTATTCCCCATCCAAACATAGAA  
CAGACTATTCACCAAGTTTCTTTAGACTTGGATTCAATAGCAGAAAGTCCTGAATCAGATTTTATGTCTG  
CTGTGAATGAGTTTGTAAAGAAGAAAATTTGTCGTCTCCTAATCCTATAAGTGATCCACAAAGCCCAGA  
AATGATGGTGGAATCACTTTATTCATCAGTTATCAATGCGATAGACAGTAGACGAATGCAGGATACAAAT  
GTATGTGGTAAGGAGGATTTTGGAGATCATACTTCTCTGAATGTCCAGTTGGAAAGATGTAGAGTTGTTG  
CCCAAGACTCTCACTTCAGTATACAAACCATTAAAGGAAGACCTTTGCCACTTTAGAACATTTGTACAAAA  
AGAACAGTGTGACTTCTCAAATTCATTAATAATGTACAGCAGTAGAAATAAGAAACATTATTGAAAAAGTA  
AAATGTTCTCTGGAAATAACACTAAAAGAAAAACATCAAAAAGAACTACTGTCTTTAAAAAATGAATATG  
AAGGTAACTTGACGGACTAATAAAGGAAACTGAAGAGAATGAAAACAAAATTAATAAATTGAAGGGAGA  
GTTAGTATGCCTTGAGGAGGTTTTACAAAATAAGATAATGAATTTGCTTTGGTTAAACATGAAAAAGAA  
GCTGTAATCTGCCTGCAGAATGAAAAGGATCAGAAGTTGTTAGAGATGGAAAATATAATGCACTCTCAAA  
ATTGTGAAATTAAGAACTGAAGCAGTCACGAGAAATAGTGTTAGAAGACTTAAAAAAGCTCCATGTTGA  
AAATGATGAGAAGTTACAGTTATTGAGGGCAGAACTTCAGTCCTTGGAGCAAAGTCATCTAAAGGAATTA  
GAGGACACACTTCAGGTTAGGCACATACAAGAGTTTGAGAAGGTTATGACAGACCACAGAGTTTCTTTGG  
AGGAATTAATAAAGGAAAACCAACAAATAATTAATCAAATACAAGAATCTCATGCTGAAATTATCCAGGA  
AAAAGAAAAACAGTTACAGGAATTAATACTCAAGGTTTCTGATTTGTCAGACACGAGATGCAAGTTAGAG  
GTTGAACTTGC GTTGAAGGAAGCAGAACTGATGAAATAAAAAATTTGCTGGAAGAAAGCAGAGCCCAGC  
AGAAGGAGACCTTGAAATCTCTTCTTGAACAAGAGACAGAAAAATTTGAGAACAGAAATTAGTAACTCAA  
CCAAAAGATTCAGGATAATAATGAAAATTATCAGGTGGGCTTAGCAGAGCTAAGAACTTAATGACAATT

GAAAAAGATCAGTGTATTTCCGAGTTAATTAGTAGACATGAAGAAGAATCTAATATACTTAAAGCTGAAT  
TAAACAAAGTAACATCTTTGCATAACCAAGCATTTGAAATAGAAAAAACCTAAAAGAACAAATAATTGA  
ACTGCAGAGTAAATTGGATTGAGAATTGAGTGCTCTTGAAAGACAAAAAGATGAAAAAATTACCCAACAA  
GAAGAGAAATACGAAGCTATTATCCAGAACCTTGAGAAAGACAGACAAAAATTGGTCAGCAGCCAGGAGC  
AAGACAGAGAACAGTTAATTCAGAAGCTTAATTGTGAAAAAGATGAAGCTATTCAGACTGCCCTAAAAGA  
ATTTAAATTGGAGAGAGAAGTTGTTGAGAAAGAGTTATTAGAAAAAGTTAAACATCTTGAGAATCAAATA  
GCAAAAAGTCCTGCCATTGACTCTACCAGAGGAGATTCTTCAAGCTTAGTTGCTGAACTTCAAGAAAAGC  
TTCAGGAAGAAAAAGCTAAGTTTCTAGAACAACCTGAAGAGCAAGAAAAAGAAAGAATGAAGAAATGCA  
AAATGTTGCAACATCTTTGATTGCGGAACAACAGACCAATTTTAACACTGTTTTAACAAGAGAGAAAAATG  
AGAAAAGAAAAACATAATAAATGATCTTAGTGATAAGTTGAAAAGTACAATGCAGCAACAAGAACGGGATA  
AAGATTTGATAGAGTCACTTTCTGAAGATCGAGCTCGTTTGCTTGAGGAAAAGAAAAAGCTTGAAGAAGA  
AGTCAGTAAGTTGCGTAGTAGCAGTTTTGTTCTTCACCATATGTAGCTACAGCCCCAGAACTTTATGGA  
GCTTGTGCACCTGAACTCCCAGGTGAATCAGATAGATCCGCTGTGGAAACAGCAGATGAAGGAAGAGTG  
ATTCAGCAATGGAGACAAGCATGATGTCTGTACAAGAAAAATTCATATGTTGTCTGAAGAAAAACAGCG  
GATAATGCTGTTAGAACGAACATTGCAATTGAAAGAAGAAGAAAAATAACGGTTAAATCAAAGACTGATG  
TCTCAGAGCATGTCTTCAGTATCTTCAAGGCATTCTGAAAAGATAGCTATTAGAGATTTTCAGGTGGGAG  
ATTTGGTACTCATCATCCTAGACGAACGCCATGACAATTATGTGTTATTTACTGTTAGTCCTACTTTATA  
TTTTCTACATTCAGAGTCTCTACCTGCCCTGGATCTCAAACCAGGTGAGGGTGCTTCAGGTGCATCTAGA  
AGACCCTGGGTACTTGAAAAAGTAATGAAAAAGAATACTGTCAAGCCAAAAAGGCACAAAACAGATTTA  
AAGTTCCTTTGGGGACAAAGTTTTACAGAGTGAAAGCCGTATCATGGAATAAGAAAGTATAACTTATGGA  
CAAAATTAATACATTCTATGACATTTTTTTCTGATTTGTCCTGCAGTGCTCATTCACTCCAAAAACA  
GCAGGCCATCTTTTTATGCAAAAGTCAGCGTGACAATATACTTCACTGGTGACATCGTTTACTTTTTAA  
CTGGCTTCATTTTAGGAATAATAAATTCATCAGAATCCTTGGCTGAATTAATGGTTTTTGTTTTTGG  
TTTTTTTTTTTACCCAGACAACTCTAGAAATGCGGACCAAACTACTTCATTTTCTCAAAGGGCATACTT  
GTGCATTGTGGCTTATGATGAGCCATATTAATTGCCTGTAAATATACACTAGCTTGAAGTTAGATGTTA

AATGTTATTATTACCAGCATTTGTCCTTTGTGAAATCAGTATCAGAATACTTGCACTCTTTAACACATT  
CTTTATAAAATGTATAAATTATTCAGAACTATTTAAAATAAAGAGGAGTGTTATTGCATGCTGATAATCA  
TTTTGAGTTTGCCTCAGTAGATACTAAAGCAAATTGTTTCAGTTTTTTTAAATGCCCTTTGATGTTTCAA  
AAAAAAAAAAGGAACTGTAATTTGATTGACTGATTTTAAGATCAGCCATAAGTAATCAGCAATCTTCAAAA  
GCACTTTCAGTGGATTGGTCATCTGGGTTCTAAAGGGAAGAGTCTGTGCTACTAACCATTTCAAATGCAG  
ACTCAAACCTTCCCAACATCTTTATGACTCTAGAATAATCATATTGATGAAATCGTAATTCATGGTTGAG  
TTTCAGAACAAAAGATATTCATTGCACATTAACCATTAGAGGTCATTTAAATAACAAAATATTGTATTG  
TAAAAGAACTGTACAATTTTAAAACAATAAAGATTTGAACCTGTAAATGTGTGTGCCTTTTAAAGAAGGA  
TACATTTTAAATATATTTGAGTGATTGCTGGGAAGTGTGAAAATATTGTTATGTATCATATCAAAGAGAA  
ACATGTTTATTACAAAAATGTTCTTTAACTATATACTATGTAACAGGGTAAACAGTGTTATGTAGAATAG  
AATTGTGTAAACTAGATCTTTAGAGAAGTTGCCATTGAGCAAAGTTATTTAAATGAGTTAGTTGAGTTGG  
ATGAGAATTGTTTGAGGTTTGTGCTAGAGAACAATAATAAAATAATTCTTTTTCAGAAAATATTTAATT  
TCTTCATAAAAATAAGTTAAATATTTTTTTAAATATGTATATCTAATAGTACAAAATGGAATAAACATCA  
TAGTGTATAGAAAACCTGAATTTGACAAGTTAATGAATAAATGAACAAATGATTTCA

>NM\_021975.4 Homo sapiens RELA proto-oncogene, NF-kB subunit (RELA), transcript variant 1, mRNA

ATTTCGCCTCTGGCGAATGGCTCGTCTGTAGTGACGCCGCGGGCCCAGCTGCGACCCCGGCCCCGCC  
CCGGGACCCCGGCCATGGACGAACTGTTCCCCCTCATCTCCCGGCAGAGCCAGCCAGGCCTCTGGCCC  
CTATGTGGAGATCATTGAGCAGCCCAAGCAGCGGGGCATGCGCTTCGCTACAAGTGCGAGGGGCGCTCC  
GCGGGCAGCATCCCAGGCGAGAGGAGCACAGATACCACCAAGACCCACCCACCATCAAGATCAATGGCT  
ACACAGGACCAGGGACAGTGCGCATCTCCCTGGTCACCAAGGACCCTCCTCACCGGCCTCACCCCCACGA  
GCTTGTAGGAAAGGACTGCCGGGATGGCTTCTATGAGGCTGAGCTCTGCCGGACCGCTGCATCCACAGT  
TTCCAGAACCTGGGAATCCAGTGTGTGAAGAAGCGGGACCTGGAGCAGGCTATCAGTCAGCGCATCCAGA

CCAACAACAACCCCTTCCAAGTTCCTATAGAAGAGCAGCGTGGGGACTACGACCTGAATGCTGTGCGGCT  
CTGCTTCCAGGTGACAGTGCGGGACCCATCAGGCAGGCCCTCCGCCTGCCGCTGTCTTTCTCATCCC  
ATCTTTGACAATCGTGCCCCAACACTGCCGAGCTCAAGATCTGCCGAGTGAACCGAACTCTGGCAGCT  
GCCTCGGTGGGGATGAGATCTTCTACTGTGTGACAAGGTGCAGAAAGAGGACATTGAGGTGTATTTAC  
GGGACCAGGCTGGGAGGCCCGAGGCTCCTTTTCGCAAGCTGATGTGCACCGACAAGTGGCCATTGTGTTT  
CGGACCCCTCCCTACGCAGACCCAGCCTGCAGGCTCCTGTGCGTGTCTCCATGCAGCTGCGGCGGCCTT  
CCGACCGGGAGCTCAGTGAGCCCATGGAATTCCAGTACCTGCCAGATACAGACGATCGTCACCGGATTGA  
GGAGAAACGTAAAAGGACATATGAGACCTTCAAGAGCATCATGAAGAAGAGTCCTTTCAGCGGACCCACC  
GACCCCGGCCTCCACCTCGACGCATTGCTGTGCCTTCCCGCAGCTCAGCTTCTGTCCCAAGCCAGCAC  
CCCAGCCCTATCCCTTTACGTATCCCTGAGCACCATCAACTATGATGAGTTTCCCACCATGGTGTTC  
TTCTGGGCAGATCAGCCAGGCTCGGCCTTGGCCCCGGCCCCCTCCCAAGTCCTGCCCCAGGCTCCAGCC  
CCTGCCCCCTGCTCCAGCCATGGTATCAGCTCTGCCCCAGGCCCCAGCCCCTGTCCCAGTCCTAGCCCCAG  
GCCCTCCTCAGGCTGTGGCCCCACCTGCCCCAAGCCCACCCAGGCTGGGGAAGGAACGCTGTCAGAGGC  
CCTGCTGCAGCTGCAGTTTGATGATGAAGACCTGGGGGCCTTGCTTGGCAACAGCACAGACCCAGCTGTG  
TTCACAGACCTGGCATCCGTCGACAACTCCGAGTTTCAGCAGCTGCTGAACCAGGGCATACTGTGGCCC  
CCCACACAACTGAGCCCATGCTGATGGAGTACCCTGAGGCTATAACTCGCCTAGTGACAGGGGCCAGAG  
GCCCCCGACCCAGCTCCTGCTCCACTGGGGGGCCCCGGGGCTCCCCAATGGCCTCCTTTCAGGAGATGAA  
GACTTCTCCTCCATTGCGGACATGGACTTCTCAGCCCTGCTGAGTCAGATCAGCTCCTAAGGGGGTGACG  
CCTGCCCTCCCCAGAGCACTGGGTTGCAGGGGATTGAAGCCCTCCAAAAGCACTTACGGATTCTGGTGGG  
GTGTGTTCCAACTGCCCCAACTTTGTGGATGTCTTCTTGGAGGGGGGAGCCATATTTATTCTTTAT  
TGTCAGTATCTGTATCTCTCTCTTTTTGGAGGTGCTTAAGCAGAAGCATTAACCTCTCTGAAAGGGG  
GGAGCTGGGGAAACTCAAACTTTTCCCTGTCTGATGGTCAGCTCCCTTCTCTGTAGGGAACTCTGGGG  
TCCCCCATCCCCATCCTCCAGCTTCTGGTACTCTCCTAGAGACAGAAGCAGGCTGGAGGTAAGGCCTTTG  
AGCCCACAAAGCCTTATCAAGTGTCTTCCATCATGGATTCATTACAGCTTAATCAAATAACGCCCCAGA  
TACCAGCCCCTGTATGGCACTGGCATTGTCCCTGTGCCTAACACCAGCGTTTGAGGGGGCTGGCCTTCCTG

CCCTACAGAGGTCTCTGCCGGCTCTTTCCTTGCTCAACCATGGCTGAAGGAAACCAAGTGCAACAGCACTG  
GCTCTCTCCAGGATCCAGAAGGGGTTTGGTCTGGGACTTCCTTGCTCTCCCTCTTCTCAAGTGCCTTAAT  
AGTAGGGTAAGTTGTTAAGAGTGGGGGAGAGCAGGCTGGCAGCTCTCCAGTCAGGAGGCATAGTTTTTAC  
TGAACAATCAAAGCACTTGGACTCTTGCTCTTCTACTCTGAACTAATAAATCTGTTGCCAAGCTGG

>NM\_005873.3 Homo sapiens regulator of G protein signaling 19 (RGS19), transcript variant 1, mRNA

GGATCTGGCAGCCACTCAGCCCTTCGAGCTGTAGGGGAGGCGCTGCGCCCCGGCCCCAGCCGATCGGGG  
GCTCCTGGCGCTAGCCTCCCTCCAGAGCGCCGCAGGAGTCCCTCCTGCCGTCTGACTTGAGTCCCTGCTG  
CTGCAGTGACGCCCCCTTCGGCAGCCAGGGTGGGGCCCAGACCAACCTGGCCCCCTCTGCCCCACCCC  
GCCTTTGGGTCGCTGACCCCCAGGCTGTGGTGAGGGTCTGAGAGCTGGTACCACGGAGCCTGGGCAACCT  
CCTCCGCCCCACCCATGCCACCCCGCATGAGGCTGAGAAGCAGATCACAGGGCCAGAGGAGGCGGACCGG  
CCCCCTTCAATGTCCAGTCATGATACAGCCTCTCCAGCGGCCCCCAGCCGCAACCCCTGCTGCCTGTGCT  
GGTGCTGCTGCTGTAGCTGCTCCTGGAACCAAGAGCGGCGGCGCGTGGCAGGCCTCCCGGGAGAGCAA  
GCTGCAGCCCCTCCCAGCTGTGAAGTATGTGCCACGCCAAGTCCTGAGGAGGTGCAGAGCTGGGCGCAG  
TCTTTTGACAAGCTGATGCACAGCCCAGCGGGACGCAGCGTGTTCCGGGCGTTCTGCGGACAGAGTACA  
GCGAGGAGAACATGCTCTTCTGGTTGGCCTGCGAGGAGCTGAAGGCCGAGGCCAACCAGCATGTGGTAGA  
CGAGAAGGCGAGGCTCATCTACGAGGACTACGTATCCATCCTGTCCCCAAGGAGGTGAGCCTGGACTCC  
CGTGTGCGGGAGGGCATCAACAAGAAGATGCAGGAGCCGTCCGCACACACGTTGACGACGCGCAGCTGC  
AGATCTACACGCTCATGCACCGGGACTCCTACCCCGCTTCTCAGCTCTCCACCTACCGTGCCCTGCT  
GCTGCAGGGGCCATCACAGTCCTCCTCCGAGGCCTAGGCCGCCCCCAGCAGCACAGACCCCGCCGCTCC  
TACGGCCGACTCTGGGTTCCCTTCAGGTGTTGTTGTCGGCAGGGCTGTCAGGGCACATGCCTGGCCGGCT  
GGGGTCCCCACCCGCGGAGACGGTCCTAGACCCAGTGGGGAGTGCTGTGTCTCCTGGGTCTGCCACCCG  
TGGCCAAGCAGGAACTCCAGGTGCAGGGCGGGCCTCCAGGTGCAGGGCGGGCCAGAAGCCCCCTCATCGG

CCCGCAGCTGGCTGGCCCAGTGCTCCTGGCTGGGGGCTCTTGCGTGGTGAGAGTAGGGGTCCCCCAGGA  
GCCATGCTGGACCCATGAGCCTCGCTGGGGCCTCCTCCCAGGCAGCCAATGGGCCCCAGACAAGCCTTT  
GGTGGGGAACAGAACCTCCGCATCGTGTAGTTTTGTGACATAAGGAGACCTCCTACTTGAGCTGTCTGTA  
CCCCAGAATCAAACACAGAACCTCAGAACCAGATTTAGGACCTCAGAATCCTGCACTCAAGGTGGCAGGA  
CCCAATTTCTGTTTTATATGTTTCATGAACTTTAAACCTGGAAACATGTCCTTACTAGGTGTTTTATCAAA  
AAAAAGTTTTCATATTTATCTCTATCCCTAACCCCCCAAAAATAGGATGTCTTATTATTGAAGATATTTT  
TAAAGCAAA

>NM\_005614.4 Homo sapiens Ras homolog, mTORC1 binding (RHEB), mRNA

GGGAGGGTCATGACGCAGCGAGTTTCAGTCGTGACTTTTCTGGGGGCATCGCGGCGTCCCCTTTTTTGC  
CTTTAAAGTAAAACGTCGCCCCGACGCACCCCCCGCGTATTTCTGGGGGGCGGAGGCGGCGGGCCACGGCG  
CGAAGAGGGGCGGTGCTGACGCCGGCCGGTCACGTGGGCGTGTTGTGGGGGGGAGGGGCGCCGCCGCGCG  
GTCGGTTCCGGGCGGTTGGGAGCGCGCGAGCTAGCGAGCGAGAGGCAGCCGCGCCCCGCCGCCCTGC  
TCTGTATGCCGCTCTCTCCCGGCGCGGCCGCCGCCGATCACAGCAGCAGGAGCCACCGCCGCCGCGGTTG  
ATGTGGTTGGGCCGGGGCTGAGGAGGCCGCCAAGATGCCGCAGTCCAAGTCCCGGAAGATCGCGATCCTG  
GGCTACCGGTCTGTGGGGAAATCCTCATTGACGATTCAATTTGTTGAAGGCCAATTTGTGGACTCCTACG  
ATCCAACCATAGAAAACACTTTTACAAAGTTGATCACAGTAAATGGACAAGAATATCATCTTCAACTTGT  
AGACACAGCCGGGCAAGATGAATATTCTATCTTTCTCAGACATACTCCATAGATATTAATGGCTATATT  
CTTGTGTATTCTGTTACATCAATCAAAAGTTTTGAAGTGATTAAAGTTATCCATGGCAAATTGTTGGATA  
TGGTGGGGAAAGTACAAATACCTATTATGTTGGTTGGGAATAAGAAAGACCTGCATATGGAAAGGGTGAT  
CAGTTATGAAGAAGGGAAAGCTTTGGCAGAATCTTGGAATGCAGCTTTTTTGAATCTTCTGCTAAAGAA  
AATCAGACTGCTGTGGATGTTTTTCGAAGGATAATTTTGGAGGCAGAAAAAATGGACGGGGCAGCTTCAC  
AAGGCAAGTCTTCATGCTCGGTGATGTGATTCTGCTGCAAAGCCTGAGGACACTGGGAATATATTCTACC

TGAAGAAGCAAACCTGCCCCGTTCTCCTTGAAGATAAACTATGCTTCTTTTTCTTCTGTTAACCTGAAAGA  
TATCATTTGGGTCAGAGCTCCCCCTCCCTTCAGATTATGTAACTCTGAGTCTGTCCAAATGAGTTCACTT  
CCATTTTCAAATTTTAAGCAATCATATTTCAATTTATATATTGTATTCTTAATATTATGACCAAGAAT  
TTTATCGGCATTAATTTTTCAGTGTAGTTTGTTGTTTAAAATAATGTAATCATCAAAATGATGCATATTG  
TTACACTACTATTAACCTAGGCTTCAGTATATCAGTGTTTATTTTATTGTGTAAATGTATACTTGTAAT  
AAAATAGCTGCAAACCTCAGTCCTTTGTGCTACTTGATGTGGCTTTCAAAGAAGAGAAGCCTTGTCTGA  
GTTTCTCACTTGGCTTCAGGAAGGCCCCAGGTTGGATTCCAGAAACCAGTGAAGATGTGGCCACAGGAGG  
AGGTGTGCTGAGGTGGCTGCTGACCGTGGACTCCCTGCGCAGTGGCCTGCAGATGTTGGGGCTGGGTTAC  
AGCTGATTGAAGCTGAGTGGCCCTGGGGGGTCTGTGAGGGGAGTTCCTCCCAAGTGATGAAATTCTCTCC  
TTCCACCCTCAAATCCCTAGACCTTGACTGAAATGCTCCGTGGTCGGGAGCCTGGTCAAGGAGGAGGAGC  
TGCTGAGAGGCATTGTTGCCCCTTGCTCATAGCTTAGCTCGATGTCCGTGTCAGACAGGAGATGATTGAG  
AACAGCCTTGCCTGTCACTGTCCTAGAACACCCTGGAGTTTAGTGTTCTGTGTCAGAGTCTTGGGAGCCT  
CCTTCAGACCCAGATGACGGGCCTCCCTCTGTCCAAGGAGCAGCTGTAAAGGAGAAGAGGGATTTCATTT  
GTTTGGTGGCTGTTACCTTGCTGTAAAGTCAAACCTGGAGTTGAGCAGTGCTTTTTAAACGATTCCCTTT  
TGCAGCTAAAATTTACAGGGCTATTTCTAATACGTAAGCAAATGTTACCATTGACTTTATTAATAAAAT  
ATAGTTTTGCTTTGCA

>NM\_003161.4 Homo sapiens ribosomal protein S6 kinase B1 (RPS6KB1), transcript variant 1, mRNA  
GCACTGAGCCTAAGCAGCCGGTGATGGCGGCAGCGGCTGTGGTGGCTGCGGCGGGTCCGGGCCCATGAGG  
CGACGAAGGAGGCGGGACGGCTTTTACCCAGCCCCGGACTCCGAGACAGGGAAGCTGAGGACATGGCAG  
GAGTGTTTGACATAGACCTGGACCAGCCAGAGGACGCGGGCTCTGAGGATGAGCTGGAGGAGGGGGTCA  
GTAAATGAAAGCATGGACCATGGGGGAGTTGGACCATATGAACTGGCATGGAACATTGTGAGAAATTT  
GAAATCTCAGAACTAGTGTGAACAGAGGGCCAGAAAAATCAGACCAGAATGTTTTGAGCTACTTCGGG

TACTTGGTAAAGGGGGCTATGGAAAGGTTTTTCAAGTACGAAAAGTAACAGGAGCAAATACTGGGAAAAT  
ATTTGCCATGAAGGTGCTTAAAAAGGCAATGATAGTAAGAAATGCTAAAGATACAGCTCATACAAAAGCA  
GAACGGAATATTCTGGAGGAAGTAAAGCATCCCTTCATCGTGGATTTAATTTATGCCTTTCAGACTGGTG  
GAAAACCTACCTCATCCTTGAGTATCTCAGTGGAGGAGAACTATTTATGCAGTTAGAAAGAGAGGGAAT  
ATTTATGGAAGACACTGCCTGCTTTTACTTGGCAGAAATCTCCATGGCTTTGGGGCATTTACATCAAAG  
GGGATCATCTACAGAGACCTGAAGCCGGAGAATATCATGCTTAATCACCAAGGTCATGTGAACTAACAG  
ACTTTGGACTATGCAAAGAATCTATTCATGATGGAACAGTCACACACACATTTTGTGGAACAATAGAATA  
CATGGCCCCTGAAATCTTGATGAGAAGTGGCCACAATCGTGCTGTGGATTGGTGGAGTTTGGGAGCATT  
ATGTATGACATGCTGACTGGAGCACCCCATTCCTGAGGAGAAATAGAAAGAAAACAATTGACAAAATCC  
TCAAATGTAACTCAATTTGCCTCCCTACCTCACACAAGAAGCCAGAGATCTGCTTAAAAAGCTGCTGAA  
AAGAAATGCTGCTTCTCGTCTGGGAGCTGGTCCTGGGGACGCTGGAGAAGTTCAAGCTCATCCATTCTTT  
AGACACATTAAGTGGGAAGAACTTCTGGCTCGAAAGGTGGAGCCCCCTTTAAACCTCTGTTGCAATCTG  
AAGAGGATGTAAGTCAGTTTGATTCCAAGTTTACACGTCAGACACCTGTCGACAGCCCAGATGACTCAAC  
TCTCAGTGAAAGTGCCAATCAGGTCTTTCTGGGTTTTACATATGTGGCTCCATCTGTACTTGAAAGTGTG  
AAAGAAAAGTTTTCTTTGAACCAAAAATCCGATCACCTCGAAGATTTATTGGCAGCCCACGAACACCTG  
TCAGCCCAGTCAAATTTCTCCTGGGGATTTCTGGGGAAGAGGTGCTTCGGCCAGCACAGCAAATCCTCA  
GACACCTGTGGAATACCAATGGAAACAAGTGGCATAGAGCAGATGGATGTGACAATGAGTGGGGAAGCA  
TCGGCACCCTTCCAATACGACAGCCGAAGTCTGGGCCATACAAAAACAAGCTTTTCCCATGATCTCCA  
AACGGCCAGAGCACCTGCGTATGAATCTATGACAGAGCAATGCTTTTAATGAATTTAAGGCAAAAAAGGT  
GGAGAGGGAGATGTGTGAGCATCCTGCAAGGTGAAACGACTCAAATGACAGTTTCAGAGAGTCAATGTC  
ATTACATAGAACACTTCAGACACAGGAAAAATAAACGTGGATTTTAAAAAATCAATCAATGGTGCAAAAA  
AAAACCTAAAGCAAAATAGTATTGCTGAACTCTTAGGCACATCAATTAATTGATTCTCGCGACATCTTC  
TCAACCTTATCAAGGATTTTCATGTTGATGACTCGAACTGACAGTATTAAGGGTAGGATGTTGCTTCTG  
AATCACTGTTGAGTTCTGATTGTGTTGAAGAAGGGTTATCCTTTCATTAGGCAAGTACAAAATTGCCTA  
TAATACTTGCAACTAAGGACAAATTAGCATGCAAGCTTGGTCAAACCTTTTCCAGCAAAATGGAAGCAA

GACAAAAGAACTTACCAATTGATGTTTTACGTGCAAACAACCTGAATCTTTTTTTATATAAATATATA  
TTTTTCAAATAGATTTTTGATTCAGCTCATTATGAAAAACATCCCAAACCTTAAAATGCGAAATTATTGG  
TTGGTGTGAAGAAAGCCAGACAACCTCTGTTTCTCTCTTGGTGAAATAATAAAATGCAAATGAATCATT  
GTAAACCACAGCTGTGGCTCGTTTGAGGGATTGGGGTGGACCTGGGGTTTATTTTCAGTAACCCAGCTGC  
AATACCTGTCTGTAATATGAGAAAAAAAAAATGAATCTATTTAATCATTTCTACTTGCACTGCTATG  
TGCTAAGCTTAACTGGAAGCCTTGGAATGGGCATAAGTTGTATGTCCTACATTCATCATTGTCCCGGGC  
CTGCATTGCACTGGAAAAAAAAATCGCCACCTGTTCTTACACCAGTATTTGGTTCAAGACACCAAATGTC  
TTCAGCCCATGGCTGAAGAACAACAGAAGAGAGTCAGGATAAAAAATACATACTGTGGTCGGCAAGGTGA  
GGGAGATAGGGATATCCAGGGGAAGAGGGTGTGCTGTGGCCCACTCTGTCTAATCTCTTTACAGCAA  
ATTGGTAAGATTTTCAGTTTTACTTCTTCTACTGTTTCTGCTGTCTACCTTCCTTATATTTTTTCTC  
AACAGTTTTAAAAAGAAAAAAGGTCTATTTTTTTTTCTCCTATACTTGGGCTACATTTTTTGATTGTAA  
AAATATTTGATGGCCTTTTGATGAATGTCTTCCACAGTAAAGAAAACTTAGTGGCTTAATTTAGGAAACA  
TGTTAACAGGACACTATGTTTTTGAAATTGTAACAAAATCTACATAAATGATTTACAGGTAAAAGAATA  
AAAATAAAGGTAACCTTTACCTTTCTTAAATATTTCTGCCTTAAAGAGAGCATTCCATGACTTTAGCTG  
GTGAAAGGGTTTAATATCTGCAGAGCTTTATAAAAAATATATTTCAAGTGCATACTGGTATAATAGATGATC  
ATGCAGTTGCAGTTGAGTTGTATCACCTTTTTGTTGTCTTTTATAATGTCTTCAGTCTGAGTGTGCAA  
AGTCAATTTGTAATATTTTGCAACCCTAGGATTTTTTAAATAGATGCTGCTTGCTATGTTTTCAAACCT  
TTTTGAGCCATAGGATCCAAGCCATAAAATCTTTATGCATGTTGAATTCAGTCAGAAAAGAGCAAGGCT  
TTGCTTTTTGAAATTGCAACTCAAATGAGATGGGATGAAATCCTATGACAGTAAGCAAAAACAGAACCAT  
GAAAAATGATTGGACATACACCTTTTCAATTGTGGCAATAATTGAAAGAATCGATAAAAGTTCATCTTG  
GACAGAAAGCCTTTAAAAAAAAAATCACTCCCTCTCCCCCTCCTCCCTATTGCAGCAGCCTACTGAGA  
ACTTTGACTGTTGCTGGTAAATTAGAAGCTACAATAATAATTAAGGGCAGAAATTATACTTAAAAAGTGC  
AGATCCTTGTTCTTTGACAATTTGTGATGTCTGAAAAACAGAACCCGAAAAGCTATGGTGATATGTACA  
GGCATTATTTCACTGTAAATGGCTGTGATACTCTTGATACTTGTTTTCAAATATGTTTACTAACTGT  
AGTGTTGACTGCCTGACCAAATCCAGTGAACTTATACACCAAAATATTCTTCCTAGGTCCTATTTGCT

AGTAACATGAGCACTGTGATTGGCTGGCTATAACCAACCCAGTTAAACCATTTTCATAATTAGTAGTGCC  
AGCAATAGTGGCAAACACTGCAACTTTTCTGCATAAAAAGCATTAAATTGCACAGCTACCATCCACACAAA  
TACATAGTTTTTCTGACTTCACATTTATTAAGTGAAATTTATTTCCCATGCTGTGGAAAGTTTATTGAGA  
ACTTGTTTCATAAATGGATATCCCTACTATGACTGTGAAAACATGTCAAGTGTCACATTAGTGTACAGA  
CAGAAAGCACACACCTATGCAATATGGCTTATCTATATTTATTTGTAAAAATCCAAGCATAGTTTAAAT  
ATGATGTCGATATTACTAGTCTTGAGTTTCTAAGAGGGTTCTTTATGTTATACCAGGTAAGTGTATAAAA  
GAGATTAAGTGCTTTTTTTTCATCACTTGATTATTTCTTTAAATCAGCTATTACAGGATATTTTTTTA  
TTTTATACATGCTGTTTTTTAATTAAATATAATCACTGAAGTTTACTAATTTGATTTTATAAGGTTTGT  
AGCATTACAGAATAACTAACTGGGATTTATAAACCAGCTGTGATTAACAATGTAAAGTATTAATTATTG  
AACTTTGAACCAGATTTTTAGGAAAATTATGTTCTTTTTCCCCCTTTATGGTCTTAACTAATTTGAATCC  
TTCAAGAAGGATTTTTCCATACTATTTTTTAAGATAGAAGATAATTTGTGGGCAGGGGTGGAGGATGCAT  
GTATGATACTCCATAAATTCAACATTCTTTACTATAGGTAATGAATGATTATAAACAAGATGCATCTTAG  
ATAGTATTAATATACTGAGCCTTGGATTATATATTTAATATAGGACCTATTTTGAATATTCAGTTAATCA  
TATGGTTCCTAGCTTACAAGGGCTAGATCTAAGATTATTTCCCATGAGAAATGTTGAATTTATGAAGAATA  
GATTTTAAGGCTTTGAAAATGGTTAATTTCTCAAAAACATCAATGTCCAAACATCTACCTTTTTTCATAG  
GAGTAGACACTAGCAAGCTGGACAACTATCACAAAAGTATTTGTCACACATAACCTGTGGTCTGTTGCT  
GATTAATACAGTACTTTTTCTTGTGTGATTCTTAACATTATAGCACAAAGTATTATCTCAGTGGATTATCC  
GGAATAACATCTGAAAGATGGGTTCATCTATGTTTGTGTTTGCTCTTTAACTATTGTTTCTCCTATCCC  
AAGTTCGCTTTGCATCTATCAGTAAATAAAATTCTTCAGCTGCCTTATTAGGAGTGCTATGAGGGTAACA  
CCTGTTCTGCTTTTCATCTTGATTTAGTTGACTGTATTATTTGATTTCCGATTGAATGAATGTAAATAG  
AAATTAAATGCAAATTTGAATGAACATAAATAGAAGTGATTTATTTTTTTATTATCTTAAAGATAGGAAG  
GAATTAGTATACGTATCAGGTGTATAAATGGTTTAAATTTATTTTAAACATGTCAGATGTGTTCAAGTTGT  
CATATAAATAAACTATGTATGTAAGGAATGGGTAAAA

>NM\_020761.3 Homo sapiens regulatory associated protein of MTOR complex 1 (RPTOR), transcript variant 1, mRNA

GTCCTGGCAATATGGCGTCCTCCTTGATGGGCTGATGAGATGAGTTTCACTGTAGCTCCAAACCAGAGGG  
CAAAGCTCCCATGACCCAATAAGCCCACATTGTCCCTTTCTCCGTGGTTCCGTGTCGCCC GTTTCTCAG  
GACTCGTTCTCAGGCAGGAGAGAGCCTCGGGGCTGAAGGCCAGGACCAGCCAGGCCGCGCGGACCTGAGG  
TTGAGGAACCGGGTGCAGGCGAGCACGATGGGCCGGTCGTGGCTCTGGTTGCAGCAGCTCAGACGAGTGC  
GGGACCCGCGAGGGCTGAGAGTGGCTGGAGGAGACCCAGGGCCCTTTGAACCCGATCCCTTGCCCGGAGAC  
CTCAGCCCAGTCGGCCAGTGGGCGAACCGGCACCAAGAGCGGCCTGCCTGTCTTCGGAAGTCTGAGGC  
GGTGGAGGCCGAGAGCAGGGTCATCGTGAGGCCTGAAGTCTCTTACGCTTTTGGCAGCTCCCTCGCAGC  
CCCTCTGGAAACGTACAGCCTCAGGAGCAGCCAGTGGCTTGGGACCTGGGGTGGTGTGTGTCTGCGGAGC  
TTCTTGGGCTGCCCCATTTCTAGCGGCCCCACCTCCCCACTTCCCGCTCAGAGTTAGAGATAAGGATC  
TCAGACTTTTGCCTGAGTAAGGGTCTCCGCACTCTTTATCCATTTGGTTTTCGATTTCCCGTTTTTGTTT  
CTTATTTACCAATTCTGGTACACGCTAGTTTTTAAGGCTGGAGGTTCTCGAGCGCTTGCTGCCAAGGAC  
TCCCCACCCCCTCCCCACTGATGGAGTCCGAAATGCTGCAATCGCCTCTTCTGGGCCTGGGGGAGGAA  
GATGAGGCTGATCTTACAGACTGGAACCTACCTTTGGCTTTTATGAAAAAGAGGCACTGTGAGAAAATTG  
AAGGCTCCAAATCCTTAGCTCAGAGCTGGAGGATGAAGGATCGGATGAAGACAGTCAGTGTTGCCTTAGT  
TTTGTGCCTGAATGTTGGTGTGGACCCTCCCGATGTGGTGAAGACCACGCCCTGTGCACGCTTGGAATGC  
TGGATCGATCCTCTGTCGATGGGTCTCAGAAAGCTCTGGAAACCATCGGTGCAAATTTACAGAAGCAGT  
ACGAGAACTGGCAGCCAAGGGCCCGGTACAAGCAGAGCCTTGACCCAACTGTGGATGAAGTCAAGAAGCT  
CTGCACGTCCTTACGTCGCAACGCCAAGGAGGAGCGAGTCCTCTTTCACTACAATGGCCACGGGGTGCCC  
CGGCCACAGTCAACGGGGAGGTCTGGGTCTTCAACAAGAACTACACGCAGTACATCCCTCTGTCCATAT  
ATGACCTGCAGACGTGGATGGGCAGCCCGTCGATCTTCGTCTACGACTGCTCCAATGCTGGCTTGATCGT  
CAAGTCCTTCAAGCAGTTCGCACTACAGCGGGAGCAGGAGCTGGAGGTAGCTGCAATCAACCCAAATCAC  
CCTCTTGCTCAGATGCCTTTGCCTCCGTGCGATGAAAACTGCATCCAGCTGGCAGCCTGCGAGGCCACCG

AGCTGCTGCCCATGATCCCCGACCTCCCGGCTGACCTATTACCTCCTGCCTCACCACCCCCATCAAGAT  
CGCCCTGCGCTGGTTTTGCATGCAGAAATGTGTCACTCTGGTGCCTGGCGTCACACTGGATTTGATAGAA  
AAGATCCCTGGCCGCTGAACGACAGGAGGACGCCCCGGGTGAACTGAACTGGATCTTCACAGCCATCA  
CAGACACCATCGCGTGGAACGTGCTCCCCGGGATCTCTTCCAAAAGCTCTTCAGACAGGACTTGCTGGT  
GGCTAGTCTGTTTCGAAATTTTTATTGGCGGAAAGGATTATGAGGTCGTATAACTGCACTCCCGTCAGC  
AGCCCGCGTCTGCCGCCACGTACATGCACGCCATGTGGCAAGCCTGGGACCTGGCTGTTGACATCTGTC  
TGTCTCAGCTGCCGACGATCATCGAGGAAGGCACTGCGTTTCGGCACAGCCCGTTCTTCGCCGAGCAGCT  
GACCGCATTCCAGGTGTGGCTCACCATGGGCGTGGAGAACCAGAAACCCACCCGAACAGCTGCCCATCGTC  
CTGCAGGTGCTGTAAAGCCAAGTGCACCGGCTGAGAGCATTGGACTTGCTTGGAAGATTTTTGGACCTGG  
GTCCCTGGGCAGTGAGCCTGGCCTTGTCTGTGCGCATCTTCCCCTACGTGCTGAAGCTGCTCCAGAGCTC  
GGCCCGAGAGCTGCGGCCACTTCTCGTTTTCATCTGGGCCAAGATCCTCGCAGTGGACAGCTCGTGCCAA  
GCGGACCTCGTGAAGGACAACGGCCACAAGTACTTCTGTGCGTCTGGCGGACCCCTACATGCCAGCTG  
AACACCGGACCATGACGGCTTTCATTCTCGCCGTGATCGTCAACAGCTATCACACGGGGCAGGAAGCCTG  
CCTTCAGGGAAACCTCATTGCCATCTGCCTGGAGCAGCTCAACGACCCGCACCCCTTGCTGCGCCAGTGG  
GTGGCCATCTGCCTCGGCAGGATCTGGCAGAACTTCGACTCGGCGAGGTGGTGCGGCGTGAGGGACAGCG  
CTCATGAGAAGCTCTACAGCCTCCTCTCCGACCCCATTCGAGGTCCGCTGCGCAGCGGTCTTCGCCCT  
TGGCACGTTCTGTTGGCAACTCTGCAGAGAGGACGGACCACTCCACCACCATCGACCACAACGTGGCCATG  
ATGCTGGCCCAGCTGGTCAGCGACGGGAGCCCCATGGTCCGGAAGGAGCTGGTGGTGGCTCTGAGTCATC  
TTGTGGTTCAGTATGAAAGCAATTTCTGCACCGTGGCCCTGCAGTTCATAGAAGAGGAAAAGAACTACGC  
CTTGCCTTCTCCAGCAACCACAGAGGGAGGGAGTTTGACCCAGTGCGAGACAGCCCGTGACCCCCAGA  
CTTCGTTCTGTGAGCTCCTATGGAACATCCGTGCTGTGCCACAGCCAGGAGCCTCAACAAATCTTTGC  
AGAACCTGAGTTTGACAGAGGAATCTGGTGGCGCGGTGGCGTTCTCCCCGGAACCTCAGCACCAGCAG  
CAGCGCCAGCAGCACCTGGGCAGCCCCGAGAATGAGGAGCATATCCTGTCCTTCGAGACCATCGACAAG  
ATGCGCCGCGCCAGCTCCTACTCCTCCCTCAACTCCCTCATCGGAGTTTCCTTAAACAGTGTTTAACTC  
AGATTTGGAGAGTCCTGCTGCACCTGGCTGCTGACCCCTATCCAGAGGTCTCGGACGTGGCCATGAAAGT

ACTCAACAGCATCGCCTACAAGGCCACCGTGAACGCCCCGGCCGCAGCGCGTCCTGGACACCTCCTCCCTC  
ACGCAGTCGGCCCCCGCCAGCCCCACCAACAAGGGCGTGACATCCACCAGGCGGGGGGCTCCCCTCCGG  
CGTCCAGCACCAGCAGCTCCAGCCTGACCAACGATGTGGCCAAGCAGCCGGTCAGCCGAGACTTGCCTTC  
TGGCCGGCCGGGCACCAACAGGCCCCGCTGGGGCGCAGTACACCCCTCACTCCCACCAGTTCCCCCGGACA  
CGGAAGATGTTTCGACAAGGGCCCCAGAGCAGACTGCGGACGACGCGGACGATGCTGCTGGACACAAAAGTT  
TCATCTCCGCCACGGTGCAGACGGGGTTCTGCGACTGGAGCGCCCGCTATTTTGCCAGCCCGTCATGAA  
GATCCCAGAAGAGCACGACCTGGAGAGTCAGATCCGCAAGGAGCGGGAGTGGCGGTTCTGCGAAACAGC  
CGTGTGAGGAGGCAGGCCCAGCAAGTCATTCAGAAGGGCATTACGAGATTGGACGACCAAATATTTCTGA  
ACAGGAACCCCGGCGTCCCCTCTGTGGTGAAATTCCACCCCTTCACGCCGTGCATCGCCGTAGCCGACAA  
GGACAGCATCTGCTTTTGGGACTGGGAGAAAAGGGGAGAAGCTGGATTATTTCCACAATGGGAACCCCTCGG  
TACACGAGGGTCACTGCCATGGAGTATCTGAACGGCCAGGACTGCTCGCTTCTGCTGACGGCCACAGACG  
ATGGTGCCATCAGGGTCTGGAAGAATTTTGTGATTTGGAAAAGAACCCAGAGATGGTGACCGCGTGGA  
GGGGCTCTCGGACATGCTGCCAACGACGCGAGGAGCTGGGATGGTGGTGGACTGGGAGCAGGAGACCGGC  
CTCCTCATGAGCTCAGGAGACGTGCGGATCGTCCGGATCTGGGACACAGACCGTGAGATGAAGGTGCAGG  
ACATCCCTACGGGCGCAGACAGCTGTGTGACGAGTCTGTCTGTGATTCCCACCGCTCACTCATCGTGGC  
TGGCCTCGGTGACGGCTCCATCCGCGTCTACGACAGAAGGATGGCACTCAGCGAATGCCGCGTCATGACG  
TACCGGGAGCACACAGCCTGGGTGGTGAAGGCCTCCCTGCAGAAGCGTCCCGACGGCCACATCGTGAGTG  
TGAGCGTCAATGGAGATGTGCGCATCTTTGATCCCCGGATGCCTGAGTCGGTAAATGTGCTTCAGATCGT  
GAAGGGGCTGACGGCCCTGGACATCCACCCCCAGGCGGACCTGATCGCATGTGGCTCCGTCAATCAGTTC  
ACCGCCATCTACAACAGCAGCGGAGAGCTCATCAACAACATCAAGTACTACGACGGCTTCATGGGCCAGC  
GGGTGCGGCCATCAGCTGCCTGGCCTTCCACCCGCACTGGCCTCACCTGGCCGTGGGAAGCAACGACTA  
CTACATCTCCGTGTACTCGGTGGAGAAGCGTGTGATAGCGGCGTGACCCGGGCCCCACCAGGCCACGGC  
CGCCTGCTGTACATAGTGAAGCTGTCACTCGCCGGGGCACGGGGCGTCGGCTGCTGCGGCCCCGAGTGT  
GAACGTTGGCTGCTGCCTTAGCTGCTGATGACGGCAGGAGGGCCCTGCTACTCGCTTTTGTCTGTCTTCG  
CTGTCGTGTCTGGAATGTCAGGGAAGGGGAGGGCTCGGGTTGACGGTGGCTTCCCACTGAGCACCAGCAT

CCAGGTGCACCCCCGCGGCCACGGCGCCTCTGTCCCTCTCCTGTTCTGTGTTTCTCTGAGACGCTGAAAG  
GGGAAACACCTCACTTTATTTCCATGTAATCAGAGCATTAGCTGCAGAAAAACCCCCGACAGAGCCCTG  
GCGGAGAGGCAGGCGCTGGGGCTCCTACGGGTCCCTGGGGCAGCTGTCCCATCAGGCCAAGAGCGAGCG  
AGAGGCGCTGCCCCAGCCAGGCCACCACTCTCACAGTCAGTGACGCAAGCAGGGACATTTCCTAGCC  
AGCTGGGGGACACTGGAAATTCGGGAAACCAAGAGAGAGGAAGAAGGAGACGCCCCCTCAACTGGCGGGT  
GTGAAGGAAGCCGCCCAGGGGTCCGGGCTGTCTTGCCGCTGGCAGCATCACTGAGCAGGAAGCGCACA  
GCCACCTCCCCGCACCTCCAGGTCTCTGGA CTCCAGTTTTGGCCCCTCTCACACAGAGCTGTCAGCAG  
GGGCGCTGTGGCGGTGCACAGGGGAGGCAGGTCTTGCGAGGTAGCCCCTGCCTTAATCCACGGGGCT  
CCTTCCCTCCGAAGGGCTGCTCTTCCCCACAGGCGCGGGGACAGCAGCCGACCTGTGGTCTCCATGCC  
TGTGCCCTCACACAGGTGTAGCACACGCATGTGCAGATGGCACCACGGCCGGCACCTGGGGGCACACACA  
TGCAGGCGGCGTGGTCTCCCTGCTCTGTCCCCACAGTTCCTCACATACAGGCAAGAGGCACTGCCGGGT  
CCCGGACGGCTCCGGGTGACACCAGCCCCGTCTCCAGCCTTGAGCCGCCATGCTGATGCGACCTCGGCT  
GACAGCTGGGCCTGTGGTGCAGACAGGAGCTGTGTGGACAGTCCCGCCCAGGAGGGGCCGAGGGCGTGT  
ATGAGCAGTTTTGCAAACAGAACACAACCACAATGATGGTATTTTGAAAAGTGTTCTTCCGTGTTTCGTC  
GGGAATCAGGATTATTGAGAGGTGAAGGAGCCAGGTGGCTTCATTCTGGCGGTGAGAGGCCACGACCAC  
GGGAGTGAGAGCTGGTGTGGCGAGGCCCGGCTCTCCTGCGGTGTGGCTGGTGGCCTGCCGTGGCCAAGAG  
CATCTTCTGGGTGGATGGAACCCTGCCTGGTCACATTTGGCCAGAGACACACCTGGCCCTCAGGGGGCTG  
AGCTGGAGACTGAGCTGGGGCTGGCCGGGACGTGACAAGGCAGGACAGAGGCGGCCCTCCGCTGCTCCT  
TTTTGGAATGCGAGCTCCCACCAGAAGAAGGTTCCGGCACGAATCCCATCCCCACGTCTGGGCCGAGAAA  
GCAGCCCGGGTCCGGAAGGTGTAGAGAGTCCCGGCCTCACTCAGCTCACAGGGCGTGCCAGGCGGCAACA  
CCAGAATCTTCCAGAAGCCCAGCTCCACCCGCACACGCAGCTTCCCATCCAGTCCTTCAACTCAATTCTT  
ACCCAACACGCGTTTCTGTTTGTGTTTGGAGACAAAATCACCACCTGTCAAAGGCAGGTGGCTCCAGAGGG  
GTCAAGACCCCCCCCCGCCCCGCTCCACCCTGGAGCCCACCCCCATGGGCACCGCGTGCCGCCTGCACG  
TGGGCTGTCTTCACAGGTCTGATGTGAAAATTCAATCACGACGTTAACCGGCTCGAGAGAGCGCCGGCCT  
AGAGGCTCATTATCTATTTATTTTACCAAACGCGAATTGAGACGGACTTTGACAAAACACGAAATGGTAA

TGTGAAGCTAAGAGCAGAGAGTGACCAACAGTAAACAACACGCGCAGA

>NM\_001145642.5 Homo sapiens rubicon autophagy regulator (RUBCN), transcript variant 1, mRNA

GCCACCGACACTCGCGGGCGACCAGAGCGGCCCCGCGCCGTGACTCGCTCCTAGCGGCCCTCGCAGGATC  
GGACGAGGCATTGCAGCCGCTGTGCTAGGCGCTCGCGAGGACCGCCGTTGTGAGCAGTTCGACTTTCCGC  
CCAAACTGGGGGATGCTAGACCGGGGCACCTCTGAATCTTATGCCTTCAGTGATATAATCCTCCGTGTC  
CTTCGAGTCCCTCCTGCTGCAGACAGGTCCCCTATACTTCGGTACACACGAGCCTTTCGCGCCCACCGCA  
ACGCAGCCTCGGGAGGCAGGACAGACCCCTGCGAGTGTAGATTGCAGCTGCATCCCAGCTCCCCCTCCC  
TGGCACGCTCCTCCACCTACAGCTGCGCTGAGCTGCCGCATCTGAACGCAAAGCAAACGCTGCAGTGACG  
GTTCTGCGTCACCTTAACTCCAAAGTAAATGCTAACGTTTCCCGTGTCTGTACCTTCTCTCAATCGGCA  
CTCTCAAAACATCTGGCACGGTGTTCACTACCTAATAAGACCTCAGCTTCCCTCGGGAGGGGAGGGAGC  
ACTGGCAGTTGCTGGGTAATTTGAAGACGACGGTGGAGGGTTTGGTATCAACCAACAGCCCCAACGTCTG  
GTCTAAGTATGGTGGCTTGGAGCGGCTTTCAGGGACATGCAGAGCATCCTCTATCACGGGCTTATCCGT  
GACCAGGCGTGCCGCCCGCCAGACGGATTACTGGCAGTTCGTGAAAGACATCCGGTGGCTCAGTCCCCACT  
CAGCCCTTCACGTGGAGAAGTTCATCAGCGTGCACGAGAACGACCAGAGCAGTGCTGATGGTGCCAGTGA  
ACGTGCTGTTGCCGAGCTGTGGCTGCAGCACAGCCTGCAGTACCACTGCCTCTCAGCCCAGCTCCGGCCC  
CTGCTCGGGGATAGACAGTATATCAGAAAATTCTACACAGATGCTGCCTTCCTGCTAAGTGACGCTCATG  
TCACGGCCATGCTGCAGTGCCTGGAAGCAGTGGAACAGAACAACCCCCGCCTCCTGGCTCAGATCGATGC  
GTCCATGTTTGCCAGAAAGCACGAGAGCCCCGCTCCTGGTGACAAAGAGCCAGAGCCTGACAGCCCTGCCC  
AGTTCCACATACACCCCTCCAAACAGCTATGCTCAGCATTCTACTTTGGGTCCTTCTCTAGCCTCCACC  
AATCCGTGCCCAACAATGGCTCAGAGAGAAGATCTACTTCCTTTCCACTCTCTGGCCCTCCCCGGAACC  
TCAAGAAAGCAGAGGGCACGTCTCACCAGCAGAGGATCAAACCATCCAAGCCCCCCCAGTTTCAGTCTCT  
GCACTAGCCAGGGATTCCCCTTGACCCCAAATGAAATGAGCTCCAGTACTCTGACCAGCCCCATAGAGG

CATCCTGGGTCAGCAGCCAGAATGATTCCCCAGGTGATGCCAGTGAGGGGCCTGAGTACCTGGCCATTGG  
CAACTTGGAACCCCGAGGCCGACTGCCAGCTGTCAGAGTCACAGCAGCAATGCCGAGAGCAGCAGTTCC  
AATTTGTTCTCCTCCAGCAGCTCCCAGAAGCCAGATTCTGCTGCCTCTTCCTTAGGGGACCAGGAAGGAG  
GTGGGGAGAGCCAGCTGTCCAGTGTCTCCGAGGTCCAGCTTCTCAGAGGGGCAGAACTCACTGTCAC  
CAGTGGGGCAAAGAAAAGCCACATTCGCTCCCATTCGGATACCAGCATTGCCTCCAGGGGAGCTCCAGGA  
GGCCCCAGGAATATCACCATTATAGTTGAAGATCCCATTCGAGAATCCTGCAATGATAAGGCGAAGTTGA  
GAGGCCCTTTGCCCTACTCTGGTCAAAGCAGTGAAGTCAGCACACCCAGCTCTCTGTACATGGAATATGA  
AGGTGGTCGGTACCTGTGCTCAGGGGAAGGCATGTTCCGAAGACCATCAGAAGGACAGTCCCTCATCAGC  
TACCTCTCTGAGCAAGACTTCGGCAGCTGTGCCGACCTGGAAAAGGAGAATGCCCACTTCAGCATCTCAG  
AGTCCTTAATTGCTGCCATCGAGCTAATGAAGTGCAACATGATGAGCCAGTGCCTAGAGGAGGAGGAAGT  
GGAAGAGGAAGACAGTGATAGAGAGATCCAGGAGCTGAAGCAGAAGATCCGCCTTCGGCGCCAGCAAATC  
CGCACCAAGAACCTGCTCCCCATGTACCAGGAGGCTGAGCACGGAAGCTTTCGGGTACCTCCAGCAGCT  
CCCAGTTCAGCTCACGTGATTCGGCACAGCTCTCTGACTCTGGCTCTGCTGATGAGGTTGATGAATTTGA  
AATCCAAGATGCTGACATCAGAAGGAACACAGCCTCAAGCAGCAAATCCTTCGTTTCCTCCAGTCCTTC  
TCCCACTGCTTCCTGCACTCCACGTCTGCTGAGGCGGTGGCCATGGGGCTCCTGAAGCAGTTTGAGGGGA  
TGCAGCTTCAGCCGCCTCGGAGCTGGAGTGGCTTGTCGCGAGCATGATGCCCCTCAGAAGCTCCTGCC  
CATTCTGACTCACTGCCCATCTACCGGATGACGGGCAGCACGCTGACATCTACAAGCTGCGGATTCGT  
GTTCTGGCAACTTGGAGTGGGCCCCGCCCCGGCCTCAGATAATTTTTAATGTTTCATCCAGCCCCAACGA  
GGAAAATTGCCGTGGCCAAGCAGAATTACCGCTGTGCAGGATGTGGCATCCGGAAGTACCTGATTACAT  
CAAGCGACTGCGGTACTGTGAGTACCTGGGCAAGTACTTCTGCCAGTGCTGCCACGAGAATGCCAGATG  
GCCATCCCCAGCCGGGTTCTGCGCAAGTGGGACTTCAGCAAGTACTACGTGAGCAACTTCTCCAAGGACC  
TGCTCATTAAGATCTGGAATGATCCTCTCTTCAACGTGCAGGACATAAACAGTGCCCTCTATAGGAAGGT  
CAAGCTGCTCAATCAAGTCCGGCTGCTGCGGGTCCAGCTGTGTCACATGAAGAACATGTTCAAGACTTGC  
CGACTGGCCAAGGAGCTTCTGGATTCTTTGACACAGTCCCAGGCCACCTGACAGAGGACCTCCACCTGT  
ACTCACTGAATGACCTGACTGCGACCAGGAAGGGGGAGCTGGGGCCCCGGCTTGCTGAGCTCACCAGGGC

AGGGGCTACCCATGTGGAGAGATGCATGCTCTGCCAAGCCAAAGGCTTCATCTGTGAGTTCTGTCAGAAT  
GAGGATGACATCATCTTTCCCTTTGAGCTCCATAAGTGCCGGACCTGTGAAGAGTGTAAGCGTGTTACC  
ATAAAGCCTGCTTCAAGTCTGGAAGCTGTCCGCGCTGCGAGCGGCTGCAGGCCCCGGCGGGAGGCACTGGC  
CAGGCAGAGCCTGGAGTCTTACCTGTCAGACTACGAGGAGGAGCCCCGCGGAAGCGCTGGCCCTGGAAGCC  
GCCGTCCTGGAGGCCACCTGAAGAAAGCACGTGCAGCCCTCCCTCCGGGCCGGGTACACCTGTTGCAGA  
ACTGAGCCACTCTTTGAAGGACTCGCCCCACCTGGGGCTTCTTTTTTTTTTTTTTTTTTAATTATCATC  
ATCTTTTTTTTTTTTTTACTGACTTGTCTGACGTCTGTGTGCAGTCAGCCGTCGGCAGGTTGATGGGTC  
CAGAGTCTGTGGTGACAGATAATTTGTAAACACCAGGTGTTTCCATCAGAACTGACATGCGGGTCCTTCA  
GTGAAGCTTCTAGTGCCTCTGTCAGTGGAAGAGACAGCAAGACCAAGTTCTTCCAGCGTCTGTGGCCTTC  
TCCTCTAGGTTTCACCTGCATGTCAGGTATCATTTCCAATTTTCTTTGTTTCAGTTCTGGAGCTTCTGA  
GCCAGGCCTTTCTCAACCACCTCTCCTGCTGCTGAAACGGGGATGGCGTTTTCCCTCTCCCTGTCCTGGA  
CTGGGGTCAGACTGTGCCCCGAGGAGAAGCAGCAGAGAATAGGACTACGTCATGGGCATTTCTGCCACTT  
ATTTGGGTATTTTGGGGGCCACAGAACAATCCTGACTATCCTAGACTCCTCAGAGACCTCAGAGGCAGCT  
GTGAATGTCCCTATGTTGCCGGGAGTTCCTGTTTGAAATATTTGAAGCATAGAGGATGCCACAAGCTGAC  
TTTCTTCATCTACCTTGGTGATCTTGAAGCAAAGAACAGAACTGATGCTCAGGCCAGGCTCACCTGTAGC  
CTTACGCCGCAAGCATACGTGAGGCGCCAGCTCTGTGCTGAAGGAGCGCTTACTCAGAGGAGCGGTCGG  
CCCCCTCTGGTGTTAAGGTCTCTTAGTTAACCTGGCTTTTTGGTGCAAGGTGTGATCTTTGAAGCTCAGG  
CAGGTCCCTGATGCCATCCTAAGGTGAGGACAGGAACCTCACCCACCATCTTCTTAGCGTGTCCCTGATG  
ACTCTGTCCTCTGTTAGATGGTCGTTGTGCTTCTGAGTAAAAGTACAACCCGACTCCGTTCTCTCCCCTT  
CCTGCAGCAGAGCTGGGTCCTTCCCTGGTGGCCGAGTCTCTTGCCTTAGCTTCTTTGGTCAAAGTTGG  
AGAAAAGCTTCTGCTATTAGTGCTGTTACAGAACTTGACGGTTTGTGGATGTGAGTGTGAATGTCCCTG  
TGTTCTTGGGATAACAAGAGCCTTTATGCCAATTATGCACTTAACTCTGTGTAGCCTGGTAATGTTTATC  
TGTTCAATTTGATAATGCTGATTTTAGTGTGCTGCCCCCTCCCCCGTTAATGTGTGTTGATGGTGAAGT  
CCTTTTGATAATGCTGATTTTGGTGTGCTGCCTCCCCCTCCCCCGTTAATGTGTGTGTTGACAGTGA  
AGTCCTTGGGTGGGGCCATGTGTGTGTTGTGATGTTCTTAAGTTGATGCAGCTTCTAACCTCTGTGAA

AACACTGGTCAGAGTGGCTTCTCCAAGAGCTGGCAGCTCTGTGAACTAAAGCCTGCATCATTTTTGTTCT  
GGGATTGAATTCTGCCCATGGGCATGTCTTCTCATAGTTGCTTGCTGGTAGGAAAGAAATGGGCGTGGGT  
GCTGCCCTGGAAGCTGAGCGGAAAGTTGCCTGTGGTTGGTGGAAGCTGATGAGAGCTTGAGCTGGCGGTA  
AGAAGGAGTCTCCAGGGAAAGTGGGAGAGGCATTAAGGTGATGGCCAGGGCTGAGGCTCCACCAGCGTGA  
GAGGGAACATGTGGGAACTGGCCCCTGCCCTTGATTCTCTGCCTCAAAGTTGGGATCTGAAAGCCATGT  
AGGGCTAGAAGACCCTGAGGCTGTTCTCCCTTCTGTTTCATAGTGAGACTCAAAAAGCCAAGTCCCAGAAG  
TTCTGAAGGGCTGTGACTAGAAGTGCCCAGGTCCTTCAGGGAGCTTTAAGAATGACCCACAGAACTCAA  
GTTTAACTAGGGGTTAGGTCCCAGATTGAGACCCAGGAGTTTATAAAAATGAGCTCTACTTCCAGTTTTG  
GTTTAAATTACACATCCAGGCCAGGCACAGTGGCTCACACCTGTAATCCCAGCACTTTGGGAGGCCAGTG  
CGGGCGGATCATGAGGTCAGGAGTTTGAGACCAGCCTGGCCAATGTGGTGAAACCCTGTCTCTTCCAAAA  
ATACAAAAATTAGCTGGGCGTGGTGGCACACGCCTGTAATCCCAGCTACTTGGGAGGCTGAGGCAGGAGA  
ATCGCTGAACCTGGGAGGCAGAGGTTGCAGTGAGCCGAGATTGCGCCACCGCACTCCAGCCTGGGTGAC  
AGAGTGAGACTCCGTCTCAAAAAACAAAAAGGTGACACATCCAGCTCTTCTCCAGGTCCTGCGCTGGA  
GGACAGATGTGCCGTCTTGCTCTGCCTGTTTCACATCAGCATAGGATCAAAGGATGACAATGCTGACAGC  
TTCTGAAGCCGAACTCAACAGTCTCATAGGCTCCTCACTTGCTCACTTATTTTTCCCTAGCTCCCTCAACC  
GCACCCCATCCCTTTAGATCGTGCGTCTGTTTTAGTGACTCTGACACGATGCCGTCTCACCTTCCAAAT  
ACCCAGTTATTTATTCAAGAGGGGGGAAGTGGGTAGAGGATGGGATGTTTTGGAAGCACTTTGCAAGTTA  
CCACTATCTGAAAATCCCCTGCTGTTGCGGGGAGAAGCTTTGAATGCACTGAAGAGAATTCTTCTAAAT  
GAAGGCAGGTGATAGTGTTCTTTCTGTAAGTAAAGGGAAAGAAAAAAACATAGTTTGCTTACCAGGTGG  
AGACAAGATTCAAGACATAGCAGAAGAGTGGAAGACAAATATTTTCCACTTAAATGAGGCTGTTTTTGAC  
GTTCTCTGCCAAGGATTTAGAGCTTTCGTTGAACTAACATAAAAGGAGTGCGAGTCTTAGTAGAGATGTT  
CCGTGTGTGCCGCCGTGCTCTGAACTGCGTTTCCACCTGCTGTGGTGCTTGTGCAGCCTGGCAGTTCAT  
TGTCATCTTTAATAAACTAAGGAAATAAAATTCTGTCTTTCGTCAGCCTGCCTTGACTGTCAAGAAATGG  
CATGTGTCCACTGTAAAGCAGGTATATCTGAACATTGAGAAGGTTTCTGTGTTATAATGTAAAGCAAAT  
GGACCACACACATCAAGGAAAGTGAGGTGGAGTGGCTGTGTCTCTAACTTGCCATGAGACCTCGAGCGAA

CCACTTCACTTCTCTGGGTTTCTGGTGCATGGTGTAACTGTCACTTAAAATGAGGTGTCTTCTCTCCGC  
AACATCTGACTTGCCTTAGATGCTTCAGTTCCCACTTCTGTGAGCAGCTAGCATCTTTCTTTCTGCTCC  
TGGCCCACTGGAGCTCCAGCTCTACGCTGCAACTCTCTCAACATTTCCCCTTAAATGTCCCCTTGTATC  
TCCAACCAGTGTGTCTAAAACCAGCATAAATTCCGTATTTCCAAAAACCTAACCATTAGTCACCCAGGTT  
TGAAAATTAATTGTCTTCAACTTCTCTGTAAAGTGGCACACTGAGCTCATCACGCATCGTCTCATTCTTA  
CTCCCTGTCATCAAGTTCTGTGGATGTTTTCTCTAAAATAAATCTCTCATTACTTTTCTGCCACTAGCA  
CACAAATTCAGGTGTTCTTGATCATAATTATTTTCTCCCTGCGCCTCAGTGGAACAATGATTAGAAGC  
ACCTTGTGGGATGAGGAGCCGGGCGCGGTGGCTCACGAGTGTATCCAGTACTTTGAGAGACCAAGGCAG  
GGGGATCACCTGAGGTCAGGAATTCAGACCAGCCTGGCTAACATCACAAAACCTCATCTCTACAAAAAT  
ATAAAAATTAGCCAGGCATGGTGGCATGTGCTTGTAATCCAGCTACTCGGGAGGCTGAATCATGAGAAT  
CACTTGAACCTGGAAGGCGAGGGCTGCAGTGAGCCAAGCTTGCTCCATTGCACTCCATCCTGGATGAAGA  
GCGAGACCCTGTCTCAAAAAACAAAAACAAAAAAGCACCAGCACACTGTGGCATGAGGGGCGGG  
ATTGTGACCACCTCTACCTCCCCTCTTAGTGCTCACCAAGTCTCTGCAGTAGTGAGCGTGTCTCATCTC  
CTGTCTTCTCCCTCAGCTACTTTGTCTGCAACTGCTCCTGTTGTGTTTGTCCAGCAGTCATCATCAGAGG  
ACACACATCCCAAATGTCCTTCAGTCACTTTATTATTAAACTGCCAGCTCTTTCCTTGCCAGGGACTAAA  
CCAGGAGATAAGATGATATTTATATGCTGTAAACACACCCTACATATTTAAAAATCTTCATATTACAAA  
TTAAACTGAGAGGAGAATGAAAAAGCCATGTGAAAGACTGCTGAAGTTGATAAAATGTTCAAATGTTTTT  
CAACTAGAGATAGGAAAATAGCTTACAGTACAAAACCTTCACTTTGTTCTAAGGCCCTTTTGTTCATTGT  
TACAAACTGGTGTAGTTCACAGGAAGCCAAAGCTTGATTTCCAGTAAGTTCCCAAACCTCTGTTCTCAAC  
ATTTAACTTAGATTTTAGATGATCATATTCCAAAATTGGAAAGACTGTTGAAGAGGAAAACAAGGACCAT  
TGATTACAATGGCAGCCCAGCATTTATTTATTCAATCATCCGTCAATCCCAAACATCTATAGATG  
CCTCCGTGTTCCAGACACCATGCCAGAGCTGAGAGTACAAAGAATCACAGAATATTGTTTAAAGATGTTT  
ACTGCAGCATAATTTATGAAAGTAAAAAGTTAATGGAAAATAAAAAAATTGATGCAACCATCAAAATGAC  
AGTTATAAAAATTATGATAGTGAGCCGCACACAGTGGCTCACGCCTGTAATCCAGCACTTTGGGAGGCC  
GAGGCGGGCGGATCACGAGGTCAAGAGATTGGGACCATCCTGGCCAACATGGTGAAACCTGTCTCTACT

AAAAATACAAAAGCTAGTTGGGCATGATGGCGGGCGCCTGTAATCCCAGCTACTCGCGAGGTTGAGACAG  
GAGAATTGCTTGAACCCGGGTGGCGGAGGTTGCAGTGAGCCGAGATCACGCCACTGCACTCCACCCTGGG  
CAACAGAGTGGGACTCTGTCTCAAACAAAAAATAAATTATGATAGTAACATGGGGAAAAAGTCTTGTA  
TACAATGTTATGTGAGAAGAAGTTAGAAAAAGTGATGTCAAATATATATTTATTAGTCCATACATACAT  
AAATAAATGACCAAATAAATAAATTCTCACAGAAGAATTCTAAACAAAATACGTAAATTCTCCCAGGAGG  
TGGAGTTTAATTCCTTCTCCATTGAGGGTGGACTGGAATTAGTGATTCACCTTTTTTAAATAAAAGGATA  
TAGAAAGAGGAAAAATAGCAACTTTAGAGTAGAGAGAGCTAACACGACCTTAACCAAGTAATCAACGTAA  
CATCTCCAAAGATGTCATTGGATGTCATGTACCTACTAATAACAATGAAAGGGGTACATCTTCCCTGACAT  
TCATTGAGAAACCCATAACCTCAGTCTAATCATGAGAAAAACAACAAACATAAACACAGGAGCAAAA  
TTCGAGGAACCTTCTACAAAACACTTGACCCTACTCAAATTGCCAAGGTCTCGAAAACAAGGAAAGAGA  
TGCCGTCACGGACGAGAGGAGACTAAGCAGATACGATGACTGAATGCCATGTGGGATCCCGGGTGGGATC  
CCGAAATGGAGAAAGGATATTAGTGAAAAAACTGGCAAATCTGAATACAATTTGGAGTTTAGTTAAAAG  
TAACATACCAATGTTGGTTCCTTAGTTTTGGGAAATGTCCAGTACTACAGTAATGTAAGATGGTAACATT  
AGGGAGAGCTGAAATCGGGTGAGGGCTATGTGACGAATTTGTACTATCTTTGCAACTTTACTGTGGATCT  
AAAATTATTCCAGATTAAGAAGTTTACCTATATAAAAAGCATATGTACATCATAATTACAGTTATGCAA  
AATATGGTTAGAAAAAATACATAAGGAAAAACATACGTAAAAATTAGTGTGGTTCTGTTAGAATGGTGGCA  
TTGTGGAGTATTTTTCTCTTATCTGCTTACTGAATTAGCTGTAAATGAGTCATTTTCCATAAATTA  
GAGTTAATTTTA

>NM\_001142648.2 Homo sapiens secretion associated Ras related GTPase 1A (SAR1A), transcript variant 1, mRNA

GTACATCCGGCGAGTAGCTGGCGGTCCCGGGTGCTGCTGGTTAGTGTGCTCTGAGGGAGGGTCCGAGCCA  
GCCGCTGTTTTGCCGAGGAGCCCCTCAGGCCGGCTGCTTCCAACCTTCAATTTGTAACAAAAACCAGAAA  
ACCTCAGGATCCACAAAGTATCATCAAATGAGGTAGTAAGCATTAAATGTCTTTCATCTTTGAGTGGA

TCTACAATGGCTTCAGCAGTGTGCTCCAGTTCCTAGGACTGTACAAGAAATCTGGAAAACCTGTATTCTT  
AGGTTTGGATAATGCAGGCCAAAACCACTCTTCTTCACATGCTCAAAGATGACAGATTGGGCCAACATGTT  
CCAACACTACATCCGACATCAGAAGAGCTAACAATTGCTGGAATGACCTTTACAACCTTTGATCTTGGTG  
GGCACGAGCAAGCACGTCGCGTTTGGAAAAATTATCTCCAGCAATTAATGGGATTGTCTTTCTGGTGGA  
CTGTGCAGATCATTCTCGCCTCGTGGAATCCAAAGTTGAGCTTAATGCTTTAATGACTGATGAAACAATA  
TCCAATGTGCCAATCCTTATCTTGGGTAACAAAATTGACAGAACAGATGCAATCAGTGAAGAAAACTCC  
GTGAGATATTTGGGCTTTATGGACAGACCACAGGAAAGGGGAATGTGACCCTGAAGGAGCTGAATGCTCG  
CCCCATGGAAGTGTTTCATGTGCAGTGTGCTCAAGAGGCAAGGTTACGGCGAGGGTTTCCGCTGGCTCTCC  
CAGTATATTGACTGATGTTTGGACGGTGAAAATAAAAGAGTTTTACTTCTCTGGACTGATCCTATTCACA  
GCTTCCTCATGAACTTTTCTAATAGAACAAGGAAAGCTCTCCAACCATGTCTGGCGTTGAGAAGCCAAGA  
GTCTCTGTCAACTCTCTCATTGCCAGTGGTGACATGTGCTCTTCTCCACACTGTTGGGAGGTAATGCTG  
CCCCACGTGCTGGTGCAGGTCAGTATCCTGGGACTTGGAAGCTGGCAGGATTGCGGGTAAAGCTGTAT  
GCCATCATGGGGCACCTGAAAAGAAAAACACGTCTCACCCTGTGGTTGATTCAAAGAAAGTGATTCTA  
TTTTTTAAAGAAAGCGTTGTTAATGTAATTGGTATCCCTCCTAACTTTTTGAGTTCACAATTTACTTGGT  
CCAGAGTTTTCTATTCTTTTTTTTTTTAACTAATGAATGACATTTAGATACTTCATAAAATTATGAAC  
AGATATGGAGGCCAGAGCTCATTTGGGTAACTTACTCCTGCTGAGTTAGCAGGTTGGTGAGAGAAGCTC  
CCCTGAGCTCACCTGTCTCTGACTGCCTTGGAGTAGGTGGCATAACCTTGTGCACAGAGAACTAGAAA  
AGGGGCAGAACCCCGCCTTGCAGTTGTGGCAGGTTTCCACTGTGGTAAGCTAGGTTCAATCCTCATCAA  
GGAATGTGTAGCAGATTGTTCACTGTGGAGGAGTTAATTATAGAATGGGTATTGTTGTTATTCTTACTC  
ATGAAGTTACAGATTTTAGCCAGTCTTTGCTTTTATACTTTGTGAAATTTAATTTCTCTCTATAGCACC  
TTCCTTTTTCGTTTTCAGTTATCAAAGTGACTTTGACCTCATAAAAGAGTTGAGAACATCTCTCGTGTC  
ACATACTGCAGGTGCATCAGTTACTTTGCACAGATTCTAGGGGGACATTTTCTGAATAGGAAGACAGG  
ACAAAGTTAACAGCTTAAGGGCTCTTAATTCTGTGAGTTGAGGACTTAAAAGTATTGTAGCATTTGTTTG  
GATCCATGAAAAATGTATTAGTGGGCTTTAAATTTCCATTTGCAGAAATTTGGTCTCTCAGGCTGTTTG  
GGAGCTCTTTTTTTTACATTTTTTCTCCTTTGACACCTATTTTATTGGTGTTTAAAGTAAAGGTAAACAT

CTGTAGCTTTTCCAGGTTTTTTTTTTTTTTTTTTTTTTTTTTGGTATGAAATTGTCTTTCTCCATTGCAGA  
AATAAGCTAGGGAAACACTAACCCAAAACTTTCTGTAGAGCTGTTCTTTGGAGGCAGCATCACTTATT  
GGCAGTAAAGACTCAGTATAAAAGCACCGGCATCCCTACTTGGGTGATGGGGATTAATTTTATAGCATTC  
CATTTTCCTAGTGCCACATGTGAAATTGGATTTTGATGATCTTAATCTATATTCTACCTTATAATAAAA  
GATCAAAAGATATATCTCCTATGAACAGATTGGAGATAGGAGATGAAAAGTTGGGAGGATGTCTTTATTC  
TAATGTGAGGGTAGGGAAAATGTGGATAACATTACTGGGGTGAGGGAGGCATTGTTCTTTAGTTGGAGTT  
CTCATTCTTATTCTCCAGTACTGACTTGTGGGGAAAGCATACTTTTCACTGCCAGGTAATGCAGA  
GGCTCAGTGAAGTATATATGTGGGAAGTGCATGCATTTCTTTATTAGCAAACATAGCTGGATTAAGACA  
AAGTTGTTGGTTTGAAAGGGGTAAAGCCTTAAGTGAACAAATCTAGCTAACAGTGAATGAACTAGGTA  
ATATAACTTGCATATTTTAAATTCCTTTGGTTAAAGGTCCCCATACTTCTCTGTTCTGGAGACATGAGA  
AGTATGATTACTTCAGTGTTAGTTTTCTTAATTTTTTTTTTCCCCTATTTGTCCCTTGTCATTTGTTGC  
AAGCTAGAAATCTGTGGGTATACATAGGGCAGCTCTTTGTGAAAGTGGTTTATTCCACTGGAGAAAGGG  
GATTGAAAATCAGTTAGAACCAATGTATTTCTTGCCCCACGGAACACTATTCTATAAGATAGCTGAAAG  
AAGCTGCTGTGAGGAGCTCAGCTCCAAACACAGGATCAGCACCTTGATAGGAATTCCCATGAATTATGA  
CTTCTCATTCTGTTTTATCAGAGTGCATATATGTCCTACTTCAGGAAAAGTAAAACAGTCATTTACGAAA  
GAAAGTCAATCTGTATCCTAAGCATTTTAATAAAAAAGTTAAAAACAAATACGCTATTTCTTTTTTTTTT  
TCATTGGTTTGTCTGAGCTCTGAGTTTGAACAATGCCGTTTATTTGGGGAGGCAACCAAAAGTTCCTG  
CATAGAGGAAGAGACATTTAGGGTGCGTGTGAGATACTTGAATTTGCCACCAGGAGGGGGAAAAAGGCT  
GGGGTACTAGAAGTAATAGATTTAGTACTACTTGAGAGATTTGGAACATGCTGTGGACCCAGGGTTGTTG  
GTCATCTCTGCAACAGGATGGGGATGGCAGATGTTTGAGCAAAATCTATATTAACATGCTAGCAAGGACT  
AGTTCTAGTTTAGCTGTGTTTCACTCATTTTACACAGAATTAGAATTGGCCAGGTGTGGTGGCTCACGCT  
GTAATCCTAGCACTTTGGGAGGCTGAGGTGGGTGGATTGTCTGAGCTCAGGAGTTTGAGACCAGCCTGGG  
GAACAGGGTGAAACCCCATCACTACTAAAATACAAAAAATTAGCTGGGCATTGTGGTACATGGAGTAGC  
TCCCAGCTACTCTGGAGGCTGAGGCGGAGAATCGCTTGAAGTAGGAGGTGGAGATTGAAGTGAGCCGAGA  
TCATGCCACTGTACTCCTGCCTGGGTGACAGAGCAAGACTCTCTCTAGCTCAAAAAAAAAAAAAAAAAA

AAATCAATTAAATGCTACATTTGGCAAAATGAGAAAGAAAGAATTCCTTTACTAGGCTTGTAGGAAGAC  
TGCTTTTACAAAAACCCAAATGAGATCATAAACTAAAGTACTGGGACAAACAGTGGGAAACAGTGCAAT  
GGGTTCTTTTCAACCAAGTATTAAAGTATTGGAGATATTGCCGGGCGCGGTGGCTCACGTCTGTAATCCT  
AGCGCTTTGGGAGGCCAAGGCGGGCGGGTCATGAGGTCAGGAGTTCAAGGCCAGCCTGACCAACATGGCA  
GAGCTCCGTCTCTACTAAAAATACAAAAATTAGCCAGGCACGGTGGGACGCACCTTTAATCCCAGCTACT  
CAGGAGGCTGAAGCAGGAGAATCGCTTGAATCGGGGAAGCGGAGGTTGCAGTGAGCCGAGATCGCGCCAC  
TGCACTCCAGCCTGGGTGACTCCCATCTCAAAAAAATAAAAAAGTACTGGAGGTGTCCTGTTGTCCTTGT  
TACTGTGAAAGGATGCCATGGGTTGTATGGGCAAATGAGTTGTTTTGTTTGAGGCAGAGTGAAAAATAAG  
ATTAGGCTCAGTCCATGAGCCTAGCACTCAACAGATCTTACTTTGGCGTTCTGGCTGTGACTTGGGACTT  
CTTTTTACCATGGTCTGCTGTAAACACAGAAAAACCCAATGCCTAACAGTTCATGCTGGAGTCTTGAGCG  
TTGAGGGAGAATCACTGGACTCGAGAGAGAAAGTTTGTGTTGTTGTTGTTGTTGTTGTTTTTGAGTTGG  
TCTCACTCTGTCGCCCAGGCTGGAGTGCAGTGGTATGAACATAGGTCACTGCAGCCTTGACCTCCTGGGC  
TTAAGTGATCCTCCCATCTCAGCCTCCCAAGTAGCTTGGGACCACAGGGTTGCACCACCGTGCTCAGCTA  
GTTTTCAAAATTTTTGTAGAGTTAAGGTCTCATCATGTTGCCCAGGCTGGTCTCAAACCTCCTGGGCTCAG  
GAAATTCTCCTACCTCAGCCTCCCAACGTGCTGGGATTCCAAGTGTGAGCCCCTGTGCTCCACCAAGAGA  
AAAACCTCTTTGATTGCTAGGAAGTTGGGATAAAGAAATTGTGCTGTGATCAAGCCACCTTCTGTGTCATA  
GAACCAAAGAAGACCGCTGCTATGGCAAGATGGCCTAATTTTATTCCTGCCTCATACTATCATGGATA  
ATCGTTTTCTTTCTCTAGCAGGTTTGTGTCAGTGGGAGTACTGGGAGCATTATCCTGTGTTGTGCTGGG  
GTTATACCAAGCAGTGTTAACTTTATTTAAAGAATTCAGGCAGAAAGATTAGAGAATTTAAGTAGCAATT  
GTATATGGTAAGCAATACAGTAACCTTAATAAAAAATTAATGATGGCCGGGTACGGTGGCTCACGCCTGTA  
ATCCAGCACTTTGGGAGGCCGAGGCGGGCGGATCACAAGGTCAGGAGATCGAGACCATCCTGGCTAACA  
CGGTGAAACCCGTCTCTACTAAAAATACAAAAAATTAGCTGGGCGTGGTGGCAGGCGCCTGTAGTCCCA  
GCGACTGGGGAGGCTGAGGCAGGAGAATAGCGTGAACCCAGGAGGCGGAGTTTGCAGTGAGCGGAGATCG  
CACCATTGCACTCCAGCCTGGGCGACAGAGCGAGACTCCGTCTCAAAAAAATAAATAAATAAATAAAAAA  
TAATGTGTATTTTATCAATTCAGTGATAAAGCAGACCTTTGTAACTGTCTAGCTTGTGGTGACTGATTG

AGGGTATCATGAAGCTCCGCGCCCCCCCCACTCCCCGACATACTCGTTCATCCTCCTCTGTCCTAAAGCGT  
ACTTCTTTGAAAAAGTAGAGCAGTTTATGTTAGTGTACACTAGAGATGGTAAACTATGCCTTGTGGGTCA  
AATCGGGCCTGCTGCCTGTGTTTGTATGGCCTGTGAGCAAAGAAAGGTTTTTACATATTTAAATGGTTGG  
AAAAAATATTTAAAGAATGCTATTTTTGGACACAAAAAATTGTATGAAATTTAAATTTCAATGTCTGTAT  
CTTTTTATTGGGACACAGCCACCGCCATTCTTTAGCTTTTGTATGCAACAGCTGCAGAGTTGACTATTT  
GAGACAAGTTGTATGGTCCCCCAAAGTGGAACTGTTTCCATTCTGGCCTTCTACAGAAAGTATTTGGAC  
CCTGGCCTAGATAAATCCTGGCTGGTGGTTATGTTATGTGAAATGTGCACACTGTAAAATATAGGCCTGT  
ATGATTAATTTTGGATTCA

>NM\_001002235.3 Homo sapiens serpin family A member 1 (SERPINA1), transcript variant 3, mRNA

AGAGTCCTGAGCTGAACCAAGAAGGAGGAGGGGGTCTGGGCCTCCGAGGAAGGCCTAGCCGCTGCTGCTGC  
CAGGAATTCCAGGTTGGAGGGGCGGCAACCTCCTGCCAGCCTTCAGGCCACTCTCCTGTGCCTGCCAGAA  
GAGACAGAGCTTGAGGAGAGCTTGAGGAGAGCAGGAAAGGACAATGCCGTCTTCTGTCTCGTGGGGCATC  
CTCCTGCTGGCAGGCCTGTGCTGCCTGGTCCCTGTCTCCCTGGCTGAGGATCCCCAGGGAGATGCTGCCC  
AGAAGACAGATACATCCCACCATGATCAGGATCACCCAACCTTCAACAAGATCACCCCCAACCTGGCTGA  
GTTGCGCTTCAGCCTATACCGCCAGCTGGCACACCAGTCCAACAGCACCAATATCTTCTTCTCCCCAGTG  
AGCATCGCTACAGCCTTTGCAATGCTCTCCCTGGGGACCAAGGCTGACACTCACGATGAAATCCTGGAGG  
GCCTGAATTTCAACCTCACGGAGATTCCGGAGGCTCAGATCCATGAAGGCTTCAGGAACTCCTCCGTAC  
CCTCAACCAGCCAGACAGCCAGCTCCAGCTGACCACCGGCAATGGCCTGTTCTCAGCGAGGGCCTGAAG  
CTAGTGGATAAGTTTTTGGAGGATGTTAAAAAGTTGTACCACTCAGAAGCCTTCACTGTCAACTTCGGGG  
ACACCGAAGAGGCCAAGAAACAGATCAACGATTACGTGGAGAAGGGTACTCAAGGGAAAATTGTGGATT  
GGTCAAGGAGCTTGACAGAGACACAGTTTTTGTCTGGTGAATTACATCTTCTTTAAAGGCAAATGGGAG  
AGACCCTTTGAAGTCAAGGACACCGAGGAAGAGGACTTCACGTGGACCAGGTGACCACCGTGAAGGTGC

CTATGATGAAGCGTTTAGGCATGTTTAACATCCAGCACTGTAGAAGCTGTCCAGCTGGGTGCTGCTGAT  
GAAATACCTGGGCAATGCCACCGCCATCTTCTCCTGCCTGATGAGGGGAACTACAGCACCTGGAAAAT  
GAACTACCCACGATATCATCACCAAGTTCCTGGAAAATGAAGACAGAAGGTCTGCCAGCTTACATTTAC  
CCAAACTGTCCATTACTGGAACCTATGATCTGAAGAGCGTCCTGGGTCAACTGGGCATCACTAAGGTCTT  
CAGCAATGGGGCTGACCTCTCCGGGGTCACAGAGGAGGCACCCCTGAAGCTCTCAAGGCCGTGCATAAG  
GCTGTGCTGACCATCGACGAGAAAGGGACTGAAGCTGCTGGGGCCATGTTTTTAGAGGCCATACCCATGT  
CTATCCCCCGAGGTCAAGTTCAACAAACCCTTTGTCTTCTTAATGATTGAACAAAATACCAAGTCTCC  
CCTCTTCATGGGAAAAGTGGTGAATCCCACCCAAAATAACTGCCTCTCGCTCCTCAACCCCTCCCCTCC  
ATCCCTGGCCCCCTCCCTGGATGACATTAAAGAAGGGTTGAGCTGGTCCCTGCCTGCATGTGACTGTAAA  
TCCCTCCCATGTTTTCTCTGAGTCTCCCTTTGCCTGCTGAGGCTGTATGTGGGCTCCAGGTAACAGTGCT  
GTCTTCGGGCCCCCTGAACTGTGTTTCATGGAGCATCTGGCTGGGTAGGCACATGCTGGGCTTGAATCCAG  
GGGGGACTGAATCCTCAGCTTACGGACCTGGGCCCCTGTGTTTCTGGAGGGCTCCAGTCTTCCTTGTCTT  
GTCTTGGAGTCCCCAAGAAGGAATCACAGGGGAGGAACCAGATACCAGCCATGACCCAGGCTCCACCAA  
GCATCTTCATGTCCCCCTGCTCATCCCCACTCCCCCCCACCCAGAGTTGCTCATCCTGCCAGGGCTGGC  
TGTGCCACCCCAAGGCTGCCCTCCTGGGGGGCCCCAGAACTGCCTGATCGTGCCGTGGCCCAGTTTTGTG  
GCATCTGCAGCAACACAAGAGAGAGGACAATGTCCTCCTCTTGACCCGCTGTCACCTAACCAGACTCGGG  
CCCTGCACCTCTCAGGCACTTCTGGAAAATGACTGAGGCAGATTCTCCTGAAGCCCATTCTCCATGGGG  
CAACAAGGACACCTATTCTGTCCTTGTCTTCCATCGCTGCCCCAGAAAGCCTCACATATCTCCGTTTAG  
AATCAGGTCCCTTCTCCCCAGATGAAGAGGAGGGTCTCTGCTTTGTTTTCTCTATCTCCTCCTCAGACTT  
GACCAGGCCAGCAGGCCCCAGAAGACCATTACCCTATATCCCTTCTCCTCCCTAGTCACATGGCCATAG  
GCCTGCTGATGGCTCAGGAAGGCCATTGCAAGGACTCCTCAGCTATGGGAGAGGAAGCACATCACCCATT  
GACCCCGCAACCCCTCCCTTTCTCCTCTGAGTCCCGACTGGGGCCACATGCAGCCTGACTTCTTTGTG  
CCTGTTGCTGTCCCTGCAGTCTTCAGAGGGGCCACCGCAGCTCCAGTGCCACGGCAGGAGGCTGTTCTGA  
ATAGCCCCTGTGGTAAGGGCCAGGAGAGTCCTTCCATCCTCCAAGGCCCTGCTAAAGGACACAGCAGCCA  
GGAAGTCCCCTGGGCCCCCTAGCTGAAGGACAGCCTGCTCCCTCCGTCTCTACCAGGAATGGCCTTGTCTT

ATGGAAGGCACTGCCCCATCCCAAATAATCTAGGAATCACTGTCTAACCCTCACTGTCATGAATGTGT  
ACTTAAAGGATGAGGTTGAGTCATACCAAATAGTGATTTGATAGTTCAAATGGTGAAATTAGCAATTC  
TACATGATTCAGTCTAATCAATGGATACCGACTGTTTCCACACAAGTCTCCTGTTCTCTTAAGCTTACT  
CACTGACAGCCTTTCACTCTCCACAAATACATTAAAGATATGGCCATCACCAAGCCCCCTAGGATGACAC  
CAGACCTGAGAGTCTGAAGACCTGGATCCAAGTTCTGACTTTTCCCCCTGACAGCTGTGTGACCTTCGTG  
AAGTCGCCAAACCTCTCTGAGCCCCAGTCATTGCTAGTAAGACCTGCCTTTGAGTTGGTATGATGTTCAA  
GTTAGATAACAAAATGTTTATACCCATTAGAACAGAGAATAAATAGAACTACATTTCTTGCA

>NM\_031459.5 Homo sapiens sestrin 2 (SESN2), mRNA

GCTGGCAGTTCCGCGCGGGGATGCTGAGGAGCGCTGGGTCCGGGAGCAGCCCTGGCCCCTGCGGACTTC  
CGAGGCCGTGAAAACCCCTGCGCTGCGGCCCTTCCCAGGCCCCCGAGGCCGTTCCCGTTCCCGAAGCCC  
GACTGGGGGAAGAGTCCAGCACCAAAGCGGCCGTTCTCGGATTCCGGAGCGTTCTGGAGCCCCGAGAGAC  
GCCCCGGGGTTCTAGAAGCTCCCCGGCGGCGCCAGTCCCGGCTTCATTGGGCGTCCCTCCGAAACCCA  
CTCGGGTGACGGGTGCTCGGCGAGCCGCGACCGGGTCTGGCGCGCACCATGATCGTGGCGGACTCCGA  
GTGCCGCGCAGAGCTCAAGGACTACCTGCGGTTGCCCCGGGCGGCGTGGCGACTCGGGCCCCGGAGAG  
GAGCAGAGGGAGAGCCGGGCTCGGCGAGGCCCTGAGGGCCCAGCGCCTTCATCCCCGTGGAGGAGGTCC  
TTCGGGAGGGGGCTGAGAGCCTCGAGCAGCACCTGGGGCTGGAGGCACTGATGTCCTCTGGGCGAGTAGA  
CAACCTGGCAGTGGTGATGGGCCTGCACCCTGACTACTTTACCAGCTTCTGGCGCCTGCACTACCTGCTG  
CTGCACACGGATGGTCCCTTGGCCAGCTCCTGGCGCCACTACATTGCCATCATGGCTGCCGCCCGCCATC  
AGTGTTCCTTACCTGGTAGGCTCCACATGGCCGAGTTTCTGCAGACTGGTGGTGACCCTGAGTGGCTGCT  
GGGCCTCCACCGGGCCCCCGAGAAGCTGCGCAAACCTCAGCGAGATCAACAAGTTGCTGGCGCATCGGCCA  
TGGCTCATACCAAGGAACACATCCAGGCCTTGCTGAAGACCGGCGAGCACACTTGGTCCCTGGCCGAGC  
TCATTCAGGCTCTGGTCCTGCTACCCACTGCCACTCGCTCTCCTCCTTCGTGTTGGCTGTGGCATCCT

CCCTGAGGGGGATGCAGATGGCAGCCCTGCCCCCAGGCACCTACACCCCTAGTGAACAGAGCAGCCCC  
CCAAGCAGGGACCCGTTGAACAACCTCTGGGGGCTTTGAGTCTGCCCCGCGACGTGGAGGCGCTGATGGAGC  
GCATGCAGCAGCTGCAGGAGAGCCTGCTGCGGGATGAGGGGACGTCCCAGGAGGAGATGGAGAGCCGCTT  
TGAGCTGGAGAAGTCAGAGAGCCTGCTGGTGACCCCTCAGCTGACATCCTGGAGCCCTCTCCACACCCA  
GACATGCTGTGCTTTGTGGAAGACCCTACTTTCGGATATGAGGACTTCACTCGGAGAGGGGCTCAGGCAC  
CCCCTACCTTCCGGGCCCAGGATTATACCTGGGAAGACCATGGCTACTCGCTGATCCAGCGGCTTTACCC  
TGAGGGTGGGCAGCTGCTGGATGAGAAGTTCCAGGCAGCCTATAGCCTCACCTACAATACCATCGCCATG  
CACAGTGGTGTGGACACCTCCGTGCTCCGCAGGGCCATCTGGAACCTATATCCACTGCGTCTTTGGCATCA  
GATATGATGACTATGATTATGGGGAGGTGAACCAGCTCCTGGAGCGGAACCTCAAGGTCTATATCAAGAC  
AGTGGCCTGCTACCCAGAGAAGACCACCCGAAGAATGTACAACCTCTTCTGGAGGCACTTCCGCCACTCA  
GAGAAGGTCCACGTGAACTTGCTGCTCCTGGAGGCGCGCATGCAAGCCGCTCTGCTGTACGCCCTCCGTG  
CCATCACCCGCTACATGACCTGACTCCTGAGCAGGACCTGGGCCCCGTTTCAGCTCCCCACAAGGACTTCT  
CTGTCTGGAGACAGCCCCAGACCCTTTTGTGTCCCATGCCACCCCTCCCCACGCTGCAGTGGGCTTGTGT  
GTGATGTGCAGTCCCGAAGCCACACCCTCCCTTTTCTCACTGGAATGGACAGTTCATTGCACTGACTCT  
GGGATCTCAGCCCTGCTCCTGGGAGCTGGAAGAGCACTTGGAGATCCTAAGGGACCACACCCTTCCTCCT  
TCCCCTGCCACAGAGGCAGAGGGCACAGGAAAGAAGCCGGGCCAAGCTCGGAATTAATGTGCCACAAGT  
GTTGTGGCCTTCCTGAACTGGGAAGTCCCTGGCTGGCCCCGGGGGAGAGGGGCAAATGCCTCCGGGACT  
GACACTCCAGGCAGCTTTGCCTTCTCTCCCCTGTCATTTCCAGATTTTCATTACCTCCTACTTGCCATTCA  
CCCATCAATGTGAAAGTCAGGGTCACAGCTGGTCTGTGTGTCCAGTTCCTAAAAGCCTGTTCTGTTGGG  
CAGCCTGAGGCTGTTGCCGAATCCTAGTTCAGTTTTTTGACTTCCTTGCCCTTTTTCCCTTTTCTCCA  
TGCTTAATGGTGTGAGGCGTCAGGAGAGAGGCCAAGTACATAAAAAAAAAAAAAAGCAGATTATCTCTAGA  
GAGTTTGAGCCTTTGCTGGTCACATTGCCTTCTGAAGAGGAGGGAGTATTAGATTATAAATCCTCTTTAT  
TTTGGTCCTTTATGCTTGAGGTTCCAACCTGGAGCCACAGTGTGTGAGAGGAGGAGGAGAGGGAGAATTC  
TGTTCTCCAGAGCTGCACCTGCCTCGCAGAGGCCAGCACCCCACTCTCCTGCCTCCAGTGGCCCTGCCG  
CAGATGTCTCCAAAAAGTTGAGCCTTTCTAGATGGCTTAGGTGGCACCATGGCTCAGCAGGAGGGGCGG

GAGGCACCAGGGTTCTTGTTTGGACCCTGCCCCTGGGCCATGGCCAGGTGACCATGGCTACATTGCCAAA  
CCTCTGACTGCCACAGCTGCAGACTGAGAGGGTGGGTCTGAGTCCCCACAATGTCTGAAGCTGCCCCTGG  
GATTCTCAGGCCAACCTGCCAACAGCAAGCGGATTTTCTTGCAAGATCAGGGACCCCATTTCTGCAGCCA  
GTGTCTCCTGGGTGCCTTCTGAGGACTCCCACCCCATCCCAGTATCTCATCTGTCCCCTCTCCTGGGGC  
TTAAGTGGGTTGCTTCCAGGCAGAAGCAGCCAAGGACCGATTCCAGGCACTTTCTGTAGCAAATGACTGT  
GAATTACGACTTCTCTTGCCCTTCTTCTAGCAGTCTGTGCCTCCTCTCTGACCAGTTTGGAGGGCACTGA  
AGAAAGGCAAGGGCCGTGCTGCTGCTGGGCGGGCAGGAGAGGAGCCTGGCCAGTGTGCCACATTAAATA  
CCCGTGCAGGCGCGGAGAAGCAACCGGCACCCCTTCCGGCCTGAAAGCCCTCCCTGCAAGAAGGTGTGC  
AGGAGAGAAGAGGCCCGGCATGGGGATCTGGGTTCTAGAGGGCATGTGATGACTGTAAATGTTCACTGG  
GTGGGTAGGGAGTGGTATCCAGTGTTCAGTGCAGAAATCTTTGGCTTTGCTACCAGTTCATATGATGA  
GAAATAAACGTTGCTGAGGTTTTGTTTCATA

>NM\_016009.5 Homo sapiens SH3 domain containing GRB2 like, endophilin B1 (SH3GLB1), transcript  
variant 1, mRNA

GTTTTCCCTTGGGACCCGGGTCCACACGGCGGGGTGCCCCGTCCATCTCCGGCTCGCCCGCGGGGCCCA  
TCGTCGACGTTAGCGGCCGTTCTCCGAGCCGACTGACCCATCCTTGCGCTGCCGCCGCGCGCTTGTCT  
CCTCCCTCGCCCCGCTTCATCTCCCCGTTACGGAAACGACAGCTGCGGCTGCGGGGCTGGCGCCGCC  
TCCCTCCACCTACCACGTCTGCCCTGCGCGCTCTAGCCCTGCGCCCCAGCCCGGCCGCGGCACCTCCGCC  
TCGCCGCCGCTAGGTGCGCCGGCTCCGCCCGGCTGCCGCCTAGGATGAATATCATGGACTTCAACGTGAA  
GAAGCTGGCGGCCGACGCAGGCACCTTCCTCAGTCGCGCCGTGCAGTTCACAGAAGAAAAGCTTGGCCAG  
GCTGAGAAGACAGAATTGGATGCTCACTTAGAGAACCTCCTTAGCAAAGCTGAATGTACCAAAATATGGA  
CAGAAAAAATAATGAAACAACTGAAGTGTTATTGCAGCCAAATCCAAATGCCAGGATAGAAGAATTTGT  
TTATGAGAACTGGATAGAAAAGCTCCAAGTCGTATAAACAACCCAGAACTTTTGGGACAATATATGATT  
GATGCAGGGACTGAGTTTGGCCCAGGAACAGCTTATGGTAATGCCCTTATTAAATGTGGAGAAACCCAAA

AAAGAATTGGAACAGCAGACAGAGAACTGATTCAAACGTCAGCCTTAAATTTTCTTACTCCTTTAAGAAA  
CTTTATAGAAGGAGATTACAAAACAATTGCTAAAGAAAGGAAACTATTGCAAAATAAGAGACTGGATTG  
GATGCTGCAAAAACGAGACTAAAAAAGGCAAAAGCTGCAGAACTAGAAATTCATCTGAACAGGAATTAA  
GAATAACTCAAAGTGAATTTGATCGTCAAGCAGAGATTACCAGACTTCTGCTAGAGGGAATCAGCAGTAC  
ACATGCCCATCACCTTCGCTGTCTGAATGACTTTGTAGAAGCCCAGATGACTTACTATGCACAGTGTTAC  
CAGTATATGTTGGACCTCCAGAAACAAGTGGGAAGTTTTCCATCCAATTATCTTAGTAACAACAATCAGA  
CTTCTGTGACACCTGTACCATCAGTTTTACCAAATGCGATTGGTTCTTCTGCCATGGCTTCAACAAGTGG  
CCTAGTAATCACCTCTCCTTCCAACCTCAGTGACCTTAAGGAGTGTAGTGGCAGCAGAAAGGCCAGGGTT  
CTCTATGATTATGATGCAGCAAACAGTACTGAATTATCACTTCTGGCAGATGAGGTGATCACTGTGTTCA  
GTGTTGTTGGAATGGATTGAGTGGCTAATGGGGGAAAGGGGAAACCAGAAGGGCAAGGTGCCAATTAC  
CTACTTAGAACTGCTCAATTAAGTAGGTGGACTATGGAAAGGTTGCCATCATGACTTTGTATTTATATA  
CAATTAAGTCTAAATAAAGCAGGTAAAGTATCTTCCATGTAAATGTGTTAAGAGACTGAAAATACCAGCC  
ATCAGAACTGGCCTTTCTGCCAATAAAGTTGCATGGTAAATATTTTATTACAGAATTTATGTTAGAGCT  
TTCATGCCAAGAATGTTTTCTTACAAAATTCTCTTTTTATTGAGGTTTCACTAATAAGCAGCTTCTACTT  
TTGAGCCTCAACTTAAAGCAGAACTGTTTTCTACTGGATTTTTCATTAACAGCAAGCTTTTTCTTTTATG  
TAAAATAAATCTATTGTGAATTGATATCAGCGACTCATTTATTAGGTATAAATAATAGCCAAAGAATAAA  
ATTAAAATTTATTTTAACTTTCTGGTCTTAAAAAGAGCTGTAGGATATAAACCTCTTTGTGAAAAGTAG  
AATTTTCTGAATGCTTTCATAGACAAAAACGCATTTAACTATGTTTACCTGGTTTTCCAACAGAAATCA  
AATGATTTTAATATTATGTTTTGATGGGTTATTTTCAGAGTTGTTTGGTTTTTTAAACACTACTGAATGG  
TTTCTTTTAAATTTAAGAACAAGTCTTCTGAAAAGCAATACCGTATTTCTCTGATAAATTTGTAGTTA  
AGGTTCTAGAAAATCTAGGACAAATTTACTTCATTAACATAAAGTTTTTAAGATTATTCAGTTGGCACA  
ATTTAATGCATAATTGGGATTGGATCCATTTACTGTACTGTGGTACAGTAAAGAGAATGTGTTCTTATTG  
AACAGCAGATTTGTATACAAATACGGAATAATGCAACTACATTATAAATTGTATACGAACAAAATAAATT  
GGGTCACTCTGAGCTTACTATTAAAACATTGAAAATTTATTAATGAACACAGGCTATCTTGATGAGGATC  
TCTGCTTATGAAACACATACTAATGAAATTATTAGTGACACATTGGAAGCTAGAAAATTGCTGTTGGGGC

CATTGCTATAAATCATTGTTTCCATGTTAAGACTTCTGTTCTAATTCATTCAACAAACATTTGTTG  
AGGGCCAGATACTGTGCTGGTCAACTGGGGATACTGTCCTGAACAATATGCACACAGTTCTTGCCCCTGC  
AGAGCTTAAAGACCATTAAAGGATACAGAAAAATTAAGCAATTATCCTATAGTAGGATTCGTGGTGTGATG  
GGGAAAATACAAGGTACTGTATTTGGGAGTCATGTAAGTCCAGTTTTGGGAGTGAGAGAGGGTCTGGGGA  
AGAACTGTTCCAGATAAAAAGATGTGTAACCAAGATAGCATAGCACATTCTGACAACTAAAGCAATTTAC  
TCTAACTTAAGCATGAAGTACAAAAGTATAGTTCATTTATTGAGGGAATGTTAAGCTATTAAGATGATAC  
TTTTTGGTACTTTTAAAAAATGAATACTTAAACACCGTTTTAAATTTTGTGTTAAGAGCTCCTAATAA  
GAACTTGGTAAACATGTTGACAATTTAACTCACAGTCTAACTTTAAAAGTAGTAGTTACCTTTTATTT  
CTGTGCCATGAGACAAATTCTTCTGCAGTTTTATAGTTGTACAAGATGTTTTGACTCACTCTCAATTGCC  
ATATTCTTAAAGAAACCCTGAAAAGCTGCTCAAGCTGGTCAGTTTTCTGTAAAACCAAGTAAATGAAATT  
TTCTCTCCCCTCAGAAAGGAAGTTCTACAGCCTAGAGTACCATCTATTGTGTTTTATAAGTCCAGATTTA  
GGCTTTGAAAGATCATACAAAACCTTCAGATCGACTTAAACAGCAACTATGAATTAGGTTTATGGGAAAT  
GTAGTAATACAGGGGAAAGAATATCGGTAATGGAGTGAAATGGTCCTGGGTTCAAATCCAGTCTTCCTCA  
CATATTGTGCTCTTTAAGCTTCAAATGAGATGTATAACTGCCTTTTCCTTACCAGTAAATGAGGACAAT  
AATTATGACACCATAGGGTGGTTGTGAGGATTAGCAAATGTTATCTTGTATTTAGGTGCCTTTCAGGGA  
AAGGCTTGGCACATAGTAAACACATCCTGTAAATATCAGTTTCCCCTTGTTAGCCCCTGTAGCATCCTGA  
CCTACCAAGTCTATAGGCCTTGCATATCACTGTGCACCAGAGATACCTCTTTTACATCTGGGCTCTGTTT  
TCTCTCTATCAATCCTATCCTCCACCCTCTTTAAATCAGACCCCAGGTTTAACTTCCCACAGTCAGTAT  
AAATCATTTTTTCAGAACTTTCAGCTTTCATCAAGTGAAAGTTGATTTTAGTTACCCAGTAATGTACAGA  
AACCTTCAATAATGTTAAGCTTCAAAGGCTTCTGGTACGTTTGTCTACCACAGAACCACCACAATATATA  
TGCTTGTTCTTAGGTTTATTGCTTTTATTTAATGGGGTTTGGTTGTTTGGGTTTTATTTGGTTTTGG  
CTTATTTTAAAGTCAAGTTTAGTTTTTACTCAGGTAAAGGCCTGAAGTTTCTGGGCGTGGAAGAAAAAG  
CTTGGGAAGCCTATTAATTCATGGTGCAGTTCAGAATTGTTTAAATAAGCTCTGTGCCACTGAGCTTAAT  
CTGAAAGTATAGTGACATGTGAAGGATGCACATATGAATGAAAACTAAAATAATTGTAGGCTCTTCTAT  
AAATGAAAAAAAAGTGATTGGATTGTGTCTACCTTTTTCTCAAAGTAATCTAACCTAAACGGTCATGG

TGTTAAACTTTTTATGGTGCTAATCAGAAAAATTGATGTTGCAAGAAATGAGGTCTCAAAAATGGGAAT  
GTGCCTCCTCACTCTGCGTCACATGGGAAATAAATCCTGAGGCCAGGATCACCAGTGGGGTAGAGTCATC  
TTCATAGTCTCCTGTTATCCTCCCCCTGAACAAAGAACAAAGTGAGACTGGGAAGCTAGTGTTGGGGAAA  
CATTTCTGGGATAAACTGTGGAGTGGAGAAGACAATGGAGGGCAAGGCAAAAACCCACAGACTTGTTTAC  
CCATAGAGGCCCACTCACCTCCATGCTGACAGAATTCCAGAAAAATTCCTTCCCTATCTCCCAAACACC  
TGAAATTCTGAAATATTGCCCTACTATTTAGCACTTTAAGCTTCAGTGAGGTGCTGTAATGGAGAGATAG  
CTTCATAGTTTAGCCTATAGCCAACTTTGCCTCAAGACCTCCAGATAAGATGAAGTGGCTTTTACCTCAT  
GTGAGTCTCAAACGCTGGAGAGAGAGTTCCACAACCACCCCTGCCCTTCTCCCATATTACGCTCATTAG  
AAAGTCTACTCAGGGCTGGGTGCCGTGGCTCATGCCTGTAATCCAGCACTTTGGAGGCTGAGGCGGGTG  
GATCATCTGAGGTCAGGAGTTCGAGACCAGCCTGGCCAACATGGGGAAACCCTGTCTCTACTGAAAAATAT  
AAAAATTAGCCGGGCATGGTGGCGTGACCTGTAATTCAGCTACTCGGGAGGCTGAGGCAGGAGAATCA  
CTTGAACCCAGAGGCAGAGGCTACAGTGAGCCAAGATTGCACCACTGCACTCCAACCTGGGTGATAGAA  
TAAGACTCTTGCTCAAGGAAAGAAAAAATGTCTACTCAGTAGAGCAGTGATTGGCAAAGTGTGAGACCC  
CAGACCGGCAATATTGGCATCTCCTGGAGACTTGTTTAAAATGCTGATTACTATTTTCAAGAACTTTCTA  
CCTTCATTTTTACTTATTTTTTGTTTTCAAGGGCTCATGGAATCAGTCTTCCATGTGACAGCTTTTTTAA  
TATTTAAGACAAAACTGAGTCTTCTAATCTTAATTGTGTTCTAGCAGTAGTCATTGTAATTATAGTTA  
TTTTTATAATTTATTTGTTTAGTGTATATCTGTCACTCTAGAATGTAGGCTCCCTGAGATAAAAACTATA  
ATTCTTTTGATGGCAGTTACATTCCCAACTCTTAGCACAAGATCTAGGACATAGTATGAACTCAATAAAT  
TTTTGTTGAATGAAAGAAAAATGCAAATTTATAAGCCTTTTCAGAGACCTACTGAATCAAACCTCTGAGAG  
TGGAGCCCAGCAATCTGTTGTAAAAGCTGTTTGAGTAATACTGTTGCACTCTAAGCTTGAGAACCACTGC  
AATAGAACTAAGAGAACATTCAATTCACCTTCAGGCCTATTCTCTGACATCACTTGAAAAATCCTCTCTG  
CCTTCTGTAACCCTTAACCAACAACAGTGCCCTGTCCATGTAGGGGAAACTTCTGGGCTGTATTACAAGT  
GGGTAGGAAGGTATAAGGATATCATAGTGGGAAGTATTGCTTAGAATGCCAGTACTTGTTTGCTGTGGAA  
GGTTTCTAGGAATGGATTGCTTAGTCTAAAGTAAGCACTACCACCATCCACGTTTTCACTCAACACAGTG  
CCTTTAATTGGTGACTAACATCAAAACACCTTGACAAACCGTTAAAACAGTATCAGAAACCATGTGTAC

ATCCCTGTGCCTCTTAGATTGCTAAGTTCTGCTCTCATTCTTACTTCAAAGGACACTTTTTAAAGAATTG  
TTAATGCTTTTTTATAATACAAGTCATAGCCCTGTTGGCAAAAAGAAAAAGATTCAGTGAGAAAGAAAA  
ATCACTGATAATTCCATCATCCAGGGAGAACCACTGTTATTTAAGTATATGGCCTTCAGACTTTTCTGT  
GCATTTATAGATATTTTTAATGGGATCAAAGTGACATACTGTTTTGTAACTTTTTTTCACTCAACAATA  
CCATGACTGTCTTGCTGTGTCAAGTATATTTCTACATCTCTTAATGGCTGCATGATATTCCATCATATGT  
GCCACATTTTATTAACTACTGTTCAATTTTTAGGTTTCCAACCTTCATTAATAAAGTGCTTTAAAGAAC  
A

>NM\_012238.5 Homo sapiens sirtuin 1 (SIRT1), transcript variant 1, mRNA

GCCAGTGCCGCGCGTCGAGCGGGAGCAGAGGAGGCGAGGGAGGAGGGCCAGAGAGGCAGTTGGAAGATGG  
CGGACGAGGCGGCCCTCGCCCTCAGCCCGGCGGCTCCCCCTCGGCGGCGGGGGCCGACAGGGAGGCCGC  
GTCGTCCCCCGCCGGGGAGCCGCTCCGCAAGAGGCCGCGGAGAGATGGTCCCGGCCTCGAGCGGAGCCCG  
GGCGAGCCCGGTGGGGCGGCCCCAGAGCGTGAGGTGCCGGCGGCGGCCAGGGGCTGCCCGGGTGCGGCGG  
CGGCGGCGCTGTGGCGGGAGGCGGAGGCAGAGGCGGCGGCGGCAGGCGGGGAGCAAGAGGCCAGGCGAC  
TGCGGCGGCTGGGGAAGGAGACAATGGGCCGGGCCTGCAGGGCCATCTCGGGAGCCACCGCTGGCCGAC  
AACTTGTACGACGAAGACGACGACGACGAGGGCGAGGAGGAGGAAGAGGCGGCGGCGGCGGCGATTGGGT  
ACCGAGATAACCTTCTGTTCTGGTGATGAAATTATCACTAATGGTTTTTCATTCTGTGAAAGTGATGAGGA  
GGATAGAGCCTCACATGCAAGCTCTAGTGACTGGACTCCAAGGCCACGGATAGGTCCATATACTTTTGT  
CAGCAACATCTTATGATTGGCACAGATCCTCGAACAATTCTTAAAGATTTATTGCCGGAACAATACCTC  
CACCTGAGTTGGATGATATGACACTGTGGCAGATTGTTATTAATATCCTTTCAGAACCACCAAAAAGGAA  
AAAAAGAAAAGATATTAATACAATTGAAGATGCTGTGAAATTACTGCAAGAGTGCAAAAAAATTATAGTT  
CTAACTGGAGCTGGGGTGCTGTTTCATGTGGAATACCTGACTTCAGGTCAAGGGATGGTATTTATGCTC  
GCCTTGCTGTAGACTTCCCAGATCTTCAGATCCTCAAGCGATGTTTGATATTGAATATTTAGAAAAGA

TCCAAGACCATTCTTCAAGTTTGCAAAGGAAATATATCCTGGACAATTCCAGCCATCTCTCTGTCACAAA  
TTCATAGCCTTGTCAGATAAGGAAGGAAAACACTCTCGCAACTATACCCAGAACATAGACACGCTGGAAC  
AGGTTGCGGGAATCCAAAGGATAATTCAGTGTCATGGTTCCTTTGCAACAGCATCTTGCCTGATTGTAA  
ATACAAAGTTGACTGTGAAGCTGTACGAGGAGATATTTTAATCAGGTAGTTCCTCGATGTCCTAGGTGC  
CCAGCTGATGAACCGCTTGCTATCATGAAACCAGAGATTGTGTTTTTTGGTGAAAATTTACCAGAACAGT  
TTCATAGAGCCATGAAGTATGACAAAGATGAAGTTGACCTCCTCATTGTTATTGGGTCTTCCCTCAAAGT  
AAGACCAGTAGCACTAATTCCAAGTTCATACCCCATGAAGTGCCTCAGATATTAATTAATAGAGAACCT  
TTGCCTCATCTGCATTTTGATGTAGAGCTTCTTGGAGACTGTGATGTCATAATTAATGAATTGTGTCATA  
GGTTAGGTGGTGAATATGCCAACTTTGCTGTAACCCTGTAAAGCTTTCAGAAATTACTGAAAAACCTCC  
ACGAACACAAAAAGAATTGGCTTATTTGTCAGAGTTGCCACCCACACCTCTTCATGTTTCAGAAGACTCA  
AGTTCACCAGAAAGAAGCTTCACCACCAGATTCTTCAGTGATTGTCACACTTTTAGACCAAGCAGCTAAGA  
GTAATGATGATTTAGATGTGTCTGAATCAAAGGTTGTATGGAAGAAAAACACAGGAAGTACAACTTC  
TAGGAATGTTGAAAGTATTGCTGAACAGATGGAAAATCCGGATTGGAAGAATGTTGGTTCTAGTACTGGG  
GAGAAAAATGAAAGAACTTCAGTGGCTGGAACAGTGAGAAAATGCTGGCCTAATAGAGTGGCAAAGGAGC  
AGATTAGTAGGCGGCTTGATGGTAATCAGTATCTGTTTTTGCCACCAAATCGTTACATTTTCCATGGCGC  
TGAGGTATATTCAGACTCTGAAGATGACGTCTTATCCTCTAGTTCTTGTGGCAGTAACAGTGATAGTGGG  
ACATGCCAGAGTCCAAGTTTAGAAGAACCCATGGAGGATGAAAGTGAAATTGAAGAATTCTACAATGGCT  
TAGAAGATGAGCCTGATGTTCCAGAGAGAGCTGGAGGAGCTGGATTTGGGACTGATGGAGATGATCAAGA  
GGCAATTAATGAAGCTATATCTGTGAAACAGGAAGTAACAGACATGAACTATCCATCAAACAAATCATAG  
TGTAATAATTGTGCAGGTACAGGAATTGTTCCACCAGCATTAGGAACCTTAGCATGTCAAAATGAATGTT  
TACTTGTGAACTCGATAGAGCAAGGAAACCAGAAAGGTGTAATATTTATAGGTTGGTAAAAATAGATTGTT  
TTTCATGGATAATTTTAACTTCATTATTTCTGTACTTGTACAACTCAACACTAACTTTTTTTTTTTTA  
AAAAAAAAAAGGTACTAAGTATCTTCAATCAGCTGTTGGTCAAGACTAACTTTCTTTTAAAGGTTCAATT  
GTATGATAAATTCATATGTGTATATATAATTTTTTTTGTGTTGTCTAGTGAGTTTCAACATTTTAAAGT  
TTTCAAAAAGCCATCGGAATGTTAAATTAATGTAAAGGGAACAGCTAATCTAGACCAAAGAATGGTATTT

TCAC TTTTCTTTGTAACATTGAATGGTTTGAAGTACTCAAAATCTGTTACGCTAAACTTTTGATTCTTTA  
ACACAATTATTTTAAACACTGGCATTTCCTCAAACTGTGGCAGCTAACTTTTAAATCTCAAATGACA  
TGCAGTGTGAGTAGAAGGAAGTCAACAATATGTGGGGAGAGCACTCGGTTGTCTTTACTTTTAAAGTAA  
TACTTGGTGCTAAGAATTCAGGATTATTGTATTTACGTTCAAATGAAGATGGCTTTTGACTTCCTGTG  
GACATGTAGCAATGTCTATATTGGCTCATAAACTAACCTGAAAAACAAATAAATGCTTTGGAAATGTTT  
CAGTTGCTTTAGAAACATTAGTGCCTGCCTGGATCCCCTTAGTTTTGAAATATTTGCCATTGTTGTTTAA  
ATACCTATCACTGTGGTAGAGCTTGCATTGATCTTTCCACAAGTATTAACTGCCAAAATGTGAATATG  
CAAAGCCTTTCTGAATCTATAATAATGGTACTTCTACTGGGGAGAGTGTAAATTTTTGGACTGCTGTTTT  
CCATTAATGAGGAGAGCAACAGGCCCTGATTATACAGTTCCAAAGTAATAAGATGTTAATTGTAATTCA  
GCCAGAAAGTACATGTCTCCATTGGGAGGATTTGGTGTTAAATACCAAAGTCTAGCCCTAGTATTATG  
GAGATGAACATGATGATGTAACCTTGTAAATAGCAGAATAGTTAATGAATGAACTAGTTCTTATAATTTAT  
CTTTATTTAAAGCTTAGCCTGCCTTAAACTAGAGATCAACTTTCTCAGCTGCAAAAGCTTCTAGTCTT  
TCAAGAAGTTCATACTTTATGAAATTGCACAGTAAGCATTTATTTTCAGACCATTTTGAACATCACTC  
CTAAATTAATAAAGTATTCCTCTGTTGCTTTAGTATTTATTACAATAAAAAGGGTTTGAAATATAGCTGT  
TCTTTATGCATAAAACACCCAGCTAGGACCATTACTGCCAGAGAAAAAATCGTATTGAATGGCCATTTT  
CCTACTTATAAGATGTCTCAATCTGAATTTATTTGGCTACACTAAAGAATGCAGTATATTTAGTTTTCCA  
TTTGCATGATGTTTGTGTGCTATAGATGATATTTTAAATTGAAAAGTTTGTTTTAAATTATTTTACAGT  
GAAGACTGTTTTAGCTCTTTTTATATTGTACATAGTCTTTTATGTAATTTACTGGCATATGTTTTGTAG  
ACTGTTTAATGACTGGATATCTTCCTTCAACTTTTGAAATACAAAACCAAGTGTTTTTTACTTGTACACTG  
TTTTAAAGTCTATTAAAATTGTCATTTGACTTTTTTCTGTAACTTA

>NM\_001193286.2 Homo sapiens sirtuin 2 (SIRT2), transcript variant 3, mRNA

AGTCGGTGACAGGACAGAGCAGTCGGTGACGGGACACAGTGGTTGGTGACGGGACAGAGCGGTCGGTGAC

AGCCTCAAGGGCTTCAGCACCGCGCCCATGGCAGAGCCAGACCGACTCAGATTCAGACTCTGAGGGAGGA  
GCCGCTGGTGGAGAAGCAGACATGGACTTCCTGCGGAACTTATTCTCCAGACGCTCAGCCTGGGCAGCC  
AGAAGGAGCGTCTGCTGGACGAGCTGACCTTGAAGGGGTGGCCCGGTACATGCAGAGCGAACGCTGTCTG  
CAGAGTCATCTGTTTGGTGGGAGCTGGAATCTCCACATCCGCAGGCATCCCCGACTTTCGCTCTCCATCC  
ACCGGCCTCTATGACAACCTAGAGAAGTACCATCTTCCCTACCCAGAGGCCATCTTTGAGATCAGCTATT  
TCAAGAAACATCCGGAACCCTTCTTCGCCCTCGCCAAGGAACTCTATCCTGGGCAGTTCAAGCCAACCAT  
CTGTCACTACTTCATGCGCCTGCTGAAGGACAAGGGGCTACTCCTGCGCTGCTACACGCAGAACATAGAT  
ACCCTGGAGCGAATAGCCGGGCTGGAACAGGAGGACTTGGTGGAGGCGCACGGCACCTTCTACACATCAC  
ACTGCGTCAGCGCCAGCTGCCGGCACGAATACCCGCTAAGCTGGATGAAAGAGAAGATCTTCTCTGAGGT  
GACGCCCAAGTGTGAAGACTGTCAGAGCCTGGTGAAGCCTGATATCGTCTTTTTTGGTGAGAGCCTCCCA  
GCGCGTTTCTTCTCCTGTATGCAGTCAGACTTCCTGAAGGTGGACCTCCTCCTGGTCATGGGTACCTCCT  
TGCAGGGACGTGGCCTGGCTGGGTGAATGCGACCAGGGCTGCCTGGCCCTTGCTGAGCTCCTTGGATGGA  
AGAAGGAGCTGGAGGACCTTGTCGGGAGGGAGCACGCCAGCATAGATGCCAGTCGGGGGCGGGGGTCCC  
CAACCCAGCACTTCAGCTTCCCCAAGAAGTCCCCGCCACCTGCCAAGGACGAGGCCAGGACAACAGAG  
AGGGAGAAACCCAGTGACAGCTGCATCTCCAGGCGGGATGCCGAGCTCCTCAGGGACAGCTGAGCCCC  
AACCGGGCCTGGCCCCCTCTTAACCAGCAGTTCTTGTCTGGGGAGCTCAGAACATCCCCAATCTCTTAC  
AGCTCCCTCCCCAAAACCTGGGGTCCCAGCAACCCTGGCCCCCAACCCAGCAAATCTCTAACACCTCCTA  
GAGGCCAAGGCTTAAACAGGCATCTCTACCAGCCCCACTGTCTCTAACCACTCCTGGGCTAAGGAGTAAC  
CTCCCTCATCTCTAACTGCCCCACGGGGCCAGGGCTACCCAGAACTTTTAACTCTTCCAGGACAGGGA  
GCTTCGGGCCCCCACTCTGTCTCCTGCCCCGGGGGCCTGTGGCTAAGTAAACCATAACCTAACCTACCCC  
AGTGTGGGTGTGGGCCTCTGAATATAACCCACACCCAGCGTAGGGGGAGTCTGAGCCGGGAGGGCTCCCG  
AGTCTCTGCCTTCAGCTCCCAAAGTGGGTGGTGGGCCCCCTTCACGTGGGACCCACTTCCCATGCTGGAT  
GGGCAGAAGACATTGCTTATTGGAGACAAATTA AAAACA AAAACA AACTAACAA

>NM\_182965.3 Homo sapiens sphingosine kinase 1 (SPHK1), transcript variant 2, mRNA

AGTGCCCTCCCCGCTCCGCGGCGCCGGCTGCGAAGTTGAGCGAAAAGTTTGAGGCCGGAGGGAGCGAGGC  
CGGGGAGTCCGCTCCAGCGGGGCGCTCCAGTCCCTCAGACGTGGGCTGAGCTTGGGACGAGCTGCGTTCC  
GCCCCAGGCCACTGTAGGGAACGGCGGTGGCGCCTCCCCAGCAAACCGGACCGACTGGGTAGGGCCGCC  
ACCCTGCCTTCGCGCCGCTCGTGGCTCCTGTGCGGCCCGCCCTCGCGGGGCCCCGGGAAGTGGGCCACTT  
GTCGCTTGGGCGAGAGCAGGCGGCAGCTGGTGGCCCGTTGCGGCTTGGCTTTGGCGGACCCGGGAGCG  
GCTCCACGAGCGCCGCGCGCTCGCAACGGAGCGGGGCCCTGAGAAGCGCGCGCCGCGGCTCCACCGC  
TCTGGAGCTCCGGGCAGGGGACACGGCAACCTGGATGGCTGGGGCAGGGATCCTCTCCAGAACTTCGTG  
CCCAGCAATGTCCGCTCAAGTTCTGGGATTTTTACGCAGCTGGACTCCCCTCCCCCTGGCAGCCCCGAGG  
GGTCCAGCCGCCGAGGGAATGACGCCGGTGCTCCTGCAGCCACGGCTCCGGGCGGGGAAGGCGAGCCCC  
ACAGCCGGCCCTGCGACGCCCGCCTGGGCAGCACCGATAAGGAGCTGAAGGCAGGAGCCGCCGCCACGGG  
CAGCGCCCCCACAGCGCCAGGGACCCCCTGGCAGCGGGAGCCGCGGGTCGAGGTTATGGATCCAGCGGGC  
GGCCCCCGGGGCGTGCTCCCGCGGCCCTGCCGCGTGCTGGTGTGCTGAACCCGCGCGGCGGCAAGGGCA  
AGGCCTTGCACTCTTCCGGAGTCACGTGCAGCCCCTTTTGGCTGAGGCTGAAATCTCCTTCACGCTGAT  
GCTCACTGAGCGGCGGAACCACGCGCGGGAGCTGGTGCGGTCGGAGGAGCTGGGCCGCTGGGACGCTCTG  
GTGGTCATGTCTGGAGACGGGCTGATGCACGAGGTGGTGAACGGGCTCATGGAGCGGCCTGACTGGGAGA  
CCGCCATCCAGAAGCCCCTGTGTAGCCTCCAGCAGGCTCTGGCAACGCGCTGGCAGCTTCCTTGAACCA  
TTATGCTGGCTATGAGCAGGTCACCAATGAAGACCTCCTGACCAACTGCACGCTATTGCTGTGCCGCCGG  
CTGCTGTACCCATGAACCTGCTGTCTCTGCACACGGCTTCGGGGCTGCGCCTCTTCTGTGCTCAGCC  
TGGCCTGGGGCTTCATTGCTGATGTGGACCTAGAGAGTGAGAAGTATCGGCGTCTGGGGGAGATGCGCTT  
CACTCTGGGCACCTTCCTGCGTCTGGCAGCCCTGCGCACCTACCGCGGCCGACTGGCCTACCTCCCTGTA  
GGAAGAGTGGGTCCAAGACACCTGCCTCCCCGTTGTGGTCCAGCAGGGCCCGGTAGATGCACACCTTG  
TGCCACTGGAGGAGCCAGTGCCCTCTCACTGGACAGTGGTGGCCGACGAGGACTTTGTGCTAGTCCTGGC

ACTGCTGCACTCGCACCTGGGCAGTGAGATGTTTGCTGCACCCATGGGCCGCTGTGCAGCTGGCGTCATG  
CATCTGTTCTACGTGCGGGCGGGAGTGTCTCGTGCCATGCTGCTGCGCCTCTTCCTGGCCATGGAGAAGG  
GCAGGCATATGGAGTATGAATGCCCCTACTTGGTATATGTGCCCCTGGTCGCCTTCCGCTTGAGGCCAA  
GGATGGGAAAGGTGTGTTTGCACTGGATGGGGAATTGATGGTTAGCGAGGCCGTGCAGGGCCAGGTGCAC  
CCAACTACTTCTGGATGGTCAGCGGTTGCGTGGAGCCCCGCCAGCTGGAAGCCCCAGCAGATGCCAC  
CGCCAGAAGAGCCCTTATGACCCCTGGGCCGCGCTGTGCCTTAGTGTCTACTTGCAGGACCCTTCCTCCT  
TCCCTAGGGCTGCAGGGCCTGTCCACAGCTCCTGTGGGGGTGGAGGAGACTCCTCTGGAGAAGGGTGAGA  
AGGTGGAGGCTATGCTTTGGGGGGACAGGCCAGAATGAAGTCCTGGGTCAGGAGCCCAGCTGGCTGGGCC  
CAGCTGCCTATGTAAGGCCTTCTAGTTTGTCTGAGACCCCCACCCACGAACCAAATCCAAATAAAGTG  
ACATTCCCA

>NM\_032038.3 Homo sapiens sphingolipid transporter 1 (putative) (SPNS1), transcript variant 1, mRNA

ACATGACCGGCTTTAAGCAACATGGCGGCTGCCGTGGTGCAGCGCCCGGGCTGAGCGACAGCAAGTGACG  
CGGGCTCTACCCCGGGTGAGGGGTGGCCTCCGCGTGGGATCGTGCCCTTTCAGCCCGCTCCTGTCCCC  
GACATCACGTGTATTCCGCACGTCCCCTCCGCGCTGTGTGTCTACTGAGACGGGGAGGCGTGACAGGGCC  
CGGGTCCCTTCTCAGTGGTGCTCTGTGCTTCAGGGCAAGCTCCCCGTCTCCGGGCGCACTTCCCTCGCCT  
GTGTTGCGTCCATCCTCCTTTCTCCAGCCTCCTCCCCTCGCAGGTGGGATCGTCGGTGGGACCGGAGCGC  
GGGCGGGCGCGGCCCCCGGGACCATGGCCGGGTCCGACACCGCGCCCTTCCTCAGCCAGGCGGATGACC  
CGGACGACGGGCCAGTGCCTGGCACCCCGGGTTGCCAGGGTCCACGGGGAACCCGAAGTCCGAGGAGCC  
CGAGGTCCCGGACCAGGAGGGGCTGCAGCGCATCACCGGCCTGTCTCCGGCCGTTGGGCTCTCATAGTG  
GCGGTGCTGTGCTACATCAATCTCCTGAACTACATGGACCGCTTACCGTGGCTGGCGTCCTTCCCGACA  
TCGAGCAGTTCTTCAACATCGGGGACAGTAGCTCTGGGCTCATCCAGACCGTGTTTCATCTCCAGTTACAT  
GGTGTGGCACCTGTGTTTGGCTACCTGGGTGACAGGTACAATCGGAAGTATCTCATGTGCGGGGGCATT

GCCTTCTGGTCCCTGGTGACACTGGGGTCATCCTTCATCCCCGGAGAGCATTTCTGGCTGCTCCTCTGA  
CCCGGGGCCTGGTGGGGGTCGGGGAGGCCAGTTATTCCACCATCGCGCCCACTCTCATTGCCGACCTCTT  
TGTGGCCGACCAGCGGAGCCGGATGCTCAGCATCTTCTACTTTGCCATTCCGGTGGGCAGTGGTCTGGGC  
TACATTGCAGGCTCCAAAGTGAAGGATATGGCTGGAGACTGGCACTGGGCTCTGAGGGTGACACCGGGTC  
TAGGAGTGGTGGCGTTCTGCTGCTGTTCTGGTAGTGCGGGAGCCGCCAAGGGGAGCCGTGGAGCGCCA  
CTCAGATTTGCCACCCCTGAACCCACCTCGTGGTGGGCAGATCTGAGGGCTCTGGCAAGAAATCCTAGT  
TTCGTCTGTCTTCCCTGGGCTTCACTGCTGTGGCCTTTGTACGGGGCTCCCTGGCTCTGTGGGCTCCGG  
CATTCTGCTGCGTTCCCGCTGGTCCTTGGGGAGACCCACCCCTGCCTTCCCGGAGACTCCTGCTCTTC  
CTCTGACAGTCTCATCTTTGGA CTACACCTGCCTGACCGGAGTCTGGGTGTGGGCCTGGGTGTGGAG  
ATCAGCCGCCGGCTCCGCCACTCCAACCCCGGGCTGATCCCCTGGTCTGTGCCACTGGCCTCCTGGGCT  
CTGCACCCTTCTCTTCTGTCCCTTGCTGCGCCCGTGGTAGCATCGTGGCCACTTATATTTTCATCTT  
CATTGGAGAGACCCTCCTGTCCATGA ACTGGGCCATCGTGGCCGACATTCTGCTGTACGTGGTGATCCCT  
ACCCGACGCTCCACCGCCGAGGCCTTCCAGATCGTGCTGTCCACCTGCTGGGTGATGCTGGGAGCCCT  
ACCTCATTGGCCTGATCTCTGACCGCTGCGCCGGA ACTGGCCCCCTCCTTCTGTCCGAGTTCCGGGC  
TCTGCAGTTCTCGCTCATGCTCTGCGCGTTTGTGGGGCACTGGGCGGCGCAGCCTTCTGGGCACCGCC  
ATCTTCATTGAGGCCGACCGCCGGCGGGCACAGCTGCACGTGCAGGGCCTGCTGCACGAAGCAGGGTCCA  
CAGACGACCGGATTGTGGTGCCCCAGCGGGGCGCTCCACCCGCGTGCCCGTGGCCAGTGTGCTCATCTG  
AGAGGCTGCCGCTCACCTACCTGCACATCTGCCACAGCTGGCCCTGGGCCCACCCACGAAGGGCCTGGG  
CCTAACCCCTTGGCCTGGCCCAGCTTCCAGAGGGACCCTGGGCGTGTGCCAGCTCCAGACACTACCTG  
GGTAGCTCAGGGGAGGAGGTGGGGGTCCAGGAGGGGGATCCCTCTCCACAGGGGCAGCCCCAAGGGCTCG  
GTGCTATTTGTAACGGAATAAAATTTGTAGCCAGA

>NM\_001142298.2 Homo sapiens sequestosome 1 (SQSTM1), transcript variant 2, mRNA

GGCTTCCGGCCGCTTCCGCGGCCACCGCCGGGCCCCGCTCCCGCCGCGGACGCCCAGGTGCGCCAGGTGC  
GGGCCGGGCGGGGGTTCGCGCTCACCTTTCTGGCCGCTGAGTGCCGCGTACCAGGACAGCGAGAGGAAGGC  
GCACAGGCAGAAGAGCAGCAGCGTCAGGAAGGTGCCATTGCGGAGCCTCATCTCCTCGGTGTCTGCGAGA  
TTAATCTCTCATGGCCGCTGCACAAGAACCTGGCTTTTAGCTGAACTAAGGAGAAAAGTCCTACAACAGTT  
TGCGTGAACATGGGGCTTGAGAAAGGATGAGGACGGGGACTTGTTGCCTTTTCCAGTGACGAGGAAT  
TGACAATGGCCATGTCCTACGTGAAGGATGACATCTTCCGAATCTACATTAAAGAGAAAAAGAGTGCCG  
GCGGGACCACCGCCACCGTGTGCTCAGGAGGCGCCCCGCAACATGGTGACCCCAATGTGATCTGCGAT  
GGCTGCAATGGGCCTGTGGTAGGAACCCGCTACAAGTGACGCGTCTGCCAGACTACGACTTGTGTAGCG  
TCTGCGAGGGAAAGGGCTTGACCGGGGGCACACCAAGCTCGCATTCCCAGCCCCCTCGGGCACCTGTC  
TGAGGGCTTCTCGCACAGCCGCTGGCTCCGGAAGGTGAAACACGGACACTTCGGGTGGCCAGGATGGGAA  
ATGGGTCCACCAGGAACTGGAGCCACGTCTCTCTGTCAGGGGAGGCCCCGCCCTGGCCCCACGGCAG  
AATCAGCTTCTGGTCCATCGGAGGATCCGAGTGTGAATTTCTGAAGAACGTTGGGGAGAGTGTGGCAGC  
TGCCCTTAGCCCTCTGGGCATTGAAGTTGATATCGATGTGGAGCACGGAGGGAAAAGAAGCCGCTGACC  
CCCGTCTCTCCAGAGAGTTCCAGCACAGAGGAGAAGAGCAGCTCACAGCCAAGCAGCTGCTGCTCTGACC  
CCAGCAAGCCGGGTGGGAATGTTGAGGGCGCCACGCAGTCTCTGGCGGAGCAGATGAGGAAGATCGCCTT  
GGAGTCCGAGGGGCGCCCTGAGGAACAGATGGAGTCGGATAACTGTTACAGGAGGAGATGATGACTGGACC  
CATCTGTCTTCAAAGAAGTGGACCCGTCTACAGGTGAACTCCAGTCCCTACAGATGCCAGAATCCGAAG  
GGCCAAGCTCTCTGGACCCCTCCCAGGAGGGACCCACAGGGCTGAAGGAAGCTGCCTTGTAACCCACATCT  
CCCGCCAGAGGCTGACCCGCGGCTGATTGAGTCCCTCTCCAGATGCTGTCCATGGGCTTCTCTGATGAA  
GGCGGCTGGCTACCCAGGCTCCTGCAGACCAAGAACTATGACATCGGAGCGGCTCTGGACACCATCCAGT  
ATTCAAAGCATCCCCCGCCGTTGTGACCACTTTTGCCACCTCTTCTGCGTGCCCCCTTCTGTCTCATA  
GTTGTGTTAAGCTTGCGTAGAAATTGCAGGTCTCTGTACGGGCCAGTTTCTCTGCCTTCTTCCAGGATCAG  
GGGTTAGGGTGCAAGAAGCCATTTAGGGCAGCAAAACAAGTGACATGAAGGGAGGGTCCCTGTGTGTGTG  
TGTGCTGATGTTTCTGGGTGCCCTGGCTCCTTGACGAGGGGCTGGGCCTGCGAGACCCAAGGCTCACTG  
CAGCGCGCTCCTGACCCCTCCCTGCAGGGGCTACGTTAGCAGCCCAGCACATAGCTTGCCTAATGGCTTT

CACTTCTCTTTTGTTTTAAATGACTCATAGGTCCCTGACATTTAGTTGATTATTTCTGCTACAGACCT  
GGTACACTCTGATTTTAGATAAAGTAAGCCTAGGTGTTGTGAGCAGGCAGGCTGGGGAGGCCAGTGTGT  
GGGCTTCCTGCTGGGACTGAGAAGGCTCACGAAGGGCATCCGCAATGTTGGTTTCACTGAGAGCTGCCTC  
CTGGTCTCTTCACTGCTAGTTCTCTCATTTCCTCAACCATCAGCTGCTTTTAAATAAGATCTCTTTGT  
AGCCATCCTGTAAATTTGTAAACAATCTAATTAAATGGCATCAGCACTTTAACCAATGACGTTTGCATA  
GAGAGAAATGATTGACAGTAAGTTTATTGTTAATGGTCTTACAGAGTATCTTTAAAAGTGCCTTAGGGG  
AACCCTGTCCCTCCTAACAAGTGATCTCGATTAATAACCTGCCAGTCCCAGATCACACATCATCATCGA  
AGTCTTCCCCAGTTATAAAGAGGTCACATAGTCGTGTGGGTGAGGATTCTGTGCCTCCAGGACCAGGGG  
CCCACCCTCTGCCCAGGGAGTCCTTGCCTCCATGAGGTCTTCCCGCAAGGCCTCTCAGACCCAGATGTG  
ACGGGGTGTGTGGCCGAGGAAGCTGGACAGCGGCAGTGGGCCTGCTGAGGCCTTCTCTGAGGCCTGTG  
CTCTGGGGGTCCCTTGCTTAGCCTGTGCTGGACCAGCTGGCCTGGGGTCCCTCTGAAGAGACCTTGGCTG  
CTCACTGTCCACATGTGAACTTTTTCTAGGTGGCAGGACAAATTGCGCCCATTTAGAGGATGTGGCTGTA  
ACCTGCTGGATGGGACTCCATAGCTCCTTCCCAGGACCCCTCAGCTCCCCGGCACTGCAGTCTGCAGAGT  
TCTCCTGGAGGCAGGGGCTGCTGCCTTGTTTACCTTCCATGTCAGGCCAGCCTGTCCCTGAAAGAGAAG  
ATGGCCATGCCCTCCATGTGTAAGAACAATGCCAGGGCCCAGGAGGACCGCCTGCCCTGCCTGGGCCTTG  
GCTGGGCCTCTGGTTCTGACACTTCTGCTGGAAGCTGTCAGGCTGGGACAGGCTTTGATTTTGAAGGTT  
AGCAAGACAAAGCAAATAAATGCCTTCCACCTCACCGCAA

>NM\_003932.5 Homo sapiens ST13 Hsp70 interacting protein (ST13), transcript variant 1, mRNA  
CTTGCGGCAGCCGCCCCCTTCTGCGCGGTCACGCCGAGCCAGCGCCTGGGCCTGGAACCGGGCCGTAGCC  
CCCCAGTTTCGCCCACCACCTCCCTACCATGGACCCCCGCAAAGTGAACGAGCTTCGGGCCTTTGTGAA  
AATGTGTAAGCAGGATCCGAGCGTTCTGCACACCGAGGAAATGCGCTTCTGAGGGAGTGGGTGGAGAGC  
ATGGGTGGTAAAGTACCACCTGCTACTCAGAAAGCTAAATCAGAAGAAAATACCAAGGAAGAAAAACCTG

ATAGTAAGAAGGTGGAGGAAGACTTAAAGGCAGACGAACCATCAAGTGAGGAAAGTGATCTAGAAATTGA  
TAAAGAAGGTGTGATTGAACCAGACACTGATGCTCCTCAAGAAATGGGAGATGAAAATGCGGAGATAACG  
GAGGAGATGATGGATCAGGCAAATGATAAAAAAGTGGCTGCTATTGAAGCCCTAAATGATGGTGAAGTCC  
AGAAAGCCATTGACTTATTCACAGATGCCATCAAGCTGAATCCTCGCTTGCCATTTTGTATGCCAAGAG  
GGCCAGTGTCTTCGTCAAATTACAGAAGCCAAATGCTGCCATCCGAGACTGTGACAGAGCCATTGAAATA  
AATCCTGATTCAGCTCAGCCTTACAAGTGGCGGGGGAAAGCACACAGACTTCTAGGCCACTGGGAAGAAG  
CAGCCCATGATCTTGCCCTTGCTGTAAATTGGATTATGATGAAGATGCTAGTGCAATGCTGAAAGAAGT  
TCAACCTAGGGCACAGAAAATTGCAGAACATCGGAGAAAGTATGAGCGAAAACGTGAAGAGCGAGAGATC  
AAAGAAAGAATAGAACGAGTTAAGAAGGCTCGAGAAGAGCATGAGAGAGCCCAGAGGGAGGAAGAAGCCA  
GACGACAGTCAGGAGCTCAGTATGGCTCTTTTCCAGGTGGCTTTCCTGGGGGAATGCCTGGTAATTTTCC  
CGGAGGAATGCCTGGAATGGGAGGGGGCATGCCTGGAATGGCTGGAATGCCTGGACTCAATGAAATTCTT  
AGTGATCCAGAGGTTCTTGCAGCCATGCAGGATCCAGAAGTTATGGTGGCTTTCAGGATGTGGCTCAGA  
ACCCAGCAAATATGTCAAAATACCAGAGCAACCCAAAGGTTATGAATCTCATCAGTAAATTGTCAGCCAA  
ATTTGGAGGTCAAGCGTAATGTCCTTCTGATAAATAAAGCCCTTGCTGAAGGAAAAGCAACCTAGATCAC  
CTTATGGATGTCGCAATAATACAAACCAGTGTACCTCTGACCTTCTCATCAAGAGAGCTGGGGTGCTTTG  
AAGATAATCCCTACCCCTCTCCCCAAATGCAGCTGAAGCATTTTACAGTGGTTTGCCATTAGGGTATTC  
ATTCAGATAATGTTTTCTACTAGGAATTACAACTTTAAACACTTTTTAAATCTTCAAATATTTAAAA  
CAAATTTAAAGGGCCTGTTAATTCTTATATTTTTCTTTACTAATCATTTTGGATTTTTTCTTTGAATTA  
TTGGCAGGGAATATACTTATGTATGGAAGATTACTGCTCTGAGTGAAATAAAAGTTATTAGTGCGAGGCA  
AACATAACTCATTGAGGATAAAGTTTGTGTTGGATATGTGGTTCCTGATGCATTTTGACTTGTCTTTTT  
AAATGCTTTATCTTTTTCTTTAAAGATTATTTCAATAAACTAATTGGGACCACCCGATTTTCAGTAGG  
ACCTGGGTAGGGATTGGAAGTACTTGGCAGGGCAGCAGCAATCTTGCTGTGTTTGATATAACATGCATCC  
TTGGGCAGGTTGCCCTTAAATCTTACACTGTGGTGAAGGGATGTTTTTTTTGTAATGCTGCAGTAGAGTT  
GGAGTACTTAGTTCTCTTGTTGTCCAGTATATCTAATAAGTGTTTTTCATATTATTTCCACGTAAGGGAA  
ATAAGGTAGTACTTTTCTTTTATATTTCTATGCTTAAATTCTCTTTCCTAGTCAAAAATTGCCCAAAT

CTGTGTTTGCTTTCTGCTTGCTACATTTGTCTCCCTTACTTTTCTTGAGCTAAAGACAGGCTTTTTCCAC  
CGGCATCATCACTGCTATCATCATTAACAGCGTAATTATACAAGCATATTTAATGCTGAGTTTAATTTAA  
TATGTAATACATATGGTAATTGTAGGGTAATACCCACAACAACCTGTAGTTTCTTACTTGGCCAAGAGAAT  
GCTTATTTAAGTGTTAGACTTCCATTCTGGCAAAATCTTGCCTTATCAGAAGACATTGGAAAGAGGGATT  
CCCTTTGGTGTTTGGTCTTCTACTTAGAAAAACCTATTGCAGTTAGTTTATCTTGTAGTATTCATCTTTG  
TATTCTGAAGATAAGGTTTGAATTAAATTGATACACAGAGGGGAACCGATTTTTTTTATCCAATGTGA  
ATTATAAATGAGATAATCCACAGTTATTCATTGTGGAGTTGTTGAGACTATGAAAGACTCATTGTCTTTG  
TATTCAGCTCTTAAATAGTGTAATATATCCCCACCTCTGCTTGCTTTCTTTCCCTCCCCTCCAATGATA  
AAGAAAATGATAAATTTTCTGTTGTGCATTCAATTCTTATTTTAAATAAGACTAAGTATAGGCATTGTAC  
CTGACATTGCTACGTTTCTACCAGTGTTCATTTAAAGTGCTAGTGTTTAAAAACATTTTCAAGGGATA  
AGGCCTTCTGTACTTTGCTTATTTGAAGAATCAGTGGTAGGAGCAGTGAAGTAAATTCTATGGAGTACAT  
TTCTAAAATACCACATTTCTGAAATCATAAATAAGTTTATTCAGGTTCTAACCCTTTGCTGTACACAAGC  
AGACAGAAATGCATCTGTTACATAAATGAGAAAAAGCTATTATGCTGATGGAGCATGCTTTTTAAATCCT  
TTAAAAACACTCACCATATAAACTTGCAATTTGAGCTTGTGTGTTCTTTTGTTAATGTGTAGAGTTCTCCT  
TTCTCGAAATTGCCAGTGTGTACTTGGCTTAACTCAAGAACAGTTTCTTCTGGATTCTTATTTGATTTA  
TTTAACCTAATTATATTCTAATATTGCAAATATTACCATAAGTGGGTAAAAGTAAAATTCCTCTTCTGAA  
AATGTGTCCTGTGCTTTTAGATTTTTAAATCCATAATATACATTCTTAATTTCAACTCAA

>NM\_000455.5 Homo sapiens serine/threonine kinase 11 (STK11), transcript variant 1, mRNA  
GAGGTAAACAAGATGGCGGCGGCGTGTCTGGGCGCGGAAGGGGGAGGCGGCCCGGGGCGCCCGCGAGTGAG  
GCGCGGGGCGGCGAAGGGAGCGCGGGTGGCGGCACTTGCTGCCGCGGCCTTGATGGGCTGGGCCCCCT  
CGCCGCTCCGCTCCTCCACACGCGCGGCGGCCGCGGCGAGGGGGACGCGCCGCCCGGGGCGCCGCGCACCT  
TCGGGAACCCCCGGCCCGGAGCCTGCGGCCTGCGCCGCTCGGCCGCCGGGAGCCCCGTGGAGCCCCCG

CCGCCGCGCCGCCCGCGGACCGGACGCTGAGGGCACTCGGGGCGGGGCGCGCGCTCGGGCAGACGTTTG  
CGGGGAGGGGGGCGCCTGCCGGGCCCCGGCGACCACCTTGGGGGTGCGGGGCCGGCTCGGGGGGCGCCCA  
GTGCGGGCCCTCGCGGGCGCCGGGCAGCGACCAGCCCTGAGCGGAGCTGTTGGCCGCGGCGGGAGGCCTC  
CCGGACGCCCCCAGCCCCCGAACGCTCGCCGGGCGGCGGGAGTCGGCGCCCCCGGGAGGTCCGCTC  
GGTCGTCCGCGGCGGAGCGTTTGCTCCTGGGACAGGCGGTGGGACCGGGGCGTCGCCGGAGACGCCCCCA  
GCGAAGTTGGGCTCTCCAGGTGTGGGGGTCCCGGGGGGTAGCGACGTCGCGGACCCGGCCTGTGGGATGG  
GCGGCCCCGAGAAGACTGCGCTCGGCCGTGTTCACTTGTCCGTGGGCCTGAGGTCCCCGGAGGATGAC  
CTAGCACTGAAAAGCCCCGGCCGGCCTCCCCAGGGTCCCCGAGGACGAAGTTGACCCTGACCGGGCCGTC  
TCCCAGTTCTGAGGCCCGGGTCCCACTGGAAGTTCGCGTCTGAGCCGCCGTCCCGGACCCCCGGTGCCCGC  
CGGTCCGCAGACCCTGCACCGGGCTTGACTCGCAGCCGGGACTGACGTGTAGAACAATCGTTTCTGTTG  
GAAGAAGGGTTTTTCCCTTCCTTTTGGGGTTTTTGTTGCCTTTTTTTTTCTTTTTCTTTGTAAATTT  
TGGAGAAGGGAAGTCGGAACACAAGGAAGGACCGCTACCCGCGGACTCAGGGCTGGCGGCGGGACTCCA  
GGACCCTGGGTCCAGCATGGAGGTGGTGGACCCGCAGCAGCTGGGCATGTTACGGAGGGCGAGCTGATG  
TCGGTGGGTATGGACACGTTTCATCCACCGCATCGACTCCACCGAGGTCATCTACCAGCCGCGCCGCAAGC  
GGGCCAAGCTCATCGGCAAGTACCTGATGGGGGACCTGCTGGGGGAAGGCTCTTACGGCAAGGTGAAGGA  
GGTGCTGGACTCGGAGACGCTGTGCAGGAGGGCCGTCAAGATCCTCAAGAAGAAGAAGTTGCGAAGGATC  
CCCAACGGGGAGGCCAACGTGAAGAAGGAAATTCAACTACTGAGGAGGTTACGGCACAAAAATGTCATCC  
AGCTGGTGGATGTGTTATACAACGAAGAGAAGCAGAAAATGTATATGGTGATGGAGTACTGCGTGTGTGG  
CATGCAGGAAATGCTGGACAGCGTGCCGGAGAAGCGTTTCCAGTGTGCCAGGCCACGGGTACTTCTGT  
CAGCTGATTGACGGCCTGGAGTACCTGCATAGCCAGGGCATTGTGCACAAGGACATCAAGCCGGGGAACC  
TGCTGCTCACCACCGGTGGCACCCCTCAAATCTCCGACCTGGGCGTGGCCGAGGCACTGCACCCGTTGCG  
GGCGGACGACACCTGCCGGACCAGCCAGGGCTCCCCGGCTTCCAGCCGCCGAGATTGCCAACGGCCTG  
GACACCTTCTCCGGCTTCAAGGTGGACATCTGGTCGGCTGGGGTCACCCTCTACAACATCACCACGGGTC  
TGTACCCCTTCAAGGGGACAACATCTACAAGTTGTTTGAGAACATCGGGAAGGGGAGCTACGCCATCCC  
GGGCGACTGTGGCCCCCGCTCTCTGACCTGCTGAAAGGGATGCTTGAGTACGAACCGGCCAAGAGGTTTC

TCCATCCGGCAGATCCGGCAGCACAGCTGGTTCCGGAAGAAACATCCTCCGGCTGAAGCACCAAGTGCCCA  
TCCCACCGAGCCCAGACACCAAGGACCGGTGGCGCAGCATGACTGTGGTGCCGTACTTGGAGGACCTGCA  
CGGCGCGGACGAGGACGAGGACCTCTTCGACATCGAGGATGACATCATCTACACTCAGGACTTCACGGTG  
CCCGGACAGGTCCCAGAAGAGGAGGCCAGTCACAATGGACAGCGCCGGGGCCTCCCCAAGGCCGTGTGTA  
TGAACGGCACAGAGGCGGCGCAGCTGAGCACCAAATCCAGGGCGGAGGGCCGGGGCCCCCAACCCTGCCCCG  
CAAGGCCTGCTCCGCCAGCAGCAAGATCCGCCGGCTGTCGGCCTGCAAGCAGCAGTGAGGCTGGCCGCT  
GCAGCCCGTGTCCAGGAGCCCCGCCAGGTGCCCGCGCCAGGCCCTCAGTCTTCTGCCGGTTCCGCCCCG  
CCTCCCGGAGAGGTGGCCGCATGCTTCTGTGCCGACCACGCCCCAGGACCTCCGGAGCGCCCTGCAGGG  
CCGGGCAGGGGGACAGCAGGGACCGGGCGCAGCCCTCCCCCTCGGCCGCCGGCAGTGCACGCGGCTTG  
TTGACTTCGACGCCCCGGGCGGAGCCTTCCCGGGCGGGCGTGGGAGGAGGGAGGCGGCCTCCATGCACTT  
TATGTGGAGACTACTGGCCCCGCCGTGGCCTCGTGCTCCGCAGGGCGCCCAGCGCCGTCCGGCGGCCCC  
GCCGCAGACCAGCTGGCGGGTGTGGAGACCAGGCTCCTGACCCGCCATGCATGCAGCGCCACCTGGAAG  
CCGCGCGGCCGCTTTGGTTTTTTGTTTGGTTGGTTCCATTTCTTTTTTCTTTTTTTTTTAAGAAAAA  
ATAAAAGGTGGATTTGAGCTGTGGCTGTGAGGGGTGTTTGGGAGCTGCTGGGTGGCAGGGGGGCTGTGGG  
GTCGGGCTCACGTGCGGGCCGCCTTTGCGCTCTCGGGTCACCCTGCTTTGGCGGCCCCGGCCGGAGGGCAG  
GACCCTCACCTCTCCCCAAGGCCACTGCGCTCTTGGGACCCCAGAGAAAACCCGGAGCAAGCAGGAGTG  
TGCGGTCAATATTTATATCATCCAGAAAAGAAAAACACGAGAAACGCCATCGCGGGATGGTGCAGACGCG  
GCGGGGACTCGGAGGGTGCCGTGCGGGCGAGGCCGCCAAATTTGGCAATAAATAAAGCTTGGGAAGCTT  
GGA

>NM\_013254.4 Homo sapiens TANK binding kinase 1 (TBK1), mRNA

GGAAGTGTCTGAGTCTCGAGGAGGCCGCGGGAGCCCCCGGCGGTGGCGCGGCGGAGACCCGGCTGGTA  
TAACAAGAGGATTGCCTGATCCAGCCAAGATGCAGAGCACTTCTAATCATCTGTGGCTTTTATCTGATAT

TTTAGGCCAAGGAGCTACTGCAAATGTCTTTCGTGGAAGACATAAGAAAACTGGTGATTTATTTGCTATC  
AAAGTATTTAATAACATAAGCTTCCTTCGTCCAGTGGATGTTCAAATGAGAGAATTTGAAGTGTGAAAA  
AACTCAATCACAAAAATATTGTCAAATTATTTGCTATTGAAGAGGAGACAACAACAAGACATAAAGTACT  
TATTATGGAATTTTGTCCATGTGGGAGTTTATACACTGTTTTAGAGAAGAACCTTCTAATGCCTATGGACTA  
CCAGAATCTGAATTCTTAATTGTTTTGCGAGATGTGGTGGGTGGAATGAATCATCTACGAGAGAATGGTA  
TAGTGCACCGTGATATCAAGCCAGGAAATATCATGCGTGTTATAGGGGAAGATGGACAGTCTGTGTACAA  
ACTCACAGATTTTGGTGCAGCTAGAGAATTAGAAGATGATGAGCAGTTTGTCTCTGTATGGCACAGAA  
GAATATTTGCACCCTGATATGTATGAGAGAGCAGTGCTAAGAAAAGATCATCAGAAGAAATATGGAGCAA  
CAGTTGATCTTTGGAGCATTGGGGTAACATTTTACCATGCAGCTACTGGATCACTGCCATTTAGACCCTT  
TGAAGGGCCTCGTAGGAATAAAGAAAGTGATGTATAAAATAATTACAGGAAAGCCTTCTGGTGCAATATCT  
GGAGTACAGAAAGCAGAAAATGGACCAATTGACTGGAGTGGAGACATGCCTGTTTCTTGCAGTCTTTCTC  
GGGGTCTTCAGGTTCTACTTACCCCTGTTCTTGCAAACATCCTGAAGCAGATCAGGAAAAGTGTTGGGG  
TTTTGACCAGTTTTTTGCAGAACTAGTGATATACTTCACCGAATGGTAATTCATGTTTTTTCGCTACAA  
CAAATGACAGCTCATAAGATTTATATTCATAGCTATAATACTGCTACTATATTTTCATGAACTGGTATATA  
AACAAACCAAAATTATTTCTTCAAATCAAGAACTTATCTACGAAGGGCGACGCTTAGTCTTAGAACCTGG  
AAGGCTGGCACAACATTTCCCTAAACTACTGAGGAAAACCTATATTTGTAGTAAGCCGGGAACCTCTG  
AATACCATAGGATTAATATATGAAAAAATTTCCCTCCCTAAAGTACATCCACGTTATGATTTAGACGGGG  
ATGCTAGCATGGCTAAGGCAATAACAGGGGTTGTGTGTTATGCCTGCAGAATTGCCAGTACCTTACTGCT  
TTATCAGGAATTAATGCGAAAGGGGATACGATGGCTGATTGAATTAATTAAGATGATTACAATGAACT  
GTTACAAAAAAGACAGAAGTTGTGATCACATTGGATTTCTGTATCAGAAACATTGAAAAAAGTGTGAAAG  
TATATGAAAAGTTGATGAAGATCAACCTGGAAGCGGCAGAGTTAGGTGAAATTTAGACATACACACCAA  
ATTGTTGAGACTTTCCAGTTCTCAGGGAACAATAGAAACCAGTCTTCAGGATATCGACAGCAGATTATCT  
CCAGGTGGATCACTGGCAGACGCATGGGCACATCAAGAAGGCACTCATCCGAAAGACAGAAATGTAGAAA  
AACTACAAGTCCTGTAAATTGCATGACAGAGATTTACTATCAGTTCAAAAAAGACAAAGCAGAACGTAG  
ATTAGCTTATAATGAAGAACAAATCCACAAATTTGATAAGCAAAAAGTATTACCATGCCACAAAAGCT

ATGACGCACTTTACAGATGAATGTGTTAAAAAGTATGAGGCATTTTTGAATAAGTCAGAAGAATGGATAA  
GAAAGATGCTTCATCTTAGGAAACAGTTATTATCGCTGACTAATCAGTGTTTTGATATTGAAGAAGAAGT  
ATCAAAATATCAAGAATATACTAATGAGTTACAAGAACTCTGCCTCAGAAAATGTTTACAGCTTCCAGT  
GGAATCAAACATACCATGACCCCAATTTATCCAAGTTCTAACACATTAGTAGAAATGACTCTTGGTATGA  
AGAAATTAAGGAAGAGATGGAAGGGGTGGTTAAAGAACTTGCTGAAAATAACCACATTTTAGAAAGGTT  
TGGCTCTTTAACCATGGATGGTGGCCTTCGCAACGTTGACTGTCTTTAGCTTTCTAATAGAAGTTTAAGA  
AAAGTTTCCGTTTGACAAGAAAATAACGCTTGGGCATTAAATGAATGCCTTTATAGATAGTCACTTGTT  
TCTACAATTCAGTATTTGATGTGGTCGTGTAATATGTACAATATTGTAAATACATAAAAAATATACAAA  
TTTTTGGCTGCTGTGAAGATGTAATTTTATCTTTAACATTTATAATTATATGAGGAAATTTGACCTCAG  
TGATCACGAGAAGAAAGCCATGACCGACCAATATGTTGACATACTGATCCTCTACTCTGAGTGGGGCTAA  
ATAAGTTATTTCTCTGACCGCCTACTGGAAATATTTTAAAGTGGAACCAAATAGGCATCCTTACAAAT  
CAGGAAGACTGACTTGACACGTTTGTAATGGTAGAACGGTGGCTACTGTGAGTGGGGAGCAGAACCGCA  
CCACTGTTATACTGGGATAACAATTTTTTTGAGAAGGATAAAGTGGCATTATTTTATTTTACAAGGTGCC  
CAGATCCCAGTTATCCTTGATCCATGTAATTCAGATGAATTATTAAGCAAACATTTTAAAGTGAATTC  
ATTATTA AAAACTATTCATTTTTTTCTTTGGCCATAAATGTGTAATTGTCATTA AAATCTAAGGTCAT  
TTCAACTGTTTTAAGCTGTATATTTCTTTAATTCTGCTTACTATTTTCATGGAAAAAATAAATTTCTCAA  
TTTTAATGTAAA

>NM\_006405.7 Homo sapiens transmembrane 9 superfamily member 1 (TM9SF1), transcript variant 1, mRNA

ACCGCGCCGCTGTGGGAGAGACCCAGCAGGAGCCCAAAGGCAGCTACGGGGGCGCGAAGGCCGCTGGCG  
CCGCCTCGGCCAGCCCTCCCGCGCGGTTCCACTGCCTTAAGGATGACAGTCGTAGGGAACCCTCGAAGT  
TGGAGCTGCCAGTGGTTGCCAATCCTGATACTGTTGCTGGGCACAGGCCATGGGCCAGGGGTGGAAGGCG  
TGACACACTACAAGGCCGGCGACCCTGTTATTCTGTATGTCAACAAAGTGGGACCCTACCATAACCCTCA  
GGAAACTTACCACTACTATCAGCTTCCAGTCTGCTGCCCTGAGAAGATACGTCACAAAAGCCTTAGCCTG

GGTGAAGTGCTGGATGGGGACCGAATGGCTGAGTCTTTGTATGAGATCCGCTTTCGGGAAAACGTGGAGA  
AGAGAATTCTGTGCCACATGCAGCTCAGTTCTGCACAGGTGGAGCAGCTGCGCCAGGCCATTGAAGAACT  
GTACTACTTTGAATTTGTGGTAGATGACTTGCCAATCCGGGGCTTTGTGGGCTACATGGAGGAGAGTGGT  
TTCCTGCCACACAGCCACAAGATAGGACTCTGGACCCATTGGACTTCCACCTAGAATTCCATGGAGACC  
GAATTATATTTGCCAATGTTTCAGTGCGGGACGTCAAGCCCCACAGCTTGGATGGGTTACGACCTGACGA  
GTTCTAGGCCTTACCCACACTTATAGCGTGCCTGGTCTGAGACTTCAGTGGAGCGTCGGAGTGACAGG  
CGCCGTGGTGACGATGGTGGTTTTCTTCCTCGAACACTGGAAATCCATTGGTTGTCCATCATCAACTCCA  
TGGTGCTTGTGTTTTACTGGTGGGTTTTGTGGCTGTCATTCTAATGCGTGTGCTTCGGAATGACCTGGC  
TCGGTACAACCTAGATGAGGAGACCACCTCTGCAGGTTCTGGTGATGACTTTGACCAGGGTGACAATGGC  
TGGAATAATTATCCATACAGATGTCTCCGCTTCCCCCATACCGTGGTCTGCTCTGTGCTGTGCTTGGCG  
TGGGTGCCCAGTTCCTGGCCCTTGGCACTGGCATTATTGTCATGGCACTGCTGGGCATGTTCAATGTGCA  
CCGTCATGGGGCCATTAACTCAGCAGCCATCTTGTGTATGCCCTGACCTGCTGCATCTCTGGCTACGTG  
TCCAGCCACTTCTACCGGCAGATTGGAGGCGAGCGTTGGGTGTGGAACATCATTCTCACCACCAGTCTCT  
TCTCTGTGCCTTTCTTCCTGACGTGGAGTGTGGTGAACTCAGTGCATTGGGCCAATGGTTCGACACAGGC  
TCTGCCAGCCACAACCATCCTGCTGCTTCTGACGGTTTGGCTGCTGGTGGGCTTTCCCTCACTGTCATT  
GGAGGCATCTTTGGGAAGAACAACGCCAGCCCCTTTGATGCACCCTGTCGCACCAAGAACATCGCCCCGG  
AGATTCCACCCCAGCCCTGGTACAAGTCTACTGTCATCCACATGACTGTTGGAGGCTTCTGCCTTTAG  
TGCCATCTCTGTGGAGCTGTACTACATCTTTGCCACAGTATGGGGTCGGGAGCAGTACACTTTGTACGGC  
ATCCTCTTCTTTGTCTTCGCCATCCTGCTGAGTGTGGGGGCTTGCATCTCCATTGCACTCACCTACTTCC  
AGTTGTCTGGGGAGGATTACCGCTGGTGGTGGCGATCTGTGCTGAGTGTGGCTCCACCGGCCTCTTCAT  
CTTCCTCTACTCAGTTTTCTATTATGCCCGGCGCTCCAACATGTCTGGGGCAGTACAGACAGTAGAGTTC  
TTCGGCTACTCCTTACTCACTGGTTATGTCTTCTTCTCATGCTGGGCACCATCTCCTTTTTTTCTTCCC  
TAAAGTTCATCCGGTATATCTATGTAACTCAAGATGGACTGAGTTCTGTATGGCAGAACTATTGCTGT  
TCTCTCCCTTTCTTCATGCCCTGTTGAACTCTCTACCAGCTTCTTCTGATTGACTGAATTGTGTGAT  
GGCATTGTTGCCTTCCCTTTTGGCCTTGGGCATTCTTCCCCAGAGAGGGCCTGGAAATTATAAATCTC

TATCACATAAGGATTATATATTTGAACTTTTTAAGTTGCCTTTAGTTTTGGTCCTGATTTTTCTTTTAC  
AATTACCAAATAAAATTTATTAAGAAAAA

>NM\_001165030.3 Homo sapiens transmembrane protein 41B (TMEM41B), transcript variant 2, mRNA

GCAGTACTCGCTGGGCTGAGGTCGTCTCGGGTGAGGAGGTCGCGCCGGAAGTGGCTCTAGCCGTGGCGCT  
TCGGCGTAGTAAGGAGCCTGCAACAGAGTTTTGTTGTTTAGGGGGCGCGGCACCGCACCGCTCCCTTCAC  
CTTGCAGCAGCCATGGCGAAAGGCAGAGTCGCCGAACGATCGCAGTTGGGCGCTCACCACACGACCCCCG  
TGGGGGACGGGGCAGCGGGGACGCGGGGTCTCGCGGCGCCTGGCAGCAGAGACCACCAGAAGGAAAAATC  
CTGGGTAGAAGCTGGATCAGCAAGAATGTCACTCCTTATATTGGTGTCCATTTTCTTATCTGCAGCTTTT  
GTTATGTTTTTGGTATATAAAAATTTTCCTCAGCTTAGTGAAGAAGAAAGAGTGAATATGAAGGTCCCA  
GAGATATGGATGATGCCAAGGCTCTAGGAAAAGTTTTATCCAAATACAAGGACACCTTTTATGTTCAAGT  
ACTTGTAGCTTATTTTGCTACATATATTTGTATCCTTTTAACTGAAAAAATGTTTTCTAATTTTGTTCA  
AGAAAAAGTGTAAGGTCTGCTCTTCATTTATACATAACTATTTTCCTTTTAAAAATTTGTTATTGCAGT  
GTGACAATATTAATAATTGAAAAATTAATGGAAAAAATTATCACTTTAA

>NM\_153015.3 Homo sapiens transmembrane protein 74 (TMEM74), transcript variant 1, mRNA

GGAGCCGAGCGGCGTGCAGAGGCTACAAGTGCCGTAGCTGGTGATTGGGGGACTTTCTCCGGGAACCGTG  
CCGGGAGAGCGCGCGGTGCTGGAGCCGCACCGGGTGGCCGAAGCAGAAGACTTTCCGGAAGCTGCTGGGG  
GATGTCTGACTAGCTCTCATGGAGCTCCACTACCTTGCTAAGAAGAGCAACCAGGCAGACCTCTGTGATG  
CCAGGGACTGGAGTTCAAGAGGGCTGCCTGGTGACCAGGCAGATACAGCAGCCACAAGAGCTGCTCTCTG

CTGTCAGAAACAGTGTGCATCCACCCCAAGAGCAACCGAGATGGAAGGGTCTAAACTTAGTTCTTCTCCA  
GCATCCCCCTCCTCTCTCTGCAAAACAGTACTCTTCAGCCAGATGCCTTTCACCAGGACTTCTCCACT  
CAGGGAACAACCAAATAACAGCGGAACGGAAAGTCTGTAAGTCTGCTGCAGCCAGGAATTAGAAACTTCTTT  
TACCTATGTGGACAAAAACATCAACTTGGAGCAGCGGAACCGGAGCTCGCCATCAGCAAAAGGGCATAAT  
CACCTGGGGAGCTTGGCTGGGAAAATCCAAATGAGTGGTCCCAAGAGGCTGCCATATCTTTGATATCTG  
AAGAGGAGGATGATACAAGTTCAGAAGCCACGTCTTCAGGGAAGTCTATAGACTATGGTTTCATCAGCGC  
CATCTTGTTCTTGGTCACTGGGATCCTGCTCGTGATCATCTCTTACATCGTCCACGGGAAGTGACTGTG  
GACCCCAACACTGTGGCAGCCCGGGAGATGGAGCGCCTGGAGAAGGAGAGTGCGAGGCTGGGGGCTCACC  
TGGACCGCTGTGTGATTGCGGGGCTCTGCCTCCTCACGCTGGGGGGCGTCATCCTGTCTGCTTGTTAAT  
GATGTCCATGTGGAAGGGGGAGCTCTATCGTCGAAACAGATTTGCCTCTTCAAAGAGTCTGCAAACTC  
TATGGTTCTTTCAACTTCAGGATGAAAACCAGCACGAATGAAAACACTCTGGAAGTGCCTTGGTAGAGG  
AAGATGCGCTTGCTGTACAGAGTTAATTCTGGTTGTGAATATCTTGAGAGTCTGCCTTGGCATTATATAA  
TATGAAAAAAGTTAATTTATAAAAAATTCACAGTGCAATTTATTTGCCTGGCAAGAAAAGTTTATTTACA  
AACCAACAGCCAGTAAGTGTTTTTGTCTCTATGTGTCTTCTATTTAGAAGAAAAGCCATGTAAGATGTA  
TAAGAAACCACAACCAGCCACACCTATCCTTCTGAAGAGCTGAAGGCTAATTAATCTGTAATGGCCAAGA  
ACTTCTACTTCGATAGAAAAATATTTCTAATGACCCAGTCTACAAATTATTTCTTTACACAAATATATG  
ATGTTATTCTTTGGACACTAGGTGGTCCTACACACAGTAGGATCAATTGCTAATCTACTTTGTGAAAAAG  
AACTAAGCACTAATCAATAATAAGGCTTACATCTAATTCTCAAAGGTGCTTATCCATTTTCTTGCTAAAT  
TATCCTTCTTGTAATTTGGCTAAACACTAAAACATGGAATTTTGTAGTTTGAATATTTTGAAGTTTGAGGA  
TGTTGGGCTTTCCTTATTGTAAAAAATGTTATGTTTGAAATTATTCCTGTTTTCAAAAATGGTAATTAAG  
TCATTAGGATAAACTTTCTAATAAAAAAAATTATGTAAATCATTGTAAGACCAATGTGAATTTAAACCA  
CAGTGTTGGTGCCAGATATTAGCCAGGGTCACAGGCTCTTTTTTAAAATGAAGTCAAATTAGTTACTGAT  
ATAAGTTTTATATTTTGATTTTGCCATCATACTGGTTATCTGTGCTCTTGAAGTCTGCTGGTTCTCAC  
ACCAGCAGCAAGAGGCAAGGCATGAGACATTTTAAATATATTTCCAGACATCTAAACATCTAGACAGGCC  
TGAGTCATGATTGGCTCTGGTGTGCTCCAGGTAACATCTTGTTATTGCTGTTGGGGAAAACCAACAT

AGAATTGCAGCTAGACTTTTGGGGACTGTGCCTCGCAGGCTGTATCACTTGCTGTAGGCCAAGCAACGAG  
CACTTCCCTCATGGTAGCAACAGTCCTTAAGCCCAAAGCCAAAAAAAATAAAATGGAAAGAGAGATTCA  
ATACACTGATTTAATGGGGACTGTAGTCATCGTCAGAACTCACCTCCCACTCACAGTGGTCTAGATGTCA  
TTCAGCAACTGTGAACTCTTGCCCTCATGCAGCACAACTCTTCTCTAAGAGCAGCATGATGAGCAAGGTG  
CTCACTTTGCAAGACACACACTGGGTGTTACAGTGACAGACCGCCTCATTATGGTGACGGTTCAGAAAA  
GGGATGGGAAATGCAGCCTCAGAAATACCTTACATTTTGCAACTCTGCCTGGAGGTTTTTCCAACCTGTG  
CTCTAAGAGTTGTTGTAACCTCCATGATTGTGTTACCAGGATCAGGGGGTCATTCTTAAAAAGAGGACAG  
GAGCTGGGAATTGGTATGAGACAGCAGGAATGAGGAAGTAAGAAAGTGATTTCTTTGCAGATTTTTAAAG  
GCTATTTCAAATGTCTGAAGTTTGTGGTGTTGTGGACAACTGTGGAATACATGGGTGACTTTGGCAAAAT  
GTGTGAATCAGGATATTTATGTGGATGAGCTCTCATGGGTGTCAGATTGATTTGATGAGTGAGGTATGCT  
GCATATGACTTAAGGGTTGAACTGAAATACAAAAAGGGAGGCTCAGAAGATAGTAAAAAGAGAGGATGGG  
CATATGAAAGAATTATTAAGTAAAAATGAGAAATTATATGGCCATCAGAGGAAGCTAGATGTAGTTAATT  
GCCTTATGTTATAGAGCAATACTGATTACTGAAAAGAAAGAATTGAGATGACATAAACATGATTTTTGCT  
TTCTGTTGCTGTATTTTTGTGCTTTTTGAACAACTTTGTTTTACTGTGACTCTCATTTTCATGATTTTTG  
TTGAGGCTGCCTTACCAGTGGTATAAGTTTTATATTCTGAAGGTTTCTAAGTCCAGCTCTAGCCTGCTTA  
AGGATCCACTTTGGATGATGTTGAAACAAGAAGGAAACGATCTGCTGAGTGAGTAGGTCTGAGCTGTGTG  
TTAAAAAAGAAGGCATTAAAAAAGAAGGCATTAAAGAAAAAACTAATGTTTATTCATAGAAGCTAAA  
TGAGATCAACTGAGTTTTTATTTATTGGTGAAACAGGATTAATTAGCCAAATGGCAGACTAACTGAATT  
AATGTGGAATCAATTTTCAGTTTATGAAGGAAGAGGAGTTTGGGAATCAAGTGTTAGGAGGTCTTTTCAC  
TTGATAATAAAGCTTTTCATGTGGAAGCATTTAATGAATCTTGAGGGCTACCAAATAATATAGATTTGA  
TCTAGAGGTAACATTTTGAAAAATGCCATTTTGAAAAAAAATATTCAACGGGGGAGAAAAAGACCTAAC  
ACATCAAATACATTTCTTTCTTTCCCTAGAATGCTATAATTTCTTTAAAAATTTAAATCGAAATGT  
GGTAAGTAAATGCACACTTCAACATTATTTAAATCTGCTAACATATAGAGCACCTCTCTTTTAAGGTCT  
ACTTATCTGAGGGCAAACCATACACATTACATGATTTTGAAAATCATCTGAATGACTTCTTTTGGGCTG  
TGGTGACATTATTCAGATACTTGCCCTAATCGACTTTTCCCTGGGTATTTGGTTTATGTAGCCCTTATCC

ATCCTGCCTGAATTCAATATGAAGATTACTTGAATTTAAATGATGGTAACACAGGCAAAGAAAAGCCAT  
GTGCTTTATTTCTGTTTTTCCAATCTGACAAAGAGTGTTTTGGCTCTAGAGGTACTTTGGCAAGACC  
AGGTGATGCATTCTATAGACATTGGGCATACAATACCTATAGTTTTGGTCTTGCATCCTTCATGGAGATT  
TGTGACCTCCGTCTGTCTCTTCAATATGGTGCTGGTTGTTACCTGTGAAAGTTTTTATTGCTAGTCCTA  
GAGAAGAAAAACATATTTCACTGGTCTAGGTCTTTAGCTTATTTACATGGTTTTAGAAATCTAACTCA  
AGAGTCATCTTCCTAGTCTCAATGAGAAGACAGCTCGTCTTTCAGCAGTGTGGCCCAATGGGGTGAGTTA  
CAGAAAGAAAGCTGTCTTCTCCTTTATTACTGGGATCTACACGCTGCTGGTGGATGATTTAAGGCTCCT  
AATATCTTTATAAGCCAGTTCTTTTTAGGGCACCTTAACTGTTAGTGGTAGAGTTTGCAAAGAGTTTTG  
TTTGCAGCGCTGTGTGTCCTTCCCACCCATTGGGAGCTCTTAAAGCAGATCACATAATAAGATGTACTGG  
CCCCTCATATAAAGAACAGCTTTTCGTGCTGCTCCCACTGTGTAGGTGATTTATAGTTTACAGGAAGAC  
AAGACTGCTTGAACCATGAAGTTCTTGGAGGCCATGGTTGCTTTTACCCACATGACTGCTATAACCCCT  
GATTCTGTTCTATCAAGTTACTTGCCTTGATATCATCACATGCTTTGCTGTCTGCTTAAAATATGAGTTC  
ATCCCCCTCATACTTATTTGTTTTAGGGACCCAATTGGACCAGTGCTGGCACATGCCCTTCAAGGTACAA  
TTTCTGAAAAGAGACTGCGCTGCCAACTTATGTGTGCCTTTACCTCAGTCCCCCAGTATAAGGGGTGA  
CTTAATCTTGATAAATGAGTGACTGAGCACCATGCTAGTTAAATATTGAGAATTAAGCCTGAACCCAA  
TGGCTCTATTTTTTTTTACCACCTTCTGACAAGCAAAAATTCTAGGCAGGAGCATGTGAACATTTTGGTC  
TTCATCTTTACGTGTGCAATGATAGGTGTATGCAAAATTTTACTTGGATTAATTGTCAAGTTAAAAAAG  
TGTTCTATATGTATATCTCTTAGGAGAAGGTTTTTCAACCTGAAGGTCAGATTTTATTGCAGCAATTAAT  
GCCATCAAAAAAACGTGGTCTGACAAAAAGATTCAACCTTTGCCAGTGGTTCACCTATTACAGCAAG  
ATGTAATACTATCAATACTTACTGTTCTCTGTAATGGGTTTAACTTTCCAGAATTGGACATAAAGAAT  
GACTACGATGAGAAGATTATAATGAAGTCTTACTGGCTTTTCCTAGTCTAAAAAGAGTACTTAAGAAAGA  
GAATTAACATATCATTTCTTTTGGCTGATTTTATAGCTATATCTGTTTTTGGTTCATAATATTCTATATT  
ATCATCTCACAAATTTTATAAGTCTTGGGAAATAATTTGCCTGCCTAGTGAATTGACACTGTAAAAAGCA  
AGACGTTATTTTAAACACATAAACTAATTTCAAGAATCTGTGGCTTACACTCAAGAGTGACTCGTGGT  
TTATGTTTGTGTGCAGATTTATGTGCACTCAAGTCTATGTGCATTTGGACTATATTTTATAGTTATACAG

CTTAATATCCAAAGTTATTGTTAGAATAATTTTATTATAGGAATTTGGCATGCCTTACTATTGACATTA  
AGAAGAAGAGAAGTCTTTCACAAGTCATGAATGAAGAATTTGGAATCAGCCTCAGAATGAGATGCCATAA  
TTATTATAAACCTGTTTTGGTTGTTGAGCCTCCACAAATATTTATTAATTTGTTTTTAACTCTCAAT  
TTCAGGCTCATGAGAGTGTGAGATATTTGGAAATTATTTTACCGTGAATTGTTATTTTATTTAGGGGAC  
TATGGGGAGTATATTCCTTTGTTTCAAATTTGGGTAACCTCTCTGTGTTTCAGGAACAGCTCTCCCTATT  
TTTTCACTGCCATCTTCAGGCTTCCTAGCCAGGCTCCAAACAAATGTCATATAAGAAAGAAAGATTAATT  
ATTACATATTGTGTATTGAGAGTTTGTACCCTGTGGTTCTCATCGTGCTGTTAATTTTACTTTTCTTGCC  
AAACAAAATAATTTGACATTGATTATGTGCTTTTTGATATTTTCAAGGGCAATTATTAAGGTTATGAGC  
TCTTCTTAGGGCACTTGATGCCTTATATGTTAATAGCAAGTGTGTCATATCATTTTAAAATAAACTAT  
TCAAAGGCTTTATTGTGTTTATTAAGCTTAATTTAAATTGGAATCTGTAATGCTGATTTGGTCTTTTAA  
ATTATATTTGAAATTATTTGTCCAAAAAATTAATGAATATTTACCCCTAA

>NM\_001190942.2 Homo sapiens TNF superfamily member 10 (TNFSF10), transcript variant 2, mRNA

GACCGGCTGCCTGGCTGACTTACAGCAGTCAGACTCTGACAGGATCATGGCTATGATGGAGGTCCAGGGG  
GGACCCAGCCTGGGACAGACCTGCGTGCTGATCGTGATCTTCACAGTGCTCCTGCAGTCTCTCTGTGTGG  
CTGTAACCTACGTGTACTTTACCAACGAGCTGAAGCAGATGCAGGACAAGTACTCCAAAAGTGGCATTGC  
TTGTTTCTTAAAGAAGATGACAGTTATTGGGACCCCAATGACGAAGAGAGTATGAACAGCCCCTGCTGG  
CAAGTCAAGTGGCAACTCCGTCAGCTCGTTAGAAAGACTCCAAGAATGAAAAGGCTCTGGGCCGCAAAAT  
AAACTCCTGGGAATCATCAAGGAGTGGGCATTATTCTGAGCAACTTGCACTTGAGGAATGGTGAAGT  
GTCATCCATGAAAAAGGGTTTTACTACATCTATTCCCAAACATACTTTCGATTTAGGAGGAAATAAAG  
AAACACAAAGAACGACAAACAAATGGTCCAATATATTTACAAATACACAAGTTATCCTGACCCTATATT  
GTTGATGAAAAGTGCTAGAAATAGTTGTTGGTCTAAAGATGCAGAATATGGACTCTATTCCATCTATCAA  
GGGGGAATATTTGAGCTTAAGGAAAATGACAGAATTTTGTCTGTAACAAATGAGCACTTGATAGACA

TGGACCATGAAGCCAGTTTTTTTGGGGCCTTTTTAGTTGGCTAACTGACCTGGAAAGAAAAAGCAATAAC  
CTCAAAGTGACTATTAGTTTTTCAGGATGATACACTATGAAGATGTTTCAAAAAATCTGACCAAAACAAA  
CAAACAGAAAACAGAAAACAAAAAACCTCTATGCAATCTGAGTAGAGCAGCCACAACCAAAAAATTCTA  
CAACACACACTGTTCTGAAAGTGACTCACTTATCCCAAGAGAATGAAATTGCTGAAAGATCTTTCAGGAC  
TCTACCTCATATCAGTTTGCTAGCAGAAATCTAGAAGACTGTCAGCTTCCAAACATTAATGCAATGGTTA  
ACATCTTCTGTCTTTATAATCTACTCCTTGTAAGACTGTAGAAGAAAGAGCAACAATCCATCTCTCAAG  
TAGTGTATCACAGTAGTAGCCTCCAGGTTTCCTTAAGGGACAACATCCTTAAGTCAAAAGAGAGAAGAGG  
CACCCTAAAAGATCGCAGTTTGCCTGGTGCAGTGGCTCACACCTGTAATCCCAACATTTTGGGAACCCA  
AGGTGGGTAGATCACGAGATCAAGAGATCAAGACCATAGTGACCAACATAGTGAAACCCCATCTCTACTG  
AAAGTACAAAAATTAGCTGGGTGTGTTGGCACATGCCTGTAGTCCCAGCTACTTGAGAGGCTGAGGCAAG  
AGAATTGTTTGAACCCGGGAGGCAGAGGTTGCAGTGTGGTGAGATCATGCCACTACACTCCAGCCTGGCG  
ACAGAGCGGAGACTTGGTTTCAAAAAAAAAAAAAAAAAAACTTCAGTAAGTACGTGTTATTTTTTCAAT  
AAAATTCTATTACAGTATGTCATGTTTGCTGTAGTGCTCATATTTATTGTTGTTTTGTTTAGTACTCA  
CTTGTTTCATAATATCAAGATTACTAAAAATGGGGGAAAAGACTTCTAATCTTTTTTTCATAATATCTTT  
GACACATATTACAGAAGAAATAAATTTCTTACTTTTAATTTAATATGA

>NM\_000546.6 Homo sapiens tumor protein p53 (TP53), transcript variant 1, mRNA

CTCAAAAGTCTAGAGCCACCGTCCAGGGAGCAGGTAGCTGCTGGGCTCCGGGGACACTTTGCGTTCGGGC  
TGGGAGCGTGCTTTCCACGACGGTGACACGCTTCCCTGGATTGGCAGCCAGACTGCCTTCCGGGTCACTG  
CCATGGAGGAGCCGCAGTCAGATCCTAGCGTCGAGCCCCCTCTGAGTCAGGAAACATTTTCAGACCTATG  
GAACTACTTCCTGAAAACAACGTTCTGTCCCCCTTGCCGTCCAAGCAATGGATGATTTGATGCTGTCC  
CCGGACGATATTGAACAATGGTTCACTGAAGACCCAGGTCCAGATGAAGCTCCCAGAATGCCAGAGGCTG  
CTCCCCCGTGGCCCCTGCACCAGCAGCTCTACACCGGCGGGCCCTGCACCAGCCCCCTCTGGCCCCCT  
GTCATCTTCTGTCCCTTCCAGAAAACCTACCAGGGCAGCTACGGTTTCCGTCTGGGCTTCTTGCAATCT

GGGACAGCCAAGTCTGTGACTTGACGTA TCCCCTGCCCTCAACAAGATGTTTTGCCAACTGGCCAAGA  
CCTGCCCTGTGCAGCTGTGGGTTGATTCCACACCCCCGCCCGCACCCGCGTCCGCGCCATGGCCATCTA  
CAAGCAGTCACAGCACATGACGGAGGTTGTGAGGCGCTGCCCCACCATGAGCGCTGCTCAGATAGCGAT  
GGTCTGGCCCCTCCTCAGCATCTTATCCGAGTGGAAGGAAATTTGCGTGTGGAGTATTTGGATGACAGAA  
ACACTTTTCGACATAGTGTGGTGGTGCCCTATGAGCCGCTGAGGTTGGCTCTGACTGTACCACCATCCA  
CTACAACTACATGTGTAACAGTTCCTGCATGGGCGGCATGAACCGGAGGCCCATCCTCACCATCATCACA  
CTGGAAGACTCCAGTGGTAATCTACTGGGACGGAACAGCTTTGAGGTGCGTGTTTGTGCCTGTCCTGGGA  
GAGACCGGCGCACAGAGGAAGAGAATCTCCGCAAGAAAGGGGAGCCTCACCACGAGCTGCCCCAGGGAG  
CACTAAGCGAGCACTGCCAACAACACCAGCTCCTCTCCCAGCCAAAGAAGAAACCACTGGATGGAGAA  
TATTTACCCCTTCAGATCCGTGGGCGTGAGCGCTTCGAGATGTTCCGAGAGCTGAATGAGGCCTTGGAAC  
TCAAGGATGCCAGGCTGGGAAGGAGCCAGGGGGGAGCAGGGCTCACTCCAGCCACCTGAAGTCCAAAAA  
GGGTCAGTCTACCTCCCGCCATAAAAACTCATGTTCAAGACAGAAGGGCCTGACTCAGACTGACATTCT  
CCACTTCTTGTTCCCACTGACAGCCTCCACCCCCATCTCTCCCTCCCCTGCCATTTTGGGTTTTGGGT  
CTTTGAACCCTTGCTTGCAATAGGTGTGCGTCAGAAGCACCCAGGACTTCCATTTGCTTTGTCCCGGGGC  
TCCACTGAACAAGTTGGCCTGCACTGGTGTTTTGTTGTGGGGAGGAGGATGGGGAGTAGGACATACCAGC  
TTAGATTTTAAGGTTTTTACTGTGAGGGATGTTTGGGAGATGTAAGAAATGTTCTTGCAGTTAAGGGTTA  
GTTTACAATCAGCCACATTCTAGGTAGGGGGCCACTTCACCGTACTAACCAGGGAAGCTGTCCCTCACTG  
TTGAATTTTCTCTAACTCAAGGCCATATCTGTGAAATGCTGGCATTGTCACCTACCTCACAGAGTGCA  
TTGTGAGGGTTAATGAAATAATGTACATCTGGCCTTGAAACCACCTTTTATTACATGGGGTCTAGAACTT  
GACCCCTTGAGGGTGCTTGTTCCCTCTCCCTGTTGGTCGGTGGGTGGTAGTTTCTACAGTTGGGCAGC  
TGTTAGGTAGAGGGAGTTGTCAAGTCTCTGCTGGCCCAGCCAAACCCTGTCTGACAACCTCTTGGTGAA  
CCTTAGTACCTAAAAGGAAATCTCACCCATCCCACACCCTGGAGGATTCATCTCTTGATATGATGAT  
CTGGATCCACCAAGACTTGTTTTATGCTCAGGGTCAATTTCTTTTTCTTTTTTTTTTTTTTTTTCTTT  
TTCTTTGAGACTGGGTCTCGCTTTGTTGCCAGGCTGGAGTGGAGTGGCGTGATCTTGGCTTACTGCAGC  
CTTGCCTCCCCGGCTCGAGCAGTCCTGCCTCAGCCTCCGGAGTAGCTGGGACCACAGGTTTCATGCCACC

ATGGCCAGCCAACTTTTGCATGTTTTGTAGAGATGGGGTCTCACAGTGTTGCCAGGCTGGTCTCAAAC  
CCTGGGCTCAGGCGATCCACCTGTCTCAGCCTCCAGAGTGCTGGGATTACAATTGTGAGCCACCACGTC  
CAGCTGGAAGGGTCAACATCTTTTACATTCTGCAAGCACATCTGCATTTTACCCACCCCTCCCTCCT  
TCTCCCTTTTATATCCCATTTTATATCGATCTCTTATTTTACAATAAACTTTGCTGCCA

>NM\_021202.3 Homo sapiens tumor protein p53 inducible nuclear protein 2 (TP53INP2), transcript  
variant 1, mRNA

GCACAGACTCAAAGCCCCGCGGGCGAGCTCAGCAGCCGGAGCGACCGCGGCCCCGCCGCTCCCCCGCG  
AGTCCCGGCGATGCGGCCCCGGCCTGTGAGCGGCGGCGACCTGGGACGCCCCGCCGACAACCTACCTCA  
ACGCCGTGCCGCCCCCTCCCGCCCCAGGGAATCTCTGGAGATTGGTTCACCTTTTGTGGTCCTGACCC  
CTTCTGTCCTCACTGTACCTTGAAGTCCTAGAGTCCAATAAAATCGCTGCCTCCAGCTGTTTGGATCAC  
AGAGAGGTTTTTGCAGTGCATAGGGCGCCCCGTGAGGCGCTTCGCCCCCACCATGTTCCAGCGCCTC  
TCCAGCCTCTTCTTCAGCACCCCCTCGCCCCCGAAGACCCGACTGCCCCCGCGCCTTCGTGTGCGAGG  
AGGATGAAGTGGACGGCTGGCTCATCATTGACCTGCCGGACAGCTACGCGGCTCCACCCAGCCCCGGGGC  
CGCCCCGCCCCGCGGGCCGCCCTCCGCCCGCGCCCTCCTTGATGGACGAGAGCTGGTTTGTACCCCT  
CCCGCCTGTTTACGGCAGAGGGGCTGGACTCGGTCCCGCCCGCCTCCAGAGCAGTCCCCTGGAGGACC  
TCCTCATCGAGACCCCAGCATGTCCGTTTACGTACCGGCAGCACCATAGTGCTAGAGCCCGGGTCCCC  
TTCCCCGCTCCCGGACGCGGCCCTGCCTGACGGCGACCTCAGCGAAGGGGAATTGACGCCCGCCCGCCGC  
GAGCCGCGGGCCGCGCGCCACGCCGCTCCTCTCCAGCGCGGGCGGCGCTGCTGGAGAAGGCGGGCCAGG  
TGCGGCGGCTGCAGCGGGCCCGGCGAGCGGGCAGAGCGCCACGCGCTGAGCGCCAAGGCGGTGCAGCGGCA  
GAACCGAGCCCGCGAGAGCCGTCCGCGCCGGTCCAAGAACCAGAGCAGCTTCATCTACCAGCCGTGCCAG  
CGCCAGTTCAACTACTGAGCGTCCACCGGCCGCGCCACGAACCCCTTGCCGATCCCGATCCCTGTCGGGC  
TCCTCCGACTCCTCGGGCTGGACACCGAAACCTCCCTTCTTAAAGCGTGTGAGGTTGGGTGATAGCCGTT  
CCTCCCCGACACCCTCAATTTCCCATCTCTGATCCTCTAATCTGCCTCTGAACCCATTACCCCTTCAC

CCTCACTCCTGGTCCCCATACCCAGCATCTAATCATCCATGCCCCCTACTCCTGGCCCCCTCCATCCTTTC  
TTCTCTGGTCCCCATCCCTGTCTCTCCCTTTCACCCCTTGCCCTCCAGTCCTCTACCTCTGGCCTGCCCCCT  
ATTTCTGAAAGCTTCTTCCAGTCCCTGATCTGGCTCATTCCCCACCTTCAACTCCCACCTTACATGTCTC  
ACACTATCCCATGGTTGGCATTACACTCACTCCTGTTCCCTTATTCTTCATTCCCAGTAATTCCCTACCA  
AATGGTGGGGACCCTGAGCCCAGCTCTGACCAGGTAGAGCCTGTGCAGCCTGGGCTGCTGTATTGCCCT  
CCAGTAAGGGCTCAGGGTTTTGCTTTTAGTCTCCCCTTCCTTCTGCCTTGGGGGCGGTACTCTGTGGAGC  
TGCTTAGGCCTGGAAAGGTACAGTATGTAGAAGAGGACTGTGAGACGTGAGTTAGAGGGAGAAGATGGAG  
GGAATCTAGGGAACGAGGCAGCCTATTGGAGATGCGGACAGGACAGACACGTTGAGAAGCTGCAGGGAGC  
AGGGCACCAAGGGAGTGTGCACTGTGCTTGCTCAGAGAGGCCAAACCCTGCTCCCAGGCTGAAGCCTGGA  
GTCTGCCCCCACTTCCCTTTTCTATAATCCACCCTTCTGCAGGCCCTGAAATCTGAAGGGCTTAGTTAGT  
ACCTTGCCACTCTACCCCCAACACGTCACCCGAGTAGAAGCTGGGCAAGGCCCTACCATCCTGGCCGTCT  
GTTACAAGCCCAAGGTGCTAGAACTAGCTTAGGAGACATGCAGGCCACAGGGCTTCTAGGCAGGGAAAG  
GGCACACACCCTAGGTCAGCGTGCAGAGCAGTGATGCTGGAGGACACACCATGGGGTGAAGCCATCCCAA  
GGCTGACAGCTCAGTCTTCACCTTGCTCTGGCCTTGATTTTACACCCTGCTCAGTATGGCTAGCCAGC  
AGTCCTGAGTAGGAGTCCAGGACTCCCACTGTCTCAATCTGCAAATTGTTCTATCCAGGTTTCAGGGCCT  
TCAGGGGGCCTCTTTTCATTTTCTCCACAGGCCTCTCTTTCTTTCTAGGTTGCTGGGGAGAAATGGGTA  
CCCTATGATCCCCCTCCCCTTCTCCTCCAGTAAATACCTGGAAGAGGGAACTGAATCCCTGGGGGAGAC  
AGAAGGGGCAGGGGCCACCAGCCTCCCCTTCTTGTTGGTGAGACTGAATTTTGGGCTCAGACACCAGCAAC  
AGCCTCTTGGGATGCCCTGAGTTGCTTCCATTTCTCTTTCTAGCCGTCCTTTTCTAGTGTGTGCTCAC  
TCTTCTAGGAACTTTTAAGACTTCTTGGTACCTATGAACATAGGTCCTCCCCTCACCCCACTCTAGGT  
TTCCAGGCCTCACAGCCAAGCTGAAGCTTGAGAGAAAACCTCTGCATTCCCATGAGGGCAAAGGCAGCTGCC  
CTCCCTGACCCTATAGCCCCAGGCCTCATGGGGGGTATGTGGGGAAGGGATGGGGTATCCCCATGGATGC  
TGGGATGAGGACAGAGGAAGACCTGATGGGGTCTCCTATTCCAGGGAATAAGCCAAATTAACACTAAAAA  
CGGATCAAAGCTCCCACGCCAGTCCACTAGGGCCCCAGTAGTTGACAGCCTTGCTCCTCTCCCAAGTTCT  
CCTCAGAACCTAGTTGCTTTTATTCTTCCAGCTACCACTTGGGCACTTCACAGCCAGCCTAGGGTCTTC

GGCACCTCCAAGAGCTGAATCTCCCTCCAACCCTTCTTGCCTACTCCTCACTGCCAGCTGGGACCTAGGC  
TCAGTCCTGTGTGGTGCCCATGATCCTTCTGGTGGGGGAAGAGTTTAAGTTATAGGGCATTGGCTCAAA  
TTTTAAAAGGCCTTTTGTACCTATATTCTGGAGGCTCCTGTATTCTAGAACCAATCTCTCACCTGC  
TTGGTTGCAAGGCTCATATTTTTTGTACCTTCTATAGATTCTGTAGCATTGAGTGTGGCAATATT  
TAATTGTGTATAGATTCTAAGAACCAACTACTCAGTCTCCTGCTAGTCTGACTCCTGAAGCATCAGC  
CCTTGTCACTGTATTGACTGTGTACGTGCCTTTCACCTTGAGCATGCTTCAGGATTTTTTTTAAACC  
ACAGAACTGAATACATGAGGGAACCAGAGTTCAAAGTCCTATGCAACCTTAGGAGGGGGTTAGAGAGTC  
TGTTTTGATTGATGTTTTCTGAGGCCCTAGAGGAGTTGTATCAATTTGTGAGTATTAATGTCAGTACTA  
CCAGCACTTTGCCAAAAGTGTGAGAGGGACCCGTTTCTAGAGTGAGTCCCAGTTACATCAAACAGTGACT  
TCCAGTTATCCCCAGTAAGTCTGAGTGGTTCCTTCAAGCTGGGTGTCTTCCAGCCTTTGCCAGTCTAG  
CCCCAGCAGGGCACCGTGTATGAATGCAGTTTGGTGCTGTTTTAGAGTATGCCTGCTCCCCAGCCCCCTG  
CCTGGAACCTCTGAGCAACTTGCTCTGACCTATAATGTCTTAGGTGCAACACGGACCCACCAGAGCTC  
TTGGATACCCCCCTAGATCCATGTGGCTTTATGTGAGGGGACTGAATGCAGACACACCATAGCCCCCTTC  
TACTACTTTCCTCTCGCCCTGCCACCTAGTTCACATGGAACCAACAAGTTGAGTGCATCCCTGTTGGG  
TGTTTTGTGTTGAGACTGGCTGAAATGAGGAGACTTTGACCATGTGACGTGTCAACAGACTCAAGGAGAC  
AACCACCTCAACTGGGTCATGTGGCATGCCTGTGTATGTGTGTAACAGAATTCTGATTGTTAGACTGTAA  
TGCTATTCCTCTATGGGAGAAAAAATTAATATAAAGAAAAACAAATAAAAATATATTTAAAGCACA

>NM\_003722.5 Homo sapiens tumor protein p63 (TP63), transcript variant 1, mRNA

CTATGTCTGATAGCATTGACCCTATTGCTTTTAGCCTCCCGGCTTTATATCTATATATACACAGGTATA  
TGTGTATATTTATATAATTGTTCTCCGTTGTTGATATCAAAGACAGTTGAAGGAAATGAATTTGAAA  
CTTCACGGTGTGCCACCCTACAGTACTGCCCTGACCCTTACATCCAGCGTTTCGTAGAAACCCAGCTCA  
TTTCTCTTGAAAGAAAGTTATTACCGATCCACCATGTCCAGAGCACACAGACAAATGAATTCCTCAGT

CCAGAGGTTTTCCAGCATATCTGGGATTTTCTGGAACAGCCTATATGTTTCAGTTCAGCCCATTGACTTGA  
ACTTTGTGGATGAACCATCAGAAGATGGTGCGACAAACAAGATTGAGATTAGCATGGACTGTATCCGCAT  
GCAGGACTCGGACCTGAGTGACCCCATGTGGCCACAGTACACGAACCTGGGGCTCCTGAACAGCATGGAC  
CAGCAGATTCAGAACGGCTCCTCGTCCACCAGTCCCTATAACACAGACCACGCGCAGAACAGCGTCACGG  
CGCCCTCGCCCTACGCACAGCCCAGCTCCACCTTCGATGCTCTCTCTCCATCACCCGCCATCCCCTCAA  
CACCGACTACCCAGGCCCGCACAGTTTCGACGTGTCCTTCCAGCAGTCGAGCACCGCCAAGTCGGCCACC  
TGGACGTATTCCACTGAACTGAAGAACTCTACTGCCAAATTGCAAAGACATGCCCCATCCAGATCAAGG  
TGATGACCCACCTCCTCAGGGAGCTGTTATCCGCGCCATGCCTGTCTACAAAAAAGCTGAGCACGTAC  
GGAGGTGGTGAAGCGGTGCCCCAACCATGAGCTGAGCCGTGAATTCAACGAGGGACAGATTGCCCTCCT  
AGTCATTTGATTGAGTAGAGGGGAACAGCCATGCCCAGTATGTAGAAGATCCCATCACAGGAAGACAGA  
GTGTGCTGGTACCTTATGAGCCACCCAGGTTGGCACTGAATTCACGACAGTCTTGTACAATTCATGTG  
TAACAGCAGTTGTGTTGGAGGGATGAACCGCCGTCCAATTTTAATCATTGTTACTCTGGAAACCAGAGAT  
GGGCAAGTCCTGGGCCGACGCTGCTTTGAGGCCCGGATCTGTGCTTGCCCAGGAAGAGACAGGAAGGCGG  
ATGAAGATAGCATCAGAAAGCAGCAAGTTTCGGACAGTACAAAGAACGGTGATGGTACGAAGCGCCCGTT  
TCGTCAGAACACACATGGTATCCAGATGACATCCATCAAGAAACGAAGATCCCCAGATGATGAACTGTTA  
TACTTACCAGTGAGGGGCCGTGAGACTTATGAAATGCTGTTGAAGATCAAAGAGTCCCTGGAACTCATGC  
AGTACCTTCCTCAGCACACAATTGAAACGTACAGGCAACAGCAACAGCAGCAGCACCAGCACTTACTTCA  
GAAACAGACCTCAATACAGTCTCCATCTTCATATGGTAACAGCTCCCCACCTCTGAACAAAATGAACAGC  
ATGAACAAGCTGCCTTCTGTGAGCCAGCTTATCAACCCTCAGCAGCGCAACGCCCTCACTCCTACAACCA  
TTCCTGATGGCATGGGAGCCAACATTCCCATGATGGGCACCCACATGCCAATGGCTGGAGACATGAATGG  
ACTCAGCCCCACCCAGGCACTCCCTCCCCACTCTCCATGCCATCCACCTCCCACTGCACACCCCCACCT  
CCGTATCCCACAGATTGCAGCATTGTGAGTTTCTTAGCGAGGTTGGGCTGTTTCATCATGTCTGGACTATT  
TCACGACCCAGGGGCTGACCACCATCTATCAGATTGAGCATTACTCCATGGATGATCTGGCAAGTCTGAA  
AATCCCTGAGCAATTCGACATGCGATCTGGAAGGGCATCCTGGACCACCGGCAGCTCCACGAATTCTCC  
TCCCCTTCTCATCTCCTGCGGACCCCAAGCAGTGCCTCTACAGTCAGTGTGGGCTCCAGTGAGACCCGGG

GTGAGCGTGTTATTGATGCTGTGCGATTACCCTCCGCCAGACCATCTCTTTCCACCCCGAGATGAGTG  
GAATGACTTCAACTTTGACATGGATGCTCGCCGCAATAAGCAACAGCGCATCAAAGAGGAGGGGGAGTGA  
GCCTCACCATGTGAGCTCTTCCTATCCCTCTCCTAACTGCCAGCCCCCTAAAAGCACTCCTGCTTAATCT  
TCAAAGCCTTCTCCCTAGCTCCTCCCTCCTCTTGCTGATTTCTTAGGGGAAGGAGAAGTAAGAGGCT  
ACCTCTTACCTAACATCTGACCTGGCATCTAATTCTGATTCTGGCTTTAAGCCTTCAAACTATAGCTTG  
CAGAACTGTAGCTGCCATGGCTAGGTAGAAGTGAGCAAAAAGAGTTGGGTGTCTCCTTAAGCTGCAGAG  
ATTTCTCATTGACTTTTATAAAGCATGTTACCCTTATAGTCTAAGACTATATATATAAATGTATAAATA  
TACAGTATAGATTTTTGGGTGGGGGGCATTGAGTATTGTTAAAATGTAATTTAAATGAAAGAAAATTGA  
GTTGCACTTATTGACCATTTTTAATTTACTTGTTTTGGATGGCTTGTCTATACTCCTTCCCTTAAGGGG  
TATCATGTATGGTGATAGGTATCTAGAGCTTAATGCTACATGTGAGTGACGATGATGTACAGATTCTTTC  
AGTTCTTTGGATTCTAAATACATGCCACATCAAACCTTTGAGTAGATCCATTTCCATTGCTTATTATGTA  
GGTAAGACTGTAGATATGTATTCTTTCTCAGTGTTGGTATATTTTATATTACTGACATTTCTTCTAGTG  
ATGATGGTTCACGTTGGGGTGATTTAATCCAGTTATAAGAAGAAGTTCATGTCCAAACGTCCTCTTAGT  
TTTTGGTTGGGAATGAGGAAAATTCTTAAAAGGCCCATAGCAGCCAGTTCAAAAACACCCGACGTCATGT  
ATTTGAGCATATCAGTAACCCCTTAAATTTAATACCAGATACCTTATCTTACAATATTGATTGGGAAAA  
CATTTGCTGCCATTACAGAGGTATTA AAACTAAATTTCACTACTAGATTGACTAACTCAAATACACATTT  
GCTACTGTTGTAAGAATTCTGATTGATTTGATTGGGATGAATGCCATCTATCTAGTTCTAACAGTGAAGT  
TTTACTGTCTATTAATATTCAGGGTAAATAGGAATCATTAGAAATGTTGAGTCTGTACTAAACAGTAAG  
ATATCTCAATGAACCATAAATTCAACTTTGTAAAAATCTTTTGAAGCATAGATAATATTGTTTGGTAAAT  
GTTTCTTTTGTGTTGGTAAATGTTTCTTTTAAAGACCCTCCTATTCTATAAACTCTGCATGTAGAGGCTT  
GTTTACCTTTCTCTCTCTAAGGTTTACAATAGGAGTGGTGATTTGAAAAATATAAAATTATGAGATTGGT  
TTTCTGTGGCATAAATTGCATCACTGTATCATTTTCTTTTTTAACCGGTAAGAGTTTCAGTTTGTGGA  
AAGTAACTGTGAGAACCCAGTTTCCCGTCCATCTCCCTTAGGGACTACCCATAGACATGAAAGGTCCCCA  
CAGAGCAAGAGATAAGTCTTTCATGGCTGCTGTTGCTTAAACCACTTAAACGAAGAGTTCCCTTGAACT  
TTGGGAAAACATGTTAATGACAATATTCCAGATCTTTCAGAAATATAACACATTTTTTTGCATGCATGCA

AATGAGCTCTGAAATCTCCCATGCATTCTGGTCAAGGGCTGTCATTGCACATAAGCTTCCATTTTAATT  
TTAAAGTGCAAAAGGGCCAGCGTGGCTCTAAAAGGTAATGTGTGGATTGCCTCTGAAAAGTGTGTATATA  
TTTTGTGTGAAATTGCATACTTTGTATTTTGATTATTTTTTTTTCTTCTGGGATAGTGGGATTTCCAG  
AACCACACTTGAAACCTTTTTTATCGTTTTGTATTTTCATGAAAATACCATTTAGTAAGAATACCACA  
TCAAATAAGAAATAATGCTACAATTTAAGAGGGGAGGGAAGGGAAAGTTTTTTTTATTATTTTTTAA  
AATTTTGTATGTTAAAGAGAATGAGTCCTTGATTTCAAAGTTTTGTTGTACTTAAATGGTAATAAGCACT  
GTAAACTTCTGCAACAAGCATGCAGCTTGTCAAACCCATTAAGGGGAAGAATGAAAGCTGTTCTTGCTC  
CTAGTAAGAAGACAACTGCTTCCCTTACTTTGCTGAGGGTTTGAATAAACCTAGGACTTCCGAGCTATG  
TCAGTACTATTCAGGTAACACTAGGGCCTTGAAATTCCTGTACTGTGTCTCATGGATTTGGCACTAGCC  
AAAGCGAGGCACCCTTACTGGCTTACCTCCTCATGGCAGCCTACTCTCCTTGAGTGTATGAGTAGCCAGG  
GTAAGGGGTAAAAGGATAGTAAGCATAGAAACCACTAGAAAGTGGGCTTAATGGAGTTCTTGTGGCCTCA  
GCTCAATGCAGTTAGCTGAAGAATTGAAAAGTTTTTGTGGAGACGTTTATAAACAGAAATGGAAAGCA  
GAGTTTTCATTAATCCTTTTACCTTTTTTTTTCTTGGTAATCCCCTAAAATAACAGTATGTGGGATAT  
TGAATGTTAAAGGGATATTTTTTTCTATTATTTTATAATTGTACAAAATTAAGCAAATGTTAAAAGTTT  
TATATGCTTTATTAATGTTTTCAAAGGTATTATACATGTGATACATTTTTTAAGCTTCAGTTGCTTGTC  
TTCTGGTACTTTCTGTTATGGGCTTTTGGGGAGCCAGAAGCCAATCTACAATCTCTTTTTGTTTGCCAGG  
ACATGCAATAAAATTTAAAAAATAAATAAAAACTAATTAAGAAA

>NM\_005427.4 Homo sapiens tumor protein p73 (TP73), transcript variant 1, mRNA

GCCCTGCCTCCCCGCCCGCGCACCCGCCGGAGGCTCGCGCGCCCGCAAGGGGACGCAGCGAAACCGGG  
GCCCGCGCCAGGCCAGCCGGGACGGACGCCGATGCCCGGGGCTGCGACGGCTGCAGAGCGAGCTGCCCTC  
GGAGGCCGGCGTGGGGAAGATGGCCAGTCCACCGCCACCTCCCCTGATGGGGGCACCACGTTTGAGCAC  
CTCTGGAGCTCTCTGGAACCAGACAGCACCTACTTCGACCTCCCCAGTCAAGCCGGGGGAATAATGAGG

TGGTGGGCGGAACGGATTCCAGCATGGACGTCTCCACCTGGAGGGCATGACTACATCTGTCATGGCCCA  
GTTCAATCTGCTGAGCAGCACCATGGACCAGATGAGCAGCCGCGCGGCCTCGGCCAGCCCCTACACCCCA  
GAGCACGCCGCCAGCGTGCCACCCACTCGCCCTACGCACAACCCAGCTCCACCTTCGACACCATGTCGC  
CGGCGCCTGTCATCCCCTCCAACACCGACTACCCCGACCCCACTTTGAGGTCACTTTCCAGCAGTC  
CAGCACGGCCAAGTCAGCCACCTGGACGTACTCCCCGCTCTTGAAGAACTCTACTGCCAGATCGCCAAG  
ACATGCCCCATCCAGATCAAGGTGTCCACCCCGCCACCCCAAGGCACCGCCATCCGGGGCCATGCCTGTTT  
ACAAGAAAGCGGAGCACGTGACCGACGTCGTGAAACGCTGCCCCAACCACGAGCTCGGGAGGGACTTCAA  
CGAAGGACAGTCTGCTCCAGCCAGCCACCTCATCCGCGTGGAAGGCAATAATCTCTCGCAGTATGTGGAT  
GACCCTGTACCGGCAGGCAGAGCGTCGTGGTGCCCTATGAGCCACCACAGGTGGGGACGGAATTCACCA  
CCATCCTGTACAACCTTCATGTGTAACAGCAGCTGTGTAGGGGGCATGAACCGGCGGCCCATCCTCATCAT  
CATCACCTGGAGATGCGGGATGGGCAGGTGCTGGGCCGCCGGTCCTTTGAGGGCCGCATCTGCGCCTGT  
CCTGGCCGCGACCGAAAAGCTGATGAGGACCACTACCGGGAGCAGCAGGCCCTGAACGAGAGCTCCGCCA  
AGAACGGGGCCGCCAGCAAGCGTGCCTTCAAGCAGAGCCCCCTGCCGTCCCCGCCCTTGGTGCCGGTGT  
GAAGAAGCGGCGGCATGGAGACGAGGACACGTACTACCTTCAGGTGCGAGGCCGGGAGAACTTTGAGATC  
CTGATGAAGCTGAAAGAGAGCCTGGAGCTGATGGAGTTGGTGCCGCAGCCACTGGTGGACTCCTATCGGC  
AGCAGCAGCAGCTCCTACAGAGGCCGAGTCACCTACAGCCCCGTCTACGGGCCGGTCCTCTCGCCCAT  
GAACAAGGTGCACGGGGGCATGAACAAGCTGCCCTCCGTCAACCAGCTGGTGGGCCAGCCTCCCCGCAC  
AGTTCGGCAGCTACACCAACCTGGGGCCCGTGGGCCCGGGATGCTCAACAACCATGGCCACGCAGTGC  
CAGCCAACGGCGAGATGAGCAGCAGCCACAGCGCCAGTCCATGGTCTCGGGGTCCCACTGCACTCCGCC  
ACCCCCCTACCACGCCGACCCAGCCTCGTCAGTTTTTTAACAGGATTGGGGTGTCCAAACTGCATCGAG  
TATTTACCTCCCAAGGGTTACAGAGCATTTACCACCTGCAGAACCTGACCATTGAGGACCTGGGGGCCC  
TGAAGATCCCCGAGCAGTACCGCATGACCATCTGGCGGGGCCTGCAGGACCTGAAGCAGGGCCACGACTA  
CAGCACCGCGCAGCAGCTGCTCCGCTCTAGCAACGCGGCCACCATCTCCATCGGCGGCTCAGGGGAACTG  
CAGCGCCAGCGGGTCATGGAGGCCGTGCACTTCCGCGTGCGCCACACCATCACCATCCCCAACCGCGGCG  
GCCAGGCGGCGGCCCTGACGAGTGGGCGGACTTCGGCTTCGACCTGCCCCACTGCAAGGCCCGCAAGCA

GCCCATCAAGGAGGAGTTCACGGAGGCCGAGATCCACTGAGGGCCTCGCCTGGCTGCAGCCTGCGCCACC  
GCCCAGAGACCCAAGCTGCCTCCCCTCTCCTTCTGTGTGTCCAAAAGTGCCTCAGGAGGCAGGACCTTC  
GGGCTGTGCCCCGGGGAAAGGCAAGGTCCGGCCCATCCCCAGGCACCTCACAGGCCCCAGGAAAGGCCAG  
CCACCGAAGCCGCTGTGGACAGCCTGAGTCACCTGCAGAACCTTCTGGAGCTGCCCTAGTGCTGGGCTT  
GTGGGGCGGGGGCTGGCCCACTCTCAGCCCTGCCACTGCCCCGGCGTGCTCCATGGCAGGCGTGGGTGGG  
GACCGCAGCGTCGGCTCCGACTTCAGGCTTCATCCTAGAGACTGTCATCTCCCAACCAGGCGAGGTCTT  
TCCAAAGGAAAGGATCCTCTTTGCTGATGGACTGCCAAAAGTATTTTGCACATCTTTTGTTCTGGAT  
AGTAGTGAGCAGCCAAGTGACTGTGTCTGAAACACCAAGTGATTTTTCAGGGAATGTCCCTAACTGCGTCT  
TGCCCGCGCCGGGGGCTGGGGACTCTCTCTGCTGGACTTGGGACTGGCCTCTGCCCCAGCACGCTGTAT  
TCTGCAGGACCGCCTCCTTCCTGCCCCAACAACAACCACAGTGTTGCTGAAATTGGAGAAAAGTGGGGA  
GGGCGCAACCCCCCCCAGGCGCGGGGAAGCATGTGGTACCGCCTCAGCCAGTGCCCTCAGCCTGGCCAC  
AGTCGCCTCTCCTCGGGGACCCCTCAGCAGAAAGGGACAGCCTGTCCTTAGAGGACTGGAAATTGTCAAT  
ATTTGATAAAATGATACCCTTTTCTACATGGTGGGTGAGCTTTTTTTTTTTTTTTTTTAACCTTCTTTCT  
CAGCATTCTCTTTGGAGTTCAACCTAGCGCCCATGAGCCAGGCTGAGGAAGCTGAGTGAGAAGCCAGGTG  
GGCGGGACTTGTTCCCAGGAAGGCCGGGTGGGGAGGAAGCCTAGAGGGAACCCCAGGAAGGGCAAATCCA  
GGCAAATCTGCAGGAATGCTCTGCCATGGGAGCAGCTCCTCCCTTGCCACGGCCACCTTCTCTAGCACTG  
CAAGGTCCACAGGGCATTGCTTTCCTTTCTAGGCGGTGGCAGTCAGGGAACAGACTGAGGTAGGTGTAGG  
GGGGTCTAGGCCTTCGTGGAGCACCCCAGGGAGTTAGTAGGCCCGGGGAGACAGAGTCTGCACAGGCC  
TTTCTGGGGCCACCTCCATCCACGAGGAGCAGCCTGAGCCTTGGTGGCCGAACCTTGACCGTCCCGGAGC  
ACAGCTTCAGGGCAGGGAACCGGAGCCCCTGGGGGGCCTCACGGGTGTGACGAGGCCCTTCATTGCAGGC  
AGGTGGGCCAATGGGAGCCCTCACCCACGCAAGCCGAGACACCACCCAGAGTGCAGGCTGCCTGGCCCCCT  
TCTGGCACGGCCAGCTCCACACCCCCTGCCTAGGGTATGTGTGGTCCTAAGGGCTAGGAGCTTCCCCTAC  
TAACATCTCCCAGAAAAAGCAGTTAAGCCCCTCAGGGCACAGCAAGGTTAGACACAGCCCCCATCCCCAG  
ATCAGGACTCCATCTTGCTAAGTGGCATCACCGTCACCAGCCTCCCCTTATTTAAAAGCAGCGACTGGTG  
TTGCCGAGGTACCTGGTCTACGAAGACGCAGGCATCCCTCTCCACCGTCCACCTCCCCGGGGGGCGCT

GACAGCACAGTCGCCTGGGTGCACGCTTGTGGGGGCAGCAGGAACGGGGCTGTCGGCTCTCAGGGGATCT  
GGCTGCAGCCAGGGCGAGGGCCTGGCCCTTCCTTCCAGCTCCTTCCGGCTCCTTCCAGCTGAAGGGCAGG  
AAGCTCTGGCCGCTTAGCTTCTAGGGTTCATCTCCCTAGAAAGGTGCCCACGCCCAGGGCATCAGTCAG  
TAGCGGCAGCAGCAGCAGACTCGGGGCTTCCAGGGTGGCGCAGCCACCCAGCTGCATGTCACCTCAG  
CTCTCCATCTTATTGCCATTTTGTAGATGAGGAAGCTGAGACCAGAAAGGCTAAGACCCATGCCCCAGGC  
ACCACACCCATCTCTTGGGGGCTGGGCACCTGCTACCCGAGGCCACCTCCTGAAGCCCCCACTCTTCCCC  
CATGTTCCACTTCAGGAGCCGCGGGGGGCCATCCTGACACCCGGGGTTCCTCAGCCCAGCGCAGATGTGC  
TTCAGTTCAGAGGGCTTGTTGATTTGTTTCTTAGGTACGTTACCTGTCCACCCTGAGTCCAGTGAGGCT  
GTCCAAGAGCCCCTGTAGTGTGCTCCTGGGAAGGGCTGGGGGGGCTGGGGGGGCTGGGAGAGGCCCAGG  
GGCAGCTGTCACTGGAACCCAGCCAGATGTCCAAGGAAGCCGGCCAGAACACGGAGCAGCCAGATGGCC  
CCAGCTGCACCTGTCTAGGGAGCCCATGCAGCCTCCTTGCACTGGAGAAGCAGCTGTGAAAGTAGACAGA  
GTTGAGACTTCGCCGTGGTCAGGAGAAAATGCAAATCCCAGGAACAAGAATCCTTTAAGTGATATGTTT  
TTATAAACTAAACAAATCAACAAATAAATCTTGAAGGCGGATGGTTTTCCAGCAGTGCAGGGGTTGGA  
GGGAGGCTGCTGGCACTCCTGGGGCCAAGGGGGACAGGCAGTGGTCCTGAGTCTGCTCAGAGAGGCAAGG  
CAGAAGGAGCTCGCCAGGCAGGTCAGCTCACATCTGTCCAAGTCGCTCTGGTCAGAAACAGCGACTCTCC  
CCCATCCCCCAGCGTTCCACAGGCCTGGGCTGCTGGGAAGCCCTTGCTGTACCCAGGAGCCCGACCC  
GCAGTATCCTGGCACAGAGCCACTTGTCACTCAGAACAGTCAGTGTCTCCAACGCACAAACATCCACTCC  
TCTGTTACCAGTTAAAGCACTTTAATGCTTTAAGGTGAAAACGAAATCCCATCCGTGTTTTTCGTGTAAG  
ATCGTGCTTCTCCGAGCAGTATTAATGGACGCCCTCCAATGACATAACAACCTGTTTTTGGAATGTAATC  
TTGGGAAAATGTGTTATTTTTTTAGCTGTGTTTCAGTGGGGATTTTTGTTTTTGTAACATAATAAAGTGT  
ATGTTCCAATGA

>NM\_000368.5 Homo sapiens TSC complex subunit 1 (TSC1), transcript variant 1, mRNA

GTACGTCCAAGATGGCGGCGCCCTGTAGGCTGGAGGGACTGTGAGGTAAACAGCTGAGGGGGAGGAGACG  
GTGGTGACCATGAAAGACACCAGGTTGACAGCACTGGAACTGAAGTACCAGTTGTCGCTAGAACAGTTT  
GGTAGTGGCCCCAATGAAGAACCTTCAGAACCTGTAGCACACGTCCTGGAGCCAGCACAGCGCCTTCGAG  
CGAGAGAATGGCCCAACAAGCAAATGTCGGGGAGCTTCTTGCCATGCTGGACTCCCCATGCTGGGTGTG  
CGGGACGACGTGACAGCTGTCTTTAAAGAGAACCTCAATTCTGACCGTGGCCCTATGCTTGTAACACCT  
TGGTGGATTATTACCTGGAAACCAGCTCTCAGCCGGCATTGCACATCCTGACCACCTTGCAAGAGCCACA  
TGACAAGCACCTCTTGACAGGATTAACGAATATGTGGGCAAAGCCGCCACTCGTTTATCCATCCTCTCG  
TACTGGGTCATGTCATAAGACTGCAGCCATCTTGGAAGCATAAGCTCTCTCAAGCACCTCTTTTGCCTT  
CTTTACTAAAATGTCTCAAGATGGACACTGACGTCGTTGTCCTCACAACAGGCGTCTTGGTGTTGATAAC  
CATGCTACCAATGATTCCACAGTCTGGGAAACAGCATCTTCTTGATTTCTTGACATTTTGGCCGTCTG  
TCATCATGGTGCCTGAAGAAACCAGGCCACGTGGCGGAAGTCTATCTCGTCCATCTCCATGCCAGTGTGT  
ACGCACTCTTTCATCGCCTTTATGGAATGTACCCTTGCAACTTCGTCTCCTTTTTGCGTTCTCATTACAG  
TATGAAAGAAAACCTGGAGACTTTTGAAGAAGTGGTCAAGCCAATGATGGAGCATGTGCGAATTCATCCG  
GAATTAGTGACTGGATCCAAGGACCATGAACTGGACCCTCGAAGGTGGAAGAGATTAGAACTCATGATG  
TTGTGATCGAGTGTGCCAAAATCTCTCTGGATCCACAGAAGCCTCATATGAAGATGGCTATTCTGTGTC  
TCACCAAATCTCAGCCCGCTTTCCTCATCGTTCAGCCGATGTCACCACCAGCCCTTATGCTGACACACAG  
AATAGCTATGGGTGTGCTACTTCTACCCCTTACTCCACGTCTCGGCTGATGTTGTTAAATATGCCAGGGC  
AGCTACCTCAGACTCTGAGTTCATCGACACGGCTGATAACTGAACCACCACAAGCTACTCTTTGGAG  
CCCATCTATGGTTTGTGGTATGACCACTCCTCCAATTCTCCTGGAAATGTCCACCTGATCTGTCACAC  
CCTTACAGTAAAGTCTTTGGTACAACCTGCAGGTGGAAAAGGAACTCCTCTGGGAACCCAGCAACCTCTC  
CTCCTCCAGCCCCACTCTGTCAATTCGGATGACTACGTGCACATTTCACTCCCCAGGCCACAGTCACACC  
CCCCAGGAAGGAAGAGAGAATGGATTCTGCAAGACCATGTCTACACAGACAACACCATCTTCTGAATGAC  
AGAGGATCAGAAGAGCCACCTGGCAGCAAAGGTTCTGTCACTCTAAGTGATCTTCCAGGGTTTTTAGGTG  
ATCTGGCCTCTGAAGAAGATAGTATTGAAAAAGATAAAGAAGAAGCTGCAATATCTAGAGAACTTTCTGA  
GATCACCACAGCAGAGGCAGAGCCTGTGGTTCCTCGAGGAGGCTTTGACTCTCCCTTTTACCGAGACAGT

CTCCCAGGTTCTCAGCGGAAGACCCACTCGGCAGCCTCCAGTTCTCAGGGCGCCAGCGTGAACCCTGAGC  
CTTTACACTCCTCCCTGGACAAGCTTGGGCCTGACACACCAAAGCAAGCCTTTACTCCCATAGACCTGCC  
CTGCGGCAGTGCTGATGAAAGCCCTGCGGGAGACAGGGAATGCCAGACTTCTTTGGAGACCAGTATCTTC  
ACTCCCAGTCCTTGTAATAATTCCACCTCCGACGAGAGTGGGCTTTGGAAGCGGGCAGCCTCCCCGTATG  
ATCATCTTTTTGAGGTGGCATTGCCAAAGACAGCCCATCATTTTGTATCAGGAAGACTGAGGAGCTGTT  
AAAGAAAGCAAAAGGAAACACAGAGGAAGATGGTGTGCCCTCTACCTCCCCAATGGAAGTGCTGGACAGA  
CTGATACAGCAGGGAGCAGACGCGCACAGCAAGGAGCTGAACAAGTTGCCTTTACCCAGCAAGTCTGTGC  
ACTGGACCCACTTTGGAGGCTCTCCTCCTTCAGATGAGATCCGCACCCTCCGAGACCAGTTGCTTTTACT  
GCACAACCAGTTACTCTATGAGCGTTTTAAGAGGCAGCAGCATGCCCTCCGGAACAGGCGGCTCCTCCGC  
AAGGTGATCAAAGCAGCAGCTCTGGAGGAACATAATGCTGCCATGAAAGATCAGTTGAAGTTACAAGAGA  
AGGACATCCAGATGTGGAAGGTTAGTCTGCAGAAAGAACAAGCTAGATACAATCAGCTCCAGGAGCAGCG  
TGACACTATGGTAACCAAGCTCCACAGCCAGATCAGACAGCTGCAGCATGACCGAGAGGAATTCTACAAC  
CAGAGCCAGGAATTACAGACGAAGCTGGAGGACTGCAGGAACATGATTGCGGAGCTGCGGATAGAACTGA  
AGAAGGCCAACAAACAAGGTGTGTCACTGAGCTGCTGCTCAGTCAGGTTTCCAAAAGCTCTCAACAG  
TGAGTCGGTCCAGCAGCAGATGGAGTTCTTGAACAGGCAGCTGTTGGTTCTTGGGGAGGTCAACGAGCTC  
TATTTGGAACAACTGCAGAACAAAGCACTCAGATACCACAAAGGAAGTAGAAATGATGAAAGCCGCCTATC  
GGAAAGAGCTAGAAAAAACAGAAGCCATGTTCTCCAGCAGACTCAGAGGCTTGATACCTCCAAAAACG  
GATTTTGGAAGTGAATCTCACCTGGCCAAGAAAGACCACCTTCTTTTGAACAGAAGAAATATCTAGAG  
GATGTCAAACCTCCAGGCAAGAGGACAGCTGCAGGCCGCAGAGAGCAGGTATGAGGCTCAGAAAAGGATAA  
CCCAGGTGTTTGAATTGGAGATCTTAGATTTATATGGCAGGTTGGAGAAAGATGGCCTCCTGAAAAAAT  
TGAAGAAGAAAAAGCAGAAGCAGCTGAAGCAGCAGAAGAAAGGCTTGACTGTTGTAATGACGGGTGCTCA  
GATTCCATGGTAGGGCACAATGAAGAGGCATCTGGCCACAACGGTGAGACCAAGACCCCCAGGCCAGCA  
GCGCCCGGGGCAGTAGTGGAAGCAGAGGTGGTGGAGGCAGCAGCAGCAGCAGCAGCGAGCTTTCTACCCC  
AGAGAAACCCCCACACCAGAGGGCAGGCCATTTCAGCAGTCGGTGGGAGACGACTATGGGAGAAGCGTCT  
GCCAGCATCCCCACCACTGTGGGCTCACTTCCCAGTTCAAAAAGCTTCTGGGTATGAAGGCTCGAGAGT

TATTCGTAATAAGAGCGAGAGCCAGTGTGATGAGGACGGCATGACCAGTAGCCTTTCTGAGAGCCTAAA  
GACAGAACTGGGCAAAGACTTGGGTGTGGAAGCCAAGATTCCCCTGAACCTAGATGGCCCTCACCCGTCT  
CCCCGACCCCGACAGTGTTGGACAGCTACATATCATGGACTACAATGAGACTCATCATGAACACAGCT  
AAGGAATGATGGTCAATCAGTGTTAACTTGCATATTGTTGGCACAGAACAGGAGGTGTGAATGCACGTTT  
CAAAGCTTTCCTGTTTCCAGGGTCTGAGTGCAAGTTCATGTGTGGAAATGGGACGGAGGTCCTTTGGACA  
GCTGACTGAATGCAGAACGGTTTTTGGATCTGGCATTGAAATGCCTCTTGACCTTCCCCTCCACCCGCCC  
TAACCCCTCTCATTTACCTCGCAGTGTGTTCTAATCCAAGGGCCAGTTGGTGTTCTCAGTAGCTTTAC  
TTTCTTCCTTTCCCCCAAATGGTTGCGTCCTTTGAACCTGTGCAATATGAGGCCAAATTTAATCTTTG  
AGTCTAACACACCACTTTCTGCTTTCCGAAGTTCAGATAACTGGGTTGGCTCTCAATTAGACCAGGTAG  
TTTGTTGCATTGCAGGTAAGTCTGGTTTTGTCCCTTCAGGAGGACATAGCCTGCAAAGCTGGTTGTCTT  
TACATGAAAGCGTTTACATGAGACTTCCGACTGCTTTTTTGATTCTGAAGTTCAGCATCTAAAGCAGCA  
GGTCTAGAAGAACAACGGTTTATTCATACTTGCACTCTTTTGGCAGTTCTGATAAGCTTCCTAGAAAGTT  
CTGTGTAAACAGAAGCCTGTTTCAGAAATCTGGAGCTGGCACTGTGGAGACCACACACCCTTTGGGAAAG  
CTCTTGCTCTTCTTCCCCACTACCTCTTATTTATTTGGTGTTTGCTTGAATGCTGGTACTATTGTGAC  
CACAGGCTGGTGTGTAGGTGGTAAACCTGTTCTCCATAGGAGGGAAGGAGCAGTCACTGGGAGAGGTTA  
CCCGAGAAGCACTTGAGCATGAGGAACTGCACCTTTAGGCCATCTCAGCTTGCTGGGCCTTTTGTTAAAC  
CCTTCTGTCTACTGGCCTCCCTTTGTGTGCATACGCCTCTTGTTTCATGTCAGCTTATATGTGACACTGCA  
GCAGAAAGGCTCTGAAGGTCCAAAGAGTTTCTGCAAAGTGTATGTGACCATCATTTCCAGGCCATTAGG  
GTTGCCTCACTGTAGCAGGTTCTAGGCTACCAGAAGAGGGGCAGCTTTTTCATACCAATTCCAACCTTCA  
GGGGCTGACTCTCCAGGGAGCTGATGTCATCACACTCTCCATGTTAGTAATGGCAGAGCAGTCTAAACAG  
AGTCCGGGAGAATGCTGGCAAAGGCTGGCTGTGTATACCCACTAGGCTGCCCCACGTGCTCCCAGAGAT  
GACACTAGTCAGAAAATTGGCAGTGGCAGAGAATCCAACTCAACAAGTGCTCCTGAAAGAAACGCTAGA  
AGCCTAAGAACTGTGGTCTGGTGTTCAGCTGAGGCAGGGGGATTGGTAGGAAGGAGCCAGTGAACCTTG  
GCTTTCCTGTTTCTATCTTTCATTAATAAAGAATAGAAGGATTCAGTCATAAAGAGGTAAAAAACTGTCAC  
GGTACGAAATCTTAGTGCCACGGAGGCCTCGAGCAGAGAGAATGAAAGTCTTTTTTTTTTTTTTTTTT

TTTAGCATGGCAATAAATATTCTAGCATCCCTAACTAAAGGGGACTAGACAGTTAGAGACTCTGTCACCC  
TAGCTATACCAGCAGAAAAACCTGTTTCAGGCAGGCTTTCTGGGTGTGACTGATTCCCAGCCTGTGGCAGGG  
CGTGGTCCCACTACTCAGCCTAGCACAGGCTGGCAGTTGGTACTGAATTGTCAGATGTGGAGTATTAGT  
GACACCACACATTTAATTCAGCTTTGTCCAAAGGAAAGCTTAAAACCAATACAGTCTAGTTTCTGGTT  
CCGTTTTAGAAAAGGAAAACGTGAACAACTTAGAAAAGGGAAGGAAATCCCATCAGTGAATCCTGAACT  
GGTTTTAAGTGCTTTCCTTCTCCTCATGCCAAGAGATCTGTGCCATAGAACAAGATACCAGGCACTTAA  
AGCCTTTTCCTGAATTGGAAAGGAAAAGAGGCCCAAGTGCAAAAGAAAAACATTTTAGAAACGGACAGC  
TTATAAAAATAAAGGGAAGAAAGGAGGCAGCATGGAGAGAGGCCTGTGCTAGAAGCTCCATGGACGTGTC  
TGCACAGGGTCTCAGCTCATCCATGCGGCCTGGGTGTCTTTTACTCAGCTTTATAACAAATGTGGCTC  
CAAGCTCAGGTGCCTTTGAGTTCTAGGAGGCTGTGGGTTTTATTCAACTACGTTGGGAGAATGAGACCT  
GGAGTCATGTTGAAGGTGCCAACCTAAAAATGTAGGCTTTCATGTTGCAAAGAACTCCAGAGTCAGTAG  
TTAGGTTTGGTTTGGTTTTGGACATGATAAACCTGCCAAGAGTCAACAGGTCACTTGATCATGCTGCAGT  
GGGTAGTTCTAAGGATGGAAAGGTGACAGTATTACTCTCGAGAGGCAATTCAGTCCTGGGCAAAGGTATT  
AGTACAATAAGCGTTAAGGGCAGAGTCTACCTTGAAACCAATTAAGCAGCTTGGTATTCATAAATATTGG  
GATTGGATGGCCTCCATCCAGAAATCACTATGGGTGAGCATACTGTCTCAGCTGTTTGGCCAATGTGCA  
TAACCTACTCGGATCCCCACCTGACACTAACCAGAGTCAGCACAGGCCCCGAGGAGCCCGAAGTCTGCTG  
CTGTGCAGCATGGAATTCCTTTAAAAAGGTGCACTACAGTTTTAGCGGGGAGGGGGATAGGAAGACGCAG  
AGCAAATGAGCTCCGGAGTCCCTGCAGGTGAATAAACACACAGATCTGCATCTGATAGAACTTTGATGGA  
TTTTCAAAAAGCCGTTGACAAGGCTCTGCTATACAGTCTATAAAAATTGTTATTATGGGATTGGAAGAAA  
CACGTGGTCATGAATAGAAAAAAAACAAACCCAAAGGTAGGAAGGTCAAGGTCATTTCTTAGATGGAGAA  
GTTGTGAAAGATGTCCTTGGAGATGAGTTTTAGGACCAGCATTACTAAGGCAGGTGGGCAGACAGTGACC  
TCTCTAGGTGTGTCCACAGAGTTTTTCAGGAGAGAAAACTGCCTGACCTTTGGGACTAAGCTGCGGAATC  
TTCTTACTAAGCTTGAAGAGTGGAGAGGCGAGAGGTGAGCTACTTTGTGAGCCAAAGCTTATGTGACATG  
GTTGGGGAAACAGTCCAACTGTTCTGAGAAGGTGAACTGTTACGACCCAGGACAATTAGAAAAATTCAC  
CCACCATGCCGCACATTACTGGGTAAAAGCAGGGCAGCAGGGAACAAAACCTCCAGACTCTTGGGCCGTCC

CCATTTGCAACAGCACACATAGTTTCTGGTATATTTGTTGGGAAAGATAAAACTCTAGCAGTTGTTGAGG  
GGAGGATGTATAAAATGGTCATGGGGATGAAAGGATCTCTGAGACCACAGAGGCTCAGACTCACTGTAA  
GAATAGAAAACCTGGGTATGCGTTTCATGTAGCCAGCAGAACTGAAGTGTGCTGTGACAAGCCAATGTGAA  
TTTCTACCAAATAGTAGAGCATACCACTTGAAGAAGGAAAGAACCGAAGAGCAAACAAAAGTTCTGCGTA  
ATGAGACTCACCTTTTCTCGCTGAAAGCACTAAGAGGTGGGAGGAGGCCTGCACAGGCTGGAGGAGGGTT  
TGGGCAGAGCGAAGACCCGGCCAGGACCTTGGTGAGATGGGGTGCCGCCACCTCCTGCGGATACTCTTG  
GAGAGTTGTTCCCCAGGGGGCTCTGCCCCACCTGGAGAAGGAAGCTGCCTGGTGTGGAGTGACTCAAAT  
CAGTATACCTATCTGCTGCACCTTCACTCTCCAGGGTACATGCTTTAAAACCGACCCGCAACAAGTATTG  
GAAAAATGTATCCAGTCTGAAGATGTTTGTGTATCTGTTTACATCCAGAGTTCTGTGACACATGCCCCC  
AGATTGCTGCAAAGATCCCAAGGCATTGATTGCACTTGATTAAGCTTTTGTCTGTAGGTGAAAGAACAAG  
TTTAGGTCGAGGACTGGCCCCTAGGCTGCTGCTGTGACCCTTGTCCCATGTGGCTTGTTCCTGTCCGG  
GACTCTTCGATGTGCCCAGGGGAGCGTGTTCTGTCTCTTCCATGCCGTCTGCAGTCCTTATCTGCTCG  
CCTGAGGGAAGAGTAGCTGTAGCTACAAGGGAAGCCTGCCTGGAAGAGCCGAGCACCTGTGCCCATGGCT  
TCTGGTCATGAAACGAGTTAATGATGGCAGAGGAGCTTCCTCCCCACTTCGCAGCGCCACATTATCCATC  
CTCTGAGATAAGTAGGCTGGTTTAACCATTGGAATGGACCTTTCAGTGGAACCCTGAGAGTCTGAGAAC  
CCCCAGACCAACCCTTCCCTCCCTTCCCCACCTCTTACAGTGTTTGGACAGGAGGGTATGGTGCTGCTC  
TGTGTAGCAAGTACTTTGGCTTATGAAAGAGGCAGCCACGCATTTTGCCTAGGAAGAATCAGTAATCAC  
TTTTCAGAAGACTTCTATGGACCACAAATATATTACGGAGGAACAGATTTTGCTAAGACATAATCTAGTT  
TTATAACTCAATCATGAATGAACCATGTGTGGCAAACCTTGCAGTTTAAAGGGGTCCCATCAGTGAAAGAA  
ACTGATTTTTTTTAAACGGACTGCTTTTAGTTAAATTGAAGAAAGTCAGCTCTTGTCAAAAGGTCTAACT  
TTCCCGCCTCAATCCTAAAAGCATGTCAACAATCCACATCAGATGCCATAAATATGAACTGCAGGATAAA  
ATGGTACAATCTTAGTGAATGGGAATTGGAATCAAAGAGTTTGCTGTCCTTCTAGAATGTTCTAAAT  
GTCAAGGCAGTTGCTTGTGTTTAACTGTGAACAAATAAAAATTTATTGTTTTGCACTA

>NM\_000548.5 Homo sapiens TSC complex subunit 2 (TSC2), transcript variant 1, mRNA

GCTTCCGGCGGCGTCCCGGGGCCAGGGGGGTGCGCCTTTCTCCGCGTCGGGGCGGCCCCGGAGCGCGGTGG  
CGCGGCGCGGGAGGGGTTTTCTGGTGCGTCCTGGTCCACCATGGCCAAACCAACAAGCAAAGATTTCAGGC  
TTGAAGGAGAAGTTTAAGATTCTGTTGGGACTGGGAACACCGAGGCCAAATCCCAGGTCTGCAGAGGGTA  
AACAGACGGAGTTTATCATCACCGCGAAATACTGAGAGAACTGAGCATGGAATGTGGCCTCAACAATCG  
CATCCGGATGATAGGGCAGATTTGTGAAGTCGAAAAACCAAGAAATTTGAAGAGCACGCAGTGGAAGCA  
CTCTGGAAGGCGGTGCGGATCTGTTGCAGCCGAGCGGCCGCTGGAGGCCCGGCACGCGGTGCTGGCTC  
TGCTGAAGGCCATCGTGCAGGGGCAGGGCGAGCGTTTGGGGGTCTCAGAGCCCTCTTCTTTAAGGTCAT  
CAAGGATTACCCTTCCAACGAAGACCTTCACGAAAGGCTGGAGGTTTTCAAGGCCCTCACAGACAATGGG  
AGACACATCACCTACTTGGAGGAAGAGCTGGCTGACTTTGTCCTGCAGTGGATGGATGTTGGCTTGCCT  
CGGAATTCCTTCTGGTGCTGGTGAAGTGGTCAAATCAATAGCTGTTACCTCGACGAGTACATCGCAAG  
GATGGTTCAGATGATCTGTCTGCTGTGCGTCCGGACCGCGTCCTCTGTGGACATAGAGGTCTCCCTGCAG  
GTGCTGGACGCCGTGGTCTGCTACAACTGCCTGCCGGCTGAGAGCCTCCCGCTGTTTCATCGTTACCCTCT  
GTCGCACCATCAACGTCAAGGAGCTCTGCGAGCCTTGCTGGAAGCTGATGCGGAACCTCCTTGGCACCCA  
CCTGGGCCACAGCGCCATCTACAACATGTGCCACCTCATGGAGGACAGAGCCTACATGGAGGACGCGCCC  
CTGCTGAGAGGAGCCGTGTTTTTGTGGGCATGGCTCTCTGGGGAGCCCACCGGCTCTATTCTCTCAGGA  
ACTCGCCGACATCTGTGTTGCCATCATTTTACCAGGCCATGGCATGTCCGAACGAGGTGGTGTCTATGA  
GATCGTCTGTCCATCACCAAGGCTCATCAAGAAGTATAGGAAGGAGCTCCAGGTGGTGGCGTGGGACATT  
CTGCTGAACATCATCGAACGGCTCCTTCAGCAGCTCCAGACCTTGGACAGCCCGGAGCTCAGGACCATCG  
TCCATGACCTGTTGACCACGGTGGAGGAGCTGTGTGACCAGAACGAGTCCACGGGTCTCAGGAGAGATA  
CTTTGAACTGGTGGAGAGATGTGCGGACCAGAGGCCTGAGTCCTCCCTCCTGAACCTGATCTCCTATAGA  
GCGCAGTCCATCCACCCGGCCAAGGACGGCTGGATTCAGAACCTGCAGGCGCTGATGGAGAGATTCTTCA  
GGAGCGAGTCCCGAGGCGCCGTGCGCATCAAGGTGCTGGACGTGCTGTCCTTTGTGCTGCTCATCAACAG  
GCAGTTCTATGAGGAGGAGCTGATTAACCTCAGTGGTCATCTCGCAGCTCTCCACATCCCCGAGGATAAA

GACCACCAGGTCCGAAAGCTGGCCACCCAGTTGCTGGTGGACCTGGCAGAGGGCTGCCACACACACCACT  
TCAACAGCCTGCTGGACATCATCGAGAAGGTGATGGCCCGCTCCCTCTCCCCACCCCGGAGCTGGAAGA  
AAGGGATGTGGCCGCATACTCGGCCTCCTTGGAGGATGTGAAGACAGCCGTCCTGGGGCTTCTGGTCATC  
CTTCAGACCAAGCTGTACACCCTGCCTGCAAGCCACGCCACGCGTGTGTATGAGATGCTGGTCAGCCACA  
TTCAGTCCACTACAAGCACAGCTACACCCTGCCAATCGCGAGCAGCATCCGGCTGCAGGCCTTTGACTT  
CCTGTTGCTGCTGCGGGCCGACTACTGCACCGCCTGGGCCTGCCCAACAAGGATGGAGTCGTGCGGTTT  
AGCCCCTACTGCGTCTGCGACTACATGGAGCCAGAGAGAGGCTCTGAGAAGAAGACCAGCGCCCCCTTT  
CTCCTCCACAGGGCCTCCTGGCCCGGCGCCTGCAGGCCCCGCCGTGCGGCTGGGGTCCGTGCCCTACTC  
CCTGCTCTTCCGCGTCTGCTGCAGTGCTTGAAGCAGGAGTCTGACTGGAAGGTGCTGAAGCTGGTTCTG  
GGCAGGCTGCCTGAGTCCCTGCGCTATAAAGTGCTCATCTTTACTTCCCCTTGCAGTGTGGACCAGCTGT  
GCTCTGCTCTCTGCTCCATGCTTTCAGGCCCAAAGACACTGGAGCGGCTCCGAGGCGCCCCAGAAGGCTT  
CTCCAGAACTGACTTGACCTGGCCGTGGTTCCAGTGCTGACAGCATTAATCTCTTACCATAACTACCTG  
GACAAAACCAAACAGCGCGAGATGGTCTACTGCCTGGAGCAGGGCCTCATCCACCGCTGTGCCAGCCAGT  
GCGTCGTGGCCTTGTCCATCTGCAGCGTGGAGATGCCTGACATCATCATCAAGGCGCTGCCTGTTCTGGT  
GGTGAAGCTCACGCACATCTCAGCCACAGCCAGCATGGCCGTCCCACTGCTGGAGTTCCTGTCCACTCTG  
GCCAGGCTGCCGCACCTCTACAGGAACTTTGCCGCGGAGCAGTATGCCAGTGTGTTGCCATCTCCCTGC  
CGTACACCAACCCCTCCAAGTTTAATCAGTACATCGTGTGTCTGGCCCATCACGTCATAGCCATGTGGTT  
CATCAGGTGCCGCTGCCCTCCGGAAGGATTTTGTCCCTTTCATCACTAAGGGCCTGCGGTCCAATGTC  
CTCTTGCTTTTTGATGACACCCCCGAGAAGGACAGCTTCAGGGCCCGGAGTACTAGTCTCAACGAGAGAC  
CCAAGAGTCTGAGGATAGCCAGACCCCCCAAACAAGGCTTGAATAACTCTCACCCGTGAAAGAATTCAA  
GGAGAGCTCTGCAGCCGAGGCCTTCCGGTGCCGAGCATCAGTGTGTCTGAACATGTGGTCCGCAGCAGG  
ATACAGACGTCCCTCACCAGTGCCAGCTTGGGGTCTGCAGATGAGAACTCCGTGGCCCAGGCTGACGATA  
GCCTGAAAAACCTCCACCTGGAGCTCACGGAAACCTGTCTGGACATGATGGCTCGATACGTCTTCTCAA  
CTTCACGGCTGTCCCGAAGAGGTCTCCTGTGGGCGAGTTCCTCTAGCGGGTGGCAGGACCAAAACCTGG  
CTGGTTGGGAACAAGCTTGTCACTGTGACGACAAGCGTGGAACCGGGACCCGGTCGTTACTAGGCCTGG

ACTCGGGGGAGCTGCAGTCCGGCCCCGAGTCGAGCTCCAGCCCCGGGTGCATGTGAGACAGACCAAGGA  
GGCGCCGGCCAAGCTGGAGTCCCAGGCTGGGCAGCAGGTGTCCCGTGGGGCCCGGGATCGGGTCCGTTCC  
ATGTCGGGGGGCCATGGTCTTCGAGTTGGCGCCCTGGACGTGCCGGCCTCCCAGTTCCTGGGCAGTGCCA  
CTTCTCCAGGACCACGGACTGCACCAGCCGCGAAACCTGAGAAGGCCTCAGCTGGCACCCGGGTTCCTGT  
GCAGGAGAAGACGAACCTGGCGGCCTATGTGCCCTGCTGACCCAGGGCTGGGCGGAGATCCTGGTCCGG  
AGGCCACAGGGAACACCAGCTGGCTGATGAGCCTGGAGAACCCGCTCAGCCCTTCTCCTCGGACATCA  
ACAACATGCCCCTGCAGGAGCTGTCTAACGCCCTCATGGCGGCTGAGCGCTTCAAGGAGCACCGGGACAC  
AGCCCTGTACAAGTCACTGTCGGTGCCGGCAGCCAGCACGGCCAAACCCCTCCTCTGCCTCGCTCCAAC  
ACAGTGGCCTCTTCTCCTCCCTGTACCAGTCCAGCTGCCAAGGACAGCTGCACAGGAGCGTTTCCTGGG  
CAGACTCCGCCGTGGTCATGGAGGAGGGAAGTCCGGGCGAGGTTCTGTGCTGGTGGAGCCCCAGGGTT  
GGAGGACGTTGAGGCAGCGCTAGGCATGGACAGGCGCACGGATGCCTACAGCAGGTCGTCCTCAGTCTCC  
AGCCAGGAGGAGAAGTCGCTCCACGCGGAGGAGCTGGTTGGCAGGGGCATCCCCATCGAGCGAGTCGTCT  
CCTCGGAGGGTGGCCGGCCCTCTGTGGACCTCTCCTCCAGCCCTCGCAGCCCCTGAGCAAGTCCAGCTC  
CTCTCCCGAGCTGCAGACTCTGCAGGACATCCTCGGGGACCCTGGGGACAAGGCCGACGTGGGCCGGCTG  
AGCCCTGAGGTTAAGGCCCGGTCACAGTCAGGGACCCTGGACGGGGAAAGTGCTGCCTGGTCGGCCTCGG  
GCGAAGACAGTCGGGGCCAGCCCGAGGGTCCCTTGCTTCCAGCTCCCCCGCTCGCCCAGTGGCCTCCG  
GCCCCGAGGTTACACCATCTCCGACTCGGCCCCATCACGCAGGGGCAAGAGAGTAGAGAGGGACGCCTTA  
AAGAGCAGAGCCACAGCCTCCAATGCAGAGAAAGTGCCAGGCATCAACCCAGTTTCGTGTTCTGCAGC  
TCTACCATTCCCCCTTCTTTGGCGACGAGTCAAACAAGCCAATCCTGCTGCCCAATGAGTCACAGTCCTT  
TGAGCGGTCGGTGCAGCTCCTCGACCAGATCCCATCATACGACACCCACAAGATCGCCGTCTGTATGTT  
GGAGAAGGCCAGAGCAACAGCGAGCTCGCCATCCTGTCCAATGAGCATGGCTCCTACAGGTACACGGAGT  
TCCTGACGGGCCTGGGCCGGCTCATCGAGCTGAAGGACTGCCAGCCGGACAAGGTGTACCTGGGAGGCCT  
GGACGTGTGTGGTGAGGACGGCCAGTTCACCTACTGCTGGCACGATGACATCATGCAAGCCGTCTTCCAC  
ATCGCCACCCTGATGCCACCAAGGACGTGGACAAGCACCGCTGCGACAAGAAGCGCCACCTGGGCAACG  
ACTTTGTGTCCATTGTCTACAATGACTCCGGTGAGGACTTCAAGCTTGGCACCATCAAGGGCCAGTTCAA

CTTTGTCCACGTGATCGTCACCCCGCTGGACTACGAGTGCAACCTGGTGTCCCTGCAGTGCAGGAAAGAC  
ATGGAGGGCCTTGTGGACACCAGCGTGGCCAAGATCGTGTCTGACCGCAACCTGCCCTTCGTGGCCCGCC  
AGATGGCCCTGCACGCAAATATGGCCTCACAGGTGCATCATAGCCGCTCCAACCCACCGATATCTACCC  
CTCCAAGTGGATTGCCCGGCTCCGCCACATCAAGCGGCTCCGCCAGCGGATCTGCGAGGAAGCCGCTAC  
TCCAACCCAGCCTACCTCTGGTGCACCTCCGTCCCATAGCAAAGCCCCTGCACAGACTCCAGCCGAGC  
CCACACCTGGCTATGAGGTGGGCCAGCGGAAGCGCCTCATCTCCTCGGTGGAGGACTTCACCGAGTTTGT  
GTGAGGCCGGGGCCCTCCCTCCTGCACTGGCCTTGGACGGTATTGCCTGTCAGTGAAATAAATAAAGTCC  
TGACCCAGTGCACAGACATAGAGGCACAGATTGCAGTCAGACAGCTCTTTTATTGACTTTGTCTGCTTG  
GTGCGGGGGTTGGGGGGGTGTCGAGGCTCTAGAAGCGGCCATGCCACAGAAGTGGTACACAGAAGCAGG  
CACAGCCAGCTCCGAGGGCCTTGAGGCTGCCTGGGCCATACAGCACACTCGCGCGTGC GCGCGCGCACAC  
ACACACACACACAGTCACCTTCCTCCACCCTGGGAGCCAGCCCCAGGAGGAGTCTTTTCCTCTAACCAC  
CCTGGGGTCTCTGACATGCCTAGTCCTGCTACTTGCCAGACCTGATGCCAGCAGGCCTGGGCGCTGCT  
CTCTTGCTACCTGGCCTGGGGCAAGGGAGGATGACAAGGCCTCTGGGGTGATGAGAGTGCCTGGCAGACA  
GCTGTGCCCCCAGCACCGGCCCAAGGCCAAGCTCGCATCCAAGCAGCAGCCGGGCTGCCATAACGCCACC  
ACACCTACCAAGCGCAGCAGGTGTTGGGGGAGGCCAGCTCTGGGCGCAGGCCCTCAGCCCTAGTGAAAA  
TAGTGACATACAAAAATATACACATTTTAACACCATATAAATTACTGACACGAGACACACAGTGAGACGG  
TGCAGGGAGTACGGTAGGAACTGGAGAGGTAATAACTTAGGGGCAGGGTGGCGGGCGGTGCAGGCTAACCC  
TCCCTGAAGCCAGCAGCCTTAGCAGTGGGGGACATCTGCCAGGGGGTGGGGCCGGGCACAGCCCGCTGT  
ACCTGAGGACTCGGGGAAATAAATTAGCATCTCAGAGGCTAGAAA

>NM\_001004125.3 Homo sapiens tumor suppressor candidate 1 (TUSC1), mRNA

AGCAGCCGCCGCCGCGACCTCCTCTCCTCCGTGTCACCCCGCCGCCCTGCCAGCCCCGAACTTG  
CCCGCGCCTGGCCGCGCGGCCCTCAGCCACGGGGCTGGCGGCGCGTTGGGATGGGACCGATGTGGCG

CATGCGTGGTGGCGCCACTAGGCGCGGGAGTTGCTGCGGCGGGGACGGTGCTGCGGACGGCCGAGGGCCA  
GGCCGCTCCGGCCGGGCTCGTGGTGGGGGCAGCCCCAGCGGCGGCGGGCGGCGTGGGCTGGCGAGGCC  
GCGCGGACGGCGCCCGACAGCAGCTGGAGGAGCGGTTTGCCGACCTGGCGGCGAGCCACTTGGAGGCCAT  
CCGTGCGCGGGACGAGTGGGACCGGCAGAACGCGCGGCTGCGTCAGGAGAACGCCCCGGCTGCGGCTCGAG  
AACGGCGGGCTGAAGCGCGAGAACCGCAGCCTCTCCGTGAGGCTTTGCGGCTCCCCGGCGAAGGCGGCA  
ACGGGACGCCCCGCGGAGGCACGCCGGGTCCCTGAAGAGGCCAGCACGAACCGGAGGGCTAGAGACAGCGG  
CCGAGAGGACGAGCCGGGCAGCCCCAGGGCCCTGAGGGCCCCGACTTGAGAAGCTGGAAGCCATGTACCGC  
CGGGCCCTGCTGCAGCTGCACCTCGAGCAGCGGGGACCACGTCCGAGCGGGGACAAGGAGGAGCAGCCTC  
TACAGGAACCCGACTCCGGCCTCCGCTCCCGGGACTCGGAGCCCTCTGGGCCCTGGCTGTAGCCGAGGCC  
GCAGCCGGTGAGAGGCGGAGCCTCGAGCGGGCCCCCTCCTCCTCCGTTCCAGCTACCCCCGACCTCGCGC  
ACGCCCTGGCCCGCTCCCTGCCCCGCGGATACCTTGGA CTACGGTGCCTTCCCGCCCCACCAGTGGACAC  
TTCCGGGTGGCGCTTGCCATCCGCTTGGTGGAGGTCGAGTGGGTGCAAGGGCCCTCAGGACCTCCCACA  
TGTACAGTCCCCTGCCTCTTGCCCCGGCTAGTTTCCCTGGAGAGAGGCCTAGCCAACAACGAAGGGACG  
GATTTTAAACAGCGAGAACTGGGTGCCAAGAAACACTTCATATCCCTGAACTTTTCTGGATGTTGTGC  
GAACCTGTTGTATTTTTTTTTTCTGTATTTGGTTCTGAGGGATGAGTAATGTGTTTTAGTTGGTTG  
AGTTTATCCATTCTTCAATCCCCTAAAGCCTTCAGCTATTCTTTCATATGTGGCCAACATTTTAAGTACA  
GTGTTTGCTTTTATAAGTCGGTGTTACTTGATGTCCTATAAAATACCCACTTTTTATAAAGATGATATT  
TATAACCTAGGAACTCATGCCTGTCTTGCTGCAGTCCCTGTACATCTAATATATACTGATTTGTTTGCC  
CCCAGAGAATTTTAAAGGTATCTGCCTATATCGTGATCTTTTGAAATGGTAAATAAATCTGGTGCATTAA  
AAATTA

>NM\_003565.4 Homo sapiens unc-51 like autophagy activating kinase 1 (ULK1), mRNA

AGTGCGGCTGCGCGGGCGTCTCAGGCTCTGAGGCCCGGGCGCCGCGGCTCTTTGTTTCTCCGTTGGGGC

CGAGCCCGGGCCCTAGTTGGAGCCGGAGTCGGAGTCGGAGTCGGATCCGGATTCGGATTAGCAGCCCGGG  
AAGAGTGCCGTGGCACAGGCGCCGGAGGGAGCGCGACCCTCGGACCCCGCCTGGCCCGCGGGGCTGGGAC  
CCGGCCCCGGCCTGCCGATGGGGCGCGCGGCCCGGAGATGCGCCCTCGCCCGGCCCGCGCCCCCGGC  
CCCGCGCCCCGGCCCGCCCGCCCGGCCCGCGCCTCCGCCTGAGTCCCCCGCGCCTTGCCCCGCCACCC  
CCCGCCCCGCGCCCCGGCCCGCCTGCGCCATGGAGCCCGGCCGCGGCGGCACAGAGACCGTGGGCAAGT  
TCGAGTTCTCCCGCAAGGACCTGATCGGCCACGGCGCCTTCGCGGTGGTCTTCAAGGGCCGCCACCGCGA  
GAAGCACGATTTGGAGGTCGCCGTCAAGTGCAATTAACAAGAAGAACCTCGCCAAGTCTCAGACGCTGCTG  
GGGAAGGAAATCAAAATCCTGAAGGAACTGAAACATGAAAACATCGTGGCCCTGTACGACTTCAGGAAA  
TGGCTAATTCTGTCTACCTGGTTATGGAGTACTGCAACGGTGGGGACCTGGCCGACTACCTGCACGCCAT  
GCGCACGCTGAGCGAGGACACCATCAGGCTCTTCCTGCAGCAGATCGCGGGCGCCATGCGGCTTCTGCAC  
AGCAAAGGCATCATCCACCGCGACCTGAAACCGCAGAACATCCTGCTGTCCAACCCCGCCGGCCGCCGCG  
CCAACCCCAACAGCATCCGCGTCAAGATCGCTGACTTCGGCTTCGCGCGGTACCTCCAGAGCAACATGAT  
GGCGGCCACACTCTGCGGCTCCCCATGTACATGGCCCCGAGGTCATCATGTCCCAGCACTACGACGGG  
AAGGCGGACCTGTGGAGCATCGGCACCATCGTCTACCAGTGCCTGACGGGGAAGGCGCCCTTCCAGGCCA  
GCAGCCCCCAGGACCTGCGCCTGTTCTACGAGAAGAACAAGACGTTGGTCCCCACCATCCCCGGGAGAC  
CTCGGCCCCGCTGCGGCAGCTGCTCCTGGCCCTACTGCAACGCAACCACAAGGACCGCATGGACTTCGAT  
GAGTTTTTTCATCACCTTTTCCTCGATGCCAGCCCCTCGGTGAGGAAATCCCCACCCGTGCCTGTGCCCT  
CGTACCCAAGCTCGGGGTCCGGCAGCAGCTCCAGCAGCAGCTCCACCTCCCACCTGGCCTCCCCGCCGTC  
CCTGGGCGAGATGCAGCAGCTGCAGAAGACCCTGGCCTCCCCGGCTGACACCGCTGGCTTCCTGCACAGC  
TCCCGGGACTCTGGTGGCAGCAAGGACTCTTCCTGTGACACAGACGACTTCGTGATGGTCCCCGCGCAGT  
TTCCAGGTGACCTGGTGGCTGAGGCGCCAGTGCCAAACCCCGCCAGACAGCCTGATGTGCAGTGGGAG  
CTCACTGGTGGCCTCTGCGGGCTTGAGAGGCCACGGCCGGACCCCATCTCCATCCCCACCCTGCAGCAGC  
TCCCCAGTCCCTCAGGCCGGGCTGGCCCGTTCTCCAGCAGCAGGTGCGGCGCCTCTGTCCCCATCCCAG  
TCCCCACGCAGGTGCAGAACTACCAGCGCATTGAGCGAAACCTGCAGTCACCCACCCAGTTCCAAACACC  
TCGGTCCTTGCCATCCGCAGGTGAGGACAGCACCAGCCCCCTGGGCTTGCAAGGGCCAGCCCCCTGCCC

CCTGCCCACGCTGAGCATGGAGGCGTCCTGGCCAGGAAGATGTCTCTGGGTGGAGGCCGGCCCTACACGC  
CATCTCCTCAAGTTGGAACCATCCCTGAGCGGCCAGGCTGGAGCGGGACGCCCTCCCCACAGGGAGCTGA  
GATGCGGGGTGGCAGGTCCCCTCGTCCAGGCTCCTCTGCACCCGAGCACTCTCCCCGCACTTCCGGGCTG  
GGCTGCCGCTGCACAGCGCCCCAACCTGTCTGACTTGACGTCGTCCGCCCCAAGCTGCCCAAACCCC  
CCACGGACCCCCTGGGAGCTGTGTTACGCCACCACAGGCCAGCCCTCCCCAGCCGTCCCACGGCCTGCA  
GTCCTGCCGGAACCTGCGGGGCTACCCAAGCTGCCGACTTCTGCAGCGAAACCCCCTGCCCCCATC  
CTGGGCTCCCCACCAAGGCTGTGCCCTCCTTTGACTTCCGAAGACCCCCAGCTCCCAGAACCTGCTGG  
CCCTCCTAGCCCGGCAGGGCGTGATGACGCCCCCTCGAAACCGGACGCTGCCGACCTCTCGGAGGT  
GGGACCTTCCATGGTCAGCCGTTGGGCCCTGGCCTGCGGCCAGGCGAGGACCCAAGGGCCCCCTTTGGC  
CGGTCTTTCAGCACAGCCGCTCACTGACCTGCTCCTTAAGGCGGCGTTTGGGACACAAGCCCCGGACC  
CGGGCAGCACGGAGAGCCTGCAGGAGAAGCCCATGGAGATCGCACCTCAGCTGGCTTTGGAGGGAGCCT  
GCACCCAGGAGCCCGTGCTGGGGGCACCAGCAGCCCTTCCCCGGTGGTCTTACCGTGGGCTCTCCCCG  
AGCGGGAGCACGCCCCCAGGGCCCCCGCACCAGGATGTTCTCAGCGGGCCCCACTGGCTCTGCCAGCT  
CTTCTGCCCCGCCACCTGGTGCCTGGGCCCTGCAGCGAGGCCCGAGCCCTGAGCTCCCTGCTCCAGGACA  
CGGCTGCAGCTTTGCCGACCCATTACTGCGAACCTGGAGGGGGCTGTGACCTTCGAGGCCCCCGACCTC  
CCTGAGGAGACCCTCATGGAGCAAGAGCACACGGAGATCCTGCGTGGCCTGCGCTTACGCTGCTGTTG  
TGCAGCACGTCTGGAGATCGCAGCCCTGAAGGGCAGCGCCAGTGAGGCGGCGGGGGGCCCTGAGTACCA  
GCTGCAGGAGAGTGTGGTGGCCGACCAGATCAGCCTGCTGAGCCGAGAATGGGGCTTCGCGGAACAGCTG  
GTGCTGTACCTGAAGGTGGCCGAGCTACTGTCTCCGGCCTGCAAAGTGCCATCGACCAGATCCGGGCCG  
GCAAGCTCTGCCTGTCGTCCACTGTGAAGCAGGTGGTGCAGGCTGAATGAGCTGTACAAGGCCAGCGT  
GGTGTCTGCCAGGGCCTGAGCCTGCGGCTGCAGCGCTTCTTCTGGACAAGCAGCGGCTCCTGGACCGC  
ATTCACAGCATCACTGCCGAGAGGCTCATCTTCAGCCACGCTGTGCAGATGGTGCAGTCGGCTGCCCTGG  
ACGAGATGTTCCAGCACCGTGAGGGCTGCGTCCCACGCTACCACAAGGCCCTGTGCTCCTGGAGGGGCT  
GCAGCACATGCTCTCGGACCAGGCCGACATCGAGAACGTACCAAGTGCAAGCTGTGCATTGAGCGGAGA  
CTCTCGGCGCTGCTGACTGGCATCTGTGCCTGACCTTTCTGGCCTGGCTGGGCCCCCGTCCTGCCGAGC

CCTGCAGAGTGGGCTCTGTGTGCTGGCTGGACTCCTCGGGACAAGCCCATGGCGCTGATCGCTGGTGCTG  
AGCCCTGCCCTGGGCCCCACGGACAGTCAGCCTGCCGGCCTCCCTGCAGCTCACGGGGCAGAACCAGCAC  
ATCTGGAGCCACACAGCTTGGGGGGTGTCTCCCATCTTTTACAGGTGGGGATCACAGAATTTCTGCCCCT  
CCAGCTGCCTGGCTCAGCAGGCGTGGGTGCCACCACCCTCTAGCCCCAGGGCAGCCCCGGAGGACAGGCA  
AGGGCCTGAGACCACTGCCGACTCAAAGCCAAAGCGAGCTCCTGCTTAGGGAAGGTGAGCAGGCACTGTG  
CCCAGGAAGAGCCTGCGGCCTCGGCGTCCCCCAGTCTCCAGGAGCCTCTCCCTCCGAGATACCCACCCAG  
CTTTGTCAATCACCCAAGCACTTTATGCATATAGAGACAGAACCTGGACCTCACCAGGGACTGCTGGGCA  
GCGATTCTGGCAGTGGCCTGGTGTGTTGTACATACACATATGCAGACACATGCCAGGGCCCCCAAGCCC  
GAGCACCGGACCACGTTGCTGCCCAGGTCTGGACCTCAGCGGGAGAACTGGCTCCGGGGGGAGTGGGGCC  
CTGCGCTAGAGGCAGAGGCAGTTCTTTGTTCAAGCGTTCCTCTGGGGACCGGCAGCAGAGGCACCGTGT  
CTCTCAGCCCTGGATACGTCTTGAATCTTTCACACTTTATTCTAAAACGTGTCTTATTTTTATGCAGC  
TCATTTTTCTTTAAAGGAGAAAACTTGTAGGTGTTTAAGAATTGGTTTTGGGAGGGCGAGGACTGGGCC  
AGGTTAGAGGCAGATGGCACAGGGGCGTGTGGCGGGCGGGTGAGGCTGCTTGCACACCTGTGTTGGTGG  
CTGTCCCCTGCCGCCCCCTCCCTGTGGCAGCAGCAGGACAGGTGTGTGCCCAGCACCTCCCTACCTGGGC  
CTGGAAGCAGATGAGGGGAATACTTCATGCAAAGAAAAAGTAACATGTGCAAAGCTCCCCGTCCAGCT  
TTGACAGTCAGTTTTGATGTCAGCTCCTCGGCAGGGTAGGCCTGATGACAGCCCTGTCCCTCCCTGCCTC  
TGCCTTGCCCAAGGCCACGGAGGGCATCTGCAGAGAGGCCTGCCTTCCGGATTCCAGGCGGGCATGCCCT  
GCAAACCCCGCTGGGCCTCCCTTGGTCTGCCCAGCCCTCGATTAGCCCTGCCTGAATCAGTAGATACTT  
GAACGAGTCCCCAGTCTGCGGGAGGCAGTGGTGGGGCCATGGACCCATGCGGGGGGTTCCAGGGTCACAC  
GCCACATAACAGACAAAAATACACACACGTGTGTTTTCTTTGCAATACTTGAAATATTGCCACTGTGCT  
TGGACTTAGAAGAAGAAAATCCCCGTGACTTCTTCCTCATCACCTTGATGGCTTTATTCTCACCTGTGG  
GGCATGTTTGATTTATTGCTTCATGGCCGACTGGAATCCTGAGTCCTGGGAAGCTGGCACTGCGGGGAT  
CTTGCCCGGTGTCCTGGTCCTCTTGCTTCGTCGCGGCCGCATGTGCGTGTGTCCAAGCAGGTCCTGGGC  
GCCTCAACTGCTGCCCTGGTTGAATGTTCTCTTGATAGTGCTGGACCTTTGTCTATTTTAAAGCGAAT  
TTTGTGTGATTTCTGCCCTTTGCGTTATATTGTATAATAACCAACGTAAGGAAATAAACCTTTGGAATTG

TT

>NM\_014683.4 Homo sapiens unc-51 like autophagy activating kinase 2 (ULK2), transcript variant 1, mRNA

AGTCGCGCGGGAGCGGGTAGCGCGCGCGAGGGCGTTGGGCGCCGCCGCGAGGCGGGGAAGCGCGGGGCCG  
CGGCGGTGCGGGTTCTAGGGCGGCGGCCGTCGCCGTCGCAGCAGCGCCCCGAGCGGGGAGGGCCGAGGAG  
GCCCCACGAGCTGGGGATGGAGAGTACCGGGCCCCTACTGCCTCAGAGCGCGTGTGCGGCTCTGGGCGC  
GCACAGTGACGGTGACGGCACCCCTGGCCCGGCAGCGCCGAGGCCGCTTCGCCAGACAGCCAGCGGCCGG  
CGGCAGGCCGGGCCATGAGCGGCAGGGGCCGGGCCGGGCTCGCTGACCCTGGCTCCGCGCGGCAGCTTC  
CCCAGTTTCCGCTCCGGTCTCTCGGCATGAGAGTCCGCCCCGGGCCGGGGCTGCGGCTGCCCCAGACCCG  
CCGCACGCTGGCGCGCTCCGGGCCCCGCGGAGCCGCGGTGCTGATACCTGCGCCGCACTGCGCCGCCGCC  
CGTCCGCTGTGTGCCCCGGGGGCGCGGCCATGGAGGTGGTGGGTGACTTCGAGTACAGCAAGAGGGATCT  
CGTGGGACACGGGGCCTTCGCCGTGGTCTTCGGGGGCGGCACCGCCAGAAAAGTATTGGGAGGTAGCT  
ATTAAAAGTATTAATAAAAAAGAACTTGTCAAAATCACAAATACTGCTTGAAAGGAAATTAATCTTAA  
AGGAACTTCAGCATGAAAATATTGTAGCACTCTATGATGTTTCAGGAATTACCCAACCTCTGTCTTTTGGT  
GATGGAGTATTGCAATGGTGGAGACCTCGCAGATTATTTGCAAGCGAAAGGGACTCTCAGTGAAGACACG  
ATCAGAGTGTTTCTGCATCAGATTGCTGCTGCCATGCGAATCCTGCACAGCAAAGGAATCATCCACAGAG  
ATCTCAAACCACAGAACATCTTGCTGTCCTATGCCAATCGCAGAAAATCAAGTGTCAGTGGTATTCGCAT  
CAAAATAGCGGATTTTGGTTTTGCTCGTTACCTACATAGTAACATGATGGCTGCAAACTGTGTGGATCC  
CCGATGTACATGGCTCCTGAGGTTATTATGTCTCAACATTATGATGCTAAGGCTGACTTGTGGAGCATAG  
GAACAGTGATATACCAATGCCTAGTTGGAAAACCACTTTTCAGGCCAATAGTCCTCAAGACTTAAGGAT  
GTTTTATGAAAAAACAGGAGCTTAATGCCTAGTATTCCAGAGAAACATCACCTTATTTGGCTAATCTC  
CTTTTGGGTTTGCTTCAGAGAAACCAAAAAGATAGAATGGACTTTGAAGCATTTTTTAGCCATCCTTTTC  
TTGAGCAAGGTCCAGTAAAAAATCTTGCCAGTTCAGTGCCCATGTATTCTGGTTCTGTCTCTGGAAG

CTCCTGTGGCAGCTCTCCATCTTGTGTTTTGCTTCTCCACCATCCCTTCCAGATATGCAGCATATTAG  
GAAGAAAATTATCTTCCCCACCATGGGTCTCCCACTATCTACAAGTTTCAAAGATTCTGCCAGTA  
CTAGTAGCAAGAACTCTTCTGTGACACGGATGACTTTGTTTTGGTGCCACACAACATCTCGTCAGACCA  
CTCATGTGATATGCCAGTGGGGACTGCTGGCAGACGTGCTTCAAATGAATTCTTGGTGTGTGGAGGGCAG  
TGTCAGCCTACTGTGTACCTCACAGCGAAACAGCACCAATTCCAGTTCCTACTCAAATAAGGAATTATC  
AGCGCATAGAGCAGAATCTTACATCTACTGCCAGCTCAGGCACAAATGTACATGGTTCTCCAAGATCTGC  
AGTGGTACGAAGGTCCAACACCAGCCCCATGGGCTTCTCCGGCCGGGATCATGCTCCCCAGTACCAGCA  
GACACAGCACAGACAGTTGGACGAAGGCTCTCCACTGGGTCTTCTAGGCCTTACTCACCTTCCCCTTTGG  
TTGGTACCATTCTGAGCAATTCAGTCAGTGCTGCTGTGGGCATCCTCAGGGCCATGACTCCAGGAGTAG  
AAACTCCTCAGGTTCTCCAGTGCCACAAGCTCAGTCCCCACAGTCTCTTATCGGGTGCTAGACTGCAG  
AGCGCCCCACCCTCACTGACATCTATCAGAACAAGCAGAAGCTCAGAAAACAGCACTCTGACCCCGTGT  
GCCATCCCATACTGGGGCTGGGTACAGCTACTCGCCTCAGCCCAGTCGGCCTGGCAGCCTTGGAATTTC  
TCCCACCAAGCACTTGGGGTCTCTCCACGGAGTTCTGACTGGTTCTTTAAACTCCTTGCCAACAATC  
ATTGGCTCTCCTACTAAGACCACAGCTCCTTTCAAATCCCTAAACTCAAGCATCTTCCAACCTGTTAG  
CCTTGGTTACTCGTCATGGGCCTGCTGAAGAACAGTCGAAAGATGGGAATGAGCCACGGGAATGTGCCCA  
TTGCCTCTTAGTGCAAGGAAGTGAGAGGCAGCGGGCCGAGCAGCAGAGCAAGGCAGTGTTTGGCAGATCT  
GTCAGTACCGGGAAGTTATCAGATCAACAAGGAAAGACTCCTATATGTCGACATCAGGGCAGCACAGACA  
GTTTAAATACAGAACGACCAATGGATATAGCTCCGGCAGGAGCCTGTGGTGGTGTCTGGCACCTCCTGC  
AGGTACAGCAGCAAGTTCCAAGGCTGTCCTCTTCACTGTAGGGTCTCCTCCACACAGTGCGGCAGCCCC  
ACTTGTACCCACATGTTCTTCGAACAAGAACAACCTCAGTGGGGCCAGCAACTCCGGGGGCTCTCTTT  
GTGCCATGAGTGGCCGCGTGTGCGTGGGGTCCCCGCTGGCCCAGGCTTCGGCTCTTCCCCTCAGGAGC  
AGAGGCAGCTCCCAGCCTGAGATACGTGCCTTACGGTGCTTACCCCCCAGCCTAGAGGGGCTCATCACC  
TTTGAAGCCCCTGAACTGCCGGAGGAGACGCTGATGGAGCGGGAACACACAGACACCTTACGCCATCTGA  
ATGTGATGCTGATGTTCACTGAGTGTGTGCTGGACCTGACAGCCATGAGGGGAGGAAACCCTGAGCTGTG  
CACATCTGCTGTGCTTGTACCAGATCCAGGAGAGTGTGGTGGTGGACCAGATCAGTCAGCTGAGCAAA

GACTGGGGGCGGGTGGAGCAGCTGGTGTTGTACATGAAAGCAGCACAGCTGCTTGCGGCTTCTCTGCATC  
TTGCCAAAGCCCAGATCAAGTCCGGGAAACTGAGCCCATCCACAGCTGTGAAACAAGTTGTCAAGAATCT  
GAACGAACGATATAAATTCTGCATCACCATGTGCAAGAACTTACAGAAAAGCTGAATCGATTCTTCTCT  
GACAAACAGAGGTTTATTGATGAAATCAACAGTGTGACTGCAGAGAACTCATCTATAATTGTGCTGTAG  
AAATGGTTCAGTCTGCAGCCCTGGATGAGATGTTTCAGCAGACCGAAGATATTGTTTATCGCTATCATAA  
GGCAGCCCTTCTTTTGAAGGCCTAAGTAGGATTCTACAGGACCCTGCAGATATTGAAAATGTGCATAAA  
TATAAATGTAGTATTGAGAGAAGACTGTCGGCGCTCTGCCATAGCACCGCAACCGTGTGAGCAGCAGGCT  
CATCCCGTGGACCGGTGGTGGGAACGTGAGGTGATGCCTTTGGGATTACAGCTTGAGTTCTGTCACCCCA  
TCCCCAGGAAACTGTAGCTTCTTAACTGGTGACTACCAAAGAACAAGCAGTGATTTGAAAAAGGAAAAAC  
AATCCAAAACTACATATTTGTAGGAAATCTGCCTTATTGGAGAAAATCACCCTTTCCCTTTTTCTTTGT  
AGAAGCAGGAGCAAGAGTGTTTGGCTCCCAGTTTGGACTTGGTGAATAAATGTACCTTAGAACTAGGATA  
ATCGGTACAGTTATTCTTAAAGATAATTA AAAATGAAACAAAGTGAGTGCTCGTCACTGGGTTTCATCAGA  
GCAGTGTGTGAAATTCATGTGTTTGCTGAGGTGTAAAGGTAAATGTATTCACCCCTCATCCAGGCAGTT  
TGATATTTGGAGTAAGTTTGTTTAAATCTGAGCATGCATCTTTAAACAGCTCAGGAAGAAATAGCTTAAG  
AAGAAGTGAAACATGGATCTTGGAAGAAATTTGAAATCTTCAATTTGATCCTAATATGGATACATGTTA  
ATCTTCCAAAATCTTTCATATTGCACTAATTTATTA AAAACA ACTGTGTATTGGATTTTGTAAATTA ACTA  
AGGCACAATGGACTTGTTTAAAATATTTTACTTGATTGTATACATAGACCCTTCCAGAATTCACATGTA  
ATCTCCAGTGAACTTTTAAGTGGTTAAAACTTGATTTCATGTGAACCTTGCACATTTTTTTTTTTTACT  
TCTTTATCTACACCTACAGATTTTCTCAGTAATGTTTTGTTAGCTTTTGGTTCCATTTTTTATTGTGCA  
TGCAGAATGTACATTGATGCCTGTGACCTTAGGTTTATTAAAGGCTAGGTTTATTTGGGCAGTATTAGAA  
ACAAAATCATGGATCAAGAGATACTCTTGATAATTTGAATAGGGCCAAAACAAAGTTGGTGACCTAAAGG  
CTTGTTAGTGATGTGGAGTTCCTACATGCAGTGAGTGGAAAATGAAGTTCGTTTTCTCTTAGGAAAATGG  
GCAGCTGTCTTCTGCCTAATGTGTATTTTTTCATGTTAATTCTGACAGTTCACCAAATAGCTAGTCATGGA  
GAATGCAGGCAGTTAACTTAATATCCCTCCAGGAATGGTTCCTACGTTGTGTATTACTTGGTTTCTTTTA  
CTTACCTGCTTGAATACTTGAATAAACCATTCACCAATTTTAATCCTTTTATTTTAATCCTTTTACATAA

AATAATCTGAACTCTTTGACAAATTGCACAGAGCTCTTTGGCATTAACTAATTTTAATGTACTGATAAA  
AACAAACATGGTTTTCTTTACTTTGACAAAGTAATGTAATTTTACCTTATTTATCTGTATGAAATTCC  
AGTAGTTAATTTGAACATTTATTTATATGACGTTTGTATTTTAGGTCTTTAATACAGTGTTTCTACCTC  
TCATTTGTAAGTGCATGCATTATTCTTGAACTAGGTAAACTCACTGAATTGTTGTGTAATAGCCTTTT  
TATTATTGCCTGTACAAATGTATATTAAGGTAAAATAAACTGACAAAGTGTTCCTAGGGTGTAGCTGGG  
TACATATTAAGTGGCTTGTTGAGCCAGGTACTTCCTTAGTGAGTTTAGAGACTTGGCCATGAATATCCTT  
TGTCTGCCCCAGGATTTAGATCTTGGCTACTGTCATGCAGGCTTCCAGGAACATAGACTGTTTTACCTC  
CACAACCCTATTTGTTATTAGTGATACTTTATTTTATATAATATTTTTTATTCACAGTGAAATTTCATTC  
ATGTTCTTTCAGTTATCACCTGTGTATCTCAGTTGTAGGTTTATTCTATCCTCTCCTCTTCTCTCCCA  
TTTCTTTTTTAAGACAGGATGAAACAGGTTTCAAGAGAGGGGAAGTGATTGGCCTAAAGTCAGGAACTAGGC  
AAGTGGTCAAGCCATGCTTTGTGACTTCAAGTTAATTCTTCTTGTCTTGTATATTAAGGTCTTGGGG  
TAGATGGTGTGTGTGAAACAGTGAAGTCTCAACAGCAGAAAAGAACAAAATGTAAATTCATGAATAATGG  
TTCTGGTTATACTTCCATTATCAAGGCTAATTAAGAGATTTTGCCTTGAGTATAGCAATAATAACAAAT  
GCTTTATGTTTCCCTGAGTATTTTAAATTTTATATCGTGTTTCATAGAGTGGAATGTACCAGTTCATA  
CATTCATGGGTTGACACCTGTATTCAAGCCATAACCTGGAAAATTGCTGACCAGCTATTCTGCTCTAAG  
GGTTTGCTTTAACTATAACCTCCACTGGACTATATATAGAGAGAGAGCCTATGCTGTATATAGTTGGTTT  
CCCACAGTCCCTGTCCCCTCCTTCCATTGAGAGAAGTAACTAGAGCAACAGTTGTTCTCCCTCGCTGGAG  
TGGTGAATAGGAGCCGGGAGGAGGGGACTGTTAGGGTCGGGCTGCCTCAGTCTCCACAGTAATTAAGAGG  
AAATTGAGTTGGATACAGCGGACATGAGGCCTGGAATGGGTACCCCAAACCCATGCATCTTAAGTGTCTG  
GGTCCCCACGCCCCCTTCTGCCTGCCAGGAGTACTCTGTGCAGCCATCCTGTAAGTCTTCACTCAGTCCAGAG  
AAGGATAGCATCCATCCCTCCCTCCAGCTCGCTCTCTGCTGAGGCTTTCTCCTCTCCACTCAGCATTTG  
CAACAGCTTCTCTCCTGGCACTTGTCTGGAATATCAAGTTAAAAATTACAACACCCAATTTTGATAACT  
TTAGTTGAGAGAAACAACCTCTAGTGAAGACTGATAAGTAACTTATTGCCGTTAGTCCCATGTTCTTTG  
TCTCCACCAAGAGGAATTACCAGCCCAGCAGTTCTGCCCTCACTAGAGTCCCGTCCAGGAGCTTGAGAGG  
AGAGGATTTTTAGGGCTGGATTGCCTCAGTCTGCACAGTAATAAGTTGAGTTAGACACAGTGGACATGAG

GACCTGGACTCAGATATCTGAAGAATCCTTATTATTTTTTTGTTGGCTTGTTTTGAGACAGAGTCACCCT  
GTTGCCCAGGCTGGAGTGCATTGGCGCAATCTTGGCTCACTGCAACCTCTGCCTCCCAGGTTCAAGTGAT  
TCTTCTTCCTCAGCCTCCCAGGTAGCTAGGATTACAGACATGCGCCACCACGCTCAGCTATTTTTCGTAT  
TTTTAGTGAGATGGGGTTTCACCATGTTGGTCAGGCTGGTCTTGAACACCAGCCTCAGCCTCCCCAAGT  
GCTGGGATTACAGGCATGAGCCACCGTGCCCGGCCAAAATCCTTAATGTTTTGTTTTTGGTTTTTTTT  
TTTGAGACAGTCTTGCTCTGTCACCCAGGCTGGAGTGCAGTGGCACAATCTTGGCTCACTGCAAGCTCCG  
CCTCCGGGGTTTCATGCCATTCTCCCGCCTCAGCCTCCCGAGTAGCTGGGACTACAGGCGCCTGCCACCAC  
GCCCCGGCTGATTTTTTGTATTTTTTAGTAGAGGCAGGGTTTCACCGTGTTAGGATGGTCTCGATCTCCTG  
ACCTCGTGATCCGCCCCGCTCGGCCTCCCAAAGTGCTGGGATTACAGGCGTGAGCCACCGCGCCCGGGCT  
ATCCTTAATGTTGATATTAGTGGTTAGCACATGTTTTGGAGGAGGACTTCACACTTTTTAACTATGCTC  
CCTCGTATTTTCTATAAGCAGTCTTAAATTCTTCTGGAATAAAGCAAGATTGATCAGTATTTCTCAAGG  
AGGATTATTTGGCAGGCAGTAGCTACTGCTCAGAGAACTTGGTATTGTTACATGCATCCTGGAAGTATCT  
GTGCCTATTTCTAGACGGCCTCAGACCACTTTTTTCTGAGTCTGGACCCTGAATCTGCAGCCAAGCAA  
GCTCTTGGGTCCCTCCCAAGTCTCATGTTTAGTAAAGCCCTGTGAGAATAATTTTATTGGTGGAGGAGTC  
AAGATGATACTTCCCTCACCTGCATCAGAGGAAACCACATCAGAAACAATCCACCTAGAAAAACACTGCA  
TACGGGAAAGCTGACAACTTGCCCTGAGAAATCACAGCTTTGGTGCAAGAGGTGAAGCCGAAGTGGTAAA  
AGATCAAAGTGAATTCAGAGATCAAAGTGTACTAGGGAAAGGAGCAGAGGCTGAGATCTTGCTGCCAGCG  
TGACCTCTCACAGAGTGGCCAGCAGAGGCTGTGCAGAGATGGCCAGAGCCAGGACCCAGCCCTGTGGAG  
CCCCTGGGCACATGTGGTCCCGAGTGAAGCCGTGCCTGTTGCTCTGAACAGGTGGGATCAATCTGTAGGT  
TTTTCCAATTTTACAGAGTGTGGCTCTCTTAGGTCTGCACTCCCTCTCTGCGCAGGGCGGACCTCCCT  
GGGCTCTGCAGCATGATCTCCTGTCCCAAGACAGTCGTGCTCTTGGACAGTTAGCTTCTGTCATTAGGAA  
GTGCCACATGAGCTCTTGTTTATTGGAAACCGTGTCTATGCCTCCTTGGGGTTTCTGCAACTCAATT  
TGGCAGGTAGCTTAGTGGTCCACTTGGTCTCAAATCCAGCTCCACCATGTGCAGTTGTGTGTTCTTTGG  
CAAGTTCCTCCCCTCCTCCGAATCTGTCAGTGGGGGAAGAGTGCATGTCTCACAGAGTTGAGGTGAGAAA  
TAAGTTAATGAATATGAAATCTTTGCCAGCCCCTGGCACGTGGAAGGGCTCAGCAATCCTGTATCCGT

TGTAGTGGTCATCACTCTGTGGCTCTTCACTGCTTTTGTTTTGTTTTGGGAGGGGGTGGAGAACAATTTG  
TTCTGTGTTTGTGTGGGGCAAGGCCTGTCTTCAGGGCTCTCTCCAACCACGTACGCTCTGGCTGGAGCTT  
CTGAAAGGACACAGTTCTTGCATAGAAGTTGCTTTCTCCAGCTTGCCACCAGGCAGTCTGGCTTCAGAC  
ATCTATGTTGCCCTTTTAAGTCAATTTGGCTGTTTAAGTGAATGTTTGTGTCAGTCTGATAATTGTAA  
TTCATTTGATCCTCATACCAACCCTTACTTGCCTCCTTTTACAGATGGAAAAATCAAACCTGGACAGTAA  
TTTCCACAAGGAAAAGCCCCACAGCTGGAAAGCGGTGGGAGCAGGAGGCCCACTGGGTACAGGAGTACC  
CATCTCCCCACAGGAGCCCCACACTGTCTCACCTTAGGAAGCCCAAATGCTCACTCCTTGAGTTTCTAA  
TGCATTCTTTCTGATGTACAGGAAGAGGGGAAGGAAGGAAGAGCTTTTCCATTTGGTGCTCCAATGTCTC  
CTGCTGGACCCATCTGCCTAGTGGAAGGCAGCAAAATTTCAAGAAACAGGTGAGGTTGAGCAGCTTGGTG  
CAACCCCATGGGGCCTGGAGTTGGAGCTCAACAGCAATGGATTTAGAGACCACCCTGAAACTCCCAGTA  
AAAAAGACTTGGGAGACATGTTAATAAACTCAAGCATTTGATCGACCCA

>NR\_104309.3 Homo sapiens unc-51 like kinase 3 (ULK3), transcript variant 6, non-coding RNA

GGAACCGCCGCCCCGAGCGAGGAAGCGCCGCGGGCGCAGGCGGCCGGAATGGCGGGGCCGGCTGGG  
GTCCCCGCGCCTGGACGGCTTCATCCTACCGAGCGCCTGGGCAGCGGCACGTACGCCACGGTGTACAA  
GGCCTACGCCAAGAAGGACACTCGTGAAGTGGTAGCCATAAAGTGTGTAGCCAAGAAAAGTCTGAACAAG  
GCATCGGTGGAGAACCTCCTCACGGAGATTGAGATCCTCAAGGGCATTGACATCCCCACATTGTGCAGC  
TGAAAGACTTTTCACTGGGACAGTGACAATATCTACCTCATCATGGAGTTTTGCGCAGGGGGCGACCTGTC  
TCGCTTCATCCATACCCGAGGATTCTGCCTGAGAAGGTGGCGCGTGTCTTCATGCAGCAATTAGCTAGC  
GCCCTGCAATTCCTGCATGAACGGAATATCTCTCACCTGGATCTGAAGCCACAGAACATTCTACTGAGCT  
CCTTGGAGAAGCCCCACCTAAACTGGCAGACTTTGGTTTCGCACAACACATGTCCCCGTGGGATGAGAA  
GCACGTGCTCCGTGGCTCCCCCTCTACATGGCCCCCGAGATGGTGTGCCAGCGGCAGTATGACGCCCGC  
GTGGACCTCTGGTCCATGGGGGTCATCCTGTATGGTGAGACCTCTTTCCCTGCTTCTCACCTGAGGCC

TACAGTTTCCTCAGGCAAGGCCTCTCTGGGCCACTTCTGAAGGGTTCTGATGAAAAGTACTGCTGGCCCC  
AGGGCCCCCTGCTGAGGGGCGTCAGGCCAGGCTTGACCCATTCCCTCCCAGCCTCCGCTCTGCCTCCCTTC  
CACAGAAGCCCTCTTCGGGCAGCCCCCTTTGCCTCCAGGTCGTTCTCGGAGCTGGAAGAGAAGATCCGT  
AGCAACCGGGTCATCGAGCTCCCCTTGCGGGCCCTGCTCTCCCGAGACTGCCGGGACCTACTGCAGCGGC  
TCCTGGAGCGGGACCCAGCCGTCGCATCTCCTTCCAGGACTTTTTTGCGCACCCCTGGGTGGACCTGGA  
GCACATGCCCAGTGGGGAGAGTCTGGGGCGAGCAACCGCCCTGGTGGTGCAGGCTGTGAAGAAAGACCAG  
GAGGGGGATTACAGCAGCTGCCTTATCACTCTACTGCAAGGCTCTGGACTTCTTTGTACCTGCCCTGCACT  
ATGAAGTGGATGCCCAGCGGAAGGAGGCAATTAAGGCAAAGGTGGGGCAGTACGTGTCCCGGGCTGAGGA  
GCTCAAGGCCATCGTCTCCTCTTCCAATCAGGCCCTGCTGAGGCAGGGGACCTCTGCCCCAGACCTGCTC  
AGAGAGATGGCCCGGGACAAGCCACGCCTCTAGCTGCCCTGGAAGTGGCTTCAGCTGCCATGGCCAAGG  
AGGAGGCCGCCGGCGGGGAGCAGGATGCCCTGGACCTGTACCAGCACAGCCTGGGGGAGCTACTGCTGTT  
GCTGGCAGGCGGGAGCTGCTTCACACTGAGGTTCAGAACCTCATGGCCCGAGCTGAATACTTGAAGGAGC  
AGGTCAAGATGAGGGAATCTCGCTGGGAAGCTGACACCCTGGACAAAGAGGGACTGTCGGAATCTGTTCCG  
TAGCTCTTGACCCCTCAGTGACCCTAGAAGAATGATTGGACAGATGTGAGCCATCTGGAGCAGAGGGGC  
ACTAACCAGGCTGACGCCAAGAATGAAGTGGCCCACTGCAGCCCTGGCGAGCAGGCTTCTTGGATGGAC  
AGTGCTGAGACCCCCATATCCCAGAGTCCCCAGCCTCCCTCAGGTTACTCTGCACCCACAGATGGTTTG  
ATGGCTGTGCTGTATACTGGAGGGGAGGGCAGGACTCTGGGAGAACAGCACTTCTTTTCATGAGACCTTTG  
TTACTCGGTGGTTACTGGGTCCGTGTGCCTGTCCGTTTTGGGGCATGCAGCCCTCTATCATTTTTGGCTCC  
GAGAAGAGGGCAAGGGGCCCCCGCAGGGTACTTCTGTGCTTGCCCTCGCCCTGCCAGCAGGCAGCTGTGC  
CCCTGGCCTGCCCTTCCCGGGACCCCTTATTCCAACCTCAGCTCCTCTTTGCACTGGAATGGGGCACTCCA  
ACACCCCTCAGGGACCACCCTCCCCACAGTATGCACTCAGCCCCACAGAACCCACCAGTCTTTCTGGGAA  
CTCACACCTGCCCCGCATCTTGGTACTTTAGGTTAATCCCTCAAGCATGAAAGCTGGATCTTTTGGGGTT  
TAAGAAGCCCAAGCCTTGTTCCCTGCCCTGGCCTAGGGAGCACTCAGGAGGGTTCCTTGGTCCTCATCTCT  
CCCACCTCCGTTCCCTCTGGGCCCCACACTAGCCACAGCGCGGGCCTTGTGCTGGAGTTTGAGCCTGGGA  
CAGGGAGAGGGAGGCTTGGAGACAGTCTGACCCAGTGCCTCTAGGCCACCCACTTCTAGGCCTGCCCTG

CCGCCGTGGAGCCCTGGGCAAGCTCTTCCCTTTCTGGGCCTGGGTCTCCCATCTCTCAATGGGGCT  
GATACCTTCACAGCCCACAGCATGGGCACTTATGAGGACAAAGTGAATTTAACCTGGAAAAGAATGTATT  
TGAGAGTTTCTTTTAAATAATCAGCGGGTGTGGTGATTGTAGCCCTTCTGCCCTTAAATGCTTCCTTG  
GGCAAGAGCTGTCTGTCTCCCTGCAGGAGGCTGAGTGTAAGAGTATCATTATTGTTTCTCTATTAA  
TTATTTTCTCTA

>NM\_001272075.2 Homo sapiens ubiquitin specific peptidase 10 (USP10), transcript variant 1, mRNA

GAGTGTGTATGTGCGGGCGAGAAGATGGCGGCGGCGGGGAAGCAGCGTGAGCAGCCGGAGGATCGCGGA  
GTCCAATGAAACGGGCAGCCATGGCCCTCCACAGCCCGCAGCTCCTGGGCCATGATCCCATTTTCATCA  
GATGACTTGAGAACCCAGAAGCTCTACCAGCACTGCCATTCTGTCCCGTCTTGAAACATCATGCCCTGGT  
TGCCCTCTCCTGGAATAGGGCAGTATATTTTGGAGATTTTAGCCCTGATGAATTCAATCAATTCTTGT  
GACTCCTCGATCTTCAGTTGAGCTTCTCCATACAGTGGAACAGTTCTGTGTGGCACACAGGCTGTGGAT  
AAACTACCTGATGGACAAGAATATCAGAGAATTGAGTTTGGTGTGATGAAGTCATTGAACCCAGTGACA  
CTTTGCCGAGAACCCCCAGCTACAGTATTTCAAGCACACTGAACCCTCAGGCCCTGAATTTATTCTCGG  
TTGTACAGCTTCCAAAATAACCCCTGATGGTATCACTAAAGAAGCAAGCTATGGCTCCATCGACTGCCAG  
TACCCAGGCTCTGCCCTCGCTTTGGATGGAAGTTCTAATGTGGAGGCGGAAGTTTTGGAAAATGATGGTG  
TCTCAGGTGGTCTTGGACAAAGGGAGCGTAAAAAGAAGAAAAAGCGGCCACCTGGATATTACAGCTATTT  
GAAAGATGGTGGCGATGATAGTATCTCCACAGAAGCCCTGGTCAATGGCCATGCCAATTCAGCAGTCCCG  
AACAGTGTGAGTGCAGAGGATGCAGAATTTATGGGTGACATGCCCCCGTCAGTTACGCCCAGGACTTGTA  
ACAGCCCCCAGAACTCCACAGACTCTGTGAGTGACATTGTGCCTGACAGTCCTTTCCCCGGAGCACTCGG  
CAGTGACACCAGGACTGCAGGGCAGCCAGAGGGGGGGCCCCGGGGCTGATTTTGGTCAGTCCTGCTTCCT  
GCAGAGGCTGGCAGAGACACCCTGTCAAGGACAGCTGGGGCTCAGCCCTGCGTTGGTACCGATACTACTG  
AAAACCTTGGAGTTGCTAATGGACAAATACTTGAATCCTCGGGTGAGGGCACAGCTACCAACGGGGTGGA

GTTGCACACCACGGAAAGCATAGACTTGGACCCAACCAAACCCGAGAGTGCATCACCTCCTGCTGACGGC  
ACGGGCTCTGCATCAGGCACCTTCCTGTCAGCCAGCCCAAGTCCTGGGCCAGCCTCTTTCATGATTCTA  
AGCCCTCTCCTCCTCGCCGGTGGCCTATGTGGAACTAAGTATTCCCCTCCCGCCATATCTCCCCTGGT  
TTCTGAAAAGCAGGTTGAAGTCAAAGAAGGGCTTGTTCGGTTTCAGAGGATCCTGTAGCCATAAAGATT  
GCAGAGTTGCTGGAGAATGTAACCCTAATCCATAAACCAGTGTCGTTGCAACCCCGTGGGCTGATCAATA  
AAGGGAAGTGGTGCTACATTAATGCTACACTGCAGGCATTGGTTGCTTGCCCGCCGATGTACCACCTGAT  
GAAGTTCATTCTCTGTATTCCAAAGTGCAAAGGCCTTGACGTCAACACCCATGATAGACAGCTTTGTT  
CGGCTAATGAATGAGTTCACTAATATGCCAGTACCTCCAAAACCCCGACAAGCTCTTGAGATAAAATCG  
TGAGGGATATTGCCCCTGGAGCTGCCTTTGAGCCACATATATTTACAGACTCCTGACAGTTAACAAGTC  
AAGCCTGTCTGAAAAGGGTCGACAAGAAGATGCTGAGGAATACTTAGGCTTCATTCTAAATGGACTTCAT  
GAGGAAATGTTGAACCTAAAGAAGCTTCTCTACCAAGTAATGAAAACTTACGATTTCCAACGGCCCCA  
AAAACCACTCGGTCAATGAAGAAGAGCAGGAAGAACAAGGTGAAGGAAGCGAGGATGAATGGGAACAAGT  
GGGCCCCCGGAACAAGACTTCCGTCACCCGCCAGGCGGATTTTGTTCAGACTCCAATCACCGGCATTTTT  
GGTGGACACATCAGGTCTGTGGTTTACCAGCAGAGTTCAAAGAATCTGCCACTTTGCAGCCATTTTTCA  
CGTTGCAGTTGGATATCCAGTCAGACAAGATACGCACAGTCCAGGATGCACTGGAGAGCTTGGTGGCAAG  
AGAATCTGTCCAAGGTTATACCACAAAAACCAACAAGAGGTTGAGATAAGTCGAAGAGTGAAGTCTGGAA  
AAACTCCCTCCTGTCTCGTGCTGCACCTGAAACGATTGTTTTATGAGAAGACTGGTGGGTGCCAGAAGC  
TTATCAAAAATATTGAATATCCTGTGGACTTGGAAATTAGTAAAGAACTGCTTTCTCCAGGGGTAAAAA  
TAAGAATTTTAAATGCCACCGAACCTATCGGCTCTTTGCAGTGGTCTACCATCACGGCAACAGTGCGACG  
GGCGGCCATTACACTACAGACGTCTTCCAGATCGGTCTGAATGGCTGGCTGCGCATCGATGACCAGACAG  
TCAAGGTGATCAACCAGTACCAGGTGGTGAAACCAACTGCTGAACGCACAGCCTACCTCCTGTATTACCG  
CCGAGTGGACCTGCTGTAAACCCTGTGTGCGCTGTGTGTGCGCCAGTGCCCGCTTCGTAGGACACCACC  
TCACACTCACTTCCCGCCTCTCTTTAGTGGCTCTTTAGAGAGAACTCTTTCTCCCTTTGCAAAAATGGG  
CTAGAATGAAAAGGAGATGCCTTGGGGTTCGTGCACAACACAGCTTCTGTTGACTCTAACTTCCAAATCA  
AAATCATTTGGTTGAAACAGACTGTTGCTTGATTTTAGAAAATACACAAAAACCCATATTTCTGAAATAA

TGCTGATTCCTGAGATAAGAAAGTGGATTTGATCCCCAGTCTCATTGCTTAGTAGAATAAATCCTGCACC  
AGCAACAACACTTGTAATTTGTGAAAATGAATTTTATCTTTCCTTAAAAAAGAAATTTTTTAATCCATC  
ACACTTTTCTTCCCTACCCTTTAGTTTTTGATAAATGATAAAAATGAGCCAGTTATCAAAGAAGAACTAG  
TTCTTACTTCAAAGAAAAATAAACATAAAAAATAAGTTGCTGGTTCCTAACAGGAAAAATTTTAATAAT  
TGTAAGTACGAGAGAACTGCTTACGTACACATTGCAGATCAAATATTTGGAGTTAAAATGTTAGTCTACATA  
GATGGGTGATTGTAACCTTTATTGCCATTAAAAGATTTCAAATTGCATTCATGCTTCTGTGTACACATAAT  
GAAAAATGGGCAAATAATGAAGATCTCTCCTTCAGTCTGCTCTGTTAATTCTGCTGTCTGCTCTTCTCT  
AATGCTGCGTCCCTAATTGTACACAGTTTAGTGATATCTAGGAGTATAAAGTTGTCGCCCATCAATAAAA  
ATCACAAAGTTGGTTTAAA

>NM\_003369.4 Homo sapiens UV radiation resistance associated (UVRAG), transcript variant 2, mRNA

GGTAATATGGCTCTTCCTTAGCCAGCGGCGGCAACGGCGGCAGCGGCGGCAGCGGCGGCGGCTACTGTCT  
GGGCTGAGCAGTAGTGCCTCTCGGGTGGCGGGTTTCTAGGCTGCAGGGGCTTGGTAGGTGGTGGCAAGGG  
GGCGGCGGCGGATGCCGGAAGAGTGCCCGCCCCGCGCTTGGCGGCCCCTGGATCGAGATGAGCGCCTCC  
GCGTCGGTCGGGGGCCCCGTCCCCCAGCCACCCCCGGGCCCCGGCGCTGCTCTGCCTCCCGGTTCTGCCG  
CGCGGGCCCTGCATGTGGAGCTGCCGTCTCAGCAGCGGCGTCTTCGACATCTTCGGAACATTGCTGCCCG  
GAACATTGTTAATAGAAATGGCCATCAGCTCCTTGATACCTACTTTACACTTCACTTGTGTAGTACTGAA  
AAGATATATAAAGAATTTTATAGAAGTGAAGTGATTAAGAATTCCTGAATCCACGTGGCGAAGTCTCG  
ATTTTGAATTATGCCAGACCGTCTTGATACATCTGTGTCTTGTTCGTGGTGAAGATATGGGGTGGAAA  
GGAGAACATCTACCAGCTGTTGATTGAATGGAAAGTCTGTTTGGATGGGCTGAAATACTTGGGTCAGCAG  
ATTCATGCCCCGAAACCAAAATGAAATAATTTTTGGGCTGAATGATGGATACTATGGTGCTCCATTGAAC  
ATAAGGGTTATTCAAATGCTCAGAAGACTATTCTTCTGCAGGTGGATCAGAAGTGTGTTGCAATTCTTA  
CGATGTCTTCTCTTTGCTACGGCTTCATAGAGCCCAGTGTGCAATTAAACAGACTCAGGTAAGTGTTCAG  
AAAATTGGAAAGGAAATTGAAGAAAACTAAGACTCACATCTACAAGCAATGAACTGAAAAAAAAGTG

AATGCCTGCAGTTAAAAATTTTGGTGCTTCAGAATGAACTGGAACGGCAGAAGAAAAGCTTTGGGACGGGA  
GGTGGCATTACTGCATAAGCAACAAATTGCATTACAAGACAAAGGAAGTGCATTTTCAGCTGAGCACCTC  
AAACTTCAACTCCAGAAGGAATCCCTAAATGAGCTGAGGAAGGAGTGCACTGCAAAAAGAGAACTCTTCT  
TGAAGACTAATGCTCAGTTGACAATTCGTTGCAGGCAGTTACTCTCTGAGCTTTCCTACATTTACCCTAT  
TGATTTGAATGAACATAAGGATTACTTTGTATGCGGTGTCAAGTTGCCTAATTCTGAGGACTTCCAAGCA  
AAAGATGATGGAAGCATTGCTGTTGCCCTTGTTATACTGCACATCTGGTCTCCATGATTTCTTTTTCC  
TACAAGTGCCCTCAGATATCCTATAATTCATAAGGGGTCTAGATCAACAATCAAAGACAATATCAATGA  
CAAAGTACGGAAGGAGAGAGAGTTTCCACTGTATCCAAAAGGAGGGGAGAAGTTGCAGTTTGATTAT  
GGTGTCTATCTTCTGAACAAAAATATAGCACAGCTAAGATATCAACATGGACTAGGGACTCCAGACTTGC  
GGCAAACCCTTCCCAACCTGAAAACTTCATGGAGCATGGACTAATGGTCAGGTGTGACAGACATCACAC  
CTCCAGTGCAATCCCTGTTCTAAGAGACAAAGCTCCATATTTGGGGGTGCAGATGTAGGCTTCTCTGGG  
GGGATCCCTTCACCAGACAAAGGACATCGAAAACGGGCCAGCTCTGAGAATGAGAGACTTCAGTACAAAA  
CCCCTCCTCCAGTTACAAGTACGATTAGCCCAGCCTGTGACCACCGTCCCCTCCATGGGAGAGACCGA  
GAGAAAGATAACATCTCTATCCTCCTCCTTGATACCTCCTTGGACTTCTCCAAAGAAAACAAGAAAAA  
GGAGAGGATCTAGTTGGCAGCTTAAACGGAGGCCACGCGAATGTGCACCCTAGCCAAGAACAAGGAGAAG  
CCCTCTCCGGGCACCGGGCCACAGTCAATGGCACTCTCCTACCCAGCGAGCAGGCCGGGTCCGCCAGTGT  
CCAGCTTCAGGCGAGTTCCACCCAGTCTCAGAAGCTGAGCTCTGCTGTACTGTGGAGCAAGCAGAAGAA  
ATCATCGGGCTGGAAGCCACAGTTTTCGCCTCAGGTGATCAGCTAGAAGCATTTAACTGCATCCCAGTGG  
ACAGTGCTGTGGCAGTAGAGTGTGACGAACAAGTTCTGGGAGAATTTGAAGAGTTCTCCCGAAGGATCTA  
TGCACTGAATGAAAACGTATCCAGCTTCGCCGGCCGCGCAGGAGTTCCGATAAGTGAAGTGAGCAGGTC  
AACAGTAGGACTGGGGCAGAAGCTCTGCCTAAAATGAAGTGAAAGCTGCACTTAACCCCTTTGTGATAATG  
ATGACACAAAATGAATATTAATGGAGGATATTCTCGGAAAAACAGACTTTGGGAATGAAGGAGGGACTC  
AGGATCATTGTTATCAGTGGGCCAAAGTTAGATTTTGCTTTCAAGATTTGCTTTTCGGGCCTGATGATTT  
TAAAGCAAAAATCACCTCTAGTTGAAAGAGCTTACAGCTCGAGTCACCTTTTAGCTATTTGTCTGCTTT  
TTATTTACCCTTGATGTTATCCTCAGAGGGAAGATGATAATATATAAATAATATAATGAACACACCCTT

AGTTTCTCATAAGCATTTGCCCTCACCATGGTTTATAAACTTTGGGAAAACGGAATATTAGAAATAGG  
TTTCCGCCATGTACTGAAAGGTCTGTGGCCATCTGTGAGGTAGATGAAGAAGCAGCATAGTGGTCTCCTT  
ACATCTAGGCCTAACTGTCCCTCTTCTGCCCCGGGTACCACAGTCCACCTTTAGACCCTACTGTCGCC  
CCATCTTCTCCGTGGATGGGCCATGCGTCCTGAAAACAGGACATCAGATTCAGTGGTTCTGTAACCCAGT  
AGCTGTGACGTTCCATCTTCTAACCAGCCATGGCCTTCCCCTCCTCTGCCATACCCTTAATGCGGCC  
TCAGATTAGATGAAAACTTGCTCCTGGTGGATCCCAAGGGACCCTCAAGGACCTCGAGGTTACTGCAGT  
CAGATGCCATCTCATCCCCTGTGGGGGCCAAAGTTTTTATGTGGGCAGATGCTGTGGTCAGGAACTAGGC  
ATGCTTTCTGGCAATGCACTCACCAGACAAAAATCCCTTGATGTAAATCCCATGTTAATTTATTAAATTT  
CAGTCAGAAGGTCAGCATTTACATGACAGAATGTATGTAGAGAGTTGGGGTGTCTGGTAGGCCAACTGCA  
AGGCAGTTGAGATAGTTGGATTAAGAGGCTAGACGAGACATAGAATACTATTGGTATGTGTGCAATTTCA  
TGAATATTAAATTATGTTTCGAAGTCCAGTTGTCATTCCCGCATTAGATTTCAATTTGCTGTTGCTTTAT  
ACGTTACGTACCCAAGGACATTGCCTCAGGGTTGCAAACCTTTAAAGGAAAATTTATCCATATATCCAT  
GTATTATATAGAAGAATAAAAAATTGAGTTTACTTCACCCGACCTGATTTTTTTTTACCAGCTTGGAATTT  
CCTCTGAACCTACGTCTCCATATGTCACATCATGACAGGACTAGCCTGAACAAAAGCCATGTCTATCTA  
AGCGGAGGCTGTTGACTTCATTCAGTTTGCATATTGTATATAGCAACACAAACACTTGACAGGTATATAC  
TCCAGTCGCCACATTTGTCCTGCATAACAGCTTCACTCACAGGCCTCACCGTCACTTTATTTTGTGTCCA  
AGCATTCTGGGCTCAAGTTTAATGTATAGCTACATTGTTGTTTTCCATGTAGAGAACTCACAGGATGAC  
TACATCACAAATAAACCCAACTCTCAGGCAGTCGAAAGCTTTAACTGGATCTGCAGAAGCCCATCTTCCT  
CCACATGAAGAAGTGGGGCTCCTTCACCTAGAGCAGGAGCTTCTCTGCAGTGTACTGTCTGTGCTCATT  
TTGGAGTCAGTGTGGGTGGAGACAGCATCGTGGATATGCACGTGCTGCGGGGCCCTCCAGGGAAGTAACA  
TTTACCAAAAAAAAAAGAAAAGTTCTGAAGGGCAGTGTTAGGATTGCAGAATGGAAGGTCAACCCCGTGGG  
ACTTACGATTGCCCCAGGTGCGGGATGGACTTAAATGTCACACCAAACCTCAAAGTAGGTACACTGGGTTG  
CAGGGCATCCAGCCTGGCGCTGGCACCACCAAGGAGCAGGACTCCTCATGATTACAGTGTCCATCTCAGG  
CCCACACAACCATGAGAGCCTGGACTCTGGGGTCTACCCGTAGTGCCCCCACCCTGTGCAGACTCCC  
TGTTGATCCTGGGCTTGTGGCTTTTCACCGCACGGCGGGGAGCCCTGCTCTGAATGTCATCGGGCTGC

TCAGAGCTGATTGCTAGGTGCCTACACATTTGCCTCGACCCACACAGCCCCGTGGTGATGCCTCAAAACA  
CCACTTAGGTTTGGGTTCGTTTAGTTTCGAGTTTGGGGTTTTTCATTTGAACTTGTTTGATGTCTGCAGTTT  
CTGCCATGACCTGGGTAGAACCTATGGGATTACCCGTCTCCTGGAATAACTGTTTGACGTTTTCCAAAGT  
TGTAGAGTTAGTATGGCCTCTGTTTAAAGTGGCTGGGGCCAAAATAAGGGATGAGTTATTATCTCCTACT  
AACCTTTTAGTTTTGTAAATCACTAAGAAAATTGTTTGCTTGGAAGATATAAGTTGAATTGGAACTCAT  
TACTATCTATTTCTGAACTGCTAAGAACCCTTTCAGTTTTCTTACAGCTGAGACACTTTTAAACAGCGGG  
CAAATGTTATCAAATGAATATTTGATTGTGTTTTTCTCTTCACTTCCCCTTAACCACTTTAGAAATTCC  
AGAGATTTTTTTCCCCTCAGAATATTAGTTTTGGAAGATTGTGCCCAGCTATATATTTTTTAGCAGTTCT  
AATGGTGCCCATTTATCCTGACCTAACCAGTTATTTAAATAATTTTTTAAACCACCACGAATAATAAATG  
GCATGTGAAACTGATCTGTTGGTAACTGGAAGAAAACCTCAGCATCTGTATTTATACAATAAAATTGATTA  
GTATTTA

>NM\_004781.4 Homo sapiens vesicle associated membrane protein 3 (VAMP3), mRNA

GTCCCACCCATCTCCCTGGCCTCCGGTCCCAACTTCGCTTCTCTGCTGACCCTCTCTCGTCGCCGCTGCC  
GCCGCCGCAGCTGCCAAAATGTCTACAGGTCCAAGTCTGCTGCCACTGGCAGTAATCGAAGACTTCAGCAGA  
CACAAAATCAAGTAGATGAGGTGGTGGACATAATGCGAGTTAACGTGGACAAGGTTCTGGAAAGAGACCA  
GAAGCTCTCTGAGTTAGACGACCGTGCAGACGCACTGCAGGCAGGCGCTTCTCAATTTGAAACGAGCGCA  
GCCAAGTTGAAGAGGAAAATATTGGTGGGAAGAATTGCAAGATGTGGGCAATCGGGATTACTGTTCTGGTTA  
TCTTCATCATCATCATCATCGTGTGGGTTGTCTTTCATGAAGAACCAGCGGAACCTCAAACTGCTGTTT  
AAGAAACCTCTTCAAGACTTTTGACTTAGAACCTGCTATATTATCAAGCTTACCTACTGTTATCTCTAAA  
ATTTTTTTGTGTTAATGTAAAGTTGAATTTCTAGGAAACGTGCCTTTGTTTTTTAATATGCACTCCAAA  
TTAGAAGGCCGGCCCCGTCCACATTTTGACAGTGCCTTTACAGATTTACGTATGGGCTGATGAAGAGGC  
CTTCTTAAGTTCCAGAGTGCTATAATCTAGATGTAATGTTGTCACTAATTAATTGCCATTACTCCCAGTT

AGTTACCCTTGTCATTTGGCATTATTTTCAGAACCACATTTTAAACCTTTGGGTAATCAGATTTCCAAC  
TATGCCTTCCAGAAAAAACACTACTGCCTAACACAAATCTGTGATAACAACAGGCTGTGCCTTATTTTG  
ATAATTTTCTGATTCCCTAGAGAAGAGAACCTCTACTTTTTGTAAGCACTACTGACTCTCGCTGTATTTAA  
GATGCTGGTGAAGAGCTTTTGCTCTTGCAATTAGATTGAAGATGTTTACATTGTTGTTATTGTTATGTAT  
CACTTGCTAAAAATATTGTTTTAATCAGAGATAACCTCTTTAAAAAAATTTTAAAGAACTATGGCTATG  
ACCAAAGCTTCTATTTTGCCAAAAAGTTAAATACCGATAAAATGGCCTTAAGTGTATTCTGACAGTTAA  
ATTAGAAACGTGCCAAATGGAACCTCAAGGTGCCCCCTTCAGAATTAATCATTACCTGTGTGTGAACC  
TTCTACATCTTCATAGGCCTTTCTCCTTTTGAAAGGCTGTAGACAGTGTGGCTCCCCCTTCTGATTCAGT  
ATTTTGCATGGGGGTTAGAGAAGGTTTGAGGTAGACTCTGACCGTCTCATAAAAGAGTTCTACCCAGCAG  
TTGGCAGATTATCAGCTGTGGACTCCAGCATGTTTCTGATAATTATGCAAGCAACAATTCTGTAGCCTCA  
AGTAAGACCACCTGTGAACCTGATCATTATCTGGCCCAAATATGAAGATAAACTATAACTTTGGAGTTTG  
TTTCCTATTTGTATTACATTCTGCTTCCTAAATCAGTTTTCTAAATTATGCCTGCAATTAGGCATTGGT  
CAGGGGTGAATGGCTCTTTTCACAGAGAGTAGCCAACCAGAGACCTTTGCTTTGATATCATCAACTGCAG  
AGAATGCTGTTGATGGGAATGCTGGAAGCAGAACTTTGTCATCGGAAAACTTTTCTTGATGCATGAG  
ACTCAACATCAGGATCCACAGCTTAAAGATGGGAATTCAGGTATGAAAGAAAACAGGCAAGGAGGCACTG  
AGGGAGAAAGACACAGACTTTATCGCTCTGTGGCTCATTGTTACTGGAATATTCTAAACTCTTGTTAC  
ATGCTATTATGACTTATAAAGCAGCAACAGCTGAGGCGCACCAGGACACAGCTTCCATTTCTTTAACGTC  
TGTTCCCTTAACATCGCTGAAATGATTTACTGTTGAAGAGATGCCTTGCGGTGTGGCCAGCTGTGAGGAG  
AAAGCAGCTGGCAGTGTTAGGACATTAGTCCACCTTCAGCGCAGGGTCTCTGGCCGGGTCTGACTCAGAA  
ACCTTGGTACTCGCCCCTTGCCACAGTGCCAGACCCATGTAACCCACTGGCTCCTGCATTAACCCAGA  
AATACCTCGCTTCTATCTGTGCACTTAGCTGGGAACCTTACCCACTGTAATCACCTAAATAAAGTGTAT  
AAACATGA

>NM\_005638.6 Homo sapiens vesicle associated membrane protein 7 (VAMP7), transcript variant 1, mRNA

GGCGTCCGGTCCCAGCCTCTCTGGGAGCGGGCAGTTGGCGACCCTGCACTGACCCGCGTCCCTCCGTCC  
CGAGCCCGCGCGCCCTCAGAGGGTGCCCGGACAGACTGAAGCCATGGCGATTCTTTTGTCTGTTGTTGCC  
AGGGGGACCACTATCCTTGCCAAACATGCTTGGTGTGGAGGAACTTCCTGGAGGTGACAGAGCAGATTC  
TGGCTAAGATACCTTCTGAAAATAACAACTAACGTACTCACATGGCAATTATTTGTTTCATTACATCTG  
CCAAGACAGGATTGTATATCTTTGTATCACTGATGATGATTTTGAACGTTCCCGAGCCTTTAATTTCTG  
AATGAGATAAAGAAGAGGTTCCAGACTACTTACGGTTCAAGAGCACAGACAGCACTTCCATATGCCATGA  
ATAGCGAGTTCTCAAGTGTCTTAGCTGCACAGCTGAAGCATCACTCTGAGAATAAGGGCCTAGACAAAGT  
GATGGAGACTCAAGCCCAAGTGGATGAACTGAAAGGAATCATGGTCAGAAACATAGATCTGGTAGCTCAG  
CGAGGAGAAAAGATTGGAATTATTGATTGACAAAACAGAAAATCTTGTGGATTCTTCTGTCACCTTCAAAA  
CTACCAGCAGAAATCTTGCTCGAGCCATGTGTATGAAGAACCTCAAGCTCACTATTATCATCATCATCGT  
ATCAATTGTGTTTCATCTATATCATTGTTTCACCTCTCTGTGGTGGATTTACATGGCCAAGCTGTGTGAAG  
AAATAGGAAAGAAGAAGTTACCATTAACCAAGGATATGAGAGAACAAAGGAGTTAAAAGCAATCCATGTGA  
CTCAAGCCTTTCACATACTGACAGATGGTATCTGCCAGTCTCTTCAACCCTCTTCTCACTTTTTAAATC  
TTGTTCCATGCCTCCAGGTTTATCTTTGTCTTATCTACCAGTTTATTCCTGTGAACTTCAGATTGAACCA  
TTCATTGCAGCAGTAGCCTTAAAAAGGCTTTTGTTATTTCTTTGGTTTGTTAACTAGTGTCATCTATTT  
AGAGAAACATTTTTGTTTTAATTGCTCAAAGCTGTCGCCGCTAGTCTTATGAGCTATCTACTAAAACTA  
TGGAGAACTTTGTATGTGCACACAAAAGTATTCAAGAGACAGTATTGCTAACATCTCATCTTAATGTCT  
TTTGTTATTGAGAAGTTTTAGGTGCTTCAAAACAATATAAATGGATAATAGTTGTTATTTGGGGAATTGT  
AATGATGTTGGTGCTGCTTCCTTCTAAGAGCTCAGACAAGTAAAGTATGAAACATTCTTATTTAGTTAG  
ATGGGGAACATTTTGCTAGCCCATTAGAAGCACACAGAATTATCCTTGTCCTCCTAATATTGACTTTCAG  
GAATAAAGTTCAGTGTGCTGATCATTACAATACAGTGGATAGCTTGATATCTTCTGTTTTCCATTGCA  
GTTGATTTGAGAAGATGAAGGTTTAAATATTGTTGAAAGTTGCAGTTTTTTAAATGTGTTCTTTTTCTT  
CTGTGAATATTTAGGGCAATCGTGTGCTAATAGAATATGTAGTAGAGGGGTGGGGAGGTAAATTCCTC  
TGAATTGCCAAAGAAAAAGAAGGGAACCAAGTGGATATGCTAGCATTTTAGCTGTGCAAAGGGAGGTAG

TGTGGGAAAAGTGTTCATTCTGGGAAAAGCCCAAACCGAATACGGTCAGCAGTCAACTCCAGGGTTTG  
GGCTTGATTCCTGTTGAATAATAGTTTTGAGCATTCTTTGTGGTTAAATAAATTCTTAAATCTGCCTAGT  
TTTGATGAATTCTTTGTGAAACTTGAAAGAGAATAGACAGTATGACATATAGAATTAATACAAAACAGT  
TTAACAACCATTAACTGCAGTGTAAGAAAATTGGACTGTAATCATATCGCTACTGGCATCTGTTATCTA  
GTATGCATTTCTGGTGTGTATCTGAAAGGAAGACATTTTCTACCCTAGATCCAATTGCATTTATTTATCA  
ATAAGTGCCATTAAATTGAAATTATATTACATTTTACACTTTCTCAATGAATGAACAAATTAGTCTGTAG  
AATCTAGCCACCTGTTTAGCCTAGTCATGTGCCTTGAACATATATGTGTCCATAATCTGGCTCATGGTA  
CCTGTTCTTCTATCCAAACCTTTCAATTCATGCTACCTGATTCATTTATTTGACATAGATCTTAGGCCCA  
CTTGAACCTCTTTTCTGTTTATCTAGCATAGCACAAACGTTTTTCCAGTCTTCTTTATCAACACTAATGC  
CTCTTAATTGCATCAGTATTTCTATTGGAAAATACATCTGTTCCAGAAAAACATTTGGCATTCTGAAT  
AATTTCCAAATGTTTTTAATCCAAAGAAAAAGGTTTAAAGCTTATTTCCCTTTCTTATACACACCTGAAT  
AAAATTGATGTGCATGTTTTAGGGATCAATTACCTAACTGTTCTTGGTCTATTTATGTATAAGAATGCT  
TTTTAAAGCACATGTCTCATTTTAAATGACGCACAACTGAAGATGTTAATAAAATTTAAGAGTAATACA  
ATGA

>NM\_001025366.3 Homo sapiens vascular endothelial growth factor A (VEGFA), transcript variant 1,  
mRNA

GCGGAGGCTTGGGGCAGCCGGGTAGCTCGGAGGTCGTGGCGCTGGGGGCTAGCACCAGCGCTCTGTCGGG  
AGGCGCAGCGGTTAGGTGGACCGGTCAGCGGACTACCGGCCAGGGCGCTCGGTGCTGGAATTTGATATT  
CATTGATCCGGGTTTTATCCCTCTTCTTTTTCTTAAACATTTTTTTTTAAACTGTATTGTTTCTCGTT  
TTAATTTATTTTTGCTTGCCATTCCCCACTTGAATCGGGCCGACGGCTTGGGGAGATTGCTCTACTTCCC  
CAAATCACTGTGGATTTTGAAACCAGCAGAAAGAGGAAAGAGGTAGCAAGAGCTCCAGAGAGAAGTCGA  
GGAAGAGAGAGACGGGGTCAGAGAGAGCGCGCGGGCGTGCGAGCAGCGAAAGCGACAGGGGCAAAGTGAG  
TGACCTGCTTTTGGGGGTGACCGCCGGAGCGCGGCGTGAGCCCTCCCCCTTGGGATCCCGCAGCTGACCA

GTTCGCGCTGACGGACAGACAGACAGACACCGCCCCAGCCCCAGCTACCACCTCCTCCCCGGCCGGCGGC  
GGACAGTGGACGCGGCGGCGAGCCGCGGGCAGGGGCCGAGCCCGCGCCCGAGGCGGGGTGGAGGGGGT  
CGGGGCTCGCGGCGTCGCACTGAACTTTTCGTCCAATTCTGGGCTGTTCTCGCTTCGGAGGAGCCGTG  
GTCCGCGCGGGGGAAGCCGAGCCGAGCGGAGCCGCGAGAAGTGCTAGCTCGGGCCGGGAGGAGCCGCAGC  
CGGAGGAGGGGGAGGAGGAAGAAGAGAAGGAAGAGGAGAGGGGGCCGCACTGGCGACTCGGCGCTCGGAA  
GCCGGGCTCATGGACGGGTGAGGCGGCGGTGTGCGCAGACAGTGCTCCAGCCGCGCGCGCTCCCCAGGCC  
CTGGCCCGGGCCTCGGGCCGGGAGGAAGAGTAGCTCGCCGAGGCGCCGAGGAGAGCGGGCCGCCCCACA  
GCCCCAGCCGGAGAGGGAGCGCGAGCCGCGCCGGCCCCGGTCGGGCCTCCGAAACCATGAACTTTCTGCT  
GTCTTGGGTGCATTGGAGCCTTGCCTTGCTGCTCTACCTCCACCATGCCAAGTGGTCCCAGGCTGCACCC  
ATGGCAGAAGGAGGAGGGCAGAATCATCACGAAGTGGTGAAGTTCATGGATGTCTATCAGCGCAGCTACT  
GCCATCCAATCGAGACCCTGGTGGACATCTTCAGGAGTACCCTGATGAGATCGAGTACATCTTCAAGCC  
ATCCTGTGTGCCCTGATGCGATGCGGGGGCTGCTGCAATGACGAGGGCCTGGAGTGTGTGCCACTGAG  
GAGTCCAACATCACCATGCAGATTATGCGGATCAAACCTCACCAAGGCCAGCACATAGGAGAGATGAGCT  
TCCTACAGCACAAACAATGTGAATGCAGACCAAAGAAAGATAGAGCAAGACAAGAAAAAATCAGTTG  
AGGAAAGGGAAAGGGGCAAAAACGAAAGCGCAAGAAATCCCGGTATAAGTCCTGGAGCGTGTACGTTGGT  
GCCCCTGCTGTCTAATGCCCTGGAGCCTCCCTGGCCCCCATCCCTGTGGGCCTTGCTCAGAGCGGAGAA  
AGCATTTGTTTGTACAAGATCCGCAGACGTGTAAATGTTCTGCAAAAACACAGACTCGCGTTGCAAGGC  
GAGGCAGCTTGAGTTAAACGAACGTACTTGCAGATGTGACAAGCCGAGGCGGTGAGCCGGGCAGGAGGAA  
GGAGCCTCCCTCAGGGTTTCGGGAACCAGATCTCTACCAGGAAAGACTGATACAGAACGATCGATACAG  
AAACCACGCTGCCGCCACCACACCATCACCATCGACAGAACAGTCCTTAATCCAGAAACCTGAAATGAAG  
GAAGAGGAGACTCTGCGCAGAGCACTTTGGGTCCGGAGGGCGAGACTCCGGCGGAAGCATTCCCGGGCGG  
GTGACCCAGCACGGTCCCTCTTGAATTGGATTGCCATTTATTTTCTTGCTGCTAAATCACCGAGCC  
CGGAAGATTAGAGAGTTTTATTTCTGGGATTCTGTAGACACACCCACCCACATACATACATTTATATAT  
ATATATATTATATATATATAAAATAAATATCTCTATTTTATATATATAAAATATATATATTCTTTTTT  
AAATTAACAGTGCTAATGTTATTGGTGTCTTCACTGGATGTATTTGACTGCTGTGGACTTGAGTTGGGAG

GGGAATGTTCCCACTCAGATCCTGACAGGGAAGAGGAGGAGATGAGAGACTCTGGCATGATCTTTTTTTT  
GTCCCACTTGGTGGGGCCAGGGTCCTCTCCCCTGCCCAGGAATGTGCAAGGCCAGGGCATGGGGGCAAAT  
ATGACCCAGTTTTGGGAACACCGACAAACCCAGCCCTGGCGCTGAGCCTCTCTACCCCAGGTCAGACGGA  
CAGAAAGACAGATCACAGGTACAGGGATGAGGACACCGGCTCTGACCAGGAGTTTGGGGAGCTTCAGGAC  
ATTGCTGTGCTTTGGGGATTCCCTCCACATGCTGCACGCGCATCTCGCCCCAGGGGCACTGCCTGGAAG  
ATTCAGGAGCCTGGGCGGCCTTCGCTTACTCTCACCTGCTTCTGAGTTGCCCAGGAGACCACTGGCAGAT  
GTCCCGGCGAAGAGAAGAGACACATTGTTGGAAGAAGCAGCCCATGACAGCTCCCCTTCCTGGGACTCGC  
CCTCATCCTCTTCCTGCTCCCCTTCCTGGGGTGCAGCCTAAAAGGACCTATGTCCTCACACCATTGAAAC  
CACTAGTTCTGTCCCCCAGGAGACCTGGTTGTGTGTGTGTGAGTGGTTGACCTTCCTCCATCCCCTGGT  
CCTTCCCTTCCTTCCCAGGGCACAGAGAGACAGGGCAGGATCCACGTGCCCATTTGTGGAGGCAGAGAAA  
AGAGAAAGTGTTTTATATACGGTACTTATTTAATATCCCTTTTTAATTAGAAATTAACAGTTAATTTA  
ATTAAAGAGTAGGGTTTTTTTTTTCAGTATTCTTGGTTAATATTTAATTTCAACTATTTATGAGATGTATCT  
TTTGCTCTCTCTTGCTCTCTTATTTGTACCGTTTTTGTATATAAAATTCATGTTTCCAATCTCTCTCTC  
CCTGATCGGTGACAGTCACTAGCTTATCTTGAACAGATATTTAATTTTGCTAACACTCAGCTCTGCCCTC  
CCCGATCCCCTGGCTCCCCAGCACACATTCCCTTGAAATAAGGTTTCAATATACATCTACATACTATATA  
TATATTTGGCAACTTGATTTGTGTGTATATATATATATATATGTTTATGTATATATGTGATTCTGATAA  
AATAGACATTGCTATTCTGTTTTTATATGTAAAAACAACAAAGAAAAAATAGAGAATTCTACATACTA  
AATCTCTCTCCTTTTTTAATTTAATATTTGTTATCATTTATTTATTGGTGCTACTGTTTATCCGTAATA  
ATTGTGGGGAAAAGATATTAACATCACGTCTTTGTCTCTAGTGCAGTTTTTCGAGATATTCCGTAGTACA  
TATTTATTTTTAAACAACGACAAAGAAATACAGATATATCTTAAAAAAAAAAAAAGCATTTTGTATTAAAG  
AATTAATTCTGATCTCAAA

>NM\_030938.5 Homo sapiens vacuole membrane protein 1 (VMP1), transcript variant 1, mRNA

GGGTTCCGGTTGTCTGGAGCCCAGCGGCGGGTGTGAGAGTCCGTAAGGAGCAGCTTCCAGGATCCTGAGA  
TCCGGAGCAGCCGGGGTCGGAGCGGCTCCTCAAGAGTTACTGATCTATGAAATGGCAGAGAATGGAAAAA  
ATTGTGACCAGAGACGTGTAGCAATGAACAAGGAACATCATAATGGAAATTCACAGACCCCTCTTCAGT  
GAATGAAAAGAAGAGGAGGGAGCGGGAAGAAAGGCAGAATATTGTCCTGTGGAGACAGCCGCTCATTACC  
TTGCAGTATTTTTCTCTGGAAATCCTTGTAATCTTGAAGGAATGGACCTCAAATTATGGCATCGTCAAA  
GCATTGTGGTGTCTTTTTACTGCTGCTTGCTGTGCTTATAGCTACGTATTATGTTGAAGGAGTGCATCA  
ACAGTATGTGCAACGTATAGAGAAACAGTTTCTTTGTATGCCTACTGGATAGGCTTAGGAATTTGTCT  
TCTGTTGGGCTTGGAACAGGGCTGCACACCTTTCTGCTTTATCTGGGTCCACATATAGCCTCAGTTACAT  
TAGCTGCTTATGAATGCAATTCAGTTAATTTTCCCGAACCACCCTATCCTGATCAGATTATTTGTCCAGA  
TGAAGAGGGCACTGAAGGAACCATTCTTTGTGGAGTATCATCTCAAAGTTAGGATTGAAGCCTGCATG  
TGGGGTATCGGTACAGCAATCGGAGAGCTGCCTCCATATTTATGGCCAGAGCAGCTCGCCTCTCAGGTG  
CTGAACCAGATGATGAAGAGTATCAGGAATTTGAAGAGATGCTGGAACATGCAGAGTCTGCACAAGACTT  
TGCCTCCCGGGCCAACTGGCAGTTCAAAACTAGTACAGAAAGTTGGATTTTTTGAATTTTGGCCTGT  
GCTTCAATTCCAAATCCTTTATTTGATCTGGCTGGAATAACGTGTGGACACTTTCTGGTACCTTTTTGGA  
CCTTCTTTGGTGCAACCCTAATTGGAAGCAATAATAAAAAATGCATATCCAGAAAATTTTTGTTATAAT  
AACATTCAGCAAGCACATAGTGGAGCAAATGGTGGCTTTCATTGGTGCTGTCCCCGGCATAGGTCCATCT  
CTGCAGAAGCCATTTAGGAGTACCTGGAGGCTCAACGGCAGAAGCTTCACCACAAAAGCGAAATGGGCA  
CACCACAGGGAGAAAACTGGTTGTCCTGGATGTTTGAAAAGTTGGTCGTTGTCATGGTGTGTTACTTCAT  
CCTATCTATCATTAATCCATGGCACAAAGTTATGCCAAACGAATCCAGCAGCGGTTGAACTCAGAGGAG  
AAAATAAATAAGTAGAGAAAGTTTTAACTGCAGAAATTGGAGTGGATGGGTTCTGCCTTAAATTGGGA  
GGACTCCAAGCCGGAAGGAAAATCCCTTTTCCAACCTGTATCAATTTTTACAACTTTTTCTGAAAG  
CAGTTTAGTCCATACTTTGCACTGACATACTTTTCTTCTGTGCTAAGGTAAGGTATCCACCCTCGATG  
CAATCCACCTTGTGTTTTCTTAGGGTGGAATGTGATGTTGAGCAGCAAACCTTGCAACAGACTGGCCTTCT  
GTTTGTTACTTTCAAAGGCCACATGATACAATTAGAGAATTCCACCGCACAAAAAAGTTCCTAAGT  
ATGTTAAATATGTCAAGCTTTTTAGGCTTGTCACAAATGATTGCTTTGTTTTCTAAGTCATCAAAATGT

ATATAAATTATCTAGATTGGATAACAGTCTTGCATGTTTATCATGTTACAATTTAATATTCCATCCTGCC  
CAACCCTTCCTCTCCCATCCTCAAAAAAGGGCCATTTTATGATGCATTGCACACCCTCTGGGGAAATTGA  
TCTTTAAATTTTGAGACAGTATAAGGAAAATCTGGTTGGTGTCTTACAAGTGAGCTGACACCATTTTTTA  
TTCTGTGTATTTAGAATGAAGTCTTGAAAAAACTTTATAAAGACATCTTTAATCATTCCAAAAATTGTGT  
CCGTTTTCTTGAGCGTTTTGATTTTTTACTTTTAGCTTATACCAGCTGAATGGCAGCCTTGCCTAATCCA  
CCTACAACAAGAATTTCTTAAGCTTTCTTTTATTTGCATGAGAGAGCCACTACCAAGGCATGTTTTGTTA  
TGCTGAAACTGGGCTGCTGCATACTGCTAAATGGCACCTCTGGGATTGGCCTACCTGGGGATTCTTGGT  
TTGTGAAAACAGGAGAGGAGAAATATCTCATACAAGTGAAAGGATACTGGAGAGAGAAATTACCCATTTT  
TAAAAAAAACCACACTCTGTCGTATCTGTGTTAATGTTTTCTAGCATGTACTCTGGTTTCAACAGACAC  
AAATTTATATGTTAACCCAGTTTTCTTGCCGTTCTGTAAGTGTTTTATTCTTAGTGTGATTTTTTTCCAT  
TGGGATGTTTTTGATTGAACTTGTTCATTTTGTTTTGCTTGGGAGGAAAATAAACAATTTTACTTTTTTC  
CTTAGGAGCATTATGAGCATTATGTCAGAATAGAATAGAATTGGGGTTCGATCTTAACAGGCCAGAAAT  
GCCTGGGTTTTTTTGGTTTGTTTTGTTTTGTTTTTTATCAAATCCTGCCTGACTGTCTGCTTGTTTT  
GCCTACCATCGTGACATCTCCATGGCTGTACCACCTTGTCGGGTAGCTTATCAGACTGATGTTGACTGTT  
GAATCTCATGGCAACACCAGTCGATGGGCTGTCTGACATTTTGGTATCTTTCATCTGACCATCCATATCC  
AATGTTCTCATTTAAACATTACCCAGCATCATTGTTTATAATCAGAACTCTGGTCCTTCTGTCTGGTGG  
CACTTAGAGTCTTTTGCCATAATGCAGCAGTATGGAGGGAGGATTTTATGGAGAAATGGGGATAGTCT  
TCATGACCACAAATAAATAAAGGAAAACTAAGCTGCATTGTGGGTTTTGAAAAGGTTATTATACTTCTTA  
ACAATTCTTTTTTCAGGGACTTTTCTAGCTGTATGACTGTTACTTGACCTTCTTGAAAAGCATTCCCA  
AAATGCTCTATTTTAGATAGATTAAACATTAACCAACATAATTTTTTTTAGATCGAGTCAGCATAAATTC  
TAAGTCAGCCTCTAGTCGTGGTTCATCTCTTTCACCTGCATTTATTTGGTGTGTCTGAAGAAAGGAA  
AGAGGAAAGCAAATACGAATTGTACTATTTGTACCAAATCTTGGGATTCATTGGCAAATAATTCAGTG  
TGGTGTATTATTAAATAGAAAAAAAATTTTGTTCCTAGGTTGAAGGTCTAATTGATACGTTTGACTT  
ATGATGACCATTTATGCACTTTCAAATGAATTTGCTTTCAAAATAAATGAAGAGCAGCTGTCCTTCTTTC  
CTCTTTTAAGTGTTCAAGCTGTGGCATGCTCAGAGGTTCTGCTGGATTCCAGCTGGAGCGGTGTGATACC

CTTCTTTTTCAGCTGTTTCGTGCCTTCCTTTCTTGTATCCACCAAAGTGGAGACAAATACATGATCTCAAA  
GATACACAGTACCTACTTAATTCCAGCTGATGGGAGACCAAAGAATTTGCAAGTGGATGGTTTGGTATCA  
CTGTAAATAAAAAGAGGGCCTGGGAATTCTTGCGATTCCATCTCTA

>NM\_014991.6 Homo sapiens WD repeat and FYVE domain containing 3 (WDFY3), mRNA

AGACAGCCAGCGGGAGGTGGAGAAAGCAGGAGGAGGAGGAGGATTAAAGATGGCCACCAACAGCTGCGGG  
AAACGGCAACAACCCCTCACTTCCGGGATGGTCCCTGCGGGTCGGCCCGCCTTGATGGAGAGAAGAAA  
CCCGAGGAGCGCCGAGGCTGAGGCGGCGGCGGCGGGGACCCAGCGAGGACGAGGACGCGGCGGAGCAGGG  
ACGGGGGCAGGAGAAGGGAAAGGCGGCGGCGTCTGCTGCCCCTGCTGCCTAGCACCGCTGCCTGGCCCGGC  
GGACCGGTTCCCATACCTCGCGGCCGCAGAATCGAGCTCGGGCCCCGGCCCCGGCCCCGCGGCGCGGGGC  
TCCCGGGCCCCGCGCGGACGTCGCGCCGGTCGCCCCTTCCCGTAGCCCGTGCGCCCTCGGCGCGGAGC  
CCCGGCCCGCGCGGTCCCGTCTCCTGGGCCTGTCCCGCCGCGCCCTCCGCCGGCCCTCAGGTATAATA  
CTTCTCCACGTCTGCTTCAGGAAGAAAGTGCCTGCCATTCTTATCATTTCTAAGCAGGTTTCATGCCAGCC  
CAGAACAGAGAATCAGCTGGAGCCCAGATTTCAAGTTTTGAGTAAAATACCTTCAAGCGAATGGGCCCTA  
TTGTGCTCACACATTCAGAACCTGTTACCCAAGGAATTCCTAAAGAATTAGAAGTGCCTCTACCAACC  
AGCCAAGATGAACATGGTGAAGAGGATCATGGGGCGGCCGAGGCAGGAGGAGTGCAGCCACAAGACAAC  
GCCTTAGGACTGATGCACCTCCGCCGGCTCTTACGGAGTTGTGCCATCCTCCCCGGCACATGACTCAGA  
AGGAACAAGAAGAGAAACTGTATATGATGCTGCCAGTGTTTAACAGGGTTTTTGAAATGCTCCGCCGAA  
TACAATGACAGAAAAATTTTCTGATCTTCTGCAGTTCACAACACAAGTCTCACGACTAATGGTGACAGAA  
ATTCGAAGGAGAGCATCAAACAAATCCACAGAGGCTGCAAGTCGGGCCATAGTTCAGTTCCTAGAGATTA  
ATCAGAGTGAAGAAGCCAGTAGAGGCTGGATGCTTCTAACGACAATTAATTTGTTAGCTTCCTCTGGTCA  
GAAAACCGTGGACTIONGATGACAACAATGTCAGTGCCTTCCACCCTGGTTAAATGTTTATATCTGTTTTT  
GACCTTCCACATGTGCCTGAGGCAGTTGGAGGTGCACAGAATGAGCTACCTCTAGCAGAACGTCGAGGAC

TACTCCAGAAAGTTTTGTACAGATCTTAGTGAAACTGTGCAGTTTTGTTCCCTGCGGAGGAGCTGGC  
TCAGAAAGATGATCTCCAGCTTCTATTCAGTGCAATAACCTCTTGGTGCCCTCCCTATAACCTGCCTTGG  
AGAAAGAGTGCTGGAGAAGTCCTCATGACCATATCTCGTCATGGTCTTAGTGCAATGTAGTGAAGTATA  
TTCATGAGAAAGAGTGTTTATCTACATGTGTTTCTGAGCAATATGCAGCAATCAGATGACCTGTCTCCCTAGA  
AATTGTCGAAATGTTTGCTGGGCTTTCTTGTTCCTCAAAGATTCCAGCGATGTTCCCAAACACTTCTG  
GATGATTTTCGGATATGGCAAGGATATAATTTCTTTGTGATCTCTTGCTTAGATTGGAACAAGCAAAAG  
AGGCAGAATCCAAAGATGCCTTGAAAGATCTGGTTAATCTGATAACTTCCCTAACACATATGGTGTGAG  
TGAATAAAACCAGCTGGTATTACCACAGGGGCACCTTTTTATTGCCTGGATTTGCAGTACCTCAGCCT  
GCAGGCAAAGGTCACAGTGTGAGAAACGTCCAGGCCTTGCAGTTCTTCAGAATGCATTTTTAAAGCAA  
AAACCAGCTTCCTTGCCCAAATCATCCTTGATGCTATCACAAATATTTACATGGCTGACAATGCCAATTA  
CTTCATCCTAGAGTCACAGCACACATTGTCACAGTTTGCAGAGAAGATTCTAAACTCCAGAAGTACAA  
AACAAATACTTTGAGATGCTGGAGTTTGTTGTTTTAGCTTAAATTATATACCTGTAAAGAACTTATTA  
GTGTCAGTATCCTCTTAAATCTAGCTCTTCTTATCACTGTAGCATTATTGCAATGAAAACACTTCTTAA  
GTTTACAAGACATGACTACATATTTAAAGACGTGTTTCAGGGAGGTTGGCCTTTTGGAGGTCATGGTAAAC  
CTTTTGCATAAATATGCTGCCCTGTTGAAGGATCCAACTCAGGCACTAAATGAACAAGGGGACTCAAGAA  
ATAATAGTTCAGTTGAAGACCAAAAACACCTGGCTTTATTGGTTATGGAGACCTTGACAGTGCTTCTTCA  
AGGATCAAACACAAATGCAGGAATTTTCGAGAATTTGGAGGTGCAAGATGTGCACATAATATAGTAAAG  
TACCCTCAATGCCGGCAGCATGCCTTGATGACTATCCAACAGCTGGTGTCTCCCCAAATGGGGACGATG  
ACATGGGCACTCTCCTGGGGCTAATGCATTCAGCCCCACCGACGGAATTGCAGTTGAAGACTGATATTTT  
AAGGGCCCTCCTGTGCGTCCTTCGAGAAAGCCATCGTTCAAGAACAGTTTTTAGGAAAGTTGGAGGATTT  
GTGTACATTACATCCTTGCTCGTTGCTATGGAAAGATCTTTGAGCTGTCCACCCAAGAATGGCTGGGAGA  
AAGTGAACCAGAATCAAGTGTTTGAACCTCTTCACACTGTGTTCTGCACGTTGACTGCAGCAATGCGCTA  
TGAGCCAGCCAACCTCTCATTTCTTCAAAACAGAGATTCAGTATGAGAAGTTGGCAGATGCTGTTGATTT  
CTTGGCTGCTTCTCAGACCTAAGAAAAATAAGCGCCATGAATGTCTTCCCTCAAATACACAGCCATTTT  
AAAGACTTTTAGAGGAAGATGTAATCTCAATAGAATCAGTGTACCCACGTTACGGCACTGCAGTAACT

TTTTATTTATCTTTACAAAGTAGCCACAGATTCTTTTGACAGTCGTGCAGAACAGATCCCTCCTTGCCTG  
ACAAGTGAGTCTTCTCTCCCCTCTCCTTGGGGTACACCAGCTTTGTCCAGGAAAAGGCATGCATATCATT  
CTGTTTCAACTCCCCCTGTTTACCCTCCTAAAAATGTTGCCGACCTGAAACTACATGTGACAACTTCATC  
TCTGCAGAGTTCTGATGCAGTCATCATTATCCTGGAGCCATGCTTGCCATGCTGGACCTACTGGCCTCT  
GTTGGGTCAGTGACACAGCCAGAACATGCTTTGGATCTTCAACTGCCGTGGCAAATATTTTACAATCCC  
TGGTGCACACAGAAAGGAACCAGCAAGTCATGTGTGAAGCTGGTCTTCATGCACGACTGCTGCAGAGGTG  
CAGTGCTGCATTGGCTGATGAGGACCACTCACTGCACCCGCCCTGCAGCGGATGTTTGAACGATTAGCC  
TCTCAGGCTCTGGAACCCATGGTGTGAGGGAGTTTTTACGTTTGGCAAGTCCTTTAAATTGTGGTGCCT  
GGGACAAAAAAGTCTAAAAACAATATAGGGTCCACAAACCAAGTTCAGTGAGTTATGAACCAGAAATGAG  
AAGTAGTATGATCACATCTCTGGAAGGTCTGGGTACTGATAATGTTTTTAGCTTACATGAAGATAACCAT  
TACCGGATAAGCAAGAGCCTGGTAAAATCTGCGGAAGGAAGTACTGTACCCCTGACCAGGGTGAAGTGTC  
TGGTCTCCATGACAACCCACATGACATCAGACTTCATGGGTCATCAGTTACTCCAGCTTTTGTGAATT  
TGACACATCACTTGAAGGGTTTGGATGTCTTTTTTGGCCAGTTTGGCCCCTCATAATGCTCCTACAAAT  
AATACCGTCACAACAGGTCTTATTGATGGGGCTGTGGTCAGTGGCATTGGTTCTGGTGAAAGATTCTTCC  
CTCCTCCCTCCGGCTTAAGTTACTCTAGCTGGTTTTGTATTGAACATTTTAGTTCTCCTCCAAATAACCA  
CCCTGTCAGACTTCTTACTGTTGTGCGCCGAGCAAATTCTTCTGAGCAACATTACGTGTGCCTTGCAATA  
GTTCTATCAGCAAAAGACCGATCTCTGATTGTTTCCACCAAAGAGGAACTCCTCCAAAATTATGTTGATG  
ATTTTAGTGAAGAGTCCTCATTTTATGAAATTCTCCCATGCTGTGCTCGCTTTCGATGTGGAGAGCTTAT  
CATTGAGGGACAGTGGCATCATTTGGTCTGGTAATGAGCAAAGGCATGTTGAAAAACAGTACTGCAGCC  
CTTTATATTGATGGACAGCTTGTTAACTGTAAAGCTTCATTATGTCCACAGTACTCCAGGGGGTTCAG  
GTTTCGGCAAATCCACAGTGGTGAGCACGGTCTATGCCTACATTGGTACTCCACCTGCCAACGCCAAAT  
TGCCTCATTGGTTTGGCGCCTGGGACCCACACATTTCTAGAAGAAGTTTTACCTTCTCAAATGTTACT  
ACCATTTATGAACTTGGACCAAATTATGTTGGAAGCTTTCAGGCTGTATGTATGCCATGTAAAGATGCAA  
AATCCGAAGGGGTGGTGCCATCCCCTGTGTCATTAGTACCAGAGGAGAAAGTGTCATTTGGCCTCTATGC  
ACTCTCTGTGTCGTCTCTAACAGTGGCAAGAATCCGGAAAGTGATAACAAATTGGATAGCAAAGCCATT

GCTAAGCAGTTAGGCATTTCTCACATGAGAATGCCACTCCTGTGAAGTTGATACACAATTCAGCAGGAC  
ATCTTAATGGATCTGCACGGACAATTGGGGCCGCTCTGATTGGATACTTGGGAGTAAGAACATTTGTCCC  
TAAGCCTGTTGCCACTACTTTGCAGTACGTTGGTGGAGCTGCAGCCATCCTGGGCCTGGTGGCCATGGCC  
TCTGATGTGGAAGGGTTATATGCAGCAGTCAAGGCCCTGGTTTGTGTGGTCAAGAGTAACCCACTAGCCA  
GCAAAGAAATGGAAAGAATCAAGGGCTACCAGTTGCTGGCAATGTTGCTTAAGAAGAAACGTTCCCTTCT  
TAACAGCCACATCCTCCATCTAACTTTTTCTTTGGTGGGAACTGTTGATAGTGGACATGAGACCTCCATT  
ATTCCAAATTCAACTGCTTTCCAGGACCTCCTCTGTGATTTGAAGTCTGGCTCCATGCACCATATGAAC  
TTCATCTTTCCTTATTTGAACACTTTATTGAACTGCTCACAGAGTCCAGTGAAGCCTCAAAGAATGCCAA  
ATTAATGAGAGAATTCCAGTTAATCCCAAAGCTGCTCCTGACTCTTCGAGATATGTCTTTATCCCAGCCT  
ACTATTGCTGCTATTAGTAATGTCCTGAGCTTCTTACTGCAAGGTTTTCTAGCAGCAATGATCTGCTCA  
GATTTGGGCAGTTTATTTCTTCTACTTTGCCAACCTTTGCGGTTTGTGAGAAATTTGTAGTAATGGAAAT  
AAATAATGAAGAGAAGCTTGACACTGGAAGTGAAGAGGAGTTTGGAGGTCTTGTATCAGCTAATCTTATA  
CTTTTGAGGAACAGACTTCTGGATATCTTGCTAAACTAATTTATACATCTAAAGAAAAGACAAGCATT  
ATTTGCAAGCTTGTGAAGAACTGGTGAAGACACTGGGTTTTGACTGGATCATGATGTTTATGGAGGAACA  
CTTACATTCCACCACAGTTACAGCAGCCATGAGGATTCTTGTTGTCCTACTAAGTAATCAGTCTATTCTC  
ATCAAGTTTAAAGAAGGACTCAGTGGTGGAGGATGGCTTGAACAGACAGATTCTGTCTTAACTAATAAGA  
TTGGAAGTGTATTAGGATTCAACGTGGGCAGAAGTGCTGGTGGGAGATCGACGGTCAGGGAGATTAAACCG  
AGATGCTTGTCAATTTCTGGTTTTCCAGTCCTTCAGTCATTCTTCTTAAACACACTAATGTCCCTGCC  
CTCTATTTTCTCCTCATGGCCTTGTCTGTCAGCAGCCAGTTAGTGAGCTGCCTGAGAACCTGCAGGTCA  
GTGTGCCTGTCATCAGCTGCCGGAGTAAGCAGGGTTGCCAGTTTGATTGGATTCCATTTGGACATTCAT  
CTTTGGAGTTCCTGCCTCCAGCGGAACTGTGGTCTCTTCTATCCATAACGTATGCACAGAAGCTGTTTTT  
TTATTATTGGGAATGCTCCGCAGCATGCTGACTTCACCTTGGCAATCAGAAGAAGAGGGATCTTGGCTCC  
GAGAATATCCTGTGACCCTGATGCAGTTCTTCAGATATTTGTATCACAACGTGCCAGACCTTGCCTCCAT  
GTGGATGAGCCCTGACTTCTGTGTGCATTAGCAGCCACCGTCTTCCCCTTCAATATTCGCCCTTACTCA  
GAGATGGTGACTGACCTTGATGATGAAGTTGGATCTCCAGCAGAAGAGTTTAAAGCGTTTGCAGCAGACA

CAGGGATGAACAGGAGCCAATCAGAGTACTGCAATGTGGGCACCAAGACATATCTGACCAATCACCCGGC  
TAAAAAGTTCGTTTTTACTTCATGCGGGTCTTAATCATAGACAACCTCTGTCTCACTCCTGCCAGCAAG  
CAAACCTCACTAATTGATCTTTTGTGGAGGCTTCCCCTGAAAGGTCTACAAGAACTCAGCAAAAAGAAT  
TTCAAACCTACATTTTGGATAGCGTGATGGACCATTGCTTGCAGCTGATGTGTTATTAGGGGAAGATGC  
ATCTCTGCCTATTACCACTGGAGGAAGCTACCAGGTATTGGTGAACAATGTGTTTTATTTACACAGCGT  
GTGGTGGACAAGCTTTGGCAAGGCATGTTCAACAAAAGAATCTAACTTCTTATAGATTTTATAATTCAAC  
TAATTGCACAGTCAAAGAGAAGATCACAGGGATTGCTACTGGATGCAGTGTATCATTGCCTCAATAGGAC  
CATCTTGTACCAGTTCTCACGGGCACACAAAACCGTTCCTCAGCAAGTAGCTCTGCTTGATTCACTCAGG  
GTCCTCACTGTAAACAGAACTTGATCCTGGGACCTGGGAACCATGACCAAGAATTCATTAGCTGTCTGG  
CCCACTGCTTGATAAATCTACATGTTGGAAGCAACGTGGATGGATTTGGACTGGAAGCAGAAGCCCGCAT  
GACCACATGGCACATTATGATCCCCTCGGACATTGAACCAGATGGTAGTTACAGCCAAGATATTAGTGAA  
GGGCGTCAGCTTCTCATAAAAGCTGTCAACAGAGTTTGGACTGAACTGATACATAGTAAGAAACAAGTCT  
TAGAGGAACTTTTCAAAGTAACTCTACCTGTGAATGAAAGGGGCCACGTGGACATAGCTACAGCAAGGCC  
ACTCATTGAAGAAGCTGCCCTGAAGTGCTGGCAGAATCATTGGCCCATGAAAAGAAATGCATAAGTCGA  
GGAGAAGCTTTAGCGCCCACCACACAGTCCAAATTATCCCGTGTGAGCAGTGGCTTTGGTCTTTCCAAGT  
TAACAGGATCAAGAAGGAATCGAAAAGAAAGTGGTCTTAATAAACACAGTCTTTCCACCCAGGAGATTTC  
GCAGTGGATGTTTACTCACATTGCTGTTGTTTCGTGACTTAGTAGATACACAATATAAAGAATATCAGGAG  
CGTCAGCAGAATGCCCTGAAGTACGTGACAGAAGAGTGGTGTGAGATCGAGTGCGAGCTGTTGAGGGAGC  
GGGGGCTGTGGGGCCCTCCCATCGGCTCCACCTCGACAAGTGGATGCTGGAGATGACAGAAGGGCCCTG  
CAGGATGAGGAAAAAGATGGTGCGAAATGATATGTTTTATAACCATTACCTTACGTGCCAGAACTGAG  
CAAGAGACAAATGTGGCGTCTGAGATCCCAAGTAAACAGCCTGAGACACCCGATGATATTCCTCAAAAGA  
AACCTGCTCGATATAGAAGAGCCGTAAGTTATGACAGTAAAGAGTACTACATGCGACTGGCCTCTGGCAA  
TCCCGCCATTGTCCAAGACGCCATTGTGGAGAGTTCAGAAGGTGAAGCTGCTCAGCAAGAACCAGAGCAT  
GGGGAAGACACTATTGCTAAAGTCAAAGGTTTGGTCAAGCCTCCTCTAAAACGCTCCCGATCTGCACCTG  
ATGGAGGAGATGAGGAGAACCAGGAGCAGCTACAAGACCAGATTGCTGAGGGCAGCTCCATAGAAGAGGA

GGAGAAAACAGATAATGCTACCTTACTGCGCCTGTTAGAGGAAGGAGAAAAGATCCAACACATGTACCGC  
TGTGCTCGAGTCCAGGGCCTAGATACCAAGTGAGGGGCTCCTTCTTTTTGGTAAAGAGCATTTTTATGTGA  
TTGATGGATTACCATGACAGCAACCAGGGAAATAAGAGATATTGAAACCTTACCTCCAAATATGCATGA  
GCCTATTATTCCTAGAGGAGCCAGGCAAGGCCCTAGTCAACTCAAGAGAACATGCAGCATTTTTGCATAT  
GAAGATATCAAGGAAGTTCATAAAAGGAGATATCTCCTGCAGCCTATTGCTGTGGAAGTTTTCTCTGGAG  
ATGGACGGAATTACCTCCTTGCTTTTCAGAAAGGAATCAGAAACAAAGTCTATCAAAGGTTTTTGGCTGT  
AGTGCCATCTCTAACGGACAGTTCAGAATCTGTATCTGGGCAACGACCAAACACGAGTGTGGAGCAGGGA  
TCTGGGTTACTTAGCACTTTGGTTGGAGAGAAGTCTGTGACTCAGAGATGGGAGAGAGGTGAAATCAGCA  
ACTTCCAATATTTGATGCATTTGAACACTTTGGCTGGCAGATCATATAATGATCTCATGCAGTATCCTGT  
CTTCCCCTGGATCCTTGCAGATTATGACTCAGAGGAGGTGGATCTTACTAATCCCAAGACGTTTAGAAAC  
CTGGCTAAGCCAATGGGAGCACAAACAGATGAACGATTAGCTCAGTATAAGAAGCGGTATAAAGACTGGG  
AGGATCCTAATGGAGAACTCCTGCATACCACTATGGGACCCACTATTCATCTGCAATGATTGTGGCCTC  
ATACCTTGTAAGGATGGAGCCTTTCACACAGATATTCTTAAGGCTACAGGGTGGCCACTTTGACCTGGCT  
GACCGGATGTTTCACAGTGTGCGCGAGGCCTGGTATTACGCGTCAAAGCACAAATATGGCAGATGTAAAAG  
AACTTATCCCAGAGTTCTTTTATTTACCAGAATTCCTGTTCAATTCCAACAACCTTTGATCTAGGCTGTAA  
ACAAAATGGCACCAAGCTTGGAGATGTTATCCTTCCACCCTGGGCAAAGGGGACCCACGAGAATTCATC  
AGAGTCCATCGTGAGGCTTTGGAGTGTGATTACGTGAGTGCCCATCTACATGAGTGGATTGACTTAATCT  
TCGGTTATAAACAGCAAGGCCCTGCTGCAGTAGAAGCTGTAAATGTCTTCCATCATCTTTTTTATGAGGG  
TCAAGTGGATATCTACAACATCAATGACCCACTAAAGGAGACAGCCACAATTGGGTTCATTAATAAATTC  
GGTCAGATCCCTAAACAGTTATTTAAAAAACCTCATCCACCAAAGCGAGTGAGAAGTCGACTCAATGGAG  
ACAATGCAGGAATCTCTGTCCTACCAGGATCTACAAGTGACAAGATCTTTTTTCATCATCTAGACAACCT  
GAGGCCTTCTCTAACACCTGTAAAAGAACTCAAAGAACCTGTAGGACAAATCGTATGTACAGATAAAGGT  
ATTCTTGCGGTGGAACAGAATAAGGTTCTTATCCCACCAACCTGGAATAAACTTTTGCTTGGGGCTATG  
CAGACCTCAGTTGCAGACTGGGAACCTATGAGTCAGACAAGGCCATGACTGTTTATGAATGCTTGTCTGA  
GTGGGGCCAGATTCTCTGTGCAATCTGCCCCAACCCCAAGCTGGTCATCACGGGTGGAACAAGCACGGTT

GTGTGTGTGTGGGAGATGGGCACCTCCAAAGAAAAGGCCAAGACCGTCACCCTCAAACAGGCCTTACTGG  
GCCACACTGATACCGTCACCTGCGCCACAGCATCATTAGCCTATCACATAATTGTCAGTGGGTCCCGTGA  
TCGAACCTGTATCATTTGGGATTGAAACAACTGTCATTTCTAACCCAGCTTCGAGGGCATCGAGCTCCA  
GTTTCTGCTCTTTGTATCAATGAATTAACAGGGGACATTGTGTCCTGCGCTGGCACATATATCCATGTGT  
GGAGCATCAATGGGAACCCTATCGTGAGTGTCAACACGTTACAGGTAGGAGCCAGCAGATCATCTGCTG  
CTGCATGTCGGAGATGAACGAATGGGACACGCAGAACGTCATAGTGACAGGACACTCAGATGGAGTGGTT  
CGGTTTTGGAGAATGGAATTTTTGCAAGTTCCTGAAACACCAGCTCCTGAGCCTGCTGAAGTCCTAGAAA  
TGCAGGAAGACTGTCCAGAAGCACAAATAGGGCAGGAAGCCCAAGACGAGGACAGCAGTGATTCAGAAGC  
AGATGAGCAGAGCATCAGCCAGGACCCTAAGGACACTCCAAGCCAACCCAGCAGCACCAGCCACAGGCCC  
CGGGCAGCCTCCTGCCGCGCAACAGCCGCTGGTGTACTGACAGTGGCTCTGACGACTCCAGACGCTGGT  
CCGACCAGCTCAGTCTAGATGAGAAAGACGGCTTCATATTTGTGAACTATTCAGAGGGCCAGACCAGAGC  
CCATCTGCAGGGCCCCCTTAGCCACCCCCACCCAATCCCATTGAGGTGCGGAATTACAGCAGATTGAAA  
CCTGGGTACCGATGGGAACGGCAGCTGGTGTTCAGGAGTAAGCTGACTATGCACACAGCCTTTGATCGAA  
AGGACAATGCACACCCAGCTGAGGTCACTGCCTTGGGCATCTCCAAGGATCACAGTAGGATCCTCGTTGG  
TGACAGTCGAGGCCGAGTTTTAGCTGGTCTGTGAGTGACCAGCCAGGCCGTTCTGCTGCTGATCACTGG  
GTGAAGGATGAAGGTGGTGACAGCTGCTCAGGCTGCTCGGTGAGGTTTTCACTCACAGAAAGACGACACC  
ATTGCAGGAACTGTGGTCAGCTCTTCTGCCAGAAGTGCAGTCGCTTTCAATCTGAAATCAAACGCTTGAA  
AATCTCATCCCCGGTGCGTGTGTCAGAACTGTTATTATACTTACAGCATGAGAGAGGTTTCAGAAGAT  
GGGCCTCGAAATTGTTGAAGATTCAACAAGCTGAGTGGAGACCATGGTCTGTAGACCCCTTCCCGATTCT  
CCTGTCCCAGCTTGGAAGGCATTGAAAACAGTCTCCGTTTACACATCTCTTCATACCACGTGTTTGAAGT  
GTAAAATTCAAAGGGATCATTGAATAAAACGGGTGTAGAGTACAGGAATGGGGCAGACGCGATTCAAGT  
GAACAGCACAAGAAGAATATGAGGTGGTTCCTAGGAGCAACACTTTCGACCTCCAGTTCTCCCTGATGAC  
AGTAGCTGTCTCCAAGAGAAAAATCCTCACTTATTAACCTCTCTTTTCTTGCACTCATTTTTATAGAGCT  
ACTCATCCTTATTTGGAAAAACCAACAACAAAAAAGGCTTTTAGAAAATGGTTGTAAATCTGACTTCTTT  
GCAAGTAACTATGTATATTGTAAATAGATATAAAAGGCCTTTTTCTAAATAAGGACTTAACTGCCTGTA

ACATGAACTTCAAACCTAAACCACTAACTCAATGAACTACTTATGGTTTGTCTGACATCCCTCACTTACC  
AATTAATTATAAATATGTTTTTTTAAATCCCCAAAGACATTATCTGTGGTCTTTTTTTCCTTTCAAGCTC  
AGCCTGTGTGCCTGATGTCATTTCTTTCAAGTTGCCACAGTATCTCCACTTAAACTAGGCTAGTAACCA  
AAATAATGTGGACCTTCTTTAGGAAACAGTGTGGGAGAATAGGAGTCCAGCCGTAAGATAAACTGGAAAT  
ATTTGGGCGTCTTGACCTGGCTACGCACCACCTCAGTGTTGTTCTACATAAACAGGGCCCCCTTTTAAA  
CTTGATGTGGACTGCTGTTTGGTCAAAGAATACCTTCTTAGCATTGCAGAAAGGTGGTCAGATGACCAG  
TG TAGTGCAGGAAACAGCCCTGTCTCACTAATGGAAATATATTTGCATGTAACCCAAAATTAGCTTATC  
TTGCATAGAACATAATAAGTATGTGTCTTTGGTGACACTAATGTTCTACTATAGCTTATTTTCAAACAAG  
GGGTAAAAAAGGAAAGAAAGAAGTGTACAGAATTAACATATAAACTTTGTTGTAAAACTGAATCATGTC  
AGAAGTCTTAAATTAACCTTTACCATTTAATGTCATCTACCTGAAAACAGTGAGATTTATACTGTATC  
AATGTCTATTTTTTTGTTTTTGCTATGAATATAATTACAGTATTTTAATATTTAGTTATTTAATTTGTTT  
TACTAGTTGGATACAGAACACACAAATCCAGGGGGATTAAAGCTGGAAGGGGCTAAGAGATTAGTTTACA  
GAGAAAAGGCTTGGTGGTGGGATTTTTTTTAAATGTGTGTTATGTACATATATATATATATAATATATA  
TTAAAAATGAAACAATTAATCTAGATTTTAAACATTTTCAGAACTTAGTGATAACATTATGAACAATTCT  
AAAAGCCCTGTGATTTGAAAAATATAGAATCATTAAATGGCCCAAGATAGGCCTTCACACCTTCACAGGTG  
CGAAAGGAAAGGCCTTCACACCCTCACAGAGGCATCATGCAAAGGACAGCGCTTTGGCTTTTCCAATTT  
TCCATCTTTAGGCCCTGGTGAGAGGCACACTTATGCACTAAAATGCACATATATGCACATGCATTCAAAA  
ATAGGCATTTGGTACAATGGTGATCTTGACCTGATGGGCTGAAACCAGCTTAAGAACAAATTTGTTCTT  
CCTGATATGATAACTAGGTCTCCAAGAGAAAATAGAAAGGCTGCTTTAGTGCCTTACGCTTACTAAATTT  
AAATCTTTATTTACCTGGGTTTGAGCCTACAGTCTATTTATGATTACATATCAAAATTGATTAACAACT  
TCCATTTCTAAAAGTTCAAATATACTTGTTAATAAAAGGATTATCGGCATTAATACTTTAATTTAAAGAA  
AAGTTGTGTTCTGTTTTCTTTCTGTGTCTTACTCCCCCACACTCTCCCTCCCCCATCACCATCTTCAA  
TTCTAATAAATAATGCTGATGTTCAACAGTTGCAGAAATTGTGCTATTATGTAAGTGTGGGCCTTGCCCC  
TGTCTGGCCCTCTAGATGATTTGTAGCAGTGTTATTCTACACTTTTTTAAAGAAGCGTCCTCCTTTTGTC  
CATGAATCATGTTTACCCCATACCCAGTGGCAGAGGTGTTCTTTAAAGACTTGAATATATGAATGTGTGT

GTGTAGTTACTTAAAGGTTATTCCTCTTTGTAATAGGAACTATATGGGATGAACACTTTTAACTTTCC  
GACACAACTTCCATTACTAACTTTCTAACAGAACTTCCATAACTAGAAGGTGGAAACCAAAACCCTCATG  
GTAGTATTCCTCTGGCAGCTGGTGCTGTGGGCAACTGTTTTGTTCAATCGGGTTTCTTTCTTTTGCC  
TCTAATGCAGAAATCAACAGAATCACTCACACATACAAGTACACTCACATACATAAACTAATTATTTCTC  
TGGATATCTTTCTGTGTTCCATGTAAATTTATTTACCAACATCTATTGTCAACATGTACATCTACCTTAG  
TATGGTCTGCATTCTTTTTCTGAGAGTACCTCATAGGGCTCCTGCCTGATCTTTGTAGTTTGTTCAATCA  
TCCATCCACCTGTTCAATTTGTTTCATCCATGTATTCTAACATTTCTATGTAGTGTGCAACTCTAATGTCAT  
GCTTTTGAAGAAGAGAATAGCTGCCCATAGCAGCCATCCGTCTGGATAATAGCAAAACACTCTAGATAAG  
TTATTTTGCACCTTCTTATGTATAAAGTTGGTAGAACTTATTTTTGCTTTGTATCATTTAAATACATTT  
TGTTTTGGTAAATGAACTGTGTATAAAATATTTATGCCGTTAAAACTGTTTTTAGAAAGTATTTTAATT  
TCAGCAAGTTTGGTACTTGTTCATGACTCTTAACACAGCTGACTTTTTGTGTGAGTCAATGTATATT  
TTTTGTCCTGTTATTAAGTTGTAAGCCCTAGTAATGGCCAATTATTTGTACAGCAACAGAAAGTAAATTGA  
AGATACTGGCTAAGACTGGATTGATTGTGGACTTTTATACTATATTGCAGAAACCAATATCTGTTTCTTG  
GTGGTTATGTAAAAGACCTGAAGAATTACTATCTAGTGTGCAGTCTGTGATATCTGAATGTTCAATTGTAT  
ATTTGTCTCTGATGCAAAAAGGTAGAGTAACACAATTACAATACATGATTAAATGCAATAGTCCAGGTA

>NM\_007075.4 Homo sapiens WD repeat domain 45 (WDR45), transcript variant 1, mRNA

GGGTGCCATTTCAGTGCCTGGGCTCCGGGAAAGTCGTGCTTTTACGGTTCGGGTACTGGCTCCCACACCA  
CTGCCTCGTGTGGGGTTGTTGCCCCGTGAAGGGGCAGGACAGGGTGCGCGCTGGTGGAGGTTGAAATTGT  
TACATTTTGGCCGGGCGCGGTGGCTCACGCCTGTAATCCCAGCACTTTGGGAGGCCGAGGCAGGTGGATC  
ACGAGGTCAGGAGATCGAGACCATCCTGGCTAACACAGTGAAACCCCGTCTCTACTAAAAAATACAAAA  
AATCAGCCGGGCGTGGTGACGGGCGCCTGTAGTCCCAGCTACTCAGGAGGCTGAGGCAGGAGGATGGCGT  
GAACCCGGGAGGCGGAGCTTGCAGTGAGCCGAGATCGCGCCAGTGCACTCCAGCCTGGGCGACAGAGCGA

AACTACGTCTCAAAAAAAAAAAAAAGAAAGAAAAGAAATTGTTACATTTTATATATATAGGAACAATCC  
TGCACCATGACTCAACAGCCACTTCGAGGAGTGACCAGCCTGCGTTTCAACCAAGACCAAAGCTGCTTTT  
GCTGCGCCATGGAGACAGGTGTGCGCATCTACAACGTGGAGCCCTTGATGGAGAAGGGGCATCTGGACCA  
CGAGCAGGTGGGCAGCATGGGCTTGGTGGAGATGCTGCACCGCTCCAACCTTCTGGCCTTGGTGGGCGGT  
GGTAGTAGTCCCAAGTTCTCAGAGATCTCAGCAGTGCTGATCTGGGACGATGCCCCGGAGGGCAAGGACT  
CCAAGGAGAAGCTGGTGCTGGAGTTCACCTTCACCAAGCCAGTGCTTTCTGTGCGCATGCGCCATGACAA  
GATCGTGATCGTGCTGAAGAACCGCATCTATGTGTACTCCTCCCCGACAATCCCCGAAAGCTGTTTGAG  
TTTGATACCCGGGACAACCCCAAGGGGCTCTGTGACCTCTGCCCCAGCCTGGAGAAGCAACTGCTAGTGT  
TCCCGGGACACAAGTGTGGGAGTCTGCAACTTGTGGACCTGGCGAGCACAAAGCCTGGCACCTCGTCTGC  
TCCATTACGATCAATGCACATCAGAGTGACATAGCCTGTGTGTCTCTAAACCAGCCAGGCACTGTAGTG  
GCCTCAGCCTCCCAGAAGGGTACCCTTATTCGCCTCTTTGACACACAATCCAAGGAGAACTGGTGGAGC  
TGCGCCGAGGCACTGACCCTGCCACCCTCTACTGCATTAACCTCAGCCACGACTCCTCCTTCTCTGCGC  
TTCCAGTGATAAGGGTACTGTCCATATCTTTGCTCTCAAGGATACCCGCCTCAACCGCCGCTCCGCGCTG  
GCTCGCGTGGGCAAGGTGGGGCCTATGATTGGGCAGTACGTGGACTCTCAGTGGAGCCTGGCGAGCTTCA  
CTGTGCCTGCTGAGTCAGCTTGCATCTGCGCCTTCGGTCGCAATACTTCCAAGAACGTCAACTCTGTCAT  
TGCCATCTGCGTAGATGGGACCTTCACAAATATGTCTTCACTCCTGATGGAAACTGCAACAGAGAGGCT  
TTCGACGTGTACCTTGACATCTGTGATGATGATGACTTTTAAGGACCCTGGGGGCTGTGCTAGGGACCTG  
CAGTGGCAGAACTGCAGAGCTGAGCCTTGGCAGTGGGGCGTGCTTGGAAGCCACCAGCCAGCAAGCATT  
ATGGGGCTGGTGCCCACTTTTCACTCAGCAGAGCTATGTCTAAATAAAGAGCTCACTTCCCCCAGCACT  
TCTTGATGACTGTGTGCCCCAAGGGCCAGGCCAGAGACCCAGGAAGGCAGCGACCCCTTGGGATCCCTAA  
CCTGGAGGAAATTGCCAGGGACCCAGAGGGAGTGCCCTAATCCAACCTGGGGATTTTTTAAAGCTTCCT  
AGGAAGAGATGATCTCCGATGTGATGAATACGAATAAAAGGCCCTTAATGGCA

>NM\_019613.4 Homo sapiens WD repeat domain 45B (WDR45B), mRNA

ACTTCGGCCGCGGGCGCCTCAGCGCCGGCCCCGAAGGGACCAGGCCGCGCTCCCCAGCGAGAGGCATGCA  
GCGCTGAGGAGCGGCGACCCAGCACGGCGGGGCCATGAACCTCCTGCCGTGTAACCCTCACGGCAACGGG  
CTGCTCTACGCCGGCTTCAACCAGGACCACGGATGCTTTGCGTGTGGGATGGAAAATGGATTCCGAGTCT  
ATAACACTGATCCACTAAAAGAAAAAGAGAAACAAGAATTTCTAGAAGGAGGAGTTGGCCATGTTGAAAT  
GTTATTTGCTGCAACTATTTAGCTTTAGTTGGTGGTGGAAAAAGCCGAAATACCCTCCCAACAAAGTA  
ATGATCTGGGATGACCTGAAGAAGAAGACTGTTATTGAAATAGAATTTTCTACAGAAGTCAAGGCAGTCA  
AGCTGCGGCGAGATAGAATTGTGGTGGTTTTGGACTCCATGATTAAGGTGTTACATTCACACACAATCC  
CCATCAGTTGCACGTCTTCGAAACCTGCTATAACCCCCAAGGCCTCTGTGTCCTTTGTCCCAATAGTAAC  
AACTCCCTCCTGGCCTTTCGGGGCACGCACACGGGCCATGTGCAGCTTGTGGACCTGGCCAGCACGGAGA  
AGCCACCCGTGGACATTCTGCACACGAGGGTGTCTGAGCTGCATTGCACTCAACCTGCAGGGAACAAG  
AATTGCAACTGCATCCGAGAAAGGGACGCTTATAAGAATATTTGATACTTCATCAGGGCATTTAATCCAG  
GAACTGCGAAGAGGATCTCAAGCAGCCAATATTTACTGCATCAACTTCAATCAGGATGCGTCCCTCATCT  
GCGTATCCAGCGACCACGGCACAGTGCATATTTTTGCAGCTGAAGATCCAAAAAGGAATAAACAGTCCAG  
TTTGGCCTCAGCCAGTTTCCTTCCAAAATACTTCAGTTCCAAGTGGAGTTTCTCCAAGTTTCAGGTTCCC  
TCAGGCTCTCCGTGCATTTGTGCCTTTGGAACAGAGCCAAACGCCGTCATTGCAATTTGTGCAGACGGCA  
GCTACTACAAATTCCTGTTCAACCCCAAGGGGGAGTGCATCCGAGATGTCTACGCGCAGTTTCTAGAGAT  
GACCGATGACAAGCTGTGACTCCAGCTGGGGGCGCCACAGCACCCACCACCTGCCGCCTTCAGACTCTCG  
GGGCTGGTGCCAGTGCCCCAGGGGCCTCCTGGGCCACGGGCTGGAGGGGCTGCCAGGGACCTTGGTCTC  
GAAGCCATACGTGGTTGTCTGCTTTCCTAAGGACTCCCATTTCCAGTATTAAAGAGAGAATCATCATCA  
GGCACCGTAGGTAACCTCAGTGGCTGTGACCAGCTCGACTGGCGGCCACTGGCTGTTCCCATGAGTTCAGC  
TGTGACGTTAGCTTCAGTGGCTCCGCCGCATCCTCACACTGACGGGGGCTCCATACGGACCTGGGGACTG  
GGCTGAGAGGGTGGACGAGTTCAGGTTTGTGTTTGCAGCAGATTCCGTCGTTCTTACTGAGTCTGCAGCG  
GGGGAGTGAACAAGTGTGCAGATGTAAGTTCTTACATGATAAGCAGATTGAATACAACACCAGCAGCTTG  
CCTTAGAAAAGGAGAAAGGAATTCCTTTCCCGCCCCGAACATGAAGAAAAATGACCTGACCCTGTAGAGA

GAACACAGTGTGAATGTTTCCCCTCGTGTGAGCCCAGCCTGTGGTCTTCTCCGTACCCGCAACGTGGTCA  
TCTGTGCCCCGTGACGTCACCTGTGCCCCGTGCGTGGCGTCCCCGTCTCCGTTGGGGCCATTAGAATGAGGC  
AGACACCAGGCCACTCTAGAAGCCGAGCCGTCACACCTCAGGCGTGTGCGGGGCGGGGACGGGGGGTCTC  
CTGGTTACATTTTGGATTAAACCTGTTTCCCGTTATGTGTAGGGAACAGCAGAGTGATGCACGAACTTT  
GAACATTCGTTATGGGGAAAACATCCTTTAACTTCGGGGTCTGTCTGCCAGAGCAGGGTCTGGGAGGGTCC  
ATGCAGTTCCTCGTGGTGTGGAGGGAAATGCCCTGGTCTGGCCTCCGAGCCCCCAGGTCCACCGTCTCCC  
CTCCCCTCATTTGTAAGAATAGCTACACACTAACATTTTGGGAAGGAGAGGCACATAACTTTTTTTAACA  
TTTGTTAACTAGGTTATGGGCTCTACATTGTCAGCTACTTGGGATATATATTTAATTTTCTTAAATTCCC  
GTTAAACTCTATTTTATGGTTTTGATTTGAGATTGCAAACATGTAAAACCTGCATAGCAGCGAGTTCTCG  
GTTTTGCCGGTTTCTTTAGTTCTTTACTGTCACTGTCATGTAATCAGCTAATTCTCTGTGGATGTTGCTG  
TAAAGTATGCATGTTCTTTTATGTGTATTTAATCATGATGTTTAATTTTGCACACTTATTTGTAATGTT  
TCTTTTAAATAAAAGTGACTAATTTTGTGTAGTCTGGACCTGTAA

>NM\_017983.7 Homo sapiens WD repeat domain, phosphoinositide interacting 1 (WIP1), transcript  
variant 1, mRNA

GTGGAGCCGGCGCGGGCGGGCTGCTGAGGTGGCTGTCGCCGGCTCCGAGCTGCGGCTTCCCGGGCCGAGC  
CCCCGATGGAGGCCGAGGCCGCGGACGCTCCCCGGGCGGGGTTGAGTCGGCGCTCAGCTGCTTCTCTTT  
CAACCAGGACTGCACATCCCTAGCAACTGGAATAAGCCGGGTATAAGCTGTTTTCTCTGAGTTCTGTG  
GAGCAGCTGGATCAAGTCCACGGAAGCAATGAAATCCCGGACGTCTACATCGTGGAGCGCCTCTTCTCCA  
GCAGCCTGGTGGTGGTAGTCAGTCACACAAAACACGGCAGATGAACGTGTATCACTTCAAGAAAGGCAC  
AGAGATCTGTAATTACAGCTACTCCAGCAACATCTTGTCATAAGGCTGAACCGGCAAAGGCTGCTGGTT  
TGCCTAGAAGAGTCCATTTATATTCACAACATTAAAGACATGAAGCTGTTGAAGACCCTCCTGGATATTC  
CTGCAAACCCAACAGGTCTATGTGCTCTCTCTATCAACCATTCCAATTCTTACCTGGCCTATCTGGAAG  
CCTGACTTCAGGGGAGATTGTGCTTTATGATGGAACTCCCTGAAAACAGTCTGCACTATTGCTGCCCAT

GAGGGAACACTAGCTGCCATCACCTTCAATGCCTCAGGCTCCAACTAGCAAGTGCGTCTGAAAAAGGCA  
CAGTCATCCGGGTGTTCTCTGTCCCTGATGGGCAAAAGCTCTATGAGTCCGGAGAGGGATGAAAAGGTA  
TGTGACAATCAGCTCTCTAGTGTTCAAGTATGGATTACAATTCCTCTGCGCCTCCAGTAACACCGAGACG  
GTACACATCTTCAAGCTGGAACAGGTCACCAACAGTCGACCAGAAGAGCCTTCGACCTGGAGTGGCTACA  
TGGGAAAGATGTTTATGGCTGCTACCAACTACCTCCCTACCCAGGTGTCAGACATGATGCATCAGGACAG  
GGCTTTTGCCACTGCACGCTTGAACCTCTCCGGACAGAGGAACATCTGTACCCTCTCAACGATCCAGAAG  
TTGCCACGGCTGCTAGTTGCGTCATCCAGTGGACACCTTTATATGTACAATTTGGATCCTCAGGATGGAG  
GAGAGTGTGTCTTAATCAAAACCCACAGCTTGCTTGGCTCAGGAACAACAGAAGAGAATAAAGAAAATGA  
CCTCAGACCTTCCTTACCTCAGTCTTATGCAGCGACCGTAGCCAGACCAAGTGCATCTTCAGCCTCCACG  
GTGCCAGGTTATTCTGAGGACGGCGGGGCGCTGCGAGGAGAAGTTATTCTGAACATGAGTTTGCGACGG  
GACCAGTGTGTCTTGATGATGAGAATGAGTTTCCTCCTATAATCTTGCGCGTGGAATCAGAAGGGCAA  
AACGAAGCAGTCATGATGAGAAGCACACCTCAGAAATCAGGACATCCCCCTATCAGGTGGTTTTGGAGA  
AAACAAGGAAGGCGGAAGAATGGAGTGCAATTGTGTGAGCAGAAAGGGGGGCAGGAATCCCGGGTGCTCC  
ACTGCTTAAACCACAGGACCTGGTTAACTCCTACCAAGCTTCCCACGACCCTGGTTGCCAATGGGCGCG  
GGAGACATTGTATACACATCATGCTATTTAAAATACGTTCAAACCTATAGTGTAATGCTAATTAACCATA  
TTGGTATATAACCGGAATTTTATATTAAGGGGCTCCTTTTAAATATATGCCGTGTAAAAATGTAC  
TTATAGGAACATCTCTTTGAATTGTATTTCTGTATATTACATACTTAGAGAGAGACTCTTTTAGCCAGG  
CAAAGTCTTTTTTGGCTGTGGCTGGAATAAATCATTTATTACTTGGGAGTCCCATTTTGGACACTAATAA  
TAAAATCATGGCAATGCA

>NM\_015610.4 Homo sapiens WD repeat domain, phosphoinositide interacting 2 (WIP12), transcript variant 1, mRNA

GTACCGGGTGCCCCGGCTCTGGAGCATAAACAAGAGCGGGGACGGGATGAGGCGGCGGTTGATCCCAGGG

TGGCGAGTGGCGGCGACCGAGGCGGGCGAGCGGGGCCGCGCCGACCCTGAGTGCAGCCTGACCCGCCCT  
CGCGCGCGCGCCCTCCCCGGCCGGGCCCCACTCGCCGCGCGCCAGCCATGAACCTGGCGAGCCAGAGCGG  
GGAGGCCGGCGCCGGCCAGCTGCTCTTCGCCAACTTCAACCAGGACAACACAGAAGTGAAAGGGGCATCA  
AGAGCAGCTGGTCTTGGCCGTCGCGCTGTTGTCTGGTCCCTAGCTGTTGGTAGTAAGTCCGGTTATAAAT  
TTTTCTCCCTTTCTTCTGTGGATAAGCTGGAACAGATCTATGAATGCACCGATACGGAAGATGTGTGCAT  
TG TAGAGAGATTGTTCTCCAGCAGCCTAGTGGCCATCGTCAGCCTTAAAGCACCAAGGAAGCTAAAGGTT  
TGCCACTTTAAGAAGGGAACTGAGATCTGCAACTACAGCTACTCCAACACGATTCTGGCTGTGAAGCTCA  
ACAGGCAGAGGCTGATAGTATGCCTGGAGGAGTCCCTGTACATCCACAACATTTCGGGACATGAAGGTGCT  
GCATACGATCAGGGAGACGCCTCCAAACCCTGCAGGCCTGTGTGCGCTGTCAATCAACAACGACAACCTGC  
TACTTGGCGTACCCAGGGAGCGCGACCATCGGAGAGGTGCAGGTCTTCGATACCATTAATTTGAGAGCTG  
CAAACATGATTCCGGCTCACGACAGTCCTTTAGCGGCACTGGCCTTTGACGCAAGTGGAACATAAAGTGC  
CACGGCTTCGGAGAAGGGGACCGTGATTAGGGTATTTTCCATTCCAGAAGGACAAAACTCTTTGAGTTT  
CGGAGAGGAGTAAAGAGGTGCGTGAGCATCTGCTCCCTGGCCTTCAGCATGGACGGCATGTTCTCTCCG  
CCTCCAGCAAACTGAGACCGTGACATCTTCAAACCTCGAGACTGTGAAAGAAAAACCCCCAGAGGAGCC  
CACCACCTGGACCGGGTACTTCGGGAAAGTGCTCATGGCCTCCACCAGCTACCTGCCTTCCCAAGTGACA  
GAAATGTTCAACCAGGGCAGAGCCTTCGCCACGGTCCGCTGCCATTCTGCGGCCACAAAAACATCTGCT  
CGCTAGCCACAATTCAGAAGATCCCGCGTTGTTGGTGGGTGCCGCCGACGGGTACCTGTACATGTACAA  
CCTGGACCCCCAGGAGGGCGGCGAGTGTGCCCTGATGAAGCAGCACCGGCTGGACGGCAGTCTGGAAACG  
ACCAATGAGATCTTGGACTCTGCCTCTCACGACTGCCCCCTAGTCACTCAGACATACGGCGCAGCTGCAG  
GAAAAGGTACTTACGTGCCTTCATCCCCAACGAGACTTGCCTACACAGACGACCTGGGTGCTGTGGGTGG  
CGCCTGCCTGGAGGACGAGGCCAGCGCCCTGCGCCTGGATGAGGACAGCGAGCACCCGCCCATGATTCTT  
CGGACTGACTGAACTTGACCTGTGACCTCTGACCCGGGGAGCAGAGAACACTGGCTTCACAGAGGACTTT  
GTGCATTGCTGCTATGAACTTTGACCTGAGTCGGGGGAGAGGATGGCAGAGACTTTATTAATAAAAAAAAAA  
AAGATTGTAGTGGTAGTCTAACTCCATAACGCTGAGGAAATACATCATTTTCACTTCAGTGGCTTTTAA  
TCCTGCTTATGAATTTTAGCTTTTGTGTTGTTTCTCTTTTGCCAAAATTAAGTGTGTTGGTGAAG

CCCGCAAACCTCCTCGCTTTGCATGCATGAACGTGCCAAGCCAGCATAGGGGAGCTAGAAGCCACTTTC  
CAGCCACCTGCCGTTGGGTTTTTTCATATCTGTACATAATGCCGAGTGCGTAAGGAAACCGTGGCGTCGC  
GCACAGTGGGTCTGCTTGTCAAGGCCAGTTCTGCAGTGACAGGCCAGGGGCTGCCACCAGGTGTGCTG  
GGCAGACTTCAGCTGGGACAGAAGTCCGATCTCCCTAGGGCCCCACCTGGACCATTTTCCCTCCGTTTTA  
TTTTGTTAATTAAATTCTTCCAAATTGGATCGCTCTGGGATTTCTTCCATGGTGGACTTTTGTTTCTGA  
TCTTGTTTTCCCTGTGGATATTGGAGGACAGCGAGGTTCTTTCTGATACTAAAAACCTTTCTTTCAGGCA  
GCAAATGAACTTGAAAGGTTGCCTGGACTCGCTGGAGCAAAGGAAAGCGATTTTGTGTATAATTAAAT  
GATCTGTTCTTCTACTTCACTCTTCTGTTGAAAACTGTGTGATTTTTTTTTTTTTTAAGTAAAGTTT  
GTAGCTCCTCCCATGCCCAGGAAAGCACAGAACTCAAGTGTGGTGGCCGTCTGAGCTGTCCTTCGCTGG  
CCCCGCTGTCCGCAGGGGCTTCTACCTGTGTGAGAGGTCGTAGCGGGAGACAGCAACAGAGAGTAGGCG  
GCTGGGCCACGTCTTCACAGGGCGTCATGTGCCTTTCTATTTTCATCTTAGAAAATTCCTCAGCAAAC  
CGATGAGAGATTGTGGTTGCAAGCTTCAGTATTTGCCTCGCTTCCCTTCCCTTTTCATATTTACAGAATT  
AAAACAACCTCAAGTACCTCAGACTCTGCATTCCAAACCAAGGCACCCAGCAGCCAAAGTGTGAGGGCA  
TTTAAGTGGCATTAAATGGCAGGAGAGATGGTTTTAGAATCTATGGAGTGGTGGGAAGTTACGGATAGAAGG  
GAAAAGGCAAAAACTATTTACCCTGCCTTTGCAGGCTGGGGTTTTTGAACCGAGGAAGGCTGGGACGCCT  
GTTTCCAGATGGTTGTCATGGTCACGCTGGGCGAAGAGCTGGAGGGGAGTTGTCCCTCAGCTGAGCGGC  
TGCGGTGAAATGCCCCAGTGTTCTGGGTTGGCTTTACGGCAAATAAATGCAGGGGACGCTGGAGTCCG  
ACTCACCTACACCGGCTTCTCCAGCCGCTGGTGTGCGGCACACACAACATCTGCATTAGGCAGAGGTG  
CAAGTGGGCTGATTGAACTTTTCTTCAAAACCTGCTTGTCTGTCCTGGACCTTTGATGAAATGGGATCC  
CGGTCACGCAGGCTGAGACAGTGGGGACCGCCGAGGCCAGAGTGGGCTATGCTTGAGCAGGGATGAGAAG  
GGCCGCGGCAGCACGCAGCCTTGACCCACGCCTGCGTCTTGTGGTGCAAGGCCAGAGGGCTCTCTCTAGA  
ACCTGACCGTGCACTCCATCTCCTGGGAGCCACTTTTGGCAAGAGTGAGTGTGGGGGAAAAAGTGTGCA  
CAAGAGATACGGAACCCTGAGCTAGGGTTTCTGTACCAAAGAGTGAGCTGCATTTCCAGTTCTGCGTT  
AAAGTATCGTTTGTCTGGTGCCTGCCTGTGGTGGTGATTTGGAGACTCAAATTTCTTTGCCAGGTCTC  
TTTTGTCTTTCTTGGGATTGGTAGTATAGAAGATGCTGGGAATTGTCTTCTCGCTCAGCCTCGGCTTC

CCGCACTGTAAGATGAGGCAGTTGCAGAGGAGGCCTCGGACGTCTGTGACCCTCGGCCCACACTCCCCC  
TTGGGTGGCCCTGGCAGGGCTGGCTAGGTGCGTTCCCTGCAGACCACGGGAAGCCCTGTGCTTGCCTGGG  
TCAGGGCTAAGCTGTGCGCCCTAGAGGAGGGAGGAGGACTGCAGATTCTTGGTCGAGAAGAATGAAGAGG  
ATTTCTGTGTTTGCTGAGCAGCCATTGTGGAGGGTTACCCGCCTCCACTTTCCCGTTGCCATTTCCTG  
CCACCAGCTCCTCTTCTCTGCTCGAACCTATGAGTCCCAGCCTCACTGGCGGCCTCAGACATGCTCAGG  
AGTGACGGGGACAGAGGGAGGCCGCTGAGTTGCCCCTTAGAACTCTTACTGCTGCGCCAGTGACCCAGGT  
GGAGAGGGACCCTGAACCAAACAGAACGTGTGCTAATTTCCGAACTCCAAACTGTACACTCATATTTCAT  
TTTTAAATTGTATTTTCCAACTTCAAAAAGGACGATGAGCGTGGGGGATAGGAAACAAAACCTGTAAA  
CGTTGTGAATGGGCTCAGTGGACTCTGGGACCAAACCTTCTGTAATCTCTAAAACAATGGGACCAAGAGC  
TGGATGGAACCTGGAGTCAAAAAGAACTGCTTCAGTCCCCGCTGTACCGCCTGCCTAGCTGTGGGAGCAG  
GCAGGGCGCCTGGGAGCCTGCGTTTTCTGGACCGTTCATGGGACTCATCCCTACCTCACAGGGCTGTTG  
TGAGGTGTTGTGTGACTGCGTGTCTGCAAACGCCAGCTCGGTGCCAGCCAGCGGTGGGCACCCAATA  
AACGCTACAACATAAATGTGTCTTCTGCAATAAA

>NM\_021260.4 Homo sapiens zinc finger FYVE-type containing 1 (ZFYVE1), transcript variant 1, mRNA

ACTCCGATCAGCTGATCCCAACTGACAACAGGAGAGGAGGAAGCCCGGGAGGCAACGAAGGAGGAGGGTG  
GCGGAGATGGAGATGAGGATGGATCTGCCGGTGTCTGAGGAATAGCCTCTGCCCCCACTGGCGCCCTGC  
GGCCCCCGACGCCGCTTGCTGCGGCCGAGCTTCTCAGTGGTATCCCCTGAAATACTGACTTCAGGTCG  
AATTATATTGAAAAGCTCCTGACCACTTTCTTTCATTACCAAAACTTTGTAGCTGATGTCCAACCGATGA  
ACCCACCACCGTGAACCCATCAGACCTCTCTCAGATAGCCATAAAAGACCCTTCCAAGTCAATTTTGACC  
ACATCTTTGCTTGCACTTTATGGAGGATGAAACCATCAAACCAAATCAACGTTGCTGCTAATACAAGAGT  
CTTAGAGGCAGCAAATTAATAAATTTGAACATTTGTTGTGAAGAACTATAACAGGACATGAAAGGTGTTT  
TTTTTTAAAGTGTTCAGAACCTGTGGAAGTTTCGTGCAGTCTTCAGACTCAAATCTTCGTCTTCACCCC

CGGGGCAAGCTCAGTGACTATTATATGGTGGGTGTGTTTCCTTACCAGCGTGAGTATGAGTGCCCAGACT  
TCCCCAGCAGAGAAGGGCCTGAATCCGGGGCTGATGTGCCAGGAAAGTTACGCTTGACGCGGGACTGATG  
AAGCTATCTTTGAGTGTGATGAGTGCTGCAGTCTGCAGTGTCTCCGCTGCGAGGAGGAGCTCCATCGGCA  
GGAGCGCCTGAGAAACCATGAGCGGATAAGACTCAAACCTGGCCATGTCCCTTACTGTGACCTCTGCAAG  
GGTCTCAGTGGGCATTTACCAGGTGTTAGGCAGAGGGCAATAGTGAGGTGCCAGACCTGCAAAATTAAC  
TGTGCCTGGAGTGCCAGAAGAGGACTCATTCTGGGGGTAACAAAAGGAGACACCCTGTTACTGTGTACAA  
TGTCAGTAATCTCCAGGAGTCACTGGAGGCAGAAGAGATGGATGAGGAGACCAAGAGGAAGAAGATGACT  
GAGAAGGTTGTGAGTTTCCTCTAGTAGACGAAAATGAAGAAATTCAGGTAACAAATGAAGAAGACTTTA  
TTAGAAAATTGGACTGCAAACCTGATCAGCATCTGAAAGTGGTTTCCATTTTTGGAAATACTGGTGATGG  
AAAGTCTCATACTCTCAACCACACTTTCTTTTATGGTCGTGAAGTCTTTAAACCTCCCCGACCCAGGAG  
TCCTGCACTGTGGGAGTGTGGGCAGCCTATGACCCAGTTCACAAAGTAGCAGTGATCGATACGGAAGGGC  
TCCTGGGGGCCACCGTGAATCTAAGCCAGAGAACACGGCTGCTGCTTAAGGTCCTGGCCATCTCAGACCT  
CGTCATCTATCGAACTCATGCAGACCGGCTGCATAACGACCTCTTCAAATTCCTTGGGGATGCCTCAGAA  
GCTTATCTGAAGCACTTCACCAAGGAGCTCAAGGCCACCACTGCTCGCTGTGGCCTGGATGTCCCTTTAT  
CCACACTGGGCCCTGCAGTTATCATCTTCCATGAGACCGTGCACACCCAGCTACTGGGCTCTGATCATCC  
CTCAGAGGTGCCAGAGAAGCTCATCCAGGACCGGTTCCGGAAGCTGGGCCGTTTCCCTGAAGCCTTTAGT  
TCCATTCACTACAAGGGAACGAGGACTTACAACCCTCCCACGGACTTTTCTGGGCTTCGGCGTGCTTTGG  
AGCAGCTACTAGAGAATAACACCACCCGTTCTCCCCGGCACCCGGGAGTCATCTTCAAAGCCCTGAAGGC  
ACTAAGTGACCGCTTCAGCGGTGAGATCCCCGATGACCAGATGGCGCACAGCTCCTTTTTTCCAGATGAG  
TATTTACCTGCTCCTCCTGTGCCTCAGCTGTGGGGTTGGATGTAAGAAAAGCATGAATCATGGGAAGG  
AAGGAGTGCCTCATGAAGCCAAGAGCCGCTGCAGATACTCCACCAAGTATGACAACCGAGTGTATACCTG  
CAAGGCCTGCTATGAGAGAGGCGAGGAAGTCAGTGTAGTGCCCAAAACATCTGCTTCCACTGACTCCCCC  
TGGATGGGTCTCGCAAAATATGCCTGGTCTGGGTATGTGATCGAATGTCCTAACTGTGGCGTGGTCTATC  
GTAGTCGGCAGTACTGGTTTGGAAACCAAGATCCTGTGGATACGGTGGTGCGGACAGAGATTGTGCATGT  
GTGGCCTGGAAGTATGGGTTTCTGAAGGACAACAACATGCTGCCAGCGCCTGTTGGACGGGATGAAC

TTCATGGCTCAGTCGGTGTCCGAGCTTAGCCTTGACCCACCAAGGCTGTGACTTCCTGGCTGACAGACC  
AGATCGCCCCTGCCTACTGGAGGCCCACTCCCAGATTCTGAGCTGCAACAAGTGTGCGACGTCCTTTAA  
AGATAACGACACTAAGCATCACTGCCGAGCCTGTGGGGAGGGCTTCTGTGACAGCTGTTCATCAAAGACT  
CGGCCAGTGCCTGAGCGGGGCTGGGGCCCTGCGCCAGTGCGGGTCTGTGACAACTGCTACGAAGCCAGGA  
ACGTCCAGTTAGCTGTTACCGAGGCACAAGTGGACGATGAAGGTGGAACGCTCATTGCTCGGAAGGTGGG  
CGAGGCCGTGCAGAACTCTGGGAGCCGTGGTGACAGCCATTGACATACCACTAGGTCTGGTAAAGGAC  
GCGGCCAGGCCTGCGTACTGGGTGCCTGACCACGAAATCCTCCACTGCCACAAGTCCCGGAAGGAGTTCA  
GCATCAAGCTCTCCAAGCACCCTGCCGGGCTGCGGACAGGGCTTCTGTGATGAGTGCTCCCATGACCG  
CCGGGCTGTTCTTCTCGTGGCTGGGACCATCCCGTCCGAGTCTGCTTCAACTGCAATAAAAAGCCCGT  
GACCTTTAACCCAGCCCCCTCTCCGAGTCCTTACAATTCCTTAGGTTCTCAGGGTTAGAAACAGTCTT  
GCGAGGTAGGCCCTCCTCCAGTCACCTGCTGTGGTGTGTGTCCTCTCCTCTCCGCATCCAGGGCCACTT  
TCCCTCAGTGGGGGTGAGCCTGGCGGCAGGCCCGAAGGTGTGGACCCCTCAGGGCAGGGGACCTTGCAAC  
TTATCGCAAAGGGGAATGAACCTGAATCCGTTGCATTTATTCAGTTAAAAATAATGAATATATATGTGT  
ATATCTCTCTCATATATACATATGAAAGGCACTCGGGGCGTATCGAGGCTGCTGCTGGCTGTGAAGAC  
TTCGCACAGTCTCCTCCGCACAGGGTGAGGTGGCAGTGGCAGCACGTCTTCTCATGAGCCGAGCCAGGT  
CCATGGCCACCACGTGGCTGGCCCCTTCTCTGCTGCTCTTGAGCCTTGGAAGCCTCTCCTGTCCTTGG  
CTCTTCCCTCCATGCCTGTCAGCTGCCTGGGGAGTGAGCCTCCCTGGTCCTTCTGCCTGAAACAGCCTG  
AAGGGAATTCTCCCTAGGTCTCCTGGGAGTCGAGTCCCAATTCTTGGCTTAAGCCTGTTTTAGTCAGAGA  
CCACCCAACTTAGCGTGCAGGTCACCGGAGTGGGTGGAGGGTCAGAGGTCGGGTCTTCGGCCCTGAGAAG  
TAGAAATGCAGGGGCCGTGCTGTCCCTGGTCCCCAGGGAACAGCAAGGAAGGAAGTGAAGCCTTCTCCAG  
CAGGGCTTCTGTCCCGATGCTTCTGTCTCCACTCGGCTTTCCCAAAGGCGGCACCCAGCTCCTCAATC  
GAAGCATCTGCCTCCACCCCTCGGCCCCCTCAAGCCCACCATCTGCTTCTGAGTGTGCGCACTAGGATTT  
TCATTGCTTATTTTAAAGTGTCTTAATCCTTTGTTCCAGACACACAACCCCTCTAGCTCTCGGAGGGGC  
GATCATGAGAAACCTTCCAGGGAACTGAGCACAGGATGAACTGTTAGTTGTTTTTAAAGTCTATATAA  
ATATTTCAACAGATCGTAAAGAAAAAATTTATCTTTGGTCCTTGCAAGAGAAGTCAAAGGAAGTCTTTG

TTTCTCCTCAAGAGCCTGGACATCTCTGTCTGTCATGACTGGAAAGGGCCCGTTGTGCTGAAATCCTATC  
ATCATGGTGGATTTGATCTTCAGTGGCCAAACACGAATTAAAGTATAATTCTTAAGTGAAGTGGTGGGTG  
GGTTGAGCTTTAGGGAAGTATATGGCGGTCATTCTGGTGCGCCTATCGGTGTGACATGAGCCCTGGAGT  
GTGTCGTCCTCTCAGCCCTGCTCCTCCTGCCTCCTGGGGTCCAGTGACTGGGACCCTACTCTAGAACTG  
TGTACCATCCAATTCGCCATCATAAAGGAATCTTCCTGCA
