# Supplementary material for: Analysis of the Compositional Features and Codon Usage Pattern of Genes Involved in Human Autophagy
Source: Cells. 2022 Oct 12;11(20):3203. doi: 10.3390/cells11203203 (PMC9601114; doi:10.3390/cells11203203)
Supplement: Supplementary file 1 [file cells-11-03203-s001.zip › Supplementary Table S4.pdf]

**Supplementary Table S4.** Improved effective number of codons (ENC) of all the human autophagy genes.

| SL. No. | Gene    | ENC   |
|---------|---------|-------|
| 1       | AMBRA1  | 49.45 |
| 2       | APOL1   | 49.72 |
| 3       | ARNT    | 50.48 |
| 4       | ARSA    | 37.34 |
| 5       | ARSB    | 51.06 |
| 6       | ATF4    | 46.92 |
| 7       | ATF6    | 50.64 |
| 8       | ATG10   | 47.73 |
| 9       | ATG101  | 35.28 |
| 10      | ATG12   | 42.79 |
| 11      | ATG13   | 49.49 |
| 12      | ATG14   | 51.53 |
| 13      | ATG16L1 | 52.7  |
| 14      | ATG16L2 | 39.59 |
| 15      | ATG2A   | 39.08 |
| 16      | ATG2B   | 51.23 |
| 17      | ATG3    | 44.06 |
| 18      | ATG4A   | 50.55 |
| 19      | ATG4B   | 45.5  |
| 20      | ATG4C   | 44.08 |
| 21      | ATG4D   | 37.59 |
| 22      | ATG5    | 41.76 |
| 23      | ATG7    | 53.45 |
| 24      | ATG9A   | 44.05 |
| 25      | ATG9B   | 41    |
| 26      | ATIC    | 50.7  |
| 27      | BAG1    | 46.4  |
| 28      | BAG3    | 46.41 |
| 29      | BAK1    | 38.94 |
| 30      | BAX     | 36.15 |
| 31      | BCL2    | 36.08 |
| 32      | BCL2L1  | 40.16 |
| 33      | BECN1   | 46.89 |
| 34      | BECN2   | 41.44 |
| 35      | BID     | 38.4  |
| 36      | BIRC5   | 42.56 |
| 37      | BIRC6   | 51.06 |
| 38      | BNIP1   | 49.98 |

|    |          |       |
|----|----------|-------|
| 39 | BNIP3    | 44.95 |
| 40 | BNIP3L   | 51.88 |
| 41 | CALCOCO2 | 48.54 |
| 42 | CAMKK2   | 41.47 |
| 43 | CANX     | 46.49 |
| 44 | CAPN1    | 36.69 |
| 45 | CAPN10   | 38.81 |
| 46 | CAPN2    | 45.83 |
| 47 | CAPNS1   | 43.47 |
| 48 | CASP1    | 51    |
| 49 | CASP3    | 45.63 |
| 50 | CASP4    | 49.1  |
| 51 | CASP8    | 49.82 |
| 52 | CCL2     | 36.95 |
| 53 | CCR2     | 47.79 |
| 54 | CD46     | 46.51 |
| 55 | CDKN1A   | 42.06 |
| 56 | CDKN1B   | 44.22 |
| 57 | CDKN2A   | 35.06 |
| 58 | CFLAR    | 49.43 |
| 59 | CHMP2B   | 40.89 |
| 60 | CHMP4B   | 45.76 |
| 61 | CLN3     | 42.85 |
| 62 | CTSB     | 42.81 |
| 63 | CTSD     | 33.26 |
| 64 | CTSL     | 45.07 |
| 65 | CX3CL1   | 42.47 |
| 66 | CXCR4    | 43.9  |
| 67 | DAPK1    | 48.37 |
| 68 | DAPK2    | 40.49 |
| 69 | DDIT3    | 41.33 |
| 70 | DIRAS3   | 33.65 |
| 71 | DLC1     | 53.83 |
| 72 | DNAJB1   | 47.34 |
| 73 | DNAJB9   | 44.81 |
| 74 | DRAM1    | 52.02 |
| 75 | EDEM1    | 50.74 |
| 76 | EEF2     | 34.14 |
| 77 | EEF2K    | 45.63 |
| 78 | EGFR     | 47.86 |
| 79 | EIF2AK2  | 47.94 |

|     |           |       |
|-----|-----------|-------|
| 80  | EIF2AK3   | 53.28 |
| 81  | EIF2S1    | 48.47 |
| 82  | EIF4EBP1  | 37.11 |
| 83  | EIF4G1    | 51.02 |
| 84  | ERBB2     | 41.53 |
| 85  | ERN1      | 44.44 |
| 86  | ERO1A     | 48.3  |
| 87  | FADD      | 35.55 |
| 88  | FAS       | 47.91 |
| 89  | FKBP1A    | 36.52 |
| 90  | FKBP1B    | 39.68 |
| 91  | FOS       | 42.4  |
| 92  | FOXO1     | 50.97 |
| 93  | FOXO3     | 46.1  |
| 94  | GAA       | 34.98 |
| 95  | GABARAP   | 39.33 |
| 96  | GABARAPL1 | 46.05 |
| 97  | GABARAPL2 | 41.53 |
| 98  | GAPDH     | 39.29 |
| 99  | GNAI3     | 52.11 |
| 100 | GOPC      | 49.98 |
| 101 | GRID1     | 42.43 |
| 102 | GRID2     | 54.6  |
| 103 | HDAC1     | 48.98 |
| 104 | HDAC6     | 46.69 |
| 105 | HGS       | 36.89 |
| 106 | HIF1A     | 47.83 |
| 107 | HSP90AB1  | 46.81 |
| 108 | HSPA5     | 48.46 |
| 109 | HSPA8     | 47.18 |
| 110 | HSPB8     | 42.79 |
| 111 | IFNG      | 45.49 |
| 112 | IKBKB     | 44.51 |
| 113 | IKBKE     | 39.43 |
| 114 | IL24      | 42.35 |
| 115 | IRGM      | 43.96 |
| 116 | ITGA3     | 40.57 |
| 117 | ITGA6     | 53.57 |
| 118 | ITGB1     | 50.24 |
| 119 | ITGB4     | 36.17 |
| 120 | ITPR1     | 51.69 |

|     |          |       |
|-----|----------|-------|
| 121 | KIF5B    | 49.31 |
| 122 | KLHL24   | 50.02 |
| 123 | LAMP1    | 44.56 |
| 124 | LAMP2    | 48.43 |
| 125 | MAP1LC3A | 33.44 |
| 126 | MAP1LC3B | 45.28 |
| 127 | MAP1LC3C | 36.23 |
| 128 | MAP2K7   | 35.81 |
| 129 | MAPK1    | 49.34 |
| 130 | MAPK3    | 36.3  |
| 131 | MAPK8    | 50.71 |
| 132 | MAPK8IP1 | 40.19 |
| 133 | MAPK9    | 48.53 |
| 134 | MBTPS2   | 51.39 |
| 135 | MLST8    | 35.48 |
| 136 | MTMR14   | 45.03 |
| 137 | MTOR     | 48.74 |
| 138 | MYC      | 42.97 |
| 139 | NAF1     | 50.26 |
| 140 | NAMPT    | 49.32 |
| 141 | NBR1     | 51.52 |
| 142 | NCKAP1   | 50.31 |
| 143 | NFE2L2   | 51.54 |
| 144 | NFKB1    | 52.19 |
| 145 | NKX2-3   | 38.6  |
| 146 | NLRC4    | 52.42 |
| 147 | NPC1     | 52.64 |
| 148 | NRBF2    | 46.79 |
| 149 | NRG1     | 52.69 |
| 150 | NRG2     | 39.02 |
| 151 | NRG3     | 51.99 |
| 152 | P4HB     | 38.79 |
| 153 | PARP1    | 50.69 |
| 154 | PEA15    | 37.36 |
| 155 | PELP1    | 48.21 |
| 156 | PEX14    | 40.43 |
| 157 | PEX3     | 47.71 |
| 158 | PIK3C3   | 49.5  |
| 159 | PIK3R4   | 51.87 |
| 160 | PINK1    | 44.64 |
| 161 | PPP1R15A | 47.84 |

|     |          |       |
|-----|----------|-------|
| 162 | PRKAB1   | 45.71 |
| 163 | PRKAR1A  | 51.43 |
| 164 | PRKCD    | 40.28 |
| 165 | PRKCQ    | 52.11 |
| 166 | PRKN     | 49.97 |
| 167 | PTEN     | 48.25 |
| 168 | PTK6     | 36.65 |
| 169 | RAB11A   | 42.53 |
| 170 | RAB1A    | 46.93 |
| 171 | RAB24    | 36.79 |
| 172 | RAB33B   | 48.32 |
| 173 | RAB5A    | 42.26 |
| 174 | RAB7A    | 42.71 |
| 175 | RAC1     | 49.19 |
| 176 | RACK1    | 41.09 |
| 177 | RAF1     | 53.38 |
| 178 | RB1      | 49.93 |
| 179 | RB1CC1   | 46.5  |
| 180 | RELA     | 42.01 |
| 181 | RGS19    | 34.4  |
| 182 | RHEB     | 39.62 |
| 183 | RPS6KB1  | 48.45 |
| 184 | RPTOR    | 43    |
| 185 | RUBCN    | 45.75 |
| 186 | SAR1A    | 47.35 |
| 187 | SERPINA1 | 41.36 |
| 188 | SESN2    | 37.76 |
| 189 | SH3GLB1  | 47.32 |
| 190 | SIRT1    | 50.47 |
| 191 | SIRT2    | 40.72 |
| 192 | SPHK1    | 40    |
| 193 | SPNS1    | 37.43 |
| 194 | SQSTM1   | 46.27 |
| 195 | ST13     | 47.92 |
| 196 | STK11    | 35.01 |
| 197 | SUPT20H  | 50.58 |
| 198 | TBK1     | 46.77 |
| 199 | TM9SF1   | 46.38 |
| 200 | TMEM41B  | 42.19 |
| 201 | TMEM74   | 47.65 |
| 202 | TNFSF10  | 39.4  |

|     |          |       |
|-----|----------|-------|
| 203 | TP53     | 47.62 |
| 204 | TP53INP2 | 35.67 |
| 205 | TP63     | 50.55 |
| 206 | TP73     | 36.06 |
| 207 | TSC1     | 52.87 |
| 208 | TSC2     | 39.75 |
| 209 | TUSC1    | 35.13 |
| 210 | ULK1     | 34.8  |
| 211 | ULK2     | 53.45 |
| 212 | ULK3     | 40.78 |
| 213 | USP10    | 54.48 |
| 214 | UVRAG    | 54.02 |
| 215 | VAMP3    | 39.42 |
| 216 | VAMP7    | 48.69 |
| 217 | VEGFA    | 47.69 |
| 218 | VMP1     | 48.97 |
| 219 | WDFY3    | 54.5  |
| 220 | WDR45    | 39.85 |
| 221 | WDR45B   | 51.15 |
| 222 | WIPI1    | 51.58 |
| 223 | WIPI2    | 45.27 |
| 224 | ZFYVE1   | 49.56 |
