# Supplementary material for: Analysis of the Compositional Features and Codon Usage Pattern of Genes Involved in Human Autophagy
Source: Cells. 2022 Oct 12;11(20):3203. doi: 10.3390/cells11203203 (PMC9601114; doi:10.3390/cells11203203)
Supplement: Supplementary file 1 [file cells-11-03203-s001.zip › Supplementary Table S5.pdf]

**Supplementary Table S5.** Minimum free energy (mFE) of mRNA of human autophagy genes.

| SL. No | Human Autophagy Gene | mFE of mRNA (kcal/mol)<br>(Absolute values) |
|--------|----------------------|---------------------------------------------|
| 1      | <i>AMBRA1</i>        | 1942.6                                      |
| 2      | <i>APOL1</i>         | 1279.5                                      |
| 3      | <i>ARNT</i>          | 1452.5                                      |
| 4      | <i>ARSA</i>          | 2036.5                                      |
| 5      | <i>ARSB</i>          | 1567.1                                      |
| 6      | <i>ATF4</i>          | 809.5                                       |
| 7      | <i>ATF6</i>          | 2068.2                                      |
| 8      | <i>ATG10</i>         | 1038.7                                      |
| 9      | <i>ATG101</i>        | 626.3                                       |
| 10     | <i>ATG12</i>         | 1083.62                                     |
| 11     | <i>ATG13</i>         | 1491.7                                      |
| 12     | <i>ATG14</i>         | 1671.8                                      |
| 13     | <i>ATG16L1</i>       | 1123.9                                      |
| 14     | <i>ATG16L2</i>       | 962.8                                       |
| 15     | <i>ATG2A</i>         | 2808.9                                      |
| 16     | <i>ATG2B*</i>        | -                                           |
| 17     | <i>ATG3</i>          | 485.2                                       |
| 18     | <i>ATG4A</i>         | 598.2                                       |
| 19     | <i>ATG4B</i>         | 1129.8                                      |
| 20     | <i>ATG4C</i>         | 708.7                                       |
| 21     | <i>ATG4D</i>         | 896.6                                       |
| 22     | <i>ATG5</i>          | 815.5                                       |
| 23     | <i>ATG7</i>          | 1772.5                                      |
| 24     | <i>ATG9A</i>         | 1497                                        |
| 25     | <i>ATG9B</i>         | 1949.1                                      |
| 26     | <i>AT1C</i>          | 602.9                                       |
| 27     | <i>BAG1</i>          | 1290.8                                      |
| 28     | <i>BAG3</i>          | 902.1                                       |
| 29     | <i>BAK1</i>          | 939                                         |
| 30     | <i>BAX</i>           | 267.3                                       |
| 31     | <i>BCL2</i>          | 2110.5                                      |
| 32     | <i>BCL2L1</i>        | 1005.4                                      |
| 33     | <i>BECN1</i>         | 659.5                                       |
| 34     | <i>BECN2</i>         | 549                                         |
| 35     | <i>BID</i>           | 836                                         |
| 36     | <i>BIRC5</i>         | 927.5                                       |
| 37     | <i>BIRC6*</i>        | -                                           |

|    |                 |         |
|----|-----------------|---------|
| 38 | <i>BNIP1</i>    | 390.4   |
| 39 | <i>BNIP3</i>    | 416.7   |
| 40 | <i>BNIP3L</i>   | 862.1   |
| 41 | <i>CALCOCO2</i> | 1027.1  |
| 42 | <i>CAMKK2</i>   | 1842.6  |
| 43 | <i>CANX</i>     | 1316.8  |
| 44 | <i>CAPN1</i>    | 1216.8  |
| 45 | <i>CAPN10</i>   | 1276.8  |
| 46 | <i>CAPN2</i>    | 1119.87 |
| 47 | <i>CAPNS1</i>   | 566.9   |
| 48 | <i>CASP1</i>    | 405     |
| 49 | <i>CASP3</i>    | 703.8   |
| 50 | <i>CASP4</i>    | 348.2   |
| 51 | <i>CASP8</i>    | 936.4   |
| 52 | <i>CCL2</i>     | 170.2   |
| 53 | <i>CCR2</i>     | 716.1   |
| 54 | <i>CD46</i>     | 843     |
| 55 | <i>CDKN1A</i>   | 842.9   |
| 56 | <i>CDKN1B</i>   | 772.4   |
| 57 | <i>CDKN2A</i>   | 400.5   |
| 58 | <i>CFLAR*</i>   | -       |
| 59 | <i>CHMP2B</i>   | 600.5   |
| 60 | <i>CHMP4B</i>   | 561.6   |
| 61 | <i>CLN3</i>     | 776.1   |
| 62 | <i>CTSB</i>     | 1596.4  |
| 63 | <i>CTSD</i>     | 895.7   |
| 64 | <i>CTSL</i>     | 545.3   |
| 65 | <i>CX3CL1</i>   | 1383.8  |
| 66 | <i>CXCR4</i>    | 524.1   |
| 67 | <i>DAPK1</i>    | 2049.9  |
| 68 | <i>DAPK2</i>    | 1057.6  |
| 69 | <i>DDIT3</i>    | 298.4   |
| 70 | <i>DIRAS3</i>   | 441.3   |
| 71 | <i>DLC1</i>     | 2207.2  |
| 72 | <i>DNAJB1</i>   | 784.9   |
| 73 | <i>DNAJB9</i>   | 636.8   |
| 74 | <i>DRAM1</i>    | 1007.2  |
| 75 | <i>EDEM1</i>    | 1990.3  |
| 76 | <i>EEF2</i>     | 1255    |
| 77 | <i>EEF2K</i>    | 2753.1  |
| 78 | <i>EGFR</i>     | 3138    |

|     |                  |         |
|-----|------------------|---------|
| 79  | <i>EIF2AK2*</i>  | -       |
| 80  | <i>EIF2AK3</i>   | 1383.2  |
| 81  | <i>EIF2S1</i>    | 1094.4  |
| 82  | <i>EIF4EBP1</i>  | 325.6   |
| 83  | <i>EIF4G1</i>    | 2194.5  |
| 84  | <i>ERBB2</i>     | 1919.3  |
| 85  | <i>ERN1</i>      | 2689.6  |
| 86  | <i>ERO1A</i>     | 1278.6  |
| 87  | <i>FADD</i>      | 702.9   |
| 88  | <i>FAS</i>       | 923.8   |
| 89  | <i>FKBP1A</i>    | 471.8   |
| 90  | <i>FKBP1B</i>    | 313.3   |
| 91  | <i>FOS</i>       | 722.9   |
| 92  | <i>FOXO1</i>     | 1827.9  |
| 93  | <i>FOXO3</i>     | 2461.8  |
| 94  | <i>GAA</i>       | 1754.4  |
| 95  | <i>GABARAP</i>   | 419.5   |
| 96  | <i>GABARAPL1</i> | 330.84  |
| 97  | <i>GABARAPL2</i> | 272.3   |
| 98  | <i>GAPDH</i>     | 468.4   |
| 99  | <i>GNAI3</i>     | 2641.4  |
| 100 | <i>GOPC</i>      | 1249.44 |
| 101 | <i>GRID1</i>     | 2369.12 |
| 102 | <i>GRID2</i>     | 1349.41 |
| 103 | <i>HDAC1</i>     | 687.2   |
| 104 | <i>HDAC6</i>     | 1630.4  |
| 105 | <i>HGS</i>       | 1219.1  |
| 106 | <i>HIF1A</i>     | 960.8   |
| 107 | <i>HSP90AB1</i>  | 762.1   |
| 108 | <i>HSPA5</i>     | 1228.6  |
| 109 | <i>HSPA8</i>     | 683.2   |
| 110 | <i>HSPB8</i>     | 668.8   |
| 111 | <i>IFNG</i>      | 274.6   |
| 112 | <i>IKBKB</i>     | 1329.5  |
| 113 | <i>IKBKE</i>     | 1283.1  |
| 114 | <i>IL24</i>      | 628.9   |
| 115 | <i>IRGM</i>      | 535.6   |
| 116 | <i>ITGA3</i>     | 2102.1  |
| 117 | <i>ITGA6</i>     | 1678.7  |
| 118 | <i>ITGB1</i>     | 1012.1  |
| 119 | <i>ITGB4</i>     | 2524.9  |

|     |                 |         |
|-----|-----------------|---------|
| 120 | <i>ITPR1</i>    | 3087.2  |
| 121 | <i>KIF5B</i>    | 1548.6  |
| 122 | <i>KLHL24</i>   | 1917.1  |
| 123 | <i>LAMP1</i>    | 1028    |
| 124 | <i>LAMP2</i>    | 936.87  |
| 125 | <i>MAP1LC3A</i> | 385.9   |
| 126 | <i>MAP1LC3B</i> | 557.6   |
| 127 | <i>MAP1LC3C</i> | 413.6   |
| 128 | <i>MAP2K7</i>   | 1525.37 |
| 129 | <i>MAPK1</i>    | 1758.1  |
| 130 | <i>MAPK3</i>    | 435.2   |
| 131 | <i>MAPK8</i>    | 1470.7  |
| 132 | <i>MAPK8IP1</i> | 1362.5  |
| 133 | <i>MAPK9</i>    | 639.1   |
| 134 | <i>MBTPS2</i>   | 1223.3  |
| 135 | <i>MLST8</i>    | 713.7   |
| 136 | <i>MTMR14</i>   | 815.6   |
| 137 | <i>MTOR</i>     | 3063.3  |
| 138 | <i>MYC</i>      | 1494.8  |
| 139 | <i>NAF1</i>     | 550.1   |
| 140 | <i>NAMPT</i>    | 1032.27 |
| 141 | <i>NBR1</i>     | 1444.9  |
| 142 | <i>NCKAP1*</i>  | -       |
| 143 | <i>NFE2L2</i>   | 628.3   |
| 144 | <i>NFKB1</i>    | 1349.6  |
| 145 | <i>NKX2-3</i>   | 941.5   |
| 146 | <i>NLRC4</i>    | 1008.7  |
| 147 | <i>NPC1</i>     | 1564.3  |
| 148 | <i>NRBF2</i>    | 497.9   |
| 149 | <i>NRG1*</i>    | -       |
| 150 | <i>NRG2</i>     | 1664.5  |
| 151 | <i>NRG3</i>     | 1227.8  |
| 152 | <i>P4HB</i>     | 935.1   |
| 153 | <i>PARP1</i>    | 1342.6  |
| 154 | <i>PEA15</i>    | 857.3   |
| 155 | <i>PELP1</i>    | 1929.6  |
| 156 | <i>PEX14</i>    | 804.6   |
| 157 | <i>PEX3</i>     | 680.6   |
| 158 | <i>PIK3C3</i>   | 2472    |
| 159 | <i>PIK3R4</i>   | 1456.4  |
| 160 | <i>PINK1</i>    | 1116.7  |

|     |                 |         |
|-----|-----------------|---------|
| 161 | <i>PPP1R15A</i> | 920.91  |
| 162 | <i>PRKAB1</i>   | 758.5   |
| 163 | <i>PRKARIA</i>  | 1189.7  |
| 164 | <i>PRKCD</i>    | 951     |
| 165 | <i>PRKCQ</i>    | 990.7   |
| 166 | <i>PRKN</i>     | 1327.3  |
| 167 | <i>PTEN</i>     | 2197.1  |
| 168 | <i>PTK6</i>     | 1179    |
| 169 | <i>RAB11A</i>   | 1227.4  |
| 170 | <i>RAB1A</i>    | 633.5   |
| 171 | <i>RAB24</i>    | 623.6   |
| 172 | <i>RAB33B</i>   | 1046.3  |
| 173 | <i>RAB5A</i>    | 694.5   |
| 174 | <i>RAB7A</i>    | 610.1   |
| 175 | <i>RAC1</i>     | 663.7   |
| 176 | <i>RACK1</i>    | 393.2   |
| 177 | <i>RAF1</i>     | 1090.8  |
| 178 | <i>RBI</i>      | 1155.9  |
| 179 | <i>RB1CC1</i>   | 1682.34 |
| 180 | <i>RELA</i>     | 970.1   |
| 181 | <i>RGS19</i>    | 695     |
| 182 | <i>RHEB</i>     | 690.2   |
| 183 | <i>RPS6KB1</i>  | 1365.4  |
| 184 | <i>RPTOR</i>    | 2777.3  |
| 185 | <i>RUBCN</i>    | 3155.12 |
| 186 | <i>SAR1A</i>    | 1945.07 |
| 187 | <i>SERPINA1</i> | 1081    |
| 188 | <i>SESN2</i>    | 1454.6  |
| 189 | <i>SH3GLB1</i>  | 1661.8  |
| 190 | <i>SIRT1</i>    | 1181.3  |
| 191 | <i>SIRT2</i>    | 659.4   |
| 192 | <i>SPHK1</i>    | 1050.4  |
| 193 | <i>SPNS1</i>    | 1011.7  |
| 194 | <i>SQSTM1</i>   | 1168.6  |
| 195 | <i>ST13</i>     | 850.8   |
| 196 | <i>STK11</i>    | 1633.9  |
| 197 | <i>SUPT20H</i>  | 808.7   |
| 198 | <i>TBK1</i>     | 744.3   |
| 199 | <i>TM9SF1</i>   | 761.5   |
| 200 | <i>TMEM41B</i>  | 212.2   |
| 201 | <i>TMEM74</i>   | 1704.1  |

|     |                 |        |
|-----|-----------------|--------|
| 202 | <i>TNFSF10</i>  | 441.6  |
| 203 | <i>TP53</i>     | 892.4  |
| 204 | <i>TP53INP2</i> | 1483.3 |
| 205 | <i>TP63</i>     | 1329.2 |
| 206 | <i>TP73</i>     | 2174.4 |
| 207 | <i>TSC1</i>     | 2753.3 |
| 208 | <i>TSC2</i>     | 2663.9 |
| 209 | <i>TUSC1</i>    | 646.7  |
| 210 | <i>ULK1</i>     | 2352.7 |
| 211 | <i>ULK2</i>     | 3028.3 |
| 212 | <i>ULK3</i>     | 1124.1 |
| 213 | <i>USP10</i>    | 1036.2 |
| 214 | <i>UVRAG</i>    | 1589.1 |
| 215 | <i>VAMP3</i>    | 597.4  |
| 216 | <i>VAMP7</i>    | 638.4  |
| 217 | <i>VEGFA</i>    | 1345.7 |
| 218 | <i>VMP1</i>     | 1037   |
| 219 | <i>WDFY3*</i>   | -      |
| 220 | <i>WDR45</i>    | 743.6  |
| 221 | <i>WDR45B</i>   | 834    |
| 222 | <i>WIPI1</i>    | 591.2  |
| 223 | <i>WIPI2</i>    | 1657.9 |
| 224 | <i>ZFYVE1</i>   | 1590.2 |
